# Supplementary material for: Whole transcriptome targeted gene quantification provides new insights on pulmonary sarcomatoid carcinomas
Source: PubMed Central journal article supplement (PMC6401130; doi:10.1038/s41598-019-40016-8), 2019-03-05
Supplement: 41598_2019_40016_MOESM1_ESM.pdf [file 41598_2019_40016_MOESM1_ESM.pdf]

**Manuscript title:** Whole transcriptome targeted gene quantification provides new insights on pulmonary sarcomatoid carcinomas.

**List of authors:** Greta Alì, Rossella Bruno, Anello Marcello Poma, Ornella Affinito, Antonella Monticelli, Paolo Piaggi, Sara Ricciardi, Marco Lucchi, Franca Melfi, Sergio Cocozza, Gabriella Fontanini

**Table S1\_A: edgeR results**

logFC, log fold change; logCPM, log counts per million; p value; FDR, Benjamini-Hochberg adjusted p value are reported for pulmonary sarcomatoid carcinoma (PSC) dataset

| Gene    | logFC        | logCPM      | PValue      | FDR         |
|---------|--------------|-------------|-------------|-------------|
| FOS     | -4,391524687 | 8,045383673 | 7,79761E-16 | 5,31719E-12 |
| SUSD2   | -4,127545784 | 5,747464472 | 1,42839E-14 | 4,8701E-11  |
| PDK4    | -3,449094984 | 6,624040802 | 2,69633E-14 | 6,12877E-11 |
| HBB     | -4,000959411 | 8,091884511 | 2,05019E-13 | 3,49506E-10 |
| NEDD9   | -2,871217174 | 5,596860504 | 1,05006E-12 | 1,43207E-09 |
| CTSH    | -2,715608361 | 7,331559743 | 1,96072E-11 | 2,22836E-08 |
| AGER    | -4,285545723 | 6,867738471 | 1,8499E-10  | 1,80206E-07 |
| APOC1   | -3,35513203  | 7,197806891 | 2,40273E-10 | 2,04803E-07 |
| EMP2    | -2,805607995 | 7,603382253 | 5,41029E-10 | 4,0992E-07  |
| SPATA6  | -2,617382393 | 4,127477021 | 7,87138E-10 | 5,36749E-07 |
| ZFP36   | -2,884071812 | 9,174200917 | 2,17542E-09 | 1,30746E-06 |
| GPX3    | -2,994025193 | 8,141118342 | 2,30085E-09 | 1,30746E-06 |
| BTG2    | -3,290054256 | 7,610240201 | 4,92853E-09 | 2,5852E-06  |
| DUSP1   | -2,736006837 | 8,751426621 | 8,25714E-09 | 3,80031E-06 |
| CSRNP1  | -2,341479304 | 5,3874307   | 8,35968E-09 | 3,80031E-06 |
| GPR146  | -2,311391013 | 5,499867416 | 1,4082E-08  | 6,00155E-06 |
| CAT     | -2,378898336 | 6,917650559 | 3,88206E-08 | 1,55716E-05 |
| CYP27A1 | -2,713467271 | 5,686629346 | 4,81395E-08 | 1,82369E-05 |
| NDRG2   | -2,523475475 | 5,531125924 | 6,00335E-08 | 2,15457E-05 |
| DYSF    | -2,389744178 | 4,517937154 | 8,40812E-08 | 2,86675E-05 |
| ELMO1   | -2,427718926 | 5,124116645 | 9,06177E-08 | 2,94249E-05 |
| UNC13B  | -2,408529453 | 5,728288659 | 1,04159E-07 | 3,22846E-05 |
| ARRB1   | -2,088010274 | 5,499353335 | 1,22157E-07 | 3,6217E-05  |
| KLF2    | -2,942019041 | 6,968589682 | 1,28714E-07 | 3,65708E-05 |
| GADD45B | -2,612805863 | 6,376825297 | 1,76336E-07 | 4,80974E-05 |
| LRRK2   | -3,245531901 | 6,66374042  | 2,05472E-07 | 5,38889E-05 |
| DLGAP5  | 3,997663389  | 7,049186818 | 2,62693E-07 | 6,3635E-05  |
| AQP1    | -3,159775986 | 8,303307702 | 2,66389E-07 | 6,3635E-05  |
| STX11   | -2,497678505 | 4,903315836 | 2,70628E-07 | 6,3635E-05  |
| SLC43A2 | -2,063294183 | 5,470827032 | 4,3578E-07  | 9,65824E-05 |
| VWF     | -2,561108735 | 7,567919633 | 4,39075E-07 | 9,65824E-05 |
| NR2F1   | -2,225456359 | 5,568963679 | 6,0945E-07  | 0,00012987  |
| STOM    | -2,506296536 | 7,294282291 | 8,7299E-07  | 0,000180392 |
| IGJ     | -3,89224826  | 8,959316905 | 9,90853E-07 | 0,000194547 |
| ALOX5   | -2,296402161 | 5,914557486 | 9,98555E-07 | 0,000194547 |
| SLC39A8 | -2,290511124 | 6,504750553 | 1,23302E-06 | 0,000233554 |
| CFD     | -2,738931404 | 5,583585933 | 1,61492E-06 | 0,000297625 |
| LMCD1   | -2,067895202 | 6,276733312 | 1,85069E-06 | 0,000332101 |
| UBE2T   | 2,948268179  | 6,669936105 | 2,05243E-06 | 0,00035886  |
| CCNB2   | 3,242707839  | 5,53469099  | 2,17128E-06 | 0,000370149 |
| SLC2A1  | 3,606267485  | 7,812898272 | 3,14404E-06 | 0,000522907 |
| ALDH2   | -1,91687292  | 8,014956142 | 3,49603E-06 | 0,000567605 |
| ATF3    | -2,015824563 | 6,471671168 | 4,23065E-06 | 0,000670903 |

|           |              |             |             |             |
|-----------|--------------|-------------|-------------|-------------|
| ITGA1     | -2,145623168 | 6,604416731 | 4,79264E-06 | 0,00074275  |
| ARHGAP31  | -1,818569625 | 5,781784523 | 5,09394E-06 | 0,000761693 |
| AFAP1L1   | -2,479699337 | 5,354355252 | 5,13827E-06 | 0,000761693 |
| PLK1      | 2,856930473  | 5,307467889 | 6,78582E-06 | 0,000984521 |
| CCNB1     | 2,911810141  | 6,125608609 | 9,04827E-06 | 0,001285419 |
| MYO6      | -1,811862102 | 5,721703075 | 1,05719E-05 | 0,001471225 |
| RAPGEF2   | -1,731198885 | 3,465351772 | 1,1715E-05  | 0,00159769  |
| C10orf54  | -2,093500746 | 5,134933767 | 1,2163E-05  | 0,001626268 |
| RASIP1    | -2,217822277 | 6,300836319 | 1,2921E-05  | 0,001689669 |
| RNPC3     | -2,186001306 | 6,98543433  | 1,31328E-05 | 0,001689669 |
| HLX       | -1,983927014 | 4,690954795 | 1,36219E-05 | 0,001720139 |
| CD93      | -2,186838848 | 6,664975604 | 1,41273E-05 | 0,001751524 |
| SLC40A1   | -2,004693269 | 7,20736294  | 1,51955E-05 | 0,001843651 |
| EPAS1     | -2,02350967  | 7,346392739 | 1,54111E-05 | 0,001843651 |
| PIK3C2B   | -1,909009875 | 5,145804139 | 1,6757E-05  | 0,001970099 |
| ENG       | -1,995800814 | 6,769932597 | 1,85867E-05 | 0,002148186 |
| CD52      | -2,633306778 | 7,911422351 | 1,96221E-05 | 0,002230055 |
| FAM82A2   | -1,696816467 | 4,694275328 | 2,06979E-05 | 0,002313755 |
| RALGAPA2  | -1,870577783 | 5,953933761 | 2,21095E-05 | 0,002431693 |
| SEPP1     | -1,912232356 | 8,978322774 | 2,31965E-05 | 0,00247336  |
| LIMD1     | -1,696600163 | 5,373784683 | 2,32138E-05 | 0,00247336  |
| SERPING1  | -2,153824728 | 8,697498936 | 2,47071E-05 | 0,002591966 |
| TTK       | 2,936746972  | 5,238217894 | 2,71115E-05 | 0,002801107 |
| ACP5      | -2,417644911 | 6,528001248 | 3,00302E-05 | 0,003056361 |
| DLC1      | -2,539849543 | 6,374775938 | 3,26306E-05 | 0,003272175 |
| SPTBN1    | -1,734307416 | 9,122996963 | 3,81461E-05 | 0,003769827 |
| GATA6     | -2,189649998 | 5,272339617 | 4,01323E-05 | 0,003909464 |
| UBE2C     | 3,49705508   | 7,699064843 | 4,63607E-05 | 0,004452589 |
| PYCR1     | 2,869070268  | 6,467020901 | 5,15707E-05 | 0,004884172 |
| RRM2      | 2,973014126  | 7,483990249 | 5,51376E-05 | 0,005099645 |
| LTBP2     | -2,247625779 | 6,084412083 | 5,53415E-05 | 0,005099645 |
| ZNF641    | -1,526160158 | 3,464394377 | 6,35414E-05 | 0,005777185 |
| ARHGAP11A | 2,912288237  | 5,837477582 | 6,7478E-05  | 0,006054372 |
| MLLT4     | -1,426309879 | 6,608174847 | 6,92801E-05 | 0,006135334 |
| EPB41L1   | -1,607761459 | 5,14885004  | 7,04649E-05 | 0,006160259 |
| CD74      | -2,295229627 | 8,201516364 | 7,18341E-05 | 0,006200464 |
| APLP2     | -1,911260402 | 8,08987779  | 7,78785E-05 | 0,006638172 |
| ADRB2     | -2,210728856 | 5,132323464 | 8,298E-05   | 0,006985684 |
| CYR61     | -2,075032627 | 7,796100932 | 8,56555E-05 | 0,007122986 |
| SOCS3     | -1,948027854 | 6,815079233 | 0,00010136  | 0,008327361 |
| CFLAR     | -1,562471229 | 6,647367022 | 0,000103032 | 0,008363981 |
| XRCC2     | 2,669232523  | 4,907749021 | 0,000106058 | 0,008508349 |
| PFKP      | 2,060128684  | 6,103114272 | 0,000113538 | 0,008894181 |
| DCAF13    | 2,253850546  | 6,45006168  | 0,000114662 | 0,008894181 |
| DKC1      | 2,215829769  | 6,562710528 | 0,00011478  | 0,008894181 |
| LILRA6    | -1,889021876 | 5,179821479 | 0,000118194 | 0,009020536 |
| HAGH      | -1,587481853 | 4,451987337 | 0,000119057 | 0,009020536 |
| CCNA2     | 2,293281747  | 6,431522066 | 0,000123103 | 0,00922461  |
| KARS      | 2,03596428   | 5,802834356 | 0,000132207 | 0,009799091 |
| TCP11L2   | -1,42331118  | 4,564569781 | 0,000135708 | 0,009950434 |

|          |              |             |             |             |
|----------|--------------|-------------|-------------|-------------|
| MYADM    | -2,012312461 | 7,021555665 | 0,00014112  | 0,010237186 |
| UTRN     | -1,635703202 | 7,069111106 | 0,000152917 | 0,010976234 |
| TOP2A    | 2,602844452  | 6,740759562 | 0,000165594 | 0,011762356 |
| JUNB     | -1,909522544 | 9,49610397  | 0,000170657 | 0,011996993 |
| MRC1     | -2,098848382 | 6,906417967 | 0,000179443 | 0,012422491 |
| ASAHI    | -1,982563959 | 6,828055512 | 0,000180353 | 0,012422491 |
| DOCK9    | -1,799978582 | 6,025520287 | 0,000198956 | 0,013566824 |
| SIK2     | -1,55715178  | 4,698976274 | 0,000207785 | 0,014028552 |
| BUB1     | 3,389734226  | 6,009651949 | 0,0002133   | 0,014259705 |
| EFEMP1   | -1,773306334 | 6,76281159  | 0,000223306 | 0,014783725 |
| ALOX5AP  | -2,157106927 | 6,679022385 | 0,000236721 | 0,01552114  |
| CYB5A    | -2,006590095 | 6,511205525 | 0,000240409 | 0,015612862 |
| GRK5     | -1,431961103 | 6,175793407 | 0,000245381 | 0,015785397 |
| CENPN    | 2,645319543  | 5,7618525   | 0,000248387 | 0,015829478 |
| RUFY3    | -1,49484097  | 4,630902987 | 0,000253938 | 0,016033362 |
| BDH2     | -1,340809325 | 5,526308505 | 0,00026731  | 0,016481117 |
| PTTG1    | 2,394287861  | 6,352129736 | 0,000267879 | 0,016481117 |
| HLA-DMA  | -1,693259871 | 6,788991261 | 0,00026828  | 0,016481117 |
| SORBS3   | -1,635652661 | 6,52959648  | 0,000275386 | 0,016750309 |
| CRABP2   | 3,948748159  | 6,799560613 | 0,000278525 | 0,016750309 |
| RRN3P2   | -2,194198104 | 5,673095149 | 0,000280032 | 0,016750309 |
| LAIR1    | -1,545858818 | 6,195038698 | 0,000301878 | 0,017900045 |
| KLF4     | -2,006963257 | 6,553448136 | 0,000322126 | 0,018935995 |
| ARRDC4   | -1,656340794 | 4,836814109 | 0,000343187 | 0,019947529 |
| BOD1     | 2,208016266  | 6,355453318 | 0,000345184 | 0,019947529 |
| ATP6V0C  | -1,581323409 | 7,275685302 | 0,000369592 | 0,02117853  |
| SLC20A1  | 1,938769834  | 7,819363442 | 0,000407786 | 0,023094118 |
| LRP1     | -1,558762718 | 7,519925568 | 0,000409794 | 0,023094118 |
| ID2      | -1,45781113  | 6,186281633 | 0,000434389 | 0,024183022 |
| GIMAP6   | -1,700125471 | 5,31203855  | 0,000441371 | 0,024183022 |
| ASPM     | 2,653583072  | 5,889523375 | 0,000443112 | 0,024183022 |
| PDLIM4   | 2,40368338   | 5,595260611 | 0,000443302 | 0,024183022 |
| HYAL2    | -1,637175204 | 6,187130106 | 0,000449389 | 0,024218757 |
| NDST1    | -1,507882714 | 6,763963797 | 0,000451061 | 0,024218757 |
| FANCD2   | 2,269971786  | 5,747268747 | 0,000461469 | 0,024571261 |
| TXNDC5   | -1,363504008 | 8,136925824 | 0,000466911 | 0,024571261 |
| KLF10    | -1,868450994 | 7,48308076  | 0,000468436 | 0,024571261 |
| NR2F2    | -1,680059749 | 6,232257367 | 0,000477384 | 0,024722134 |
| HSPD1    | 2,373279356  | 9,324723675 | 0,000480403 | 0,024722134 |
| CYGB     | -1,996735663 | 4,358015206 | 0,000482189 | 0,024722134 |
| HSD17B11 | -1,574902558 | 5,918215973 | 0,000495015 | 0,025190363 |
| UBE2S    | 2,015168666  | 7,680290909 | 0,000500415 | 0,025276494 |
| EGR2     | -1,877937925 | 5,69508922  | 0,00050882  | 0,025512062 |
| GNPNAT1  | 2,112050729  | 7,524093401 | 0,000532826 | 0,02652073  |
| C1orf198 | -1,642124045 | 6,799300089 | 0,000543833 | 0,026872457 |
| FHOD3    | 2,863887275  | 4,059716307 | 0,000548074 | 0,026887154 |
| TJPI     | -1,677413175 | 6,566333635 | 0,000555718 | 0,027067437 |
| NBEAL1   | -1,617830697 | 5,536020661 | 0,000578022 | 0,027954116 |
| C11orf9  | -2,07785671  | 4,546733254 | 0,000588812 | 0,028145503 |
| KITLG    | -1,766774248 | 5,908873427 | 0,000590234 | 0,028145503 |

|           |              |             |             |             |
|-----------|--------------|-------------|-------------|-------------|
| OAZ1      | -1,447008686 | 7,636708809 | 0,000629567 | 0,029812616 |
| MSH6      | 1,840213109  | 7,129399071 | 0,000639043 | 0,030052643 |
| ERO1L     | 2,336131211  | 7,640206522 | 0,000674985 | 0,031525486 |
| SULF1     | 2,9220627    | 7,916235852 | 0,000687643 | 0,031898211 |
| RHOB      | -2,096940587 | 9,410806366 | 0,000696381 | 0,032085279 |
| VASH1     | -1,752131909 | 6,125189745 | 0,000733643 | 0,033193086 |
| SPP1      | 3,694858892  | 8,752702194 | 0,000747276 | 0,033193086 |
| GGH       | 2,508400015  | 6,317147643 | 0,000753915 | 0,033193086 |
| PROS1     | -1,480149602 | 5,889698078 | 0,000756589 | 0,033193086 |
| CCT6A     | 1,826245103  | 8,596988318 | 0,000760699 | 0,033193086 |
| HMOX1     | -1,545845128 | 7,094074602 | 0,000761506 | 0,033193086 |
| MFSD2A    | -1,838636599 | 5,288411858 | 0,000762689 | 0,033193086 |
| SH3D19    | -1,55063992  | 8,116514929 | 0,000765012 | 0,033193086 |
| PLAU      | 2,881126642  | 6,985169183 | 0,000768689 | 0,033193086 |
| MED10     | 1,919443367  | 4,1198774   | 0,000771939 | 0,033193086 |
| SPAG5     | 2,3674237    | 5,782532003 | 0,00077397  | 0,033193086 |
| KPNA2     | 2,041333957  | 9,289835257 | 0,000796353 | 0,033939564 |
| RECK      | -1,418610047 | 3,855958754 | 0,000809052 | 0,033978703 |
| MIDN      | -1,827228996 | 4,675150954 | 0,000809405 | 0,033978703 |
| AES       | -1,450704795 | 8,498901794 | 0,00081222  | 0,033978703 |
| F11R      | -1,672217892 | 7,511855344 | 0,000825181 | 0,034310438 |
| ACO1      | -1,528572035 | 5,649561618 | 0,000842237 | 0,034807377 |
| ENPP2     | -1,667531343 | 6,811714381 | 0,000855486 | 0,035048073 |
| MASTL     | 1,67712948   | 5,209689817 | 0,000862547 | 0,035048073 |
| PIAS1     | -1,21560856  | 6,183016639 | 0,000866702 | 0,035048073 |
| LITAF     | -1,5093139   | 6,766436145 | 0,000868621 | 0,035048073 |
| NCAPG2    | 1,901550968  | 6,438376496 | 0,00087765  | 0,035071339 |
| NAA20     | 1,784922649  | 7,689982851 | 0,000879484 | 0,035071339 |
| SNRK      | -1,317033411 | 5,372652347 | 0,000890947 | 0,035321905 |
| ETS2      | -1,50782664  | 7,753356775 | 0,000899095 | 0,035324556 |
| RGS5      | -2,030053248 | 6,814924918 | 0,000901459 | 0,035324556 |
| EMP1      | -1,822897708 | 7,460106006 | 0,000906555 | 0,035324556 |
| PALB2     | 2,183267968  | 5,38660206  | 0,000928753 | 0,035983893 |
| HERPUD1   | -1,433264155 | 7,766393143 | 0,000937648 | 0,036081676 |
| PSMD7     | 1,636200543  | 7,184200875 | 0,000941859 | 0,036081676 |
| PNPLA2    | -1,404322069 | 6,308838524 | 0,000948188 | 0,036121203 |
| ERI2      | 1,942023516  | 4,691661748 | 0,000962505 | 0,036462896 |
| RAB11FIP1 | -1,612735499 | 7,172723452 | 0,000974248 | 0,036676574 |
| FAM162A   | 1,689597327  | 7,155223764 | 0,000978903 | 0,036676574 |
| GAPDH     | 2,130086352  | 13,04327338 | 0,00102332  | 0,038131253 |
| TSPAN4    | -1,361829108 | 5,031232799 | 0,001052994 | 0,0387519   |
| SEMA3F    | -1,886474284 | 4,779403598 | 0,001053086 | 0,0387519   |
| RBMS3     | -1,663698583 | 5,350599067 | 0,001057025 | 0,0387519   |
| PLOD2     | 2,290990624  | 8,069412171 | 0,001064795 | 0,038828004 |
| BAZ2B     | -1,425465856 | 5,020917638 | 0,001079593 | 0,038868326 |
| DNAJC9    | 1,677664387  | 5,837684846 | 0,001085499 | 0,038868326 |
| FOXO1     | -1,460653318 | 6,020890396 | 0,001086831 | 0,038868326 |
| CENPH     | 2,303916102  | 4,423011723 | 0,001089306 | 0,038868326 |
| RAD23B    | 1,625745638  | 7,967212072 | 0,001095678 | 0,038868326 |
| FANCI     | 2,239959833  | 4,275438434 | 0,001105227 | 0,038868326 |

|          |              |             |             |             |
|----------|--------------|-------------|-------------|-------------|
| CCT4     | 1,897427071  | 9,317884464 | 0,001107145 | 0,038868326 |
| KIAA0247 | -1,311838314 | 6,69289926  | 0,001111501 | 0,038868326 |
| TBL1XR1  | 1,691612175  | 8,542664924 | 0,0011484   | 0,039820407 |
| SLMAP    | 2,23885055   | 6,407165732 | 0,001150406 | 0,039820407 |
| TAOK2    | -1,45016247  | 5,265809665 | 0,001161834 | 0,039893723 |
| ARRB2    | -1,185510237 | 7,063073519 | 0,001164225 | 0,039893723 |
| CDK1     | 2,237886564  | 6,601449654 | 0,001195235 | 0,04075154  |
| SNHG1    | 1,971086704  | 6,673796187 | 0,001245216 | 0,04206039  |
| RACGAP1  | 1,911084     | 6,665107468 | 0,001247273 | 0,04206039  |
| LDHA     | 2,064720579  | 10,42710335 | 0,001263066 | 0,04206039  |
| PAICS    | 2,108608592  | 5,993675805 | 0,001263486 | 0,04206039  |
| C2       | -1,513516932 | 6,429946868 | 0,001270312 | 0,04206039  |
| LPCAT1   | -1,432053083 | 8,43788918  | 0,001275447 | 0,04206039  |
| DNAJC7   | 1,763441088  | 7,599952881 | 0,0012768   | 0,04206039  |
| CNN2     | -1,450573272 | 7,830968789 | 0,001283148 | 0,042066276 |
| GRN      | -1,304249677 | 9,450403152 | 0,001303884 | 0,042541551 |
| SNX30    | -1,460367511 | 5,956755002 | 0,001320551 | 0,042880187 |
| RNASEH1  | 1,782851454  | 5,956207548 | 0,001331566 | 0,043032918 |
| DCBLD2   | 3,82795288   | 8,061624091 | 0,001354755 | 0,043575833 |
| DTYMK    | 1,639093525  | 5,686838943 | 0,001393435 | 0,044609558 |
| ENO2     | 2,136830916  | 7,61281086  | 0,001411307 | 0,044906893 |
| DSG2     | 2,749704414  | 7,139012729 | 0,001415894 | 0,044906893 |
| POLR2H   | 1,769661641  | 7,13302314  | 0,001488797 | 0,047000489 |
| RPS6KA5  | -1,599750605 | 3,606058354 | 0,001510749 | 0,047060825 |
| MRPS22   | 2,250503199  | 6,414467425 | 0,001511122 | 0,047060825 |
| ABLIM1   | -1,508031915 | 5,030102288 | 0,001511412 | 0,047060825 |
| HLA-DPB1 | -1,684441441 | 8,34076537  | 0,00152354  | 0,047222815 |
| C10orf11 | -1,281725971 | 4,662174216 | 0,001541468 | 0,04756232  |
| SNRPE    | 1,90384331   | 8,471979104 | 0,001579416 | 0,04831116  |
| NFATC3   | -1,343336161 | 7,002686279 | 0,001579907 | 0,04831116  |
| HSD17B4  | -1,309351478 | 6,292559701 | 0,001601108 | 0,048740866 |
| MCM4     | 2,966665313  | 7,663777461 | 0,001609189 | 0,048769142 |
| SNRPA1   | 1,571478656  | 7,733868234 | 0,001640219 | 0,049489626 |
| MAPK3    | -1,149347614 | 6,716725158 | 0,001655565 | 0,049591796 |
| PARL     | 1,622688307  | 6,513554461 | 0,001658151 | 0,049591796 |
| SLC25A38 | -1,367209034 | 4,638828925 | 0,00166724  | 0,049645881 |
| RIN3     | -1,40782119  | 5,750618024 | 0,001729136 | 0,051157868 |
| SLC16A3  | 1,660961103  | 7,602711804 | 0,001733021 | 0,051157868 |
| KIAA0101 | 2,356465063  | 6,012064151 | 0,001755488 | 0,051592939 |
| PAPD7    | 1,46571638   | 5,675345872 | 0,001762891 | 0,051592939 |
| TBX2     | -1,851351962 | 6,415553514 | 0,00179395  | 0,052277555 |
| FLI1     | -1,33188269  | 5,078178071 | 0,001814575 | 0,052653565 |
| HN1      | 1,675353278  | 7,664483986 | 0,001860082 | 0,053527125 |
| GPCPD1   | -1,341936091 | 6,386770237 | 0,00186038  | 0,053527125 |
| MPP6     | 1,699674302  | 6,012559387 | 0,00187649  | 0,053763799 |
| GOLM1    | 1,904762781  | 8,035593297 | 0,001910109 | 0,054317511 |
| MCAM     | -2,215075552 | 7,082136927 | 0,00191914  | 0,054317511 |
| ANAPC4   | -1,323432475 | 4,759098755 | 0,001919713 | 0,054317511 |
| MOAP1    | -1,184659686 | 5,366151279 | 0,001960804 | 0,055250919 |
| GLUL     | -1,346371066 | 7,444002647 | 0,001974051 | 0,055360513 |

|           |              |             |             |             |
|-----------|--------------|-------------|-------------|-------------|
| ARNTL2    | 4,371632377  | 6,834559445 | 0,001980931 | 0,055360513 |
| LOC146880 | -1,350235607 | 5,43153914  | 0,002012611 | 0,056007975 |
| CDCA5     | 2,544030588  | 4,927093195 | 0,002026152 | 0,056007975 |
| PARD6B    | -1,605812694 | 4,479744823 | 0,002028739 | 0,056007975 |
| EPB41L5   | -1,54371685  | 4,064345773 | 0,002048218 | 0,056313554 |
| QSOX1     | -1,28195022  | 7,570952261 | 0,002056324 | 0,056313554 |
| PRDX4     | 1,664796853  | 8,093306805 | 0,002095648 | 0,056967881 |
| ZWINT     | 2,239431626  | 6,363547211 | 0,002104554 | 0,056967881 |
| PLSCR4    | -1,696191832 | 6,259964774 | 0,00210528  | 0,056967881 |
| CKAP2     | 2,145051023  | 5,150953784 | 0,002155908 | 0,057814398 |
| FEZ1      | -1,491361152 | 4,988473689 | 0,002173124 | 0,057814398 |
| PRKDC     | 1,947811162  | 8,43958429  | 0,002184455 | 0,057814398 |
| TBC1D4    | -1,789447089 | 5,213559225 | 0,002184554 | 0,057814398 |
| CIRBP     | -1,280761097 | 7,912923816 | 0,002186214 | 0,057814398 |
| CDK4      | 1,704564081  | 7,528720941 | 0,002187434 | 0,057814398 |
| NOP16     | 1,60426131   | 5,906838264 | 0,002246155 | 0,058850823 |
| PDCD5     | 2,092546589  | 9,065565043 | 0,002250051 | 0,058850823 |
| MRPL11    | 1,92091279   | 6,556749352 | 0,002260969 | 0,058850823 |
| SLC15A3   | -1,463218195 | 5,733538553 | 0,00226117  | 0,058850823 |
| PTGER4    | -1,704980693 | 5,051003977 | 0,002281653 | 0,059158141 |
| RPS6KA2   | -1,69262467  | 6,152924667 | 0,002347303 | 0,060629759 |
| CCT5      | 1,672338641  | 8,874104398 | 0,002381434 | 0,061117051 |
| AK1       | -1,451441246 | 7,542912492 | 0,002384094 | 0,061117051 |
| ELF3      | -1,961249878 | 5,910792127 | 0,002395096 | 0,061169128 |
| PMAIP1    | 2,34911584   | 5,88036297  | 0,002456903 | 0,06238962  |
| ATXN1     | -1,383341741 | 4,765517937 | 0,002461183 | 0,06238962  |
| ATP11A    | -1,672292048 | 6,032085742 | 0,002486736 | 0,062803896 |
| LAGE3     | 1,757789633  | 6,849272906 | 0,00251775  | 0,063352534 |
| PCYOX1    | -1,301916758 | 5,810273077 | 0,0025313   | 0,06345931  |
| XRCC3     | 1,929762554  | 4,990542892 | 0,002555673 | 0,063835663 |
| SYNE1     | -1,739867599 | 5,587220383 | 0,002601866 | 0,064601216 |
| RPRD1A    | 1,519050476  | 6,671669442 | 0,00260527  | 0,064601216 |
| NR4A2     | -1,84463925  | 5,285186429 | 0,002622926 | 0,064803383 |
| NUP155    | 1,49413737   | 7,378115545 | 0,002693421 | 0,066304835 |
| PDCD10    | 1,785789621  | 8,058391337 | 0,002716192 | 0,066624867 |
| OLA1      | 1,631033761  | 7,214518315 | 0,00273878  | 0,066714063 |
| SAMHD1    | -1,52557759  | 6,764791148 | 0,002754405 | 0,066714063 |
| SGSM2     | -1,27662592  | 5,117364757 | 0,002758912 | 0,066714063 |
| SMC4      | 1,70658511   | 8,013273689 | 0,002766225 | 0,066714063 |
| IFI30     | -1,463668744 | 7,958873157 | 0,002777786 | 0,066714063 |
| LRBA      | -1,321943355 | 6,021812784 | 0,00277853  | 0,066714063 |
| MYO5C     | -1,788119792 | 5,74717517  | 0,002806942 | 0,067159777 |
| RAN       | 1,632077171  | 9,811115559 | 0,002844103 | 0,067810976 |
| CEP72     | 1,560972847  | 5,515009602 | 0,002882614 | 0,068489702 |
| LIPA      | -1,396725513 | 6,715584457 | 0,002911222 | 0,068841983 |
| SCNM1     | 1,315978612  | 6,020190455 | 0,002917632 | 0,068841983 |
| H1FO      | 2,617749873  | 9,504164588 | 0,002971873 | 0,069804973 |
| RFX5      | -1,259556026 | 4,506533778 | 0,002989419 | 0,069804973 |
| TWF1      | 2,056467118  | 8,252494477 | 0,002997674 | 0,069804973 |
| TBC1D9    | -1,269781272 | 5,068543835 | 0,002999392 | 0,069804973 |

|          |              |             |             |             |
|----------|--------------|-------------|-------------|-------------|
| CREBZF   | 2,163175518  | 8,522297416 | 0,003095194 | 0,071789541 |
| YWHAZ    | 1,950930667  | 6,675841946 | 0,00321071  | 0,074216386 |
| FIGNL1   | 2,151986732  | 5,39833373  | 0,003258324 | 0,075062541 |
| TNS1     | -1,905949302 | 8,79205603  | 0,003281289 | 0,075337071 |
| PLK2     | -1,405801888 | 5,876341818 | 0,003340542 | 0,076178554 |
| JUND     | -1,500564954 | 7,123006657 | 0,003342249 | 0,076178554 |
| ITM2A    | -1,858721791 | 5,414557333 | 0,003351454 | 0,076178554 |
| PFDN4    | 2,144409835  | 6,825888746 | 0,003425531 | 0,076947644 |
| WDR76    | 1,984477416  | 5,626437378 | 0,003436257 | 0,076947644 |
| PLXNA2   | -1,403071727 | 5,791955844 | 0,003436592 | 0,076947644 |
| ITGAX    | -1,278668011 | 5,173676455 | 0,003437532 | 0,076947644 |
| NCAPD2   | 2,189424421  | 7,189691891 | 0,003441712 | 0,076947644 |
| PMEPA1   | 2,134900555  | 7,559835103 | 0,00346953  | 0,077316099 |
| PPP1R14B | 1,761947326  | 8,667456567 | 0,00350098  | 0,077627259 |
| C5orf43  | 1,567070265  | 6,815518208 | 0,003513331 | 0,077627259 |
| APP      | -1,155798882 | 8,162452193 | 0,003517645 | 0,077627259 |
| DSP      | 2,330432196  | 7,284783916 | 0,003554386 | 0,078185022 |
| GAB1     | -1,561935836 | 6,700621605 | 0,003617459 | 0,079316567 |
| NAA38    | 2,170202559  | 7,639342475 | 0,003629445 | 0,079324318 |
| MRPS23   | 1,603327382  | 6,061307971 | 0,00364538  | 0,079418033 |
| RGL1     | -1,188514198 | 5,496565848 | 0,003669983 | 0,079506661 |
| A2M      | -2,150199429 | 10,67432295 | 0,003672767 | 0,079506661 |
| N4BP2L1  | -1,502210439 | 4,004258085 | 0,003687591 | 0,079574948 |
| DEK      | 2,350197846  | 9,115554796 | 0,003721052 | 0,079863675 |
| RAB10    | 1,519569967  | 8,217301907 | 0,003727211 | 0,079863675 |
| UBE2V2   | 1,573317563  | 7,307931349 | 0,003736107 | 0,079863675 |
| C5orf34  | 1,962385203  | 3,887607609 | 0,003770129 | 0,080339094 |
| LAPTM5   | -1,520584506 | 8,590745251 | 0,003851476 | 0,081551819 |
| IGFBP3   | 2,720935106  | 8,2356136   | 0,003851896 | 0,081551819 |
| SMG1     | 1,416075671  | 7,183008503 | 0,003862918 | 0,081551819 |
| NAA50    | 1,454544206  | 7,448417773 | 0,003897679 | 0,08203171  |
| SFN      | 2,856399775  | 7,795560994 | 0,003979937 | 0,083505205 |
| RASL12   | -1,922066908 | 5,276251628 | 0,004031907 | 0,084336111 |
| DOCK4    | -1,371100381 | 5,689230626 | 0,004200509 | 0,087594111 |
| PTK2B    | -1,268772175 | 6,347841826 | 0,004216804 | 0,087665813 |
| GABARAP  | -1,313538893 | 8,072599575 | 0,004281114 | 0,088732278 |
| DPY19L1  | 2,313349121  | 7,431086089 | 0,004325654 | 0,089383747 |
| YKT6     | 1,382430849  | 7,526366131 | 0,004341543 | 0,089441024 |
| RPAP3    | 1,376199027  | 6,322283109 | 0,004357652 | 0,089502493 |
| PFN2     | 1,840759555  | 6,759109329 | 0,004383366 | 0,08963506  |
| ZNF503   | -1,297283981 | 5,082614382 | 0,00439203  | 0,08963506  |
| FOXF2    | -1,581819068 | 5,246583256 | 0,004403541 | 0,08963506  |
| TMEM9B   | -1,1496596   | 5,579871924 | 0,004422614 | 0,089755374 |
| ITGAL    | -1,400044712 | 5,7504971   | 0,004515714 | 0,091372859 |
| OCIAD2   | 2,389911783  | 6,985258807 | 0,004530017 | 0,091391083 |
| LYZ      | -1,634715127 | 10,02192051 | 0,004578345 | 0,09209361  |
| SPHK1    | 2,164266465  | 6,411744507 | 0,004611195 | 0,092481575 |
| SRPK2    | 1,258181485  | 5,59319132  | 0,004627727 | 0,092540961 |
| CYBASC3  | -1,132793246 | 5,566368862 | 0,004681677 | 0,093050253 |
| GPR180   | 1,526606173  | 5,422949189 | 0,004682651 | 0,093050253 |



|          |              |             |             |             |
|----------|--------------|-------------|-------------|-------------|
| SIGIRR   | -1,384177555 | 5,033702466 | 0,004700201 | 0,093050253 |
| SLC6A8   | 3,024948284  | 6,960149128 | 0,004721068 | 0,093050253 |
| NXF1     | -1,358593463 | 6,031491822 | 0,004721424 | 0,093050253 |
| RPL36A   | 1,700683756  | 10,99980773 | 0,004830479 | 0,094925186 |
| S100A2   | 4,604533293  | 8,773172682 | 0,004887875 | 0,095775914 |
| BRMS1    | 1,594941092  | 6,608328045 | 0,00490707  | 0,095775914 |
| SHROOM4  | -1,660098867 | 5,145632965 | 0,004916427 | 0,095775914 |
| ACP1     | 1,420463261  | 6,654608334 | 0,004929952 | 0,095775914 |
| COMMD5   | 1,91223      | 3,305339204 | 0,005051023 | 0,097849221 |
| TIMP3    | -1,626194852 | 8,434414629 | 0,005088361 | 0,098135276 |
| ZNF271   | 1,344739321  | 5,400118563 | 0,005094572 | 0,098135276 |
| MYBL2    | 2,227118437  | 5,86451989  | 0,005257143 | 0,100725638 |
| IFT74    | -1,174815685 | 5,258282016 | 0,00525859  | 0,100725638 |
| EXOC6    | -1,069139936 | 5,399246045 | 0,005285827 | 0,100963737 |
| ATP6V0D1 | -1,187415917 | 6,117619441 | 0,005334588 | 0,101610491 |
| FAM188B  | -1,582851252 | 5,132092246 | 0,005379355 | 0,102177779 |
| PREX1    | -1,557076263 | 4,560660043 | 0,005402446 | 0,102331331 |
| MYO1F    | -1,197170693 | 5,642163081 | 0,005447041 | 0,102816877 |
| ELOVL6   | 1,913685131  | 4,74548987  | 0,005466275 | 0,102816877 |
| B4GALT2  | 1,761571761  | 7,299092666 | 0,005473314 | 0,102816877 |
| CD81     | -1,309552586 | 8,19945864  | 0,005521434 | 0,103161413 |
| AHCYL2   | -1,610590663 | 5,771774883 | 0,005521912 | 0,103161413 |
| ITGB2    | -1,356838806 | 5,976923523 | 0,005573953 | 0,103849142 |
| CENPQ    | 2,594683558  | 4,859588359 | 0,005621239 | 0,104444763 |
| C7orf23  | -1,179507008 | 4,60244734  | 0,00573324  | 0,106006418 |
| PRMT5    | 1,401841582  | 7,044744618 | 0,005736379 | 0,106006418 |
| SKI      | -1,411038852 | 5,915555181 | 0,005768669 | 0,106315017 |
| NPL      | -1,277289641 | 5,04751518  | 0,005801536 | 0,106456697 |
| BOP1     | 2,248140026  | 7,067144379 | 0,005820939 | 0,106456697 |
| MYO1B    | -1,142061115 | 7,163225417 | 0,005823192 | 0,106456697 |
| H2AFX    | 1,901163748  | 7,403414507 | 0,005853647 | 0,10672732  |
| EHD2     | -1,381155575 | 6,757121361 | 0,005875477 | 0,106761277 |
| MAP3K5   | -1,066058789 | 5,906148281 | 0,005886822 | 0,106761277 |
| SCNN1A   | -1,692647302 | 5,784130503 | 0,005924645 | 0,106762883 |
| CISH     | -1,394422394 | 5,155466695 | 0,005928039 | 0,106762883 |
| HSPA4L   | 2,188686905  | 4,62482484  | 0,005935863 | 0,106762883 |
| CYBRD1   | -1,523064765 | 7,787468478 | 0,005953338 | 0,106762883 |
| TAF13    | 1,354760032  | 6,218334147 | 0,005965194 | 0,106762883 |
| CCL2     | -1,428815054 | 8,576236627 | 0,00610073  | 0,108594622 |
| EIF5B    | 1,474688104  | 7,731483082 | 0,006113966 | 0,108594622 |
| MRPL47   | 1,736522552  | 7,021727526 | 0,006115315 | 0,108594622 |
| SHFM1    | 1,525366453  | 9,709798167 | 0,00615067  | 0,108880432 |
| NT5C3    | 1,452377548  | 5,562727267 | 0,006185985 | 0,108880432 |
| IQGAP2   | -1,197791986 | 4,27548927  | 0,006192582 | 0,108880432 |
| USP5     | 2,129728638  | 9,020462579 | 0,006195279 | 0,108880432 |
| SNHG4    | 1,839126374  | 6,132167327 | 0,006252365 | 0,109601219 |
| ZZEF1    | -1,090909867 | 4,362353186 | 0,006273286 | 0,109685985 |
| KIF18A   | 1,988166683  | 4,520729012 | 0,006338477 | 0,110540835 |
| INPP4B   | -1,171150155 | 2,92911959  | 0,006354599 | 0,110540835 |
| SPTAN1   | -1,22438216  | 7,535094621 | 0,006389549 | 0,110615143 |

|           |              |             |             |             |
|-----------|--------------|-------------|-------------|-------------|
| C11orf54  | -1,342073688 | 4,471752269 | 0,006391313 | 0,110615143 |
| TBC1D23   | 1,504986523  | 6,658352447 | 0,006411924 | 0,110690914 |
| SORD      | 1,434735661  | 4,374132638 | 0,006492603 | 0,111800659 |
| CCT2      | 1,494304455  | 7,461685847 | 0,006599719 | 0,113358904 |
| PSMD12    | 1,215794289  | 6,209661603 | 0,006649501 | 0,113926995 |
| CTHRC1    | 1,762038005  | 7,259218601 | 0,006684569 | 0,114240784 |
| MRTO4     | 1,413121226  | 6,200875694 | 0,006740134 | 0,114902427 |
| MARS2     | 1,69883451   | 4,06190116  | 0,006761055 | 0,11497165  |
| MTDH      | 1,449247772  | 8,799791489 | 0,00678015  | 0,115009561 |
| GYPC      | -1,54220982  | 6,193526771 | 0,006890624 | 0,116593456 |
| USP14     | 1,216549358  | 6,85435031  | 0,006947878 | 0,11721733  |
| UCK2      | 1,425820161  | 6,07708075  | 0,006961874 | 0,11721733  |
| COBLL1    | -1,132627847 | 5,423912976 | 0,006995585 | 0,117303389 |
| NPM3      | 1,676502061  | 5,648568551 | 0,007024503 | 0,117303389 |
| C15orf23  | 1,586955923  | 4,811685226 | 0,007028779 | 0,117303389 |
| MAGOHB    | 1,46699106   | 5,557589648 | 0,007035795 | 0,117303389 |
| DCLRE1A   | 2,039006308  | 4,721203274 | 0,007089443 | 0,117909538 |
| CHST3     | 1,460582416  | 6,032762517 | 0,007112723 | 0,118008892 |
| LOC728554 | 2,046586388  | 7,380970171 | 0,007134364 | 0,118080655 |
| PHTF1     | 1,887706949  | 5,144458176 | 0,007161674 | 0,118245655 |
| CYBB      | -1,3687273   | 7,405831922 | 0,00720767  | 0,118717633 |
| MTRF1L    | 1,495443354  | 5,497321969 | 0,007270118 | 0,119337497 |
| NFKBIA    | -1,16816417  | 7,890230531 | 0,007280305 | 0,119337497 |
| PDGFC     | 1,675148033  | 6,722552189 | 0,007367816 | 0,120409463 |
| BTG1      | -1,210304592 | 8,388319179 | 0,007381017 | 0,120409463 |
| UQCRHL    | 1,592899594  | 5,334337919 | 0,007398894 | 0,120413019 |
| FCGRT     | -1,196090574 | 6,331113363 | 0,007448738 | 0,120935585 |
| IPO7      | 1,333452021  | 7,752888071 | 0,007471334 | 0,121014312 |
| UTP6      | 1,316928823  | 6,672925971 | 0,007512055 | 0,121385549 |
| STAT5A    | -1,171436485 | 4,796088272 | 0,007573631 | 0,12173422  |
| CCDC58    | 1,694515578  | 5,078013745 | 0,007584991 | 0,12173422  |
| ANKRD44   | -1,371888415 | 4,528878262 | 0,007587189 | 0,12173422  |
| PRKD2     | -1,054531594 | 6,386587207 | 0,007635987 | 0,121989233 |
| KAT2B     | -1,260242666 | 4,869383014 | 0,007645568 | 0,121989233 |
| RAB22A    | 1,425925251  | 7,913459612 | 0,007656752 | 0,121989233 |
| RSPRY1    | 1,399064934  | 5,391982934 | 0,007728988 | 0,122846181 |
| BMS1      | 1,373109739  | 6,429448178 | 0,007751257 | 0,122846181 |
| PDSS1     | 1,345128554  | 4,149687501 | 0,007771268 | 0,122846181 |
| FKBP4     | 1,351027363  | 7,294710369 | 0,0077826   | 0,122846181 |
| LOC388796 | 1,259675691  | 4,918330874 | 0,007822361 | 0,123172319 |
| SNX29     | -1,195932443 | 6,117942186 | 0,007851743 | 0,123172319 |
| NQO1      | 2,950101957  | 7,345705541 | 0,007857451 | 0,123172319 |
| TOPBP1    | 1,88638019   | 6,935059989 | 0,007882281 | 0,123278147 |
| SERINC5   | -1,382695442 | 6,308531196 | 0,00795185  | 0,12382462  |
| DOCK11    | -1,251881571 | 4,775547339 | 0,007953539 | 0,12382462  |
| ZC3H15    | 1,4243903    | 6,82474273  | 0,008026074 | 0,124378131 |
| PDIA6     | 1,231238295  | 9,102253975 | 0,008037869 | 0,124378131 |
| BNIP3     | 1,746887365  | 6,896971464 | 0,008045705 | 0,124378131 |
| MDK       | 2,786181511  | 9,541074296 | 0,008106246 | 0,124378131 |
| YPEL3     | -1,173416767 | 7,615722811 | 0,00810862  | 0,124378131 |

|          |              |             |             |             |
|----------|--------------|-------------|-------------|-------------|
| ITPKC    | -1,186045276 | 4,664385215 | 0,008141718 | 0,124378131 |
| PABPC3   | 1,833003532  | 6,782107797 | 0,008170838 | 0,124378131 |
| GARS     | 1,572117376  | 6,998557171 | 0,008176749 | 0,124378131 |
| MRPL33   | 1,530735758  | 7,331717974 | 0,008181741 | 0,124378131 |
| PFDN2    | 1,444701632  | 7,641718772 | 0,008191272 | 0,124378131 |
| AHNAK2   | 2,402944337  | 6,360180688 | 0,008198498 | 0,124378131 |
| TGFBI    | 1,789659458  | 8,647317004 | 0,008207972 | 0,124378131 |
| EIF4EBP1 | 2,030025443  | 7,445321752 | 0,008251656 | 0,124762847 |
| C10orf10 | -1,880917435 | 8,056541137 | 0,008387534 | 0,126536711 |
| RPL7     | 1,432579764  | 11,89077879 | 0,008434492 | 0,126623896 |
| GPC1     | 2,49727765   | 7,679484558 | 0,008449386 | 0,126623896 |
| RANBP1   | 1,668991448  | 6,985105467 | 0,008456212 | 0,126623896 |
| ZNF259   | 1,689491844  | 4,420055978 | 0,00846759  | 0,126623896 |
| KPNA4    | 1,398307446  | 7,751993617 | 0,008503677 | 0,126804203 |
| TP53INP1 | -1,224706722 | 4,370051077 | 0,008516839 | 0,126804203 |
| CTNND1   | -1,133181742 | 4,93339993  | 0,00857643  | 0,127413238 |
| KIAA1524 | 1,654536762  | 3,995778766 | 0,008694656 | 0,128888823 |
| E2F3     | 1,817080256  | 6,044635245 | 0,008992227 | 0,1327531   |
| METTL5   | 1,468359692  | 6,695493811 | 0,008996203 | 0,1327531   |
| DHRS7B   | -1,273674535 | 4,696170251 | 0,009034064 | 0,1327531   |
| APOE     | -1,366524864 | 10,10140034 | 0,009034851 | 0,1327531   |
| TSPYL1   | -1,018967092 | 6,845845458 | 0,009064131 | 0,1327531   |
| ANAPC2   | -1,255795202 | 3,86731793  | 0,009072143 | 0,1327531   |
| ARHGAP17 | -0,992176442 | 7,287693826 | 0,009104999 | 0,132948579 |
| PHLDA1   | 2,030537481  | 10,67461219 | 0,009145429 | 0,133253586 |
| CACYBP   | 1,73142      | 7,1697077   | 0,009166319 | 0,133273197 |
| FN1      | 1,89690615   | 9,035145094 | 0,009230041 | 0,133914155 |
| ERGIC2   | 1,23957739   | 7,812347561 | 0,009324516 | 0,134997611 |
| DVL1     | 1,982840878  | 7,296909242 | 0,009363161 | 0,13526991  |
| MRPL39   | 1,497356696  | 6,802784707 | 0,009454062 | 0,136294393 |
| IGFBP7   | -1,705817509 | 8,160747298 | 0,009486937 | 0,136340113 |
| PINK1    | -1,254310444 | 4,865492724 | 0,009497222 | 0,136340113 |
| ZNF639   | 1,419996425  | 7,533314427 | 0,009579995 | 0,137239469 |
| CD82     | -1,365539133 | 5,78620682  | 0,009602142 | 0,137268354 |
| GCLM     | 2,368252286  | 7,420477308 | 0,009654756 | 0,137731759 |
| PIP4K2C  | 1,175329436  | 5,844220025 | 0,009696731 | 0,138041772 |
| LYPLA1   | 1,605474775  | 8,946774725 | 0,009725243 | 0,138159239 |
| TNFRSF14 | -1,179819792 | 5,759958266 | 0,00989335  | 0,140072298 |
| BBS9     | -1,050403619 | 5,29754647  | 0,00990099  | 0,140072298 |
| ATIC     | 1,242723688  | 7,810164055 | 0,009978627 | 0,140878381 |
| DDX5     | -1,154932569 | 8,911652736 | 0,010032867 | 0,141351493 |
| UBXN7    | 1,285840514  | 6,394263353 | 0,010221147 | 0,143707224 |
| TSPAN13  | -1,450589067 | 6,910807297 | 0,010273254 | 0,144142638 |
| CBX3     | 1,653972229  | 8,059146931 | 0,010379282 | 0,145331257 |
| WDR12    | 1,393944933  | 5,633251909 | 0,010458429 | 0,146139398 |
| RAD1     | 1,158218553  | 6,558467202 | 0,010548803 | 0,146927489 |
| CTGF     | -1,418966672 | 8,508818745 | 0,010560773 | 0,146927489 |
| EDEM1    | -1,060112647 | 6,617253508 | 0,01059729  | 0,146927489 |
| CTSD     | -1,263505646 | 10,19776182 | 0,010601015 | 0,146927489 |
| AASDHPPT | 1,705728323  | 5,786616216 | 0,010648513 | 0,147286431 |

|           |              |             |             |             |
|-----------|--------------|-------------|-------------|-------------|
| TUBA1C    | 1,896695019  | 11,65166431 | 0,010706912 | 0,147794395 |
| CWC15     | 1,402494857  | 7,510732233 | 0,010797847 | 0,148715723 |
| MEA1      | 1,371823666  | 7,7501312   | 0,010817275 | 0,148715723 |
| ATP9B     | -1,071562397 | 4,855599273 | 0,010935499 | 0,15003857  |
| UGDH      | 2,057546727  | 7,23979311  | 0,011063215 | 0,151272374 |
| SLC7A1    | 1,569525009  | 5,493424188 | 0,011069792 | 0,151272374 |
| PSMC2     | 1,137189073  | 6,355456868 | 0,011124856 | 0,151420744 |
| GMPS      | 1,528904234  | 7,387892649 | 0,011125061 | 0,151420744 |
| THOC3     | 1,710903903  | 6,20906403  | 0,011191555 | 0,151947776 |
| PBRM1     | -1,10509621  | 6,18046177  | 0,011208349 | 0,151947776 |
| ZEB2      | -1,141170735 | 6,217843993 | 0,011241181 | 0,152090505 |
| STXBP1    | -1,182528047 | 5,492393964 | 0,01127396  | 0,152231954 |
| DDIT4     | 1,929366417  | 9,640423588 | 0,011324123 | 0,15260711  |
| NBEAL2    | -0,977418513 | 7,353772971 | 0,011346802 | 0,152611125 |
| FBXO5     | 1,347078265  | 4,751148824 | 0,011491095 | 0,154173084 |
| BTBD10    | 1,437839561  | 5,714939465 | 0,011525425 | 0,154173084 |
| PSMC6     | 1,379737851  | 8,20326046  | 0,011530763 | 0,154173084 |
| MTFR1     | 1,567982658  | 5,166095792 | 0,01161539  | 0,155000676 |
| LOC152217 | 1,356686187  | 6,848851152 | 0,011684193 | 0,155267359 |
| ALDH9A1   | -0,985189765 | 5,967961743 | 0,011706201 | 0,155267359 |
| MED13L    | -0,998959872 | 6,586981737 | 0,011723757 | 0,155267359 |
| GPR183    | -1,18435027  | 5,100463147 | 0,011726454 | 0,155267359 |
| XBP1      | -1,293500957 | 8,019834587 | 0,011798017 | 0,155912168 |
| GNL3      | 1,325967069  | 6,139666465 | 0,011840204 | 0,156152702 |
| ABCA1     | -1,043249428 | 6,291195455 | 0,011862018 | 0,156152702 |
| TSC22D1   | -1,083162776 | 6,96430241  | 0,012005608 | 0,157700596 |
| TOMM34    | 1,359091446  | 6,04635009  | 0,012025856 | 0,157700596 |
| METTL2A   | 1,243667358  | 4,738813452 | 0,012226124 | 0,159939202 |
| PPID      | 1,385743215  | 5,925140995 | 0,0122497   | 0,159939202 |
| HMGB3     | 1,848297128  | 6,837132738 | 0,012266931 | 0,159939202 |
| PPP3R1    | 1,064491488  | 7,698997242 | 0,012378824 | 0,161090078 |
| IL4I1     | 1,908408815  | 4,954221405 | 0,012539856 | 0,162874817 |
| TCEB1     | 1,196470345  | 7,894323717 | 0,012573352 | 0,1629994   |
| CKS2      | 1,516572791  | 6,330435672 | 0,012730959 | 0,164729426 |
| PION      | -1,41048505  | 6,542435628 | 0,012840842 | 0,16554782  |
| KCMF1     | 1,08500968   | 6,328204232 | 0,012842762 | 0,16554782  |
| ZFP1      | 1,571782404  | 5,171053294 | 0,012947112 | 0,166578028 |
| EIF3E     | 1,490153233  | 9,792187962 | 0,012987403 | 0,166723649 |
| GTF2IRD2B | -1,061064754 | 5,556436728 | 0,01300733  | 0,166723649 |
| TYROBP    | -1,288992486 | 9,444969762 | 0,013048596 | 0,16693879  |
| HIC2      | 2,493162202  | 5,445306548 | 0,01314189  | 0,167534727 |
| OGFOD1    | 1,328178987  | 5,83632498  | 0,013144314 | 0,167534727 |
| PIIF      | 1,37573966   | 7,076434007 | 0,013181596 | 0,167696458 |
| RPGR      | -0,922958025 | 3,730524326 | 0,013245722 | 0,168067364 |
| FAM109B   | 1,430501511  | 5,582874831 | 0,013265215 | 0,168067364 |
| MAPK6     | 1,21432088   | 5,797721577 | 0,013292258 | 0,168067364 |
| PPP2R5E   | 1,304590691  | 6,914997865 | 0,013309338 | 0,168067364 |
| STAT3     | -1,063628328 | 7,420130924 | 0,013432237 | 0,16915029  |
| ZNF789    | 1,677877121  | 5,575188146 | 0,013460577 | 0,16915029  |
| ARHGAP15  | -1,492356025 | 5,306899009 | 0,013470313 | 0,16915029  |

|          |              |             |             |             |
|----------|--------------|-------------|-------------|-------------|
| NFIX     | -1,25763967  | 6,232668755 | 0,013494319 | 0,16915029  |
| WDR43    | 1,43538875   | 6,430511935 | 0,013547775 | 0,169212988 |
| C12orf75 | 1,50243694   | 7,255596247 | 0,01354895  | 0,169212988 |
| TLK2     | -0,996080829 | 7,189180857 | 0,013597044 | 0,169356566 |
| CRIM1    | -1,340852239 | 7,741593528 | 0,013610119 | 0,169356566 |
| PFDN6    | 1,588606749  | 5,377978172 | 0,013644681 | 0,169477375 |
| H1FX     | -1,095819966 | 7,124820208 | 0,013748816 | 0,170460324 |
| ANKHD1   | -0,960670656 | 5,555172479 | 0,013933526 | 0,172349999 |
| SDCBP    | -1,242904286 | 6,374911456 | 0,013951782 | 0,172349999 |
| PLEKHM1  | -1,019092539 | 7,244191813 | 0,013999785 | 0,172630261 |
| TAF1A    | 1,458054154  | 4,937755877 | 0,014171093 | 0,174427228 |
| MSH2     | 1,482221273  | 6,814291578 | 0,014245656 | 0,174541834 |
| MYO19    | 1,336493593  | 5,405653814 | 0,014273281 | 0,174541834 |
| GOLGA5   | 1,108101905  | 5,903884996 | 0,014281972 | 0,174541834 |
| IFITM2   | -1,201360781 | 8,118121262 | 0,014303217 | 0,174541834 |
| SOX9     | 1,971912231  | 4,25599891  | 0,014308386 | 0,174541834 |
| HELLS    | 1,751403171  | 4,270751933 | 0,014378465 | 0,175083486 |
| CD33     | -1,266489695 | 4,280062588 | 0,014474444 | 0,175938028 |
| DDX54    | 1,289210329  | 6,777735031 | 0,014586224 | 0,176902579 |
| NT5E     | 2,978823446  | 6,547094946 | 0,014605683 | 0,176902579 |
| LMO7     | -1,26582414  | 6,697652745 | 0,014719616 | 0,17741049  |
| ST6GAL1  | -1,11884538  | 6,354928083 | 0,014745121 | 0,17741049  |
| SLC44A2  | -1,236892924 | 5,40494616  | 0,01475587  | 0,17741049  |
| TRMT2A   | 1,572824983  | 6,161725275 | 0,014759477 | 0,17741049  |
| SGOL2    | 1,704614427  | 5,294288352 | 0,014780865 | 0,17741049  |
| SVIL     | -1,339287353 | 5,976586525 | 0,01480372  | 0,17741049  |
| FAM122A  | -1,195475257 | 6,652483092 | 0,014891407 | 0,178011958 |
| DNM1     | 1,96223901   | 5,923322154 | 0,014906119 | 0,178011958 |
| NFKBIZ   | -1,000143808 | 6,920196608 | 0,015036026 | 0,179249408 |
| POLA2    | 1,395544788  | 5,492682502 | 0,015203684 | 0,180931799 |
| DNAJC2   | 1,419336551  | 3,793500224 | 0,015310321 | 0,181709694 |
| PTPN6    | -1,019188091 | 6,348894245 | 0,015325015 | 0,181709694 |
| ADARB1   | -1,297065874 | 3,976271724 | 0,015348993 | 0,181709694 |
| SET      | 1,263700826  | 9,671097893 | 0,015377602 | 0,181732872 |
| RUNX2    | 1,684583332  | 6,246741042 | 0,015441737 | 0,181944679 |
| PAK1IP1  | 1,661060994  | 6,610033418 | 0,015448888 | 0,181944679 |
| HK3      | -1,385753352 | 5,248210338 | 0,015541306 | 0,182414877 |
| MRPL36   | 1,498162405  | 6,613890824 | 0,015542315 | 0,182414877 |
| LDB1     | -1,414969425 | 6,111580428 | 0,015629243 | 0,183119949 |
| EVL      | -1,161546003 | 6,76839194  | 0,015755688 | 0,184284794 |
| CHUK     | 1,679523131  | 5,725937726 | 0,015994561 | 0,186643673 |
| SLC33A1  | 1,104635396  | 5,725554062 | 0,016012106 | 0,186643673 |
| UBA2     | 1,745431556  | 8,616058101 | 0,016059297 | 0,186874316 |
| PARVG    | -1,174699174 | 4,692762511 | 0,016276417 | 0,189078175 |
| FAM3C    | 2,070319942  | 8,510204962 | 0,016308298 | 0,189126335 |
| NUFIP1   | 1,264738411  | 3,556981822 | 0,016576401 | 0,191792405 |
| PAWR     | 1,385553409  | 5,715905166 | 0,016617556 | 0,191792405 |
| XPO5     | 1,400411217  | 5,582210221 | 0,016622571 | 0,191792405 |
| RABGGTB  | 1,177705535  | 7,406036842 | 0,016662219 | 0,191925117 |
| TDRD3    | -1,107554994 | 5,482568932 | 0,01671656  | 0,19222635  |

|          |              |             |             |             |
|----------|--------------|-------------|-------------|-------------|
| MACF1    | -1,071586355 | 9,10606679  | 0,016754296 | 0,19233593  |
| C11orf24 | 1,150779357  | 6,792584247 | 0,016803181 | 0,192572926 |
| DARS     | 1,106738091  | 7,127272619 | 0,016893269 | 0,192746672 |
| PSMD14   | 1,154987199  | 5,898857438 | 0,016913616 | 0,192746672 |
| VMA21    | 1,249351328  | 7,170821998 | 0,016915742 | 0,192746672 |
| NT5DC3   | 1,427187959  | 5,348475051 | 0,016937898 | 0,192746672 |
| RMI1     | 1,267832761  | 3,641252202 | 0,016959672 | 0,192746672 |
| DAPK1    | -1,463780313 | 6,820800993 | 0,017089005 | 0,193893388 |
| TARS     | 1,351063137  | 6,926350575 | 0,017173306 | 0,194526198 |
| NUSAP1   | 1,587446485  | 5,405417768 | 0,017268714 | 0,19489101  |
| NPM1     | 1,355811915  | 10,22488598 | 0,01731162  | 0,19489101  |
| ARHGEF6  | -1,143714687 | 4,137112219 | 0,017316201 | 0,19489101  |
| SRP72    | 1,260905587  | 7,035933424 | 0,017319835 | 0,19489101  |
| PMP22    | -1,201225063 | 8,484643585 | 0,017428004 | 0,195785108 |
| LDLR     | -1,223339023 | 6,338489163 | 0,017554373 | 0,196880377 |
| ZNF107   | 1,518816291  | 4,94359848  | 0,017623817 | 0,197205162 |
| PAK1     | 1,295925702  | 7,491951291 | 0,017641172 | 0,197205162 |
| KNTC1    | 1,731919436  | 6,96506177  | 0,017702902 | 0,197571343 |
| ZDHHC3   | -1,013945074 | 3,961241699 | 0,017784824 | 0,19760125  |
| DNAJC4   | -1,000104108 | 5,391109186 | 0,017790082 | 0,19760125  |
| PGK1     | 1,387615157  | 9,355061994 | 0,017792516 | 0,19760125  |
| C3orf14  | 1,481403029  | 5,021523745 | 0,01790725  | 0,198552099 |
| COL12A1  | 2,267265643  | 7,568052217 | 0,017985648 | 0,198967195 |
| EGR1     | -1,545676991 | 10,07714598 | 0,018003044 | 0,198967195 |
| TK1      | 1,49365464   | 6,003269942 | 0,018090602 | 0,199436003 |
| TMEM43   | -1,010676156 | 5,707682718 | 0,018103957 | 0,199436003 |
| DEDD     | -0,883047121 | 6,360423457 | 0,018155307 | 0,199544022 |
| SOX13    | -1,107917543 | 4,789466116 | 0,018172289 | 0,199544022 |
| RARS     | 1,379690342  | 6,096919338 | 0,01821077  | 0,199645079 |
| TXNDC15  | -1,033126544 | 4,191081869 | 0,018517338 | 0,202518001 |
| MTBP     | 2,233130327  | 4,789472664 | 0,018532224 | 0,202518001 |
| HMHA1    | -0,997899512 | 4,966781573 | 0,018739959 | 0,204460447 |
| WDR19    | -0,961711689 | 4,565940391 | 0,018886859 | 0,205187867 |
| FANCG    | 1,152784687  | 5,183465607 | 0,018888181 | 0,205187867 |
| SNX25    | -1,094780117 | 6,12703778  | 0,018908078 | 0,205187867 |
| NR4A3    | -1,472440932 | 5,073177655 | 0,018926993 | 0,205187867 |
| CXCL16   | -1,177091027 | 7,008096668 | 0,019175735 | 0,207554501 |
| PWP1     | 1,188810641  | 5,922980793 | 0,019232172 | 0,207680813 |
| KLF13    | -1,018608247 | 7,466436951 | 0,019248317 | 0,207680813 |
| ARAP3    | -1,140588749 | 4,634725787 | 0,019342132 | 0,20836335  |
| LRRC37A  | -1,048085339 | 4,288319343 | 0,019448389 | 0,209177548 |
| HSPG2    | -1,444700612 | 8,184325604 | 0,019486435 | 0,20925669  |
| UBFD1    | 1,588905497  | 3,901186051 | 0,019558951 | 0,209268074 |
| SEMA4B   | 1,565009135  | 6,706284939 | 0,019560772 | 0,209268074 |
| HSPA8    | 1,321953418  | 10,91462811 | 0,019587646 | 0,209268074 |
| SHMT2    | 1,262708398  | 6,744186911 | 0,019610251 | 0,209268074 |
| FLT3LG   | -0,968224338 | 4,673391611 | 0,01969754  | 0,209871131 |
| DOK2     | -1,292479424 | 5,323132715 | 0,019995629 | 0,212325198 |
| APBB1IP  | -1,172310075 | 3,745254356 | 0,020006798 | 0,212325198 |
| SRXN1    | 1,869447643  | 7,828598307 | 0,020021279 | 0,212325198 |

|          |              |             |             |             |
|----------|--------------|-------------|-------------|-------------|
| KIAA0430 | -1,023711935 | 4,602040255 | 0,020100603 | 0,212789662 |
| NOLC1    | 1,483111635  | 7,771657142 | 0,020128597 | 0,212789662 |
| CCDC138  | 1,520507018  | 4,477910197 | 0,020158692 | 0,212789662 |
| HCST     | -1,256319989 | 5,79800641  | 0,020244635 | 0,213220892 |
| DHX34    | 1,817202828  | 5,328372885 | 0,020262082 | 0,213220892 |
| ISCU     | -0,87083789  | 6,935516828 | 0,02035131  | 0,213829862 |
| TRMT6    | 1,136950711  | 5,175906056 | 0,020382795 | 0,213831199 |
| TFPI     | -1,453355129 | 8,105270768 | 0,020452802 | 0,213995446 |
| DHCR24   | -1,168049227 | 7,24236271  | 0,020461216 | 0,213995446 |
| GPX8     | 1,887196546  | 6,662506226 | 0,020499003 | 0,21406233  |
| EMILIN2  | -1,018737562 | 5,629063523 | 0,020622622 | 0,214579797 |
| ZCCHC17  | 1,165044685  | 5,262893216 | 0,020632381 | 0,214579797 |
| OSTC     | 1,194471125  | 8,054809395 | 0,020672505 | 0,214579797 |
| NECAP2   | -1,016913827 | 5,632199437 | 0,020703285 | 0,214579797 |
| NUDT21   | 1,09351796   | 8,033670629 | 0,020731083 | 0,214579797 |
| HDGF     | 1,067843242  | 8,619405233 | 0,020737364 | 0,214579797 |
| DBN1     | 1,587672848  | 7,726867449 | 0,020825006 | 0,215160172 |
| PUS1     | 1,300627518  | 4,990028197 | 0,020864242 | 0,215239438 |
| ZNF394   | -0,998303118 | 3,882359572 | 0,020905651 | 0,215340841 |
| NSUN3    | -1,117890185 | 4,378618468 | 0,021001133 | 0,215998078 |
| CCDC109B | 1,33088757   | 5,266333755 | 0,021375883 | 0,219225457 |
| POT1     | 1,441957004  | 4,624658919 | 0,021379224 | 0,219225457 |
| TMEM14A  | 1,274037186  | 6,746824867 | 0,021555014 | 0,220696154 |
| NPAS2    | 2,017124288  | 5,441290605 | 0,021716231 | 0,221689054 |
| RNF13    | -0,873825366 | 6,129434268 | 0,02171701  | 0,221689054 |
| SPRYD3   | -1,051364414 | 5,607561722 | 0,021760884 | 0,221804885 |
| MMP11    | 2,931877352  | 6,920852177 | 0,021860999 | 0,222492767 |
| RUVBL2   | 1,374474763  | 5,591475134 | 0,021898409 | 0,222541359 |
| MTHFD2   | 1,327175024  | 7,298973464 | 0,021983163 | 0,222898721 |
| SETD6    | 1,31453653   | 4,583577012 | 0,02199895  | 0,222898721 |
| RHOD     | 1,475566569  | 5,902959468 | 0,022176637 | 0,223790482 |
| ARL4C    | 1,934208746  | 7,931650971 | 0,022184687 | 0,223790482 |
| NDUFB5   | 0,965112918  | 8,335603402 | 0,022185418 | 0,223790482 |
| TCEA1    | 1,112316764  | 7,333024957 | 0,022264424 | 0,224175728 |
| BAZ1B    | 1,317834469  | 6,15086783  | 0,02228936  | 0,224175728 |
| CDH24    | 1,840314058  | 5,336308725 | 0,022376987 | 0,224725583 |
| DDX6     | 1,128006351  | 8,862839178 | 0,022448057 | 0,225107794 |
| HSP90AB1 | 1,366104102  | 11,49095545 | 0,0225943   | 0,226145608 |
| DNAJC21  | 1,208760869  | 6,49895226  | 0,022617877 | 0,226145608 |
| APBB2    | -0,897690064 | 6,043758951 | 0,022740206 | 0,227035819 |
| PMS2CL   | 1,599450845  | 4,236564892 | 0,022857047 | 0,227868722 |
| DNTTIP1  | 2,037241429  | 6,805025609 | 0,022896637 | 0,227930168 |
| MTRR     | -1,044487093 | 4,705788446 | 0,022977475 | 0,228401465 |
| SLMO2    | 1,274276682  | 7,132386985 | 0,023107438 | 0,229358979 |
| SNRNP48  | 1,795197432  | 6,633424132 | 0,023192073 | 0,229864459 |
| ABCC10   | -0,959052541 | 4,619352242 | 0,023253337 | 0,230137158 |
| ZFP106   | -1,10041621  | 6,370095752 | 0,023415611 | 0,231268292 |
| HLA-DRB1 | -1,39386897  | 10,36759201 | 0,023444438 | 0,231268292 |
| SHB      | 1,271856104  | 7,188456948 | 0,023469374 | 0,231268292 |
| ZNF438   | -1,018761572 | 4,139074628 | 0,023548329 | 0,231513015 |

|          |              |             |             |             |
|----------|--------------|-------------|-------------|-------------|
| DPYD     | -0,999912021 | 5,415263388 | 0,023604084 | 0,231513015 |
| MBOAT2   | 1,597734851  | 6,153182214 | 0,023613387 | 0,231513015 |
| LTA4H    | -1,140524031 | 7,892377328 | 0,023630013 | 0,231513015 |
| SLC30A9  | 1,132894515  | 7,367160831 | 0,023821802 | 0,232454887 |
| SENP5    | 1,480074194  | 6,497742433 | 0,023829914 | 0,232454887 |
| PTPN14   | 1,328878877  | 6,050106385 | 0,023861704 | 0,232454887 |
| CHST15   | -1,244845475 | 5,329959062 | 0,023878746 | 0,232454887 |
| MDM2     | 1,410570499  | 7,292877454 | 0,023910323 | 0,232454887 |
| ZFAND1   | 1,187601175  | 6,766538616 | 0,023930683 | 0,232454887 |
| HNRNPAB  | 1,134178729  | 7,999666894 | 0,024030988 | 0,233097162 |
| PAG1     | -1,004275806 | 5,503247506 | 0,024228494 | 0,23427265  |
| ECHDC2   | -0,97555434  | 5,073152385 | 0,02426504  | 0,23427265  |
| ZZZ3     | 1,204347297  | 6,827805572 | 0,024313442 | 0,23427265  |
| NCF2     | -1,284562602 | 5,949322309 | 0,024314278 | 0,23427265  |
| DTL      | 1,460598627  | 4,578719329 | 0,024374446 | 0,23427265  |
| CMAS     | 1,155205519  | 6,062782222 | 0,02438271  | 0,23427265  |
| ZNF187   | 1,401052778  | 3,781227707 | 0,024392665 | 0,23427265  |
| TAOK1    | 0,980353303  | 7,752785626 | 0,024463347 | 0,234621042 |
| DCUN1D1  | 1,159975551  | 7,249587748 | 0,024579352 | 0,235315921 |
| TSPAN6   | 1,420423406  | 6,030284666 | 0,024604818 | 0,235315921 |
| HMGA1    | 1,878211657  | 4,286469296 | 0,024701758 | 0,235912165 |
| HLA-E    | -1,007464831 | 10,01118113 | 0,024800238 | 0,236521434 |
| TRANK1   | -1,041548331 | 4,924007252 | 0,024854562 | 0,236708457 |
| TMEM48   | 1,380555928  | 5,217809547 | 0,024998346 | 0,237745777 |
| SLC25A20 | -1,006257533 | 4,072178482 | 0,025097548 | 0,238165314 |
| VBP1     | 1,139932198  | 7,324296427 | 0,025112313 | 0,238165314 |
| VAR5     | 1,087554626  | 6,645143081 | 0,025231947 | 0,238472462 |
| CUL4B    | 1,139046664  | 7,50614163  | 0,025239237 | 0,238472462 |
| SACS     | 1,481103021  | 6,672953509 | 0,025263835 | 0,238472462 |
| FRMD6    | 1,590193145  | 6,614877902 | 0,025284586 | 0,238472462 |
| ATXN2    | -1,064824323 | 5,296643438 | 0,02545185  | 0,239718462 |
| SNX7     | 1,135474361  | 6,535986323 | 0,025605641 | 0,240793157 |
| ZFP91    | 1,063487791  | 7,020890865 | 0,025636579 | 0,240793157 |
| CD68     | -1,285262191 | 7,336087414 | 0,025708195 | 0,241133672 |
| DBF4     | 1,59175189   | 5,973381544 | 0,02577839  | 0,241459951 |
| SFPQ     | 0,984914616  | 6,974581724 | 0,025842381 | 0,241727288 |
| VPS54    | 1,253762655  | 6,660184616 | 0,025927778 | 0,242193864 |
| CYCS     | 1,267923127  | 8,181754246 | 0,026125403 | 0,243706046 |
| IER5L    | 1,742463615  | 7,337724186 | 0,026286398 | 0,243821938 |
| MGAT4A   | -1,007470111 | 5,555236473 | 0,026298685 | 0,243821938 |
| HCK      | -1,163358871 | 4,759144977 | 0,026395947 | 0,243821938 |
| SNHG6    | 1,283425742  | 8,319274711 | 0,026401862 | 0,243821938 |
| INPP5K   | -0,850885604 | 5,700591717 | 0,026427683 | 0,243821938 |
| ARHGAP18 | -1,096331736 | 6,68308005  | 0,026483956 | 0,243821938 |
| GLRX2    | 1,138971786  | 5,060634846 | 0,0265221   | 0,243821938 |
| USP53    | -1,25852463  | 5,450181264 | 0,026523031 | 0,243821938 |
| TMEM179B | -0,915954277 | 5,81097571  | 0,026534927 | 0,243821938 |
| LSM1     | 2,085360356  | 5,708823132 | 0,026547664 | 0,243821938 |
| PTPLAD2  | -1,269728252 | 4,254706525 | 0,026548264 | 0,243821938 |
| PTRF     | -1,093653703 | 8,919640617 | 0,026566901 | 0,243821938 |



|           |              |             |             |             |
|-----------|--------------|-------------|-------------|-------------|
| CCDC112   | 1,404747638  | 4,458494256 | 0,026690162 | 0,244405381 |
| ACOT13    | 1,228371701  | 5,69851097  | 0,026735065 | 0,244405381 |
| IRF2BP2   | -1,055688806 | 7,678261885 | 0,026737999 | 0,244405381 |
| RAB11B    | -0,898895852 | 7,944993277 | 0,026787468 | 0,244529779 |
| CEBPZ     | 1,403339705  | 5,168481262 | 0,026826334 | 0,24455718  |
| NIN       | 1,264352056  | 6,34464157  | 0,026920211 | 0,24508534  |
| DNAL4     | -0,982766362 | 4,423479481 | 0,027098625 | 0,245901098 |
| RAI14     | 1,225476319  | 5,42126516  | 0,027171832 | 0,245901098 |
| RABGGTA   | -0,877352993 | 5,182083208 | 0,027238181 | 0,245901098 |
| ITGAV     | 1,256856809  | 7,920939645 | 0,02727331  | 0,245901098 |
| UNC93B1   | -1,000835033 | 5,920801948 | 0,027287521 | 0,245901098 |
| ELN       | -1,644158387 | 9,024585411 | 0,027362766 | 0,245901098 |
| NCOA1     | -0,803473346 | 5,28765376  | 0,027526519 | 0,245901098 |
| SEC23A    | 1,029974708  | 7,416597388 | 0,027552774 | 0,245901098 |
| KTN1      | 1,315318149  | 8,463521255 | 0,027573001 | 0,245901098 |
| TACC1     | -0,837664461 | 7,579519959 | 0,027605126 | 0,245901098 |
| RAD17     | -1,105036213 | 5,096689782 | 0,027638151 | 0,245901098 |
| STRN3     | 1,232644904  | 6,819654644 | 0,027656087 | 0,245901098 |
| FBXL4     | -1,042796236 | 4,582168801 | 0,027657387 | 0,245901098 |
| TTC21B    | -1,023410518 | 4,304474716 | 0,027750008 | 0,245901098 |
| PIK3R1    | -1,113620425 | 7,420382412 | 0,027763735 | 0,245901098 |
| NOD1      | -0,896987572 | 5,646324411 | 0,027811579 | 0,245901098 |
| ABHD13    | -1,004059208 | 3,312335326 | 0,02782071  | 0,245901098 |
| TDG       | 1,064746685  | 5,429334852 | 0,027842478 | 0,245901098 |
| C5orf28   | 1,244925036  | 5,146901381 | 0,027866192 | 0,245901098 |
| KCTD5     | 1,359581024  | 8,054994511 | 0,027884186 | 0,245901098 |
| FGD6      | 1,488018227  | 6,289043996 | 0,027919564 | 0,245901098 |
| CSRP1     | -1,272047566 | 6,940574409 | 0,027922108 | 0,245901098 |
| PTS       | 1,26602552   | 6,815914617 | 0,02794363  | 0,245901098 |
| THBS1     | -1,434242733 | 7,422765139 | 0,027946403 | 0,245901098 |
| SLC12A2   | -0,877275615 | 5,217465636 | 0,027972422 | 0,245901098 |
| SENP7     | -0,926952446 | 4,751897395 | 0,027979224 | 0,245901098 |
| LRRC37B   | -0,959863663 | 3,242230097 | 0,028025052 | 0,245901098 |
| TEX264    | -0,979759765 | 4,779866142 | 0,028025566 | 0,245901098 |
| RNF170    | -0,952542756 | 3,724338804 | 0,028055588 | 0,245901098 |
| WHSC1     | 1,844219304  | 6,848430092 | 0,028187167 | 0,24673722  |
| ZC3H14    | 1,000988024  | 5,391431792 | 0,028455176 | 0,248763904 |
| CXCL10    | 2,304250498  | 7,74733584  | 0,028534843 | 0,249080444 |
| UBE2K     | 1,03848187   | 7,274054162 | 0,028600455 | 0,249080444 |
| ACP2      | -0,82485083  | 5,436240939 | 0,028600966 | 0,249080444 |
| CCDC88A   | 1,152214818  | 5,728930358 | 0,028659381 | 0,249141681 |
| CXCR4     | -1,340222188 | 6,322976261 | 0,028681071 | 0,249141681 |
| PYCARD    | -1,076401611 | 5,719924298 | 0,028790453 | 0,249280466 |
| SLC9A3R2  | -1,05459824  | 8,649303331 | 0,02881069  | 0,249280466 |
| WDR75     | 0,981752885  | 6,46445607  | 0,028835774 | 0,249280466 |
| MPHOSPH10 | 1,040001087  | 5,735011384 | 0,028843274 | 0,249280466 |
| LNX2      | -1,021047151 | 4,388605462 | 0,0291589   | 0,25161828  |
| CALU      | 1,420353345  | 8,461030183 | 0,029187573 | 0,25161828  |
| HADH      | -0,922515899 | 5,404789386 | 0,029332162 | 0,252545471 |
| CAPRIN2   | 1,317885733  | 5,403022699 | 0,029387931 | 0,252706559 |

|          |              |             |             |             |
|----------|--------------|-------------|-------------|-------------|
| TXNDC11  | -0,972052838 | 6,474233436 | 0,029516411 | 0,253491697 |
| IRAK1BP1 | -0,864412574 | 3,688003773 | 0,029692454 | 0,254594248 |
| BAG2     | 1,501183782  | 6,463391356 | 0,029719463 | 0,254594248 |
| RBBP8    | 1,129362999  | 5,861457345 | 0,029853332 | 0,255420161 |
| CHPT1    | -1,004275651 | 6,715386388 | 0,029968505 | 0,256084259 |
| TAF15    | 1,026307579  | 6,845686374 | 0,030031857 | 0,256098341 |
| GNAI3    | 1,140527731  | 7,256875769 | 0,030045267 | 0,256098341 |
| ARHGEF2  | -1,018076908 | 6,004896589 | 0,030099471 | 0,256176527 |
| UHRF1    | 1,73310612   | 4,573125438 | 0,030142159 | 0,256176527 |
| LONP1    | 1,586310509  | 6,116241159 | 0,030169398 | 0,256176527 |
| POR      | -0,958629189 | 6,4586378   | 0,030204711 | 0,256176527 |
| CGN      | -1,379298885 | 3,46693031  | 0,030257323 | 0,25630396  |
| LEPREL2  | 1,837454254  | 5,093612889 | 0,030338568 | 0,256379462 |
| USP54    | -1,067941172 | 4,933313833 | 0,030341432 | 0,256379462 |
| TBCEL    | -0,954456274 | 4,939470587 | 0,030532649 | 0,257675904 |
| ZDBF2    | 1,814147896  | 4,887897184 | 0,030634529 | 0,257775056 |
| MCPH1    | -0,828483677 | 5,714034141 | 0,030643909 | 0,257775056 |
| FAM188A  | -0,890749454 | 4,971748246 | 0,030657805 | 0,257775056 |
| LRRC16A  | -1,194676758 | 4,534079973 | 0,030769821 | 0,258398286 |
| MPEG1    | -1,04179798  | 5,155193471 | 0,030883009 | 0,259029813 |
| NOP58    | 0,947820154  | 6,770879194 | 0,030958702 | 0,259033169 |
| MBNL2    | -0,958226392 | 7,87241066  | 0,030993387 | 0,259033169 |
| NEDD8    | 1,310253615  | 4,315803112 | 0,03099737  | 0,259033169 |
| TXNL4A   | 1,044581229  | 6,524775188 | 0,031047751 | 0,259136611 |
| FAM160A2 | -0,911036146 | 4,930797687 | 0,031177082 | 0,25989795  |
| LRRC42   | 1,199215482  | 4,422183985 | 0,031398326 | 0,260566641 |
| CDKN2C   | 1,547817459  | 5,291780543 | 0,03142284  | 0,260566641 |
| OSGEP    | -0,958715724 | 4,848700128 | 0,031429289 | 0,260566641 |
| FLNC     | 1,801115619  | 6,626688844 | 0,031444761 | 0,260566641 |
| RPL26L1  | 1,10455891   | 6,695673704 | 0,031461221 | 0,260566641 |
| SERINC1  | -0,979712126 | 8,107838337 | 0,031486569 | 0,260566641 |
| LRFN4    | 1,286049316  | 5,345290802 | 0,031569621 | 0,260822993 |
| HLA-DRA  | -1,263502964 | 10,68538977 | 0,031594045 | 0,260822993 |
| BTBD9    | -1,16452524  | 6,817390118 | 0,031666185 | 0,261102438 |
| KTI12    | 1,086826936  | 5,986356145 | 0,031818798 | 0,262009392 |
| MRPL21   | 1,342508898  | 7,093831861 | 0,031853026 | 0,262009392 |
| PTGES3   | 1,22459634   | 9,410627436 | 0,031938725 | 0,262397794 |
| TRAK2    | -0,908226769 | 5,997635083 | 0,032127985 | 0,262706255 |
| DPY30    | 1,165523621  | 7,217906138 | 0,032139916 | 0,262706255 |
| ATP8B1   | -1,175530448 | 4,356121027 | 0,032141686 | 0,262706255 |
| TLN1     | -0,927994137 | 7,49745806  | 0,032149183 | 0,262706255 |
| UCHL5    | 1,466255761  | 6,469962159 | 0,03217265  | 0,262706255 |
| WDR18    | 1,11145032   | 5,57113216  | 0,032207425 | 0,262706255 |
| CLU      | -1,43907952  | 7,929219034 | 0,032512009 | 0,264873819 |
| RGS10    | 1,853071665  | 7,387358923 | 0,03255809  | 0,264932714 |
| PHB      | 1,032842456  | 7,306745141 | 0,0327056   | 0,265815839 |
| CNOT7    | 1,068980936  | 6,851040787 | 0,032815271 | 0,266198074 |
| CSE1L    | 1,111045247  | 6,775916481 | 0,03287215  | 0,266198074 |
| RPL37    | 1,311031293  | 6,721478612 | 0,032878437 | 0,266198074 |
| PACRGL   | 1,738540846  | 5,021574986 | 0,032908781 | 0,266198074 |

|           |              |             |             |             |
|-----------|--------------|-------------|-------------|-------------|
| PSMA1     | 1,391945889  | 7,613468444 | 0,033115002 | 0,266897277 |
| SPAG7     | -0,965527754 | 4,590944651 | 0,033179072 | 0,266897277 |
| HSPA4     | 0,977184489  | 7,307214925 | 0,033191996 | 0,266897277 |
| KPNB1     | 1,305285515  | 8,18520209  | 0,033192665 | 0,266897277 |
| ABCB6     | 1,536732804  | 5,618689262 | 0,033215795 | 0,266897277 |
| CIQBP     | 1,10645635   | 7,50863898  | 0,033230061 | 0,266897277 |
| KPNA5     | -0,922001388 | 4,446801781 | 0,033303963 | 0,267110505 |
| C12orf23  | 0,929094622  | 6,282760345 | 0,033342311 | 0,267110505 |
| SIPA1     | -0,98344187  | 6,13847323  | 0,033432098 | 0,267110505 |
| PYGL      | 1,498129588  | 6,027308211 | 0,033449466 | 0,267110505 |
| FER       | -1,01530719  | 5,126190844 | 0,033452467 | 0,267110505 |
| SF3B3     | 1,029518291  | 8,097301679 | 0,033761932 | 0,269266217 |
| ZFP36L2   | -0,968736744 | 9,371129441 | 0,033931934 | 0,269718464 |
| ENTPD6    | 1,140279784  | 6,239584686 | 0,03398549  | 0,269718464 |
| MFAP3     | -0,894191507 | 4,936801161 | 0,034017579 | 0,269718464 |
| ROCK1     | -0,994774626 | 5,046852184 | 0,034030851 | 0,269718464 |
| ZBTB4     | -0,797577888 | 6,932611661 | 0,034056057 | 0,269718464 |
| ENO1      | 1,151463548  | 10,32602794 | 0,034087787 | 0,269718464 |
| RPL30     | 1,296131072  | 12,11227352 | 0,034095515 | 0,269718464 |
| MRPS26    | 1,373542516  | 6,744704656 | 0,034208876 | 0,270072304 |
| SETX      | -0,819291522 | 6,098454708 | 0,03425639  | 0,270072304 |
| KIF1C     | -0,939280152 | 5,907080629 | 0,034259062 | 0,270072304 |
| VPS53     | -1,135068645 | 3,779480941 | 0,034336976 | 0,270373945 |
| PDE3B     | -1,063635767 | 4,485918754 | 0,034379153 | 0,270393823 |
| EIF2AK1   | 1,139179685  | 7,734868512 | 0,034525761 | 0,271176123 |
| XPO6      | 1,028740738  | 6,725698488 | 0,034561707 | 0,271176123 |
| SSH2      | -0,742989501 | 5,968155367 | 0,034597922 | 0,271176123 |
| SREBF1    | -0,996985478 | 5,424697336 | 0,034773772 | 0,272137584 |
| RFC4      | 1,432873374  | 6,163021374 | 0,034829332 | 0,272137584 |
| JAK1      | -0,963522791 | 6,563549746 | 0,034840315 | 0,272137584 |
| MTHFD1    | 1,096110333  | 7,211120382 | 0,034970313 | 0,272597854 |
| ARHGEF3   | -1,019912848 | 5,034916998 | 0,034979194 | 0,272597854 |
| LOC285359 | 1,254063989  | 4,440746106 | 0,035108269 | 0,273010492 |
| ATG3      | 1,129779052  | 6,907710129 | 0,035112216 | 0,273010492 |
| NARG2     | 0,943404417  | 5,366938673 | 0,03517351  | 0,273175589 |
| CPT1A     | -0,987955065 | 5,700872638 | 0,035305553 | 0,273889151 |
| COLEC12   | -1,238486169 | 6,638660918 | 0,035445074 | 0,274380417 |
| HIST1H2BD | 1,191949081  | 8,957580374 | 0,035483701 | 0,274380417 |
| HNRNPR    | 1,088074271  | 7,018404524 | 0,035489592 | 0,274380417 |
| PARP2     | 1,856109489  | 6,028329751 | 0,035574612 | 0,274694771 |
| GALNT1    | 1,042852334  | 7,379743776 | 0,035610819 | 0,274694771 |
| PLEKHA1   | -0,753084384 | 5,476804992 | 0,035700599 | 0,274839208 |
| CKAP5     | 1,177686184  | 7,373497275 | 0,035738026 | 0,274839208 |
| AATF      | 1,248824236  | 6,757241096 | 0,035750459 | 0,274839208 |
| RHOA      | -0,94642126  | 5,559758971 | 0,03580252  | 0,274929489 |
| PIM3      | -1,020361694 | 6,468149262 | 0,035865492 | 0,274961626 |
| HK2       | 1,152955428  | 6,602948217 | 0,035887351 | 0,274961626 |
| ATG5      | 1,098861513  | 6,527238438 | 0,035965312 | 0,275249677 |
| NAT9      | 1,409242842  | 4,979127578 | 0,036073709 | 0,275583511 |
| IMPDH1    | 1,071905511  | 6,503552193 | 0,036168902 | 0,275583511 |

|          |              |             |             |             |
|----------|--------------|-------------|-------------|-------------|
| EIF2S1   | 1,088425731  | 5,990943058 | 0,036172169 | 0,275583511 |
| ITGB3    | 1,750314483  | 5,43057728  | 0,036227507 | 0,275583511 |
| NPDC1    | -0,971445435 | 6,48639998  | 0,03624695  | 0,275583511 |
| MGST3    | -0,860392817 | 7,533283998 | 0,036251416 | 0,275583511 |
| PSMG1    | 1,330341918  | 5,717187223 | 0,036386084 | 0,276047516 |
| KIAA1429 | 0,998729702  | 5,041067471 | 0,036393617 | 0,276047516 |
| PLXDC2   | -1,147757341 | 6,804061679 | 0,0364339   | 0,276047516 |
| LRPPRC   | 1,261862988  | 6,819328471 | 0,036573448 | 0,276797269 |
| COL5A2   | 1,369537451  | 8,400837949 | 0,036663802 | 0,276900318 |
| CNPY2    | 0,982202971  | 7,606090748 | 0,036668278 | 0,276900318 |
| PIK3CD   | -0,903663197 | 4,354093497 | 0,036710644 | 0,276913586 |
| PPT1     | -0,864231584 | 7,02673592  | 0,036788259 | 0,277058404 |
| CCNB1IP1 | 1,094317846  | 5,995123405 | 0,03684796  | 0,277058404 |
| METAP1   | 0,994034481  | 5,772087232 | 0,036851734 | 0,277058404 |
| PPM1G    | 1,065167579  | 6,263218986 | 0,03691942  | 0,277261589 |
| TAF9     | 1,150496938  | 4,978410084 | 0,036984587 | 0,277445432 |
| GCSH     | 1,339415383  | 5,455396181 | 0,037074943 | 0,277817625 |
| PIK3R5   | -0,93126775  | 5,068525649 | 0,037124063 | 0,277880336 |
| BOLA3    | 1,621862061  | 6,932258737 | 0,037199562 | 0,277921009 |
| MCM7     | 1,477635868  | 6,616608944 | 0,037211011 | 0,277921009 |
| RNF6     | 1,160494857  | 6,381219741 | 0,037277659 | 0,278114174 |
| ZNF431   | -0,835762648 | 5,935331066 | 0,037465101 | 0,279207128 |
| STX16    | 0,997362826  | 7,146513084 | 0,037555995 | 0,279457923 |
| CNIH4    | 0,942005551  | 7,246657706 | 0,037580718 | 0,279457923 |
| XPOT     | 1,041611995  | 6,390462892 | 0,037626251 | 0,279491727 |
| BRX1     | 1,038835013  | 6,235764118 | 0,037800047 | 0,280418091 |
| KBTBD2   | 1,280883991  | 7,415077735 | 0,037833208 | 0,280418091 |
| CPEB4    | -0,928182556 | 5,723827093 | 0,037921522 | 0,280767491 |
| HEG1     | -0,942642553 | 6,580344379 | 0,038253991 | 0,282921873 |
| SUZ12    | 1,302867993  | 6,921756165 | 0,038349597 | 0,283321672 |
| RPL26    | 1,267644601  | 11,77964001 | 0,038420696 | 0,283365493 |
| KHDRBS1  | 0,993492416  | 8,570490677 | 0,038438639 | 0,283365493 |
| IGFBP2   | 2,336949589  | 8,026190333 | 0,038688628 | 0,284586638 |
| C12orf45 | 1,198777836  | 5,243361263 | 0,038735807 | 0,284586638 |
| USP48    | -0,85110666  | 5,490565869 | 0,038742096 | 0,284586638 |
| STEAP1   | 1,389050089  | 5,418816732 | 0,038800536 | 0,284586638 |
| SMAD1    | -1,203252834 | 5,20681046  | 0,038915794 | 0,284586638 |
| FTSJ3    | 0,997231832  | 4,57711752  | 0,038922993 | 0,284586638 |
| EIF4G1   | 1,209077567  | 9,320670394 | 0,038926287 | 0,284586638 |
| GATSL3   | -0,897522273 | 3,405644901 | 0,038938163 | 0,284586638 |
| ILF2     | 0,959669447  | 8,110897308 | 0,03907846  | 0,285306227 |
| DCN      | -1,431116789 | 10,04571084 | 0,039288736 | 0,286534644 |
| LPAR6    | -1,113513264 | 4,927459577 | 0,039331957 | 0,286543392 |
| OAF      | 1,857996552  | 5,791451133 | 0,039725327 | 0,289014483 |
| PRIM1    | 1,193187123  | 4,570728675 | 0,039760012 | 0,289014483 |
| HSDL2    | -0,938046345 | 5,408763727 | 0,039798299 | 0,289014483 |
| STRAP    | 1,306910386  | 7,574851313 | 0,039901276 | 0,289290417 |
| TBCA     | 1,148889342  | 8,963302388 | 0,039921144 | 0,289290417 |
| BUB3     | 1,058466542  | 7,058797691 | 0,040036501 | 0,289409949 |
| OTUD6B   | 1,191283114  | 4,931602834 | 0,0400574   | 0,289409949 |

|          |              |             |             |             |
|----------|--------------|-------------|-------------|-------------|
| SBNO1    | 1,029209232  | 7,023689144 | 0,040064964 | 0,289409949 |
| FBXO22   | 0,947300286  | 4,733178278 | 0,040206037 | 0,290121658 |
| PLA2G16  | -1,046974096 | 6,1136483   | 0,040364585 | 0,290695057 |
| NHP2     | 1,009324749  | 5,446698769 | 0,040370761 | 0,290695057 |
| C11orf75 | -0,922131973 | 3,992916365 | 0,040494483 | 0,291015029 |
| PDCD6    | 1,096463432  | 7,466581365 | 0,040500552 | 0,291015029 |
| INPP5A   | -0,995055168 | 5,884073901 | 0,040640575 | 0,291701838 |
| PAN3     | -0,845334445 | 4,737819496 | 0,040681691 | 0,291701838 |
| PLXNA1   | 1,227458309  | 6,448973907 | 0,040819619 | 0,292383386 |
| SH2D2A   | 1,578394178  | 4,578612618 | 0,040943923 | 0,292966014 |
| NR2C2AP  | 1,120874221  | 4,373719918 | 0,041354889 | 0,29559642  |
| NOP56    | 1,364483461  | 7,87068503  | 0,041424243 | 0,295782104 |
| ZBTB1    | -0,75177135  | 5,650069756 | 0,041630942 | 0,296947065 |
| PLOD1    | 1,230210695  | 8,928724648 | 0,041687459 | 0,297019184 |
| FAM43A   | -1,310657706 | 6,810406035 | 0,041766808 | 0,297019184 |
| NKTR     | -1,047113467 | 4,473977998 | 0,041771726 | 0,297019184 |
| GAS7     | -1,135230985 | 6,785180821 | 0,041867248 | 0,297388299 |
| HPS3     | 1,229452725  | 5,23804182  | 0,042124235 | 0,29890235  |
| SLCO2B1  | -1,01490358  | 8,16935929  | 0,042269112 | 0,299618583 |
| C8orf4   | -1,559039695 | 8,164034882 | 0,042364033 | 0,299979582 |
| SORT1    | -1,172765935 | 6,708663699 | 0,042439678 | 0,300203488 |
| TMEM167A | 0,930362798  | 7,965635563 | 0,042563615 | 0,300444501 |
| DDX1     | 0,984236121  | 6,158750176 | 0,042601833 | 0,300444501 |
| GGA2     | -0,778308107 | 6,309559246 | 0,04266809  | 0,300444501 |
| DCAF8    | -0,757090963 | 5,604293976 | 0,042725359 | 0,300444501 |
| TMEM66   | -0,852333839 | 8,847495042 | 0,042763113 | 0,300444501 |
| BET1L    | -0,940776811 | 3,67519304  | 0,042797134 | 0,300444501 |
| NIPAL3   | -0,740031696 | 4,852542063 | 0,042822173 | 0,300444501 |
| MTERFD1  | 1,230208768  | 4,286448386 | 0,042856539 | 0,300444501 |
| TNFAIP2  | -0,962391353 | 7,439839532 | 0,042870289 | 0,300444501 |
| ARRDC2   | -0,862353005 | 6,331725192 | 0,042982672 | 0,300922832 |
| SERBP1   | 1,131147745  | 8,568486497 | 0,04310929  | 0,301499741 |
| RGS2     | -1,166975932 | 5,546540069 | 0,043207523 | 0,301877153 |
| ZFAND6   | -0,84355743  | 5,756963087 | 0,043344299 | 0,302380768 |
| MINPP1   | 1,076142014  | 6,627257158 | 0,043388889 | 0,302380768 |
| NOP14    | 1,14016367   | 6,66713307  | 0,043412637 | 0,302380768 |
| METTL1   | 1,181805586  | 4,578308806 | 0,043526844 | 0,302796859 |
| CCDC115  | -0,870783317 | 5,250104257 | 0,043561185 | 0,302796859 |
| KLHDC7B  | 1,859241874  | 4,881305788 | 0,043655359 | 0,302804783 |
| RPF2     | 1,45766656   | 5,884532456 | 0,043658928 | 0,302804783 |
| POC1A    | 1,085876491  | 3,831048521 | 0,043715309 | 0,302804783 |
| C15orf38 | -0,917099281 | 4,503275374 | 0,043739949 | 0,302804783 |
| HSPA1B   | 1,316291677  | 8,849311813 | 0,043904264 | 0,303634056 |
| ZFP112   | 1,591762961  | 4,614070094 | 0,043975692 | 0,303640956 |
| DOCK6    | -1,005386328 | 6,476230881 | 0,043994319 | 0,303640956 |
| AAGAB    | 0,857891649  | 5,905783193 | 0,04429979  | 0,305440107 |
| LGALS9   | -1,036002901 | 4,456302603 | 0,044546836 | 0,306735161 |
| SPATS2L  | 1,601752906  | 6,902277198 | 0,044626809 | 0,306735161 |
| TMEM170A | 1,13318606   | 5,209490213 | 0,044658498 | 0,306735161 |
| TMBIM1   | -0,991150585 | 7,460313371 | 0,044667549 | 0,306735161 |

|          |              |             |             |             |
|----------|--------------|-------------|-------------|-------------|
| CNP      | 0,922040855  | 6,567138315 | 0,044853367 | 0,307701317 |
| NF2      | 1,179212113  | 7,262021981 | 0,045051801 | 0,308596373 |
| ZNF461   | 1,312942087  | 3,438594834 | 0,045083651 | 0,308596373 |
| NUDCD1   | 1,177769828  | 5,383748187 | 0,045119605 | 0,308596373 |
| CCDC86   | 1,488800769  | 5,452475968 | 0,045232794 | 0,308815119 |
| RNPEPL1  | -0,960583547 | 6,848368338 | 0,045242162 | 0,308815119 |
| TRPM2    | 1,379734716  | 4,177115368 | 0,045524459 | 0,310431283 |
| RHBDD2   | -1,013737267 | 6,215686733 | 0,045610528 | 0,31070748  |
| RALGAPA1 | -0,937783991 | 6,122118316 | 0,045776228 | 0,311525046 |
| DYRK3    | -0,953738694 | 4,399677222 | 0,045891936 | 0,31200111  |
| PDCL3    | 1,182555308  | 4,212238362 | 0,046004063 | 0,312352391 |
| DNA2     | 1,443575351  | 5,069661061 | 0,046035218 | 0,312352391 |
| NONO     | 1,247410402  | 3,419500223 | 0,046225314 | 0,313330431 |
| TUBA1A   | -1,046067408 | 8,743758135 | 0,046429981 | 0,313867491 |
| CRYL1    | -0,815121071 | 5,08404569  | 0,046431278 | 0,313867491 |
| RPL23    | 1,204920918  | 12,21476485 | 0,046442631 | 0,313867491 |
| TTYH3    | 1,617973155  | 7,175225773 | 0,046679804 | 0,314812996 |
| DAGLB    | -0,872929478 | 4,098396958 | 0,046718707 | 0,314812996 |
| CLIC6    | -1,258810965 | 4,514938452 | 0,046721037 | 0,314812996 |
| DOCK2    | -0,941865123 | 4,375527812 | 0,046864487 | 0,31529636  |
| EIF5A2   | 1,142969954  | 4,312085159 | 0,046905182 | 0,31529636  |
| AP1G1    | -0,739797339 | 6,498792634 | 0,046931486 | 0,31529636  |
| CCDC22   | -0,82753996  | 4,256511971 | 0,047189229 | 0,315865096 |
| SAP30    | 1,05646179   | 5,718062064 | 0,04721715  | 0,315865096 |
| CCDC97   | -0,972884973 | 4,934708881 | 0,04722626  | 0,315865096 |
| FAM118A  | 1,35368933   | 5,442024261 | 0,047231408 | 0,315865096 |
| NELF     | 1,123304606  | 6,529890039 | 0,047247749 | 0,315865096 |
| IRAK1    | 1,378577633  | 4,963201877 | 0,047309192 | 0,315966093 |
| RAB23    | 1,221481285  | 6,584463288 | 0,047440806 | 0,316535086 |
| INTS10   | -0,990162875 | 5,678638002 | 0,047565381 | 0,317056046 |
| BZW1     | 1,07768736   | 8,524982814 | 0,047801402 | 0,317547145 |
| PCNA     | 1,061915318  | 6,874125921 | 0,04783521  | 0,317547145 |
| MAP1B    | 1,571880114  | 7,917113426 | 0,047860204 | 0,317547145 |
| ZNF710   | -0,833333791 | 4,680239477 | 0,047884418 | 0,317547145 |
| TCEB3    | -0,830768386 | 5,263757408 | 0,048078029 | 0,317547145 |
| CDK9     | -0,829980488 | 4,8751267   | 0,048125525 | 0,317547145 |
| RBL1     | 1,243776784  | 4,795055305 | 0,048134673 | 0,317547145 |
| KRT8     | 1,304732026  | 7,671041098 | 0,048176834 | 0,317547145 |
| TMCO3    | 1,346921597  | 7,117079169 | 0,048203206 | 0,317547145 |
| GTF3A    | 0,934776647  | 8,124108886 | 0,048215163 | 0,317547145 |
| GPR89C   | 1,093641068  | 3,740492479 | 0,048250272 | 0,317547145 |
| UTP18    | 1,025987097  | 5,824824178 | 0,048270378 | 0,317547145 |
| MRPL24   | 1,076743991  | 6,756783316 | 0,048274112 | 0,317547145 |
| RPL23A   | 0,931240046  | 5,925443254 | 0,04830162  | 0,317547145 |
| ZCCHC7   | 0,889891515  | 6,686258845 | 0,048344491 | 0,317547145 |
| CMIP     | -0,849419458 | 6,321676977 | 0,048384145 | 0,317547145 |
| SEPT11   | -0,716080161 | 6,433818954 | 0,048504626 | 0,318022655 |
| DCTPP1   | 0,997858766  | 5,947048781 | 0,04858265  | 0,318022655 |
| HDDC2    | 0,951895444  | 6,799055025 | 0,048596511 | 0,318022655 |
| B3GALT4  | -0,837259944 | 3,620631998 | 0,048751247 | 0,318729389 |

|          |              |             |             |             |
|----------|--------------|-------------|-------------|-------------|
| DFFA     | 1,229840749  | 4,460321576 | 0,04893374  | 0,319259132 |
| ACADVL   | -0,887884991 | 4,417827367 | 0,048954166 | 0,319259132 |
| VWA5A    | -1,239921135 | 6,081161583 | 0,048989495 | 0,319259132 |
| SEC61G   | 2,19061082   | 9,66782468  | 0,04901955  | 0,319259132 |
| ARHGEF10 | -0,964978798 | 5,573740597 | 0,049077288 | 0,319330181 |
| SPATA20  | 1,072186096  | 4,766320185 | 0,049247562 | 0,319978827 |
| FAR1     | 1,11219175   | 5,828926581 | 0,049349783 | 0,319978827 |
| GSTA4    | -1,118631405 | 5,942675734 | 0,049448273 | 0,319978827 |
| HERC2P2  | -0,91851741  | 5,932579638 | 0,049483714 | 0,319978827 |
| EPHX1    | -1,12584586  | 6,771007807 | 0,049502698 | 0,319978827 |
| SUB1     | 1,29398501   | 9,441266323 | 0,049546132 | 0,319978827 |
| INTS1    | 1,684443976  | 7,371098393 | 0,049582289 | 0,319978827 |
| FAM105A  | -0,97697024  | 4,520558667 | 0,04958974  | 0,319978827 |
| CHKB     | -0,981707449 | 5,058148723 | 0,049599299 | 0,319978827 |
| ADAM10   | -0,686646997 | 6,791571974 | 0,049787903 | 0,320836228 |
| FCHSD2   | -0,82110519  | 2,412089858 | 0,049826304 | 0,320836228 |
| GNB5     | 0,964166835  | 4,904249679 | 0,049937876 | 0,320968137 |
| C1QB     | -1,122139669 | 9,349266583 | 0,049954942 | 0,320968137 |
| SYNGR2   | -0,908542754 | 7,318169288 | 0,05001965  | 0,320968137 |
| RASSF5   | -0,996142645 | 4,745089762 | 0,050035068 | 0,320968137 |
| C3orf38  | -0,767291515 | 4,778495923 | 0,050148034 | 0,321390457 |
| ARL17A   | 1,435423086  | 4,759087203 | 0,050219437 | 0,321545862 |
| GOLPH3   | 0,984930707  | 7,718465041 | 0,050271179 | 0,321575208 |
| MAP3K3   | -1,06204859  | 4,395871186 | 0,050472998 | 0,322141341 |
| FKBP3    | 1,220094039  | 6,033561436 | 0,050491012 | 0,322141341 |
| PLXND1   | -0,974395384 | 6,952535152 | 0,05050256  | 0,322141341 |
| MEIS3P1  | 1,640462306  | 6,921553589 | 0,050548649 | 0,322141341 |
| HRSP12   | 1,531456832  | 5,484893761 | 0,050661262 | 0,32255756  |
| ARAP1    | -0,77845049  | 7,25507785  | 0,050713297 | 0,322587658 |
| KDM5C    | -0,834632029 | 6,485317808 | 0,050874747 | 0,32331305  |
| TMEM175  | -0,966187685 | 4,773786677 | 0,051040927 | 0,324067117 |
| FADD     | 1,141295342  | 5,63928835  | 0,051180866 | 0,324653327 |
| SBF2     | -0,778422052 | 6,468314241 | 0,051340104 | 0,325360754 |
| CCNL1    | -0,958961074 | 4,936553776 | 0,051416206 | 0,325540488 |
| FBL      | 1,264982042  | 8,269404495 | 0,051552862 | 0,325574843 |
| SRPK1    | 1,225366219  | 6,228253851 | 0,051617597 | 0,325574843 |
| AGXT2L2  | -0,90434018  | 5,647847896 | 0,051652951 | 0,325574843 |
| FBXO11   | -0,781172965 | 6,538065042 | 0,051704043 | 0,325574843 |
| KIAA0922 | -0,845527703 | 5,649802196 | 0,051738101 | 0,325574843 |
| PTAR1    | -0,943138959 | 4,463676159 | 0,051774606 | 0,325574843 |
| CEP78    | 1,107601873  | 4,745709296 | 0,051816906 | 0,325574843 |
| NOB1     | 0,928446359  | 6,001283633 | 0,05185966  | 0,325574843 |
| CST3     | -0,866138012 | 10,13115775 | 0,051881387 | 0,325574843 |
| TUBB2A   | 1,387191282  | 6,064272664 | 0,051899084 | 0,325574843 |
| CCNC     | 1,150804934  | 6,983955264 | 0,052011164 | 0,325685536 |
| ARHGAP5  | 1,089244647  | 7,017904349 | 0,052012252 | 0,325685536 |
| PTPLAD1  | 1,083619971  | 5,849906934 | 0,052131556 | 0,326133103 |
| ETFDH    | -0,832832972 | 3,990354337 | 0,052209775 | 0,326323057 |
| TTC27    | 0,961276803  | 3,224112617 | 0,052299677 | 0,326450143 |
| TMEM204  | -1,101860621 | 6,53159276  | 0,052325855 | 0,326450143 |

|          |              |             |             |             |
|----------|--------------|-------------|-------------|-------------|
| NIPSNAP1 | 1,360665878  | 5,621790679 | 0,052460083 | 0,3269884   |
| NDUFB9   | 1,1055826    | 8,452977989 | 0,052570831 | 0,3272823   |
| SPATS2   | 1,139584314  | 4,451795009 | 0,052603226 | 0,3272823   |
| CABLES1  | -0,992636496 | 4,626303374 | 0,052655847 | 0,32731105  |
| TOP1     | 1,152223589  | 7,021089824 | 0,052718799 | 0,32740391  |
| ZHX2     | -0,937739015 | 5,917742689 | 0,052934583 | 0,328444876 |
| INSR     | -0,861903369 | 5,847057732 | 0,053034279 | 0,328552569 |
| TYMS     | 1,344520343  | 7,004839345 | 0,053048303 | 0,328552569 |
| MSL3     | 1,040072752  | 5,742186609 | 0,053130564 | 0,328763444 |
| PLCB2    | -0,95360342  | 5,886890001 | 0,053240498 | 0,329145021 |
| NDRG1    | 1,416389026  | 9,619786655 | 0,053433885 | 0,329534887 |
| MED17    | 1,178618034  | 5,683466584 | 0,053505607 | 0,329534887 |
| PRELP    | -1,577395468 | 7,790128384 | 0,053517494 | 0,329534887 |
| ZNF669   | 1,331912715  | 4,525421298 | 0,053537841 | 0,329534887 |
| RCC1     | 1,190364196  | 4,512239173 | 0,053545191 | 0,329534887 |
| FANCE    | 1,532068663  | 5,873418753 | 0,053645899 | 0,329856976 |
| DDAH1    | -1,087681669 | 6,070195038 | 0,053778897 | 0,330318686 |
| STON2    | -1,046350748 | 4,692197431 | 0,053817871 | 0,330318686 |
| RUSC1    | 0,957438246  | 6,452097002 | 0,054118052 | 0,331801454 |
| ANKRD50  | -0,882211929 | 6,320844141 | 0,05415677  | 0,331801454 |
| SNRPG    | 0,941616215  | 7,521687585 | 0,054358068 | 0,332461098 |
| ABCE1    | 1,814709953  | 7,91598525  | 0,054361948 | 0,332461098 |
| N4BP1    | -0,827912783 | 4,101045314 | 0,054611244 | 0,333426857 |
| CCNDBP1  | -0,942138177 | 5,488968424 | 0,054617656 | 0,333426857 |
| SEC11C   | -0,892432823 | 6,773863273 | 0,054689121 | 0,333564502 |
| FAM100A  | -0,759864837 | 6,042832671 | 0,054784755 | 0,333725414 |
| GOLIM4   | 0,956264854  | 6,974222613 | 0,054818874 | 0,333725414 |
| KIAA1919 | -0,875458579 | 4,187767573 | 0,054862324 | 0,333725414 |
| TM9SF3   | -0,848369491 | 6,603524888 | 0,054933738 | 0,333861997 |
| RSRC1    | 1,358977734  | 5,384482005 | 0,055008364 | 0,334017842 |
| NET1     | 1,084261457  | 6,170324347 | 0,055086677 | 0,334195772 |
| SYNE2    | -0,930036813 | 5,463288741 | 0,055148994 | 0,334221146 |
| DCUN1D3  | -0,771339619 | 5,642315613 | 0,055188885 | 0,334221146 |
| UAP1     | 1,137835176  | 6,700774415 | 0,055277282 | 0,334459439 |
| EFNB2    | 1,125006516  | 5,938490764 | 0,055349915 | 0,334602011 |
| GFPT1    | 0,882508564  | 6,189991413 | 0,055435885 | 0,33482489  |
| ZC3H8    | 1,075318773  | 3,818135737 | 0,055551328 | 0,335191953 |
| EIF4A3   | 0,875932387  | 6,537725208 | 0,05559497  | 0,335191953 |
| COPS3    | 0,978182874  | 6,599160318 | 0,056220371 | 0,338663173 |
| ENY2     | 1,427246744  | 7,760759421 | 0,056594477 | 0,340433914 |
| RUVBL1   | 1,024303818  | 5,478743818 | 0,056642365 | 0,340433914 |
| NIF3L1   | 0,956392273  | 4,541486924 | 0,056664099 | 0,340433914 |
| PSMB7    | 0,955233168  | 7,532811351 | 0,056820299 | 0,341071846 |
| CHCHD2   | 1,145524646  | 10,03414754 | 0,056954211 | 0,341376947 |
| MPHOSPH6 | 1,148023431  | 5,211737136 | 0,056971252 | 0,341376947 |
| IARS     | 1,066186291  | 7,944228843 | 0,057169228 | 0,34216277  |
| NFE2L3   | 1,679762822  | 4,648285569 | 0,057288057 | 0,34216277  |
| NUCB1    | -0,820535737 | 8,42404272  | 0,057323781 | 0,34216277  |
| RNF169   | -0,765053418 | 5,064246635 | 0,057335304 | 0,34216277  |
| CCT3     | 0,982852102  | 7,474759008 | 0,057353284 | 0,34216277  |



|           |              |             |             |             |
|-----------|--------------|-------------|-------------|-------------|
| B4GALT4   | 1,086666663  | 5,065391187 | 0,05750139  | 0,34262747  |
| HIST4H4   | 1,292229945  | 3,414462078 | 0,057531669 | 0,34262747  |
| ACOT7     | 1,287325057  | 5,063686464 | 0,057601486 | 0,342707446 |
| MLH3      | -0,851910103 | 4,52884305  | 0,057650435 | 0,342707446 |
| PSMD2     | 1,07974846   | 7,536336814 | 0,057712449 | 0,342707446 |
| SLC23A2   | -0,991974948 | 5,094052915 | 0,057748255 | 0,342707446 |
| NUCKS1    | 0,954248119  | 9,443789052 | 0,057796387 | 0,342707446 |
| LRRC59    | 1,089606977  | 7,874651889 | 0,057859734 | 0,342784993 |
| B2M       | -1,061340283 | 11,37062321 | 0,058325085 | 0,344569203 |
| BCL6      | -0,943532341 | 6,801975248 | 0,058358589 | 0,344569203 |
| CDK6      | 1,195327771  | 7,267733862 | 0,05836431  | 0,344569203 |
| KPTN      | 0,967875919  | 3,076913162 | 0,058373313 | 0,344569203 |
| CITED4    | -1,118860624 | 4,60137489  | 0,05841355  | 0,344569203 |
| PTPRM     | -1,053240034 | 5,407678094 | 0,058550596 | 0,345079096 |
| HIF1A     | 1,234071037  | 8,005287671 | 0,058634308 | 0,345274045 |
| SRRM2     | -0,783880066 | 9,110538434 | 0,058693163 | 0,345322413 |
| DCAF11    | -0,697892715 | 4,931353272 | 0,05909584  | 0,347391838 |
| HOXA5     | -1,374270419 | 5,375585156 | 0,059227522 | 0,347866043 |
| KIAA0907  | 1,525842152  | 6,263521259 | 0,059369263 | 0,348209734 |
| TMED10    | -0,795856694 | 7,683492145 | 0,059388168 | 0,348209734 |
| CD200     | -0,893046522 | 5,025460547 | 0,059484043 | 0,348472243 |
| C5orf51   | 1,093446231  | 5,714178905 | 0,059589997 | 0,348543745 |
| PSME3     | 0,942279786  | 6,522340447 | 0,059598476 | 0,348543745 |
| MARCH8    | -0,816065951 | 4,002045345 | 0,059767365 | 0,349061682 |
| DAP3      | 1,077927542  | 7,076162768 | 0,059789419 | 0,349061682 |
| BCAT1     | 1,057310051  | 6,785473965 | 0,059976432 | 0,349752143 |
| DDX17     | -0,691894436 | 8,602119993 | 0,06003848  | 0,349752143 |
| PHTF2     | 1,101921552  | 5,190715023 | 0,060061557 | 0,349752143 |
| CRISPLD2  | -1,148285818 | 6,60926426  | 0,06040511  | 0,351452597 |
| TROVE2    | -0,89036668  | 6,119099984 | 0,060495444 | 0,351678121 |
| LAMB2     | -0,920375354 | 6,83730251  | 0,060594729 | 0,351955242 |
| C14orf166 | 1,09307081   | 9,00380405  | 0,060714767 | 0,352352338 |
| ADRM1     | 0,963304742  | 7,59678118  | 0,060826819 | 0,352407328 |
| IRS2      | -0,918926169 | 4,881747951 | 0,060827603 | 0,352407328 |
| DNAJB11   | 1,025355126  | 8,137959677 | 0,060932373 | 0,352714643 |
| FAM8A1    | -0,865165118 | 3,984370989 | 0,061052812 | 0,353112066 |
| VPS13D    | -0,806285226 | 5,195126809 | 0,061122727 | 0,353139363 |
| UNG       | 0,968549168  | 4,717219233 | 0,061161107 | 0,353139363 |
| TEX10     | 0,965486213  | 4,962643299 | 0,061326918 | 0,353505269 |
| NCOA7     | -0,751960323 | 4,664780865 | 0,061328162 | 0,353505269 |
| MCM6      | 0,939781487  | 5,534463897 | 0,061524692 | 0,354338575 |
| SYNJ2     | 1,06982406   | 5,06320381  | 0,061642471 | 0,354717306 |
| LLGL1     | 1,330085072  | 5,501497611 | 0,061835567 | 0,355528444 |
| ITGB1     | 1,099162557  | 10,3390347  | 0,061982484 | 0,35607292  |
| ABI3      | -1,008625211 | 6,174851573 | 0,062071403 | 0,356078745 |
| TXNIP     | -1,038733044 | 9,241306648 | 0,062087935 | 0,356078745 |
| TRIB3     | 1,682948511  | 6,219061337 | 0,062195458 | 0,356395651 |
| RPS9      | -0,804975629 | 8,476653247 | 0,062298987 | 0,356689164 |
| JMJD1C    | -0,843173044 | 4,788370108 | 0,062370728 | 0,35680033  |
| TGFB2     | 1,428190934  | 6,163028855 | 0,062578799 | 0,357361782 |

|          |              |             |             |             |
|----------|--------------|-------------|-------------|-------------|
| VAMP8    | -0,910919381 | 7,042647977 | 0,062591221 | 0,357361782 |
| PSAP     | -0,850638126 | 10,70575692 | 0,062626093 | 0,357361782 |
| ODC1     | 1,224636923  | 8,148607604 | 0,062690151 | 0,35742821  |
| MMP14    | 1,171845721  | 9,475808758 | 0,062847407 | 0,358025454 |
| KLF11    | -0,884822831 | 4,75742809  | 0,06290294  | 0,358042695 |
| CYP7B1   | -0,950009173 | 4,082948104 | 0,063061672 | 0,358148566 |
| PSPC1    | 1,235121719  | 4,736316998 | 0,063062977 | 0,358148566 |
| ZNF551   | 1,19036569   | 2,537928338 | 0,0631428   | 0,358148566 |
| SLBP     | 1,080975353  | 6,897849696 | 0,063146314 | 0,358148566 |
| ZNF772   | 1,401515332  | 4,036853376 | 0,063234712 | 0,358148566 |
| CLNS1A   | 1,313177447  | 7,753810846 | 0,063236673 | 0,358148566 |
| GCA      | -0,943853892 | 4,360634818 | 0,063369706 | 0,358570276 |
| ALDH18A1 | 1,172092617  | 6,280077547 | 0,0634325   | 0,358570276 |
| CLK1     | -0,757641605 | 6,791088392 | 0,063468884 | 0,358570276 |
| VDAC1    | 0,932223821  | 7,879447105 | 0,063617851 | 0,358945978 |
| IGF2BP2  | 1,508768685  | 5,450802034 | 0,063640664 | 0,358945978 |
| GUF1     | 1,213531964  | 4,836699023 | 0,063726319 | 0,35913204  |
| PPA1     | 1,176527427  | 8,202848876 | 0,063890236 | 0,359758479 |
| CUL7     | 1,353085572  | 5,903174653 | 0,064348563 | 0,361940862 |
| POLA1    | 1,025763284  | 5,535562488 | 0,064408981 | 0,361940862 |
| TNC      | 1,737707896  | 9,372408348 | 0,064449221 | 0,361940862 |
| RPS28    | -0,952419722 | 10,70075889 | 0,064490123 | 0,361940862 |
| MRPS16   | 1,005237647  | 7,039913173 | 0,064856635 | 0,363527584 |
| POSTN    | 2,113144292  | 8,538642494 | 0,064879465 | 0,363527584 |
| ERH      | 0,837699777  | 8,586149401 | 0,065078212 | 0,364137982 |
| SLCO2A1  | -1,142203733 | 6,849108493 | 0,065140356 | 0,364137982 |
| CCDC90A  | 1,079630744  | 7,055875347 | 0,065187644 | 0,364137982 |
| CCDC51   | 1,086134063  | 3,166057835 | 0,065202006 | 0,364137982 |
| CNOT1    | 0,919756043  | 6,957231378 | 0,065293175 | 0,364348739 |
| MRPL12   | 1,057504977  | 5,736488618 | 0,065440041 | 0,364768297 |
| GPI      | 1,140725018  | 9,903279866 | 0,065497039 | 0,364768297 |
| UBE2M    | 0,941279685  | 7,254436234 | 0,06552884  | 0,364768297 |
| THOC2    | 0,922618592  | 6,181053233 | 0,065604282 | 0,364786324 |
| ZC3HC1   | 0,990647556  | 4,826507651 | 0,06563907  | 0,364786324 |
| AIDA     | 1,240105014  | 8,472606505 | 0,065811035 | 0,365444177 |
| MGC72080 | 0,872856756  | 4,537195205 | 0,065885099 | 0,365557763 |
| DHX33    | 1,129735544  | 4,726476572 | 0,066058087 | 0,366219589 |
| SMN1     | 0,872872445  | 6,421131173 | 0,066199569 | 0,366416879 |
| RNF7     | 1,02533325   | 7,815904453 | 0,066201143 | 0,366416879 |
| ANKH     | 1,431712425  | 5,696938002 | 0,06652324  | 0,36790103  |
| LMBRD2   | 1,04295885   | 4,247601022 | 0,066672662 | 0,367915307 |
| HSPA9    | 0,845579572  | 7,915691076 | 0,066684303 | 0,367915307 |
| RPN1     | 0,839037115  | 9,195572522 | 0,066693597 | 0,367915307 |
| RPL13    | 1,46972925   | 10,63033205 | 0,066741639 | 0,367915307 |
| C10orf76 | -0,708738902 | 5,301320057 | 0,066833906 | 0,368126337 |
| CPOX     | 0,926760298  | 3,992517333 | 0,066984412 | 0,368657553 |
| SNHG5    | 1,268276515  | 8,438963234 | 0,067178329 | 0,369208045 |
| PITRM1   | 1,358489536  | 6,105435768 | 0,067192724 | 0,369208045 |
| E2F5     | 1,603465669  | 5,138525315 | 0,067436089 | 0,370203754 |
| ARHGEF35 | 1,325347851  | 3,618727708 | 0,067482514 | 0,370203754 |

|            |              |             |             |             |
|------------|--------------|-------------|-------------|-------------|
| C7orf29    | 1,807510551  | 4,579174008 | 0,067750128 | 0,370897915 |
| DAG1       | -0,726695629 | 6,534587899 | 0,067761221 | 0,370897915 |
| SASS6      | 1,709899279  | 4,535666755 | 0,067800729 | 0,370897915 |
| FAM115A    | -0,799335944 | 4,863074596 | 0,067826617 | 0,370897915 |
| NASP       | 1,164479974  | 7,338529618 | 0,067953101 | 0,371151747 |
| LTBP4      | -1,5028795   | 8,465789233 | 0,067981893 | 0,371151747 |
| TMEM50B    | -0,764567923 | 4,315716232 | 0,068637787 | 0,374135497 |
| MICAL1     | -0,850075285 | 7,181814042 | 0,068638144 | 0,374135497 |
| NUP54      | 0,826483089  | 6,533765957 | 0,068796819 | 0,374628629 |
| PA2G4P4    | -0,835676268 | 2,261376469 | 0,068838491 | 0,374628629 |
| RBM12      | 1,374877     | 3,230703968 | 0,068995875 | 0,375155548 |
| PTP4A2     | 1,051536387  | 7,638505901 | 0,069053775 | 0,375155548 |
| VPS33A     | 1,005808528  | 4,898252023 | 0,069100362 | 0,375155548 |
| PDCD4      | -0,809130151 | 6,365606027 | 0,069181684 | 0,375298253 |
| RAP2C      | 1,037202408  | 5,134525695 | 0,069318139 | 0,375739578 |
| NDUF2F2    | 0,962692414  | 5,899352991 | 0,069955138 | 0,378891254 |
| LGALS3     | -0,997791177 | 8,012393485 | 0,070065955 | 0,378970741 |
| TBC1D13    | -0,800885473 | 5,096491981 | 0,070080966 | 0,378970741 |
| DRAM1      | -0,958219905 | 6,582738968 | 0,070458791 | 0,380557768 |
| AHR        | -0,94443929  | 7,437551962 | 0,070486063 | 0,380557768 |
| EXOSC2     | 1,00451775   | 6,296104411 | 0,07060537  | 0,380900331 |
| RBM34      | 0,947296368  | 5,800951883 | 0,070783009 | 0,38155679  |
| GTF2E2     | 0,840919123  | 5,125531681 | 0,070961756 | 0,382218179 |
| UQCRB      | 1,019049015  | 8,078175882 | 0,071206497 | 0,382801682 |
| RNF10      | -0,759283545 | 5,456471371 | 0,071218739 | 0,382801682 |
| TSPAN3     | -0,74501989  | 7,88087961  | 0,0712385   | 0,382801682 |
| CYC1       | 1,031036282  | 7,95140957  | 0,071305634 | 0,382860726 |
| KLHL21     | 1,095058803  | 5,104586285 | 0,071547732 | 0,383192199 |
| TMEM106C   | 1,034267287  | 6,682718302 | 0,071577672 | 0,383192199 |
| QARS       | -0,780373268 | 6,799344612 | 0,07161642  | 0,383192199 |
| NEAT1      | -0,986017161 | 11,30966782 | 0,071644347 | 0,383192199 |
| TSC22D3    | -0,93971237  | 7,87044281  | 0,071648343 | 0,383192199 |
| PLXNB1     | -1,16168353  | 5,98596588  | 0,071837096 | 0,383806927 |
| CASP3      | 1,116703693  | 6,073558059 | 0,071892248 | 0,383806927 |
| EID3       | 1,556358879  | 5,157509312 | 0,071932139 | 0,383806927 |
| SSFA2      | 1,061904986  | 7,966331575 | 0,072005921 | 0,383900214 |
| PRKCI      | 0,739007199  | 6,570251173 | 0,072151645 | 0,384226597 |
| CDKN2AIPNL | 1,16254901   | 6,009120218 | 0,072228916 | 0,384226597 |
| SNW1       | 0,940633848  | 7,210564696 | 0,072236178 | 0,384226597 |
| RBL2       | -0,874336286 | 6,468431293 | 0,072398406 | 0,384382988 |
| EIF2S3     | 1,001976779  | 9,099022501 | 0,072429224 | 0,384382988 |
| SDAD1      | 1,017690473  | 5,923841671 | 0,072458793 | 0,384382988 |
| RHBDD3     | 1,417677618  | 4,968753705 | 0,072491058 | 0,384382988 |
| MDC1       | 1,196029164  | 6,265200768 | 0,072567905 | 0,384491488 |
| ATG2B      | -0,744644167 | 5,491164263 | 0,072749793 | 0,385053734 |
| HAUS5      | 1,731686589  | 5,621225449 | 0,072842872 | 0,385053734 |
| RRAGC      | 0,920468257  | 6,429423839 | 0,072843425 | 0,385053734 |
| NIP7       | 0,948290195  | 5,045895292 | 0,073003993 | 0,385603583 |
| SCAMP2     | -0,805763943 | 6,653667481 | 0,073088431 | 0,385750782 |
| SIRPA      | -0,754515663 | 6,136996169 | 0,073256262 | 0,386108842 |

|          |              |             |             |             |
|----------|--------------|-------------|-------------|-------------|
| RAD23A   | 1,202041561  | 10,07064514 | 0,073269518 | 0,386108842 |
| HMGXB4   | 1,022325756  | 6,169941101 | 0,073464086 | 0,386835214 |
| TMEM109  | -0,775297126 | 6,295629129 | 0,073949724 | 0,388657863 |
| TWISTNB  | 0,912872934  | 4,962709317 | 0,073949988 | 0,388657863 |
| PPP2R5A  | -0,883108752 | 4,867644817 | 0,073981215 | 0,388657863 |
| PCIF1    | -0,720038299 | 6,383296135 | 0,074106918 | 0,389018535 |
| GTF3C6   | 1,089269666  | 6,388803263 | 0,074324575 | 0,389379233 |
| CHTF18   | 1,661417356  | 4,521778436 | 0,074431124 | 0,389379233 |
| DKK3     | -0,881923501 | 6,716571383 | 0,074440249 | 0,389379233 |
| CDC5L    | 0,908579333  | 6,43306267  | 0,074493817 | 0,389379233 |
| ARL1     | 0,764253976  | 8,141853191 | 0,074536348 | 0,389379233 |
| LATS2    | -0,967622555 | 4,80431773  | 0,074577245 | 0,389379233 |
| MKL2     | -0,777586602 | 5,878743164 | 0,074616681 | 0,389379233 |
| LDHB     | 1,132070486  | 8,737829249 | 0,074632447 | 0,389379233 |
| GMPR     | -0,869372727 | 3,761777547 | 0,074829255 | 0,389770141 |
| SMARCC1  | 1,005143056  | 6,888583774 | 0,074874601 | 0,389770141 |
| DHX37    | 1,060884788  | 5,160955726 | 0,074878851 | 0,389770141 |
| SPIN4    | 1,142192756  | 5,920782936 | 0,075075686 | 0,390496644 |
| C9orf116 | -1,02964321  | 4,029387063 | 0,075216823 | 0,390932559 |
| TCF4     | -0,921802527 | 5,297904047 | 0,075302003 | 0,391077198 |
| CCL5     | -1,078120448 | 7,068537777 | 0,075370158 | 0,391133263 |
| RALGDS   | -0,899075233 | 5,796665014 | 0,075428966 | 0,391140775 |
| OXCT1    | 1,305566656  | 5,870350061 | 0,075627545 | 0,391700122 |
| CARD8    | -0,913538643 | 5,451272735 | 0,075676241 | 0,391700122 |
| RNF115   | 0,87275071   | 6,388996108 | 0,07570916  | 0,391700122 |
| PUS7L    | 1,025980606  | 5,173183717 | 0,07578754  | 0,391734156 |
| HN1L     | 1,069124016  | 7,034237763 | 0,075886915 | 0,391734156 |
| UBTD1    | -0,764447832 | 5,271168324 | 0,075900236 | 0,391734156 |
| SSR1     | 1,103400108  | 9,018665004 | 0,076017852 | 0,391734156 |
| INTS4    | 0,913289991  | 5,876650695 | 0,07606318  | 0,391734156 |
| IMP4     | 1,058839026  | 6,193464205 | 0,076140151 | 0,391734156 |
| ZC3HAV1L | 1,128511284  | 4,798303722 | 0,076182576 | 0,391734156 |
| PFKFB2   | -0,782410239 | 4,775993728 | 0,076217651 | 0,391734156 |
| PEA15    | -0,86442664  | 6,763732162 | 0,076232765 | 0,391734156 |
| MTMR10   | -0,743366764 | 6,236889928 | 0,076316577 | 0,391851103 |
| ZNF302   | 1,186921674  | 5,229386518 | 0,076420991 | 0,391851103 |
| PRKAG1   | 1,125757675  | 5,132189098 | 0,076478549 | 0,391851103 |
| EEF1E1   | 1,267737376  | 6,247383814 | 0,076507005 | 0,391851103 |
| FAT1     | 1,286534722  | 6,521521735 | 0,076560387 | 0,391851103 |
| PRKAR1A  | -0,733486264 | 8,653135374 | 0,076600311 | 0,391851103 |
| TMED5    | -0,904276416 | 6,693712828 | 0,076792581 | 0,392357541 |
| STYXL1   | 0,917723411  | 6,145841029 | 0,076814389 | 0,392357541 |
| GLTSCR2  | -0,673554301 | 8,855694517 | 0,076882869 | 0,392413385 |
| SAT2     | -0,837815134 | 5,404814915 | 0,077015869 | 0,392798214 |
| STIP1    | 0,959566087  | 7,705081165 | 0,077086171 | 0,392855998 |
| ST13     | 0,914942903  | 8,783090026 | 0,077148318 | 0,392855998 |
| CKS1B    | 0,91566179   | 6,329801333 | 0,077200035 | 0,392855998 |
| AIMP2    | 0,935666784  | 5,583264486 | 0,077279312 | 0,392966165 |
| ERCC6    | -0,829016715 | 3,576960831 | 0,077413023 | 0,393352758 |
| SCARB2   | -0,703906766 | 7,858719315 | 0,077660673 | 0,394317299 |

|            |              |             |             |             |
|------------|--------------|-------------|-------------|-------------|
| TIGD1      | 1,001562089  | 4,301241492 | 0,077811254 | 0,394609676 |
| FMR1       | 0,964361938  | 5,32889585  | 0,077931736 | 0,394609676 |
| CDKN1B     | -0,71696435  | 5,685893064 | 0,077962887 | 0,394609676 |
| FAM60A     | 1,003902169  | 6,46711947  | 0,077969233 | 0,394609676 |
| TMCO7      | -0,791513547 | 4,508651001 | 0,078022549 | 0,394609676 |
| BAIAP2L1   | 1,253612335  | 5,831284635 | 0,078065472 | 0,394609676 |
| FYCO1      | -0,758573364 | 6,079708732 | 0,078161934 | 0,394804614 |
| SNAP47     | 1,025565838  | 4,6122401   | 0,078237293 | 0,394892749 |
| MTX2       | 0,926675257  | 6,25664325  | 0,078370691 | 0,394989135 |
| TINF2      | -0,698479673 | 3,570006912 | 0,078375729 | 0,394989135 |
| VEGFC      | 1,621095587  | 6,392281173 | 0,078506128 | 0,394989135 |
| GTF2H3     | 0,888810977  | 4,736124987 | 0,078541308 | 0,394989135 |
| SERPINE2   | 1,86868217   | 6,971002161 | 0,078584302 | 0,394989135 |
| ACIN1      | -0,700390871 | 6,303465262 | 0,078643685 | 0,394989135 |
| AHNAK      | -0,73212519  | 7,327295716 | 0,078701336 | 0,394989135 |
| FKBP14     | 1,154625535  | 5,097536774 | 0,078775461 | 0,394989135 |
| CLPTM1L    | 0,894578619  | 7,474419407 | 0,078777713 | 0,394989135 |
| FXR1       | 0,971493313  | 7,814532063 | 0,078884249 | 0,39523269  |
| GSPT1      | 0,981152719  | 8,072254816 | 0,079271117 | 0,396879401 |
| RPL7L1     | 0,909692846  | 6,55545964  | 0,079378589 | 0,397125897 |
| AP2M1      | 1,031400684  | 9,159789611 | 0,079632176 | 0,397249244 |
| LMNB1      | 1,298702354  | 4,780657174 | 0,079761551 | 0,397249244 |
| LAMA5      | -0,8472922   | 6,878872187 | 0,079780704 | 0,397249244 |
| AZIN1      | 0,864099052  | 7,434739274 | 0,079936763 | 0,397249244 |
| TMEM63B    | -0,922950126 | 5,977049148 | 0,07994652  | 0,397249244 |
| FBXO8      | -0,856591723 | 4,463740476 | 0,080053379 | 0,397249244 |
| POFUT1     | 1,151184173  | 6,622695844 | 0,080065918 | 0,397249244 |
| S100A16    | 1,338091221  | 7,571560196 | 0,080080511 | 0,397249244 |
| RSF1       | 1,010444122  | 6,012288738 | 0,080200376 | 0,397249244 |
| SLC9A1     | -0,688117335 | 5,810905535 | 0,080280595 | 0,397249244 |
| ZNF592     | -0,716321892 | 5,344316466 | 0,080350059 | 0,397249244 |
| DYNC2LI1   | -0,722038788 | 5,164825379 | 0,080359155 | 0,397249244 |
| FAM114A1   | 0,997546081  | 6,318158172 | 0,080359813 | 0,397249244 |
| RNF8       | 1,063108506  | 4,613352709 | 0,080371752 | 0,397249244 |
| MMP2       | -1,087545124 | 9,451516389 | 0,080377593 | 0,397249244 |
| CHST11     | 0,976746624  | 6,89549149  | 0,080381863 | 0,397249244 |
| CDKN1C     | -0,900636382 | 4,378265269 | 0,0803936   | 0,397249244 |
| SMN2       | 1,225030834  | 5,018503316 | 0,080544485 | 0,397249431 |
| DNAJC3     | -0,764670123 | 5,885562924 | 0,080596863 | 0,397249431 |
| FAM57A     | 1,140760557  | 5,811602049 | 0,080678481 | 0,397249431 |
| TTBK2      | -0,71107233  | 4,299594185 | 0,080688147 | 0,397249431 |
| SLC11A2    | -0,833237577 | 4,962905284 | 0,080761358 | 0,397249431 |
| PRPF4      | 1,019549733  | 4,612903163 | 0,080774382 | 0,397249431 |
| TUBG1      | 0,937483034  | 6,696627553 | 0,080801431 | 0,397249431 |
| PAR-SN     | -0,951794194 | 4,972777988 | 0,080953079 | 0,397598371 |
| DCUN1D5    | 1,046146724  | 5,406131905 | 0,080992187 | 0,397598371 |
| CHD1       | 0,815312461  | 6,615460694 | 0,081047329 | 0,397598371 |
| OXSM       | 1,103896105  | 3,770156131 | 0,081259151 | 0,398145425 |
| ST6GALNAC4 | -0,90698244  | 4,723984594 | 0,08131722  | 0,398145425 |
| FAM98A     | 0,824473116  | 5,957556395 | 0,081417381 | 0,398145425 |

|          |              |             |             |             |
|----------|--------------|-------------|-------------|-------------|
| C15orf48 | 1,714381905  | 6,873953022 | 0,081438374 | 0,398145425 |
| GLG1     | 1,006925723  | 5,622604785 | 0,08145078  | 0,398145425 |
| RALGPS2  | 1,10110262   | 4,366583536 | 0,08162952  | 0,398459529 |
| ADCK2    | 0,73487068   | 5,700165777 | 0,081631905 | 0,398459529 |
| CHCHD3   | 0,981164982  | 6,753261426 | 0,081903001 | 0,398792203 |
| ERCC5    | -0,854255965 | 5,737923342 | 0,081945564 | 0,398792203 |
| SLC25A43 | 1,057400378  | 4,983802805 | 0,081976941 | 0,398792203 |
| MFN1     | 1,057490177  | 5,154163209 | 0,081989728 | 0,398792203 |
| YIF1A    | 0,898740603  | 6,655160227 | 0,082017888 | 0,398792203 |
| ARHGDIB  | -0,842987907 | 8,204798858 | 0,082050955 | 0,398792203 |
| FAM76A   | -0,747366187 | 4,927585891 | 0,082305193 | 0,398960319 |
| EPHA4    | -0,874747759 | 4,174638708 | 0,082311971 | 0,398960319 |
| LSM14B   | 0,77308564   | 6,109296985 | 0,082333223 | 0,398960319 |
| PRKAB1   | -0,798046073 | 6,948285203 | 0,082341131 | 0,398960319 |
| TOMM40   | 1,065323906  | 6,567338545 | 0,08237808  | 0,398960319 |
| PTPN13   | -1,019293439 | 5,021378076 | 0,082580063 | 0,399041575 |
| POLD2    | 1,086941897  | 7,57789588  | 0,082641416 | 0,399041575 |
| KIAA1462 | -0,940666006 | 7,526617169 | 0,08266872  | 0,399041575 |
| MAPKAPK5 | 1,108218869  | 6,994725359 | 0,082710406 | 0,399041575 |
| CHAF1A   | 1,272402319  | 4,739574971 | 0,082726232 | 0,399041575 |
| LSM2     | 0,916617631  | 6,964387696 | 0,082764077 | 0,399041575 |
| AKR1B1   | 0,953354333  | 6,759549401 | 0,082851194 | 0,399041575 |
| EIF4A1   | 0,852132198  | 10,27072606 | 0,082878492 | 0,399041575 |
| NICN1    | -0,832500519 | 3,836920721 | 0,082973868 | 0,399041575 |
| KDM3A    | 0,831204942  | 5,862527735 | 0,082980049 | 0,399041575 |
| TRRAP    | 0,964538281  | 7,681084442 | 0,083278154 | 0,400159485 |
| DNAJC11  | 0,844991222  | 5,683130606 | 0,083338737 | 0,400159485 |
| LETMD1   | -0,804475031 | 4,375395148 | 0,083388566 | 0,400159485 |
| ANAPC1   | 0,941610658  | 6,067088048 | 0,083497205 | 0,400399047 |
| UQCRH    | 0,85418491   | 7,642262663 | 0,083703379 | 0,40110565  |
| DYNC1LI1 | 0,987896959  | 6,279188777 | 0,083946163 | 0,401614949 |
| GABPB1   | 0,998524966  | 5,038607903 | 0,083971235 | 0,401614949 |
| FAM122B  | 1,003943678  | 6,889834602 | 0,08398635  | 0,401614949 |
| POLD1    | 0,996584149  | 5,128611832 | 0,084364363 | 0,403139868 |
| EDC3     | 0,856117941  | 5,367142922 | 0,084512686 | 0,403393709 |
| OBFC1    | -0,806060131 | 4,985351697 | 0,084535798 | 0,403393709 |
| TRIM37   | 0,76199915   | 5,397649909 | 0,084630131 | 0,403533984 |
| SLC3A2   | 0,878146517  | 6,775035318 | 0,084683551 | 0,403533984 |
| KLF3     | -0,613348838 | 5,960741156 | 0,084800492 | 0,403654515 |
| NID2     | -0,895200804 | 6,054525539 | 0,084858376 | 0,403654515 |
| NRAS     | 0,934068935  | 6,170379353 | 0,084886431 | 0,403654515 |
| OSBPL10  | 1,188277682  | 6,108095988 | 0,085038357 | 0,404095159 |
| FAM168A  | -0,710320054 | 5,633961261 | 0,085137894 | 0,404286422 |
| ATP6V0B  | -0,822755877 | 6,038530235 | 0,085251791 | 0,404545553 |
| NCSTN    | -0,763705867 | 6,12567786  | 0,085594297 | 0,405888393 |
| RBM23    | -0,793467153 | 4,978615813 | 0,085669104 | 0,405960821 |
| TMEM231  | -0,912444056 | 3,668673725 | 0,085783339 | 0,405997325 |
| ZNF317   | 1,059634095  | 4,69361341  | 0,085795886 | 0,405997325 |
| SPA17    | 1,117424417  | 4,358692256 | 0,085963586 | 0,4065088   |
| POLM     | 0,850604083  | 3,611309213 | 0,086125511 | 0,406898804 |

|          |              |             |             |             |
|----------|--------------|-------------|-------------|-------------|
| C16orf88 | 0,885955167  | 4,843316687 | 0,086196705 | 0,406898804 |
| POLR3F   | 0,816909784  | 4,208630613 | 0,086293095 | 0,406898804 |
| RNF166   | -0,793401215 | 4,484353987 | 0,086362543 | 0,406898804 |
| WDR5     | 0,701623236  | 5,393039101 | 0,086482088 | 0,406898804 |
| ITGA9    | -0,996509835 | 6,758092097 | 0,086566934 | 0,406898804 |
| NFU1     | 1,003831413  | 6,359906422 | 0,086638569 | 0,406898804 |
| FDFT1    | -0,855023338 | 5,514761714 | 0,086655471 | 0,406898804 |
| SCFD1    | 1,046463189  | 7,841918855 | 0,086684982 | 0,406898804 |
| ME1      | 1,354853125  | 6,035708219 | 0,086694034 | 0,406898804 |
| PSMD11   | 0,802718556  | 7,192253668 | 0,086718165 | 0,406898804 |
| MLL5     | -0,65493957  | 7,171996461 | 0,086762115 | 0,406898804 |
| FBF1     | 1,511857623  | 5,576186527 | 0,086839446 | 0,406981567 |
| LEO1     | 1,114986505  | 5,63636687  | 0,086915227 | 0,407056958 |
| CD276    | 1,196070842  | 4,793663637 | 0,087328461 | 0,408534055 |
| H19      | 2,462244592  | 11,08939098 | 0,08735044  | 0,408534055 |
| NOL11    | 1,000438269  | 6,624871307 | 0,087635209 | 0,409341186 |
| BSCL2    | -0,752030787 | 5,801241338 | 0,087681819 | 0,409341186 |
| UCP2     | -0,750264302 | 6,94670369  | 0,08771657  | 0,409341186 |
| DDB2     | -0,743672176 | 5,563178568 | 0,087763134 | 0,409341186 |
| PRPF31   | 0,802651946  | 6,660098309 | 0,087850155 | 0,409368931 |
| NINJ2    | -0,986910825 | 5,211115091 | 0,08788915  | 0,409368931 |
| AZI2     | -0,649134784 | 3,659622441 | 0,087959942 | 0,409419006 |
| ZNF544   | 0,942506243  | 5,318830558 | 0,088055905 | 0,40953402  |
| CCT8     | 0,94255702   | 7,768665958 | 0,088104767 | 0,40953402  |
| STX3     | -0,871458435 | 3,375573087 | 0,088190458 | 0,409653089 |
| SCD      | -0,936688072 | 9,098593381 | 0,088411366 | 0,410194105 |
| COPS2    | 0,73195011   | 7,516985678 | 0,088427238 | 0,410194105 |
| MPHOSPH8 | -0,962926567 | 5,207317746 | 0,088642529 | 0,41091326  |
| CTNNA1   | -0,822690772 | 8,189838841 | 0,088816065 | 0,411438009 |
| HSF1     | 1,294665732  | 7,856827733 | 0,089001533 | 0,412017279 |
| EMG1     | 0,889023947  | 7,06038398  | 0,089162022 | 0,41210718  |
| PRKAR2B  | -0,911952692 | 4,248191482 | 0,089250291 | 0,41210718  |
| RBPMS    | -1,120522598 | 6,75026219  | 0,089324227 | 0,41210718  |
| L2HGDH   | 1,315601813  | 4,07475443  | 0,089338293 | 0,41210718  |
| ARHGEF17 | -0,947692243 | 6,688696837 | 0,08942468  | 0,41210718  |
| COQ2     | -0,75834061  | 5,270955901 | 0,089469293 | 0,41210718  |
| SMPD4    | 0,895830003  | 6,544387723 | 0,089488028 | 0,41210718  |
| CD83     | -0,979248073 | 5,353743122 | 0,089504434 | 0,41210718  |
| ABCF2    | 0,899582794  | 6,600734838 | 0,089760808 | 0,413008737 |
| C4orf46  | 0,977882198  | 3,704959733 | 0,090097245 | 0,413816572 |
| DHX57    | 0,757824416  | 4,535478164 | 0,090155025 | 0,413816572 |
| ISG20L2  | 0,886559702  | 6,889393718 | 0,09018786  | 0,413816572 |
| ATP5O    | 0,792559425  | 7,973819871 | 0,090203106 | 0,413816572 |
| ATP5L    | 1,0493241    | 10,24485024 | 0,090239807 | 0,413816572 |
| SENP3    | -0,63101542  | 6,223472201 | 0,090511027 | 0,414781378 |
| CDC42EP4 | -0,819258213 | 5,350420947 | 0,09062037  | 0,41500356  |
| TPCN1    | -0,789253807 | 5,700071469 | 0,090696904 | 0,415075293 |
| ZNF282   | 0,901614256  | 5,688551201 | 0,090955033 | 0,415977443 |
| CRBN     | -0,836065462 | 5,21777887  | 0,09108318  | 0,416284317 |
| MUS81    | 1,071093122  | 6,60762534  | 0,0912529   | 0,416780661 |

|          |              |             |             |             |
|----------|--------------|-------------|-------------|-------------|
| NAPG     | 0,814424421  | 6,11708615  | 0,091448898 | 0,417396277 |
| FJX1     | 1,025810896  | 5,494136608 | 0,091728347 | 0,418391706 |
| ESF1     | 0,905264474  | 5,981485448 | 0,091868605 | 0,418596847 |
| PLEKHO1  | 0,959658095  | 4,632046611 | 0,091939258 | 0,418596847 |
| TRIM26   | -0,704420817 | 5,255782306 | 0,091957483 | 0,418596847 |
| CRIP1    | -1,04319251  | 8,629581581 | 0,092081269 | 0,418880704 |
| EIF5A    | 0,867839075  | 9,795689705 | 0,092230272 | 0,418986259 |
| SF3B14   | 0,861639752  | 6,808789947 | 0,092397763 | 0,418986259 |
| FUT10    | -0,886142923 | 4,725198691 | 0,092399618 | 0,418986259 |
| EZR      | -0,778403353 | 8,203712692 | 0,092404532 | 0,418986259 |
| FCGR3A   | -0,852316234 | 6,521089192 | 0,092487371 | 0,418986259 |
| MRPL3    | 0,95468656   | 6,783176663 | 0,092523535 | 0,418986259 |
| CEP170   | 0,915599199  | 5,657655578 | 0,092534581 | 0,418986259 |
| TH1L     | 0,97747566   | 7,067678981 | 0,092667414 | 0,419309289 |
| CDK7     | 1,025382738  | 6,179005599 | 0,092917642 | 0,420162731 |
| COL1A2   | 1,054718208  | 12,61268265 | 0,093022505 | 0,420291554 |
| MICB     | 1,158381252  | 3,972399723 | 0,093069401 | 0,420291554 |
| ZNF780B  | 1,706685782  | 5,423677725 | 0,093152851 | 0,420381649 |
| RHEB     | 0,87571399   | 8,79772622  | 0,093212649 | 0,420381649 |
| EXOSC3   | 0,830278857  | 5,939105394 | 0,093277522 | 0,420396181 |
| CEBPD    | -0,974166138 | 9,170074985 | 0,093389157 | 0,420621309 |
| RAB18    | 0,778373193  | 7,160296379 | 0,093625656 | 0,421133006 |
| PLP2     | 1,031662153  | 9,454250171 | 0,093626285 | 0,421133006 |
| PRPF39   | 0,888316428  | 4,910624551 | 0,0936971   | 0,421173716 |
| PNPLA6   | -0,853535501 | 5,908840243 | 0,093844317 | 0,421281655 |
| LSM12    | 0,876334842  | 7,932711504 | 0,09387908  | 0,421281655 |
| PABPC1   | 0,921659459  | 10,47151485 | 0,093906455 | 0,421281655 |
| BCL2L12  | 1,387919155  | 5,422490949 | 0,094263835 | 0,422586351 |
| POLR2J2  | 1,127798674  | 5,598826987 | 0,094321224 | 0,422586351 |
| B4GALT1  | 0,942894628  | 7,828185166 | 0,094410534 | 0,422708755 |
| TMEM183A | 0,774975745  | 5,872699455 | 0,094692054 | 0,42369102  |
| SLC29A1  | -0,800021969 | 6,704009515 | 0,09477878  | 0,423800986 |
| ATP6V1B2 | -0,730679364 | 6,075967463 | 0,094996044 | 0,424494119 |
| SLC16A1  | 1,227749817  | 5,619445204 | 0,095234812 | 0,425201003 |
| ZNF273   | 1,292415518  | 3,938460998 | 0,095340094 | 0,425201003 |
| EIF3M    | 1,057139556  | 7,580578401 | 0,095341301 | 0,425201003 |
| CSF2RB   | -0,892100342 | 5,747591138 | 0,095535124 | 0,425605756 |
| NAMPT    | 1,318022916  | 10,0339708  | 0,095556887 | 0,425605756 |
| SSH1     | -0,661386542 | 6,160362401 | 0,095786498 | 0,426349952 |
| LYAR     | 1,313677863  | 6,100863061 | 0,096068262 | 0,426474674 |
| MAP4K4   | 1,070147795  | 6,312496455 | 0,096103349 | 0,426474674 |
| B3GNT2   | -0,871706159 | 5,039319977 | 0,096118889 | 0,426474674 |
| PLEKHM3  | -0,86372824  | 5,287338361 | 0,09627731  | 0,426474674 |
| BRCA2    | 1,09135106   | 3,870902762 | 0,096327535 | 0,426474674 |
| GIMAP2   | -0,925862854 | 4,603962927 | 0,09634059  | 0,426474674 |
| VTI1A    | -0,801375652 | 4,305782866 | 0,096358405 | 0,426474674 |
| DDX31    | 1,019097508  | 4,317685856 | 0,096436124 | 0,426474674 |
| FBXO32   | 1,290599056  | 5,170368392 | 0,096459675 | 0,426474674 |
| ALDOC    | 1,481297937  | 5,564412884 | 0,096505145 | 0,426474674 |
| ADSS     | 0,755385202  | 6,065943372 | 0,096569702 | 0,426474674 |



|          |              |             |             |             |
|----------|--------------|-------------|-------------|-------------|
| PGAM5    | 0,803510686  | 6,078697176 | 0,096597685 | 0,426474674 |
| YRDC     | 0,7731334    | 4,47790663  | 0,096627566 | 0,426474674 |
| SNAI2    | 1,18270578   | 6,901759467 | 0,096872985 | 0,427281298 |
| VAMP2    | -0,86303668  | 8,935338037 | 0,097048281 | 0,427777781 |
| ERP29    | -0,849158327 | 7,360028975 | 0,097175816 | 0,428049648 |
| ANAPC7   | 0,925401686  | 6,411560198 | 0,097235504 | 0,428049648 |
| IMPAD1   | 0,766906045  | 7,587789373 | 0,097701963 | 0,429825604 |
| RREB1    | -0,659870691 | 6,298002489 | 0,098234859 | 0,431891361 |
| RPS4X    | 0,872605809  | 12,23096897 | 0,098300693 | 0,431902336 |
| H2AFZ    | 0,918059644  | 8,53955809  | 0,098420603 | 0,432150734 |
| SKAP1    | -0,894427923 | 3,439544415 | 0,098559022 | 0,432480033 |
| SMC3     | 0,913999092  | 6,181812685 | 0,098708932 | 0,432698496 |
| ANKFY1   | -0,639194233 | 5,274344105 | 0,098795097 | 0,432698496 |
| EIF3I    | 1,295331542  | 6,08321576  | 0,09881222  | 0,432698496 |
| TJP2     | -0,79957332  | 5,864202749 | 0,098891823 | 0,432698496 |
| ZNHIT3   | 0,89060196   | 4,83211507  | 0,098926082 | 0,432698496 |
| DSC2     | 1,209408975  | 6,241161063 | 0,099175279 | 0,433510404 |
| KRT17    | 3,996069106  | 10,07370214 | 0,099329017 | 0,433759813 |
| NCOR1    | 0,871771011  | 5,742615921 | 0,099359558 | 0,433759813 |
| FHOD1    | -0,807991717 | 4,338922525 | 0,099574737 | 0,434421067 |
| KDM6B    | -0,991365774 | 6,118761803 | 0,099837419 | 0,435170688 |
| XIAP     | 0,989271748  | 6,010625386 | 0,099874194 | 0,435170688 |
| TAF7     | 0,805747328  | 7,680334015 | 0,099953993 | 0,43524028  |
| SNX4     | 0,810542962  | 5,871406254 | 0,100397888 | 0,436894193 |
| SLC25A16 | -0,63579744  | 5,293289315 | 0,100494934 | 0,437037597 |
| KDELR2   | 0,802942941  | 9,406804341 | 0,10104914  | 0,439167679 |
| FUCA2    | 1,031082574  | 7,300812218 | 0,101116103 | 0,439178794 |
| TMEM87A  | -0,708520126 | 5,69463407  | 0,101275067 | 0,43958923  |
| RBM8A    | 1,041581977  | 7,523061096 | 0,101360514 | 0,439680243 |
| EIF3A    | 0,802634043  | 7,898998447 | 0,101572368 | 0,44031912  |
| GTF2F2   | 0,835528156  | 5,863570378 | 0,101637717 | 0,440322484 |
| SSX2IP   | 1,164489449  | 4,344183627 | 0,10174368  | 0,440501686 |
| SLC7A7   | -0,834018591 | 5,766970529 | 0,10192979  | 0,441027434 |
| ERMP1    | -0,84040526  | 4,063217872 | 0,102164491 | 0,441225959 |
| FAM53B   | -0,6542019   | 4,642983267 | 0,102171296 | 0,441225959 |
| UBA6     | 1,248403025  | 6,427765167 | 0,102211997 | 0,441225959 |
| IL10RA   | -0,806613926 | 6,067968271 | 0,102234494 | 0,441225959 |
| RPIA     | 0,917366711  | 6,313019962 | 0,102482794 | 0,442017819 |
| ENAH     | 1,267082423  | 8,815717292 | 0,102560396 | 0,442072909 |
| TTLL4    | 0,946152129  | 4,944412099 | 0,102864675 | 0,44254002  |
| KRAS     | 0,905936454  | 4,532334843 | 0,102916259 | 0,44254002  |
| AFF1     | -0,656329972 | 6,547980746 | 0,102923368 | 0,44254002  |
| LARGE    | -0,803814259 | 4,612786544 | 0,102928358 | 0,44254002  |
| PRKCA    | 0,903874978  | 6,634638881 | 0,103132075 | 0,442944211 |
| TCF7L2   | -0,79922539  | 5,480653753 | 0,103152281 | 0,442944211 |
| APOL4    | -1,037963201 | 4,889908399 | 0,10334562  | 0,443495143 |
| THUMPD3  | 0,97043041   | 4,833029309 | 0,103455545 | 0,443687648 |
| ARMC10   | 0,918996412  | 6,649228512 | 0,103784    | 0,444555635 |
| ELMOD3   | 0,948328916  | 5,046505937 | 0,103861387 | 0,444555635 |
| ATF1     | 0,992221783  | 5,748175856 | 0,103903123 | 0,444555635 |

|           |              |             |             |             |
|-----------|--------------|-------------|-------------|-------------|
| AMZ2      | 0,947977111  | 4,585423376 | 0,103927343 | 0,444555635 |
| GINS2     | 1,2601712    | 5,143042947 | 0,104143756 | 0,444555635 |
| ITFG2     | -0,776680565 | 6,210238306 | 0,10418381  | 0,444555635 |
| PDCD11    | 0,862972724  | 5,569534427 | 0,104185608 | 0,444555635 |
| POLE      | 1,005192813  | 6,02008996  | 0,104305505 | 0,444555635 |
| NOL6      | 0,936915408  | 4,580558697 | 0,10432138  | 0,444555635 |
| TXN       | 0,958016791  | 7,783008738 | 0,104366311 | 0,444555635 |
| RPP21     | 0,842928479  | 5,931530662 | 0,104567304 | 0,444555635 |
| DRG1      | 0,7635565    | 6,354936922 | 0,104623748 | 0,444555635 |
| RPRD2     | -0,705216878 | 5,67655629  | 0,104626612 | 0,444555635 |
| RPL22     | 0,887138394  | 5,364258577 | 0,104672713 | 0,444555635 |
| SEPHS2    | 0,890903676  | 6,548580482 | 0,104763669 | 0,444555635 |
| SH3BGRL   | -0,677051835 | 7,580067891 | 0,104927986 | 0,444555635 |
| NUP107    | 0,953217758  | 5,860074917 | 0,105127182 | 0,444555635 |
| RAD21     | 1,001379399  | 8,028439647 | 0,105228912 | 0,444555635 |
| DGCR6L    | 1,05373067   | 6,439679174 | 0,105257248 | 0,444555635 |
| PER1      | -1,135899258 | 6,990089087 | 0,105274588 | 0,444555635 |
| HSP90B1   | 0,887605525  | 10,09533739 | 0,10531772  | 0,444555635 |
| CDC34     | 1,017025219  | 6,485110151 | 0,105345383 | 0,444555635 |
| BCL2L11   | 1,006251053  | 5,386993048 | 0,10535974  | 0,444555635 |
| VCIPI1    | 0,856245352  | 6,278638408 | 0,10540402  | 0,444555635 |
| KIAA1147  | -0,651501853 | 5,502060333 | 0,105417279 | 0,444555635 |
| MGAT2     | 0,914737482  | 7,338629963 | 0,10541736  | 0,444555635 |
| FADS3     | -0,895059294 | 4,764906492 | 0,105418164 | 0,444555635 |
| MGST2     | -0,661830441 | 6,515164751 | 0,105550718 | 0,444839521 |
| USP47     | 0,797664518  | 7,168163084 | 0,10590526  | 0,446058042 |
| WSB2      | 0,822096839  | 7,526406572 | 0,106002258 | 0,446190986 |
| DAP       | 0,777657023  | 9,287596305 | 0,106091942 | 0,446292998 |
| CECR5     | 1,269673338  | 5,226667963 | 0,106340351 | 0,44646282  |
| PLEKHF2   | -0,687056219 | 5,61821131  | 0,106345134 | 0,44646282  |
| PFAS      | 1,167614834  | 5,150273246 | 0,106389038 | 0,44646282  |
| RNF168    | 0,879126184  | 6,007516747 | 0,106394205 | 0,44646282  |
| IER3      | 1,470957044  | 8,122151464 | 0,106512237 | 0,446622758 |
| F2R       | -0,946548425 | 5,131710999 | 0,10660613  | 0,446622758 |
| UBE2J2    | 0,769542987  | 6,909356351 | 0,106644466 | 0,446622758 |
| ARFGAP3   | -0,724533648 | 5,403959345 | 0,106694306 | 0,446622758 |
| C10orf116 | -1,190059397 | 7,365498376 | 0,106895543 | 0,447190618 |
| CTSZ      | -0,749213825 | 8,541779026 | 0,107048319 | 0,447301835 |
| CDK12     | 0,855118974  | 7,291733617 | 0,107091508 | 0,447301835 |
| TMEFF1    | 1,181991324  | 4,193861765 | 0,107118917 | 0,447301835 |
| FARP1     | -0,710437189 | 6,771910307 | 0,107258586 | 0,447442718 |
| FLYWCH1   | -0,730517924 | 5,383888216 | 0,107369738 | 0,447442718 |
| DCTN1     | -0,660624671 | 6,051727014 | 0,107379145 | 0,447442718 |
| SPRED1    | 1,092350322  | 7,009538087 | 0,107469388 | 0,447442718 |
| GDI2      | 0,799571915  | 9,074638876 | 0,107480741 | 0,447442718 |
| PABPN1    | 0,708669074  | 8,792739975 | 0,107555597 | 0,447481158 |
| STYX      | 0,804144883  | 6,443887974 | 0,10767997  | 0,447725435 |
| MAST4     | -0,898238465 | 6,975298968 | 0,107783457 | 0,44788263  |
| HMGB2     | 0,937124582  | 7,284201569 | 0,108008458 | 0,448544261 |
| RAB34     | 1,192113535  | 5,100223186 | 0,108148297 | 0,448851634 |

|          |              |             |             |             |
|----------|--------------|-------------|-------------|-------------|
| STIM2    | -0,64319141  | 4,275388337 | 0,108282463 | 0,449104121 |
| STAT6    | -0,656038412 | 7,044664728 | 0,108377255 | 0,449104121 |
| SGK196   | 1,100685149  | 5,224781363 | 0,108406714 | 0,449104121 |
| ACTR8    | -0,696106603 | 5,450226712 | 0,108538837 | 0,449378466 |
| DHX36    | 0,883183     | 6,27525212  | 0,108898615 | 0,45059445  |
| BRD7     | 0,799059997  | 6,951376393 | 0,109154642 | 0,45122141  |
| LGALS3BP | -0,731011427 | 7,805086943 | 0,109209824 | 0,45122141  |
| MRPL51   | 0,9364458    | 6,842878644 | 0,109248651 | 0,45122141  |
| RNF113A  | 1,109085245  | 5,396000112 | 0,109420427 | 0,451418662 |
| RPS18    | 0,818226006  | 10,05770849 | 0,1094506   | 0,451418662 |
| RNF2     | 0,934312321  | 6,037016246 | 0,109495009 | 0,451418662 |
| CDC42BPA | 0,862142491  | 6,941062142 | 0,109618159 | 0,451536039 |
| CPNE8    | 0,782625154  | 4,059271659 | 0,109655914 | 0,451536039 |
| PSMC1    | 0,70373968   | 8,012451498 | 0,109867178 | 0,452132945 |
| DCK      | 1,057209314  | 6,281622519 | 0,110057326 | 0,452642283 |
| SMC2     | 1,001000015  | 4,906465373 | 0,110304351 | 0,452975364 |
| EFTUD2   | 0,665796515  | 6,249899246 | 0,110323376 | 0,452975364 |
| SRRD     | 0,819623916  | 5,406948391 | 0,110337598 | 0,452975364 |
| PMF1     | -0,685732377 | 5,192820817 | 0,110568281 | 0,453594609 |
| MLH1     | 1,146131649  | 4,424783947 | 0,110659572 | 0,453594609 |
| CHMP2B   | -0,68556615  | 7,328356558 | 0,110687994 | 0,453594609 |
| MDM4     | -0,653475922 | 5,529907014 | 0,111091492 | 0,454974704 |
| C7orf13  | 1,348065275  | 6,408909884 | 0,111504105 | 0,456390451 |
| TSC2     | -0,57808829  | 5,765208334 | 0,111813952 | 0,457384127 |
| COL16A1  | -1,050729035 | 5,981140926 | 0,112006696 | 0,457897879 |
| TFDP1    | 0,861952659  | 6,220337916 | 0,11216899  | 0,458286606 |
| TPMT     | 1,1295153    | 5,655439226 | 0,112309814 | 0,45851151  |
| BMP1     | -0,671880799 | 5,404894793 | 0,112358518 | 0,45851151  |
| IL17RA   | -0,598606433 | 5,84439382  | 0,11258036  | 0,45914203  |
| RRS1     | 1,121773519  | 5,28834035  | 0,112942659 | 0,460108572 |
| SEPN1    | -0,791089352 | 7,257653574 | 0,112962361 | 0,460108572 |
| FTSJD2   | -0,720183884 | 4,880152797 | 0,113019777 | 0,460108572 |
| SIPA1L3  | 1,363996304  | 6,008963584 | 0,113215042 | 0,460434016 |
| PIGM     | -0,855500992 | 4,590864035 | 0,113234762 | 0,460434016 |
| MAGEF1   | 1,247020542  | 5,833660241 | 0,113400959 | 0,460835006 |
| RHOT2    | 0,855533451  | 6,183075387 | 0,113942318 | 0,462693955 |
| ALKBH1   | 0,92485798   | 4,067685715 | 0,113994111 | 0,462693955 |
| VAV3     | -0,893511439 | 4,393147013 | 0,1140927   | 0,462818632 |
| BCCIP    | 0,750775664  | 7,043909397 | 0,114342335 | 0,46355552  |
| INCENP   | 1,127407886  | 5,530318174 | 0,114802641 | 0,464497311 |
| NPC2     | -0,824855308 | 9,136620098 | 0,114829057 | 0,464497311 |
| CCAR1    | 0,762069805  | 5,971328771 | 0,114840614 | 0,464497311 |
| LOXL1    | 1,482870681  | 5,091783994 | 0,114978966 | 0,464497311 |
| SIL1     | -0,685226021 | 4,978501241 | 0,11498081  | 0,464497311 |
| CKAP4    | 1,065422203  | 7,167969861 | 0,115047223 | 0,464497311 |
| PTPN18   | -0,769357981 | 5,297998224 | 0,115064683 | 0,464497311 |
| RPS3     | 0,965946793  | 11,11797898 | 0,115119586 | 0,464497311 |
| KLF16    | 0,8853701    | 5,846994628 | 0,115229308 | 0,464665081 |
| MBIP     | -0,75224541  | 5,327650321 | 0,115379516 | 0,464995817 |
| PLEKHA8  | 1,133058939  | 5,786039139 | 0,115489148 | 0,465162728 |

|          |              |             |             |             |
|----------|--------------|-------------|-------------|-------------|
| DCUN1D2  | 1,624909974  | 5,321837616 | 0,115725662 | 0,465840196 |
| ESYT1    | -0,626098206 | 7,220533027 | 0,115797258 | 0,465853396 |
| CBX4     | 1,123793537  | 6,649826004 | 0,115899765 | 0,465990858 |
| CENPV    | 1,606402491  | 5,57276731  | 0,116135146 | 0,466035103 |
| POFUT2   | 1,048936893  | 5,11173492  | 0,116149225 | 0,466035103 |
| TOMM20   | 0,739101277  | 7,864960229 | 0,116153922 | 0,466035103 |
| UBE2G1   | 0,762121003  | 6,364060943 | 0,116208441 | 0,466035103 |
| F3       | 1,344421705  | 7,043969188 | 0,116252487 | 0,466035103 |
| SLC25A13 | 1,084721523  | 4,83842167  | 0,116755236 | 0,467775533 |
| RNF26    | 0,882128133  | 6,232800839 | 0,116881822 | 0,468007717 |
| UPF3A    | 0,848661757  | 5,673988436 | 0,11698382  | 0,468141238 |
| MCTS1    | 0,929409925  | 5,725431546 | 0,117483569 | 0,469865372 |
| GPATCH8  | -0,633899156 | 5,143818437 | 0,117608737 | 0,470090257 |
| WDR59    | -0,679402579 | 5,338028592 | 0,118004427 | 0,471296046 |
| BAP1     | 0,793885092  | 6,488803082 | 0,118060816 | 0,471296046 |
| PRPF40A  | 0,81680776   | 6,746358299 | 0,118178162 | 0,471296046 |
| ANP32E   | 1,210796444  | 7,289815875 | 0,11821776  | 0,471296046 |
| PSMD4    | 0,732774703  | 6,201098835 | 0,118255981 | 0,471296046 |
| FAM134C  | -0,555421367 | 7,01173883  | 0,118525476 | 0,471758421 |
| GBE1     | 0,909523794  | 5,306697712 | 0,118551997 | 0,471758421 |
| SLCO3A1  | -0,767688047 | 6,014310178 | 0,118579547 | 0,471758421 |
| ADIPOR2  | 0,976000835  | 5,4477101   | 0,118808755 | 0,472166409 |
| UBE2Z    | 0,736062598  | 8,012460181 | 0,118820583 | 0,472166409 |
| MRPL9    | 0,690673801  | 6,678825965 | 0,118925573 | 0,472186537 |
| LIN7C    | 0,841114363  | 7,467456766 | 0,11896414  | 0,472186537 |
| AVL9     | 0,744013598  | 6,64167329  | 0,119097358 | 0,472440306 |
| DHFR     | 0,867650645  | 5,856394084 | 0,119269692 | 0,47252141  |
| AKTIP    | -0,688377826 | 4,958014521 | 0,119311141 | 0,47252141  |
| P4HA1    | 1,111729219  | 6,010037692 | 0,119325688 | 0,47252141  |
| PLEKHM1P | -0,643325991 | 6,035631828 | 0,119484589 | 0,47277655  |
| TMEM14B  | 0,901658704  | 5,76080471  | 0,119528783 | 0,47277655  |
| LRWD1    | 0,955903741  | 4,581225712 | 0,119729344 | 0,473158223 |
| PRKAB2   | 0,939891688  | 3,966567472 | 0,119764055 | 0,473158223 |
| PRR14    | -0,622829259 | 5,947573105 | 0,119847461 | 0,47321357  |
| ISY1     | 0,943509388  | 5,683915558 | 0,120131851 | 0,474061974 |
| INO80E   | -0,563719174 | 5,833519117 | 0,120312256 | 0,47449929  |
| ARSB     | -0,624361039 | 5,255928448 | 0,120451993 | 0,474775804 |
| SLC25A25 | -0,941282427 | 4,682506772 | 0,12058245  | 0,474949697 |
| MAP3K6   | -0,816402408 | 6,274818644 | 0,120675728 | 0,474949697 |
| TBC1D12  | -0,659948278 | 4,674665457 | 0,120705063 | 0,474949697 |
| PXN      | 1,057132892  | 7,659015192 | 0,120909297 | 0,475478949 |
| ZMYM5    | -0,743000003 | 3,604256027 | 0,121008871 | 0,475596249 |
| KCNAB2   | -0,737919275 | 5,21373808  | 0,121094162 | 0,475657311 |
| MEAF6    | -0,571636549 | 6,661643597 | 0,121291766 | 0,475696816 |
| ZNF16    | 1,057727715  | 4,075249083 | 0,121299812 | 0,475696816 |
| IQCB1    | 0,998481872  | 6,066535682 | 0,121313501 | 0,475696816 |
| EIF2C2   | 1,180469481  | 7,660301412 | 0,121394378 | 0,475700589 |
| TBRG4    | 0,916310223  | 5,325846733 | 0,121453985 | 0,475700589 |
| FXVD6    | -1,098620762 | 8,264085126 | 0,121762617 | 0,476223704 |
| TUBGCP6  | -0,789923228 | 6,104029912 | 0,121941041 | 0,476223704 |

|           |              |             |             |             |
|-----------|--------------|-------------|-------------|-------------|
| C16orf62  | -0,642325884 | 4,727264977 | 0,121947264 | 0,476223704 |
| SV2A      | 1,140273794  | 3,670301418 | 0,121954923 | 0,476223704 |
| TPP1      | -0,663307017 | 7,573250429 | 0,122011785 | 0,476223704 |
| TDP2      | 0,788620198  | 6,898309309 | 0,122138983 | 0,476223704 |
| TGM2      | -0,913565913 | 8,955616527 | 0,12218047  | 0,476223704 |
| TPRG1L    | -0,730979418 | 5,631375165 | 0,122196397 | 0,476223704 |
| GCC2      | -0,675732032 | 6,053346749 | 0,122216085 | 0,476223704 |
| DLG5      | 0,939597813  | 6,258073927 | 0,122384418 | 0,476607279 |
| SLC7A5P2  | 1,036970529  | 6,408083246 | 0,122506168 | 0,47680911  |
| ZNF543    | -0,665541406 | 4,424651214 | 0,122632683 | 0,476829129 |
| FAM20B    | 0,84513615   | 6,123639501 | 0,122703513 | 0,476829129 |
| CHD9      | -0,657247891 | 6,140587702 | 0,122721091 | 0,476829129 |
| LCMT1     | -0,586817614 | 4,166147971 | 0,122993645 | 0,477615982 |
| EZH1      | -0,850210668 | 5,970255027 | 0,123100298 | 0,477698768 |
| CALCOCO1  | -0,812295269 | 6,202971057 | 0,123155072 | 0,477698768 |
| STK38L    | 0,890783289  | 4,4256892   | 0,12335742  | 0,477796557 |
| ENTPD5    | 0,79345149   | 5,019154605 | 0,123374465 | 0,477796557 |
| HNRNPF    | 0,729157698  | 6,938284292 | 0,123390488 | 0,477796557 |
| EED       | 0,929123494  | 5,668949612 | 0,123698096 | 0,478715843 |
| NDUFA8    | 0,785394317  | 5,739389757 | 0,12380053  | 0,47880492  |
| RRP15     | 1,144756149  | 4,144919195 | 0,123861545 | 0,47880492  |
| DHRXS     | 0,849369791  | 6,060882144 | 0,124097564 | 0,479287039 |
| SEPT6     | -0,690277153 | 4,717650425 | 0,124126838 | 0,479287039 |
| ATP5G1    | 0,801619016  | 6,582123658 | 0,124343762 | 0,479400083 |
| ATXN10    | -0,710561754 | 5,742090841 | 0,124386962 | 0,479400083 |
| SCYL1     | 0,801123668  | 5,170269417 | 0,124439917 | 0,479400083 |
| UTP23     | 0,803304597  | 4,682865338 | 0,124463628 | 0,479400083 |
| NME4      | 1,214927408  | 6,326353775 | 0,124571811 | 0,479400083 |
| ACO2      | -0,638135588 | 5,850518526 | 0,124577936 | 0,479400083 |
| EIF6      | 0,781641962  | 7,214603594 | 0,124772257 | 0,479877055 |
| BIRC3     | 1,384013093  | 6,193311954 | 0,125188126 | 0,481205092 |
| COX5A     | 0,753058482  | 7,150257076 | 0,125480165 | 0,482055911 |
| KIAA0391  | 0,74050554   | 5,585193182 | 0,125637397 | 0,482264526 |
| UACA      | -0,692308306 | 6,81704815  | 0,125675915 | 0,482264526 |
| MFSD3     | 0,921430644  | 4,342336658 | 0,1260041   | 0,482443044 |
| NCAPD3    | 0,784975559  | 5,03283583  | 0,126058856 | 0,482443044 |
| LPGAT1    | 0,795937692  | 6,035465198 | 0,126115954 | 0,482443044 |
| SLC25A6   | -0,968909049 | 8,143999376 | 0,126223431 | 0,482443044 |
| PLEKHO2   | -0,646167348 | 6,127451944 | 0,126285067 | 0,482443044 |
| MAD2L2    | 0,74325634   | 5,586052444 | 0,1263399   | 0,482443044 |
| PARVA     | -0,632538623 | 5,601270338 | 0,126429113 | 0,482443044 |
| ARID1B    | -0,528781801 | 6,374351028 | 0,126451395 | 0,482443044 |
| DUS1L     | 1,000528348  | 4,357986422 | 0,12646118  | 0,482443044 |
| NFE2L1    | 0,79120086   | 7,497962955 | 0,12646894  | 0,482443044 |
| RNF215    | 1,171805761  | 4,391120186 | 0,126500684 | 0,482443044 |
| C10orf35  | 1,517453063  | 4,336539176 | 0,126699378 | 0,482816292 |
| LIMK1     | 0,760866827  | 6,378335014 | 0,126785473 | 0,482816292 |
| LOC642852 | 0,772285135  | 4,670151414 | 0,12687274  | 0,482816292 |
| GPN1      | 0,820813957  | 5,571670628 | 0,126932021 | 0,482816292 |
| ZNF740    | -0,646614252 | 3,861308371 | 0,126973373 | 0,482816292 |

|          |              |             |             |             |
|----------|--------------|-------------|-------------|-------------|
| KCTD20   | 1,004932419  | 6,010297532 | 0,127063748 | 0,482816292 |
| S100PBP  | 0,798683139  | 5,331374518 | 0,127094184 | 0,482816292 |
| SHISA4   | -0,753609845 | 4,760177968 | 0,127216797 | 0,483012995 |
| RSU1     | -0,643169561 | 7,225240186 | 0,127559074 | 0,484043031 |
| ZNF638   | -0,709753514 | 6,002207849 | 0,127764103 | 0,484551402 |
| SAAL1    | 1,246271136  | 6,40529003  | 0,127945783 | 0,484970702 |
| AKR7A2   | -0,667803995 | 4,913540625 | 0,128018604 | 0,484977145 |
| DOT1L    | -0,698641833 | 5,185394854 | 0,128235563 | 0,485281038 |
| FUBP3    | 0,753913435  | 6,401545021 | 0,128250823 | 0,485281038 |
| AP3D1    | 0,874513057  | 5,843748402 | 0,12831232  | 0,485281038 |
| IKBKB    | -0,729956121 | 6,41955151  | 0,128513629 | 0,485772969 |
| TFRC     | -0,839496001 | 7,960599267 | 0,128680021 | 0,486025988 |
| SMG5     | 0,82197272   | 7,820647001 | 0,128723117 | 0,486025988 |
| FANCM    | 1,15925164   | 3,320369168 | 0,128838427 | 0,486172104 |
| TOB2     | -0,740752684 | 3,266802698 | 0,128904409 | 0,486172104 |
| USP7     | 0,669487631  | 7,397925289 | 0,129163337 | 0,486643922 |
| CLIP1    | 0,958131141  | 5,974038148 | 0,12919525  | 0,486643922 |
| SLC25A19 | 0,760438632  | 3,965931626 | 0,129243605 | 0,486643922 |
| MANBA    | -0,621708647 | 5,847434295 | 0,129467855 | 0,487219261 |
| CAMK1D   | 0,799943737  | 4,762589731 | 0,129648547 | 0,487603784 |
| MTF2     | 0,889042886  | 5,388822615 | 0,129713046 | 0,487603784 |
| RAD51C   | 0,708075143  | 4,146714799 | 0,129999415 | 0,487965998 |
| IL1R1    | -0,836981743 | 6,713363968 | 0,130019932 | 0,487965998 |
| KLF6     | -0,696997614 | 7,571733646 | 0,130024082 | 0,487965998 |
| POLH     | 1,052836677  | 4,77580333  | 0,130514225 | 0,488958552 |
| MPST     | -0,645604367 | 6,409076018 | 0,130676037 | 0,488958552 |
| DONSON   | 1,119245077  | 4,998367154 | 0,130808091 | 0,488958552 |
| DEXI     | -0,7424357   | 3,6954144   | 0,130881342 | 0,488958552 |
| TMEM56   | -0,714057306 | 3,598787403 | 0,130894734 | 0,488958552 |
| USP30    | -0,698678213 | 3,269310053 | 0,130968211 | 0,488958552 |
| NCF4     | -0,752620056 | 4,801342048 | 0,131025926 | 0,488958552 |
| DECR1    | -0,743426658 | 4,59270726  | 0,131031567 | 0,488958552 |
| AFTPH    | -0,577108591 | 6,81542873  | 0,131085931 | 0,488958552 |
| ZNF672   | -0,660935619 | 5,529986527 | 0,131199482 | 0,488958552 |
| CRYAB    | -0,99554319  | 5,751710031 | 0,131221774 | 0,488958552 |
| VAT1     | -0,604994329 | 8,496699867 | 0,131282914 | 0,488958552 |
| IFI16    | 0,864665651  | 8,618176664 | 0,131328918 | 0,488958552 |
| RSBN1    | -0,701150335 | 3,383718591 | 0,131344938 | 0,488958552 |
| MED12    | -0,571966232 | 5,768717274 | 0,131364139 | 0,488958552 |
| ATP5B    | 0,73450349   | 8,963237706 | 0,131626079 | 0,489226598 |
| SNAP29   | 0,742468952  | 5,750397341 | 0,13163536  | 0,489226598 |
| SMAD7    | -0,592985138 | 7,424212677 | 0,131765966 | 0,489226598 |
| RIPK2    | 1,111696208  | 6,043499081 | 0,131784957 | 0,489226598 |
| TUBA1B   | 0,978915297  | 10,73503202 | 0,131794876 | 0,489226598 |
| SOD2     | -0,749365201 | 8,777141607 | 0,131993439 | 0,489697096 |
| TNFRSF21 | 0,795570344  | 6,555446238 | 0,132223414 | 0,490283555 |
| NEXN     | -0,843755621 | 4,800423981 | 0,132371481 | 0,490565832 |
| ARNT     | -0,581711933 | 7,179056176 | 0,132650736 | 0,491000904 |
| GALNT7   | 0,970304358  | 5,955181544 | 0,132668665 | 0,491000904 |
| SLFN13   | 1,134933152  | 3,794550769 | 0,132709746 | 0,491000904 |

|         |              |             |             |             |
|---------|--------------|-------------|-------------|-------------|
| RNF125  | -0,708863431 | 3,856936556 | 0,132856161 | 0,491000904 |
| HUWE1   | 1,128210164  | 7,070705283 | 0,132905098 | 0,491000904 |
| RYK     | 1,110837686  | 7,852625375 | 0,13294573  | 0,491000904 |
| NPC1    | -0,59606942  | 6,579783838 | 0,132992913 | 0,491000904 |
| DGCR14  | 1,056974124  | 5,311187791 | 0,13309832  | 0,491124159 |
| MTERFD2 | -0,693522366 | 4,996130487 | 0,133289648 | 0,491564149 |
| HSPA7   | 1,194772071  | 7,114502476 | 0,133409068 | 0,491738615 |
| NMRAL1  | 0,754072878  | 5,660126744 | 0,133740685 | 0,492694615 |
| FOSL2   | -0,820244299 | 7,807836688 | 0,134034574 | 0,493476164 |
| WARS2   | 0,79040332   | 4,019312945 | 0,134134117 | 0,493476164 |
| SLC5A3  | 1,019339763  | 5,588169637 | 0,134169938 | 0,493476164 |
| POMGNT1 | 0,787045978  | 6,520599069 | 0,134269058 | 0,493549734 |
| FLNB    | 0,846755328  | 7,90699635  | 0,134385395 | 0,493549734 |
| PHF20L1 | 0,721940432  | 6,454894263 | 0,134407077 | 0,493549734 |
| FAM136A | 0,750934896  | 6,241415528 | 0,134534491 | 0,49365039  |
| EEF1B2  | 0,834703388  | 9,268348395 | 0,134695961 | 0,49365039  |
| COG1    | -0,675520868 | 5,693836332 | 0,134698379 | 0,49365039  |
| ANO10   | -0,596423485 | 4,727207113 | 0,134724062 | 0,49365039  |
| EIF4G2  | 0,784189677  | 10,71893075 | 0,134920373 | 0,494104202 |
| IGSF8   | -0,796429499 | 5,699372168 | 0,13523053  | 0,494717777 |
| ZNF680  | 1,073530149  | 4,979512702 | 0,135233016 | 0,494717777 |
| CAPN2   | -0,685246975 | 7,358660247 | 0,135426658 | 0,495053128 |
| WRNIP1  | 0,834510515  | 7,200035228 | 0,135603327 | 0,495053128 |
| KCTD6   | 0,809130247  | 5,226129495 | 0,13564252  | 0,495053128 |
| TESK1   | 0,82452097   | 5,382562962 | 0,135667838 | 0,495053128 |
| HCCS    | 0,717169313  | 4,62080503  | 0,135723411 | 0,495053128 |
| FASN    | -0,806212796 | 6,697056126 | 0,13578901  | 0,495053128 |
| EHD4    | -0,865892097 | 5,941434003 | 0,135920881 | 0,495053128 |
| HSPB11  | 1,096001338  | 5,880866308 | 0,135954393 | 0,495053128 |
| PCM1    | -0,652224529 | 6,040692046 | 0,135978077 | 0,495053128 |
| TEP1    | -0,73407517  | 5,578337457 | 0,136256704 | 0,495802808 |
| RAC1    | 0,760875719  | 8,354342542 | 0,136440138 | 0,495999459 |
| METTL2B | 0,838961064  | 5,399754227 | 0,136456223 | 0,495999459 |
| PCGF6   | 0,904533703  | 4,501015611 | 0,136664612 | 0,496236017 |
| SRP54   | -0,689605983 | 6,207365329 | 0,136670898 | 0,496236017 |
| CCDC111 | -0,659077467 | 5,371844303 | 0,136739621 | 0,496236017 |
| NME7    | 1,115545965  | 5,129341523 | 0,136945007 | 0,496391548 |
| KRR1    | 0,675841768  | 6,525609891 | 0,136976889 | 0,496391548 |
| RLF     | 0,802742472  | 5,063245311 | 0,137045871 | 0,496391548 |
| THOP1   | 0,898113499  | 5,607387311 | 0,13707366  | 0,496391548 |
| NSUN5   | 0,780717106  | 4,826090703 | 0,137314234 | 0,496623531 |
| TOM1    | -0,631399581 | 6,322226364 | 0,137318006 | 0,496623531 |
| GNPTG   | -0,678380061 | 6,043860376 | 0,137356207 | 0,496623531 |
| RPF1    | 0,759080655  | 6,279372382 | 0,137749944 | 0,497773816 |
| TRPS1   | 1,414467022  | 6,529559244 | 0,137825552 | 0,497773816 |
| AGAP1   | -0,838818794 | 5,141350656 | 0,137924625 | 0,497773816 |
| SNAP23  | -0,587049557 | 6,585113538 | 0,138016487 | 0,497773816 |
| PHAX    | 0,759973891  | 5,417465661 | 0,138039344 | 0,497773816 |
| DMTF1   | -0,791474415 | 5,468997831 | 0,138359266 | 0,498288234 |
| NSUN4   | 1,131339757  | 5,770881392 | 0,138388143 | 0,498288234 |

|          |              |             |             |             |
|----------|--------------|-------------|-------------|-------------|
| FXVD5    | 1,222490691  | 9,807296877 | 0,138569891 | 0,498288234 |
| SSBP1    | 1,026478687  | 7,000286975 | 0,138580771 | 0,498288234 |
| ITCH     | 0,758192389  | 6,536458949 | 0,138597558 | 0,498288234 |
| UBE2Q2   | -0,704727115 | 5,539073814 | 0,13862044  | 0,498288234 |
| CPNE1    | 1,356999414  | 5,177760671 | 0,13873594  | 0,498382555 |
| ARHGAP10 | -0,81355564  | 4,232346545 | 0,138792854 | 0,498382555 |
| MCM5     | 0,963568616  | 5,867162663 | 0,138969703 | 0,498635298 |
| ARPC1B   | -0,618710022 | 6,630069844 | 0,139069803 | 0,498635298 |
| ERCC8    | 0,892366815  | 3,835628266 | 0,139155462 | 0,498635298 |
| AMIGO2   | 1,341248877  | 4,786382045 | 0,139155737 | 0,498635298 |
| TGFBR3   | -0,978142382 | 4,918832073 | 0,139617097 | 0,500025728 |
| C6orf47  | 0,720957454  | 5,675761614 | 0,139771798 | 0,500317002 |
| SENP2    | 0,9661838    | 6,135090323 | 0,13990527  | 0,500532024 |
| SSSCA1   | 0,955162898  | 5,638355988 | 0,140131422 | 0,500855371 |
| PEX10    | 0,925795759  | 5,56342318  | 0,14014255  | 0,500855371 |
| ZDHHC2   | -0,75984482  | 4,373943624 | 0,140655387 | 0,502360858 |
| EXOSC7   | 0,779038741  | 5,709489788 | 0,140711136 | 0,502360858 |
| SNRNP    | 0,831914645  | 8,275052766 | 0,14098722  | 0,502917423 |
| PKD2     | -0,756960087 | 4,464084893 | 0,141048243 | 0,502917423 |
| FOXO3    | -0,784018069 | 6,31480211  | 0,141194859 | 0,502917423 |
| COPG2    | 0,908979486  | 3,744296431 | 0,141233605 | 0,502917423 |
| ARL6IP6  | 0,835370836  | 6,00404715  | 0,141284989 | 0,502917423 |
| C22orf28 | 0,699348384  | 6,487998393 | 0,141358811 | 0,502917423 |
| ALAS1    | -0,54604651  | 5,942821929 | 0,141383297 | 0,502917423 |
| GPSM1    | -0,918053863 | 4,454172372 | 0,141711144 | 0,503820799 |
| ARHGEF11 | -0,762851324 | 4,465431911 | 0,141911458 | 0,504270055 |
| TOMM70A  | 0,854736185  | 6,72156503  | 0,142078402 | 0,504579812 |
| NUPL2    | 0,761492898  | 6,89725426  | 0,14217275  | 0,504579812 |
| ASPH     | 1,185343951  | 6,718614249 | 0,142220619 | 0,504579812 |
| ERCC3    | -0,649065484 | 5,249446263 | 0,14255766  | 0,505259607 |
| ZNF841   | 0,779502202  | 6,175318907 | 0,142560417 | 0,505259607 |
| ELF1     | -0,680261451 | 6,704692947 | 0,1429486   | 0,506238245 |
| GRSF1    | 0,73836919   | 5,359100918 | 0,142985021 | 0,506238245 |
| FAM35A   | 0,755277545  | 5,384543152 | 0,143179052 | 0,506662144 |
| GALNT2   | 0,735584929  | 7,171527973 | 0,143256022 | 0,506671585 |
| GPR125   | 1,160965946  | 5,233723083 | 0,143938794 | 0,508572093 |
| CWF19L2  | -0,628361164 | 5,463756534 | 0,144004691 | 0,508572093 |
| INO80C   | -0,707686938 | 4,331273384 | 0,144071503 | 0,508572093 |
| CLCN2    | 1,531790865  | 5,356510049 | 0,144280469 | 0,508572093 |
| RANBP9   | 0,752055717  | 6,434311106 | 0,144322358 | 0,508572093 |
| ZNF25    | -0,667988872 | 4,373997712 | 0,144392544 | 0,508572093 |
| PLEC     | 0,917729719  | 6,075011019 | 0,144416382 | 0,508572093 |
| UQCRC1   | 0,702116443  | 6,0891283   | 0,144435582 | 0,508572093 |
| C1orf112 | 0,886870551  | 4,972712351 | 0,144464605 | 0,508572093 |
| CIRH1A   | 0,759086018  | 6,31153985  | 0,144555326 | 0,508628878 |
| RPL10    | -0,61740271  | 10,56702719 | 0,144694023 | 0,508854329 |
| SLC4A1AP | 0,731983335  | 4,877430534 | 0,144788765 | 0,508925044 |
| PYGB     | 0,880185837  | 7,82648319  | 0,144950085 | 0,509229588 |
| VIM      | -0,725089095 | 11,68648292 | 0,145104417 | 0,509509279 |
| DNAJA2   | 0,730844515  | 7,21319431  | 0,145292157 | 0,50990593  |



|           |              |             |             |             |
|-----------|--------------|-------------|-------------|-------------|
| TSPAN15   | -0,743165305 | 5,809600322 | 0,14539085  | 0,509921119 |
| NUP37     | 0,935841916  | 4,476922749 | 0,145465209 | 0,509921119 |
| EIF2B5    | 1,015150153  | 6,40378606  | 0,145588498 | 0,509921119 |
| BCAT2     | -0,75828955  | 5,70723072  | 0,145613922 | 0,509921119 |
| CEP97     | 0,90430391   | 5,226651308 | 0,145696445 | 0,509921119 |
| POLR2C    | -0,641692873 | 5,128487703 | 0,145745162 | 0,509921119 |
| FAM49B    | 0,808868487  | 5,785943223 | 0,145828855 | 0,509952288 |
| CELF1     | 0,745063653  | 4,893846689 | 0,14629723  | 0,510927259 |
| SMARCE1   | 0,610393987  | 6,835798696 | 0,146354154 | 0,510927259 |
| TOM1L2    | -0,823846056 | 5,996916423 | 0,146376342 | 0,510927259 |
| CPNE3     | -0,621094109 | 7,187525009 | 0,146407371 | 0,510927259 |
| RCN2      | 0,723415807  | 5,862791893 | 0,146741657 | 0,511831896 |
| CCDC43    | 0,738185081  | 5,363755321 | 0,146856429 | 0,511970341 |
| GMPR2     | -0,692886219 | 4,575210314 | 0,146961734 | 0,512075659 |
| NUP88     | 0,808800917  | 5,308529292 | 0,147104915 | 0,512312778 |
| NPEPPS    | 0,640999447  | 7,70917787  | 0,147267643 | 0,512617692 |
| FAM48A    | 0,996308901  | 3,193813394 | 0,147665243 | 0,513259248 |
| PDXP      | 0,917860885  | 5,326654905 | 0,147708648 | 0,513259248 |
| FAM76B    | 0,846985404  | 3,88661627  | 0,147740107 | 0,513259248 |
| LGALS8    | -0,626389822 | 6,360751352 | 0,147803319 | 0,513259248 |
| SLC25A46  | 0,808545119  | 5,93375441  | 0,147828298 | 0,513259248 |
| COG5      | -0,591002529 | 5,920101272 | 0,148017535 | 0,513294569 |
| LAPTM4B   | 0,982617633  | 8,3646744   | 0,148158782 | 0,513294569 |
| PITPNB    | 0,641915927  | 7,143064639 | 0,148531101 | 0,513294569 |
| CYB5R1    | -0,614603429 | 5,894371955 | 0,148574727 | 0,513294569 |
| GTF2H1    | 0,901301102  | 6,76733225  | 0,148617214 | 0,513294569 |
| WDR48     | 0,931524088  | 6,202624341 | 0,148619629 | 0,513294569 |
| CDC42     | -0,63386549  | 8,378637916 | 0,148642433 | 0,513294569 |
| GPNMB     | -0,862380356 | 9,063352431 | 0,14864269  | 0,513294569 |
| ANKRD16   | 1,082399008  | 4,342781063 | 0,148760239 | 0,513294569 |
| ELOVL5    | 0,751532992  | 8,352024097 | 0,148787276 | 0,513294569 |
| HSPA1A    | 1,544395353  | 11,55917213 | 0,148790462 | 0,513294569 |
| SLC25A40  | 0,810384711  | 5,320350814 | 0,148798896 | 0,513294569 |
| PROSC     | -0,587885459 | 4,854243372 | 0,148817035 | 0,513294569 |
| AP4E1     | 0,830265533  | 3,553054381 | 0,149004268 | 0,513680539 |
| FAM102B   | 0,644407725  | 5,700481376 | 0,149255929 | 0,514138218 |
| ATP6V1D   | 0,718913123  | 6,630771447 | 0,149320529 | 0,514138218 |
| PLSCR1    | 0,811297775  | 7,448117646 | 0,149547389 | 0,514138218 |
| FBXL6     | 0,916908217  | 3,995320153 | 0,149592592 | 0,514138218 |
| FDX1L     | 0,773305941  | 5,487431185 | 0,149613925 | 0,514138218 |
| ATP2B1    | 0,818137559  | 5,737297555 | 0,149621538 | 0,514138218 |
| TSG101    | -0,578483574 | 5,525980327 | 0,149706343 | 0,514138218 |
| GSN       | -0,700819003 | 8,605876933 | 0,149885679 | 0,514138218 |
| NARF      | 0,789780754  | 5,191977924 | 0,149889406 | 0,514138218 |
| C14orf169 | 0,882982829  | 4,18430117  | 0,149891007 | 0,514138218 |
| FAP       | 1,213039669  | 5,483422455 | 0,150006322 | 0,514275067 |
| CMPK1     | 0,747273688  | 7,628606595 | 0,150152857 | 0,514313277 |
| PHGDH     | 1,486497863  | 5,463762421 | 0,150226354 | 0,514313277 |
| DDX27     | 0,784268899  | 6,107254506 | 0,150289102 | 0,514313277 |
| XRCC4     | 0,798181165  | 4,432619763 | 0,150346679 | 0,514313277 |

|            |              |             |             |             |
|------------|--------------|-------------|-------------|-------------|
| MYL9       | -0,975577242 | 8,049739531 | 0,150394585 | 0,514313277 |
| RDBP       | 0,759129341  | 5,834270904 | 0,150839423 | 0,515467018 |
| ATRIP      | 0,78906846   | 3,414865827 | 0,150895202 | 0,515467018 |
| PGM2       | -0,623704877 | 3,484142108 | 0,150958738 | 0,515467018 |
| CAB39      | 0,868688281  | 7,613190042 | 0,151107465 | 0,515716618 |
| FCER1G     | -0,807324946 | 8,860820423 | 0,151530871 | 0,516902956 |
| FKBP10     | 1,197315136  | 7,392204891 | 0,151764072 | 0,517439603 |
| ING2       | 1,245443283  | 5,425957048 | 0,1518416   | 0,517445212 |
| PCCA       | -0,623130014 | 5,623033276 | 0,151940202 | 0,517522596 |
| DUSP16     | -0,648682298 | 6,035669503 | 0,152077118 | 0,517627494 |
| INTS3      | -0,834071401 | 4,805071755 | 0,152183868 | 0,517627494 |
| DPP3       | -0,660536876 | 4,576180389 | 0,152198728 | 0,517627494 |
| UBA7       | -0,690917826 | 7,196097045 | 0,152344026 | 0,517644678 |
| ARHGAP27   | -0,604620506 | 5,225214884 | 0,152358933 | 0,517644678 |
| PHF3       | 0,868772592  | 7,423434249 | 0,152431517 | 0,517644678 |
| NOTCH2     | -0,568359249 | 6,349697894 | 0,152530211 | 0,517722005 |
| HPRT1      | 1,196568398  | 6,186995147 | 0,152733422 | 0,51777673  |
| ITSN2      | -0,733769747 | 5,342737415 | 0,152777108 | 0,51777673  |
| AGPAT6     | 1,122121927  | 6,688774492 | 0,152799982 | 0,51777673  |
| NARS       | 0,691426428  | 7,208675931 | 0,152920769 | 0,51777673  |
| MCM3       | 0,765649749  | 7,129776875 | 0,152934384 | 0,51777673  |
| ALAD       | -0,631539263 | 5,222446661 | 0,153001923 | 0,51777673  |
| VRK1       | 1,113496208  | 5,541419453 | 0,153221634 | 0,518067258 |
| WBP11      | 0,649448072  | 7,289820917 | 0,153299392 | 0,518067258 |
| SERP1      | -0,548916494 | 7,507998908 | 0,153436113 | 0,518067258 |
| UBP1       | 0,724683203  | 6,701746674 | 0,153457655 | 0,518067258 |
| WFDC2      | -1,125803332 | 8,499515568 | 0,153467644 | 0,518067258 |
| PNPT1      | 0,719456358  | 5,623657729 | 0,153599279 | 0,518255063 |
| ADAMTS1    | -0,985998372 | 6,440776178 | 0,153804916 | 0,518692246 |
| SEPW1      | -0,841451711 | 4,21174528  | 0,153894928 | 0,518739256 |
| CAD        | 0,741807639  | 5,789378779 | 0,154293204 | 0,519665187 |
| RCN1       | 0,686519078  | 8,623326421 | 0,154322042 | 0,519665187 |
| HSF4       | 0,812635692  | 5,28140044  | 0,154543116 | 0,52015277  |
| PGAM1      | 0,606282558  | 7,468192088 | 0,154864011 | 0,520975673 |
| MSTO1      | 0,818159568  | 4,922576402 | 0,155126566 | 0,521601604 |
| RBM33      | 0,716702593  | 6,398491588 | 0,155276301 | 0,521847755 |
| SMO        | 1,46296322   | 5,202130358 | 0,155824365 | 0,523431698 |
| PHKG2      | 1,16788688   | 5,863741067 | 0,156048565 | 0,523926717 |
| ELP2       | -0,646384416 | 4,62851998  | 0,156312607 | 0,524554956 |
| UBN2       | -0,588571024 | 4,705945907 | 0,156421712 | 0,524631895 |
| ADM        | -0,909182615 | 6,337659972 | 0,156583686 | 0,524631895 |
| TASP1      | 0,866500173  | 4,484661209 | 0,15664848  | 0,524631895 |
| C12orf52   | 0,734813748  | 4,635207392 | 0,156676153 | 0,524631895 |
| TMEM159    | -0,704267788 | 4,832470663 | 0,156720219 | 0,524631895 |
| C4orf52    | 0,780068066  | 5,622960628 | 0,156889542 | 0,524941015 |
| DENND4A    | -0,587144643 | 5,190825278 | 0,157442859 | 0,525726682 |
| LSM14A     | 0,68229008   | 7,596861232 | 0,157487294 | 0,525726682 |
| COL4A2     | -0,853648175 | 7,867129481 | 0,157584278 | 0,525726682 |
| C16orf5    | -0,527303961 | 5,223185183 | 0,15760358  | 0,525726682 |
| GADD45GIP1 | 0,707663489  | 7,481702572 | 0,157709115 | 0,525726682 |

|          |              |              |             |             |
|----------|--------------|--------------|-------------|-------------|
| CORO7    | -0,625586143 | 3,849225926  | 0,157721673 | 0,525726682 |
| NDUFB11  | 0,697815574  | 7,879025799  | 0,1577883   | 0,525726682 |
| UBE2L6   | -0,716576712 | 5,843135732  | 0,157990209 | 0,525726682 |
| DENR     | 0,887856159  | 7,38317734   | 0,158027858 | 0,525726682 |
| DTX3L    | 0,838516486  | 6,856635994  | 0,158069695 | 0,525726682 |
| MTIF2    | 0,747388504  | 5,820255852  | 0,158075706 | 0,525726682 |
| RSL24D1  | -0,7185828   | 6,80016275   | 0,158268857 | 0,525726682 |
| CXCL9    | 1,579173595  | 7,202191109  | 0,158385201 | 0,525726682 |
| C14orf2  | 0,660016245  | 8,371765847  | 0,158414757 | 0,525726682 |
| MRS2     | 0,80063213   | 6,180204466  | 0,158455737 | 0,525726682 |
| RAD52    | 0,888865475  | 3,89165331   | 0,158472651 | 0,525726682 |
| TFCP2    | -0,678292196 | 4,634452321  | 0,158505302 | 0,525726682 |
| NUS1     | 0,890020685  | 6,966645399  | 0,158615663 | 0,525726682 |
| RNF219   | 0,915212527  | 4,399327516  | 0,158692401 | 0,525726682 |
| STXBP3   | -0,602167772 | 5,387369833  | 0,15873099  | 0,525726682 |
| AMPD2    | 0,890486164  | 6,678722169  | 0,158743399 | 0,525726682 |
| ALG1     | -0,632385898 | 4,618801685  | 0,158859494 | 0,525855772 |
| RAP2B    | 0,852165435  | 6,023527599  | 0,159251129 | 0,526896385 |
| NDUFB8   | -0,548771405 | 8,095432981  | 0,159462968 | 0,527341407 |
| IGBP1    | 0,966128483  | 5,805344517  | 0,159574498 | 0,527421319 |
| ATP11B   | 0,73734492   | 6,99472332   | 0,159652527 | 0,527421319 |
| METTL9   | 0,690806761  | 6,600244784  | 0,15971917  | 0,527421319 |
| TMEM14C  | 0,778494841  | 7,424958493  | 0,159947621 | 0,527804394 |
| MAPK7    | 0,915033436  | 5,575284008  | 0,16003711  | 0,527804394 |
| RGS19    | -0,607360913 | 4,173201572  | 0,160067383 | 0,527804394 |
| FNDC3B   | 0,607921118  | 8,57105353   | 0,160299765 | 0,528315175 |
| CD320    | 0,918615514  | 5,38697372   | 0,160645216 | 0,529191547 |
| TSC1     | -0,573800328 | 5,204365001  | 0,160787108 | 0,529191547 |
| ZNF160   | -0,546727797 | 5,019933465  | 0,160832625 | 0,529191547 |
| EBNA1BP2 | 0,629558639  | 6,589389227  | 0,160876093 | 0,529191547 |
| ZNF3     | 0,892620703  | 5,369018916  | 0,161094679 | 0,52965507  |
| IRF5     | -0,619131995 | 5,253799292  | 0,161311221 | 0,530111429 |
| C4A      | -1,014660397 | 4,709214525  | 0,16168623  | 0,531087863 |
| TUBA4A   | 0,869211539  | 5,967402284  | 0,162085001 | 0,53214137  |
| SEC24B   | 0,70446147   | 6,374198044  | 0,162336023 | 0,532709019 |
| RPP40    | 1,17182727   | 5,470818971  | 0,162497246 | 0,532981587 |
| SNX2     | -0,617208863 | 3,982693923  | 0,162743414 | 0,532992862 |
| ZNF260   | 1,239532398  | 6,078675397  | 0,162797612 | 0,532992862 |
| TMEM41B  | -0,613151123 | 3,576561528  | 0,162820005 | 0,532992862 |
| MTA2     | 0,821846886  | 6,533735096  | 0,162842287 | 0,532992862 |
| ARHGEF9  | -0,581240211 | 4,62414687   | 0,162915768 | 0,532992862 |
| ARRDC1   | -0,605490438 | 4,583382939  | 0,163053434 | 0,532992862 |
| RNASEH2A | 1,029714575  | 4,783513413  | 0,163111584 | 0,532992862 |
| AP3B1    | -0,617332694 | 5,132969716  | 0,163185757 | 0,532992862 |
| SLC30A7  | -0,622005664 | 5,20370335   | 0,163231939 | 0,532992862 |
| ZFAND2A  | 0,714304504  | 5,379879903  | 0,163379067 | 0,532992862 |
| RPS16    | 1,372974007  | 12,396664649 | 0,163389531 | 0,532992862 |
| PICALM   | 0,93165802   | 6,620316194  | 0,163456513 | 0,532992862 |
| KLHDC5   | 1,181726024  | 6,11301471   | 0,163516801 | 0,532992862 |
| AKIRIN1  | 0,715347873  | 7,244976777  | 0,163779    | 0,53351778  |

|          |              |             |             |             |
|----------|--------------|-------------|-------------|-------------|
| GMCL1    | 0,7016215    | 4,734730866 | 0,16383432  | 0,53351778  |
| RHOBTB3  | 0,987651506  | 6,776958808 | 0,163917849 | 0,533534994 |
| GOLGA4   | 0,809680591  | 6,514835089 | 0,164010087 | 0,533580526 |
| ZDHHC18  | -0,535764327 | 5,868555387 | 0,164234259 | 0,534055036 |
| MC1R     | 1,096102808  | 5,103696179 | 0,164315051 | 0,534056544 |
| PSMA6    | 0,825436047  | 8,141651484 | 0,16439136  | 0,534056544 |
| MAP2K4   | 0,725008506  | 5,77441785  | 0,164598731 | 0,534475594 |
| MRPS6    | 0,905126316  | 6,56933361  | 0,165014388 | 0,535570259 |
| LOXL2    | 0,896539602  | 6,987307704 | 0,165113229 | 0,535636113 |
| GGA3     | 0,888146799  | 5,300971566 | 0,165209516 | 0,535693625 |
| FEN1     | 0,886081642  | 4,507665767 | 0,165316711 | 0,535786433 |
| SLC25A3  | 0,778822871  | 8,287074213 | 0,1656451   | 0,535944849 |
| ADAT1    | 0,681338619  | 5,699854011 | 0,165729906 | 0,535944849 |
| ABCA5    | -0,817726827 | 5,565560664 | 0,165891401 | 0,535944849 |
| ZNF511   | 0,88824787   | 4,080455641 | 0,165892502 | 0,535944849 |
| PTP4A3   | -0,913576029 | 5,047353018 | 0,165994606 | 0,535944849 |
| EFNB1    | -0,702780656 | 6,699450599 | 0,165998943 | 0,535944849 |
| UFD1L    | 0,674888889  | 6,289349045 | 0,166110282 | 0,535944849 |
| GNPAT    | 0,833432271  | 5,925950934 | 0,166125301 | 0,535944849 |
| SUN2     | -0,615703257 | 7,185407504 | 0,166127776 | 0,535944849 |
| MINA     | 0,775382773  | 5,475188463 | 0,166151549 | 0,535944849 |
| KIAA0020 | 0,837720059  | 6,700536909 | 0,166768298 | 0,537679918 |
| GTF2H4   | 0,789780415  | 5,962352123 | 0,16693304  | 0,537862699 |
| APOOL    | 0,800745779  | 5,670052098 | 0,166982744 | 0,537862699 |
| EEF2K    | -0,60216601  | 4,831514044 | 0,167423526 | 0,538678579 |
| UBXN2A   | 0,770796095  | 5,389924564 | 0,167466134 | 0,538678579 |
| POLR1C   | 0,885003594  | 5,258512487 | 0,167476613 | 0,538678579 |
| TANC2    | 0,746058298  | 6,322840233 | 0,167552026 | 0,538678579 |
| PA2G4    | 0,738952602  | 7,718190768 | 0,167642648 | 0,538715936 |
| BHLHE40  | -0,639702021 | 8,103453799 | 0,167760181 | 0,538839696 |
| FAM134A  | -0,589908073 | 5,88247548  | 0,167867303 | 0,538929915 |
| SYNCRIP  | 0,686172256  | 7,802782623 | 0,168491078 | 0,540464061 |
| MAP3K2   | 0,585542746  | 6,606721104 | 0,16852856  | 0,540464061 |
| TMEM141  | 0,571946837  | 6,121925448 | 0,168582938 | 0,540464061 |
| MYEOV2   | 0,631591457  | 9,06306121  | 0,168701963 | 0,540591489 |
| SUCLG1   | -0,546870053 | 4,96402904  | 0,168979101 | 0,540604717 |
| SNX14    | -0,702810982 | 5,511196155 | 0,169017168 | 0,540604717 |
| SYK      | -0,639503178 | 4,659177681 | 0,169023373 | 0,540604717 |
| CUL2     | 0,943908659  | 5,730980476 | 0,169072607 | 0,540604717 |
| CLCC1    | -0,685738243 | 5,066248968 | 0,169102487 | 0,540604717 |
| PMS2L2   | 0,692616356  | 5,187320857 | 0,169424891 | 0,5413816   |
| NOL7     | 0,777032405  | 7,001710863 | 0,169790625 | 0,542090453 |
| ARL3     | 0,70693272   | 6,940043754 | 0,16980572  | 0,542090453 |
| TPM2     | 1,924765382  | 8,818910955 | 0,169913162 | 0,54217962  |
| MRPS7    | 0,774805003  | 6,123956376 | 0,170031075 | 0,542302105 |
| EGLN3    | 1,12306724   | 6,003925418 | 0,170123415 | 0,542342948 |
| RPS5     | 0,813067062  | 10,54599917 | 0,170491906 | 0,542880442 |
| HDAC3    | 0,69299163   | 6,728011734 | 0,170506047 | 0,542880442 |
| LRP6     | -0,753388881 | 6,361330372 | 0,17054104  | 0,542880442 |
| PPP3CA   | -0,654233287 | 5,922541309 | 0,170610469 | 0,542880442 |

|          |              |             |             |             |
|----------|--------------|-------------|-------------|-------------|
| ACTN1    | 0,802176011  | 8,753779293 | 0,170760296 | 0,543103758 |
| RFC3     | 0,858789706  | 4,578438324 | 0,171451244 | 0,544729519 |
| PPP1R10  | -0,648699489 | 5,394981363 | 0,171497021 | 0,544729519 |
| DAB2IP   | -0,655121454 | 6,001248895 | 0,171511113 | 0,544729519 |
| C1R      | -0,900341798 | 7,48812146  | 0,171853108 | 0,545067706 |
| SLC25A1  | 1,072479204  | 6,930792499 | 0,171886978 | 0,545067706 |
| MIP      | 0,649548028  | 6,245168358 | 0,171899705 | 0,545067706 |
| IL13RA1  | 0,991994098  | 6,715462423 | 0,171985956 | 0,545067706 |
| ANGPTL2  | -0,802207526 | 5,892421764 | 0,172027244 | 0,545067706 |
| RPA2     | 0,687135896  | 5,808490689 | 0,172097195 | 0,545067706 |
| ANP32A   | 0,696970176  | 7,562366824 | 0,172408539 | 0,54559745  |
| LANCL1   | -0,649038464 | 5,387636828 | 0,172424476 | 0,54559745  |
| TAF5L    | 0,738684081  | 5,397980865 | 0,172705517 | 0,545979304 |
| MYBBP1A  | 0,737744682  | 7,14745425  | 0,172729714 | 0,545979304 |
| COX7B    | 0,790518209  | 8,407891692 | 0,172911443 | 0,545979304 |
| SH2B1    | -0,775737391 | 6,149555248 | 0,172917239 | 0,545979304 |
| NACC1    | 0,786763923  | 6,122130024 | 0,172997571 | 0,545979304 |
| NSMCE2   | 0,803316276  | 5,444474902 | 0,173025557 | 0,545979304 |
| SLC31A1  | -0,686746333 | 5,49028731  | 0,173318674 | 0,546445192 |
| F13A1    | 1,127655873  | 7,129663657 | 0,173333473 | 0,546445192 |
| SGCB     | -0,665282635 | 5,645893304 | 0,173563849 | 0,546918616 |
| SMNDC1   | 0,76091913   | 5,60216017  | 0,173689465 | 0,547061645 |
| MRPS33   | 0,768116501  | 4,154415748 | 0,173991926 | 0,547761284 |
| SMYD4    | -0,679934514 | 2,860900194 | 0,174276318 | 0,548212774 |
| GTF3C1   | -0,58582884  | 6,506057701 | 0,174296128 | 0,548212774 |
| PPP1R15A | -0,682713184 | 7,441356557 | 0,174627724 | 0,54880892  |
| NGFRAP1  | 0,979695947  | 6,85725259  | 0,174646628 | 0,54880892  |
| BCL9L    | 0,892563086  | 7,770284075 | 0,1748146   | 0,549074836 |
| C11orf73 | 0,69452797   | 5,693872899 | 0,174916884 | 0,549074836 |
| PPT2     | 0,837502682  | 6,164598048 | 0,174972814 | 0,549074836 |
| PGP      | 0,857153406  | 4,794922536 | 0,175251573 | 0,549696632 |
| BCLAF1   | -0,558279302 | 6,591860566 | 0,175339638 | 0,549719995 |
| TRIM25   | -0,521484194 | 5,59358595  | 0,175528993 | 0,549769411 |
| REL      | -0,580639588 | 5,639175419 | 0,175555393 | 0,549769411 |
| PRKCD    | -0,582553934 | 4,506263196 | 0,175618403 | 0,549769411 |
| POLR2D   | 0,69398402   | 5,679598185 | 0,175714061 | 0,549769411 |
| PACSIN2  | -0,528124484 | 6,285951379 | 0,175876676 | 0,549769411 |
| UBL4A    | 0,785885726  | 4,834860851 | 0,175946222 | 0,549769411 |
| DOCK7    | 0,813572318  | 4,292579089 | 0,176049459 | 0,549769411 |
| KRT18    | 1,200130645  | 8,691351006 | 0,17606526  | 0,549769411 |
| MICAL3   | 1,038536766  | 6,219139205 | 0,176212971 | 0,549769411 |
| ZNF22    | 1,117824941  | 5,776343287 | 0,176231812 | 0,549769411 |
| ZNF264   | -0,526541505 | 5,687265912 | 0,176242254 | 0,549769411 |
| PAK4     | 1,229829078  | 7,855560678 | 0,176678173 | 0,55041349  |
| CRKL     | 1,081925127  | 6,436164592 | 0,17676235  | 0,55041349  |
| CYP51A1  | 0,69993359   | 6,92059832  | 0,176830998 | 0,55041349  |
| ZNF426   | 0,806583804  | 4,965868386 | 0,177002246 | 0,55041349  |
| AGL      | 0,744525368  | 5,564189253 | 0,177192821 | 0,55041349  |
| NES      | -0,736806902 | 8,309536552 | 0,177210144 | 0,55041349  |
| RNGTT    | -0,630631043 | 3,518823896 | 0,177259668 | 0,55041349  |

|          |              |             |             |             |
|----------|--------------|-------------|-------------|-------------|
| GNA11    | -0,638143644 | 5,317592671 | 0,177304312 | 0,55041349  |
| SPEN     | -0,660496357 | 6,342432361 | 0,177455997 | 0,55041349  |
| ZNF7     | 0,761894312  | 4,834777765 | 0,177514471 | 0,55041349  |
| RPLP0    | 0,732828577  | 12,2073059  | 0,177519155 | 0,55041349  |
| MYNN     | 0,909631046  | 5,782814111 | 0,177755239 | 0,55041349  |
| FBXO46   | 0,749276193  | 4,163666398 | 0,177797084 | 0,55041349  |
| ADAM8    | 1,14039138   | 4,552732898 | 0,177837046 | 0,55041349  |
| IFITM1   | -0,691303853 | 9,642746282 | 0,177858118 | 0,55041349  |
| CCDC117  | 0,640099835  | 6,128041431 | 0,178088387 | 0,55041349  |
| RAD50    | 0,780587617  | 5,54922451  | 0,178183373 | 0,55041349  |
| CRY1     | 0,751836546  | 5,752740719 | 0,17822258  | 0,55041349  |
| MAML2    | -0,628191219 | 5,836473221 | 0,178365286 | 0,55041349  |
| YIPF5    | 0,662207045  | 7,565368136 | 0,17858666  | 0,55041349  |
| SAMD4B   | 1,139524969  | 7,767050641 | 0,178601789 | 0,55041349  |
| RPS2     | 1,032354024  | 11,02131154 | 0,178631266 | 0,55041349  |
| GLT8D1   | 0,617437715  | 6,786427354 | 0,178728433 | 0,55041349  |
| VEZT     | 0,5798665    | 7,367229237 | 0,178742316 | 0,55041349  |
| LRCH4    | -0,549486402 | 6,098907087 | 0,178754102 | 0,55041349  |
| ATG2A    | -0,599656234 | 5,106301476 | 0,178783461 | 0,55041349  |
| ARL5A    | 0,697198558  | 6,864870076 | 0,17879423  | 0,55041349  |
| HECA     | -0,629605651 | 5,839593408 | 0,178921692 | 0,55041349  |
| TMSB10   | 0,814510851  | 12,58738837 | 0,179073938 | 0,55041349  |
| PSMB2    | 0,609577677  | 8,981615605 | 0,179084806 | 0,55041349  |
| SIKE1    | 0,697032169  | 6,272952141 | 0,179151615 | 0,55041349  |
| ZNF33B   | 0,93086225   | 5,103657892 | 0,179265787 | 0,55041349  |
| MRPS18C  | 0,67558354   | 6,044450509 | 0,17929042  | 0,55041349  |
| CAND1    | 0,722635924  | 7,272554996 | 0,179382895 | 0,55041349  |
| PWP2     | 0,776458317  | 5,249469885 | 0,179530423 | 0,55041349  |
| GOSR2    | 0,793307044  | 5,314268674 | 0,179593994 | 0,55041349  |
| RNF34    | 0,687039193  | 5,849521921 | 0,179609445 | 0,55041349  |
| ACBD3    | 0,680525335  | 6,466080389 | 0,179671239 | 0,55041349  |
| ANKMY1   | -0,656999489 | 4,60549514  | 0,179674382 | 0,55041349  |
| CFL1     | 0,623390267  | 11,17641617 | 0,179707732 | 0,55041349  |
| HK1      | 0,63075812   | 5,280472185 | 0,179758153 | 0,55041349  |
| GSPT2    | 1,010814763  | 4,974531027 | 0,179989772 | 0,55087534  |
| EID2     | 0,782843627  | 5,312642975 | 0,180160609 | 0,550947779 |
| NDFIP1   | -0,543440271 | 6,394224519 | 0,180243013 | 0,550947779 |
| UXS1     | -0,529208388 | 5,58414956  | 0,180255829 | 0,550947779 |
| CIITA    | -0,740381859 | 6,661688375 | 0,18048376  | 0,551342561 |
| GOLGA7   | 0,982619807  | 7,664000328 | 0,180579441 | 0,551342561 |
| MRPL23   | -0,667052111 | 6,065696135 | 0,180627553 | 0,551342561 |
| SLC19A2  | -0,560398329 | 3,474521432 | 0,180785161 | 0,55157674  |
| CD151    | -0,612899363 | 7,923884741 | 0,181059384 | 0,551876103 |
| SNRPF    | 0,752322792  | 7,649160215 | 0,181119501 | 0,551876103 |
| CTTN     | 0,752957198  | 8,171219198 | 0,181126077 | 0,551876103 |
| SDHAF2   | -0,54158593  | 5,635316558 | 0,181391751 | 0,552438745 |
| SEC61A2  | 0,740041417  | 4,425179769 | 0,181592947 | 0,552804601 |
| PSMC4    | 1,040556754  | 7,57034306  | 0,181760033 | 0,553066338 |
| SLC7A6OS | 0,652275134  | 4,885065125 | 0,181990086 | 0,553371874 |
| FAM120B  | -0,555241209 | 4,811006523 | 0,18208491  | 0,553371874 |

|          |              |             |             |             |
|----------|--------------|-------------|-------------|-------------|
| WWP2     | -0,53973344  | 5,964975859 | 0,182103899 | 0,553371874 |
| TRNP1    | 0,870820185  | 5,403110984 | 0,182640563 | 0,554755455 |
| EIF2AK2  | 0,707776383  | 7,658544456 | 0,182726181 | 0,554768402 |
| LUM      | -0,929802362 | 9,949191844 | 0,182808096 | 0,554770097 |
| PELP1    | 0,908171762  | 7,035863121 | 0,18308169  | 0,555171275 |
| MALL     | -0,750944185 | 7,67878603  | 0,183103123 | 0,555171275 |
| C17orf70 | 0,726442182  | 3,949978933 | 0,18321888  | 0,555275353 |
| HAPLN3   | 0,914846562  | 4,348212065 | 0,183425438 | 0,555654405 |
| BAK1     | 0,734715723  | 5,457486963 | 0,183539661 | 0,55575353  |
| SEC61B   | -0,518882989 | 7,80900037  | 0,184049511 | 0,557049983 |
| ZNF800   | -0,589202995 | 5,98354693  | 0,184434129 | 0,55773546  |
| ALKBH8   | 0,838030432  | 4,565323593 | 0,184590223 | 0,55773546  |
| PLEKHA2  | -0,776781374 | 5,366395733 | 0,184625557 | 0,55773546  |
| TMED10P1 | 1,093394423  | 5,027552979 | 0,184648102 | 0,55773546  |
| ZFYVE21  | -0,549344274 | 4,458269091 | 0,184684949 | 0,55773546  |
| EIF2B2   | -0,602863396 | 4,920878063 | 0,185238678 | 0,559056008 |
| PHB2     | 0,630194914  | 8,191666053 | 0,185286197 | 0,559056008 |
| ZBED5    | -0,572526888 | 4,283394315 | 0,185453428 | 0,559313103 |
| ABCF1    | 0,626019986  | 6,579269976 | 0,185780771 | 0,559879914 |
| WDR60    | -0,637622947 | 4,03628766  | 0,185805579 | 0,559879914 |
| RPL32    | 0,816151821  | 11,2840226  | 0,185968022 | 0,560057635 |
| OST4     | 0,591853543  | 7,98026193  | 0,186028823 | 0,560057635 |
| ERAL1    | 0,738767144  | 6,519894748 | 0,186382804 | 0,560757214 |
| NDUFB7   | 0,855395359  | 7,347789912 | 0,186497665 | 0,560757214 |
| PSEN1    | -0,551403231 | 5,606645001 | 0,186507899 | 0,560757214 |
| SLC35B1  | 0,667968614  | 6,709098285 | 0,187021989 | 0,562055064 |
| CHPF     | 0,883739334  | 6,29082128  | 0,187232929 | 0,562312742 |
| IP6K1    | -0,610253716 | 4,962349942 | 0,187272655 | 0,562312742 |
| PSD3     | 0,912626317  | 4,903002021 | 0,187630099 | 0,563093584 |
| TMEM69   | 0,771756321  | 5,979820787 | 0,187733387 | 0,563093584 |
| ACTL6A   | 0,807351312  | 4,986239413 | 0,187841072 | 0,563093584 |
| GALT     | 0,690574002  | 3,737228717 | 0,188064657 | 0,563093584 |
| FDPS     | 0,736068693  | 5,879172577 | 0,188257138 | 0,563093584 |
| MYH10    | -0,886333433 | 7,310594553 | 0,188283626 | 0,563093584 |
| MCM3AP   | 0,67172757   | 5,686892077 | 0,188456336 | 0,563093584 |
| SNHG12   | 0,649740156  | 5,498023679 | 0,188539898 | 0,563093584 |
| CYTH1    | -0,676914126 | 5,865624016 | 0,188560344 | 0,563093584 |
| NAA15    | 0,878102907  | 5,66892499  | 0,188635839 | 0,563093584 |
| DDX51    | 0,847024298  | 5,510345635 | 0,188639347 | 0,563093584 |
| CFL2     | 1,042528934  | 7,049786847 | 0,188659237 | 0,563093584 |
| SPARCL1  | -1,090417154 | 9,078972256 | 0,188738721 | 0,563093584 |
| C2orf49  | 0,627454542  | 6,159255326 | 0,188796866 | 0,563093584 |
| GLRX     | -0,698325774 | 5,545901374 | 0,188798746 | 0,563093584 |
| RPL7A    | 0,711372893  | 11,3694869  | 0,188853941 | 0,563093584 |
| HSBP1    | 0,650068241  | 7,161543069 | 0,18917551  | 0,563625844 |
| ITPRIPL2 | 0,760510126  | 7,753893339 | 0,189385593 | 0,563625844 |
| LY75     | -0,674680497 | 3,791157451 | 0,189450887 | 0,563625844 |
| TRIM28   | 0,634489571  | 7,697234208 | 0,189575631 | 0,563625844 |
| UBE2L3   | 0,65091278   | 8,050738333 | 0,189705069 | 0,563625844 |
| NDUFA3   | -0,54499188  | 6,492627034 | 0,189765055 | 0,563625844 |

|          |              |             |             |             |
|----------|--------------|-------------|-------------|-------------|
| AP3S1    | 0,881319805  | 6,264157797 | 0,189781229 | 0,563625844 |
| TIPIN    | 0,726498438  | 4,901984649 | 0,189847692 | 0,563625844 |
| NUMA1    | -0,473752488 | 7,323781703 | 0,189858398 | 0,563625844 |
| MXD4     | -0,609657762 | 6,605716856 | 0,189913226 | 0,563625844 |
| GRWD1    | 0,647017139  | 6,09431577  | 0,190023671 | 0,563625844 |
| ACLY     | 0,629289823  | 7,453746116 | 0,190024317 | 0,563625844 |
| ZNF585A  | 1,008521215  | 6,052226347 | 0,190196515 | 0,563834554 |
| IPO4     | 0,669874174  | 5,643463725 | 0,190307656 | 0,563834554 |
| GLCE     | -0,593192012 | 3,602512612 | 0,19034274  | 0,563834554 |
| CCDC82   | -0,629301257 | 4,514469331 | 0,190577051 | 0,564283505 |
| ZRSR2    | -0,579940243 | 3,48216168  | 0,190942384 | 0,564875581 |
| ZDHHC9   | 0,706802667  | 6,438905189 | 0,191163569 | 0,564875581 |
| MTSS1    | -0,696411183 | 5,532173022 | 0,191178801 | 0,564875581 |
| HNRNPA1  | 0,765773333  | 6,664885136 | 0,19119034  | 0,564875581 |
| PPM1D    | -0,586129653 | 4,484607468 | 0,191217082 | 0,564875581 |
| IFITM3   | -0,668720573 | 9,640143107 | 0,191274046 | 0,564875581 |
| DTX3     | -0,583180541 | 6,175772247 | 0,191446762 | 0,565140896 |
| NDUFS8   | 0,59059889   | 7,350554146 | 0,191588681 | 0,565315109 |
| HAT1     | 0,885995151  | 6,979361997 | 0,191804718 | 0,565535851 |
| UNC119B  | -0,53689709  | 4,505597672 | 0,191956675 | 0,565535851 |
| GRB2     | -0,621110053 | 6,287838624 | 0,191959206 | 0,565535851 |
| PPIB     | 0,662642431  | 9,943904733 | 0,19220036  | 0,565535851 |
| CDKN1A   | -0,733065852 | 7,623021078 | 0,192402014 | 0,565535851 |
| YTHDF1   | 0,599838803  | 6,674855699 | 0,192448249 | 0,565535851 |
| PUM1     | -0,587500323 | 5,676455385 | 0,192449358 | 0,565535851 |
| TRAP1    | 0,604800839  | 4,798207908 | 0,192490359 | 0,565535851 |
| SON      | 0,607203384  | 7,889431706 | 0,192536995 | 0,565535851 |
| RNF135   | -0,576745882 | 5,013866646 | 0,192693909 | 0,565535851 |
| SMCR7L   | 0,676470375  | 4,992834561 | 0,1927544   | 0,565535851 |
| SLC25A22 | 0,789573243  | 5,46167617  | 0,192766646 | 0,565535851 |
| POLDIP2  | 0,788954722  | 5,998874145 | 0,192766714 | 0,565535851 |
| DLST     | -0,526943416 | 6,544684682 | 0,192824586 | 0,565535851 |
| HSPE1    | 0,678973197  | 7,052018391 | 0,19308859  | 0,565941009 |
| MAD1L1   | -0,570598995 | 4,847144089 | 0,193145973 | 0,565941009 |
| CAP2     | 0,863512563  | 4,278959507 | 0,193211713 | 0,565941009 |
| NDUFA2   | -0,655727424 | 6,478652818 | 0,193529893 | 0,566629601 |
| SFMBT2   | 0,751006909  | 5,450752904 | 0,193782341 | 0,567125229 |
| SEPT7P2  | -0,547093777 | 5,506763862 | 0,194049704 | 0,567465884 |
| MED23    | -0,551798579 | 4,498431651 | 0,194065177 | 0,567465884 |
| HSD3B7   | 0,734893733  | 4,418005454 | 0,194180127 | 0,567502361 |
| MRPL20   | 0,565984434  | 7,766456323 | 0,194244099 | 0,567502361 |
| TNIP2    | 0,827432237  | 5,697536054 | 0,194566613 | 0,56820117  |
| SAC3D1   | 0,740857949  | 3,411619018 | 0,194738566 | 0,56845988  |
| GHITM    | 0,669313044  | 6,962773314 | 0,194993859 | 0,568961542 |
| FAM91A1  | 0,699732249  | 6,896371876 | 0,195232904 | 0,56922794  |
| NVL      | 0,677476874  | 4,695553869 | 0,195369176 | 0,56922794  |
| GFM2     | 0,715401746  | 5,149050185 | 0,19541115  | 0,56922794  |
| PREB     | 0,642770344  | 5,849337706 | 0,195419066 | 0,56922794  |
| GPX4     | -0,518137233 | 7,875500524 | 0,195528091 | 0,569230196 |
| YEATS2   | 0,976978041  | 7,335736242 | 0,195685668 | 0,569230196 |



|         |              |             |             |             |
|---------|--------------|-------------|-------------|-------------|
| LHFPL2  | 0,826714465  | 5,79687554  | 0,195749426 | 0,569230196 |
| LSG1    | 0,766395817  | 4,549498311 | 0,195757782 | 0,569230196 |
| DYNC1H1 | 0,575292757  | 7,404459834 | 0,195906477 | 0,569230196 |
| TMEM160 | 0,715339969  | 5,063379639 | 0,195920703 | 0,569230196 |
| CHD1L   | 0,90248208   | 3,912984089 | 0,196314293 | 0,570092049 |
| EP300   | -0,701059149 | 4,813426726 | 0,196384547 | 0,570092049 |
| RLIM    | 0,65959013   | 6,980670055 | 0,196802965 | 0,570822087 |
| ATP2B4  | -0,615171436 | 7,691707678 | 0,196880682 | 0,570822087 |
| TIA1    | 0,868080673  | 6,153237564 | 0,196920739 | 0,570822087 |
| STEAP3  | 0,850204275  | 6,649038599 | 0,196970871 | 0,570822087 |
| SIRT1   | -0,516366144 | 3,997214967 | 0,197187618 | 0,571135639 |
| ABCA11P | 0,737959627  | 6,225864869 | 0,19724658  | 0,571135639 |
| FAM192A | 0,560746729  | 6,407582164 | 0,197436738 | 0,571443598 |
| UBA5    | 0,612193904  | 4,755800613 | 0,197574704 | 0,571591606 |
| COPB2   | 0,663875796  | 7,180951582 | 0,197699845 | 0,571591606 |
| PLEKHG2 | 1,413766471  | 7,379886891 | 0,197739346 | 0,571591606 |
| ADCY3   | -0,591428678 | 5,275190373 | 0,19811042  | 0,572421591 |
| PMM2    | 0,752323884  | 5,358656195 | 0,198236394 | 0,572484632 |
| COX7A2L | 0,777867336  | 5,594752784 | 0,19838106  | 0,572484632 |
| ZNF670  | -0,59888674  | 3,210588994 | 0,198384101 | 0,572484632 |
| ITGA2   | 1,284884834  | 5,968161291 | 0,198555002 | 0,572735431 |
| RPL11   | 0,652219158  | 12,43612599 | 0,199003763 | 0,573787171 |
| PPM1B   | -0,566933637 | 6,57249778  | 0,199097701 | 0,573815394 |
| GDAP2   | -0,492568096 | 5,279729079 | 0,199321365 | 0,574217316 |
| RFWD2   | 0,594688759  | 6,367915373 | 0,199703547 | 0,575075375 |
| RAB7L1  | 0,742859493  | 4,468075488 | 0,199859257 | 0,575146048 |
| ZDHHC17 | -0,604313104 | 4,342089252 | 0,199896779 | 0,575146048 |
| CINP    | 0,699937611  | 5,830631263 | 0,200220497 | 0,575292096 |
| NECAB3  | -0,729854767 | 4,315113023 | 0,200389564 | 0,575292096 |
| NOL10   | 0,718220086  | 5,777320782 | 0,200417917 | 0,575292096 |
| SLC44A3 | -0,675381132 | 3,108278515 | 0,200451983 | 0,575292096 |
| PLEKHA3 | -0,656905292 | 5,303368012 | 0,200492604 | 0,575292096 |
| CLDN1   | 1,118547107  | 7,724909347 | 0,20061577  | 0,575292096 |
| HUS1    | -0,469116689 | 4,51483801  | 0,200677962 | 0,575292096 |
| FAM46C  | -0,80773831  | 6,548235633 | 0,200687316 | 0,575292096 |
| EPB41L3 | -0,600751463 | 5,277742474 | 0,200706833 | 0,575292096 |
| BTRC    | 0,801455645  | 4,99769619  | 0,200809806 | 0,575345405 |
| RAD9A   | 0,800223199  | 4,362635198 | 0,200911064 | 0,575393762 |
| ZNF397  | -0,628774142 | 3,679947568 | 0,201088966 | 0,575510567 |
| EIF3B   | 0,62984334   | 7,097758704 | 0,201217942 | 0,575510567 |
| TMEM133 | -0,581503849 | 5,246946523 | 0,201243927 | 0,575510567 |
| IKZF5   | -0,661608972 | 4,593450833 | 0,201364838 | 0,575510567 |
| TRIP12  | 0,574202556  | 6,817223259 | 0,20137384  | 0,575510567 |
| INO80   | -0,568375083 | 6,145508879 | 0,201736206 | 0,5760249   |
| ARF1    | -0,503943126 | 8,909697421 | 0,201777058 | 0,5760249   |
| PTTG1IP | -0,519903673 | 6,515193296 | 0,201807228 | 0,5760249   |
| NDUFA11 | -0,693141078 | 6,35008337  | 0,202029716 | 0,576378568 |
| MKKS    | 0,561972384  | 4,613370226 | 0,202100184 | 0,576378568 |
| SNRPA   | 1,164028072  | 7,17653818  | 0,202384725 | 0,576670363 |
| EXOC5   | 0,831497206  | 6,647282765 | 0,202418464 | 0,576670363 |

|           |              |             |             |             |
|-----------|--------------|-------------|-------------|-------------|
| FHL2      | 0,95815846   | 6,465959018 | 0,202456203 | 0,576670363 |
| RFX3      | -0,631669828 | 4,670150442 | 0,202765977 | 0,577311564 |
| C11orf84  | 0,857716357  | 4,264378669 | 0,202959819 | 0,577622289 |
| PRKCSH    | -0,665818895 | 7,518984287 | 0,203076419 | 0,577713018 |
| MRPL42    | 0,632240576  | 5,442995344 | 0,203725314 | 0,57902928  |
| KIAA1279  | 0,714743743  | 5,464566511 | 0,203774497 | 0,57902928  |
| GPX1      | -0,529657563 | 9,324750748 | 0,203861407 | 0,57902928  |
| CBY1      | -0,572486844 | 4,022383349 | 0,203878765 | 0,57902928  |
| ATP6V1E1  | -0,513236862 | 7,087621154 | 0,204070513 | 0,57910801  |
| PDDC1     | 0,599134773  | 4,57031147  | 0,204076338 | 0,57910801  |
| RPP14     | 0,800339848  | 4,219144388 | 0,20430022  | 0,5792126   |
| MMADHC    | 0,784070904  | 7,0801869   | 0,204347913 | 0,5792126   |
| BLOC1S1   | -0,520291144 | 5,862577448 | 0,204368018 | 0,5792126   |
| ZNF652    | -0,492917257 | 5,409325206 | 0,204479477 | 0,579223615 |
| DDOST     | 0,611059611  | 8,787903385 | 0,204633567 | 0,579223615 |
| SMCR8     | -0,657250997 | 5,984576512 | 0,204697806 | 0,579223615 |
| BTN3A2    | -0,648265092 | 5,55354054  | 0,204788562 | 0,579223615 |
| GBP5      | 1,111352286  | 6,053700815 | 0,204796618 | 0,579223615 |
| VPS26A    | 0,838762894  | 7,041546915 | 0,204942481 | 0,579395844 |
| PIH1D1    | 0,85919707   | 4,960967601 | 0,205666644 | 0,58099036  |
| CDIPT     | -0,449024072 | 7,365202676 | 0,205682607 | 0,58099036  |
| POLR2L    | -0,516473655 | 9,275819507 | 0,205767791 | 0,58099036  |
| PDHX      | 0,67402161   | 6,122898363 | 0,205847296 | 0,58099036  |
| CD7       | -0,589781091 | 4,553586052 | 0,205992776 | 0,581124712 |
| AEBP1     | -0,730949899 | 7,385343822 | 0,20606534  | 0,581124712 |
| NDUFS6    | 0,85912122   | 6,921689357 | 0,206161373 | 0,58115519  |
| FOXC1     | 1,149683525  | 4,741574264 | 0,206460938 | 0,581343873 |
| MTA1      | 0,767974764  | 7,327818292 | 0,206524127 | 0,581343873 |
| SNX21     | 0,84495907   | 6,02007594  | 0,206525545 | 0,581343873 |
| MXRA5     | 1,077452898  | 7,300401111 | 0,206569322 | 0,581343873 |
| ELAVL1    | 0,614955955  | 5,577877926 | 0,20674922  | 0,581540527 |
| SBNO2     | -0,564898154 | 5,942828493 | 0,206809764 | 0,581540527 |
| MBNL1     | 0,690771124  | 6,336836595 | 0,206944345 | 0,581679096 |
| AP2B1     | -0,519223041 | 7,370065461 | 0,207296866 | 0,582190556 |
| CLDN12    | 0,911313241  | 6,468053723 | 0,20736227  | 0,582190556 |
| STK25     | -0,638984666 | 6,183361807 | 0,207441113 | 0,582190556 |
| FNIP2     | -0,571603765 | 5,923043357 | 0,207467818 | 0,582190556 |
| STAU1     | 0,733341486  | 4,985304005 | 0,208587277 | 0,585091172 |
| IRS1      | 0,640414977  | 6,681932081 | 0,208715743 | 0,585210795 |
| FKBP11    | -0,709310609 | 5,090379719 | 0,209300661 | 0,586609622 |
| UGCG      | 0,779847541  | 6,563444408 | 0,209486377 | 0,586888909 |
| CYFIP1    | -0,499526494 | 7,088306333 | 0,209618553 | 0,586944156 |
| NAT10     | 0,54417326   | 6,253048207 | 0,209678247 | 0,586944156 |
| LMNA      | -0,536014876 | 8,449608648 | 0,20993656  | 0,587426099 |
| CARKD     | 1,313325181  | 5,272269125 | 0,210215507 | 0,587582216 |
| ANXA7     | 0,692841225  | 8,427542137 | 0,210236222 | 0,587582216 |
| LOC728190 | 0,79206189   | 3,861707734 | 0,210328815 | 0,587582216 |
| PKN2      | -0,491482956 | 6,095691066 | 0,210337027 | 0,587582216 |
| MAP1S     | -0,480845833 | 5,85021783  | 0,210463432 | 0,587584148 |
| AEBP2     | 0,617899927  | 7,197942311 | 0,210517057 | 0,587584148 |

|          |              |             |             |             |
|----------|--------------|-------------|-------------|-------------|
| NCBP2    | 0,588996622  | 6,305147361 | 0,210596225 | 0,587584148 |
| NLN      | 0,827741193  | 4,465452126 | 0,21094418  | 0,588171241 |
| MVD      | -0,523307347 | 5,65041656  | 0,210979154 | 0,588171241 |
| M6PR     | -0,584570256 | 6,8671978   | 0,211142459 | 0,588208618 |
| NSUN2    | 0,653877288  | 6,328396901 | 0,211165082 | 0,588208618 |
| MRPS28   | 0,711104184  | 5,267666497 | 0,211322046 | 0,588405486 |
| CYTIP    | -0,723337752 | 6,300169929 | 0,211553504 | 0,588627133 |
| XPNPEP3  | -0,690402589 | 4,811451186 | 0,211597586 | 0,588627133 |
| HGSNAT   | -0,501820562 | 6,4553063   | 0,211660614 | 0,588627133 |
| LAMA4    | -0,717436211 | 6,473270182 | 0,211941152 | 0,58868243  |
| DHX32    | 0,761091769  | 5,167732149 | 0,212260702 | 0,58868243  |
| GNA15    | 0,977765965  | 5,68483004  | 0,212317004 | 0,58868243  |
| NOTCH1   | -0,603913048 | 7,631024714 | 0,212382007 | 0,58868243  |
| GSTO1    | -0,578832821 | 4,589328372 | 0,21248753  | 0,58868243  |
| IKBIP    | 0,837829889  | 5,620559807 | 0,212493395 | 0,58868243  |
| GPX7     | 0,987378278  | 4,316925495 | 0,212562233 | 0,58868243  |
| PCNP     | 0,676682935  | 8,556431816 | 0,212772358 | 0,58868243  |
| TRNT1    | 0,700105926  | 5,263199764 | 0,212773044 | 0,58868243  |
| NLK      | 0,813578214  | 5,716453538 | 0,212899635 | 0,58868243  |
| ZCRB1    | 0,979904451  | 6,095142924 | 0,212906347 | 0,58868243  |
| PLXNA3   | 0,794373864  | 6,668101613 | 0,212910162 | 0,58868243  |
| BLVRB    | -0,545590609 | 6,359270492 | 0,212928077 | 0,58868243  |
| IQGAP1   | -0,502101362 | 7,416379409 | 0,212961018 | 0,58868243  |
| DUSP14   | 0,833102162  | 5,123833494 | 0,212975444 | 0,58868243  |
| NUDCD2   | -0,454113349 | 6,151875538 | 0,213229502 | 0,588911729 |
| COMMD3   | 0,657325608  | 6,469756326 | 0,213268433 | 0,588911729 |
| C9orf3   | -0,625293304 | 4,357472475 | 0,213435204 | 0,588911729 |
| TMEM65   | 0,688157926  | 5,808092604 | 0,213475763 | 0,588911729 |
| POLR1B   | 0,738201394  | 5,11265667  | 0,213490218 | 0,588911729 |
| EBAG9    | 0,604661621  | 5,129853629 | 0,213885779 | 0,589460862 |
| SETD5    | 0,676070058  | 6,478405488 | 0,213891331 | 0,589460862 |
| NCDN     | 0,868435932  | 4,727984498 | 0,21401794  | 0,589460862 |
| CIR1     | 0,577617389  | 6,655998437 | 0,214035063 | 0,589460862 |
| TBCK     | -0,505223856 | 5,523211111 | 0,214231748 | 0,589596864 |
| C9orf78  | 0,516817608  | 7,369454592 | 0,214459118 | 0,589596864 |
| TRIB1    | -0,658794481 | 6,587140549 | 0,214585205 | 0,589596864 |
| SF3B2    | 0,653459521  | 7,541023194 | 0,214617026 | 0,589596864 |
| ABCF3    | 0,986070809  | 4,879204369 | 0,214659046 | 0,589596864 |
| TAF4     | 0,541961321  | 4,657483532 | 0,214738818 | 0,589596864 |
| ITGA6    | 1,260397848  | 7,981899173 | 0,214748834 | 0,589596864 |
| UTP20    | 0,73821585   | 4,613581748 | 0,214776156 | 0,589596864 |
| METTL3   | -0,530029752 | 5,578776994 | 0,214990794 | 0,589948582 |
| KIAA0284 | 1,010764252  | 4,684996608 | 0,215224292 | 0,590311767 |
| ARID4B   | -0,580751014 | 5,06925233  | 0,215342326 | 0,590311767 |
| KIAA1704 | -0,561198386 | 4,811902253 | 0,215382853 | 0,590311767 |
| SMARCA2  | -0,543893302 | 6,30008822  | 0,216029047 | 0,591844947 |
| EXOSC8   | 0,656266375  | 6,702082411 | 0,216275887 | 0,591882854 |
| UBL3     | -0,499117991 | 6,994986376 | 0,216342878 | 0,591882854 |
| RRP1     | 0,772481274  | 5,335613429 | 0,216430455 | 0,591882854 |
| TCF7L1   | -0,673759821 | 5,358428633 | 0,216430566 | 0,591882854 |

|          |              |             |             |             |
|----------|--------------|-------------|-------------|-------------|
| MEN1     | 0,711139333  | 4,995212685 | 0,216476879 | 0,591882854 |
| KIAA1109 | -0,536734274 | 7,029674002 | 0,216727229 | 0,592329851 |
| RHOA     | -0,527602704 | 9,013401159 | 0,217075338 | 0,593043561 |
| MEMO1    | 0,540925246  | 6,801880163 | 0,21757737  | 0,594111467 |
| CNNM3    | -0,663458511 | 5,773202623 | 0,217892057 | 0,594111467 |
| METAP2   | 0,768281773  | 7,429856899 | 0,217903648 | 0,594111467 |
| GFPT2    | 0,900760014  | 4,58082299  | 0,217940738 | 0,594111467 |
| DCAF16   | 0,868193779  | 6,26457415  | 0,218019845 | 0,594111467 |
| BCR      | 1,06640786   | 6,858895107 | 0,218074767 | 0,594111467 |
| MFAP1    | 0,622832212  | 5,761416201 | 0,218076111 | 0,594111467 |
| KIAA0947 | 0,68144181   | 4,766191809 | 0,218394467 | 0,59471011  |
| TSPAN5   | 0,9739838    | 5,626124354 | 0,218584014 | 0,59471011  |
| MPHOSPH9 | 0,909124214  | 4,737612782 | 0,218769488 | 0,59471011  |
| AKT2     | 1,057182471  | 6,20825976  | 0,218838304 | 0,59471011  |
| PRCC     | 0,605592741  | 6,179985669 | 0,218845781 | 0,59471011  |
| NR2F6    | 0,65561202   | 5,712104206 | 0,218920674 | 0,59471011  |
| CREB3L2  | -0,533596734 | 5,232613824 | 0,218947036 | 0,59471011  |
| CARM1    | 0,618594835  | 6,30247942  | 0,21899356  | 0,59471011  |
| SLC35D1  | 0,801616495  | 4,516122013 | 0,219258067 | 0,595191384 |
| MLF2     | 0,535571286  | 6,849238687 | 0,219494895 | 0,595525403 |
| SSR4     | -0,567244146 | 7,416470536 | 0,219556457 | 0,595525403 |
| CAPZB    | -0,43938334  | 7,379986004 | 0,219800836 | 0,595525403 |
| RBM5     | -0,69563788  | 6,703210535 | 0,219819722 | 0,595525403 |
| CCDC66   | -0,474914251 | 4,100654075 | 0,219840954 | 0,595525403 |
| RBBP7    | 0,636340703  | 6,340169819 | 0,219945933 | 0,595525403 |
| PTPRG    | -0,580626922 | 5,709031971 | 0,22001222  | 0,595525403 |
| APC      | -0,549642369 | 4,39168995  | 0,220387971 | 0,595525403 |
| DPH5     | 0,663224863  | 4,80828656  | 0,220443447 | 0,595525403 |
| TWSG1    | -0,527300836 | 6,028128442 | 0,220454421 | 0,595525403 |
| MIPEP    | 0,680919439  | 4,973174717 | 0,220536593 | 0,595525403 |
| TACSTD2  | 1,447318797  | 9,337308816 | 0,220576654 | 0,595525403 |
| HDLBP    | 0,60830354   | 8,72043631  | 0,22059717  | 0,595525403 |
| TMEM30A  | -0,505847994 | 6,931842144 | 0,220682325 | 0,595525403 |
| MRPL14   | 0,705846942  | 7,056317167 | 0,220691112 | 0,595525403 |
| ARRDC3   | -0,552291069 | 7,268749985 | 0,221134151 | 0,596267953 |
| NT5C     | 0,610155828  | 6,607520366 | 0,221141172 | 0,596267953 |
| VAPB     | 0,659998976  | 5,764490757 | 0,221667201 | 0,596963703 |
| MTMR2    | 0,563694531  | 5,931338107 | 0,221719102 | 0,596963703 |
| MAN1A2   | 0,658831386  | 7,001058223 | 0,221860695 | 0,596963703 |
| CDV3     | 0,57877757   | 8,261828416 | 0,222052624 | 0,596963703 |
| MAD2L1BP | 0,618343785  | 5,426873568 | 0,222129706 | 0,596963703 |
| BCAR3    | 0,770612088  | 5,85133855  | 0,222184301 | 0,596963703 |
| TAF2     | 0,704348579  | 5,523424878 | 0,222224969 | 0,596963703 |
| MITD1    | 0,730761891  | 6,432030202 | 0,222254439 | 0,596963703 |
| ANKRD17  | 0,881972077  | 7,163516271 | 0,22226462  | 0,596963703 |
| BAX      | -0,530305709 | 5,944684596 | 0,22227465  | 0,596963703 |
| POLD4    | 0,676827947  | 8,599046347 | 0,222709864 | 0,597722349 |
| FBXW9    | 0,834427725  | 4,223741659 | 0,222732437 | 0,597722349 |
| IL7      | -0,585818877 | 3,367962227 | 0,222901135 | 0,597939749 |
| EIF2S2   | 0,723406397  | 6,188674185 | 0,223229222 | 0,598548044 |

|           |              |             |             |             |
|-----------|--------------|-------------|-------------|-------------|
| P4HA2     | 0,688509678  | 6,81531202  | 0,22330345  | 0,598548044 |
| SUCLG2    | -0,520185647 | 5,881624508 | 0,223392776 | 0,598552197 |
| PXK       | -0,518904169 | 5,969109189 | 0,223528731 | 0,598681231 |
| TFE3      | 0,789605701  | 8,43215276  | 0,223733657 | 0,598784808 |
| CTNNB1    | 0,610498989  | 9,407970469 | 0,223743025 | 0,598784808 |
| TNS3      | -0,535261685 | 8,009032333 | 0,223859386 | 0,598811606 |
| ITPK1     | -0,708249181 | 5,660900896 | 0,223928669 | 0,598811606 |
| STAMPB    | 0,602300414  | 5,964497988 | 0,224050009 | 0,598901219 |
| PRDX6     | 0,539055447  | 8,900581365 | 0,22477707  | 0,600609263 |
| THOC7     | 0,601302518  | 7,066197432 | 0,225014937 | 0,601009343 |
| SOLH      | 0,653060781  | 4,939023631 | 0,225485797 | 0,601997695 |
| LIN9      | 0,704501338  | 3,546703586 | 0,225561536 | 0,601997695 |
| CLK4      | 0,621391855  | 4,116178915 | 0,225797529 | 0,602391765 |
| TMEM134   | 0,698667904  | 5,628155061 | 0,226091417 | 0,602939919 |
| POLR2J    | 0,653333125  | 6,419400588 | 0,226214717 | 0,603032899 |
| TPCN2     | 0,714208336  | 4,688835484 | 0,226681958 | 0,603474101 |
| PASK      | 1,073238631  | 4,354677538 | 0,226688291 | 0,603474101 |
| POLR2B    | 0,617717677  | 7,103455915 | 0,226720086 | 0,603474101 |
| KDM5B     | 0,583094784  | 6,585314655 | 0,226783262 | 0,603474101 |
| NAP1L1    | 0,883710701  | 9,50273106  | 0,226822719 | 0,603474101 |
| TMEM106A  | -0,686436675 | 4,553312787 | 0,227088551 | 0,60394572  |
| VOPP1     | -0,534585668 | 7,27093384  | 0,227300192 | 0,604272907 |
| RP9P      | 0,740194156  | 3,974805557 | 0,227407341 | 0,604322159 |
| LONRF1    | -0,625501516 | 5,658437583 | 0,22763598  | 0,604323628 |
| DPY19L4   | -0,582760722 | 3,914918224 | 0,227660131 | 0,604323628 |
| LOC349196 | -0,863955446 | 6,860282195 | 0,227775346 | 0,604323628 |
| RBM10     | -0,568222536 | 5,073363228 | 0,227826768 | 0,604323628 |
| C1orf109  | 0,658775622  | 4,555258353 | 0,227954827 | 0,604323628 |
| HIST2H2BE | 0,627326399  | 9,269644785 | 0,227959656 | 0,604323628 |
| TMEM59    | -0,504618102 | 7,384220818 | 0,228028259 | 0,604323628 |
| POP4      | 0,600607283  | 5,51556361  | 0,228330801 | 0,604605314 |
| CLIP3     | -0,610081735 | 5,401996753 | 0,228346474 | 0,604605314 |
| C4orf27   | -0,49860745  | 4,30828733  | 0,228400541 | 0,604605314 |
| HDGFRP3   | 0,838633694  | 6,654574867 | 0,228915575 | 0,604681466 |
| CCDC88C   | -0,58042081  | 5,575920546 | 0,228947668 | 0,604681466 |
| HIGD2A    | -0,521119907 | 6,992031628 | 0,228950084 | 0,604681466 |
| USP42     | -0,48857549  | 4,698738193 | 0,228984786 | 0,604681466 |
| SEP15     | -0,58880386  | 6,063458157 | 0,229021887 | 0,604681466 |
| RBM39     | -0,47261321  | 8,152561039 | 0,229035862 | 0,604681466 |
| LSM3      | 0,588678892  | 6,659399645 | 0,229050041 | 0,604681466 |
| ZNF542    | 1,176442628  | 6,467904013 | 0,22924823  | 0,604803022 |
| MMAB      | -0,593490699 | 3,869657857 | 0,229273473 | 0,604803022 |
| PLBD1     | -0,70190569  | 5,487921802 | 0,229510868 | 0,60488074  |
| PELI1     | -0,626624829 | 5,608139467 | 0,229736729 | 0,60488074  |
| SGPP1     | -0,569159669 | 5,94966969  | 0,229769445 | 0,60488074  |
| ACBD6     | 0,567788675  | 5,30802395  | 0,229794701 | 0,60488074  |
| NFIC      | -0,578489187 | 6,876102306 | 0,22982937  | 0,60488074  |
| EFTUD1    | 0,65054529   | 5,122244239 | 0,229835166 | 0,60488074  |
| DUSP6     | -0,775948037 | 7,398345901 | 0,230010082 | 0,604977446 |
| EDEM3     | 0,571285819  | 6,487451889 | 0,23004935  | 0,604977446 |

|           |              |             |             |             |
|-----------|--------------|-------------|-------------|-------------|
| CNPY4     | 0,806708562  | 4,373377777 | 0,230317503 | 0,605232692 |
| ANKRD11   | 0,789529643  | 6,668689858 | 0,230323924 | 0,605232692 |
| IPO5      | 0,588314463  | 5,681153328 | 0,230567793 | 0,60564013  |
| MSI2      | 0,699708023  | 5,729127486 | 0,230787054 | 0,605702091 |
| SELK      | -0,494639813 | 5,710407093 | 0,230972604 | 0,605702091 |
| PPP4R2    | 0,571098145  | 7,04011519  | 0,230998039 | 0,605702091 |
| CCDC47    | 0,593059546  | 6,583183474 | 0,231070076 | 0,605702091 |
| RBMX      | 0,636718447  | 7,33219856  | 0,23110627  | 0,605702091 |
| JAK3      | 0,745356222  | 5,494597194 | 0,231124335 | 0,605702091 |
| PDS5A     | 0,609552544  | 7,798942591 | 0,231718985 | 0,606815344 |
| DNAJA4    | 0,78643215   | 5,87847867  | 0,231756678 | 0,606815344 |
| LSP1      | -0,558821533 | 7,02929824  | 0,231816098 | 0,606815344 |
| DHRS4     | -0,574775301 | 5,003731057 | 0,232067576 | 0,607240522 |
| SH3YL1    | -0,645273706 | 6,060838463 | 0,232299592 | 0,607614468 |
| C1S       | -0,582752752 | 8,289526717 | 0,232467981 | 0,607821764 |
| CCM2      | 0,676115706  | 6,64766591  | 0,232649546 | 0,60806334  |
| ZC3H4     | -0,500058576 | 5,03541714  | 0,232749188 | 0,608090695 |
| LMNB2     | 0,925211326  | 5,458950018 | 0,232855258 | 0,608134815 |
| WDR45L    | 0,586707132  | 6,041247293 | 0,232999265 | 0,608277943 |
| TSN       | 0,629128279  | 6,872417304 | 0,233426594 | 0,609016751 |
| ILK       | -0,497542415 | 7,69270171  | 0,233528383 | 0,609016751 |
| OLFML2A   | -0,609037931 | 5,088559849 | 0,233550199 | 0,609016751 |
| MICALL1   | 0,598337159  | 6,832877767 | 0,233754073 | 0,6091303   |
| HNRNPA1L2 | 0,73817454   | 4,281784763 | 0,2337724   | 0,6091303   |
| SLC4A7    | 0,769843465  | 5,526622577 | 0,23395604  | 0,609375949 |
| BCL10     | 1,065152946  | 6,097989965 | 0,234395434 | 0,610275273 |
| PIGK      | 0,604099305  | 5,653923687 | 0,234573342 | 0,610275273 |
| GAL3ST4   | -0,645463076 | 4,340838489 | 0,234580172 | 0,610275273 |
| DSN1      | 0,57795794   | 5,754415639 | 0,2346593   | 0,610275273 |
| TMEM98    | -0,690235443 | 7,005145831 | 0,234766578 | 0,610321499 |
| USP25     | -0,486438903 | 6,729711215 | 0,235369385 | 0,610829768 |
| BLMH      | 0,710891946  | 5,045576349 | 0,235419517 | 0,610829768 |
| GALNT6    | 1,091410957  | 4,340703424 | 0,235431002 | 0,610829768 |
| TRIM44    | 0,698074945  | 7,976406788 | 0,23554253  | 0,610829768 |
| VDAC2     | 0,687487157  | 7,746011949 | 0,235659555 | 0,610829768 |
| PGAP3     | -0,558199882 | 6,081185901 | 0,235722788 | 0,610829768 |
| HIPK3     | -0,495375807 | 6,942497189 | 0,235743629 | 0,610829768 |
| TMC6      | -0,535045392 | 4,668205824 | 0,235840694 | 0,610829768 |
| DICER1    | -0,659273473 | 5,088616592 | 0,23589805  | 0,610829768 |
| TLR4      | -0,642425065 | 5,864607569 | 0,2359419   | 0,610829768 |
| RGPD8     | 0,512754251  | 4,613147553 | 0,235947442 | 0,610829768 |
| XRN2      | -0,612459607 | 4,353871762 | 0,236307811 | 0,611159838 |
| C17orf89  | 0,688127512  | 6,261508202 | 0,236353013 | 0,611159838 |
| ZMYM6     | -0,502051157 | 5,280526569 | 0,23638124  | 0,611159838 |
| NUDT19    | 0,603405431  | 4,947498598 | 0,236509947 | 0,611159838 |
| PTGIS     | -0,65637725  | 5,177032927 | 0,23652307  | 0,611159838 |
| ECSIT     | 0,687914951  | 5,002231626 | 0,236742276 | 0,611494539 |
| HIP1R     | -0,557386402 | 5,36714384  | 0,237042054 | 0,611637128 |
| NUP188    | 0,541040276  | 6,316090185 | 0,2371202   | 0,611637128 |
| RTTN      | 0,679277227  | 4,273182888 | 0,237122896 | 0,611637128 |

|          |              |             |             |             |
|----------|--------------|-------------|-------------|-------------|
| CD9      | -0,702587995 | 8,934374774 | 0,237156264 | 0,611637128 |
| HAUS2    | 0,676159747  | 5,337728558 | 0,237616575 | 0,612196084 |
| ZDHHC24  | -0,531611114 | 5,500801806 | 0,237764472 | 0,612196084 |
| PPP2R2D  | -0,58400319  | 3,687592252 | 0,237834311 | 0,612196084 |
| FAS      | -0,538453088 | 4,920466349 | 0,237938098 | 0,612196084 |
| MAMDC4   | 0,807779733  | 3,368833042 | 0,237956769 | 0,612196084 |
| SMAP2    | -0,485723224 | 5,535682639 | 0,237984186 | 0,612196084 |
| ARHGEF1  | -0,573724999 | 4,045289673 | 0,238073756 | 0,612196084 |
| EXOC4    | 0,581744419  | 5,166624041 | 0,238125785 | 0,612196084 |
| ZNF337   | 0,826582005  | 5,533483089 | 0,238180996 | 0,612196084 |
| JUP      | -0,676542984 | 7,622271117 | 0,238297594 | 0,612264995 |
| BBS5     | -0,589124396 | 3,079911077 | 0,238531446 | 0,612558124 |
| SAP30L   | -0,567493461 | 5,43463114  | 0,23861442  | 0,612558124 |
| ENPP4    | -0,732120316 | 5,652418929 | 0,238681176 | 0,612558124 |
| MATR3    | 0,56051997   | 8,494054484 | 0,238837476 | 0,612728649 |
| ZFYVE16  | -0,5710303   | 5,819470542 | 0,238927674 | 0,612729525 |
| MRPL15   | 0,677046855  | 5,62270569  | 0,23940565  | 0,613724485 |
| R3HDM2   | -0,469514209 | 4,889850813 | 0,240205262 | 0,615125258 |
| UBE2E3   | 0,697290564  | 5,66718052  | 0,240219568 | 0,615125258 |
| WDFY3    | -0,486106147 | 5,104120184 | 0,240222696 | 0,615125258 |
| RPE      | 0,68574489   | 5,710095104 | 0,240403137 | 0,615181021 |
| HDAC1    | 0,574410308  | 7,692738816 | 0,240435945 | 0,615181021 |
| SNAPC1   | 0,53645233   | 4,620867233 | 0,240558853 | 0,615181021 |
| THAP6    | 0,733659043  | 4,562790334 | 0,240605336 | 0,615181021 |
| FMOD     | -0,747970984 | 5,802884228 | 0,241040619 | 0,615829583 |
| SHISA5   | -0,429372259 | 8,922634208 | 0,241171413 | 0,615829583 |
| ASNSD1   | 0,713688054  | 5,718164237 | 0,241211847 | 0,615829583 |
| RABGAP1L | -0,569112727 | 5,774493852 | 0,24122024  | 0,615829583 |
| RPL28    | -0,539154642 | 10,7053141  | 0,24153877  | 0,616118553 |
| IPO13    | 0,769324433  | 7,445583508 | 0,241550605 | 0,616118553 |
| KBTBD7   | 0,693895924  | 4,115114264 | 0,241688421 | 0,616118553 |
| HIST1H1C | -0,588270994 | 5,561565389 | 0,241694842 | 0,616118553 |
| GLYR1    | -0,504808945 | 5,744914429 | 0,241796483 | 0,616147315 |
| ANXA2P2  | 0,79844246   | 5,043006261 | 0,242029634 | 0,616511048 |
| PCBP1    | -0,478472637 | 8,587236747 | 0,242141969 | 0,616566873 |
| SMARCAL1 | -0,489827669 | 4,158410718 | 0,242335831 | 0,616625684 |
| PEBP1    | -0,542651489 | 6,689668845 | 0,242400283 | 0,616625684 |
| SKIL     | 0,601340934  | 7,331931178 | 0,242436348 | 0,616625684 |
| TBCE     | 0,698907123  | 5,07048878  | 0,242781106 | 0,616962296 |
| SEL1L3   | -0,608124345 | 5,469496775 | 0,242793866 | 0,616962296 |
| LYSMD1   | 0,982339845  | 5,147836766 | 0,2428626   | 0,616962296 |
| PREP     | -0,479208125 | 5,758708086 | 0,242930601 | 0,616962296 |
| CPSF1    | 1,018019511  | 5,872831233 | 0,243111083 | 0,617091226 |
| ANKRD36  | -0,61590296  | 6,879448897 | 0,243238256 | 0,617091226 |
| EPRS     | 0,570085373  | 6,922232453 | 0,243252855 | 0,617091226 |
| TMEM127  | -0,460528357 | 7,685199114 | 0,243461301 | 0,617193606 |
| SSB      | 0,888147483  | 7,060247544 | 0,243474234 | 0,617193606 |
| HDAC10   | -0,581985408 | 4,865483641 | 0,243658478 | 0,617431126 |
| PI4KB    | 0,571196747  | 6,183844683 | 0,24406481  | 0,618075777 |
| ZNF280C  | 0,824363341  | 4,814610108 | 0,244174456 | 0,618075777 |

|          |              |             |             |             |
|----------|--------------|-------------|-------------|-------------|
| BSG      | -0,474741655 | 8,295368234 | 0,244184799 | 0,618075777 |
| IGFBP5   | 1,42185289   | 10,50333057 | 0,244618971 | 0,618875784 |
| AGPS     | -0,586050569 | 5,437900357 | 0,244729743 | 0,618875784 |
| CDC42EP3 | -0,591159401 | 6,944560016 | 0,244773132 | 0,618875784 |
| BPGM     | 0,553459508  | 4,983330512 | 0,245001593 | 0,619223818 |
| CNOT6L   | -0,525927865 | 6,440914003 | 0,245444506 | 0,620068525 |
| FKBP8    | -0,762362318 | 6,105762344 | 0,245517674 | 0,620068525 |
| CD63     | -0,490490598 | 9,198423038 | 0,24601738  | 0,621100523 |
| TUG1     | 0,68907684   | 7,919513096 | 0,246155544 | 0,62121934  |
| PRPF19   | 0,678454575  | 7,849258747 | 0,246366675 | 0,621522145 |
| DIDO1    | -0,495256174 | 4,818025648 | 0,246543012 | 0,621588351 |
| LIMA1    | -0,452925895 | 6,809719299 | 0,24657523  | 0,621588351 |
| SEC16A   | 0,57209169   | 7,661948623 | 0,246725224 | 0,621722696 |
| USP4     | -0,490451841 | 5,21092556  | 0,246810872 | 0,621722696 |
| POLR1E   | 0,581971866  | 5,683845829 | 0,247067191 | 0,622138545 |
| SAFB     | 0,513321906  | 5,841600319 | 0,247225981 | 0,622308587 |
| C11orf83 | 0,837768295  | 4,455351528 | 0,247952273 | 0,623906477 |
| PSMD13   | 0,553505835  | 4,963814405 | 0,24806373  | 0,623956687 |
| AMMECR1L | -0,469887312 | 5,583122869 | 0,24820128  | 0,624072466 |
| SHC1     | 0,580171237  | 8,779032228 | 0,248305127 | 0,62410345  |
| USP28    | 0,570296501  | 5,539190753 | 0,248615453 | 0,624184453 |
| LRRC58   | 0,534699432  | 6,117782554 | 0,24872994  | 0,624184453 |
| THOC5    | 0,631419912  | 6,224685911 | 0,24888614  | 0,624184453 |
| SEH1L    | 0,574649689  | 5,217808712 | 0,249142285 | 0,624184453 |
| INTS8    | 0,683216458  | 6,752420402 | 0,249196461 | 0,624184453 |
| HADHA    | -0,408590238 | 7,036534728 | 0,249412815 | 0,624184453 |
| TRIM22   | -0,643710229 | 6,647812902 | 0,249538313 | 0,624184453 |
| SMEK2    | 0,545561772  | 7,016201848 | 0,249566428 | 0,624184453 |
| NPLOC4   | 0,603413022  | 7,691327365 | 0,249584278 | 0,624184453 |
| PPA2     | -0,537155581 | 5,202697725 | 0,249606905 | 0,624184453 |
| S100A13  | -0,491339589 | 5,027512004 | 0,24977235  | 0,624184453 |
| FTL      | -0,516400719 | 11,87165802 | 0,249876776 | 0,624184453 |
| PPOX     | 0,628644203  | 4,117476239 | 0,249901603 | 0,624184453 |
| ERF      | -0,465629643 | 5,593988311 | 0,249944059 | 0,624184453 |
| FXR2     | -0,545613178 | 6,052540445 | 0,250000656 | 0,624184453 |
| BRD9     | 0,644257498  | 6,35128352  | 0,250162211 | 0,624184453 |
| HNRNPH3  | 0,624913357  | 6,661879124 | 0,250174363 | 0,624184453 |
| SNX9     | -0,538241128 | 3,897046731 | 0,250177208 | 0,624184453 |
| ZUFSP    | 0,825568366  | 4,165275937 | 0,250228084 | 0,624184453 |
| LRIG3    | 0,827875748  | 5,750276238 | 0,250230381 | 0,624184453 |
| PSMA4    | 0,690313952  | 6,903769151 | 0,250259612 | 0,624184453 |
| LRP10    | -0,506226494 | 6,989942008 | 0,250588328 | 0,624511014 |
| MRPL10   | 0,681541077  | 5,553334291 | 0,250606602 | 0,624511014 |
| SERINC3  | -0,461967519 | 6,241845736 | 0,250665295 | 0,624511014 |
| MDFI     | 1,170848299  | 6,250045805 | 0,250911166 | 0,624895268 |
| XRCC5    | 0,508727499  | 9,430665576 | 0,251418076 | 0,625929121 |
| RHOBTB1  | -0,578829715 | 4,457078409 | 0,251766109 | 0,626468524 |
| PDF      | 0,812495178  | 3,94494283  | 0,251925024 | 0,626468524 |
| HNRNPD   | 0,552792032  | 6,83262314  | 0,252063551 | 0,626468524 |
| MTX3     | -0,557049616 | 5,191920866 | 0,252117125 | 0,626468524 |



|              |              |             |             |             |
|--------------|--------------|-------------|-------------|-------------|
| HIST1H2BK    | 0,637327247  | 6,925892756 | 0,252255787 | 0,626468524 |
| TOR1A        | -0,530852797 | 3,977810658 | 0,252310473 | 0,626468524 |
| MLXIP        | -0,474683017 | 5,345473529 | 0,25239989  | 0,626468524 |
| SEC14L1      | -0,48560102  | 8,326792112 | 0,252513428 | 0,626468524 |
| CISD2        | 0,603411369  | 7,259677908 | 0,252542803 | 0,626468524 |
| GCN1L1       | 0,578766256  | 6,078232261 | 0,25255345  | 0,626468524 |
| SERPINF1     | -0,552385744 | 7,665046228 | 0,252774548 | 0,62678896  |
| SPIRE1       | -0,482286927 | 4,77050603  | 0,252936962 | 0,626963702 |
| PRDX2        | 0,67795313   | 7,640435429 | 0,253283282 | 0,627594005 |
| ATF7         | -0,464681704 | 7,616364888 | 0,253458866 | 0,627753757 |
| MSC          | 1,438751128  | 5,688865455 | 0,253568806 | 0,627753757 |
| CDC16        | 0,571571697  | 5,793644016 | 0,253767497 | 0,627753757 |
| LRMP         | 0,664739422  | 4,527530939 | 0,253809134 | 0,627753757 |
| HABP4        | 0,793808332  | 4,442094106 | 0,253854358 | 0,627753757 |
| SMAD3        | 0,618472614  | 7,73336717  | 0,253900112 | 0,627753757 |
| SUPT5H       | 0,916304139  | 7,972024072 | 0,254138016 | 0,628114219 |
| SMUG1        | 0,592484628  | 5,147902719 | 0,254698329 | 0,629270979 |
| WIPI1        | -0,522393944 | 6,045562614 | 0,254847208 | 0,62941076  |
| ORAOV1       | 0,721747506  | 4,46903616  | 0,25502682  | 0,629482699 |
| AHCY         | 0,706686447  | 6,740792877 | 0,25507417  | 0,629482699 |
| LOC100129034 | -0,52422621  | 6,962426045 | 0,25517032  | 0,629482699 |
| H3F3B        | -0,436659469 | 10,94363232 | 0,255263869 | 0,629482699 |
| SLC26A6      | 0,704790701  | 4,55362809  | 0,255337901 | 0,629482699 |
| TRMT5        | 0,550674156  | 4,243140054 | 0,255601134 | 0,62970463  |
| DNAJC14      | 0,54076566   | 5,378673654 | 0,255612614 | 0,62970463  |
| TRERF1       | 0,700326923  | 5,599636698 | 0,255968168 | 0,630213468 |
| CCL4         | -0,66589233  | 6,573721167 | 0,256229983 | 0,630213468 |
| AQR          | -0,45591035  | 4,844574233 | 0,256466895 | 0,630213468 |
| RCAN3        | 0,59998061   | 5,602401552 | 0,256472898 | 0,630213468 |
| DNM1L        | 0,61472023   | 7,333128582 | 0,256574226 | 0,630213468 |
| TOMM22       | 0,50952342   | 7,128259652 | 0,256654985 | 0,630213468 |
| PRKRIP1      | 0,700032859  | 4,520774264 | 0,256909472 | 0,630213468 |
| HIST1H4H     | 0,696089962  | 9,241496124 | 0,256947646 | 0,630213468 |
| GPSM2        | 0,659237934  | 4,942834774 | 0,257046621 | 0,630213468 |
| SF1          | -0,714280427 | 6,068096481 | 0,257129119 | 0,630213468 |
| B3GALNT1     | -0,622332175 | 5,094577139 | 0,257274114 | 0,630213468 |
| MAGEH1       | -0,502920786 | 5,800040005 | 0,257472597 | 0,630213468 |
| IFNGR2       | 0,678030616  | 7,4190404   | 0,257637871 | 0,630213468 |
| DLD          | 0,661446409  | 6,631572136 | 0,257650543 | 0,630213468 |
| PLCD1        | -0,60781828  | 5,356277886 | 0,257698496 | 0,630213468 |
| TNPO1        | 0,533234106  | 5,647865128 | 0,257849348 | 0,630213468 |
| KCTD1        | 0,799832412  | 4,938628486 | 0,257858279 | 0,630213468 |
| SLC30A1      | 0,54612025   | 6,073357676 | 0,257859631 | 0,630213468 |
| MRPS2        | 0,593919013  | 6,647113457 | 0,257989994 | 0,630213468 |
| OXSRI        | 0,614131439  | 5,195411938 | 0,257993853 | 0,630213468 |
| PLEKHB2      | -0,498140542 | 6,002341057 | 0,258032747 | 0,630213468 |
| TDP1         | 0,641053575  | 4,180121381 | 0,258146082 | 0,630213468 |
| BZW2         | 0,634925761  | 6,113685042 | 0,258265339 | 0,630213468 |
| FAM86A       | 0,640517116  | 3,939375016 | 0,258430011 | 0,630213468 |
| ZNF776       | -0,48226273  | 3,471714375 | 0,258712182 | 0,630213468 |

|           |              |             |             |             |
|-----------|--------------|-------------|-------------|-------------|
| PI4KAP2   | 1,46203468   | 8,839885594 | 0,258760085 | 0,630213468 |
| PRPF6     | -0,475156121 | 4,805481637 | 0,258781749 | 0,630213468 |
| LOC282997 | 0,708088659  | 4,487446873 | 0,25879935  | 0,630213468 |
| ATP6V1G1  | -0,546277559 | 7,224445083 | 0,258894046 | 0,630213468 |
| HSP90AA1  | 0,679682174  | 9,141688526 | 0,258997046 | 0,630213468 |
| CMTM7     | -0,550593256 | 6,346204072 | 0,259028401 | 0,630213468 |
| CSDA      | 0,64340723   | 8,280695239 | 0,259055856 | 0,630213468 |
| RNF41     | -0,49397496  | 5,126340326 | 0,259173164 | 0,630213468 |
| WIPI2     | 0,585098014  | 6,888866435 | 0,259199124 | 0,630213468 |
| GTF2H2    | -0,495096256 | 5,013552968 | 0,259303339 | 0,630213468 |
| AHSA1     | 0,7086705    | 6,122034591 | 0,259385168 | 0,630213468 |
| NFXL1     | 0,55791301   | 4,440575293 | 0,259531554 | 0,630213468 |
| WDR34     | 0,548302012  | 5,557615232 | 0,25956187  | 0,630213468 |
| SYMPK     | 0,623050691  | 7,183703133 | 0,259622152 | 0,630213468 |
| RANBP10   | -0,59696573  | 4,51177387  | 0,259754189 | 0,630213468 |
| EPC2      | 0,694868298  | 6,056606947 | 0,259812441 | 0,630213468 |
| RPL21     | 0,653702562  | 11,92145745 | 0,259831177 | 0,630213468 |
| ITGA5     | 0,728360671  | 8,229628115 | 0,259832659 | 0,630213468 |
| MFAP2     | 1,060401515  | 6,704491048 | 0,259885654 | 0,630213468 |
| SRPRB     | 0,590209126  | 5,375103487 | 0,260334238 | 0,630784581 |
| CNOT4     | -0,457007986 | 5,510675453 | 0,260368478 | 0,630784581 |
| RPRD1B    | -0,41368731  | 5,537316334 | 0,26039868  | 0,630784581 |
| UBE2N     | 0,528259634  | 7,097607238 | 0,26052755  | 0,630872643 |
| FKBP5     | 0,8355317    | 6,932259807 | 0,260666082 | 0,630984031 |
| AAAS      | -0,525874211 | 4,716274638 | 0,260808593 | 0,630988    |
| CLCN3     | 0,840906812  | 4,135656763 | 0,26085279  | 0,630988    |
| SLC25A32  | 0,543287335  | 6,077590211 | 0,261107625 | 0,631020981 |
| TBCC      | -0,468191626 | 5,059933143 | 0,261220294 | 0,631020981 |
| TIMP2     | -0,517620885 | 8,968894747 | 0,261378774 | 0,631020981 |
| SLC39A14  | 0,763986133  | 5,205051136 | 0,261500322 | 0,631020981 |
| TJAP1     | 0,688888523  | 5,682093623 | 0,261539282 | 0,631020981 |
| AMMECR1   | 0,627017854  | 4,534183232 | 0,261598486 | 0,631020981 |
| QTRT1     | 0,731418849  | 5,942161469 | 0,261653873 | 0,631020981 |
| DAB2      | -0,558566102 | 7,733109191 | 0,261670304 | 0,631020981 |
| BANF1     | 0,525308897  | 4,41047718  | 0,261699272 | 0,631020981 |
| ILF3      | 0,799634806  | 7,593342772 | 0,262009135 | 0,631544818 |
| ADRBK1    | -0,439981799 | 6,627088205 | 0,262278214 | 0,631970014 |
| MEIS1     | -0,727832362 | 5,632020509 | 0,26274464  | 0,632784956 |
| MLLT3     | -0,420991867 | 4,50048326  | 0,262802023 | 0,632784956 |
| COMMD2    | -0,538623317 | 3,659735934 | 0,26294805  | 0,63291308  |
| ALG13     | -0,568764005 | 6,514737217 | 0,263408097 | 0,633501312 |
| ENTPD4    | -0,466113813 | 5,386800247 | 0,263417762 | 0,633501312 |
| ST3GAL1   | -0,542717971 | 4,758428305 | 0,263498693 | 0,633501312 |
| CRTC1     | 0,842006319  | 5,943583716 | 0,263580223 | 0,633501312 |
| DENND5A   | -0,499910713 | 5,05625449  | 0,26377528  | 0,633501312 |
| SNRPD2    | 0,63313223   | 7,22125973  | 0,263930478 | 0,633501312 |
| GORAB     | 0,744936187  | 5,647570276 | 0,263949344 | 0,633501312 |
| TATDN1    | -0,478474214 | 6,558456356 | 0,263988639 | 0,633501312 |
| UBE2J1    | -0,437830597 | 7,110882794 | 0,264107921 | 0,633501312 |
| HIST1H2AC | -0,682234951 | 4,66397962  | 0,264121459 | 0,633501312 |

|           |              |             |             |             |
|-----------|--------------|-------------|-------------|-------------|
| NLRP1     | -0,717529242 | 6,102347595 | 0,264299527 | 0,633705511 |
| PDCD2     | 0,709207956  | 5,68715735  | 0,264634268 | 0,633904341 |
| KIAA0513  | -0,613676306 | 4,557729604 | 0,264667884 | 0,633904341 |
| PFDN5     | 0,586884257  | 9,145703899 | 0,26471353  | 0,633904341 |
| PSMD10    | 0,840873827  | 5,789481682 | 0,264754299 | 0,633904341 |
| YARS      | 0,620054676  | 6,132461683 | 0,265272954 | 0,634923227 |
| TTC30B    | -0,489677161 | 3,728894365 | 0,26571626  | 0,635559792 |
| ANKRD9    | 0,610283303  | 4,306927138 | 0,265725322 | 0,635559792 |
| GPSM3     | -0,498952781 | 5,730525153 | 0,265907886 | 0,635773448 |
| TRAF3     | 0,562675566  | 6,804697731 | 0,266141532 | 0,636109044 |
| COPB1     | 0,708027808  | 7,706409065 | 0,266247676 | 0,636139769 |
| SUMO1P3   | 0,680870219  | 8,366623592 | 0,266468307 | 0,636224137 |
| ZFP64     | 0,654934666  | 5,718088316 | 0,26646959  | 0,636224137 |
| TAF1B     | 0,612548122  | 5,735113194 | 0,266608516 | 0,636333032 |
| TTF2      | 0,635666362  | 4,773254166 | 0,266742543 | 0,636430161 |
| EMD       | -0,544635382 | 5,889915444 | 0,266927507 | 0,636648713 |
| DDX11     | 0,818263757  | 4,232742274 | 0,267058238 | 0,636737806 |
| CXorf56   | 0,503300743  | 4,922780366 | 0,267216002 | 0,636891267 |
| TLE4      | -0,552221762 | 5,570948027 | 0,267574153 | 0,637522065 |
| DDX3X     | -0,45635139  | 7,546326615 | 0,268054844 | 0,637767869 |
| DPM1      | 0,563712641  | 7,439169449 | 0,268278012 | 0,637767869 |
| RANBP6    | 0,547916739  | 5,299492327 | 0,26829381  | 0,637767869 |
| CAPZA2    | 1,065254717  | 7,50751827  | 0,268296945 | 0,637767869 |
| POLR3D    | 0,616388379  | 6,085493859 | 0,26831998  | 0,637767869 |
| C20orf194 | -0,608555695 | 5,314850735 | 0,268325631 | 0,637767869 |
| MCL1      | -0,475317516 | 8,231248041 | 0,268332016 | 0,637767869 |
| TADA2B    | 0,597541923  | 6,035786728 | 0,268539106 | 0,637816708 |
| MAPRE1    | 0,516052335  | 7,448530944 | 0,268539635 | 0,637816708 |
| SNTA1     | 0,753094213  | 5,354341198 | 0,269468641 | 0,639723942 |
| PIGG      | -0,429953444 | 5,568904472 | 0,269615402 | 0,639723942 |
| SQLE      | 0,870547952  | 4,681138335 | 0,269641491 | 0,639723942 |
| QSER1     | 0,535035652  | 6,160698836 | 0,269798005 | 0,639723942 |
| MYO1D     | -0,562166212 | 6,996099379 | 0,26985907  | 0,639723942 |
| USP3      | 0,503191336  | 5,929952633 | 0,269973123 | 0,639723942 |
| YIPF6     | 0,538458645  | 6,405718788 | 0,270003096 | 0,639723942 |
| GNAI1     | -0,626491525 | 5,672585088 | 0,270093156 | 0,639723942 |
| ACTR3     | 0,713603267  | 7,448590588 | 0,270359819 | 0,639835355 |
| PELO      | -0,518085099 | 6,127705879 | 0,270374666 | 0,639835355 |
| ARL2BP    | 0,552328655  | 7,249437512 | 0,270700286 | 0,639835355 |
| REXO4     | 0,661943365  | 4,499716957 | 0,270826902 | 0,639835355 |
| ATG9A     | -0,501305725 | 5,283325783 | 0,270843029 | 0,639835355 |
| CHRAC1    | 0,56131949   | 6,346323211 | 0,270899292 | 0,639835355 |
| DNAJC25   | 0,665136121  | 4,227895691 | 0,2709769   | 0,639835355 |
| TMEM205   | -0,551971092 | 6,224476394 | 0,271002513 | 0,639835355 |
| PTPN11    | 0,589178624  | 6,87820589  | 0,271027634 | 0,639835355 |
| RTN4      | 0,648552135  | 9,017261839 | 0,271078507 | 0,639835355 |
| MIOS      | 0,541619658  | 5,360569345 | 0,271327705 | 0,640201944 |
| EFHA1     | 0,678301145  | 5,696629443 | 0,271474801 | 0,640302451 |
| MRPS10    | 0,717598547  | 5,930963149 | 0,271615631 | 0,640302451 |
| TMEM209   | 0,564157355  | 5,64628623  | 0,271793963 | 0,640302451 |

|              |              |             |             |             |
|--------------|--------------|-------------|-------------|-------------|
| NPRL3        | -0,41855292  | 5,639803368 | 0,271833064 | 0,640302451 |
| ZNF595       | 0,885526754  | 5,212178225 | 0,271931663 | 0,640302451 |
| FUBP1        | 0,743709938  | 6,782038528 | 0,2719337   | 0,640302451 |
| SLC39A9      | -0,441538039 | 4,600823775 | 0,272400279 | 0,641179669 |
| MSL1         | 0,493948249  | 6,520990633 | 0,272524374 | 0,641244628 |
| TXNDC17      | 0,769775493  | 6,179185326 | 0,272615952 | 0,641244628 |
| CCDC159      | -0,626000134 | 5,445853244 | 0,273076409 | 0,642106218 |
| LENG9        | -0,485648601 | 8,295713468 | 0,273420652 | 0,642597206 |
| ABTB1        | -0,556062084 | 6,120208733 | 0,27347369  | 0,642597206 |
| PHF6         | 0,649626283  | 6,675872972 | 0,273765508 | 0,643061315 |
| KIAA0664     | 0,653788305  | 5,513505985 | 0,273862434 | 0,643067472 |
| C22orf13     | -0,50712768  | 6,648432192 | 0,274467745 | 0,644129618 |
| ZNF197       | 0,682589005  | 4,586629828 | 0,274503691 | 0,644129618 |
| MIB1         | 0,595506786  | 6,676365625 | 0,274786051 | 0,644309773 |
| CIZ1         | 0,50859547   | 6,515031144 | 0,274843545 | 0,644309773 |
| UBE2R2       | 0,5041992    | 7,11432057  | 0,27494358  | 0,644309773 |
| DOCK1        | -0,495514647 | 5,754013761 | 0,275077457 | 0,644309773 |
| LOC100288778 | 0,958971674  | 5,057090787 | 0,275208208 | 0,644309773 |
| VAMP7        | 0,659875555  | 5,367724904 | 0,27521367  | 0,644309773 |
| DAZAP1       | 0,527294811  | 8,17283242  | 0,275241878 | 0,644309773 |
| ADAR         | 0,537961103  | 8,380129029 | 0,275961595 | 0,64577286  |
| LOC100216545 | -0,557110215 | 5,661392252 | 0,276293092 | 0,646326792 |
| CUL4A        | 1,092144242  | 7,192204311 | 0,276615346 | 0,646697537 |
| JMJD8        | -0,494475044 | 6,820509809 | 0,276641255 | 0,646697537 |
| KLHDC3       | 0,783818102  | 8,570765702 | 0,277116675 | 0,647424134 |
| SESTD1       | -0,549428165 | 4,551899277 | 0,277141963 | 0,647424134 |
| RNH1         | -0,448345637 | 7,214800486 | 0,277530976 | 0,648110864 |
| VPS41        | 0,452102177  | 5,942612955 | 0,277705886 | 0,648129197 |
| LOC727896    | -0,634785024 | 4,285365254 | 0,277728921 | 0,648129197 |
| PKP4         | 0,640309262  | 5,392565941 | 0,277884006 | 0,648269258 |
| NDUFAB3      | -0,442867806 | 6,699464004 | 0,278029017 | 0,648385727 |
| GSR          | 0,714113635  | 7,581894984 | 0,278386239 | 0,648996842 |
| ZNF207       | -0,457965221 | 7,550821239 | 0,27864892  | 0,649362989 |
| ZMYND8       | -0,479979162 | 4,811746702 | 0,278763759 | 0,649362989 |
| CXorf40B     | 0,515959144  | 4,728773231 | 0,278828983 | 0,649362989 |
| C9orf114     | 0,601976642  | 5,37436102  | 0,279016717 | 0,649578352 |
| PUF60        | 0,636639292  | 5,804515884 | 0,279283047 | 0,649731238 |
| PTPN1        | -0,424565277 | 6,377477298 | 0,279368009 | 0,649731238 |
| CSAD         | 1,080747526  | 5,252443355 | 0,279589966 | 0,649731238 |
| CBR1         | 0,616640007  | 5,344528645 | 0,279596633 | 0,649731238 |
| ATG10        | 0,592702941  | 4,0463476   | 0,279644505 | 0,649731238 |
| PIGC         | 0,590975439  | 5,618169921 | 0,279654082 | 0,649731238 |
| VPS13A       | -0,45527435  | 4,857538971 | 0,280070876 | 0,65032842  |
| ATP13A3      | 0,551770473  | 6,161617465 | 0,280120596 | 0,65032842  |
| NFYA         | 0,817030568  | 6,387299765 | 0,280321301 | 0,65032842  |
| ZC3H7A       | -0,500202119 | 5,948255014 | 0,280452917 | 0,65032842  |
| ACOT2        | -0,53309626  | 4,792181314 | 0,28048338  | 0,65032842  |
| RSL1D1       | 0,620503762  | 7,188518242 | 0,280606598 | 0,65032842  |
| DSTN         | -0,457613637 | 10,2766689  | 0,280648614 | 0,65032842  |
| REEP5        | -0,470927381 | 7,791811366 | 0,28069176  | 0,65032842  |

|           |              |             |             |             |
|-----------|--------------|-------------|-------------|-------------|
| TNFAIP1   | -0,537801728 | 6,808718966 | 0,280864818 | 0,65032842  |
| RPS3A     | 0,60525584   | 11,16571241 | 0,280956328 | 0,65032842  |
| GCFC1     | 0,660823544  | 5,120607385 | 0,280960189 | 0,65032842  |
| SLC39A7   | 0,606600976  | 8,094751337 | 0,281411963 | 0,651153096 |
| GPATCH2   | -0,575751736 | 5,577296263 | 0,281592775 | 0,651350451 |
| POMP      | 0,672114663  | 4,799445688 | 0,281876126 | 0,651470215 |
| YES1      | 0,570905717  | 6,623674949 | 0,281891068 | 0,651470215 |
| TMEM208   | 0,57203288   | 6,2434363   | 0,281931164 | 0,651470215 |
| ZNF526    | 0,697682246  | 5,494407819 | 0,282160859 | 0,65159629  |
| KCTD12    | -0,56642792  | 8,617316011 | 0,282182535 | 0,65159629  |
| COTL1     | -0,501098147 | 7,620367151 | 0,282357187 | 0,65159629  |
| RNF11     | -0,492172935 | 7,505025116 | 0,282425321 | 0,65159629  |
| CD14      | -0,520659412 | 7,912029894 | 0,282463504 | 0,65159629  |
| STARD3NL  | 0,52892321   | 5,9133419   | 0,282852444 | 0,652156046 |
| ISOC2     | 0,570125409  | 6,227499646 | 0,282973242 | 0,652156046 |
| SHROOM1   | -0,52548109  | 5,455613613 | 0,28299307  | 0,652156046 |
| CASK      | 0,63485075   | 7,954678092 | 0,283477461 | 0,652941047 |
| COX10     | 0,554882108  | 6,146815211 | 0,283525215 | 0,652941047 |
| AIM1      | 1,124179601  | 6,328141736 | 0,283760207 | 0,653261598 |
| SMS       | 0,542762531  | 6,694426142 | 0,284160116 | 0,653592247 |
| ATP5E     | 0,633232611  | 9,422459431 | 0,284189024 | 0,653592247 |
| ATXN1L    | -0,452100424 | 5,985882838 | 0,284191379 | 0,653592247 |
| THYN1     | -0,472870657 | 5,008495579 | 0,284621423 | 0,654296314 |
| IMPA2     | -0,583982746 | 5,784517132 | 0,284689421 | 0,654296314 |
| FERMT2    | -0,612746821 | 6,256537984 | 0,285007192 | 0,654805945 |
| FYN       | -0,583537149 | 4,920488813 | 0,285116148 | 0,65483564  |
| MTF1      | -0,484033993 | 4,050173548 | 0,28548898  | 0,655303436 |
| GZF1      | 0,627783314  | 4,653203825 | 0,285512026 | 0,655303436 |
| ASNA1     | 0,633741961  | 7,223721998 | 0,285770807 | 0,655368606 |
| GUSBP3    | -0,525762348 | 5,331285004 | 0,285786535 | 0,655368606 |
| ERBB2     | -0,533907776 | 4,787582374 | 0,285828748 | 0,655368606 |
| PLCB3     | 0,553343305  | 4,842086869 | 0,285974065 | 0,655481396 |
| LEF1      | 0,695412161  | 4,896540792 | 0,286320189 | 0,655878278 |
| NUP214    | -0,430276337 | 6,041015164 | 0,286339585 | 0,655878278 |
| LOC440173 | 1,206940895  | 5,80768321  | 0,286712266 | 0,656511398 |
| MTFMT     | 0,480112741  | 4,740749294 | 0,2870189   | 0,656992909 |
| PARP8     | -0,578322766 | 5,755019888 | 0,287313564 | 0,65744671  |
| PLVAP     | -0,586995885 | 5,294968631 | 0,287486479 | 0,657501444 |
| CDC123    | 0,588161752  | 7,155542843 | 0,287530328 | 0,657501444 |
| POLR2F    | 0,465435389  | 7,058762907 | 0,287728618 | 0,65773431  |
| PRDM4     | -0,436327612 | 5,317917915 | 0,288113388 | 0,658284051 |
| RNPS1     | 0,575856318  | 7,197450595 | 0,288162178 | 0,658284051 |
| USP9X     | 0,543803092  | 6,1412599   | 0,288628525 | 0,659091196 |
| TERF2IP   | -0,424748917 | 5,042422779 | 0,288708814 | 0,659091196 |
| TFAM      | 0,739676064  | 5,819763157 | 0,288808582 | 0,6590983   |
| SRD5A1    | 0,616359519  | 4,781708031 | 0,289027045 | 0,659376187 |
| GNB2      | -0,472132167 | 8,3624723   | 0,289407127 | 0,659386629 |
| VPS72     | 0,533073844  | 5,743220352 | 0,28942003  | 0,659386629 |
| RAP1A     | 0,722598905  | 8,3477005   | 0,289422261 | 0,659386629 |
| UBD       | 1,314877088  | 6,372062167 | 0,289439053 | 0,659386629 |

|          |              |             |             |             |
|----------|--------------|-------------|-------------|-------------|
| TIGD2    | -0,522090336 | 4,102990648 | 0,289531728 | 0,659386629 |
| ELOVL1   | -0,507333614 | 5,977372868 | 0,289761442 | 0,659386629 |
| SUGT1    | 0,603888639  | 5,879305985 | 0,289776029 | 0,659386629 |
| STON1    | -0,594772771 | 5,053336966 | 0,28980521  | 0,659386629 |
| CDK17    | -0,518901213 | 6,348063472 | 0,289959769 | 0,659401971 |
| ZNF331   | -0,477298485 | 5,149044743 | 0,290059111 | 0,659401971 |
| HSPA14   | 0,707316893  | 5,309463847 | 0,290260622 | 0,659401971 |
| C9orf142 | 0,547592675  | 5,942599665 | 0,29037471  | 0,659401971 |
| PHF8     | 0,651332292  | 5,112641416 | 0,29041178  | 0,659401971 |
| NR1H2    | -0,486476036 | 4,498438542 | 0,290453581 | 0,659401971 |
| PPP1CC   | 0,737787809  | 8,433515638 | 0,290582362 | 0,659401971 |
| NLRC5    | -0,523821446 | 6,62782041  | 0,290629615 | 0,659401971 |
| MAEA     | -0,438673102 | 6,518062909 | 0,290838124 | 0,659401971 |
| DR1      | 0,801246464  | 6,078855114 | 0,29094298  | 0,659401971 |
| ECD      | -0,469313727 | 6,230021978 | 0,290948529 | 0,659401971 |
| PDE8A    | -0,453356376 | 5,851940003 | 0,290972361 | 0,659401971 |
| ANKRD13A | -0,424134672 | 6,034941271 | 0,291129273 | 0,659538376 |
| WBP2     | -0,451747276 | 5,722614607 | 0,29132341  | 0,659758995 |
| TMEM126A | 0,656041191  | 5,820149338 | 0,292278685 | 0,661488757 |
| ZMYND19  | 0,664557484  | 4,621059023 | 0,292285143 | 0,661488757 |
| SPTLC2   | -0,426961218 | 6,309370781 | 0,292378225 | 0,661488757 |
| LTV1     | 0,560731677  | 4,948300021 | 0,292475314 | 0,661488944 |
| NDUFS5   | 0,541716632  | 8,019572304 | 0,292741115 | 0,661870579 |
| HSPA6    | 0,755808389  | 5,936220899 | 0,293022063 | 0,662086254 |
| ASF1A    | 0,562604271  | 5,495349113 | 0,293030696 | 0,662086254 |
| VEGFA    | 0,622514908  | 8,053118707 | 0,293216484 | 0,662277636 |
| CEP76    | 0,618898806  | 4,461201903 | 0,293309644 | 0,662277636 |
| TSEN15   | 0,608122873  | 3,870801776 | 0,293570729 | 0,662583177 |
| SORL1    | -0,5892001   | 6,03155439  | 0,293639296 | 0,662583177 |
| SNRPD1   | 0,740939786  | 7,727727185 | 0,293975809 | 0,66312307  |
| INTS7    | 0,550082909  | 5,000152049 | 0,294200357 | 0,663355794 |
| ANKRD27  | 0,681894636  | 4,410208783 | 0,294510982 | 0,663355794 |
| ZFR      | 0,644843477  | 6,216128129 | 0,294616657 | 0,663355794 |
| C16orf72 | -0,551253712 | 4,679243116 | 0,294723507 | 0,663355794 |
| PPP2R2A  | 0,541111787  | 6,374868725 | 0,294837731 | 0,663355794 |
| SNRNP25  | 0,599974191  | 3,642442669 | 0,29484346  | 0,663355794 |
| NOC4L    | -0,515995582 | 3,855649717 | 0,294981291 | 0,663355794 |
| THOC1    | 0,721628335  | 5,978180214 | 0,295058955 | 0,663355794 |
| PDIK1L   | 1,0001905    | 3,907208337 | 0,295139475 | 0,663355794 |
| ITGB5    | -0,495285727 | 6,633233147 | 0,295235531 | 0,663355794 |
| RGL2     | -0,459826531 | 6,10186514  | 0,295374235 | 0,663355794 |
| NINJ1    | -0,518409269 | 5,607721717 | 0,295387346 | 0,663355794 |
| NPR3     | -0,575004726 | 5,039889868 | 0,295485613 | 0,663355794 |
| PSMB4    | 0,462297182  | 8,325495663 | 0,295537656 | 0,663355794 |
| RNASEK   | -0,442955085 | 7,964932357 | 0,295538188 | 0,663355794 |
| MRPL19   | 0,57290162   | 6,527612252 | 0,29596274  | 0,664088246 |
| GPS1     | 0,466724324  | 7,808011897 | 0,296059285 | 0,664088246 |
| MLL4     | 0,580649357  | 5,577715965 | 0,296307774 | 0,664427067 |
| CIB1     | -0,455285617 | 7,23411234  | 0,29671789  | 0,664606103 |
| BMPR1A   | -0,504372863 | 5,080177147 | 0,296747424 | 0,664606103 |

|          |              |             |             |             |
|----------|--------------|-------------|-------------|-------------|
| MORC2    | 0,591040379  | 6,523331004 | 0,29679656  | 0,664606103 |
| EMB      | 0,883916142  | 5,675581303 | 0,296871007 | 0,664606103 |
| UBQLN4   | 0,793514925  | 5,549947602 | 0,296959028 | 0,664606103 |
| MGC57346 | 0,789323157  | 4,707949438 | 0,297040037 | 0,664606103 |
| COL13A1  | -0,611904886 | 5,324116318 | 0,297134595 | 0,664606103 |
| ASAP2    | 0,565947812  | 6,584312632 | 0,297226002 | 0,664606103 |
| PTPN2    | 0,655350257  | 6,298656863 | 0,297397949 | 0,664606103 |
| DCLRE1B  | 0,704384858  | 5,547297495 | 0,29742391  | 0,664606103 |
| SMARCB1  | 0,515827848  | 4,698358854 | 0,297459719 | 0,664606103 |
| ZBTB2    | 0,651966317  | 4,442255716 | 0,297695121 | 0,664914192 |
| PAFAH1B1 | -0,379046596 | 5,612983749 | 0,297817267 | 0,664969202 |
| UNC119   | 0,49799685   | 5,958259487 | 0,298030588 | 0,665009013 |
| LGMN     | -0,398393019 | 7,97593018  | 0,298051241 | 0,665009013 |
| ANXA4    | -0,501667386 | 7,371516417 | 0,298134065 | 0,665009013 |
| STK16    | -0,376882409 | 5,254333331 | 0,298225189 | 0,665009013 |
| FASTKD5  | 0,540115398  | 5,692624918 | 0,29833103  | 0,665027556 |
| C18orf8  | -0,488262673 | 4,830101183 | 0,298462409 | 0,665102996 |
| GTF3C4   | 0,5160351    | 6,05577193  | 0,298787853 | 0,665337687 |
| POGZ     | -0,439049933 | 7,349839249 | 0,298844601 | 0,665337687 |
| ABHD2    | -0,576338534 | 7,014307923 | 0,298860439 | 0,665337687 |
| TMBIM4   | -0,496113721 | 7,43718904  | 0,299014716 | 0,665463886 |
| GTF2H5   | -0,479153718 | 4,714113472 | 0,299548708 | 0,666163558 |
| DCTN4    | -0,423813929 | 6,065668743 | 0,299589018 | 0,666163558 |
| ASB3     | -0,442776079 | 4,76149162  | 0,299778571 | 0,666163558 |
| GRINA    | -0,449843055 | 7,640521851 | 0,29987458  | 0,666163558 |
| MOSPD3   | -0,433414654 | 5,768669943 | 0,299909133 | 0,666163558 |
| KDM3B    | -0,382182046 | 6,234735317 | 0,299915255 | 0,666163558 |
| NAGA     | -0,496963632 | 5,275591041 | 0,300167616 | 0,666506993 |
| PDE12    | 0,563431909  | 5,520194797 | 0,300629834 | 0,667316029 |
| ALKBH4   | 0,649891925  | 3,12568413  | 0,301026346 | 0,667456769 |
| GAK      | -0,379010654 | 6,071322333 | 0,301029368 | 0,667456769 |
| TCEB2    | 0,562719753  | 9,669515877 | 0,301078408 | 0,667456769 |
| MRPL32   | 0,502108432  | 6,78268756  | 0,301084766 | 0,667456769 |
| WDR54    | 0,55300832   | 5,617863214 | 0,301250953 | 0,667608141 |
| ATRX     | 0,519983336  | 6,522540693 | 0,301506652 | 0,667957719 |
| SLC2A4RG | 0,556527914  | 7,45141916  | 0,301986601 | 0,668803713 |
| POP5     | 0,515553383  | 3,974070525 | 0,302231406 | 0,668985967 |
| PLA2G12A | -0,511074492 | 5,86318824  | 0,302306657 | 0,668985967 |
| CHD4     | 0,558103628  | 7,317255879 | 0,302363213 | 0,668985967 |
| NKG7     | -0,591272351 | 6,188722668 | 0,302601374 | 0,66929574  |
| PMM1     | -0,505676764 | 5,81701869  | 0,302840475 | 0,669607392 |
| TMEM67   | -0,482707291 | 3,350353212 | 0,303057657 | 0,669820729 |
| CCDC85B  | -0,434370586 | 6,527532273 | 0,303137583 | 0,669820729 |
| C19orf43 | -0,422901833 | 7,283898774 | 0,303231646 | 0,669820729 |
| ABCC3    | 0,953469788  | 5,297265472 | 0,30336655  | 0,669901717 |
| EIF2C3   | 0,701356578  | 6,882113379 | 0,30358999  | 0,670178097 |
| GOLGB1   | -0,495033128 | 6,25630708  | 0,303749693 | 0,670313642 |
| IFT57    | -0,414594647 | 6,053022826 | 0,304165415 | 0,671013901 |
| TAF9B    | 0,601683078  | 6,410449305 | 0,304451031 | 0,671273086 |
| ITM2B    | -0,5291747   | 9,897746401 | 0,304479785 | 0,671273086 |

|           |              |             |             |             |
|-----------|--------------|-------------|-------------|-------------|
| SGTA      | 0,507286021  | 6,439631367 | 0,304598419 | 0,671317589 |
| CBWD2     | 0,4404884    | 5,678683722 | 0,304994369 | 0,671973055 |
| SPRED2    | -0,472940735 | 5,472895877 | 0,305493386 | 0,672855104 |
| CCDC23    | -0,472478292 | 4,171126999 | 0,305651075 | 0,672985044 |
| ATAD3A    | 0,538541254  | 5,310949098 | 0,30623372  | 0,673824787 |
| WDR82     | 0,437588272  | 7,112629497 | 0,306323761 | 0,673824787 |
| SLC38A10  | -0,4289726   | 5,937346819 | 0,30634096  | 0,673824787 |
| C10orf47  | 0,856457655  | 5,628282001 | 0,306516161 | 0,673824787 |
| ATL2      | 0,452682009  | 5,801210054 | 0,306526542 | 0,673824787 |
| PKN1      | -0,486318675 | 7,021711206 | 0,306692012 | 0,673971262 |
| R3HDM1    | 0,423282943  | 6,410039891 | 0,306864533 | 0,674133134 |
| HINFP     | 0,554512037  | 4,70813668  | 0,307435325 | 0,674844021 |
| MRPL44    | 0,697212805  | 5,092931641 | 0,307481942 | 0,674844021 |
| CCDC91    | -0,42525549  | 5,213074103 | 0,307553326 | 0,674844021 |
| ACSL4     | 0,79341541   | 7,678892265 | 0,307583988 | 0,674844021 |
| PRKD3     | 0,517261967  | 6,576658749 | 0,307838163 | 0,675184442 |
| CHFR      | 0,627336285  | 5,840902379 | 0,308276866 | 0,675929244 |
| SLC1A4    | 0,800536282  | 5,838939511 | 0,308471489 | 0,676138567 |
| TM4SF1    | -0,532618108 | 8,051787254 | 0,308942163 | 0,676952638 |
| LLPH      | 0,617767314  | 6,892208156 | 0,309173529 | 0,677177128 |
| PRPS1     | 0,552288813  | 5,962917755 | 0,309243229 | 0,677177128 |
| ATP9A     | 0,712039286  | 4,553179054 | 0,309485219 | 0,677313535 |
| ZNF571    | 1,211147439  | 6,628682556 | 0,309504176 | 0,677313535 |
| SPG7      | 0,745296278  | 5,882649868 | 0,309636598 | 0,677385936 |
| NUP210    | 0,797860963  | 7,295349463 | 0,31002648  | 0,677644252 |
| TOMM7     | -0,512892072 | 3,432730453 | 0,310102769 | 0,677644252 |
| C10orf88  | 0,54715898   | 3,432942273 | 0,310150525 | 0,677644252 |
| ADNP      | 0,591389216  | 6,340235719 | 0,310252946 | 0,677644252 |
| PTPN3     | -0,472486924 | 4,803764214 | 0,310307369 | 0,677644252 |
| FBXL3     | -0,408644781 | 5,351198026 | 0,310350931 | 0,677644252 |
| SMARCD1   | -0,437941985 | 4,702697367 | 0,31049637  | 0,677744797 |
| SAT1      | -0,517222925 | 8,114129687 | 0,310640596 | 0,677842632 |
| CNPY3     | 0,532985776  | 7,324862137 | 0,310949273 | 0,678299134 |
| KCTD11    | 0,688806327  | 6,952374038 | 0,311098115 | 0,678406795 |
| MRPS31    | 0,480589402  | 5,095268118 | 0,311373299 | 0,678789811 |
| RNF167    | -0,442902515 | 5,583662473 | 0,311603843 | 0,679075297 |
| TPR       | -0,431854809 | 6,675297052 | 0,312062875 | 0,679537137 |
| LIG1      | 0,643617911  | 5,780848585 | 0,312101697 | 0,679537137 |
| POLG      | 0,576010561  | 5,71109242  | 0,31213176  | 0,679537137 |
| TRIP10    | -0,473733161 | 6,178344227 | 0,312261907 | 0,679537137 |
| RNF216    | 0,715032108  | 6,790907329 | 0,312314032 | 0,679537137 |
| FADS1     | -0,628193225 | 5,646111476 | 0,31251009  | 0,679695923 |
| ARHGEF12  | -0,413365518 | 8,390951162 | 0,312586364 | 0,679695923 |
| ILKAP     | 0,432930655  | 5,244671809 | 0,312800294 | 0,67971463  |
| TRAPPC2L  | -0,392291156 | 6,65473904  | 0,312810003 | 0,67971463  |
| LOC220729 | 0,605031108  | 3,514600507 | 0,312894005 | 0,67971463  |
| FAU       | 0,50314857   | 10,31785891 | 0,313013831 | 0,679758381 |
| GNPTAB    | -0,426145493 | 5,757482775 | 0,313357645 | 0,680170399 |
| CBR3      | 0,635141651  | 3,55392578  | 0,313403049 | 0,680170399 |
| S100A10   | 0,616371076  | 8,230806829 | 0,313588647 | 0,68035666  |



|           |              |             |             |             |
|-----------|--------------|-------------|-------------|-------------|
| ACTR2     | 0,456280651  | 9,185457816 | 0,313847245 | 0,680611473 |
| COASY     | 0,473276972  | 5,872445274 | 0,313905717 | 0,680611473 |
| SLC25A37  | 0,732358031  | 5,465330635 | 0,314014118 | 0,680630093 |
| NCBP1     | 0,420352069  | 6,239220068 | 0,314290955 | 0,68063221  |
| VPS25     | -0,470312363 | 6,01493309  | 0,314417681 | 0,68063221  |
| SDHAP2    | -0,609717747 | 6,098047534 | 0,31446281  | 0,68063221  |
| PRELID1   | 0,501236873  | 6,428266526 | 0,314480566 | 0,68063221  |
| ZNF131    | 0,711592362  | 4,56413872  | 0,314514166 | 0,68063221  |
| FOXK1     | 0,531195183  | 6,767741662 | 0,314754981 | 0,680761165 |
| NIPBL     | -0,393997358 | 7,42011801  | 0,314773421 | 0,680761165 |
| KIF3B     | 0,543304772  | 5,700010264 | 0,315306281 | 0,680777909 |
| ZBTB37    | -0,504238657 | 4,222972367 | 0,315455758 | 0,680777909 |
| ZNF142    | 0,673833118  | 5,023022515 | 0,315581537 | 0,680777909 |
| PDE4B     | -0,525608056 | 6,156686209 | 0,315709482 | 0,680777909 |
| LMF2      | 0,533048004  | 7,340047071 | 0,315766298 | 0,680777909 |
| TAGLN     | -0,658478592 | 9,066744637 | 0,315827522 | 0,680777909 |
| TMEM181   | -0,439806123 | 5,614285617 | 0,315861249 | 0,680777909 |
| ETHE1     | -0,525808646 | 5,039857184 | 0,315896129 | 0,680777909 |
| C17orf85  | 0,564421959  | 6,450269173 | 0,315920982 | 0,680777909 |
| UBQLN1    | 0,458507655  | 7,343415853 | 0,315965642 | 0,680777909 |
| ZNF823    | -0,422534821 | 3,635072026 | 0,316029358 | 0,680777909 |
| USP8      | 0,480174443  | 5,808364603 | 0,316051959 | 0,680777909 |
| BATF      | 0,75785583   | 5,243285959 | 0,316119012 | 0,680777909 |
| PRPF8     | -0,353599948 | 7,372036391 | 0,316178859 | 0,680777909 |
| SAP30BP   | 0,442947424  | 6,900400971 | 0,316595001 | 0,681458748 |
| ATP6AP2   | -0,437304836 | 7,050727107 | 0,316720602 | 0,681513974 |
| SIPA1L1   | 0,654250381  | 5,758800327 | 0,316855003 | 0,681570559 |
| KDM4B     | -0,476390847 | 4,446492774 | 0,317007951 | 0,681570559 |
| MRPL1     | -0,538121189 | 3,869947095 | 0,317046754 | 0,681570559 |
| SMARCD3   | -0,55792637  | 5,08045442  | 0,317521734 | 0,681988184 |
| REXO2     | 0,584113961  | 5,99935237  | 0,317529983 | 0,681988184 |
| CTTNBP2NL | -0,527782992 | 5,640151867 | 0,317541059 | 0,681988184 |
| SARNP     | 0,444723061  | 5,899683645 | 0,317797711 | 0,682301354 |
| CD86      | -0,51602364  | 4,59262147  | 0,317886993 | 0,682301354 |
| SLC38A7   | 0,611992521  | 3,841440965 | 0,318210658 | 0,682781144 |
| MRPL30    | 0,643786122  | 5,007584432 | 0,318456288 | 0,683093245 |
| NANP      | 0,545525974  | 4,944309165 | 0,319084659 | 0,684225877 |
| CRLF3     | 0,484657522  | 5,961285755 | 0,319286233 | 0,684442887 |
| CDK3      | 0,750096931  | 4,591623259 | 0,319512457 | 0,684570795 |
| MAT2A     | -0,529897994 | 6,201208984 | 0,31960696  | 0,684570795 |
| BCL2L1    | 0,573714109  | 7,452843481 | 0,319647076 | 0,684570795 |
| MTA3      | 0,521787053  | 6,505323325 | 0,320141048 | 0,68541344  |
| CAMLG     | 0,528973904  | 6,329887407 | 0,320283951 | 0,685504163 |
| KANK2     | -0,649321269 | 6,910382715 | 0,320401313 | 0,685540181 |
| NANS      | -0,464964195 | 5,293315621 | 0,320843354 | 0,686254506 |
| RIT1      | 0,566265941  | 5,160819717 | 0,320936445 | 0,686254506 |
| GRPEL1    | 0,557954313  | 5,302584831 | 0,321701289 | 0,687674322 |
| PUM2      | 0,412403281  | 7,681564287 | 0,322063204 | 0,688232211 |
| TAF10     | 0,551099449  | 6,859803338 | 0,322312668 | 0,688549524 |
| AP1S2     | 0,534872429  | 7,51684285  | 0,322569568 | 0,68888252  |

|          |              |             |             |             |
|----------|--------------|-------------|-------------|-------------|
| GNAQ     | -0,39353934  | 7,877664627 | 0,323033893 | 0,689658146 |
| EIF4EBP3 | -0,468510002 | 4,9355106   | 0,323340043 | 0,690015667 |
| NCOA2    | 0,803823274  | 6,396637151 | 0,323509922 | 0,690015667 |
| DNAJB12  | -0,450645256 | 3,824637267 | 0,323527057 | 0,690015667 |
| RBM15B   | -0,403720939 | 5,956744673 | 0,323606116 | 0,690015667 |
| PTPRF    | -0,440571959 | 6,99722523  | 0,323978859 | 0,69059451  |
| CAPN1    | 0,595781392  | 7,94367744  | 0,32411968  | 0,690678781 |
| IFNGR1   | -0,440189285 | 7,263041528 | 0,324526141 | 0,691137302 |
| IPO8     | -0,364055797 | 6,08616179  | 0,324634053 | 0,691137302 |
| RPS6KB1  | 0,470092885  | 6,409628917 | 0,324638918 | 0,691137302 |
| PTDSS1   | 0,544973907  | 6,486348043 | 0,325201997 | 0,69211998  |
| PSMA2    | 0,49507889   | 6,631348295 | 0,325452321 | 0,692434034 |
| BPHL     | 0,690561251  | 3,907060102 | 0,325779521 | 0,692434034 |
| DCP1A    | -0,364441602 | 6,021963187 | 0,325799911 | 0,692434034 |
| LRRFIP2  | 0,45017079   | 6,520811577 | 0,325910824 | 0,692434034 |
| SPSB1    | -0,55149844  | 6,482875455 | 0,325920647 | 0,692434034 |
| DNASE2   | -0,558570256 | 6,423200198 | 0,325958828 | 0,692434034 |
| DHX15    | 0,465976593  | 7,394986479 | 0,326096667 | 0,69251111  |
| PSMD6    | 0,600698278  | 5,630361375 | 0,326390509 | 0,692919328 |
| ARIH1    | -0,384950873 | 5,651466904 | 0,326733011 | 0,69320824  |
| RER1     | -0,561372141 | 5,740152015 | 0,326865138 | 0,69320824  |
| THOC6    | 0,474687761  | 4,563069563 | 0,326913346 | 0,69320824  |
| TBC1D20  | 0,640460204  | 6,60965259  | 0,327012794 | 0,69320824  |
| TMEM176B | -0,503760837 | 6,961205035 | 0,327034889 | 0,69320824  |
| ATPAF1   | 0,503448656  | 5,59429042  | 0,327189723 | 0,693320921 |
| ATG4A    | 0,577586844  | 3,732619186 | 0,327508409 | 0,693780628 |
| TIMM9    | 0,587967554  | 6,428973356 | 0,327972205 | 0,694353181 |
| PAPOLG   | 0,483255702  | 5,13371063  | 0,328078992 | 0,694353181 |
| HTT      | -0,401683625 | 6,375975766 | 0,328084169 | 0,694353181 |
| SURF1    | -0,388894439 | 4,681850025 | 0,328413577 | 0,694834683 |
| RNF114   | 0,498589134  | 7,262462109 | 0,328585694 | 0,694983203 |
| ATP5H    | 0,488147838  | 7,721665832 | 0,328745029 | 0,695066061 |
| XPR1     | 0,494645543  | 5,593631512 | 0,328854718 | 0,695066061 |
| JRKL     | 0,673300752  | 4,807302383 | 0,328930661 | 0,695066061 |
| DNAJA3   | 0,483283559  | 4,823952185 | 0,329211963 | 0,695214684 |
| BET1     | 0,547965153  | 6,771474951 | 0,329263334 | 0,695214684 |
| ZADH2    | 0,878934883  | 6,622727841 | 0,329341946 | 0,695214684 |
| COX16    | -0,476102117 | 6,564657775 | 0,329408805 | 0,695214684 |
| SACM1L   | -0,382261132 | 6,589598872 | 0,329973358 | 0,696174992 |
| MRPL48   | 0,675923226  | 4,634324427 | 0,330079079 | 0,696174992 |
| HNMT     | -0,493353138 | 6,923773357 | 0,330261232 | 0,696174992 |
| C7orf26  | -0,42642399  | 5,716515792 | 0,330336908 | 0,696174992 |
| NCKIPSD  | 0,6710554    | 5,342467799 | 0,330401754 | 0,696174992 |
| VPS4B    | -0,472324364 | 4,814724056 | 0,330476382 | 0,696174992 |
| HLTF     | 0,602152955  | 5,385508147 | 0,330690701 | 0,69641133  |
| GAPVD1   | -0,37584979  | 5,640245936 | 0,330907564 | 0,696652879 |
| POLD3    | 0,458268242  | 5,306619821 | 0,331202699 | 0,696812512 |
| KDELC2   | 0,760746203  | 6,115275096 | 0,331277339 | 0,696812512 |
| PFN1     | 0,531369904  | 12,14398297 | 0,331289949 | 0,696812512 |
| COL1A1   | 0,922691635  | 12,85970958 | 0,331833105 | 0,697634181 |

|          |              |             |             |             |
|----------|--------------|-------------|-------------|-------------|
| TDRD7    | -0,471576174 | 3,717384812 | 0,331885215 | 0,697634181 |
| MLLT10   | -0,416458022 | 4,745479339 | 0,332053963 | 0,697773798 |
| MARK4    | 0,610254525  | 4,979980293 | 0,332193228 | 0,697776898 |
| CPSF3L   | 0,716006921  | 6,454275798 | 0,332260095 | 0,697776898 |
| MTPAP    | 0,614370228  | 5,785976927 | 0,332977313 | 0,698854221 |
| FAM168B  | 0,512385898  | 7,858747961 | 0,333166331 | 0,698854221 |
| NID1     | -0,621387429 | 6,482163552 | 0,333173464 | 0,698854221 |
| ELP4     | -0,386774406 | 3,72025246  | 0,333213232 | 0,698854221 |
| COX18    | 0,487243606  | 5,046426263 | 0,333285515 | 0,698854221 |
| P4HB     | 0,688359767  | 8,837397726 | 0,334114313 | 0,700376728 |
| CLEC16A  | -0,447138499 | 5,034117043 | 0,334367375 | 0,700467142 |
| TPM1     | 0,716607124  | 8,997027418 | 0,334461893 | 0,700467142 |
| BDP1     | 0,529313824  | 6,371208701 | 0,334465613 | 0,700467142 |
| SF3A3    | 0,513233928  | 6,549021409 | 0,335169132 | 0,70153315  |
| STK10    | -0,446306741 | 4,978050463 | 0,335290563 | 0,70153315  |
| TTYH2    | -0,560081912 | 3,918781882 | 0,335478877 | 0,70153315  |
| CHST14   | -0,457771376 | 5,146079616 | 0,335482971 | 0,70153315  |
| EWSR1    | -0,375845022 | 8,250746367 | 0,335489016 | 0,70153315  |
| PIGF     | -0,418795406 | 5,318383116 | 0,335823092 | 0,701823501 |
| CCNI     | -0,385272172 | 8,69224294  | 0,335909599 | 0,701823501 |
| PELI2    | -0,538768185 | 5,706582987 | 0,335936634 | 0,701823501 |
| TMEM185B | -0,48448067  | 5,012815141 | 0,336219825 | 0,701992768 |
| TMEM19   | 0,534924978  | 5,515729784 | 0,336321621 | 0,701992768 |
| TMEM110  | 0,498752594  | 5,470876118 | 0,33638525  | 0,701992768 |
| COMMD10  | -0,384993718 | 4,843433781 | 0,336467622 | 0,701992768 |
| TSNAX    | -0,44962548  | 4,467827581 | 0,336583019 | 0,701992768 |
| RAB2B    | 0,474138839  | 5,904352202 | 0,336718734 | 0,701992768 |
| CLN6     | 0,475599666  | 7,01297921  | 0,336738282 | 0,701992768 |
| DDX42    | 0,489079794  | 6,37944971  | 0,337047358 | 0,702275907 |
| SIAH2    | 0,864630855  | 6,476997067 | 0,337080323 | 0,702275907 |
| TRAPPC9  | -0,493212784 | 6,510556657 | 0,337364244 | 0,702275907 |
| ZFYVE27  | 0,631096684  | 4,541429805 | 0,337559379 | 0,702275907 |
| EIF4A2   | 0,518072095  | 9,203638119 | 0,337609421 | 0,702275907 |
| RNF213   | 0,445797153  | 7,720140341 | 0,337620533 | 0,702275907 |
| SH3BGR13 | 0,678261361  | 10,80551644 | 0,33768138  | 0,702275907 |
| KLRK1    | -0,585606553 | 5,146304781 | 0,337698006 | 0,702275907 |
| TSPYL2   | -0,554447363 | 4,976568132 | 0,33786142  | 0,702401532 |
| ZC3H7B   | -0,463347064 | 6,083576307 | 0,33863907  | 0,703532331 |
| ARF4     | 0,45103028   | 8,458034921 | 0,338712508 | 0,703532331 |
| PTCD2    | -0,449114953 | 4,701934722 | 0,338714862 | 0,703532331 |
| ZNF414   | -0,405888874 | 5,062341356 | 0,338849098 | 0,703550917 |
| MYL12B   | -0,474259613 | 8,237049502 | 0,339039745 | 0,703550917 |
| CLIC4    | -0,456023465 | 9,234326253 | 0,339107455 | 0,703550917 |
| PARD3    | -0,478425536 | 4,644709769 | 0,33913651  | 0,703550917 |
| SLC25A30 | -0,420952653 | 5,291647534 | 0,339493073 | 0,703777553 |
| EIF4H    | 0,514250162  | 10,03753459 | 0,339634285 | 0,703777553 |
| FIBIN    | -0,622706502 | 5,334937958 | 0,33965938  | 0,703777553 |
| C15orf61 | -0,426934677 | 4,706741532 | 0,339760605 | 0,703777553 |
| PAIP1    | 0,525161765  | 6,960569967 | 0,339761799 | 0,703777553 |
| GGCX     | -0,396937019 | 5,795538851 | 0,340146941 | 0,703906411 |

|          |              |             |             |             |
|----------|--------------|-------------|-------------|-------------|
| ANP32B   | 0,582765537  | 7,849126461 | 0,340201022 | 0,703906411 |
| RAB8B    | -0,468693026 | 6,169397201 | 0,340333078 | 0,703906411 |
| HSD17B12 | -0,37162301  | 5,737399254 | 0,340558492 | 0,703906411 |
| TPT1     | -0,437004897 | 11,56319267 | 0,340680009 | 0,703906411 |
| UBB      | -0,356617073 | 11,08713033 | 0,340770971 | 0,703906411 |
| NSMCE1   | -0,391652478 | 5,595831891 | 0,340783709 | 0,703906411 |
| SRP68    | 0,399605843  | 5,671115452 | 0,341150996 | 0,703906411 |
| RPS21    | 0,514488925  | 10,45975883 | 0,341392284 | 0,703906411 |
| HELZ     | -0,451548387 | 6,802369416 | 0,341507616 | 0,703906411 |
| TBK1     | 0,46659646   | 6,230639991 | 0,341525698 | 0,703906411 |
| SNX16    | 0,568649366  | 4,051204909 | 0,341615276 | 0,703906411 |
| CCDC106  | -0,39316672  | 4,991287892 | 0,341825367 | 0,703906411 |
| VPRBP    | -0,366826229 | 3,707310925 | 0,341966057 | 0,703906411 |
| YWHAH    | -0,361911797 | 8,552336665 | 0,341972438 | 0,703906411 |
| CLSTN1   | 0,594847001  | 8,133632399 | 0,341983155 | 0,703906411 |
| PARP1    | 0,474064503  | 7,524682309 | 0,342061246 | 0,703906411 |
| SLC10A7  | -0,387974462 | 5,268449446 | 0,342096897 | 0,703906411 |
| SP140L   | -0,457257287 | 5,500891182 | 0,342343992 | 0,703906411 |
| RC3H1    | -0,373104498 | 6,211089914 | 0,342354444 | 0,703906411 |
| IMPDH2   | 0,505396679  | 7,758998464 | 0,342389309 | 0,703906411 |
| PPP3CB   | -0,49977899  | 4,656029194 | 0,342510888 | 0,703906411 |
| RC3H2    | 0,443971952  | 5,983149039 | 0,342648501 | 0,703906411 |
| ZNRF2    | 0,491209435  | 6,215784413 | 0,34281281  | 0,703906411 |
| CDK10    | -0,483700032 | 5,979755844 | 0,342833625 | 0,703906411 |
| SF3A2    | 0,581795594  | 6,101426087 | 0,342896719 | 0,703906411 |
| RRP1B    | 0,509100447  | 5,623167315 | 0,342908487 | 0,703906411 |
| EIF4E2   | 0,570486517  | 5,736682923 | 0,342915135 | 0,703906411 |
| OPTN     | 0,955365624  | 6,446792697 | 0,342948473 | 0,703906411 |
| VTA1     | -0,458611576 | 4,162594498 | 0,343034631 | 0,703906411 |
| CCDC69   | -0,50761266  | 5,428727918 | 0,343225284 | 0,703906411 |
| STAG1    | 0,668828329  | 5,445742656 | 0,343239855 | 0,703906411 |
| RB1      | -0,419376523 | 6,07937747  | 0,343248761 | 0,703906411 |
| MXI1     | 0,602254052  | 6,566290556 | 0,343333733 | 0,703906411 |
| DCLRE1C  | 0,525550688  | 5,05808402  | 0,343784811 | 0,704619365 |
| PTCD3    | 0,445262323  | 6,001868629 | 0,344227005 | 0,705313687 |
| UCK1     | -0,381898871 | 4,600357936 | 0,344744077 | 0,706160968 |
| FLOT2    | -0,431414704 | 6,602005396 | 0,345000001 | 0,706376123 |
| SCO1     | 0,576119353  | 5,127795493 | 0,345086221 | 0,706376123 |
| SLC38A2  | 0,482519543  | 8,624559047 | 0,345159883 | 0,706376123 |
| IRF3     | 0,443048787  | 6,854388589 | 0,345427363 | 0,706711427 |
| RPL4     | 0,518102991  | 11,32845186 | 0,345952772 | 0,7074453   |
| PATL1    | 0,513463207  | 6,13961893  | 0,345993558 | 0,7074453   |
| AGAP5    | -0,461972425 | 3,596049629 | 0,34613692  | 0,707526276 |
| ECHS1    | -0,333229449 | 6,071571525 | 0,346523243 | 0,707537149 |
| STARD10  | -0,513667325 | 5,504353933 | 0,346624423 | 0,707537149 |
| RPS23    | 0,484736832  | 11,40697039 | 0,346801515 | 0,707537149 |
| NUP153   | 0,539950433  | 6,860720536 | 0,346873545 | 0,707537149 |
| C19orf66 | -0,473816255 | 5,317193629 | 0,346958646 | 0,707537149 |
| FBXO21   | -0,416704881 | 4,901166757 | 0,346996137 | 0,707537149 |
| IVNS1ABP | 0,525135239  | 7,331034378 | 0,347085252 | 0,707537149 |

|           |              |             |             |             |
|-----------|--------------|-------------|-------------|-------------|
| C10orf118 | 0,542441908  | 6,25996217  | 0,347172293 | 0,707537149 |
| NEK11     | 0,62600289   | 3,919009168 | 0,347188535 | 0,707537149 |
| NFIB      | -0,501482275 | 5,165775969 | 0,347467529 | 0,707537149 |
| DNAJA1    | 0,416676103  | 8,672823161 | 0,347562595 | 0,707537149 |
| VPS29     | 0,432807903  | 7,056211915 | 0,347665695 | 0,707537149 |
| ST8SIA4   | 0,599833885  | 4,595053629 | 0,347738748 | 0,707537149 |
| ACAP3     | 0,732557394  | 4,951731593 | 0,347867576 | 0,707537149 |
| EIF2C1    | -0,432876016 | 5,026401269 | 0,347881153 | 0,707537149 |
| MAP7D1    | 0,382704358  | 6,726231685 | 0,347882205 | 0,707537149 |
| MAGOH     | 0,528385806  | 5,688299393 | 0,347906153 | 0,707537149 |
| ORMDL2    | 0,536063419  | 6,101677492 | 0,348240354 | 0,707648345 |
| MTCH2     | 0,41016691   | 6,332111638 | 0,348243066 | 0,707648345 |
| CSK       | 0,461161299  | 6,247577997 | 0,348272158 | 0,707648345 |
| PIGX      | 0,587665691  | 5,405736356 | 0,348708624 | 0,708324131 |
| TTC31     | -0,418566735 | 4,491293697 | 0,348828327 | 0,708356273 |
| COPS5     | 0,533702269  | 5,033207031 | 0,349039201 | 0,708573477 |
| PI4KAP1   | 0,843732548  | 7,01642153  | 0,349324238 | 0,708625668 |
| TARDBP    | 0,416981564  | 7,749963955 | 0,34946187  | 0,708625668 |
| FCF1      | 0,513723371  | 7,300425568 | 0,349622171 | 0,708625668 |
| IWS1      | 0,439225506  | 6,331031551 | 0,349628469 | 0,708625668 |
| PDHA1     | 0,419597842  | 6,670510859 | 0,349683334 | 0,708625668 |
| CCDC9     | -0,465143948 | 5,622849216 | 0,349823479 | 0,708625668 |
| CDK8      | 0,618124132  | 5,596641799 | 0,349853295 | 0,708625668 |
| PIK3CB    | 0,625916499  | 6,307646359 | 0,349896264 | 0,708625668 |
| DDX47     | 0,488072857  | 5,450209611 | 0,350463831 | 0,70896537  |
| NDUFA1    | 0,450324552  | 8,492348254 | 0,350499763 | 0,70896537  |
| NR1D2     | 0,56787434   | 5,336936777 | 0,350593307 | 0,70896537  |
| GATAD1    | 0,485640291  | 6,122137666 | 0,350680526 | 0,70896537  |
| MIER3     | -0,385090854 | 4,381076754 | 0,350698674 | 0,70896537  |
| SSR3      | 0,538211646  | 7,890149397 | 0,350786358 | 0,70896537  |
| SSPN      | -0,460139923 | 4,705226806 | 0,350791781 | 0,70896537  |
| SRRT      | 0,5778705    | 4,912129005 | 0,351076833 | 0,70914973  |
| MRPS24    | 0,528817651  | 6,073427537 | 0,351090994 | 0,70914973  |
| NBEA      | -0,645751025 | 4,887936516 | 0,351298454 | 0,709183436 |
| LDOC1     | 0,794691235  | 8,595904607 | 0,351315683 | 0,709183436 |
| FBRS      | -0,44211923  | 5,889294795 | 0,351515323 | 0,709289018 |
| ZNF805    | -0,377667    | 4,865404979 | 0,35157602  | 0,709289018 |
| CXADR     | -0,458670094 | 5,484831131 | 0,352143946 | 0,710208729 |
| ANKRD52   | 0,457522603  | 5,835675409 | 0,352279405 | 0,710208729 |
| PEX12     | 0,622553374  | 3,614376524 | 0,35243395  | 0,710208729 |
| SRGAP1    | -0,463829334 | 4,378414825 | 0,352505112 | 0,710208729 |
| ETV1      | -0,541639566 | 5,174352275 | 0,352552654 | 0,710208729 |
| C16orf80  | -0,345523562 | 3,504046554 | 0,352736888 | 0,710370006 |
| NUDT9     | -0,357189881 | 5,213665055 | 0,352904351 | 0,710497422 |
| MFSB7     | -0,45207861  | 4,037843169 | 0,353084526 | 0,710650348 |
| DDT       | 0,451613235  | 6,777691878 | 0,3534771   | 0,7111142   |
| GLRX3     | 0,51872758   | 6,176786935 | 0,353523557 | 0,7111142   |
| PAPOLA    | 0,455269734  | 6,124166215 | 0,353935558 | 0,711732991 |
| PNMA1     | 0,559119796  | 4,720641036 | 0,354200267 | 0,711893261 |
| LYN       | -0,436453304 | 5,438841765 | 0,354387086 | 0,711893261 |

|          |              |             |             |             |
|----------|--------------|-------------|-------------|-------------|
| DOCK10   | -0,418572769 | 4,715188989 | 0,354411538 | 0,711893261 |
| UBR3     | -0,40836715  | 4,711643773 | 0,354432853 | 0,711893261 |
| MYSM1    | -0,454155859 | 5,170024247 | 0,354861972 | 0,712448242 |
| PSME4    | 0,401870608  | 6,518888238 | 0,35503674  | 0,712448242 |
| SMEK1    | 0,493852871  | 6,012924739 | 0,355563329 | 0,712448242 |
| PRPF4B   | 0,639282232  | 7,114833472 | 0,355606061 | 0,712448242 |
| TMEM99   | 0,624305682  | 3,927809872 | 0,355617322 | 0,712448242 |
| SLTM     | -0,342864022 | 6,764292073 | 0,355651556 | 0,712448242 |
| RPL36AL  | -0,474900285 | 7,160195781 | 0,355668639 | 0,712448242 |
| DHRS7    | -0,428670242 | 4,145865233 | 0,35593247  | 0,712448242 |
| SPNS1    | -0,544150749 | 4,842099041 | 0,356086657 | 0,712448242 |
| OSBPL5   | -0,482878268 | 5,693601994 | 0,356096519 | 0,712448242 |
| MET      | 1,157500145  | 5,904160842 | 0,356266035 | 0,712448242 |
| RCN3     | 0,848781308  | 6,015295659 | 0,356292849 | 0,712448242 |
| SOS1     | -0,396680011 | 5,445135889 | 0,356380135 | 0,712448242 |
| AACS     | 0,458769838  | 4,975265086 | 0,356389195 | 0,712448242 |
| SNTB2    | 0,481181759  | 6,789642651 | 0,35651733  | 0,712448242 |
| GBAS     | -0,392837779 | 5,703017619 | 0,356588318 | 0,712448242 |
| CWC27    | 0,436234154  | 6,589041577 | 0,356632024 | 0,712448242 |
| C1orf43  | 0,454940627  | 8,047687091 | 0,356743521 | 0,712448242 |
| U2AF1    | 0,390274004  | 6,940121375 | 0,35678554  | 0,712448242 |
| ISCA1    | 0,551757419  | 4,474888407 | 0,357023185 | 0,712448242 |
| COIL     | -0,411556945 | 4,535617435 | 0,357052621 | 0,712448242 |
| ANXA2    | 0,591106311  | 10,71094495 | 0,357080824 | 0,712448242 |
| SETMAR   | 0,764397741  | 4,5520587   | 0,357134632 | 0,712448242 |
| WBP5     | 0,580487723  | 5,10698043  | 0,35721668  | 0,712448242 |
| SERPINH1 | 0,61311504   | 9,206394275 | 0,357328222 | 0,712462322 |
| SUPT4H1  | 0,443035756  | 7,507721803 | 0,358079269 | 0,713601916 |
| C12orf57 | -0,427603799 | 7,328933047 | 0,358109071 | 0,713601916 |
| HARBI1   | 0,535061529  | 3,804663449 | 0,358393947 | 0,713842184 |
| MSRB2    | -0,370098586 | 5,412169722 | 0,358439014 | 0,713842184 |
| HMG20A   | -0,37164813  | 5,474232974 | 0,359008943 | 0,714768463 |
| DGKD     | 0,631108368  | 4,986664622 | 0,359159292 | 0,714859081 |
| ZFX      | -0,345020833 | 6,52332663  | 0,359594089 | 0,715515639 |
| JOSD1    | 0,558688713  | 4,696814948 | 0,359733679 | 0,715584585 |
| PPP2R5C  | 0,510665437  | 6,426991552 | 0,360235434 | 0,7163568   |
| SEC31A   | 0,468662945  | 9,058855846 | 0,360331987 | 0,7163568   |
| TIMP1    | 0,793788285  | 10,81514515 | 0,360531315 | 0,716491834 |
| RFC2     | 0,538034432  | 5,501119656 | 0,360610056 | 0,716491834 |
| IFRD2    | 0,523626974  | 5,711283627 | 0,36093282  | 0,716924234 |
| SMURF2   | 0,684767207  | 5,003260872 | 0,361233519 | 0,71695826  |
| ABHD4    | -0,371824915 | 4,725777453 | 0,361247653 | 0,71695826  |
| RUNX3    | 0,628842003  | 5,395389773 | 0,361282902 | 0,71695826  |
| HECTD2   | -0,426021705 | 4,544107215 | 0,361570331 | 0,71695826  |
| CAPNS1   | -0,396730145 | 7,393280438 | 0,361571405 | 0,71695826  |
| NOL9     | 0,526153875  | 7,235067176 | 0,361648307 | 0,71695826  |
| AP1M1    | 0,48816544   | 7,071320312 | 0,361815633 | 0,71695826  |
| MSH3     | 0,565637842  | 3,648354106 | 0,362022308 | 0,71695826  |
| HDAC4    | 0,484943023  | 5,470885402 | 0,362041016 | 0,71695826  |
| CPD      | 0,558379905  | 7,022004436 | 0,362114631 | 0,71695826  |

|          |              |             |             |             |
|----------|--------------|-------------|-------------|-------------|
| NDE1     | 0,464128185  | 5,893428441 | 0,362209716 | 0,71695826  |
| CCDC124  | 0,562108735  | 6,682317215 | 0,362211645 | 0,71695826  |
| RBAK     | 0,566570144  | 5,122215005 | 0,362550758 | 0,717421247 |
| DENND1A  | -0,418355041 | 6,057265052 | 0,362710594 | 0,717529313 |
| TXLNG    | 0,495087125  | 4,872779359 | 0,362965894 | 0,717619084 |
| GSS      | 0,455120523  | 5,677196313 | 0,36296645  | 0,717619084 |
| CD58     | -0,373929626 | 5,656498496 | 0,363292048 | 0,71805463  |
| RECQL    | 0,802332694  | 5,476919222 | 0,363804417 | 0,718858974 |
| FBXL12   | 0,388144061  | 6,332541179 | 0,364378295 | 0,719784354 |
| MFSD1    | -0,477547396 | 6,039093415 | 0,364750889 | 0,720311703 |
| PPP1R11  | -0,357100231 | 6,668668334 | 0,3651552   | 0,72072385  |
| H2AFY2   | 0,78509395   | 4,532925037 | 0,365170978 | 0,72072385  |
| C2orf68  | 0,537598511  | 4,69117063  | 0,365358458 | 0,720773449 |
| MBD1     | 0,46414007   | 5,755998082 | 0,36540751  | 0,720773449 |
| ULK2     | -0,473326476 | 5,313369072 | 0,36553048  | 0,720807503 |
| FAM120A  | 0,435226145  | 7,940542726 | 0,365725052 | 0,720829564 |
| FZD1     | 0,646681893  | 7,449399917 | 0,365753086 | 0,720829564 |
| SOAT1    | 0,540413157  | 7,274542433 | 0,366070942 | 0,721247544 |
| IRF1     | -0,441135409 | 6,640823185 | 0,366290389 | 0,721282204 |
| EGFR     | 0,679121435  | 7,23790269  | 0,366300084 | 0,721282204 |
| SYPL1    | 0,55121624   | 7,703754948 | 0,366442752 | 0,721354828 |
| PCNX     | 0,442378634  | 6,920089927 | 0,366686156 | 0,721625655 |
| ZNF614   | 0,518707285  | 3,525577645 | 0,366906166 | 0,721679392 |
| GAS2L1   | 0,685012017  | 5,716669416 | 0,367076387 | 0,721679392 |
| PSMC5    | 0,427459257  | 7,117264324 | 0,367125357 | 0,721679392 |
| AKIRIN2  | -0,363434606 | 5,993522555 | 0,367136796 | 0,721679392 |
| TIMM10   | 0,471559572  | 6,280946902 | 0,367454372 | 0,721756764 |
| RAB5A    | 0,500843498  | 6,963356941 | 0,3674874   | 0,721756764 |
| LIG3     | 0,536568531  | 4,979474171 | 0,367493692 | 0,721756764 |
| SPPL2B   | 0,611170338  | 6,249511674 | 0,367671806 | 0,721811598 |
| TPI1     | 0,654249322  | 8,333259497 | 0,367733318 | 0,721811598 |
| OXR1     | -0,385687535 | 4,340892087 | 0,368050501 | 0,721831961 |
| RAB12    | 0,459232529  | 7,516920032 | 0,368058575 | 0,721831961 |
| KIAA1430 | 0,427943827  | 6,369597328 | 0,368237761 | 0,721831961 |
| RUNDC1   | 0,495021307  | 5,735598529 | 0,368256278 | 0,721831961 |
| ZNF224   | 0,790431422  | 6,998144087 | 0,368397596 | 0,721831961 |
| ING5     | -0,515804475 | 4,421246666 | 0,36847284  | 0,721831961 |
| RALB     | 0,695795993  | 6,745476719 | 0,368484683 | 0,721831961 |
| CHMP5    | 0,529952972  | 7,179848619 | 0,368691233 | 0,721880485 |
| ATP5F1   | 0,501202788  | 6,823765746 | 0,36872118  | 0,721880485 |
| TMEM164  | -0,42977013  | 5,82652078  | 0,368872531 | 0,721969515 |
| SNX1     | -0,350097372 | 6,39357227  | 0,369178061 | 0,722360172 |
| TREX1    | 0,652968214  | 4,212982484 | 0,369467695 | 0,722399497 |
| RRBP1    | 0,695611279  | 8,047786948 | 0,369483448 | 0,722399497 |
| FAM40A   | -0,356331816 | 5,256846759 | 0,369742478 | 0,722399497 |
| SFXN3    | -0,399714445 | 5,935599309 | 0,369750882 | 0,722399497 |
| ITGB3BP  | 0,652021485  | 4,49062288  | 0,369830334 | 0,722399497 |
| ABHD5    | -0,34065099  | 5,413806395 | 0,369833794 | 0,722399497 |
| ZNF485   | 0,815754209  | 4,693242009 | 0,369971655 | 0,722461831 |
| SLC20A2  | -0,431391571 | 4,384261441 | 0,370155838 | 0,722614561 |

|          |              |             |             |             |
|----------|--------------|-------------|-------------|-------------|
| RHOQ     | 0,47358349   | 6,841788095 | 0,370265268 | 0,722621312 |
| STARD4   | -0,398356397 | 4,404830519 | 0,370390962 | 0,722659791 |
| GRIPAP1  | 0,616844359  | 4,073381423 | 0,370571357 | 0,722668389 |
| NAPEPLD  | 0,451840967  | 4,483612781 | 0,370709645 | 0,722668389 |
| ADAM17   | -0,365284484 | 5,829451263 | 0,37084143  | 0,722668389 |
| ZNF462   | -0,479604835 | 4,961353087 | 0,370873817 | 0,722668389 |
| STAG2    | -0,420390822 | 4,206786211 | 0,370925262 | 0,722668389 |
| TXLNA    | 0,427534886  | 6,957533109 | 0,371260168 | 0,723114277 |
| KCTD3    | 0,459601726  | 6,471633193 | 0,371509189 | 0,723392677 |
| COX11    | 0,691063575  | 4,719819946 | 0,371669088 | 0,723497435 |
| SPPL3    | -0,429531661 | 6,475286166 | 0,371838129 | 0,723619921 |
| RARS2    | -0,362633127 | 5,512629057 | 0,372146173 | 0,724012769 |
| SNX6     | 0,644896537  | 6,762152303 | 0,37249545  | 0,724485588 |
| VPS45    | 0,576795182  | 5,535872232 | 0,372637757 | 0,724555707 |
| DYNC2H1  | -0,470224238 | 5,316403887 | 0,372824216 | 0,72471161  |
| ATP6V0E1 | -0,434688961 | 8,343276519 | 0,373051207 | 0,724821162 |
| PAF1     | 0,671180559  | 7,956534546 | 0,373093975 | 0,724821162 |
| HEATR2   | 0,410536877  | 6,422445857 | 0,373363473 | 0,724821162 |
| REPS1    | -0,362714361 | 5,602357146 | 0,373385956 | 0,724821162 |
| RFX1     | -0,409522467 | 5,427488899 | 0,373412046 | 0,724821162 |
| GIGYF2   | -0,377328525 | 6,118997162 | 0,373629072 | 0,72503604  |
| ARL5B    | 0,549034467  | 5,895847198 | 0,373992039 | 0,725533915 |
| RARRES1  | -0,428676574 | 5,804454249 | 0,374596272 | 0,726212137 |
| MAGT1    | -0,379774102 | 5,651278098 | 0,374652013 | 0,726212137 |
| ATP5I    | 0,43478698   | 7,925239546 | 0,374745387 | 0,726212137 |
| TMEM219  | -0,362120142 | 8,119097299 | 0,374784071 | 0,726212137 |
| STAT5B   | -0,352415343 | 6,191944886 | 0,375107048 | 0,726212137 |
| ACAT1    | -0,383674621 | 6,023883333 | 0,375158757 | 0,726212137 |
| C1GALT1  | 0,614137399  | 5,466453608 | 0,375301055 | 0,726212137 |
| PRMT1    | 0,445812294  | 8,074826293 | 0,375426305 | 0,726212137 |
| PPFIBP1  | -0,398322328 | 5,672760757 | 0,375554751 | 0,726212137 |
| C1orf54  | -0,473266795 | 5,481118856 | 0,375813259 | 0,726212137 |
| TRAK1    | -0,503434741 | 6,368082107 | 0,375832468 | 0,726212137 |
| MRPL37   | 0,485216935  | 6,53143798  | 0,375836768 | 0,726212137 |
| RANBP2   | 0,405195344  | 6,899882309 | 0,375900194 | 0,726212137 |
| ZBTB25   | -0,368934049 | 4,165126229 | 0,375951227 | 0,726212137 |
| SBDS     | 0,440070196  | 7,971101307 | 0,376099085 | 0,726212137 |
| KLHL5    | 0,463288668  | 6,049755231 | 0,37620215  | 0,726212137 |
| NAA16    | 0,534138735  | 4,293349606 | 0,376238117 | 0,726212137 |
| CEP57    | 0,765993768  | 5,114308081 | 0,376258613 | 0,726212137 |
| PSMB1    | 0,413277958  | 7,631039674 | 0,376720425 | 0,726695721 |
| TMEM45A  | 0,60240735   | 5,130082042 | 0,376722302 | 0,726695721 |
| ACOT11   | 0,630972481  | 3,765540662 | 0,37725028  | 0,727001133 |
| SLC7A6   | -0,418783261 | 3,554661856 | 0,377274174 | 0,727001133 |
| CCNG2    | 0,629118081  | 6,208165993 | 0,377285903 | 0,727001133 |
| PIAS2    | -0,404868326 | 6,033822242 | 0,377307084 | 0,727001133 |
| ZCCHC24  | -0,491991318 | 6,788669679 | 0,377433722 | 0,727039703 |
| LARP4    | 0,442870356  | 5,540205616 | 0,377843297 | 0,727490796 |
| NPHP3    | -0,471320075 | 5,253596142 | 0,37796192  | 0,727490796 |
| HAX1     | 0,445643601  | 7,05467288  | 0,377987959 | 0,727490796 |



|           |              |             |             |             |
|-----------|--------------|-------------|-------------|-------------|
| MGA       | -0,413221195 | 5,3539066   | 0,378145235 | 0,727588138 |
| TMEM2     | -0,459904662 | 5,154561646 | 0,37845261  | 0,727974145 |
| ARHGEF10L | 0,571757539  | 5,518068468 | 0,37880332  | 0,728431755 |
| XYLT2     | 0,601948311  | 6,170120493 | 0,37900304  | 0,728431755 |
| RAB7A     | 0,416278498  | 8,380862495 | 0,379010979 | 0,728431755 |
| LPIN3     | -0,438603744 | 4,781107549 | 0,37922891  | 0,728645234 |
| NISCH     | -0,423956837 | 5,560361197 | 0,379517285 | 0,728993906 |
| C10orf12  | 0,548335286  | 4,500183966 | 0,379658188 | 0,72905919  |
| WRN       | -0,358108876 | 5,358999625 | 0,37998678  | 0,729484755 |
| TBC1D9B   | -0,39920914  | 6,763848825 | 0,380980274 | 0,730709453 |
| NPEPL1    | -0,422372001 | 6,231630185 | 0,381008385 | 0,730709453 |
| ZCCHC11   | 0,495033405  | 5,4838687   | 0,381046925 | 0,730709453 |
| AGR2      | -0,632883381 | 7,714400253 | 0,381297197 | 0,730709453 |
| TRMT1     | 0,659659552  | 5,905672009 | 0,381418133 | 0,730709453 |
| DDX10     | 0,611473682  | 5,537045568 | 0,381491267 | 0,730709453 |
| OTUB1     | -0,311202652 | 6,14087943  | 0,38151597  | 0,730709453 |
| LEMD3     | 0,519968722  | 5,587520695 | 0,381524836 | 0,730709453 |
| SIRT6     | -0,387889503 | 4,29262194  | 0,3816159   | 0,730709453 |
| LIN37     | 0,443688977  | 5,653639704 | 0,381770114 | 0,730709453 |
| TOP2B     | 0,507397313  | 6,703021239 | 0,38181278  | 0,730709453 |
| PYGO2     | 0,543854579  | 5,156524614 | 0,382005083 | 0,730709453 |
| OSMR      | 0,649026836  | 7,382574966 | 0,382078256 | 0,730709453 |
| CLPX      | -0,338473761 | 5,574178893 | 0,382124932 | 0,730709453 |
| TECPR2    | 0,471031655  | 4,886003476 | 0,382947644 | 0,732077372 |
| CDK2AP1   | 0,48901292   | 8,181405605 | 0,383121824 | 0,732162858 |
| CDC42SE2  | -0,410417097 | 6,014626674 | 0,383287835 | 0,732162858 |
| DDX60L    | -0,401957834 | 4,586921665 | 0,383314475 | 0,732162858 |
| DUSP18    | -0,386724405 | 5,013029902 | 0,383510614 | 0,732332365 |
| MYL12A    | -0,449162271 | 8,326258387 | 0,383786596 | 0,732654199 |
| C6orf226  | 0,493820827  | 3,984745986 | 0,384242272 | 0,732828201 |
| SMURF1    | 0,499168097  | 7,061335012 | 0,384271587 | 0,732828201 |
| C22orf32  | -0,356853741 | 5,329427375 | 0,384333732 | 0,732828201 |
| GTF2I     | 0,441925081  | 6,251850307 | 0,384389659 | 0,732828201 |
| C11orf74  | 0,578192457  | 4,663150271 | 0,384415086 | 0,732828201 |
| GMIP      | -0,45690375  | 4,324589328 | 0,384740262 | 0,73324311  |
| B3GALT6   | 0,544626142  | 7,184787673 | 0,384997835 | 0,733516761 |
| C2orf29   | 0,407200442  | 6,845460289 | 0,385159833 | 0,733516761 |
| ARHGEF7   | -0,418688094 | 4,631862247 | 0,385349187 | 0,733516761 |
| ICK       | 0,440941691  | 5,035252814 | 0,385377031 | 0,733516761 |
| MED15     | -0,349942712 | 8,07664882  | 0,385421697 | 0,733516761 |
| NBN       | 0,464452744  | 6,150927108 | 0,385540308 | 0,733537767 |
| NAF1      | -0,370003098 | 4,126200605 | 0,385847303 | 0,733917087 |
| THAP11    | -0,39285359  | 5,083503762 | 0,386411081 | 0,734784485 |
| RAB32     | 0,533061736  | 5,619700109 | 0,386747431 | 0,734958088 |
| YWHAQ     | 0,481401581  | 9,391035745 | 0,386799989 | 0,734958088 |
| OSBPL2    | 0,486426869  | 6,75756871  | 0,386977988 | 0,734958088 |
| LOC253039 | 0,629323922  | 3,690887398 | 0,386981518 | 0,734958088 |
| TOR1AIP1  | -0,330062235 | 6,588727976 | 0,387120809 | 0,734958088 |
| ATG4B     | -0,394633433 | 6,453576004 | 0,387149062 | 0,734958088 |
| MYOF      | 0,573543466  | 8,297349621 | 0,387296169 | 0,735032723 |

|           |              |             |             |             |
|-----------|--------------|-------------|-------------|-------------|
| UQCRQ     | -0,431700644 | 7,62444131  | 0,387887702 | 0,735857209 |
| SLC26A2   | -0,487068552 | 5,011773358 | 0,387946424 | 0,735857209 |
| ARHGAP33  | 0,826593426  | 5,636654327 | 0,388123052 | 0,735987511 |
| ARMC8     | 0,672508219  | 7,404328318 | 0,388479213 | 0,736276126 |
| XPO1      | 0,603073049  | 6,266488243 | 0,388491201 | 0,736276126 |
| GOLT1B    | 0,488036361  | 6,50789121  | 0,388684772 | 0,736319889 |
| PSMD8     | 0,493580697  | 9,275765954 | 0,388779032 | 0,736319889 |
| MRPL54    | -0,402520356 | 5,267111298 | 0,388907025 | 0,736319889 |
| MAN2A2    | -0,437393016 | 6,91203859  | 0,389124083 | 0,736319889 |
| LRPAP1    | -0,370186455 | 6,646069512 | 0,389159401 | 0,736319889 |
| ELK4      | -0,325162215 | 6,794296471 | 0,389162176 | 0,736319889 |
| CDH1      | -0,521949038 | 5,947506625 | 0,389434344 | 0,736630455 |
| PRKRIR    | 0,586734259  | 6,586248791 | 0,390000072 | 0,737495977 |
| ALG6      | 0,530381627  | 4,9474434   | 0,390168386 | 0,73760971  |
| AP4B1     | 0,581831004  | 4,481989947 | 0,390455757 | 0,737948395 |
| C3orf52   | -0,453653758 | 3,748679806 | 0,390807317 | 0,738408173 |
| FTSJ2     | 0,456400831  | 4,386200016 | 0,391510202 | 0,739531321 |
| RPL5      | 0,436870364  | 10,50042619 | 0,391823199 | 0,73984149  |
| YEATS4    | 0,594535862  | 4,647315024 | 0,392011424 | 0,73984149  |
| FLII      | 0,445052504  | 7,18738878  | 0,392046063 | 0,73984149  |
| AGGF1     | 0,437993599  | 5,646487165 | 0,392214932 | 0,73984149  |
| NUDT4     | -0,314334853 | 6,673084213 | 0,392253546 | 0,73984149  |
| SLC25A24  | -0,36581282  | 4,835586422 | 0,392325389 | 0,73984149  |
| PTOV1     | 0,496384152  | 6,526067314 | 0,392712114 | 0,740366023 |
| MTOR      | 0,431262185  | 5,570105872 | 0,393093291 | 0,74087981  |
| NAT14     | 0,444837857  | 5,473181049 | 0,393367122 | 0,740890498 |
| ZYX       | -0,349932522 | 9,882768516 | 0,393427111 | 0,740890498 |
| TAB3      | 0,542333124  | 6,306137121 | 0,393604431 | 0,740890498 |
| PDK1      | 0,587525317  | 3,496551196 | 0,393873016 | 0,740890498 |
| OSBPL8    | 0,440109848  | 7,833403718 | 0,393905385 | 0,740890498 |
| TMEM41A   | 0,545448067  | 6,215903648 | 0,393907004 | 0,740890498 |
| DLG1      | 0,553479865  | 5,493322916 | 0,394016505 | 0,740890498 |
| HCLS1     | -0,398817407 | 5,911261507 | 0,394085314 | 0,740890498 |
| LOC650623 | -0,536796016 | 4,645617153 | 0,394164537 | 0,740890498 |
| C18orf21  | 0,502894251  | 5,743091079 | 0,394185471 | 0,740890498 |
| SAP18     | -0,358083996 | 7,755751504 | 0,394361892 | 0,741017839 |
| ZC3H6     | 0,584030731  | 4,38407273  | 0,39471833  | 0,741191792 |
| LOC90834  | -0,484613637 | 4,497149569 | 0,394865    | 0,741191792 |
| TRPT1     | 0,445268952  | 5,258018868 | 0,394925672 | 0,741191792 |
| PDS5B     | -0,371556946 | 4,841684229 | 0,394965946 | 0,741191792 |
| WDR1      | 0,407068412  | 6,105738831 | 0,395371293 | 0,741191792 |
| TTC5      | -0,45818619  | 4,685704913 | 0,395483009 | 0,741191792 |
| ISG15     | 0,754527839  | 7,022620736 | 0,395615012 | 0,741191792 |
| HP1BP3    | 0,444426514  | 7,191947798 | 0,395772712 | 0,741191792 |
| MDN1      | 0,523881556  | 6,062249846 | 0,39583914  | 0,741191792 |
| LRRCC1    | 0,522307399  | 4,211855361 | 0,395923772 | 0,741191792 |
| DEF6      | -0,37809244  | 4,276014019 | 0,395929366 | 0,741191792 |
| TEAD4     | 0,526048187  | 5,516784327 | 0,39595461  | 0,741191792 |
| PNRC2     | 0,448581425  | 8,351501489 | 0,395956969 | 0,741191792 |
| PHF23     | 0,442014005  | 4,69203438  | 0,396162    | 0,741191792 |

|           |              |             |             |             |
|-----------|--------------|-------------|-------------|-------------|
| PITPNA    | -0,351227085 | 6,382499048 | 0,396178225 | 0,741191792 |
| CRCP      | 0,408760375  | 6,408036696 | 0,396193589 | 0,741191792 |
| CTDSP1    | -0,345914342 | 8,081304409 | 0,396489098 | 0,741541184 |
| MUL1      | -0,356158261 | 4,310561294 | 0,396811665 | 0,741940977 |
| KLC2      | 0,642740312  | 5,083653047 | 0,396940842 | 0,741979057 |
| SUPT16H   | 0,442257708  | 5,186884878 | 0,39710221  | 0,742002594 |
| H3F3A     | -0,335549973 | 9,253333441 | 0,397256433 | 0,742002594 |
| ZNF484    | -0,389805347 | 2,957131377 | 0,397328354 | 0,742002594 |
| EIF3H     | 0,450087539  | 7,780765113 | 0,39738869  | 0,742002594 |
| SFRP4     | 0,968710435  | 6,63029723  | 0,39796861  | 0,74283991  |
| AKT1S1    | 0,461603137  | 4,775088181 | 0,39817634  | 0,74283991  |
| NRP1      | -0,425272321 | 7,718740612 | 0,398269994 | 0,74283991  |
| MYO9A     | -0,337887391 | 5,325682401 | 0,398382641 | 0,74283991  |
| SHKBP1    | 0,600092249  | 6,588187457 | 0,39845641  | 0,74283991  |
| SPCS1     | 0,449431268  | 8,362001539 | 0,398512417 | 0,74283991  |
| GOLGA1    | 0,453620111  | 4,042015509 | 0,398599682 | 0,74283991  |
| C21orf59  | -0,463930449 | 5,002810502 | 0,398832502 | 0,743070719 |
| RRAGA     | -0,330883637 | 6,486827612 | 0,399330258 | 0,743794872 |
| INVS      | -0,411554108 | 4,87681721  | 0,399725543 | 0,744163058 |
| SIVA1     | -0,405944256 | 6,009896184 | 0,399746192 | 0,744163058 |
| EIF4ENIF1 | -0,381067752 | 5,204101889 | 0,39991865  | 0,744280915 |
| RNF4      | 0,42967693   | 6,198084551 | 0,400278006 | 0,744693839 |
| C4orf34   | -0,456315936 | 6,488300746 | 0,400460133 | 0,744693839 |
| ATXN2L    | 0,371991602  | 7,309847502 | 0,400468149 | 0,744693839 |
| RPS27     | -0,349086476 | 9,768528708 | 0,400659262 | 0,744784166 |
| AARS      | 0,455240899  | 7,078315002 | 0,400915353 | 0,744784166 |
| C5orf42   | -0,424490256 | 5,831958311 | 0,400946458 | 0,744784166 |
| CIAO1     | 0,510204356  | 5,919054916 | 0,40105672  | 0,744784166 |
| HSPB1     | 0,538341897  | 11,68968098 | 0,401240969 | 0,744784166 |
| COX4I1    | 0,432093248  | 8,907215933 | 0,401256144 | 0,744784166 |
| GTF2IRD1  | 0,54846488   | 4,732960483 | 0,401281276 | 0,744784166 |
| SUMO2     | 0,408356375  | 9,50587131  | 0,401431218 | 0,744859722 |
| C9orf123  | 0,451681297  | 6,085144243 | 0,401637972 | 0,744880455 |
| CABIN1    | -0,419236409 | 6,057419193 | 0,401660864 | 0,744880455 |
| WEE1      | 0,504852724  | 6,438667771 | 0,401907856 | 0,744936025 |
| MRPS36    | -0,401490577 | 4,86210732  | 0,401909317 | 0,744936025 |
| ZNF574    | 0,586271241  | 4,418515849 | 0,402086894 | 0,744982798 |
| AARS2     | 0,609571048  | 4,526482626 | 0,402278277 | 0,744982798 |
| CARD16    | -0,502086076 | 5,564072016 | 0,402305023 | 0,744982798 |
| DVL3      | 0,58600174   | 7,065200598 | 0,402378833 | 0,744982798 |
| NDRG3     | -0,354001379 | 4,466012931 | 0,402480808 | 0,744982798 |
| CLP1      | 0,524312001  | 3,327224713 | 0,40284537  | 0,745455245 |
| HMGCS1    | 0,673422993  | 7,060930667 | 0,403001586 | 0,74545571  |
| SRM       | 0,425439724  | 6,599519795 | 0,403373524 | 0,74545571  |
| C1QA      | -0,518426336 | 8,473171532 | 0,40338562  | 0,74545571  |
| CDK5      | 0,562032531  | 4,448698824 | 0,403462145 | 0,74545571  |
| PRR3      | 0,648662022  | 5,427432423 | 0,403591842 | 0,74545571  |
| CD2BP2    | -0,388195638 | 5,466850272 | 0,403671791 | 0,74545571  |
| B4GALT3   | 0,382975929  | 5,959794259 | 0,403691515 | 0,74545571  |
| MBD6      | -0,372794968 | 5,868871868 | 0,403720184 | 0,74545571  |

|          |              |             |             |             |
|----------|--------------|-------------|-------------|-------------|
| ACAA1    | -0,337739054 | 6,078843914 | 0,40427461  | 0,746277359 |
| ZNF673   | 0,629699999  | 4,738838873 | 0,405246216 | 0,747868457 |
| TBC1D17  | -0,380987807 | 6,913940817 | 0,405550822 | 0,748228099 |
| COPS6    | -0,3317344   | 7,335232687 | 0,405776565 | 0,748297824 |
| GOLPH3L  | 0,473603666  | 4,770948474 | 0,405808088 | 0,748297824 |
| KHSRP    | 0,49193755   | 7,457079827 | 0,405980851 | 0,748299463 |
| CASP9    | -0,312553524 | 5,57868744  | 0,406028452 | 0,748299463 |
| RTEL1    | 0,458941102  | 5,706107021 | 0,406210789 | 0,748428859 |
| PLD3     | 0,801229359  | 11,05094778 | 0,406318175 | 0,748428859 |
| KIAA1217 | 0,525847812  | 6,107978955 | 0,406491864 | 0,748546589 |
| HPS4     | 0,614485723  | 4,916192225 | 0,406838303 | 0,748982287 |
| SEMA4A   | -0,416581584 | 5,523439664 | 0,407089396 | 0,749242264 |
| TAP1     | 0,490412982  | 6,862138397 | 0,40725604  | 0,749346718 |
| SBF1     | 0,48521757   | 7,06026212  | 0,407793832 | 0,749352856 |
| TPD52    | 0,651832611  | 4,910948216 | 0,40798439  | 0,749352856 |
| ICMT     | 0,425078507  | 5,806876246 | 0,40799855  | 0,749352856 |
| SF3B5    | -0,328281291 | 7,327582157 | 0,408069892 | 0,749352856 |
| FAM46A   | -0,438674648 | 5,511837821 | 0,408162814 | 0,749352856 |
| PHF14    | 0,51168104   | 5,030518227 | 0,408176355 | 0,749352856 |
| KIAA0753 | 0,420643593  | 3,43284424  | 0,408257086 | 0,749352856 |
| PLA2R1   | -0,457163723 | 4,64936046  | 0,408431611 | 0,749352856 |
| ARHGAP21 | 0,440124919  | 5,4501384   | 0,408433946 | 0,749352856 |
| RUFY1    | -0,361942879 | 5,773706434 | 0,408486932 | 0,749352856 |
| FKBP9    | 0,489037528  | 8,067125484 | 0,408516678 | 0,749352856 |
| RAB11A   | -0,309090158 | 6,629899724 | 0,408799782 | 0,749352856 |
| ZYG11B   | -0,33280129  | 4,446345013 | 0,408819916 | 0,749352856 |
| GPR56    | 0,768155088  | 6,803758445 | 0,408911528 | 0,749352856 |
| HYMAI    | -0,445512777 | 3,404434662 | 0,408992309 | 0,749352856 |
| HNRNPA0  | -0,344435217 | 6,457207035 | 0,40920336  | 0,749352856 |
| PRDX5    | -0,395501003 | 7,750039574 | 0,40925953  | 0,749352856 |
| RPL37A   | 0,414254824  | 11,56818181 | 0,409548943 | 0,749352856 |
| ARID4A   | -0,33203849  | 5,238728876 | 0,409600781 | 0,749352856 |
| MED8     | 0,366662357  | 5,604067571 | 0,409608287 | 0,749352856 |
| STK24    | 0,401086645  | 8,285673012 | 0,409651846 | 0,749352856 |
| DUS3L    | 0,45388599   | 4,779957017 | 0,409685409 | 0,749352856 |
| ARMC5    | 0,548487592  | 3,412255297 | 0,409786889 | 0,749352856 |
| PKNOX1   | -0,310573751 | 4,828030941 | 0,410089806 | 0,749664575 |
| CHMP1B   | -0,294419504 | 7,855496777 | 0,410177229 | 0,749664575 |
| TIAL1    | 0,366406737  | 5,295009053 | 0,410387526 | 0,74976889  |
| USP31    | 0,446656468  | 6,3380408   | 0,410536812 | 0,74976889  |
| FTH1     | -0,348438    | 12,3223263  | 0,410645274 | 0,74976889  |
| HERPUD2  | -0,319773737 | 6,367088254 | 0,410674117 | 0,74976889  |
| SDCCAG8  | -0,326507019 | 5,265665902 | 0,410832694 | 0,749857638 |
| QTRTD1   | 0,490002065  | 4,734421516 | 0,411117184 | 0,750018178 |
| SEC11A   | -0,445510283 | 5,354287603 | 0,411235041 | 0,750018178 |
| RPLP1    | 0,396892739  | 12,94077139 | 0,411520731 | 0,750018178 |
| DARS2    | 0,519688834  | 4,154726896 | 0,41155049  | 0,750018178 |
| ATF2     | -0,329675956 | 6,925640002 | 0,411637024 | 0,750018178 |
| DUT      | -0,383275964 | 5,910384961 | 0,411688833 | 0,750018178 |
| DNAJC13  | 0,457581975  | 7,577534089 | 0,411783259 | 0,750018178 |

|           |              |             |             |             |
|-----------|--------------|-------------|-------------|-------------|
| ARHGAP4   | -0,429073274 | 4,286640854 | 0,411886978 | 0,750018178 |
| PPAP2A    | -0,438415288 | 6,921328459 | 0,411910555 | 0,750018178 |
| RPS15A    | 0,390469022  | 10,19830972 | 0,412144404 | 0,750243644 |
| ZXDB      | 0,467582158  | 4,854324599 | 0,412406821 | 0,75052098  |
| MAK16     | 0,555396953  | 5,85297051  | 0,412654251 | 0,750770901 |
| MRPS17    | 0,41845554   | 4,7645006   | 0,412995169 | 0,751040881 |
| ZDHHC7    | -0,323085816 | 5,254479697 | 0,413022922 | 0,751040881 |
| RPL38     | 0,41928455   | 10,41158692 | 0,41343343  | 0,751382156 |
| MYO1E     | 0,487025972  | 5,766442541 | 0,413530756 | 0,751382156 |
| ITM2C     | -0,511122954 | 7,395071441 | 0,413541169 | 0,751382156 |
| C14orf119 | -0,371545286 | 5,298328107 | 0,414012869 | 0,751756398 |
| NIPA2     | 0,485894747  | 4,526129868 | 0,414043432 | 0,751756398 |
| TPM3      | 0,536127754  | 8,842678268 | 0,414077875 | 0,751756398 |
| RBM17     | 0,429149324  | 6,836221432 | 0,414467879 | 0,751998159 |
| PSMA7     | 0,364545282  | 8,558931756 | 0,414504925 | 0,751998159 |
| RCC2      | 0,539295377  | 7,220968567 | 0,41454188  | 0,751998159 |
| VPS13B    | 0,498492586  | 6,157929176 | 0,415342507 | 0,753117653 |
| CLTC      | 0,370836714  | 9,693579296 | 0,41539126  | 0,753117653 |
| HTRA2     | 0,430659106  | 5,776488628 | 0,41559271  | 0,753117653 |
| ZNF765    | 0,528523032  | 3,390891724 | 0,415600782 | 0,753117653 |
| NIPSNAP3A | 0,384588587  | 5,643437958 | 0,415827143 | 0,753195017 |
| GPKOW     | -0,323908149 | 4,492472249 | 0,415933997 | 0,753195017 |
| HNRNPK    | 0,380887635  | 8,585136018 | 0,41597484  | 0,753195017 |
| ASCC2     | 0,511969224  | 6,867351076 | 0,41613888  | 0,753273583 |
| IMMT      | 0,405311338  | 6,186124586 | 0,416239164 | 0,753273583 |
| ZNF649    | -0,429641365 | 3,958148108 | 0,416574091 | 0,753592782 |
| RXRA      | -0,402923808 | 6,506610243 | 0,41674005  | 0,753592782 |
| AIFM1     | -0,35516713  | 4,962561801 | 0,416808743 | 0,753592782 |
| MTR       | -0,325725013 | 5,600501157 | 0,4168576   | 0,753592782 |
| FHL3      | 0,51732172   | 6,379427151 | 0,417020609 | 0,753620132 |
| LRRC8C    | -0,378287357 | 6,443542417 | 0,417093764 | 0,753620132 |
| CDC26     | 0,424372518  | 6,611150828 | 0,417418349 | 0,75387132  |
| WAPAL     | 0,443903447  | 5,881051732 | 0,417471522 | 0,75387132  |
| MARCKS    | -0,400177991 | 5,555360669 | 0,417593047 | 0,75387132  |
| RBPJ      | 0,457583195  | 6,787272826 | 0,417675003 | 0,75387132  |
| BRD1      | -0,447986502 | 4,882343261 | 0,418236156 | 0,7546844   |
| BPTF      | 0,485773182  | 7,480935254 | 0,418550314 | 0,754728654 |
| VPS8      | 0,400073042  | 5,138309948 | 0,418645837 | 0,754728654 |
| FAM149B1  | -0,387333159 | 4,7420251   | 0,418672095 | 0,754728654 |
| HTRA1     | -0,412841769 | 7,186337965 | 0,418703402 | 0,754728654 |
| DSCR3     | -0,29389653  | 6,670082932 | 0,419168634 | 0,755367579 |
| LCLAT1    | 0,422498517  | 5,64705984  | 0,419525751 | 0,755777413 |
| CASC4     | -0,299391406 | 6,651552813 | 0,419617728 | 0,755777413 |
| ACTR10    | -0,354449627 | 5,649711124 | 0,419856046 | 0,755938558 |
| TBCCD1    | -0,414537607 | 4,855521025 | 0,419928913 | 0,755938558 |
| TRAF2     | 0,407624123  | 3,650244914 | 0,420148531 | 0,756068846 |
| LSM4      | 0,475986064  | 5,15805917  | 0,420223042 | 0,756068846 |
| PPP2R1A   | 0,439668471  | 6,81349439  | 0,420628639 | 0,75655253  |
| LYRM1     | -0,375646769 | 3,583029657 | 0,420807935 | 0,75655253  |
| SERPINB6  | -0,346334374 | 7,189199592 | 0,420875152 | 0,75655253  |

|           |              |             |             |             |
|-----------|--------------|-------------|-------------|-------------|
| IFT52     | -0,323684361 | 4,519445722 | 0,420935665 | 0,75655253  |
| ARFRP1    | -0,393799644 | 4,099592141 | 0,421204546 | 0,75683631  |
| GART      | 0,496002995  | 5,330793173 | 0,421411878 | 0,756862577 |
| TOMM6     | 0,495050905  | 6,897011139 | 0,421441151 | 0,756862577 |
| CHD8      | 0,527679201  | 4,108115838 | 0,421606825 | 0,756921638 |
| RPAP2     | 0,425516609  | 4,358361763 | 0,42176921  | 0,756921638 |
| LILRB4    | -0,421458817 | 5,170005265 | 0,421807042 | 0,756921638 |
| ZNF274    | 0,474283116  | 4,346183544 | 0,422674941 | 0,758132058 |
| FBXO31    | -0,3516013   | 5,262427012 | 0,422703928 | 0,758132058 |
| SNRNP200  | 0,478308637  | 7,206041402 | 0,423645498 | 0,759215898 |
| ZNF148    | -0,349124578 | 3,89125321  | 0,423656608 | 0,759215898 |
| PPIL3     | 0,460404321  | 4,182621914 | 0,423819575 | 0,759215898 |
| PSMB5     | 0,443707975  | 6,073178144 | 0,423857819 | 0,759215898 |
| CNOT3     | 0,47510366   | 6,50422369  | 0,423864925 | 0,759215898 |
| NCK1      | 0,397458761  | 6,407035438 | 0,424162755 | 0,759380026 |
| SNORA8    | -0,375173311 | 14,97867908 | 0,42418701  | 0,759380026 |
| ZCCHC8    | 0,498507202  | 6,920627965 | 0,424290643 | 0,759380026 |
| YBX1      | 0,594115916  | 9,885286396 | 0,424509097 | 0,759560115 |
| POLR3C    | 0,486473326  | 5,925768086 | 0,424634407 | 0,759560115 |
| HNRNPUL2  | 0,468483611  | 8,16466616  | 0,424780699 | 0,759560115 |
| GTPBP2    | 0,403957198  | 5,347976065 | 0,424928344 | 0,759560115 |
| HIST1H2BC | 0,554790727  | 8,370111047 | 0,424948209 | 0,759560115 |
| FAM190B   | 0,391763975  | 5,873817236 | 0,425236506 | 0,759876241 |
| EFNA1     | -0,561001207 | 5,606695598 | 0,425601446 | 0,760137258 |
| CSRP2BP   | -0,369807514 | 4,143165247 | 0,425782031 | 0,760137258 |
| ALKBH5    | 0,530342383  | 7,562783336 | 0,425813874 | 0,760137258 |
| NCKAP1    | 0,473652554  | 6,5380089   | 0,425842378 | 0,760137258 |
| IDS       | 0,446771543  | 8,696336871 | 0,426056898 | 0,760137258 |
| FLJ42627  | 0,607131271  | 6,340811551 | 0,426086594 | 0,760137258 |
| SLC12A9   | -0,341568745 | 6,546932354 | 0,426186876 | 0,760137258 |
| WARS      | 0,550228184  | 8,822659442 | 0,426420225 | 0,760137258 |
| IRF2BP1   | -0,425923463 | 5,025447896 | 0,426456712 | 0,760137258 |
| FN3K      | -0,453127885 | 4,483908376 | 0,426497309 | 0,760137258 |
| OLFML2B   | 0,809386279  | 6,066712033 | 0,426646126 | 0,760203798 |
| UBAC2     | -0,36340394  | 5,552016798 | 0,426929299 | 0,760509637 |
| COL6A2    | 0,444459587  | 11,13669906 | 0,427331204 | 0,760857102 |
| NDUFV2    | 0,376889274  | 6,248397946 | 0,427347514 | 0,760857102 |
| EGLN1     | 0,363763991  | 6,314091883 | 0,427534222 | 0,760990828 |
| ADD1      | -0,336533807 | 6,834599275 | 0,427766574 | 0,761161176 |
| SIGLEC11  | -0,441408012 | 4,583508851 | 0,427853173 | 0,761161176 |
| COPS7A    | 0,396248933  | 6,823328839 | 0,427968657 | 0,761168043 |
| VPS13C    | -0,324453806 | 7,339466103 | 0,428225727 | 0,761426657 |
| FAM175B   | 0,447461304  | 4,217116569 | 0,428497876 | 0,761711944 |
| FAM104B   | 0,387011496  | 5,602319049 | 0,428695169 | 0,761864049 |
| THAP4     | -0,363298817 | 4,340074014 | 0,429192877 | 0,762483789 |
| HERC4     | 0,433080232  | 6,272744461 | 0,429267527 | 0,762483789 |
| IBTK      | -0,320784591 | 5,182409209 | 0,429382339 | 0,762489107 |
| ASCC3     | 0,562254165  | 5,938060254 | 0,429812996 | 0,763055147 |
| FGFR1OP2  | 0,455858913  | 5,200201631 | 0,429951574 | 0,763102495 |
| TRIM4     | -0,343474727 | 4,214739558 | 0,430231423 | 0,763400487 |

|           |              |             |             |             |
|-----------|--------------|-------------|-------------|-------------|
| TNFRSF12A | 0,605230148  | 7,650823723 | 0,430539715 | 0,763748782 |
| GATC      | 0,525358688  | 5,354233839 | 0,430806263 | 0,763770534 |
| SEPT9     | 0,393363469  | 8,857514199 | 0,430865165 | 0,763770534 |
| CHSY1     | -0,414810185 | 5,537420222 | 0,430887996 | 0,763770534 |
| ZNF880    | 0,462591567  | 4,766211895 | 0,431083418 | 0,763895728 |
| IPPK      | 0,42714002   | 4,917359844 | 0,431182675 | 0,763895728 |
| GLI2      | 0,636782047  | 5,570518406 | 0,431516701 | 0,764227424 |
| SP2       | -0,31413983  | 4,842293583 | 0,431594047 | 0,764227424 |
| NDUFAF4   | 0,392923678  | 5,677197875 | 0,43207009  | 0,764692135 |
| LYST      | -0,413650534 | 5,780737215 | 0,432080774 | 0,764692135 |
| TMEM70    | 0,39474417   | 5,664953603 | 0,43239575  | 0,765051017 |
| CSF1      | -0,369187706 | 6,624931892 | 0,432511446 | 0,765057212 |
| INPP4A    | -0,328301331 | 4,859203363 | 0,432673876 | 0,765146048 |
| TALDO1    | 0,496120851  | 9,077816733 | 0,432931544 | 0,765403215 |
| ERCC2     | 0,43986524   | 4,003988934 | 0,433107145 | 0,765515195 |
| NFIA      | -0,465218766 | 7,667596274 | 0,433304133 | 0,76555512  |
| INSIG1    | -0,347378715 | 6,052680183 | 0,433411943 | 0,76555512  |
| CCDC93    | -0,394973233 | 3,793684852 | 0,433466537 | 0,76555512  |
| JTB       | 0,34412993   | 8,136082986 | 0,433615305 | 0,765612861 |
| RBM25     | -0,3732226   | 8,421715405 | 0,433836652 | 0,765612861 |
| CSF1R     | -0,362682345 | 5,196200575 | 0,433926576 | 0,765612861 |
| MESDC1    | 0,482332143  | 3,574240365 | 0,433948337 | 0,765612861 |
| DHX16     | 0,546288594  | 3,762290329 | 0,434257663 | 0,765960425 |
| MREG      | 0,518486017  | 4,654064684 | 0,434505455 | 0,766041161 |
| RPL29     | 0,423953313  | 10,48519055 | 0,434604272 | 0,766041161 |
| OAS1      | 0,632991695  | 4,939335164 | 0,434744105 | 0,766041161 |
| YWHAG     | 0,455953961  | 7,358399895 | 0,434798457 | 0,766041161 |
| DLAT      | 0,513899605  | 5,901697083 | 0,435079693 | 0,766041161 |
| PRPF38A   | -0,287672852 | 5,421216689 | 0,435080957 | 0,766041161 |
| MKLN1     | -0,331239077 | 5,566724007 | 0,435170625 | 0,766041161 |
| ZNF436    | -0,366168837 | 3,867007332 | 0,435279316 | 0,766041161 |
| UBE3C     | 0,435516723  | 6,729380047 | 0,435314489 | 0,766041161 |
| ARHGEF5   | 0,65110396   | 5,107128102 | 0,435788656 | 0,766394675 |
| DGCR2     | -0,390897323 | 6,487781789 | 0,435837456 | 0,766394675 |
| PLEKHA6   | 0,580919959  | 3,485322459 | 0,435852552 | 0,766394675 |
| SDHD      | -0,307963611 | 6,289855429 | 0,436014844 | 0,766482398 |
| APTX      | 0,519053341  | 4,31886323  | 0,436319941 | 0,766687403 |
| KIAA1522  | 0,530049545  | 7,012741777 | 0,436442102 | 0,766687403 |
| NSMCE4A   | -0,309623361 | 4,97342715  | 0,436468764 | 0,766687403 |
| ATP5G3    | 0,438732002  | 6,573382898 | 0,436661792 | 0,766828936 |
| DNAJC8    | -0,328847599 | 6,162957658 | 0,43677613  | 0,766832243 |
| C7orf49   | -0,383301117 | 3,512010391 | 0,437060931 | 0,767002752 |
| MTMR3     | -0,375871336 | 6,329027962 | 0,43709821  | 0,767002752 |
| CTNNBIP1  | -0,384907963 | 6,141654206 | 0,437319133 | 0,767192994 |
| EPM2AIP1  | -0,395273922 | 5,006553653 | 0,437574115 | 0,767442874 |
| ELL2      | 0,539594577  | 8,122778959 | 0,437722281 | 0,767505332 |
| COPE      | 0,40512199   | 8,184198579 | 0,437934321 | 0,767679726 |
| URM1      | -0,341296009 | 4,229325809 | 0,439190134 | 0,7695622   |
| CRLS1     | 0,361135336  | 5,980949709 | 0,439391851 | 0,7695622   |
| C20orf112 | 0,66785998   | 5,639380586 | 0,439411052 | 0,7695622   |

|           |              |             |             |             |
|-----------|--------------|-------------|-------------|-------------|
| DCP2      | 0,412015355  | 5,964211662 | 0,439459629 | 0,7695622   |
| OFD1      | -0,378529913 | 5,659796174 | 0,439652246 | 0,76970184  |
| RAPGEF6   | 0,420453442  | 5,016598048 | 0,440202158 | 0,770466764 |
| DGCR11    | 0,629456812  | 5,635800907 | 0,440401782 | 0,770618361 |
| GGCT      | 0,57409466   | 5,699430259 | 0,440534467 | 0,770652778 |
| MS4A6A    | -0,351573015 | 7,004413809 | 0,440811114 | 0,770890586 |
| ELMOD2    | 0,348508801  | 5,274320434 | 0,440896507 | 0,770890586 |
| LAPTM4A   | -0,346054164 | 9,734512091 | 0,441180646 | 0,77103215  |
| TRIM21    | 0,469526109  | 4,741336111 | 0,44121473  | 0,77103215  |
| TP53      | 0,509429395  | 7,111246222 | 0,441316686 | 0,77103215  |
| CAPN7     | -0,316255079 | 5,228683246 | 0,441679444 | 0,77119654  |
| SLC41A2   | 0,593374184  | 4,581014516 | 0,441734184 | 0,77119654  |
| METTL6    | 0,448201604  | 4,878975631 | 0,441750064 | 0,77119654  |
| TBC1D22A  | -0,303019154 | 5,754511313 | 0,442422142 | 0,772172148 |
| SNX13     | -0,357916883 | 6,032583446 | 0,442631499 | 0,772339864 |
| FBXL19    | -0,375407718 | 3,607403089 | 0,442854815 | 0,772531846 |
| LRIG1     | -0,432581144 | 6,126941342 | 0,443083272 | 0,772732693 |
| ATF5      | 0,529988915  | 6,653507066 | 0,443337201 | 0,772858836 |
| DDX24     | -0,302279986 | 7,221924708 | 0,443469906 | 0,772858836 |
| ZBTB44    | 0,437713021  | 5,541923749 | 0,443495619 | 0,772858836 |
| SCRIB     | 0,559082117  | 4,745121641 | 0,443868487 | 0,773170022 |
| MECP2     | -0,290158109 | 6,110089347 | 0,443929836 | 0,773170022 |
| ERGIC1    | -0,300337339 | 6,289708759 | 0,444185412 | 0,773170022 |
| APBA3     | 0,439573587  | 5,469906978 | 0,444255165 | 0,773170022 |
| INPP1     | -0,359160864 | 5,337792252 | 0,444277667 | 0,773170022 |
| ASH2L     | -0,427609304 | 5,269523496 | 0,444354497 | 0,773170022 |
| HACE1     | 0,418467736  | 4,53189113  | 0,444602647 | 0,773404452 |
| L3MBTL4   | -0,449532445 | 4,644018262 | 0,444758921 | 0,773469278 |
| RDX       | 0,485378546  | 7,899516312 | 0,444983121 | 0,773469278 |
| ZNF514    | -0,332643953 | 4,869407608 | 0,445091241 | 0,773469278 |
| UBE2E1    | 0,35559225   | 7,481090058 | 0,445093628 | 0,773469278 |
| TAF1D     | 0,440557214  | 7,114427924 | 0,445471966 | 0,773833168 |
| CCDC90B   | 0,466818496  | 4,838355863 | 0,445659746 | 0,773833168 |
| RNF149    | -0,304143875 | 6,70267524  | 0,44585282  | 0,773833168 |
| CYP20A1   | -0,273675965 | 6,208568848 | 0,445952652 | 0,773833168 |
| ARL8A     | -0,30606137  | 6,474098059 | 0,445972957 | 0,773833168 |
| ACBD5     | -0,347404774 | 5,060217499 | 0,44603662  | 0,773833168 |
| MORF4L2   | 0,582593585  | 5,577136638 | 0,446097402 | 0,773833168 |
| IL18R1    | 0,521825675  | 3,385842765 | 0,446347523 | 0,773917265 |
| HES4      | 0,737470795  | 5,089984123 | 0,44637287  | 0,773917265 |
| HCFC1     | 0,439755154  | 7,663654381 | 0,446629457 | 0,774101843 |
| USP16     | 0,400222371  | 6,186295067 | 0,446706372 | 0,774101843 |
| RICTOR    | 0,375116329  | 5,687811857 | 0,446932415 | 0,774296782 |
| CDK19     | -0,350501689 | 5,361266334 | 0,447180769 | 0,774373321 |
| CREB1     | -0,308411371 | 5,74723742  | 0,447203716 | 0,774373321 |
| ZNF507    | 0,426244752  | 3,880277678 | 0,447532479 | 0,774745869 |
| SPTLC1    | 0,326222468  | 7,124162731 | 0,447682242 | 0,774757723 |
| COL3A1    | 0,545164586  | 12,51324811 | 0,447766562 | 0,774757723 |
| KIDINS220 | -0,3149818   | 6,584156437 | 0,448165824 | 0,775195529 |
| BRPF3     | 0,493712037  | 5,934630843 | 0,448246953 | 0,775195529 |



|          |              |             |             |             |
|----------|--------------|-------------|-------------|-------------|
| SIK3     | 0,575919096  | 6,510730244 | 0,448717884 | 0,775767251 |
| GPD2     | 0,350663872  | 5,239531066 | 0,448805075 | 0,775767251 |
| MRPL49   | -0,331323264 | 4,051026943 | 0,449104732 | 0,776056809 |
| CEPT1    | -0,294613955 | 5,399976609 | 0,449248744 | 0,776056809 |
| CDK13    | -0,286438296 | 5,324239454 | 0,449349827 | 0,776056809 |
| PDCL     | -0,333326391 | 4,49255569  | 0,449427825 | 0,776056809 |
| C12orf29 | 0,389813917  | 4,515521372 | 0,449814095 | 0,776137794 |
| SIGLEC10 | -0,425325475 | 4,49422996  | 0,449822122 | 0,776137794 |
| POLR1A   | 0,377859845  | 5,23356303  | 0,449920029 | 0,776137794 |
| HSDL1    | 0,444567207  | 4,651380917 | 0,450022686 | 0,776137794 |
| NCKAP5L  | -0,336473278 | 5,559918317 | 0,450043824 | 0,776137794 |
| TNK2     | 0,636976783  | 6,024506495 | 0,450598504 | 0,776547239 |
| NUMB     | -0,309650907 | 7,303726754 | 0,450686441 | 0,776547239 |
| RGMB     | 0,53480983   | 5,365393667 | 0,450811858 | 0,776547239 |
| PTPRA    | -0,371465638 | 6,309512887 | 0,450866546 | 0,776547239 |
| SGPL1    | 0,419213967  | 6,28436871  | 0,450998764 | 0,776547239 |
| UGP2     | 0,449193665  | 6,776740393 | 0,45106941  | 0,776547239 |
| DDX19B   | -0,279009722 | 6,30848458  | 0,451135586 | 0,776547239 |
| RPL18A   | 0,398133975  | 10,10888067 | 0,451253722 | 0,776547239 |
| ZNF192   | 0,590993362  | 5,489964412 | 0,45130616  | 0,776547239 |
| PARP3    | -0,319442307 | 5,139139266 | 0,451659344 | 0,776958897 |
| RAB5C    | -0,284643075 | 7,628696446 | 0,452144193 | 0,777596785 |
| MTMR14   | -0,287619558 | 5,950071451 | 0,452395209 | 0,777720999 |
| KIAA0494 | -0,297043915 | 6,671256693 | 0,452444523 | 0,777720999 |
| TPP2     | 0,35762884   | 6,643319758 | 0,452560428 | 0,777724184 |
| ATP5A1   | 0,433095126  | 7,987319809 | 0,453386923 | 0,778948205 |
| USP32    | 0,337781804  | 6,860470556 | 0,453667221 | 0,779015067 |
| KIAA1468 | -0,292179317 | 5,291868221 | 0,453899394 | 0,779015067 |
| EIF3C    | -0,279622994 | 7,984909215 | 0,453907491 | 0,779015067 |
| CMTM3    | -0,305779042 | 7,358180734 | 0,453907573 | 0,779015067 |
| ATP5D    | -0,324179099 | 6,046259623 | 0,453997049 | 0,779015067 |
| UBR5     | 0,414298968  | 6,479225941 | 0,454185093 | 0,779141672 |
| FAM195B  | 0,413625481  | 6,132344308 | 0,454701307 | 0,779630039 |
| RFFL     | 0,393515898  | 6,201728931 | 0,454824241 | 0,779630039 |
| ISOC1    | 0,460235713  | 5,463291188 | 0,454872539 | 0,779630039 |
| SRPX     | 0,586029241  | 5,675130582 | 0,454927105 | 0,779630039 |
| ROGDI    | -0,314200853 | 5,777019853 | 0,455303483 | 0,780079008 |
| ALG8     | 0,500411062  | 5,421724038 | 0,45563202  | 0,780445804 |
| EIF3D    | 0,350974997  | 6,871969572 | 0,456244073 | 0,780869092 |
| PPP4C    | 0,321856764  | 6,903316802 | 0,456510025 | 0,780869092 |
| PCOLCE   | 0,73487166   | 8,260124371 | 0,456906086 | 0,780869092 |
| DUSP12   | 0,434741115  | 5,404915807 | 0,456977699 | 0,780869092 |
| INPPL1   | 0,425222868  | 6,647297874 | 0,457078401 | 0,780869092 |
| TSTA3    | 0,331816488  | 6,318127901 | 0,457087229 | 0,780869092 |
| NUP35    | 0,466688371  | 3,112658275 | 0,457258887 | 0,780869092 |
| TMEM126B | 0,538398871  | 5,878235355 | 0,457302031 | 0,780869092 |
| ZNF33A   | 0,395017899  | 5,838954915 | 0,457360768 | 0,780869092 |
| MRPL16   | 0,614737833  | 6,315225492 | 0,457416492 | 0,780869092 |
| ZNF548   | 0,644340779  | 3,620466619 | 0,457472808 | 0,780869092 |
| STK3     | 0,386774394  | 5,360431959 | 0,457478156 | 0,780869092 |

|           |              |             |             |             |
|-----------|--------------|-------------|-------------|-------------|
| SCARB1    | 0,684204434  | 6,17211525  | 0,457569691 | 0,780869092 |
| DDX21     | 0,580382507  | 5,106883768 | 0,457601689 | 0,780869092 |
| NSD1      | -0,390541902 | 3,099701403 | 0,457629545 | 0,780869092 |
| RBMS2     | -0,357607678 | 6,252707639 | 0,457863425 | 0,780869092 |
| FZD5      | -0,357527869 | 6,5193777   | 0,458078509 | 0,780869092 |
| TMLHE     | -0,388603407 | 4,004309045 | 0,458320077 | 0,780869092 |
| BRAP      | 0,383809451  | 5,853602911 | 0,458333074 | 0,780869092 |
| SCP2      | -0,324051292 | 5,422425876 | 0,458364569 | 0,780869092 |
| ITGB1BP1  | 0,348727418  | 6,956483159 | 0,458389483 | 0,780869092 |
| DPAGT1    | 0,453076801  | 4,879155053 | 0,458398442 | 0,780869092 |
| DDX60     | -0,345973622 | 5,480084936 | 0,458671643 | 0,781017042 |
| BAZ2A     | 0,366853997  | 6,324141534 | 0,458714365 | 0,781017042 |
| KDELR1    | 0,414420233  | 8,42384647  | 0,459360927 | 0,781834206 |
| SDC2      | 0,659834684  | 8,514814502 | 0,459521813 | 0,781834206 |
| EPB41L2   | -0,317117791 | 7,239059444 | 0,459538275 | 0,781834206 |
| FAM160B2  | -0,325086187 | 5,619155423 | 0,459988948 | 0,78229335  |
| SLK       | -0,304071822 | 5,062220629 | 0,460385026 | 0,78229335  |
| GPBP1L1   | 0,419990484  | 8,313972858 | 0,460444583 | 0,78229335  |
| RBMS1     | -0,291976416 | 7,746015195 | 0,460535228 | 0,78229335  |
| ZGPAT     | 0,401079802  | 4,685390304 | 0,460559523 | 0,78229335  |
| EDIL3     | 0,882154825  | 7,098720403 | 0,460630257 | 0,78229335  |
| ACTA2     | -0,546123006 | 8,951777628 | 0,460825009 | 0,78229335  |
| CUL5      | 0,4051905    | 5,702829679 | 0,460839296 | 0,78229335  |
| TSR1      | 0,517776644  | 4,902818639 | 0,460891301 | 0,78229335  |
| TIMM22    | 0,362576178  | 4,994676843 | 0,46099587  | 0,78229335  |
| FRG1      | 0,363396487  | 6,518415847 | 0,461130507 | 0,78229335  |
| COL5A1    | 0,565308272  | 8,135494601 | 0,461282171 | 0,78229335  |
| ANKRD36B  | -0,391095748 | 6,202914388 | 0,46129954  | 0,78229335  |
| NEK1      | 0,390391278  | 4,813842942 | 0,461503785 | 0,782380527 |
| TSEN34    | -0,324088954 | 5,194889959 | 0,461580416 | 0,782380527 |
| WIBG      | 0,42173143   | 5,245589804 | 0,462066586 | 0,782978479 |
| IMPACT    | 0,395117235  | 5,818999689 | 0,462162836 | 0,782978479 |
| FAM50A    | 0,41033268   | 5,039787197 | 0,462468344 | 0,783301449 |
| WRB       | -0,343815663 | 6,25321682  | 0,46266811  | 0,783372759 |
| ZNF44     | 0,566423649  | 5,824515464 | 0,463005188 | 0,783372759 |
| GABARAPL2 | -0,279042886 | 6,704360436 | 0,463009246 | 0,783372759 |
| CSTF2     | 0,356820537  | 4,492458465 | 0,463059528 | 0,783372759 |
| RAI1      | 0,455858208  | 6,714440188 | 0,46308485  | 0,783372759 |
| ZNF780A   | 0,634152294  | 5,650306993 | 0,463251982 | 0,783399219 |
| ZNF558    | 0,355164949  | 4,19248236  | 0,463330261 | 0,783399219 |
| SPAST     | 0,476528678  | 6,076804492 | 0,463633701 | 0,783717949 |
| DUSP3     | -0,298353827 | 5,796759378 | 0,464155005 | 0,784287219 |
| TRA2A     | -0,260501665 | 6,126210872 | 0,464200501 | 0,784287219 |
| CSNK2A2   | 0,402774397  | 7,053288235 | 0,464401544 | 0,784432531 |
| VPS18     | -0,293544423 | 4,778846923 | 0,464771788 | 0,784862196 |
| ZNF217    | -0,274089658 | 4,967300184 | 0,464886114 | 0,784862196 |
| DOPEY2    | -0,328159443 | 4,546951381 | 0,465329376 | 0,784919789 |
| ANKLE2    | 0,410292772  | 7,770283915 | 0,465351285 | 0,784919789 |
| AKAP10    | 0,444201065  | 5,899085493 | 0,465381908 | 0,784919789 |
| GSDMD     | -0,334623333 | 6,606244494 | 0,465405647 | 0,784919789 |

|         |              |             |             |             |
|---------|--------------|-------------|-------------|-------------|
| ZNF621  | 0,446457609  | 4,611549998 | 0,465571839 | 0,784919789 |
| SPPL2A  | -0,279233281 | 6,636094066 | 0,465721612 | 0,784919789 |
| FLOT1   | 0,380433433  | 7,760863721 | 0,465752972 | 0,784919789 |
| PRR24   | -0,379596666 | 5,626132314 | 0,466172244 | 0,784919789 |
| ACAD11  | 0,428514544  | 4,833193801 | 0,46621994  | 0,784919789 |
| VAV2    | 0,393161029  | 6,44848238  | 0,466229788 | 0,784919789 |
| JARID2  | 0,472638747  | 5,927967445 | 0,466274511 | 0,784919789 |
| MINK1   | -0,301771796 | 6,707472425 | 0,46630152  | 0,784919789 |
| PARG    | -0,353092156 | 3,753136137 | 0,466548173 | 0,785141162 |
| MRPL53  | 0,359263714  | 6,977124322 | 0,466688875 | 0,785184169 |
| TERF1   | 0,441682864  | 3,190064005 | 0,467179389 | 0,785785004 |
| CREBL2  | -0,337817014 | 5,760725025 | 0,467384762 | 0,785785004 |
| DCXR    | -0,3269501   | 6,120740035 | 0,467412476 | 0,785785004 |
| BRI3BP  | -0,301269441 | 4,732891935 | 0,467506931 | 0,785785004 |
| CGGBP1  | 0,342680044  | 6,28874522  | 0,467655353 | 0,785840771 |
| SEMA3C  | 0,675183107  | 6,936822314 | 0,467787065 | 0,785868439 |
| FEM1C   | -0,335547629 | 4,689541398 | 0,468106854 | 0,786211979 |
| TBC1D25 | 0,508253616  | 5,209612902 | 0,468246774 | 0,786253325 |
| QPCTL   | 0,770374209  | 4,940595567 | 0,468531524 | 0,786376314 |
| IREB2   | 0,376093525  | 6,129594839 | 0,468550662 | 0,786376314 |
| DDX46   | -0,349829253 | 4,652186392 | 0,468914967 | 0,786706153 |
| RPS13   | 0,425295005  | 10,00321388 | 0,468977931 | 0,786706153 |
| FBXW4   | -0,327493208 | 6,754509443 | 0,469548165 | 0,787403359 |
| ACOT8   | 0,417447575  | 4,622194958 | 0,469624499 | 0,787403359 |
| HSPH1   | 0,505685063  | 6,574045075 | 0,470114533 | 0,787477823 |
| PIK3AP1 | -0,366443778 | 6,30367051  | 0,470305708 | 0,787477823 |
| FAM175A | -0,363488629 | 4,95745709  | 0,470349763 | 0,787477823 |
| DDX55   | 0,406527964  | 5,83035907  | 0,470371048 | 0,787477823 |
| TMBIM6  | -0,337659498 | 9,790593116 | 0,47043897  | 0,787477823 |
| PDZD11  | 0,412395534  | 5,202414808 | 0,470466346 | 0,787477823 |
| WDR70   | 0,4032287    | 5,432982825 | 0,470477292 | 0,787477823 |
| ITPR3   | -0,319833964 | 6,472429762 | 0,47102679  | 0,787894629 |
| SUPV3L1 | 0,413437177  | 5,2034374   | 0,471159918 | 0,787894629 |
| SLC25A5 | 0,382046346  | 8,497538714 | 0,471212967 | 0,787894629 |
| SRPR    | -0,318729443 | 7,551239407 | 0,471226157 | 0,787894629 |
| CAPZA1  | 0,459310231  | 7,352223175 | 0,471539556 | 0,787894629 |
| LIMD2   | -0,299952504 | 5,81406345  | 0,471558886 | 0,787894629 |
| TMX1    | 0,386941655  | 7,158714599 | 0,471572309 | 0,787894629 |
| STUB1   | -0,374259013 | 4,053432248 | 0,471650664 | 0,787894629 |
| SF3A1   | -0,298448336 | 7,446388589 | 0,472330817 | 0,788431192 |
| CD2AP   | 0,47957747   | 7,938957852 | 0,472360821 | 0,788431192 |
| CTNNA1  | 0,57531428   | 6,243273019 | 0,472396657 | 0,788431192 |
| PGAP1   | -0,317755136 | 6,030440384 | 0,472500515 | 0,788431192 |
| CTSA    | -0,32840172  | 7,158592022 | 0,472647991 | 0,788431192 |
| ZNF212  | 0,481887378  | 3,41830155  | 0,472665598 | 0,788431192 |
| TRAM1   | -0,301385883 | 8,151095693 | 0,472810524 | 0,788480059 |
| BAZ1A   | 0,461850673  | 5,162294146 | 0,473207336 | 0,788837297 |
| FSCN1   | 0,511790754  | 7,670185137 | 0,473256105 | 0,788837297 |
| WIPF1   | -0,357897395 | 6,932038511 | 0,473418627 | 0,788915352 |
| PCMT1   | 0,476168944  | 4,168604605 | 0,473656422 | 0,789118774 |

|          |              |             |             |             |
|----------|--------------|-------------|-------------|-------------|
| GDI1     | 0,477984719  | 6,357918607 | 0,474238797 | 0,78953584  |
| EHD1     | -0,346466896 | 6,198125311 | 0,474370409 | 0,78953584  |
| FOXN2    | 0,384873814  | 4,249081595 | 0,474393156 | 0,78953584  |
| FAM178A  | -0,299114906 | 5,221590677 | 0,474684646 | 0,78953584  |
| AP1B1    | 0,383507148  | 7,363265831 | 0,474694977 | 0,78953584  |
| SRRM1    | -0,325627245 | 7,473703879 | 0,474713839 | 0,78953584  |
| LAMB1    | -0,291577863 | 7,383683419 | 0,474872023 | 0,78953584  |
| PDIA3P   | 0,318445361  | 8,475297786 | 0,474996096 | 0,78953584  |
| SAR1A    | -0,257198041 | 6,952352692 | 0,475109361 | 0,78953584  |
| PPP1CA   | 0,35341091   | 7,744483634 | 0,475278215 | 0,78953584  |
| ADCY9    | -0,339481121 | 5,271899533 | 0,475389996 | 0,78953584  |
| CNIH     | 0,312415426  | 7,687409595 | 0,475517477 | 0,78953584  |
| RABEP1   | 0,553615703  | 5,417678431 | 0,475591328 | 0,78953584  |
| MAP3K1   | -0,331658054 | 6,322956775 | 0,475647847 | 0,78953584  |
| SKA2     | 0,522076045  | 5,179861299 | 0,475734245 | 0,78953584  |
| JAK2     | -0,321640454 | 5,134202717 | 0,475759315 | 0,78953584  |
| TIPRL    | 0,38739374   | 4,759560892 | 0,476029252 | 0,789791598 |
| ZNF320   | 0,574268189  | 4,905547024 | 0,476618831 | 0,790577428 |
| DNTTIP2  | 0,462545624  | 6,760809761 | 0,476886415 | 0,790828906 |
| PPP2R4   | 0,405225986  | 5,836167798 | 0,477813457 | 0,792173588 |
| ZNF117   | 0,669622307  | 5,447801676 | 0,478213713 | 0,79253059  |
| WDR44    | 0,429556551  | 5,365191564 | 0,478261238 | 0,79253059  |
| TIMM17B  | 0,384410955  | 4,198048388 | 0,478427174 | 0,79261295  |
| AHI1     | -0,357059216 | 4,859294984 | 0,478939785 | 0,793269466 |
| RAB3IP   | -0,311695362 | 4,712937509 | 0,479250121 | 0,793590717 |
| IDH1     | 0,456308679  | 6,470713399 | 0,479791172 | 0,794293761 |
| DDX58    | 0,580513972  | 6,649253815 | 0,480229129 | 0,794477864 |
| SAMD8    | -0,301957704 | 3,767830873 | 0,480320873 | 0,794477864 |
| ZFHX3    | -0,348744172 | 7,465337    | 0,480403019 | 0,794477864 |
| PPP1R15B | 0,330551286  | 7,674817025 | 0,480498014 | 0,794477864 |
| ARHGAP1  | -0,288661185 | 7,59992885  | 0,480542195 | 0,794477864 |
| NRBF2    | 0,500523227  | 5,514321385 | 0,480661037 | 0,794477864 |
| EPB41    | -0,360641533 | 5,202562716 | 0,480717945 | 0,794477864 |
| PGGT1B   | -0,270502677 | 5,014640372 | 0,480917646 | 0,794508666 |
| LARS     | 0,313231144  | 6,257058947 | 0,480995467 | 0,794508666 |
| ING3     | 0,355009741  | 3,750018431 | 0,481086124 | 0,794508666 |
| APEX1    | 0,432798532  | 6,617061267 | 0,481203558 | 0,794510185 |
| CDK11B   | 0,398001791  | 5,44289176  | 0,48156941  | 0,794882143 |
| APPL2    | 0,389591792  | 5,095694416 | 0,481661976 | 0,794882143 |
| ZCCHC10  | 0,356502271  | 4,077869052 | 0,482197179 | 0,795572843 |
| ZNF827   | 0,414135965  | 4,983746953 | 0,482553389 | 0,795681018 |
| TFB2M    | 0,475277878  | 4,168156541 | 0,482637923 | 0,795681018 |
| CANX     | -0,426696175 | 7,819794006 | 0,482736265 | 0,795681018 |
| SGSM3    | -0,32935302  | 6,863006461 | 0,482925122 | 0,795681018 |
| TWF2     | -0,301679844 | 7,070630872 | 0,483034659 | 0,795681018 |
| VDAC3    | 0,585983597  | 6,534012451 | 0,483122654 | 0,795681018 |
| ERGIC3   | 0,405528865  | 7,093682481 | 0,483163526 | 0,795681018 |
| TECR     | -0,335179933 | 7,317630167 | 0,483246956 | 0,795681018 |
| IL7R     | -0,460332441 | 6,632615194 | 0,483338712 | 0,795681018 |
| CALR     | -0,315673444 | 10,00756553 | 0,483502601 | 0,795681018 |

|          |              |             |             |             |
|----------|--------------|-------------|-------------|-------------|
| ANXA6    | -0,332047742 | 8,403229866 | 0,483546288 | 0,795681018 |
| PHC3     | -0,285080288 | 6,805407517 | 0,483996015 | 0,796106473 |
| TBC1D22B | 0,393509448  | 4,226299741 | 0,484038339 | 0,796106473 |
| MSN      | -0,283114316 | 7,744714655 | 0,484271268 | 0,796290145 |
| KRT19    | 0,633299823  | 7,715291653 | 0,484383564 | 0,796290145 |
| TAB1     | -0,30952887  | 4,373455885 | 0,484679604 | 0,796584773 |
| KIAA1191 | 0,414740531  | 7,142712948 | 0,48490725  | 0,796654568 |
| SNX33    | -0,306311364 | 5,813141456 | 0,484984553 | 0,796654568 |
| GLT8D2   | 0,45521265   | 5,064620038 | 0,485072557 | 0,796654568 |
| UBTD2    | 0,386653093  | 6,084841962 | 0,485736728 | 0,797553274 |
| CCDC134  | 0,471716162  | 4,983607366 | 0,486020614 | 0,797610313 |
| RNF181   | 0,374748551  | 7,066187    | 0,486048127 | 0,797610313 |
| SYDE1    | 0,420510718  | 6,414122887 | 0,486161765 | 0,797610313 |
| PDE4D    | -0,386304558 | 5,862579859 | 0,486435351 | 0,797610313 |
| STT3A    | 0,343395548  | 7,084878331 | 0,486453032 | 0,797610313 |
| ZNF23    | 0,396566159  | 4,409348187 | 0,48655109  | 0,797610313 |
| EI24     | 0,374119689  | 7,434240278 | 0,486590248 | 0,797610313 |
| MYO5A    | 0,399321349  | 6,546402743 | 0,487048153 | 0,797781811 |
| EEF1G    | 0,410200912  | 10,90598924 | 0,487253504 | 0,797781811 |
| HIPK1    | 0,616549248  | 4,26697555  | 0,487309421 | 0,797781811 |
| C7orf43  | -0,2720333   | 5,377117773 | 0,48731598  | 0,797781811 |
| PDGFRA   | -0,42645525  | 6,794564886 | 0,487416353 | 0,797781811 |
| STX6     | -0,303182882 | 5,232359616 | 0,487575891 | 0,797781811 |
| NSL1     | 0,469962382  | 4,947295078 | 0,487619325 | 0,797781811 |
| NUPL1    | 0,304303253  | 5,885766543 | 0,487630824 | 0,797781811 |
| RAB14    | -0,348592041 | 7,45254176  | 0,487821025 | 0,797901552 |
| EXOC6B   | -0,324474961 | 4,21915964  | 0,488647828 | 0,799062239 |
| NUBP1    | -0,249051132 | 5,006361791 | 0,488846092 | 0,799067823 |
| NFATC2IP | 0,320183793  | 6,442172213 | 0,488885608 | 0,799067823 |
| FNIP1    | -0,29739756  | 6,608351839 | 0,489249835 | 0,79935998  |
| UBL5     | -0,307048139 | 5,59765064  | 0,489355984 | 0,79935998  |
| ZFAND5   | -0,301442416 | 8,79727178  | 0,489416031 | 0,79935998  |
| CDC37    | -0,282281137 | 6,541122179 | 0,489956952 | 0,799816959 |
| HMG2     | -0,250205627 | 7,042488695 | 0,489990582 | 0,799816959 |
| STRBP    | 0,398082819  | 3,991537423 | 0,490047698 | 0,799816959 |
| AHCTF1   | 0,382891456  | 6,04612992  | 0,490210513 | 0,799891238 |
| TRIM27   | 0,389176049  | 6,02582521  | 0,490805089 | 0,800577163 |
| MOV10    | 0,436688997  | 6,127634654 | 0,490865687 | 0,800577163 |
| PTPRS    | -0,437441309 | 6,624641619 | 0,490994732 | 0,800596144 |
| ARFGEF1  | 0,322333948  | 5,579579494 | 0,491134314 | 0,800632295 |
| EIF5     | 0,335263471  | 5,944473789 | 0,491563331 | 0,801100014 |
| UNC50    | -0,28373234  | 6,069230122 | 0,49165619  | 0,801100014 |
| CCDC130  | 0,523863193  | 4,008140751 | 0,491920579 | 0,801319753 |
| SAMD4A   | -0,346799736 | 5,206188245 | 0,492041596 | 0,801319753 |
| NFE2L2   | -0,303126719 | 7,119069093 | 0,492143588 | 0,801319753 |
| GGA1     | -0,302755863 | 4,628749965 | 0,492776688 | 0,802007891 |
| TUBB6    | -0,384150592 | 6,551919743 | 0,492801446 | 0,802007891 |
| MFS6     | -0,353019968 | 6,281635848 | 0,493022304 | 0,802175875 |
| POLR1D   | -0,327891755 | 5,635459008 | 0,493188688 | 0,802255167 |
| ASPN     | 0,711430553  | 6,858813595 | 0,493407925 | 0,802420377 |

|           |              |             |             |             |
|-----------|--------------|-------------|-------------|-------------|
| TUSC3     | -0,387569181 | 6,47728178  | 0,494163396 | 0,803427573 |
| SPSB2     | 0,435519908  | 4,059480464 | 0,494262893 | 0,803427573 |
| RAVER1    | 0,466636456  | 6,504310685 | 0,494434983 | 0,803515766 |
| GLA       | 0,385351082  | 4,855447043 | 0,495212818 | 0,80419882  |
| PNN       | 0,391335745  | 6,426706265 | 0,495247086 | 0,80419882  |
| STX18     | 0,435613805  | 5,902829138 | 0,495298909 | 0,80419882  |
| CIQTNF3   | 0,776960021  | 5,228114615 | 0,495327034 | 0,80419882  |
| PMS1      | 0,442364007  | 3,874195878 | 0,495817712 | 0,804384144 |
| SMARCA1   | -0,289815809 | 6,190692772 | 0,495837673 | 0,804384144 |
| NUP50     | 0,338745037  | 6,313704231 | 0,495849945 | 0,804384144 |
| ZNHIT1    | -0,293415484 | 5,540402086 | 0,495913028 | 0,804384144 |
| FNTA      | 0,380676581  | 6,435672063 | 0,496271447 | 0,804774077 |
| MRFAP1L1  | 0,35919713   | 6,402908983 | 0,496809122 | 0,805277067 |
| MUT       | -0,288025332 | 5,346853244 | 0,496817806 | 0,805277067 |
| AMD1      | -0,270840801 | 6,165015873 | 0,497361433 | 0,805456861 |
| MRPL43    | -0,249423038 | 6,650873199 | 0,497370916 | 0,805456861 |
| VPS11     | -0,265024184 | 5,749774418 | 0,497379601 | 0,805456861 |
| CDK2AP2   | -0,28797781  | 6,511944033 | 0,497401209 | 0,805456861 |
| ATP6V1A   | 0,350389249  | 5,510289554 | 0,497603106 | 0,805592493 |
| KIAA1731  | 0,417433265  | 4,913231751 | 0,497825966 | 0,805761989 |
| CDC42SE1  | 0,313098052  | 7,045687438 | 0,498275553 | 0,806002996 |
| ACAA2     | -0,261566998 | 6,173344224 | 0,49840943  | 0,806002996 |
| TMEM60    | -0,364632236 | 5,78926422  | 0,498474524 | 0,806002996 |
| PANK3     | 0,339336967  | 6,554472089 | 0,49861647  | 0,806002996 |
| GPAM      | 0,454643034  | 5,203051225 | 0,498793964 | 0,806002996 |
| RPL27A    | 0,379880092  | 11,18319969 | 0,498837348 | 0,806002996 |
| SYNRG     | 0,346197756  | 6,819170034 | 0,498985791 | 0,806002996 |
| FLJ45340  | -0,307820408 | 6,443811612 | 0,499053229 | 0,806002996 |
| SSRP1     | 0,311659877  | 7,410799054 | 0,499175173 | 0,806002996 |
| TRIO      | 0,390452842  | 7,295326039 | 0,49939767  | 0,806002996 |
| C1orf85   | 0,376783905  | 6,893250125 | 0,499398632 | 0,806002996 |
| FBXW7     | 0,374851686  | 5,515445352 | 0,499485691 | 0,806002996 |
| LOC440944 | 0,414301739  | 3,913484663 | 0,499702399 | 0,806002996 |
| NDUFS4    | -0,310031769 | 6,090487051 | 0,499821872 | 0,806002996 |
| FBXO3     | -0,231431477 | 5,448956606 | 0,499846888 | 0,806002996 |
| OGFRL1    | -0,353311326 | 5,471051692 | 0,499887511 | 0,806002996 |
| LENG8     | -0,454608125 | 7,32712363  | 0,500047487 | 0,806002996 |
| KIAA0319L | -0,29069748  | 5,86887883  | 0,50010246  | 0,806002996 |
| TSPO      | -0,323793247 | 6,267314278 | 0,500454396 | 0,806379614 |
| BCL2L13   | 0,405933     | 5,00713457  | 0,500808502 | 0,80675955  |
| KIF3A     | 0,432147555  | 3,327626963 | 0,501156503 | 0,807018091 |
| HNRNPA3   | -0,468683133 | 5,636508978 | 0,50127771  | 0,807018091 |
| EXOSC9    | 0,357867148  | 5,399983587 | 0,501324041 | 0,807018091 |
| DUSP7     | 0,347935018  | 7,273243757 | 0,501629964 | 0,807319973 |
| WBP1      | -0,321950226 | 6,698699318 | 0,501769238 | 0,807353571 |
| PCGF3     | -0,304775895 | 5,148885326 | 0,502041922 | 0,807601761 |
| ITGA4     | -0,288524817 | 6,381948628 | 0,502296931 | 0,807821408 |
| PGD       | 0,479455762  | 8,00387431  | 0,502417254 | 0,807824393 |
| SRGN      | -0,358092465 | 8,869787459 | 0,502549598 | 0,807846702 |
| ZRANB1    | 0,617845288  | 6,684978426 | 0,502914219 | 0,807907627 |

|           |              |             |             |             |
|-----------|--------------|-------------|-------------|-------------|
| FAM127C   | 0,426284458  | 6,143411868 | 0,503004316 | 0,807907627 |
| HNRNPC    | 0,351951684  | 7,863043186 | 0,503027496 | 0,807907627 |
| TLE1      | -0,26471115  | 5,640979911 | 0,503061414 | 0,807907627 |
| BNIP2     | -0,261379366 | 6,116939155 | 0,503498354 | 0,808418949 |
| TNFRSF10B | 0,379839342  | 5,678534943 | 0,503853675 | 0,808518651 |
| PAK2      | 0,338767311  | 6,329327921 | 0,503955938 | 0,808518651 |
| ECH1      | -0,30703848  | 7,232996101 | 0,504310468 | 0,808518651 |
| HCFC1R1   | 0,388836495  | 6,254543578 | 0,504355757 | 0,808518651 |
| UGGT1     | 0,387002943  | 4,931519449 | 0,50446036  | 0,808518651 |
| EXT1      | -0,288292708 | 6,774049608 | 0,504592506 | 0,808518651 |
| SAR1B     | -0,28011474  | 5,222700315 | 0,504604299 | 0,808518651 |
| ATN1      | 0,437097232  | 8,392241138 | 0,504766131 | 0,808518651 |
| TAF8      | -0,281906106 | 4,992661669 | 0,504800222 | 0,808518651 |
| PPP2R1B   | 0,383397984  | 5,133653452 | 0,504849744 | 0,808518651 |
| CBLL1     | 0,353422994  | 5,03126397  | 0,504910635 | 0,808518651 |
| NOC3L     | 0,383995952  | 3,904892909 | 0,505211956 | 0,808518651 |
| THAP1     | 0,394643008  | 6,004924922 | 0,505338758 | 0,808518651 |
| ZNF654    | -0,267329733 | 4,142729655 | 0,505500312 | 0,808518651 |
| APRT      | 0,372973159  | 7,046099897 | 0,505526518 | 0,808518651 |
| ZBTB40    | -0,284873281 | 4,408881849 | 0,505554982 | 0,808518651 |
| FUNDC2    | 0,290746277  | 5,574120294 | 0,505576115 | 0,808518651 |
| MRPS15    | 0,385042498  | 5,873262812 | 0,505846682 | 0,808761671 |
| TNPO3     | 0,323273816  | 6,453162155 | 0,50614888  | 0,809055136 |
| GLUD1     | -0,275368778 | 6,101145109 | 0,506326195 | 0,809148893 |
| QRICH1    | 0,414056567  | 6,119587504 | 0,506942576 | 0,809762193 |
| CLOCK     | 0,287484618  | 5,669662949 | 0,507138725 | 0,809762193 |
| FARSA     | 0,368864038  | 7,314385571 | 0,507178616 | 0,809762193 |
| BAG4      | 0,465826339  | 6,460269365 | 0,507185705 | 0,809762193 |
| CLDND1    | -0,343229931 | 5,686143216 | 0,507360486 | 0,809762193 |
| HEXB      | -0,278985775 | 7,017950451 | 0,507422474 | 0,809762193 |
| ATP6AP1   | -0,282720492 | 7,30632613  | 0,508035357 | 0,810119901 |
| PDLIM7    | 0,435306128  | 7,782475719 | 0,508314885 | 0,810119901 |
| DPH2      | 0,419460911  | 4,782759415 | 0,508324283 | 0,810119901 |
| RANGAP1   | 0,418160686  | 4,969185422 | 0,508394445 | 0,810119901 |
| RPS6KA4   | 0,341206596  | 5,550613443 | 0,508521553 | 0,810119901 |
| SEPHS1    | 0,374575153  | 6,651973417 | 0,508693242 | 0,810119901 |
| TRIP6     | 0,34975039   | 7,253931934 | 0,509069671 | 0,810119901 |
| TEX2      | -0,282418986 | 5,583176441 | 0,5091308   | 0,810119901 |
| UQCRRS1   | 0,357048565  | 7,915659027 | 0,509149141 | 0,810119901 |
| MRPS35    | 0,507436696  | 5,939044758 | 0,509164204 | 0,810119901 |
| TIPARP    | -0,358961297 | 6,426624191 | 0,509527008 | 0,810119901 |
| ZNF395    | -0,29462126  | 5,7192646   | 0,509542781 | 0,810119901 |
| CAMK1     | -0,323261624 | 4,459550142 | 0,509559278 | 0,810119901 |
| CKB       | -0,413854109 | 7,317411242 | 0,509603306 | 0,810119901 |
| PARP10    | 0,399300322  | 6,533488922 | 0,509653808 | 0,810119901 |
| CWC22     | -0,262451418 | 4,536077411 | 0,509671554 | 0,810119901 |
| UBE2W     | 0,327548284  | 5,306989923 | 0,509757673 | 0,810119901 |
| SYNJ1     | -0,258389489 | 3,823812807 | 0,509785085 | 0,810119901 |
| RAP2A     | -0,294950411 | 5,503341482 | 0,510131234 | 0,810295759 |
| MARCH5    | 0,30913054   | 5,738237276 | 0,510193353 | 0,810295759 |

|           |              |             |             |             |
|-----------|--------------|-------------|-------------|-------------|
| ATR       | 0,36782569   | 5,271913047 | 0,510328661 | 0,810295759 |
| TAF6L     | -0,270606654 | 4,537457022 | 0,510371064 | 0,810295759 |
| PIP5K1C   | -0,317109483 | 6,637506024 | 0,510930483 | 0,810543783 |
| CUL1      | 0,342605945  | 6,390636703 | 0,510937219 | 0,810543783 |
| YWHAE     | 0,355471888  | 8,928257971 | 0,510950648 | 0,810543783 |
| ABL1      | -0,245471734 | 6,567703472 | 0,511002746 | 0,810543783 |
| RANBP3    | 0,316044015  | 6,6397017   | 0,511141896 | 0,81057595  |
| MED1      | 0,366789653  | 5,509111834 | 0,511351322 | 0,810678273 |
| ZNF28     | -0,376950778 | 3,736188157 | 0,51144419  | 0,810678273 |
| TCFL5     | 0,407469743  | 3,103516328 | 0,511732739 | 0,81094714  |
| PEF1      | -0,263507345 | 6,076495659 | 0,512101504 | 0,811080486 |
| RELB      | 0,331393896  | 6,237592379 | 0,512119229 | 0,811080486 |
| PRSS23    | 0,498718405  | 6,403727916 | 0,51221005  | 0,811080486 |
| SPARC     | -0,357097638 | 10,99727163 | 0,512332399 | 0,811080486 |
| SLC35A4   | -0,254992834 | 6,300076622 | 0,512411605 | 0,811080486 |
| NEDD4L    | -0,310623948 | 5,870270399 | 0,513701759 | 0,81292737  |
| KATNAL1   | -0,303287594 | 4,291937713 | 0,51381683  | 0,81292737  |
| DCTN2     | 0,280570191  | 7,667145654 | 0,514061836 | 0,813126342 |
| DYNLL2    | -0,241561219 | 6,711837103 | 0,514397892 | 0,813292581 |
| PSMB3     | 0,326480539  | 7,730455894 | 0,51440547  | 0,813292581 |
| RPL9      | 0,346282142  | 6,022413861 | 0,514534004 | 0,813307227 |
| TNFRSF10D | -0,288891573 | 4,220002608 | 0,514674966 | 0,813341505 |
| RPL10A    | -0,247370753 | 9,708635102 | 0,514914746 | 0,813531893 |
| NRF1      | -0,237132612 | 5,078723607 | 0,515239993 | 0,813853464 |
| SEMA4C    | 0,379060341  | 6,855418201 | 0,515371416 | 0,813853464 |
| WDR74     | 0,501108669  | 4,876713344 | 0,515524546 | 0,813853464 |
| OSBPL1A   | -0,272202537 | 6,261770845 | 0,515595683 | 0,813853464 |
| KLHL20    | -0,291672533 | 5,458304934 | 0,515940529 | 0,814209319 |
| C6orf89   | 0,329965357  | 7,198857274 | 0,516359982 | 0,81468272  |
| DIAPH2    | -0,322509415 | 3,469446132 | 0,516918957 | 0,815134829 |
| TTL       | 0,396004274  | 5,618637829 | 0,51693691  | 0,815134829 |
| ZNF37A    | 0,369119231  | 5,118165574 | 0,517005152 | 0,815134829 |
| TRAPPC10  | 0,364811353  | 6,000963589 | 0,517844938 | 0,816258321 |
| PGRMC2    | -0,307543609 | 5,89353892  | 0,517957142 | 0,816258321 |
| PNP       | -0,302612368 | 4,775862448 | 0,518144204 | 0,816364447 |
| CAMTA2    | -0,245005384 | 5,372533666 | 0,518670066 | 0,816866785 |
| EXTL3     | -0,310301746 | 3,716426744 | 0,518702622 | 0,816866785 |
| CDC42EP1  | -0,288067518 | 8,661063633 | 0,518916829 | 0,817015436 |
| PCGF5     | -0,28563304  | 5,853466881 | 0,519044577 | 0,817027925 |
| FKBP1A    | -0,270626524 | 10,53710667 | 0,519525098 | 0,817595579 |
| RAB28     | 0,390765332  | 4,843344284 | 0,519978736 | 0,818087774 |
| TYW3      | 0,457406856  | 5,563989922 | 0,520077798 | 0,818087774 |
| OBSL1     | -0,322710793 | 5,989984305 | 0,52027202  | 0,818204544 |
| CLN3      | -0,244940564 | 6,14976082  | 0,520894134 | 0,818829546 |
| SNTB1     | -0,319868189 | 5,505814453 | 0,520940877 | 0,818829546 |
| GNL1      | 0,371632857  | 5,889549107 | 0,521029682 | 0,818829546 |
| MALT1     | 0,357388348  | 4,865264353 | 0,521276063 | 0,818851658 |
| PPP2R5D   | 0,35841446   | 4,737311587 | 0,52128392  | 0,818851658 |
| RNASSET2  | -0,248338029 | 7,078440344 | 0,521441257 | 0,818910164 |
| C6orf62   | 0,432529027  | 6,713534916 | 0,521814392 | 0,819222691 |



|          |              |             |             |             |
|----------|--------------|-------------|-------------|-------------|
| RPN2     | 0,32393541   | 8,2265502   | 0,521880535 | 0,819222691 |
| ANAPC13  | 0,416561708  | 6,99439842  | 0,522061056 | 0,819317454 |
| CCDC142  | 0,402509321  | 4,541090642 | 0,522868783 | 0,820303084 |
| TNPO2    | -0,288108491 | 5,613254718 | 0,523040683 | 0,820303084 |
| RAP1B    | 0,342820879  | 6,849305803 | 0,523049979 | 0,820303084 |
| HSD17B10 | -0,265540013 | 5,160537683 | 0,523367613 | 0,820525885 |
| ITPA     | 0,455878073  | 4,669087007 | 0,523432703 | 0,820525885 |
| CTCF     | 0,306873624  | 6,226962589 | 0,523698873 | 0,820754451 |
| S100A11  | 0,473930148  | 10,21670716 | 0,523907736 | 0,820794817 |
| WHSC2    | 0,40635074   | 4,878686537 | 0,524074892 | 0,820794817 |
| CELSR2   | 0,579920964  | 3,684250681 | 0,52419195  | 0,820794817 |
| EIF4EBP2 | -0,250256452 | 8,372916826 | 0,524206105 | 0,820794817 |
| AP3S2    | -0,245676714 | 5,069313808 | 0,524463075 | 0,820910583 |
| ATOX1    | 0,324116292  | 7,061696388 | 0,524520811 | 0,820910583 |
| WBP4     | 0,413073228  | 4,189227432 | 0,524999016 | 0,821182066 |
| EXOSC10  | -0,247158185 | 6,800318023 | 0,525153399 | 0,821182066 |
| CPE      | -0,342828589 | 7,188378644 | 0,525330692 | 0,821182066 |
| NUP85    | 0,37949317   | 4,588701195 | 0,525459033 | 0,821182066 |
| PARP6    | 0,44819059   | 6,27527907  | 0,52549167  | 0,821182066 |
| SKAP2    | -0,283066759 | 5,625400479 | 0,525528084 | 0,821182066 |
| ARL6IP5  | -0,312161242 | 7,13689658  | 0,525606039 | 0,821182066 |
| IFNAR1   | -0,276003291 | 5,372071714 | 0,52565768  | 0,821182066 |
| ADPGK    | -0,252603342 | 5,456400828 | 0,526042037 | 0,821420211 |
| NRARP    | -0,352115312 | 7,139043905 | 0,526140845 | 0,821420211 |
| TMEM33   | -0,236525715 | 6,890302044 | 0,526171503 | 0,821420211 |
| ZNF623   | -0,292881121 | 4,445071686 | 0,526669795 | 0,821911372 |
| EGLN2    | 0,508457885  | 6,80328838  | 0,526730503 | 0,821911372 |
| SLC38A6  | 0,354788013  | 6,12227009  | 0,526847721 | 0,821911372 |
| GMFB     | -0,281377318 | 6,473348145 | 0,527221836 | 0,822306884 |
| CLPTM1   | -0,269926799 | 8,083937402 | 0,527649402 | 0,822638365 |
| EIF3L    | -0,236681419 | 8,91641486  | 0,52792883  | 0,822638365 |
| FIS1     | -0,262544738 | 6,786182296 | 0,528013097 | 0,822638365 |
| KIAA1671 | -0,322407947 | 4,58114317  | 0,528048042 | 0,822638365 |
| DAXX     | -0,312933736 | 4,820618895 | 0,528188741 | 0,822638365 |
| LZTS2    | 0,436228093  | 6,829898029 | 0,528195706 | 0,822638365 |
| EPC1     | -0,258927737 | 4,653920126 | 0,528291714 | 0,822638365 |
| RAB5B    | -0,238603716 | 7,93875284  | 0,528447204 | 0,822638365 |
| FAM98B   | 0,40985266   | 4,403935942 | 0,528529502 | 0,822638365 |
| TCP1     | 0,305205376  | 7,111215139 | 0,528640756 | 0,822638365 |
| RAB3GAP2 | 0,291118896  | 5,34179762  | 0,528836663 | 0,822755465 |
| ABHD12   | -0,273622245 | 6,965141005 | 0,529034508 | 0,822875527 |
| FRRS1    | -0,292508983 | 3,716564829 | 0,529293971 | 0,823091354 |
| SUMO1    | -0,271908878 | 3,961123754 | 0,529640509 | 0,823174124 |
| CHMP2A   | -0,271899339 | 7,53116905  | 0,529695835 | 0,823174124 |
| POLR3K   | 0,35346759   | 5,244474411 | 0,529709349 | 0,823174124 |
| SLC41A3  | -0,311931811 | 4,768266053 | 0,530069649 | 0,823546352 |
| ZNF177   | -0,355625944 | 4,530820787 | 0,530341892 | 0,823710827 |
| FBXW2    | -0,237938432 | 6,206816516 | 0,530417106 | 0,823710827 |
| NUCB2    | -0,289696188 | 4,979406412 | 0,530676905 | 0,823801139 |
| TMEM64   | 0,347457292  | 5,747292334 | 0,530821748 | 0,823801139 |

|               |              |             |             |             |
|---------------|--------------|-------------|-------------|-------------|
| MFN2          | 0,305019179  | 7,267245542 | 0,530944361 | 0,823801139 |
| MYO18A        | -0,268967032 | 4,665700117 | 0,531038041 | 0,823801139 |
| NBPF9         | -0,31571557  | 5,975237363 | 0,531132495 | 0,823801139 |
| CASC3         | -0,31388304  | 7,69641356  | 0,531216753 | 0,823801139 |
| SYNM          | -0,372828312 | 5,490912624 | 0,53152348  | 0,823801139 |
| CASP6         | 0,351767131  | 3,841459515 | 0,531575785 | 0,823801139 |
| CSNK1A1       | 0,358146304  | 8,699675426 | 0,531755471 | 0,823801139 |
| BRWD3         | -0,25205682  | 4,032232741 | 0,531792653 | 0,823801139 |
| PGLS          | -0,314398603 | 5,910214375 | 0,531804167 | 0,823801139 |
| SLC2A3        | -0,254231959 | 7,900051468 | 0,532582694 | 0,824670299 |
| GORASP1       | 0,409888401  | 5,25307754  | 0,532607127 | 0,824670299 |
| ZKSCAN1       | 0,386337732  | 7,360194772 | 0,532738535 | 0,824673287 |
| INPP5F        | 0,428481707  | 3,452973497 | 0,532850931 | 0,824673287 |
| LUC7L2        | 0,301892769  | 6,228397467 | 0,533552245 | 0,825571309 |
| PLIN2         | -0,306152985 | 7,187983579 | 0,534125493 | 0,826270811 |
| RPS6KA3       | -0,222086685 | 6,548306015 | 0,534311423 | 0,826370967 |
| DKFZP586I1420 | 0,447095758  | 6,813059177 | 0,534472701 | 0,826428435 |
| IL6ST         | -0,309222102 | 8,0106936   | 0,53459097  | 0,826428435 |
| FBLIM1        | -0,32926438  | 6,663594506 | 0,535139098 | 0,826976932 |
| DNAJC16       | 0,345262797  | 4,831735107 | 0,535196783 | 0,826976932 |
| TMED4         | 0,395933754  | 6,985785138 | 0,535400444 | 0,826976932 |
| HTATSF1       | 0,341564417  | 4,5663582   | 0,535552011 | 0,826976932 |
| TRO           | 0,724349294  | 5,129000708 | 0,535667773 | 0,826976932 |
| OAS3          | 0,435092235  | 5,769432071 | 0,535738556 | 0,826976932 |
| COG8          | -0,250639215 | 5,891029147 | 0,535820033 | 0,826976932 |
| RSAD2         | 0,453375277  | 4,128589663 | 0,535928803 | 0,826976932 |
| GOLGA3        | 0,360464915  | 5,751637147 | 0,536052066 | 0,826976932 |
| HDAC5         | -0,289595535 | 5,93618771  | 0,536200647 | 0,826976932 |
| OSGEPL1       | -0,287059425 | 3,925406084 | 0,536279805 | 0,826976932 |
| GNL2          | 0,317477682  | 6,170942412 | 0,536409274 | 0,826986437 |
| C16orf52      | -0,263742805 | 5,144329796 | 0,536528523 | 0,826986437 |
| JAG2          | 0,488643925  | 5,721636074 | 0,537080316 | 0,827216702 |
| CNN3          | 0,412902639  | 8,47869634  | 0,537095693 | 0,827216702 |
| CD248         | -0,361516706 | 7,191806529 | 0,537143746 | 0,827216702 |
| RARRES3       | -0,374901468 | 7,155937435 | 0,537283219 | 0,827216702 |
| ADIPOR1       | -0,226890765 | 6,404455604 | 0,537284466 | 0,827216702 |
| YAP1          | 0,302903473  | 8,089477727 | 0,537720168 | 0,827655617 |
| FIP1L1        | 0,298100335  | 5,166598393 | 0,537880618 | 0,827655617 |
| PLEKHM2       | -0,293998785 | 6,709794224 | 0,53793367  | 0,827655617 |
| FAM120C       | 0,363465451  | 4,625945585 | 0,538085993 | 0,827703222 |
| FAM108A1      | -0,288184328 | 8,697116935 | 0,538335773 | 0,827786597 |
| DCAF5         | -0,259620173 | 5,405834015 | 0,538382982 | 0,827786597 |
| NEDD1         | 0,367574641  | 4,938620626 | 0,539044203 | 0,827855516 |
| RBX1          | -0,229576014 | 7,174884933 | 0,539114898 | 0,827855516 |
| TRMT12        | 0,425115049  | 5,036549389 | 0,539172179 | 0,827855516 |
| RASA1         | -0,303954695 | 6,888006976 | 0,539208466 | 0,827855516 |
| RAF1          | -0,294104948 | 4,578259913 | 0,539238728 | 0,827855516 |
| UBE2D4        | -0,256917833 | 5,208152511 | 0,539271565 | 0,827855516 |
| DNAJC5        | 0,303857033  | 6,637289726 | 0,539277636 | 0,827855516 |
| NINL          | 0,426542577  | 3,863701064 | 0,540144798 | 0,829000086 |

|           |              |             |             |             |
|-----------|--------------|-------------|-------------|-------------|
| SFMBT1    | -0,265117103 | 3,950725551 | 0,540416645 | 0,829134327 |
| LOC387647 | 0,361723243  | 5,235811912 | 0,540475449 | 0,829134327 |
| HEATR5A   | -0,289623785 | 4,699396601 | 0,540909386 | 0,829332721 |
| MAPK9     | 0,327131281  | 6,113339685 | 0,540957352 | 0,829332721 |
| PSMD3     | 0,360672094  | 7,480541019 | 0,541066071 | 0,829332721 |
| KDM2A     | 0,318755642  | 6,955206295 | 0,541136985 | 0,829332721 |
| SND1      | 0,44254678   | 6,075698656 | 0,541212877 | 0,829332721 |
| CHPF2     | 0,470644864  | 5,568259832 | 0,541358312 | 0,829369204 |
| PDZD8     | 0,382158464  | 5,568859382 | 0,541579037 | 0,829520991 |
| OCIAD1    | 0,349240966  | 6,155447142 | 0,541952376 | 0,82986904  |
| MCFD2     | 0,338305397  | 6,697312177 | 0,542049671 | 0,82986904  |
| VCAN      | 0,545506474  | 6,598308856 | 0,542327249 | 0,830107634 |
| TRIM56    | -0,27123287  | 4,728226219 | 0,542647762 | 0,830411824 |
| RASSF4    | -0,274259807 | 6,671309821 | 0,542947393 | 0,83068393  |
| USF2      | 0,322973979  | 7,651411251 | 0,543500092 | 0,831177144 |
| MRPL38    | -0,216058778 | 6,927084248 | 0,543513548 | 0,831177144 |
| TMEM123   | 0,31832088   | 8,987638181 | 0,543711647 | 0,831293659 |
| ZNF180    | -0,256987793 | 3,022740455 | 0,544411786 | 0,832168143 |
| RPL24     | -0,288912505 | 8,13439531  | 0,544527681 | 0,832168143 |
| ASS1      | -0,277158049 | 5,013632622 | 0,544805136 | 0,832405607 |
| NKAP      | 0,345709651  | 4,796427791 | 0,54523761  | 0,832879763 |
| ARPC5     | -0,225025295 | 8,140213009 | 0,545466645 | 0,833043012 |
| OSGIN2    | -0,278951195 | 4,641249603 | 0,545785634 | 0,833175623 |
| KHNYN     | -0,258059535 | 5,25784033  | 0,545797846 | 0,833175623 |
| HADHB     | -0,238843191 | 7,537660674 | 0,546344406 | 0,8338233   |
| CDYL      | 0,365940799  | 4,703421069 | 0,546953346 | 0,834356357 |
| NDUFB10   | -0,253373163 | 5,144803352 | 0,546994243 | 0,834356357 |
| VASN      | -0,300382213 | 6,118083132 | 0,547176349 | 0,834356357 |
| CLASP1    | -0,278917106 | 6,586530377 | 0,547195361 | 0,834356357 |
| ESYT2     | 0,334873626  | 8,876262091 | 0,547342595 | 0,834356357 |
| EHHADH    | 0,352495049  | 4,104105645 | 0,547427826 | 0,834356357 |
| FAM45A    | 0,340668557  | 5,582480463 | 0,547817105 | 0,834492367 |
| FBXW5     | -0,251840103 | 6,198099632 | 0,548023071 | 0,834492367 |
| GEMIN6    | 0,387612125  | 4,247327932 | 0,548036944 | 0,834492367 |
| RAB4B     | -0,26217261  | 4,880038934 | 0,548075902 | 0,834492367 |
| HIPK2     | 0,411224191  | 7,318306765 | 0,54825324  | 0,834492367 |
| ACPL2     | 0,513077504  | 5,681384712 | 0,548344174 | 0,834492367 |
| FBXL5     | -0,232282331 | 7,762353728 | 0,548373706 | 0,834492367 |
| ACACA     | -0,248469058 | 5,534266066 | 0,548602854 | 0,83465481  |
| OPN3      | -0,344785869 | 6,476412651 | 0,548732559 | 0,83466592  |
| WDR35     | 0,408457527  | 5,72379808  | 0,549580985 | 0,835665338 |
| NGDN      | 0,314794372  | 5,325596504 | 0,549634703 | 0,835665338 |
| SSBP3     | -0,249427039 | 6,837392392 | 0,550045083 | 0,836042145 |
| UBAP2     | 0,289226458  | 6,280996466 | 0,550342949 | 0,836042145 |
| CREB3L1   | -0,322750468 | 4,586512048 | 0,550621912 | 0,836042145 |
| C17orf49  | -0,245291693 | 5,430341792 | 0,550827677 | 0,836042145 |
| KDM4A     | -0,241338131 | 4,675626629 | 0,550877516 | 0,836042145 |
| CNTROB    | 0,59176101   | 5,572601919 | 0,550933675 | 0,836042145 |
| C11orf10  | 0,376689086  | 8,492961912 | 0,550994796 | 0,836042145 |
| TRAF3IP1  | 0,321212108  | 5,544976149 | 0,551073994 | 0,836042145 |

|          |              |             |             |             |
|----------|--------------|-------------|-------------|-------------|
| LAS1L    | 0,349293611  | 5,367598892 | 0,551159048 | 0,836042145 |
| RPS15    | -0,258470924 | 10,48581374 | 0,55119872  | 0,836042145 |
| TIMM13   | 0,41960557   | 5,186768524 | 0,551252417 | 0,836042145 |
| RNF141   | 0,31574291   | 5,477825911 | 0,551353794 | 0,836042145 |
| ETFB     | -0,304928342 | 4,727805191 | 0,551570779 | 0,836099999 |
| PRMT7    | -0,23992246  | 5,417890317 | 0,551672641 | 0,836099999 |
| STK17B   | -0,263179438 | 6,246256889 | 0,551759788 | 0,836099999 |
| ZC3H18   | 0,277803842  | 5,541217458 | 0,552178523 | 0,836284312 |
| TRIM8    | 0,361181227  | 7,964509473 | 0,552194812 | 0,836284312 |
| UBA1     | -0,245447152 | 7,780065259 | 0,552249341 | 0,836284312 |
| ODF2     | 0,302580073  | 4,013519318 | 0,552816229 | 0,836956897 |
| MAPK14   | 0,275907381  | 6,781199516 | 0,553264722 | 0,837449975 |
| FAM198B  | 0,314716806  | 7,022868052 | 0,553393174 | 0,837458512 |
| MED18    | -0,261348835 | 3,998682807 | 0,55383959  | 0,837689491 |
| BCAP29   | 0,344544909  | 7,055549606 | 0,553922276 | 0,837689491 |
| CRELD2   | -0,248727794 | 6,765440902 | 0,553981476 | 0,837689491 |
| CD3G     | 0,589497129  | 5,765245258 | 0,554143069 | 0,837689491 |
| PBXIP1   | -0,277584481 | 6,747584382 | 0,554197135 | 0,837689491 |
| S100A6   | -0,283755286 | 8,174877764 | 0,554451308 | 0,837689491 |
| PMPCA    | -0,274813814 | 4,903396541 | 0,554769995 | 0,837689491 |
| ZNF706   | -0,250343628 | 5,733105943 | 0,554861437 | 0,837689491 |
| SNX8     | 0,396756874  | 5,747081413 | 0,554950674 | 0,837689491 |
| RFT1     | 0,377574736  | 5,573276533 | 0,555066195 | 0,837689491 |
| SDC4     | -0,28943305  | 8,524992567 | 0,555121201 | 0,837689491 |
| MYH9     | -0,250422682 | 9,218479988 | 0,555185929 | 0,837689491 |
| SKIV2L   | 0,400895166  | 3,392372791 | 0,555189425 | 0,837689491 |
| ZNF573   | 0,41484244   | 4,413271556 | 0,555265655 | 0,837689491 |
| LMAN2    | -0,245540758 | 7,169795123 | 0,556684384 | 0,839644064 |
| CD164    | -0,255275074 | 8,357326467 | 0,556988801 | 0,839873855 |
| TRIM41   | 0,395652872  | 4,297142325 | 0,557083069 | 0,839873855 |
| RPL35    | 0,308558511  | 11,3225254  | 0,557250693 | 0,839940866 |
| ORMDL3   | -0,285282576 | 6,434511679 | 0,55758767  | 0,840226066 |
| GAS5     | 0,32593226   | 7,238192615 | 0,557686343 | 0,840226066 |
| ARID5B   | 0,3435683    | 5,846522053 | 0,55788568  | 0,840336143 |
| C1orf174 | 0,289597722  | 4,951554842 | 0,558005874 | 0,840336143 |
| NRBP2    | 0,49337819   | 5,434024656 | 0,558204151 | 0,840449129 |
| SFXN4    | -0,259920961 | 4,463862293 | 0,558356814 | 0,840493403 |
| INO80D   | -0,231790316 | 6,262704999 | 0,55878772  | 0,840694869 |
| LOC93622 | 0,530725803  | 5,209117289 | 0,558794773 | 0,840694869 |
| ECE1     | -0,266417917 | 7,050269888 | 0,558860513 | 0,840694869 |
| NOC2L    | 0,281898284  | 5,876824918 | 0,559079448 | 0,840838719 |
| YPEL5    | -0,259330201 | 7,987607921 | 0,55961867  | 0,841464104 |
| NDUFA4L2 | -0,415290276 | 8,755354331 | 0,560021181 | 0,841883693 |
| ZNF17    | 0,448711918  | 4,868795011 | 0,560257907 | 0,842053927 |
| MAPKAPK2 | -0,234297383 | 6,535319821 | 0,560525174 | 0,842136701 |
| ATXN3    | 0,320963763  | 5,373659641 | 0,560846038 | 0,842136701 |
| PARP11   | -0,272700478 | 4,755065924 | 0,560888617 | 0,842136701 |
| MTHFR    | -0,263569674 | 5,402689589 | 0,56089406  | 0,842136701 |
| TMEM39A  | 0,266505309  | 5,580582565 | 0,560930473 | 0,842136701 |
| FASTKD3  | 0,397270803  | 3,954850523 | 0,561188239 | 0,842338234 |

|          |              |             |             |             |
|----------|--------------|-------------|-------------|-------------|
| SLC35E1  | -0,246125794 | 7,030598603 | 0,561517106 | 0,842646378 |
| HDHD2    | -0,235155802 | 4,960372621 | 0,561829583 | 0,842831103 |
| OTUD4    | 0,399806224  | 6,108857313 | 0,561945158 | 0,842831103 |
| SPATA7   | -0,271124689 | 4,443324611 | 0,562214864 | 0,842831103 |
| ERI1     | 0,382071613  | 5,243988247 | 0,562280828 | 0,842831103 |
| HNRNPM   | 0,293329275  | 7,275923738 | 0,562312307 | 0,842831103 |
| LIX1L    | -0,259197755 | 6,274729544 | 0,562381804 | 0,842831103 |
| SGMS1    | -0,247407683 | 5,718608106 | 0,563015751 | 0,843541809 |
| AMIGO3   | 0,461722584  | 5,776136987 | 0,563103434 | 0,843541809 |
| COX8A    | 0,316316806  | 7,679187823 | 0,563619302 | 0,84412915  |
| PTK2     | -0,249009503 | 6,093975914 | 0,563785949 | 0,844193322 |
| SEC63    | 0,310244224  | 7,175750427 | 0,564082446 | 0,844290685 |
| GFM1     | 0,315335354  | 6,25741541  | 0,564098601 | 0,844290685 |
| ASL      | 0,38769567   | 6,248997428 | 0,564533871 | 0,84461882  |
| MED16    | 0,358818431  | 6,770803891 | 0,564651408 | 0,84461882  |
| KPNA3    | 0,314909246  | 6,463746353 | 0,564724937 | 0,84461882  |
| FYTTD1   | -0,319745404 | 5,600147368 | 0,56487773  | 0,84461882  |
| DCAF10   | 0,285750515  | 5,482482336 | 0,565123935 | 0,84461882  |
| C1orf21  | -0,25211859  | 5,792864922 | 0,565143375 | 0,84461882  |
| SRBD1    | -0,216057152 | 5,444314545 | 0,565252421 | 0,84461882  |
| WDR20    | 0,323146406  | 5,168160214 | 0,56530874  | 0,84461882  |
| PPP1R16A | 0,406628058  | 5,134620181 | 0,565685721 | 0,844863898 |
| MAP2K2   | 0,317956185  | 5,681603825 | 0,56578556  | 0,844863898 |
| RBCK1    | 0,441540381  | 6,335485197 | 0,566040164 | 0,844863898 |
| DBT      | -0,233548804 | 4,017557888 | 0,566058373 | 0,844863898 |
| C9orf91  | -0,278510843 | 5,376358359 | 0,566092265 | 0,844863898 |
| NCOA3    | -0,204516453 | 6,276846276 | 0,566526747 | 0,845327328 |
| TMEM120B | -0,244357345 | 4,535691931 | 0,566905658 | 0,845601237 |
| RASA4    | 0,553551061  | 7,388330017 | 0,566958331 | 0,845601237 |
| TYK2     | 0,298771516  | 7,292514482 | 0,567198454 | 0,845774384 |
| EPS15    | -0,207213305 | 6,682697441 | 0,567690254 | 0,846252767 |
| TRIP4    | -0,206277693 | 4,782378082 | 0,567767475 | 0,846252767 |
| GDE1     | -0,216068371 | 6,06987317  | 0,568059043 | 0,846397024 |
| ANO6     | -0,251504777 | 7,2327921   | 0,568253342 | 0,846397024 |
| EYA3     | 0,370950107  | 6,201046079 | 0,568395162 | 0,846397024 |
| PDLIM5   | -0,258702387 | 6,999533933 | 0,568474884 | 0,846397024 |
| USP21    | 0,29992662   | 4,416448644 | 0,568558416 | 0,846397024 |
| HPS1     | -0,271081647 | 4,837615079 | 0,568608999 | 0,846397024 |
| CUX1     | -0,295742853 | 5,435835564 | 0,568748156 | 0,846419396 |
| PLXNB2   | -0,26263958  | 7,771653039 | 0,569174586 | 0,846869191 |
| TET3     | -0,240574292 | 4,442525015 | 0,569465099 | 0,847000596 |
| NAA25    | 0,305111508  | 5,57156225  | 0,569511326 | 0,847000596 |
| MRPL46   | -0,247005201 | 5,234683813 | 0,570560614 | 0,848211377 |
| RIF1     | 0,331954092  | 6,507046899 | 0,570574217 | 0,848211377 |
| PANX1    | 0,33802529   | 4,604780971 | 0,570700095 | 0,84821359  |
| MGEA5    | -0,210230045 | 7,476993031 | 0,570906399 | 0,848261652 |
| SMG6     | -0,2417073   | 5,076363979 | 0,570981226 | 0,848261652 |
| KLHL2    | 0,302429846  | 5,825043967 | 0,571106339 | 0,848262715 |
| CORO1B   | -0,202383826 | 6,864972182 | 0,571284887 | 0,848343129 |
| LACTB    | 0,333572197  | 5,237094542 | 0,571565477 | 0,848434032 |

|          |              |             |             |             |
|----------|--------------|-------------|-------------|-------------|
| CXorf26  | 0,289736679  | 5,812152912 | 0,571594947 | 0,848434032 |
| SRCAP    | 0,282845205  | 6,860831359 | 0,571792964 | 0,848543247 |
| BRD2     | 0,28456884   | 8,021941127 | 0,572051419 | 0,848742086 |
| SPCS3    | -0,255624665 | 7,012225806 | 0,572432729 | 0,849017876 |
| NCL      | 0,44927508   | 7,538160418 | 0,57260072  | 0,849017876 |
| IER5     | 0,329907351  | 7,262301361 | 0,572610825 | 0,849017876 |
| LGALS1   | 0,406719659  | 9,626098584 | 0,573064523 | 0,849372745 |
| MGC2752  | -0,229656243 | 4,623947786 | 0,573099281 | 0,849372745 |
| GOLGA8B  | -0,350131147 | 6,038439027 | 0,573272554 | 0,849444925 |
| PPHLN1   | 0,360937703  | 4,280159565 | 0,57362841  | 0,849621117 |
| ALKBH3   | -0,240080801 | 3,920288229 | 0,573640655 | 0,849621117 |
| HS2ST1   | 0,316141871  | 6,005143303 | 0,573966916 | 0,849742433 |
| IGF2R    | -0,193004543 | 7,606829216 | 0,573971791 | 0,849742433 |
| POP7     | 0,287531074  | 5,128511871 | 0,574233    | 0,849944612 |
| MRPL40   | 0,314090474  | 5,116766732 | 0,574358757 | 0,84994626  |
| NR2C1    | -0,309096317 | 4,133305022 | 0,574704952 | 0,850122396 |
| EIF2B1   | 0,291290753  | 6,517002809 | 0,574837117 | 0,850122396 |
| NAB1     | 0,331002009  | 6,153092444 | 0,574970109 | 0,850122396 |
| E2F6     | 0,336189425  | 5,210556496 | 0,575020945 | 0,850122396 |
| KLF5     | 0,443514362  | 5,980330952 | 0,575229502 | 0,850122396 |
| TRAFD1   | -0,240445049 | 5,669824346 | 0,575310558 | 0,850122396 |
| SLC16A4  | -0,300559965 | 5,336822561 | 0,575350471 | 0,850122396 |
| ZDHHC8   | 0,347111851  | 5,621386746 | 0,575830595 | 0,850183957 |
| RIC8A    | -0,230884442 | 5,615378318 | 0,575890128 | 0,850183957 |
| EPHA2    | 0,411917894  | 6,524351548 | 0,575905754 | 0,850183957 |
| PFKFB3   | 0,352286884  | 6,894421076 | 0,575941085 | 0,850183957 |
| SLC25A39 | 0,361843066  | 6,620723666 | 0,576479828 | 0,850183957 |
| THADA    | -0,225753122 | 4,574923391 | 0,57658268  | 0,850183957 |
| RASA2    | -0,243773373 | 3,70528688  | 0,576781416 | 0,850183957 |
| EARS2    | 0,364163929  | 4,970319098 | 0,576808067 | 0,850183957 |
| ATP6V1H  | -0,252271415 | 5,035182396 | 0,576883792 | 0,850183957 |
| EPN2     | 0,327352417  | 7,101510192 | 0,576940113 | 0,850183957 |
| ZNF101   | 0,322326929  | 3,855079031 | 0,576965306 | 0,850183957 |
| RNASEH2C | 0,319428034  | 5,666691299 | 0,577161274 | 0,850183957 |
| ARHGAP29 | -0,321183398 | 6,529933108 | 0,577424892 | 0,850183957 |
| COX6C    | -0,267947055 | 6,587442484 | 0,577515768 | 0,850183957 |
| STEAP2   | 0,36614412   | 6,957917393 | 0,577518749 | 0,850183957 |
| SEC22C   | -0,23964063  | 4,339894883 | 0,577773413 | 0,850183957 |
| YTHDC1   | 0,284086214  | 6,840610275 | 0,577789139 | 0,850183957 |
| PTGR2    | 0,361286419  | 4,986099956 | 0,577824005 | 0,850183957 |
| WDR77    | 0,29272508   | 6,245045078 | 0,577840236 | 0,850183957 |
| FSTL1    | 0,45320826   | 9,417595031 | 0,57798425  | 0,850183957 |
| KIAA1586 | 0,451972002  | 5,313615467 | 0,578010386 | 0,850183957 |
| PKD1     | 0,463068062  | 7,937443472 | 0,578148383 | 0,850203542 |
| MAP4K2   | -0,285676075 | 4,553806826 | 0,578340615 | 0,850302858 |
| MAVS     | -0,214637124 | 6,474614681 | 0,578466122 | 0,85030405  |
| SSR2     | -0,254464073 | 7,116520041 | 0,578841494 | 0,850517361 |
| CIC      | -0,231860169 | 7,181874706 | 0,578860694 | 0,850517361 |
| PIGT     | -0,270957714 | 7,112738928 | 0,579244425 | 0,85071635  |
| IMPA1    | 0,282193745  | 5,053724622 | 0,579421856 | 0,85071635  |

|          |              |             |             |             |
|----------|--------------|-------------|-------------|-------------|
| TRUB1    | 0,293609398  | 4,904964557 | 0,57944588  | 0,85071635  |
| POLI     | -0,226622339 | 4,103128871 | 0,579495153 | 0,85071635  |
| DHPS     | 0,340480029  | 5,242671539 | 0,579911875 | 0,851113404 |
| NUDT16L1 | 0,439923201  | 4,290182138 | 0,58001525  | 0,851113404 |
| BLOC1S2  | -0,240133016 | 5,348484427 | 0,580512723 | 0,851660124 |
| SMAD6    | -0,344773101 | 5,806456759 | 0,580809737 | 0,851682879 |
| F8A1     | -0,273019446 | 5,259224815 | 0,580917262 | 0,851682879 |
| C14orf93 | -0,240560696 | 4,321617921 | 0,581103898 | 0,851682879 |
| AGAP6    | -0,26206651  | 5,212960894 | 0,581118341 | 0,851682879 |
| MLLT6    | 0,429108627  | 6,359133063 | 0,581152726 | 0,851682879 |
| ZNF428   | -0,285532917 | 4,633950157 | 0,58132753  | 0,851756    |
| TIMM17A  | 0,343145487  | 5,805153529 | 0,581715656 | 0,85214158  |
| AP4S1    | -0,267209576 | 4,950223166 | 0,581877003 | 0,852158377 |
| CMTM8    | 0,458239895  | 6,173832377 | 0,581977058 | 0,852158377 |
| KIF21A   | 0,385119474  | 3,998838749 | 0,582304967 | 0,852455468 |
| PDPK1    | 0,357434222  | 4,528763262 | 0,582574038 | 0,852547106 |
| MYO10    | -0,246263327 | 6,828017749 | 0,58281935  | 0,852547106 |
| SPINT2   | 0,467621703  | 9,018275692 | 0,58297025  | 0,852547106 |
| TMEM115  | -0,271815059 | 5,739558797 | 0,583013543 | 0,852547106 |
| HERC2    | 0,387920059  | 7,825219037 | 0,58304229  | 0,852547106 |
| ATAD2B   | -0,231818784 | 3,527638618 | 0,583299696 | 0,852547106 |
| TMED1    | 0,370107881  | 5,106445742 | 0,583365101 | 0,852547106 |
| EDF1     | 0,290686407  | 7,506003495 | 0,583521226 | 0,852547106 |
| DBI      | -0,238916336 | 8,340183858 | 0,583596903 | 0,852547106 |
| PRMT2    | -0,24282546  | 4,606740528 | 0,58370894  | 0,852547106 |
| HYI      | -0,225523927 | 6,3097767   | 0,583955703 | 0,852547106 |
| MTHFD1L  | 0,385617412  | 4,584772416 | 0,584044061 | 0,852547106 |
| ANKRD40  | 0,312179902  | 7,147838704 | 0,584095642 | 0,852547106 |
| ULK3     | 0,372874331  | 5,962003046 | 0,584117917 | 0,852547106 |
| LCORL    | 0,348284505  | 5,929660151 | 0,584282288 | 0,85260452  |
| DCAF17   | 0,391983728  | 4,050237392 | 0,584497377 | 0,852637684 |
| NKIRAS1  | 0,394604668  | 3,215725442 | 0,584555092 | 0,852637684 |
| MRPS18A  | 0,333344747  | 5,168955898 | 0,584808722 | 0,852801679 |
| UQCR10   | 0,34795339   | 5,763514469 | 0,584917649 | 0,852801679 |
| SUMF1    | -0,248747777 | 4,988405734 | 0,585145107 | 0,852950938 |
| ZNF318   | 0,299378806  | 4,25412323  | 0,585291722 | 0,852982314 |
| AP2A1    | -0,21550915  | 6,776974541 | 0,585605971 | 0,853257931 |
| IGF1R    | -0,22505048  | 6,680288948 | 0,586009197 | 0,853563187 |
| EIF2B4   | -0,216351739 | 5,139364616 | 0,586089193 | 0,853563187 |
| KIAA0240 | -0,221332788 | 4,83971319  | 0,58631617  | 0,853563187 |
| HS1BP3   | -0,234571503 | 4,463679304 | 0,586380907 | 0,853563187 |
| ZNF280D  | -0,232537264 | 5,336892392 | 0,586441345 | 0,853563187 |
| APBB1    | -0,247222124 | 6,26798429  | 0,586707995 | 0,853631193 |
| TTC8     | 0,328599491  | 3,648909481 | 0,586866695 | 0,853631193 |
| ACAT2    | -0,246002806 | 4,323542962 | 0,587139954 | 0,853631193 |
| C6orf1   | 0,389586295  | 6,575317655 | 0,587144233 | 0,853631193 |
| PIP4K2A  | -0,195865823 | 5,845573789 | 0,587233943 | 0,853631193 |
| RBM3     | 0,308542206  | 8,829712801 | 0,587239174 | 0,853631193 |
| CCDC104  | 0,322067883  | 6,083039579 | 0,587670102 | 0,853888426 |
| COPA     | -0,187217022 | 7,415081994 | 0,587743971 | 0,853888426 |

|           |              |             |             |             |
|-----------|--------------|-------------|-------------|-------------|
| PRPSAP1   | 0,307221451  | 5,355643988 | 0,587791798 | 0,853888426 |
| ARCN1     | -0,197911145 | 8,139090617 | 0,58798677  | 0,853951378 |
| CCT7      | 0,264716828  | 6,363993633 | 0,588085595 | 0,853951378 |
| STX8      | 0,340983373  | 6,291034619 | 0,588335353 | 0,853991955 |
| HIP1      | -0,270541035 | 5,636617889 | 0,588769303 | 0,853991955 |
| HINT2     | -0,271449365 | 5,7654149   | 0,588859486 | 0,853991955 |
| SETD1A    | 0,323202524  | 6,16231425  | 0,589208585 | 0,853991955 |
| PIBF1     | 0,308656241  | 3,494729917 | 0,589300424 | 0,853991955 |
| CALD1     | -0,255897533 | 8,793683104 | 0,589374862 | 0,853991955 |
| COG4      | 0,286404152  | 5,023471695 | 0,589476823 | 0,853991955 |
| GPC4      | -0,332998185 | 5,773361042 | 0,589590432 | 0,853991955 |
| MYO9B     | -0,250922618 | 5,727870032 | 0,589613801 | 0,853991955 |
| GALNT4    | 0,363692225  | 4,698019426 | 0,589637832 | 0,853991955 |
| MRP63     | -0,258620277 | 3,922006674 | 0,589890453 | 0,853991955 |
| PSMD9     | 0,294466307  | 4,844083257 | 0,589911637 | 0,853991955 |
| SNX5      | 0,268738846  | 6,764762952 | 0,590002131 | 0,853991955 |
| LEPROT    | -0,231688144 | 7,846733271 | 0,590011631 | 0,853991955 |
| MAF1      | -0,211617404 | 6,725145035 | 0,59010637  | 0,853991955 |
| ADAMTS12  | 0,434789337  | 5,270231881 | 0,590117333 | 0,853991955 |
| SMC5      | -0,213023564 | 6,218821388 | 0,590336556 | 0,85400123  |
| LOC401397 | 0,351223837  | 6,818103538 | 0,590417682 | 0,85400123  |
| SNRPD3    | 0,270031501  | 7,492869581 | 0,590653539 | 0,85400123  |
| PIGH      | -0,218187606 | 4,957904388 | 0,590683839 | 0,85400123  |
| TRIM24    | -0,229412738 | 5,012328127 | 0,590749934 | 0,85400123  |
| DPH1      | -0,218927496 | 4,745415745 | 0,591121239 | 0,854356873 |
| NDUFS2    | 0,288779028  | 6,682048826 | 0,591414498 | 0,854599589 |
| TMCO1     | 0,236039218  | 7,240230432 | 0,591760462 | 0,85467564  |
| EHBP1L1   | 0,261783686  | 7,86139042  | 0,591829389 | 0,85467564  |
| PLEKHG3   | 0,310148717  | 6,089021665 | 0,59184314  | 0,85467564  |
| RB1CC1    | 0,301494233  | 5,723565883 | 0,592293045 | 0,854974172 |
| NDST2     | -0,216844709 | 6,261083304 | 0,592349256 | 0,854974172 |
| MRPL4     | 0,340712635  | 3,807193676 | 0,59242601  | 0,854974172 |
| ZMYM2     | 0,33685981   | 7,438971073 | 0,592844733 | 0,855397426 |
| INPP5B    | -0,262639487 | 5,144425185 | 0,593592024 | 0,856294481 |
| KIRREL    | 0,31057574   | 6,91599063  | 0,594015166 | 0,85672365  |
| YTHDF2    | -0,205380192 | 6,235174384 | 0,594423006 | 0,857130573 |
| DSEL      | -0,304752444 | 5,360188473 | 0,594594897 | 0,85715278  |
| RBM4      | 0,335326934  | 6,152655801 | 0,594689808 | 0,85715278  |
| NR3C1     | -0,220653885 | 7,21531421  | 0,594848849 | 0,857200824 |
| CRYZL1    | -0,226404555 | 4,835327279 | 0,595295802 | 0,8576295   |
| VPS35     | 0,309046031  | 6,738708026 | 0,595399909 | 0,8576295   |
| DNAJB9    | -0,24815595  | 5,272790834 | 0,595523637 | 0,8576295   |
| GRB10     | -0,258556154 | 7,783520179 | 0,596116906 | 0,858001995 |
| GALNS     | 0,354738967  | 5,633590849 | 0,596117758 | 0,858001995 |
| GABPB2    | 0,292315788  | 4,169035096 | 0,596238102 | 0,858001995 |
| PDIA3     | 0,251207786  | 8,701477934 | 0,596285592 | 0,858001995 |
| C16orf58  | -0,210966513 | 4,227860014 | 0,597097282 | 0,858841422 |
| WDYHV1    | 0,374470936  | 4,093479224 | 0,597250255 | 0,858841422 |
| SWAP70    | 0,281690616  | 6,782879116 | 0,597338072 | 0,858841422 |
| COMMD1    | -0,186324598 | 5,945352193 | 0,597415775 | 0,858841422 |



|           |              |             |             |             |
|-----------|--------------|-------------|-------------|-------------|
| DPH3      | 0,38146552   | 5,202369495 | 0,597514377 | 0,858841422 |
| CSNK1G2   | -0,20835143  | 6,243246858 | 0,597624659 | 0,858841422 |
| NEURL4    | 0,337603485  | 4,386544425 | 0,598107763 | 0,859283483 |
| MAPK8IP3  | 0,414814328  | 5,628003509 | 0,598184293 | 0,859283483 |
| ARF3      | -0,19011961  | 7,698324052 | 0,598691206 | 0,859776444 |
| TTC14     | -0,28243232  | 6,602821231 | 0,598779635 | 0,859776444 |
| IFT122    | -0,2589529   | 5,150970022 | 0,599197323 | 0,860195063 |
| ZNF697    | -0,220423369 | 4,397846519 | 0,599546738 | 0,860515514 |
| FBXO6     | -0,239278167 | 4,604442178 | 0,6005523   | 0,861777384 |
| C8orf59   | -0,239080026 | 5,649850078 | 0,601133355 | 0,862429696 |
| UBE2D1    | 0,348616953  | 6,359273355 | 0,601263416 | 0,862434532 |
| BUD31     | 0,280556402  | 6,069545876 | 0,601389676 | 0,862434532 |
| ERLEC1    | 0,327853499  | 6,340794022 | 0,601594667 | 0,862547105 |
| ANAPC10   | 0,372828302  | 4,98194968  | 0,601908142 | 0,86281514  |
| FOXO3B    | -0,226482388 | 5,115580302 | 0,602331922 | 0,863209453 |
| APOA1BP   | 0,285726281  | 5,942547578 | 0,602674284 | 0,863209453 |
| VPS36     | -0,228739307 | 6,130329031 | 0,602675552 | 0,863209453 |
| TRNAU1AP  | 0,27036934   | 4,38215078  | 0,60270633  | 0,863209453 |
| UTP14C    | -0,223372224 | 4,231369173 | 0,602816163 | 0,863209453 |
| SMU1      | -0,181590076 | 6,607901645 | 0,603172832 | 0,863432109 |
| KDM5A     | 0,252339588  | 6,197747703 | 0,603243764 | 0,863432109 |
| PDE4DIP   | -0,272144006 | 5,61085781  | 0,603459914 | 0,863432109 |
| KCTD10    | -0,219040943 | 5,452920802 | 0,603603606 | 0,863432109 |
| NT5C3L    | -0,25543054  | 5,103371032 | 0,603622631 | 0,863432109 |
| CLIP4     | 0,31070805   | 5,993647558 | 0,603731382 | 0,863432109 |
| PIK3CA    | 0,293482176  | 5,484303494 | 0,604346253 | 0,863535209 |
| ZDHHC4    | 0,321617259  | 5,57514174  | 0,604387508 | 0,863535209 |
| NUP93     | 0,29265765   | 6,004105896 | 0,604423991 | 0,863535209 |
| IGFBP4    | -0,271190925 | 7,978795006 | 0,604439941 | 0,863535209 |
| PPARD     | 0,257370216  | 6,010336419 | 0,60446885  | 0,863535209 |
| ARF5      | 0,339075338  | 6,928600303 | 0,604667326 | 0,863535209 |
| AAMP      | -0,174545058 | 5,458847621 | 0,604689929 | 0,863535209 |
| GTF2F1    | 0,29234753   | 5,77933868  | 0,604820485 | 0,863540805 |
| PHPT1     | 0,362006471  | 7,291624203 | 0,60497706  | 0,86358354  |
| ATP1B1    | -0,245507688 | 7,787145105 | 0,60537868  | 0,863643359 |
| MYCBP2    | -0,199404715 | 6,59636167  | 0,605392431 | 0,863643359 |
| LOC550643 | 0,269311165  | 5,896160373 | 0,605624714 | 0,863643359 |
| ADD3      | 0,473727948  | 5,45791519  | 0,605736095 | 0,863643359 |
| MLL       | -0,237551428 | 6,667209273 | 0,605974632 | 0,863643359 |
| SEPT2     | -0,182013574 | 8,206518985 | 0,606074769 | 0,863643359 |
| AXIN1     | 0,336982609  | 5,53335189  | 0,606238578 | 0,863643359 |
| PLAGL2    | 0,393371274  | 6,000389595 | 0,606267078 | 0,863643359 |
| ATP8B2    | 0,478614467  | 5,795426346 | 0,606306146 | 0,863643359 |
| KCNQ1OT1  | -0,233120591 | 8,762496892 | 0,606536513 | 0,863643359 |
| PCID2     | 0,278810351  | 5,0245091   | 0,606626941 | 0,863643359 |
| GTF3C3    | 0,282703332  | 4,629718582 | 0,606729589 | 0,863643359 |
| HIF1AN    | -0,204193409 | 6,322953619 | 0,606857035 | 0,863643359 |
| CCNG1     | -0,227783405 | 5,78474882  | 0,606866715 | 0,863643359 |
| PRPF18    | 0,362385487  | 4,575309595 | 0,607049296 | 0,863643359 |
| C16orf13  | -0,23293456  | 4,757212222 | 0,607132018 | 0,863643359 |

|          |              |             |             |             |
|----------|--------------|-------------|-------------|-------------|
| SURF4    | -0,202360532 | 7,158605447 | 0,607172058 | 0,863643359 |
| ATXN7L3B | 0,294839508  | 7,526060119 | 0,607300015 | 0,863645214 |
| C7orf60  | 0,348862619  | 4,334401123 | 0,60826805  | 0,864791901 |
| MIA3     | 0,355536637  | 6,072412407 | 0,608578417 | 0,864791901 |
| RPL8     | -0,260680078 | 7,800321247 | 0,608581819 | 0,864791901 |
| BTAF1    | -0,198592241 | 7,076058149 | 0,608613628 | 0,864791901 |
| ARPC4    | -0,177608484 | 7,238795144 | 0,608752431 | 0,864808922 |
| ZNF625   | 0,401973734  | 3,41079821  | 0,609030636 | 0,865023934 |
| GAN      | 0,387645061  | 5,010743722 | 0,609421741 | 0,865399177 |
| NOP2     | 0,375667388  | 4,99499411  | 0,609847619 | 0,865723438 |
| PITPNC1  | -0,204624073 | 5,298741665 | 0,609994496 | 0,865723438 |
| RABGAP1  | 0,341525296  | 5,354348652 | 0,610070136 | 0,865723438 |
| ZNF581   | 0,299049469  | 5,658299488 | 0,610157918 | 0,865723438 |
| TK2      | -0,214518259 | 5,270854234 | 0,61062621  | 0,86620764  |
| HARS2    | 0,318166572  | 4,166954368 | 0,610761426 | 0,866219252 |
| WASL     | -0,196555496 | 5,486461067 | 0,610995754 | 0,866371396 |
| ZNF410   | 0,269905325  | 5,881918435 | 0,611683002 | 0,86716557  |
| CEP192   | -0,230429887 | 5,281114747 | 0,612084906 | 0,867292218 |
| SLC10A3  | 0,301348359  | 5,74806256  | 0,612108683 | 0,867292218 |
| GATAD2A  | 0,283674027  | 7,711230669 | 0,612268193 | 0,867292218 |
| MARS     | 0,225158311  | 7,568261253 | 0,612295226 | 0,867292218 |
| ZNF81    | 0,363355143  | 4,231705657 | 0,612408276 | 0,867292218 |
| ABCD3    | 0,280404562  | 6,270470007 | 0,612623375 | 0,867416694 |
| HOOK2    | -0,222189202 | 4,944493628 | 0,612782124 | 0,867461346 |
| BRWD1    | -0,21035397  | 6,079935773 | 0,613576727 | 0,868381969 |
| TATDN3   | -0,235717362 | 4,759689262 | 0,613718582 | 0,868381969 |
| ARMC7    | -0,258154749 | 4,577582695 | 0,613932183 | 0,868381969 |
| PPM1K    | -0,243591523 | 5,149026955 | 0,613941849 | 0,868381969 |
| UCKL1    | -0,199771189 | 5,93821256  | 0,6141224   | 0,868402888 |
| MAT2B    | -0,184814432 | 7,304630332 | 0,61421134  | 0,868402888 |
| AMFR     | -0,187572474 | 6,381533645 | 0,61440393  | 0,868495107 |
| PEX26    | -0,209097892 | 5,435561142 | 0,614985268 | 0,869080982 |
| WASF1    | 0,332343907  | 4,629929202 | 0,615073298 | 0,869080982 |
| RWDD2B   | -0,220769083 | 3,001256374 | 0,615285858 | 0,869095769 |
| ZSCAN29  | 0,332914312  | 4,026353984 | 0,615503682 | 0,869095769 |
| YTHDF3   | -0,190658637 | 4,831149426 | 0,615512052 | 0,869095769 |
| TRIM47   | -0,190797558 | 3,790391591 | 0,615593571 | 0,869095769 |
| RPS8     | 0,250338708  | 11,09305345 | 0,615837836 | 0,869260651 |
| PIN1     | -0,211310798 | 5,235157074 | 0,616268608 | 0,869369994 |
| MRPL50   | 0,258055901  | 6,369486496 | 0,616273217 | 0,869369994 |
| AUP1     | 0,226907024  | 7,803817494 | 0,616628104 | 0,869369994 |
| DCAF12   | -0,229829869 | 4,801197529 | 0,616739159 | 0,869369994 |
| YY1      | 0,239170775  | 7,866492782 | 0,61674713  | 0,869369994 |
| NUDT15   | 0,253598156  | 4,561557901 | 0,616787349 | 0,869369994 |
| SETD2    | -0,22739381  | 6,647825702 | 0,616853128 | 0,869369994 |
| GIT2     | -0,191924124 | 4,763371909 | 0,61693524  | 0,869369994 |
| GIPC1    | 0,306818927  | 6,049007179 | 0,617208482 | 0,869460857 |
| NAA10    | 0,320189793  | 5,476098141 | 0,617321935 | 0,869460857 |
| RAB3D    | -0,235102254 | 5,406607143 | 0,617475505 | 0,869460857 |
| FPGS     | -0,186649046 | 6,217102369 | 0,617612769 | 0,869460857 |

|          |              |             |             |             |
|----------|--------------|-------------|-------------|-------------|
| SGK3     | -0,212285816 | 4,2341357   | 0,617883806 | 0,869460857 |
| LRR8D    | 0,320191081  | 4,882630095 | 0,618199275 | 0,869460857 |
| ZNF154   | 0,387372028  | 4,092350419 | 0,618242862 | 0,869460857 |
| TMEM87B  | -0,2551786   | 5,586711693 | 0,618277906 | 0,869460857 |
| PRMT3    | 0,264130238  | 4,780289398 | 0,618301735 | 0,869460857 |
| LEMD2    | 0,250014347  | 5,460622578 | 0,618392536 | 0,869460857 |
| PSMB6    | 0,296286919  | 6,950703236 | 0,618761478 | 0,869460857 |
| SEPT8    | -0,21289865  | 6,224447441 | 0,618789795 | 0,869460857 |
| UROD     | -0,190374642 | 5,123782771 | 0,618859114 | 0,869460857 |
| MLX      | -0,183786906 | 5,896294016 | 0,61907669  | 0,869460857 |
| THY1     | -0,331092463 | 8,014824655 | 0,619107491 | 0,869460857 |
| EVI5L    | -0,23607591  | 4,843226906 | 0,619141258 | 0,869460857 |
| WAC      | -0,212834815 | 8,207196866 | 0,619167315 | 0,869460857 |
| BCL7B    | 0,26103758   | 6,078603691 | 0,619457322 | 0,869641815 |
| CCNT1    | -0,21405578  | 5,002739651 | 0,619551245 | 0,869641815 |
| DRAM2    | -0,226485562 | 4,427362227 | 0,619822415 | 0,869843393 |
| ARPC2    | 0,239530942  | 10,15924256 | 0,620227781 | 0,870066752 |
| NDUFA5   | 0,292266038  | 6,191501596 | 0,620236762 | 0,870066752 |
| LRR47    | -0,195073074 | 5,724501428 | 0,620683363 | 0,87037557  |
| BOK      | 0,34842818   | 4,136408378 | 0,620712186 | 0,87037557  |
| DYNLT3   | 0,380182377  | 6,40280717  | 0,62092666  | 0,870497306 |
| C17orf62 | 0,337997206  | 5,687037114 | 0,621112545 | 0,870578919 |
| WDR11    | -0,193599661 | 6,062106942 | 0,621538573 | 0,870692485 |
| GBA      | 0,233272019  | 6,324000893 | 0,621565717 | 0,870692485 |
| DPY19L3  | -0,23313029  | 6,108538261 | 0,621576626 | 0,870692485 |
| COPZ1    | -0,181723407 | 6,61172137  | 0,621963078 | 0,870749963 |
| EFHD2    | 0,332247719  | 8,195865346 | 0,622072715 | 0,870749963 |
| ITFG3    | -0,184155596 | 6,881421637 | 0,622076416 | 0,870749963 |
| NEO1     | 0,388697117  | 7,312918436 | 0,622128438 | 0,870749963 |
| PATZ1    | -0,248059782 | 4,083629361 | 0,622448263 | 0,870777116 |
| RGS1     | -0,265261097 | 7,113804444 | 0,622463814 | 0,870777116 |
| C1orf131 | 0,400786154  | 4,161810771 | 0,62255091  | 0,870777116 |
| YIPF3    | 0,273963989  | 8,120944645 | 0,622658633 | 0,870777116 |
| RASA3    | 0,295117969  | 5,394748274 | 0,623087423 | 0,8711981   |
| ACTB     | -0,2086504   | 13,33320356 | 0,623354131 | 0,87124911  |
| TSC22D4  | -0,185608887 | 6,281520044 | 0,623379441 | 0,87124911  |
| NUTF2    | 0,24137814   | 7,151370323 | 0,623707109 | 0,871528438 |
| SRF      | -0,195011862 | 6,733733393 | 0,624046371 | 0,871556253 |
| MSH5     | 0,308211043  | 4,927480755 | 0,624079332 | 0,871556253 |
| PAIP2    | -0,192671408 | 5,956866259 | 0,624203186 | 0,871556253 |
| VAC14    | 0,253026995  | 6,822735446 | 0,62434361  | 0,871556253 |
| PIK3C3   | -0,176012018 | 4,409129225 | 0,624373795 | 0,871556253 |
| FAM129B  | 0,289469305  | 7,857144162 | 0,624581891 | 0,871556253 |
| GNB2L1   | 0,284692812  | 11,01028335 | 0,624621705 | 0,871556253 |
| DNMT1    | -0,244632329 | 5,245522327 | 0,625073048 | 0,871749046 |
| DCPS     | 0,29596345   | 5,979848232 | 0,625128529 | 0,871749046 |
| TSEN54   | 0,309939903  | 5,09337124  | 0,62526832  | 0,871749046 |
| FLAD1    | 0,324408476  | 3,667109841 | 0,62527124  | 0,871749046 |
| TSPYL4   | -0,20611665  | 5,191365739 | 0,625634486 | 0,871957605 |
| NT5DC2   | 0,321120253  | 7,581295605 | 0,625676575 | 0,871957605 |

|           |              |             |             |             |
|-----------|--------------|-------------|-------------|-------------|
| SDHB      | -0,21494361  | 3,663028975 | 0,626192649 | 0,872498503 |
| GFER      | 0,247005571  | 4,998924306 | 0,626433197 | 0,872655357 |
| PCYT1A    | 0,333752502  | 5,974750715 | 0,627156273 | 0,873258257 |
| FLCN      | -0,264264493 | 4,792446382 | 0,62729838  | 0,873258257 |
| LRRFIP1   | 0,33805601   | 7,887191915 | 0,627353012 | 0,873258257 |
| SAMD1     | 0,280052337  | 5,259589012 | 0,627378237 | 0,873258257 |
| CMTM6     | 0,272545734  | 6,592754709 | 0,627551484 | 0,873321136 |
| TEX261    | 0,293500626  | 7,089343705 | 0,627838613 | 0,873483893 |
| HNRNPA2B1 | 0,269218919  | 9,753947716 | 0,6281792   | 0,873483893 |
| WDR5B     | 0,364488802  | 6,133016512 | 0,628230917 | 0,873483893 |
| PSMG4     | -0,194684338 | 5,664769761 | 0,628328794 | 0,873483893 |
| RCOR1     | 0,231563932  | 6,331966422 | 0,628464452 | 0,873483893 |
| TSFM      | 0,27689351   | 3,468084773 | 0,628544244 | 0,873483893 |
| ABCC1     | 0,34322036   | 6,810267589 | 0,628641995 | 0,873483893 |
| NDOR1     | 0,405994304  | 4,335777902 | 0,628723202 | 0,873483893 |
| KANK1     | -0,268800628 | 5,491778877 | 0,628821298 | 0,873483893 |
| AKAP8L    | -0,195002276 | 5,467289394 | 0,629106719 | 0,873702387 |
| EXOGL     | 0,333723855  | 4,200062241 | 0,629483239 | 0,873941017 |
| KLHL24    | -0,246530839 | 5,234842237 | 0,629563058 | 0,873941017 |
| NRD1      | 0,251213678  | 5,687567788 | 0,629663033 | 0,873941017 |
| TYW1      | -0,191949605 | 4,191646377 | 0,629819097 | 0,873979736 |
| KCTD2     | -0,174961924 | 5,218059843 | 0,630076351 | 0,874079419 |
| RBBP4     | 0,25858883   | 7,550230037 | 0,630147298 | 0,874079419 |
| FMNL1     | -0,199090844 | 5,469323462 | 0,63135754  | 0,875580042 |
| NHLRC2    | -0,197674354 | 4,36173493  | 0,6321797   | 0,876528283 |
| IDE       | 0,302322212  | 5,62843577  | 0,632298376 | 0,876528283 |
| MEGF9     | -0,24526331  | 6,351209946 | 0,632430192 | 0,876532821 |
| ADH5      | -0,178769505 | 7,621676665 | 0,632828071 | 0,876906038 |
| OGDH      | -0,224015354 | 5,83695048  | 0,633136725 | 0,877155491 |
| PARK7     | 0,206399006  | 8,158021054 | 0,633895607 | 0,87789243  |
| FBXL18    | 0,336430349  | 5,404397224 | 0,634150853 | 0,87789243  |
| NAP1L4    | 0,294934665  | 6,375077025 | 0,634183329 | 0,87789243  |
| MCCC2     | -0,162675871 | 6,041608095 | 0,634183621 | 0,87789243  |
| TUT1      | 0,274899113  | 6,492921111 | 0,634597771 | 0,878287437 |
| HERC1     | -0,201828522 | 5,779708228 | 0,635034922 | 0,878629387 |
| BNIP3L    | -0,214110315 | 8,263126931 | 0,635102544 | 0,878629387 |
| C2orf69   | 0,338979507  | 4,760472007 | 0,635270549 | 0,878668838 |
| ZMYM4     | -0,197054923 | 7,101908942 | 0,635388773 | 0,878668838 |
| TATDN2    | 0,289873982  | 6,104865277 | 0,636053032 | 0,879409088 |
| SELT      | -0,227826709 | 5,830541828 | 0,636534491 | 0,879820996 |
| JAG1      | 0,47655393   | 6,441963319 | 0,636634033 | 0,879820996 |
| TRAF4     | 0,289674452  | 5,609765092 | 0,63676184  | 0,879820996 |
| WSB1      | -0,196898251 | 5,588462054 | 0,636876125 | 0,879820996 |
| CCDC25    | 0,292833687  | 4,990797668 | 0,636996078 | 0,879820996 |
| FNBP1     | 0,289832221  | 6,267512208 | 0,637206563 | 0,879933486 |
| XPNPEP1   | -0,192226626 | 4,758220257 | 0,637575366 | 0,880208926 |
| HEATR1    | 0,284765358  | 5,472830513 | 0,637664188 | 0,880208926 |
| UBE2A     | 0,289204585  | 6,334716392 | 0,638083937 | 0,880610072 |
| SPOPL     | 0,327471168  | 5,061240256 | 0,638300419 | 0,880612105 |
| MKNK2     | -0,217945258 | 7,713594955 | 0,63836277  | 0,880612105 |

|          |              |             |             |             |
|----------|--------------|-------------|-------------|-------------|
| UQCRC2   | 0,211598382  | 6,21022309  | 0,638472833 | 0,880612105 |
| ZNF430   | 0,346506861  | 5,193239016 | 0,639011001 | 0,881176141 |
| STK19    | 0,33287776   | 4,688852088 | 0,63925246  | 0,881312083 |
| RPS6KB2  | 0,264328568  | 4,551726045 | 0,639477216 | 0,881312083 |
| TTC28    | -0,225519706 | 4,580240984 | 0,639553632 | 0,881312083 |
| OR2A9P   | -0,254588176 | 4,393631349 | 0,639626558 | 0,881312083 |
| FANCF    | 0,379145404  | 4,383577085 | 0,639837253 | 0,881424289 |
| FBXL20   | -0,196773274 | 4,601481509 | 0,64027503  | 0,88171923  |
| RBM42    | -0,214447612 | 6,007509646 | 0,640340202 | 0,88171923  |
| RAB1B    | 0,254352396  | 7,692083683 | 0,640463098 | 0,88171923  |
| ANXA1    | -0,20939638  | 9,05259062  | 0,64060706  | 0,88171923  |
| SNX18    | -0,206364114 | 5,808198868 | 0,640697872 | 0,88171923  |
| KPNA6    | 0,223201753  | 6,430778194 | 0,640877958 | 0,881789104 |
| IDH3A    | -0,17424102  | 5,442843944 | 0,641363147 | 0,882208428 |
| TRIM14   | -0,208455998 | 5,814741259 | 0,64144147  | 0,882208428 |
| NUFIP2   | -0,159286877 | 6,703646495 | 0,642045126 | 0,882724879 |
| TGFBR1   | -0,199421609 | 5,947235633 | 0,642075876 | 0,882724879 |
| TAF1C    | 0,342436115  | 3,88328864  | 0,642298743 | 0,882840322 |
| CCNT2    | 0,233164635  | 4,637340881 | 0,642418782 | 0,882840322 |
| KIAA1143 | 0,289791256  | 6,904310702 | 0,642944028 | 0,882876303 |
| TRIAP1   | 0,296123215  | 4,392979686 | 0,643030522 | 0,882876303 |
| STARD3   | -0,179845362 | 6,701204127 | 0,643173988 | 0,882876303 |
| FAM82B   | 0,43236713   | 6,05213489  | 0,643432421 | 0,882876303 |
| CTBP2    | -0,209935986 | 3,960404969 | 0,64343425  | 0,882876303 |
| RRP8     | 0,300963939  | 3,580141317 | 0,643473181 | 0,882876303 |
| SAP130   | 0,206402504  | 6,082660224 | 0,643523254 | 0,882876303 |
| NT5C2    | 0,296952531  | 7,111671068 | 0,643888701 | 0,882876303 |
| NDUFS1   | 0,227328073  | 5,842922498 | 0,643916633 | 0,882876303 |
| CCDC12   | -0,177344069 | 5,338706188 | 0,643942385 | 0,882876303 |
| DNASE1L1 | 0,277678416  | 5,029522493 | 0,643943121 | 0,882876303 |
| DOLK     | 0,251788422  | 4,663052618 | 0,644038948 | 0,882876303 |
| KIFAP3   | -0,227850915 | 4,325109247 | 0,644327835 | 0,882876303 |
| SLC35A5  | -0,196330107 | 5,256176645 | 0,644479498 | 0,882876303 |
| USP37    | 0,235656069  | 5,484161745 | 0,644529076 | 0,882876303 |
| ADSL     | -0,191888434 | 5,524367079 | 0,644585054 | 0,882876303 |
| MTX1     | 0,300606041  | 4,459770981 | 0,644646005 | 0,882876303 |
| VAMP3    | -0,177955243 | 6,131505694 | 0,64486434  | 0,882997978 |
| GALNT10  | 0,272919828  | 6,302209113 | 0,645068182 | 0,883099765 |
| C7orf31  | 0,267432049  | 4,255412312 | 0,645455994 | 0,883284107 |
| DDX50    | -0,186746609 | 4,080555333 | 0,645471625 | 0,883284107 |
| ZNF445   | -0,188193539 | 4,31132054  | 0,645591434 | 0,883284107 |
| ATG7     | 0,251295103  | 4,602874073 | 0,64591783  | 0,883510094 |
| PHKA2    | -0,217366263 | 4,780418194 | 0,64601574  | 0,883510094 |
| ERBB2IP  | 0,262116233  | 6,79675532  | 0,646547626 | 0,883947461 |
| RAB35    | -0,185223537 | 6,854818061 | 0,646594799 | 0,883947461 |
| DDX59    | 0,210173928  | 5,299075341 | 0,646751025 | 0,883983812 |
| RCAN1    | 0,265343296  | 5,021767943 | 0,647253235 | 0,884382045 |
| PEPD     | -0,193414739 | 6,495459932 | 0,647404082 | 0,884382045 |
| USP34    | 0,22556422   | 5,033977216 | 0,647431467 | 0,884382045 |
| SIN3B    | -0,247899729 | 5,93710552  | 0,647754434 | 0,88454351  |

|          |              |             |             |             |
|----------|--------------|-------------|-------------|-------------|
| GLIS2    | -0,207100178 | 5,644325654 | 0,647824177 | 0,88454351  |
| RNFT1    | 0,320394809  | 4,518371872 | 0,648010904 | 0,88454351  |
| MDFIC    | -0,174755225 | 6,311510352 | 0,648100126 | 0,88454351  |
| CCS      | 0,290363042  | 5,290576419 | 0,648397266 | 0,88454351  |
| MKRN1    | 0,262106538  | 6,620518483 | 0,648642153 | 0,88454351  |
| MARCKSL1 | -0,213968528 | 5,905475134 | 0,648724762 | 0,88454351  |
| FBXO28   | 0,31550709   | 5,277510095 | 0,648886684 | 0,88454351  |
| ADAM15   | 0,259998111  | 6,409006119 | 0,648894677 | 0,88454351  |
| DDX49    | 0,344296354  | 5,191013714 | 0,648971767 | 0,88454351  |
| OTUD5    | 0,313934772  | 6,339533617 | 0,649063554 | 0,88454351  |
| ASTE1    | 0,313061541  | 3,378306682 | 0,64910628  | 0,88454351  |
| CREBBP   | 0,295427347  | 5,428068884 | 0,6494603   | 0,884801682 |
| ARID2    | 0,248072848  | 5,133330153 | 0,649555246 | 0,884801682 |
| SKIV2L2  | 0,233993453  | 5,99864624  | 0,649745982 | 0,884884731 |
| HNRNPU   | 0,229325552  | 9,279674191 | 0,649972567 | 0,885016561 |
| RNF138   | 0,25356887   | 5,509592318 | 0,650117571 | 0,885037276 |
| FNDC3A   | 0,279064293  | 6,620411421 | 0,651172594 | 0,88613085  |
| C21orf91 | 0,246052756  | 5,515655661 | 0,651180773 | 0,88613085  |
| TGFB1    | 0,313550472  | 7,824346342 | 0,651672955 | 0,88662368  |
| TNIK     | -0,209129746 | 4,905707481 | 0,651809975 | 0,886633197 |
| NDUFV3   | 0,258459188  | 6,139060693 | 0,652121789 | 0,886880431 |
| NHP2L1   | -0,186309492 | 6,828175835 | 0,652835824 | 0,887674474 |
| APIP     | 0,259682076  | 6,198929015 | 0,653471862 | 0,888362167 |
| KLHL23   | 0,409779069  | 5,390101863 | 0,653972024 | 0,888864906 |
| PCBP4    | 0,266841225  | 4,659374295 | 0,654406856 | 0,889278667 |
| NOTCH2NL | 0,308568417  | 6,495769553 | 0,654713791 | 0,889437294 |
| MRPS27   | 0,22845024   | 5,896386507 | 0,654784458 | 0,889437294 |
| LPCAT2   | -0,199443803 | 5,105290842 | 0,655126528 | 0,889724715 |
| RGPD6    | -0,167224887 | 3,917377521 | 0,65545666  | 0,889995812 |
| ARMCX3   | 0,239812489  | 5,409321731 | 0,656411082 | 0,891114308 |
| NSFL1C   | 0,270500831  | 6,283261693 | 0,656657686 | 0,891271648 |
| ERI3     | -0,173706848 | 4,498804394 | 0,657347262 | 0,891927777 |
| XAB2     | -0,162961442 | 6,069282981 | 0,657402699 | 0,891927777 |
| DSTYK    | 0,273536726  | 4,001677021 | 0,65766477  | 0,8920843   |
| MAPKBP1  | -0,22152484  | 4,376904836 | 0,657779713 | 0,8920843   |
| SHMT1    | 0,279745543  | 4,679035826 | 0,657944962 | 0,89213098  |
| CHORDC1  | 0,299497299  | 4,915695144 | 0,658118773 | 0,892170382 |
| DOCK5    | 0,324548885  | 4,767764256 | 0,658235693 | 0,892170382 |
| NRP2     | 0,351799986  | 7,312809289 | 0,658627122 | 0,892523518 |
| POLR2A   | -0,169203483 | 8,055371366 | 0,658786181 | 0,892561687 |
| NDUFAB1  | 0,233216286  | 7,690823625 | 0,659062488 | 0,892758662 |
| RNF5     | 0,249574131  | 6,764401523 | 0,659345343 | 0,892850844 |
| AXL      | -0,202322268 | 4,66418994  | 0,65943996  | 0,892850844 |
| FAM129A  | -0,216345545 | 6,611358736 | 0,659635502 | 0,892850844 |
| TCEAL3   | 0,236120574  | 5,493352799 | 0,659891236 | 0,892850844 |
| UBE2Q1   | 0,218723839  | 6,529429023 | 0,660092691 | 0,892850844 |
| C17orf59 | 0,270139076  | 4,851982502 | 0,660118318 | 0,892850844 |
| RNF130   | -0,15847911  | 7,972814537 | 0,660227217 | 0,892850844 |
| GPR108   | -0,18006454  | 5,89049479  | 0,660389288 | 0,892850844 |
| OSTF1    | -0,195990523 | 6,196317987 | 0,660551983 | 0,892850844 |

|              |              |             |             |             |
|--------------|--------------|-------------|-------------|-------------|
| BRD4         | 0,226712439  | 8,029298471 | 0,660669071 | 0,892850844 |
| SHOC2        | 0,28710357   | 6,41148211  | 0,660808203 | 0,892850844 |
| FNBP1L       | -0,180443844 | 3,775658239 | 0,660825081 | 0,892850844 |
| VASP         | 0,324766501  | 4,792477551 | 0,660892004 | 0,892850844 |
| LOC100132832 | -0,196240177 | 6,305101071 | 0,661058064 | 0,892850844 |
| DYNLL1       | 0,219052039  | 8,570175391 | 0,661357936 | 0,892850844 |
| EIF3K        | 0,334267492  | 8,066098091 | 0,661655826 | 0,892850844 |
| ARFIP2       | -0,19228425  | 4,587642189 | 0,66172007  | 0,892850844 |
| PCBD1        | -0,212612085 | 6,359330829 | 0,661738838 | 0,892850844 |
| TMEM147      | 0,381292185  | 6,360998825 | 0,6619904   | 0,892850844 |
| RPS19BP1     | 0,258644968  | 6,300584652 | 0,662061213 | 0,892850844 |
| AGPAT1       | -0,192651431 | 6,993188546 | 0,662102876 | 0,892850844 |
| DUSP10       | -0,180189538 | 5,185243421 | 0,662173042 | 0,892850844 |
| AIMP1        | 0,190252318  | 5,38125269  | 0,662219282 | 0,892850844 |
| CSNK2A1      | 0,210731865  | 7,277863366 | 0,662272998 | 0,892850844 |
| HSPA5        | 0,229526515  | 8,989884661 | 0,662672625 | 0,893100989 |
| MYO7A        | 0,3148686    | 4,182271378 | 0,662720487 | 0,893100989 |
| NAE1         | 0,257174606  | 4,692294535 | 0,663021874 | 0,893192875 |
| CLPP         | 0,263992841  | 4,394568276 | 0,663145523 | 0,893192875 |
| DAAM1        | -0,172646765 | 6,637155525 | 0,663181629 | 0,893192875 |
| IL32         | -0,233219625 | 8,60527887  | 0,663518921 | 0,893378597 |
| LMBR1L       | 0,292720847  | 5,504252895 | 0,663581551 | 0,893378597 |
| ATP1A1       | -0,173833217 | 9,625629666 | 0,664236813 | 0,894072555 |
| UTP15        | 0,27600931   | 4,571978993 | 0,664359237 | 0,894072555 |
| LMTK2        | 0,203574489  | 4,994980395 | 0,66504489  | 0,894667249 |
| DHX38        | -0,186907415 | 5,469376312 | 0,665211281 | 0,894667249 |
| CRIP1        | -0,172651044 | 4,502129652 | 0,665228126 | 0,894667249 |
| DDX20        | 0,247860049  | 5,240055172 | 0,665325945 | 0,894667249 |
| DIP2B        | -0,195779089 | 4,155026955 | 0,665536328 | 0,894773702 |
| MEIS2        | 0,38161647   | 6,140120067 | 0,665975634 | 0,894959229 |
| ZNF768       | 0,247593912  | 4,372160895 | 0,666086072 | 0,894959229 |
| CDKN2D       | -0,185672336 | 5,350289276 | 0,666458024 | 0,894959229 |
| C12orf49     | -0,190881435 | 5,695028987 | 0,666513526 | 0,894959229 |
| RBM14        | -0,186689093 | 5,320177095 | 0,666673959 | 0,894959229 |
| ANAPC16      | -0,185142858 | 6,56104701  | 0,666725068 | 0,894959229 |
| ARFGEF2      | 0,227439357  | 5,6782718   | 0,666785486 | 0,894959229 |
| VHL          | -0,179092211 | 6,259416183 | 0,666854049 | 0,894959229 |
| NTAN1        | 0,246197906  | 5,554039111 | 0,667237191 | 0,894959229 |
| PIM2         | -0,246800494 | 7,164893602 | 0,667285287 | 0,894959229 |
| STK39        | 0,300295565  | 5,607351913 | 0,667313208 | 0,894959229 |
| BST2         | -0,199849689 | 8,193536342 | 0,667348183 | 0,894959229 |
| PARP4        | 0,233836106  | 6,763551007 | 0,667382641 | 0,894959229 |
| DYNLT1       | -0,17639983  | 6,870057759 | 0,667511753 | 0,894959229 |
| PPIG         | 0,237102114  | 5,935404909 | 0,667755677 | 0,895110273 |
| USE1         | -0,17212219  | 5,978875431 | 0,668657398 | 0,896142845 |
| ALG12        | -0,205843761 | 4,838248021 | 0,668877862 | 0,896262161 |
| CLDN4        | -0,208447089 | 5,927877372 | 0,669107977 | 0,89639436  |
| SLC25A44     | -0,184968203 | 4,508527243 | 0,669946903 | 0,897341963 |
| PHF1         | 0,235308467  | 6,678749258 | 0,670720426 | 0,898159512 |
| SLC39A3      | -0,172991788 | 5,871774171 | 0,670832936 | 0,898159512 |

|            |              |             |             |             |
|------------|--------------|-------------|-------------|-------------|
| SUMF2      | -0,171614808 | 6,437440038 | 0,671065346 | 0,898159512 |
| C1orf122   | 0,244521257  | 5,754225135 | 0,671084135 | 0,898159512 |
| ZNF143     | -0,19895344  | 3,920609552 | 0,67190392  | 0,899080226 |
| ANXA11     | -0,165032891 | 7,9852251   | 0,672169656 | 0,899191476 |
| ZHX1       | 0,443754189  | 5,048234941 | 0,67226807  | 0,899191476 |
| RFX7       | 0,233537751  | 5,721245152 | 0,672671022 | 0,899191476 |
| CCDC8      | -0,228343334 | 4,3722995   | 0,672683775 | 0,899191476 |
| KDELC1     | -0,193626814 | 3,704303735 | 0,672939355 | 0,899191476 |
| RNF14      | 0,219976398  | 5,560456323 | 0,67315173  | 0,899191476 |
| FBXO42     | -0,189911897 | 5,941210956 | 0,673187039 | 0,899191476 |
| NGLY1      | -0,176208441 | 5,35655094  | 0,673348091 | 0,899191476 |
| MANSC1     | -0,210234846 | 6,314177271 | 0,673379777 | 0,899191476 |
| CYTH4      | -0,191976153 | 4,142300755 | 0,673567206 | 0,899191476 |
| ABCA2      | 0,326737713  | 5,137134184 | 0,67367912  | 0,899191476 |
| DDRGL1     | -0,170963572 | 5,51580312  | 0,673679361 | 0,899191476 |
| ANKS1A     | -0,170832264 | 5,419838638 | 0,673910528 | 0,899191476 |
| MARCH7     | -0,194856279 | 4,903389309 | 0,673983925 | 0,899191476 |
| CHID1      | 0,201395326  | 5,619499878 | 0,674038078 | 0,899191476 |
| DPM2       | -0,16653077  | 5,762223756 | 0,67424319  | 0,899191476 |
| NFX1       | 0,225646165  | 4,19798137  | 0,674322488 | 0,899191476 |
| WDFY1      | -0,150704115 | 6,017873608 | 0,674360641 | 0,899191476 |
| ARFGAP1    | 0,29716656   | 5,79597604  | 0,674696405 | 0,899463301 |
| PABPC4     | -0,148238651 | 7,543800474 | 0,67490343  | 0,899493929 |
| NSMAF      | 0,263667263  | 5,315377064 | 0,674983199 | 0,899493929 |
| COQ6       | 0,305777212  | 3,481005046 | 0,675146673 | 0,899535983 |
| RAVER2     | 0,271720214  | 4,301666982 | 0,675634766 | 0,900010445 |
| BTBD3      | 0,280044302  | 5,46558726  | 0,675887716 | 0,900171549 |
| NUP43      | 0,294002319  | 4,277907936 | 0,676304982 | 0,900282524 |
| GTF2A1     | 0,202187299  | 6,41583088  | 0,676320434 | 0,900282524 |
| XPO7       | -0,159364348 | 5,48485058  | 0,676367117 | 0,900282524 |
| PPP1R12A   | 0,2452976    | 5,769593332 | 0,676645395 | 0,900357089 |
| RRAS2      | 0,310493236  | 6,737129152 | 0,67668721  | 0,900357089 |
| MANEA      | -0,171922    | 5,242254913 | 0,677211246 | 0,900838355 |
| SPAG9      | -0,153363388 | 6,633428189 | 0,677313132 | 0,900838355 |
| STX5       | -0,13810978  | 5,522999927 | 0,677493523 | 0,900902562 |
| GBA2       | 0,210157005  | 5,313372925 | 0,677779416 | 0,900902868 |
| PFKL       | 0,276907367  | 7,554193381 | 0,678025858 | 0,900902868 |
| CYB5R4     | 0,252616867  | 3,208876257 | 0,678161692 | 0,900902868 |
| GYS1       | 0,250186619  | 6,598443313 | 0,678243916 | 0,900902868 |
| BIVM       | -0,16000366  | 5,130008165 | 0,678256403 | 0,900902868 |
| SLC35C1    | -0,169138921 | 4,389976645 | 0,678286453 | 0,900902868 |
| FAM96B     | -0,150781995 | 6,225231623 | 0,678561153 | 0,900970655 |
| CSGALNACT2 | -0,152292444 | 5,549730578 | 0,678601743 | 0,900970655 |
| CNBP       | 0,191856587  | 8,082233399 | 0,67891149  | 0,901028419 |
| UQCC       | 0,242295238  | 5,17908952  | 0,678914198 | 0,901028419 |
| DCP1B      | -0,166146553 | 5,23804682  | 0,679041655 | 0,901028419 |
| LYRM4      | 0,351119729  | 4,90313253  | 0,679253957 | 0,901134773 |
| ERO1LB     | -0,166184737 | 3,542155933 | 0,67974331  | 0,901608565 |
| EDEM2      | -0,171104476 | 6,206860073 | 0,679995167 | 0,90176722  |
| IER3IP1    | -0,164675063 | 7,503502713 | 0,680339762 | 0,901883208 |



|            |              |             |             |             |
|------------|--------------|-------------|-------------|-------------|
| SUMO3      | 0,183754999  | 7,051971233 | 0,680347151 | 0,901883208 |
| ZNF326     | 0,253409715  | 4,617739694 | 0,680527537 | 0,901946992 |
| CSTF2T     | 0,253336101  | 6,552939706 | 0,680699917 | 0,902000143 |
| TRMT112    | -0,158079587 | 7,971835142 | 0,681073232 | 0,90231948  |
| SEC62      | 0,218149443  | 7,063362453 | 0,681221282 | 0,902340311 |
| CUTC       | -0,173370798 | 3,402667959 | 0,681663916 | 0,902751262 |
| ZFP36L1    | -0,167401779 | 10,20273118 | 0,682068634 | 0,90300619  |
| SMG7       | 0,230268302  | 6,906261436 | 0,682121262 | 0,90300619  |
| PTMA       | -0,147835967 | 10,63198872 | 0,682413131 | 0,903217225 |
| AHCYL1     | -0,146477111 | 7,375945665 | 0,682862911 | 0,903263651 |
| PPP1R7     | -0,162467807 | 5,623435086 | 0,682982113 | 0,903263651 |
| GALK2      | -0,2010085   | 4,409020093 | 0,683048067 | 0,903263651 |
| NDUFB2     | 0,239168317  | 6,90594866  | 0,683057378 | 0,903263651 |
| CIAPIN1    | 0,28122676   | 3,846637135 | 0,683341951 | 0,903263651 |
| APAF1      | -0,163753585 | 3,929009772 | 0,683482806 | 0,903263651 |
| NF1        | -0,148513014 | 6,341704126 | 0,683495321 | 0,903263651 |
| SLC39A1    | 0,235318851  | 7,472109671 | 0,683571067 | 0,903263651 |
| TCERG1     | -0,191253742 | 5,164176086 | 0,683640373 | 0,903263651 |
| STAM       | -0,149893544 | 4,525203923 | 0,683787062 | 0,903282444 |
| ACTR1A     | -0,14343994  | 5,516327681 | 0,684187254 | 0,90360144  |
| AFG3L2     | -0,169064058 | 4,575457362 | 0,684293568 | 0,90360144  |
| ZNF267     | 0,240215339  | 5,761407917 | 0,684962711 | 0,904309918 |
| C10orf137  | -0,186725163 | 5,390751198 | 0,685213681 | 0,904357201 |
| EEF1A1     | -0,167658768 | 12,91030445 | 0,685263772 | 0,904357201 |
| LARPI      | 0,200440203  | 7,058786877 | 0,68553928  | 0,904383153 |
| VCP        | 0,243632356  | 8,654303025 | 0,68558725  | 0,904383153 |
| SS18       | -0,153143436 | 5,938272336 | 0,685681317 | 0,904383153 |
| MED25      | -0,157162148 | 5,034658429 | 0,686042431 | 0,904684459 |
| IFI27      | 0,407548339  | 9,053446986 | 0,686384561 | 0,904960619 |
| RNF123     | 0,22907515   | 4,182314224 | 0,687245435 | 0,905843907 |
| ATP5J2     | 0,21954337   | 8,311453558 | 0,687648444 | 0,905843907 |
| C19orf53   | 0,249685709  | 6,409434615 | 0,687758277 | 0,905843907 |
| CDC25B     | -0,179012719 | 7,330722356 | 0,687887264 | 0,905843907 |
| HNRNPH1    | 0,296876956  | 7,025754856 | 0,687996539 | 0,905843907 |
| UBXN2B     | 0,289789774  | 5,448659752 | 0,688301209 | 0,905843907 |
| IL8        | 0,416321617  | 6,74218035  | 0,688352018 | 0,905843907 |
| DPF2       | -0,152628085 | 6,146720665 | 0,68847486  | 0,905843907 |
| CLEC2B     | 0,30068027   | 6,854223817 | 0,688822639 | 0,905843907 |
| ZFPL1      | 0,226035085  | 4,957451957 | 0,688830849 | 0,905843907 |
| ESRRA      | 0,25880455   | 5,621459389 | 0,689021154 | 0,905843907 |
| ANKRD36BP1 | -0,144582802 | 7,214338875 | 0,689096233 | 0,905843907 |
| YIF1B      | 0,221641828  | 6,121744739 | 0,689172042 | 0,905843907 |
| CDK2       | 0,190070626  | 5,836931967 | 0,689328336 | 0,905843907 |
| ZMAT2      | -0,163168737 | 6,498957813 | 0,689334285 | 0,905843907 |
| UBE2E2     | -0,169788952 | 6,31904149  | 0,689528095 | 0,905843907 |
| CYP1B1     | 0,400116096  | 6,686099153 | 0,689546592 | 0,905843907 |
| PRR13      | 0,233001227  | 8,174849099 | 0,689635589 | 0,905843907 |
| REXO1      | -0,160774332 | 5,159462522 | 0,68971207  | 0,905843907 |
| SH3BP1     | 0,248270728  | 5,180455604 | 0,689908891 | 0,905843907 |
| CDCA7L     | -0,175783811 | 4,253760591 | 0,689970405 | 0,905843907 |

|         |              |             |             |             |
|---------|--------------|-------------|-------------|-------------|
| TAB2    | 0,202201772  | 7,750919492 | 0,690062562 | 0,905843907 |
| SKP1    | -0,147324238 | 7,378584276 | 0,690198758 | 0,905843907 |
| TARS2   | -0,159370718 | 4,581637952 | 0,690242695 | 0,905843907 |
| CSNK1E  | -0,151335612 | 7,563367702 | 0,690606829 | 0,906147386 |
| CCDC88B | 0,309009723  | 4,573254321 | 0,690990289 | 0,906158308 |
| PPP1R9B | 0,266511726  | 6,586757957 | 0,691080575 | 0,906158308 |
| OSBPL9  | 0,238942371  | 7,535323174 | 0,691122542 | 0,906158308 |
| SMAD5   | -0,149052114 | 5,523969044 | 0,691146702 | 0,906158308 |
| DTNBP1  | 0,20411436   | 4,836374874 | 0,691691688 | 0,906698505 |
| UXT     | 0,199872815  | 6,474797516 | 0,692560387 | 0,907602726 |
| GPR153  | 0,297374692  | 5,079493499 | 0,692647688 | 0,907602726 |
| ATMIN   | 0,187310472  | 6,553638947 | 0,692833131 | 0,90763538  |
| SENP6   | -0,164323894 | 5,944427749 | 0,692938816 | 0,90763538  |
| CETN2   | -0,146502866 | 5,616098585 | 0,693243796 | 0,907730233 |
| PRDX3   | 0,217812454  | 6,797796899 | 0,693277468 | 0,907730233 |
| VGLL4   | 0,264623596  | 6,971708006 | 0,693544856 | 0,907906003 |
| SEC23IP | -0,130176137 | 7,200231543 | 0,693847118 | 0,908127351 |
| TXN2    | -0,15873352  | 6,252761574 | 0,694188118 | 0,908399305 |
| POLR2J3 | 0,325953373  | 5,576138802 | 0,694398882 | 0,908500762 |
| DDX26B  | 0,314100213  | 4,451265017 | 0,694844542 | 0,908827194 |
| SMC1A   | 0,234770735  | 6,246531894 | 0,694914942 | 0,908827194 |
| VEZF1   | -0,15407394  | 5,291884946 | 0,695160933 | 0,908900484 |
| RPS19   | 0,229247498  | 11,00979793 | 0,69523756  | 0,908900484 |
| ARMC1   | -0,142668089 | 6,048989929 | 0,695616425 | 0,909221469 |
| DUSP23  | 0,226295256  | 6,624997461 | 0,696054858 | 0,909351204 |
| AKAP12  | 0,277175478  | 6,367445994 | 0,696099694 | 0,909351204 |
| PITPNM1 | -0,153709633 | 3,82075087  | 0,696115748 | 0,909351204 |
| CLIC1   | 0,241200919  | 9,247953582 | 0,696392416 | 0,90944533  |
| UPF2    | 0,226275052  | 4,972344445 | 0,696454541 | 0,90944533  |
| SMARCC2 | -0,14455916  | 7,541513595 | 0,696621903 | 0,90948971  |
| PRR12   | -0,150868029 | 6,669795938 | 0,697022818 | 0,909665471 |
| PQLC1   | 0,283634387  | 4,75705791  | 0,69702333  | 0,909665471 |
| PDIA5   | 0,392346088  | 6,423737932 | 0,697327829 | 0,909836043 |
| DIS3    | 0,210465685  | 6,479460309 | 0,697532579 | 0,909836043 |
| TP53RK  | 0,225970967  | 5,073282449 | 0,697554309 | 0,909836043 |
| AIF1    | -0,180509358 | 6,95675655  | 0,697702542 | 0,909855351 |
| MGAT5   | -0,169708098 | 5,211284336 | 0,698030365 | 0,909952396 |
| SIX5    | 0,295694687  | 5,372428607 | 0,698043846 | 0,909952396 |
| CUL3    | 0,176469863  | 7,695323901 | 0,698404618 | 0,910088681 |
| MRPS9   | 0,257095051  | 5,008580231 | 0,699149894 | 0,910088681 |
| ACVR1   | -0,146944442 | 5,782396243 | 0,699230741 | 0,910088681 |
| DHX29   | 0,291104091  | 6,801442896 | 0,699325335 | 0,910088681 |
| DNPEP   | -0,152451502 | 5,187441833 | 0,699475891 | 0,910088681 |
| PAPD5   | 0,285071738  | 3,623357521 | 0,699578844 | 0,910088681 |
| PPM1A   | 0,201085829  | 5,862801959 | 0,69958603  | 0,910088681 |
| CTBS    | 0,198549042  | 5,78573794  | 0,699601258 | 0,910088681 |
| HOOK3   | 0,234165741  | 6,478629705 | 0,699608249 | 0,910088681 |
| RHOF    | 0,362343452  | 5,981460852 | 0,699648581 | 0,910088681 |
| ELAC2   | 0,248720151  | 5,269051173 | 0,69967025  | 0,910088681 |
| SQSTM1  | 0,265558059  | 10,56035171 | 0,699749956 | 0,910088681 |

|         |              |             |             |             |
|---------|--------------|-------------|-------------|-------------|
| USP49   | -0,181837422 | 4,067001697 | 0,700114076 | 0,910388613 |
| HDAC7   | -0,163945025 | 7,518183991 | 0,700626113 | 0,910880737 |
| TNIP1   | 0,204911594  | 7,553422723 | 0,701320132 | 0,911240733 |
| PILRB   | -0,178634187 | 7,310940919 | 0,70133276  | 0,911240733 |
| ZNF662  | 0,464749705  | 5,428766811 | 0,701579276 | 0,911240733 |
| DGKA    | 0,25413816   | 5,570668078 | 0,701629159 | 0,911240733 |
| PLBD2   | 0,193793151  | 5,722784397 | 0,701802769 | 0,911240733 |
| RPS26   | 0,250909017  | 9,83982878  | 0,701829187 | 0,911240733 |
| INF2    | -0,142768009 | 6,322513459 | 0,701838441 | 0,911240733 |
| THBD    | -0,19188057  | 7,436310452 | 0,702028861 | 0,91131445  |
| LPP     | -0,159344065 | 6,497184532 | 0,702400394 | 0,911623199 |
| UBE2B   | -0,159756642 | 6,62849726  | 0,702597404 | 0,911705366 |
| REST    | 0,23259993   | 6,348595855 | 0,702751993 | 0,911732466 |
| FUT4    | -0,18427835  | 5,49093674  | 0,703117339 | 0,912032934 |
| ZNF532  | 0,207566257  | 7,796124968 | 0,70341511  | 0,912245652 |
| POLR3GL | 0,171666104  | 6,184074674 | 0,703585371 | 0,912292954 |
| RNF214  | 0,271435076  | 4,642815061 | 0,704045055 | 0,912435787 |
| RAB13   | -0,128522917 | 7,665110912 | 0,704188027 | 0,912435787 |
| FTO     | -0,140196022 | 6,234962026 | 0,704549557 | 0,912435787 |
| PPCDC   | 0,233702629  | 3,874317665 | 0,704614414 | 0,912435787 |
| SYAP1   | 0,197929968  | 5,803897044 | 0,70483949  | 0,912435787 |
| CDR2    | 0,204793104  | 5,121720228 | 0,704925563 | 0,912435787 |
| UQCR11  | -0,136630036 | 8,825221711 | 0,704925845 | 0,912435787 |
| HIVEP1  | 0,25417975   | 4,56495563  | 0,70494143  | 0,912435787 |
| CHMP4B  | 0,208827831  | 7,149119409 | 0,704941476 | 0,912435787 |
| FRMD4A  | 0,287731198  | 5,855201044 | 0,705033606 | 0,912435787 |
| ZEB1    | -0,152794731 | 6,078121753 | 0,705600839 | 0,912824566 |
| MED24   | -0,172586023 | 5,717853093 | 0,705790696 | 0,912824566 |
| RAB31   | 0,225943793  | 7,684931578 | 0,70599079  | 0,912824566 |
| ANKRD10 | 0,286720798  | 6,754535831 | 0,706010284 | 0,912824566 |
| ZNF227  | 0,221800793  | 4,179700289 | 0,706016485 | 0,912824566 |
| BCAS3   | -0,168778952 | 6,256346257 | 0,706162402 | 0,912824566 |
| DCAF4   | 0,242068376  | 5,023455734 | 0,706357177 | 0,912824566 |
| HIAT1   | 0,187334577  | 6,297080244 | 0,706404933 | 0,912824566 |
| IARS2   | 0,229179972  | 6,298192038 | 0,706607471 | 0,91291329  |
| ZNF330  | -0,120595003 | 5,602301108 | 0,707455266 | 0,913683465 |
| UBE4B   | -0,156478723 | 5,43012713  | 0,707625539 | 0,913683465 |
| NPAT    | -0,159842952 | 4,726893126 | 0,707685662 | 0,913683465 |
| CALM1   | -0,157776437 | 9,305070061 | 0,707739561 | 0,913683465 |
| TLE3    | -0,132254673 | 5,510894742 | 0,707917842 | 0,913740632 |
| NBAS    | -0,145472787 | 4,956187718 | 0,708059213 | 0,913750147 |
| ZNF335  | 0,306915022  | 4,995363018 | 0,708318614 | 0,913911945 |
| MANBAL  | -0,127764068 | 5,614790672 | 0,70900687  | 0,914444157 |
| RECQL5  | 0,242348561  | 5,257302393 | 0,709199834 | 0,914444157 |
| NUDC    | 0,173552489  | 5,270535339 | 0,709215671 | 0,914444157 |
| KLHDC10 | 0,241674491  | 5,377959739 | 0,70926751  | 0,914444157 |
| CBLB    | -0,174161783 | 5,420465503 | 0,709628096 | 0,914736104 |
| NUMBL   | 0,284984084  | 5,580994348 | 0,709806578 | 0,914793244 |
| GPBP1   | 0,227152935  | 7,102310404 | 0,710046025 | 0,914924866 |
| EAPP    | -0,146517202 | 5,606538537 | 0,710342273 | 0,914924866 |

|         |              |             |             |             |
|---------|--------------|-------------|-------------|-------------|
| GTPBP4  | -0,155327193 | 4,78821596  | 0,710513334 | 0,914924866 |
| MED4    | 0,193498067  | 5,86551922  | 0,710576289 | 0,914924866 |
| LIMS1   | -0,156923196 | 6,553147116 | 0,710579571 | 0,914924866 |
| S100A4  | -0,194341453 | 8,934120545 | 0,71105811  | 0,91502272  |
| PDIA4   | 0,298178197  | 5,254891151 | 0,711284383 | 0,91502272  |
| GPAA1   | 0,250659254  | 7,145290165 | 0,711359022 | 0,91502272  |
| ACSL3   | 0,216401129  | 6,73558404  | 0,711625678 | 0,91502272  |
| AMBRA1  | 0,301634372  | 4,457959097 | 0,711836014 | 0,91502272  |
| ATP2A2  | -0,142885773 | 6,932964537 | 0,712312396 | 0,91502272  |
| RASSF8  | -0,142585822 | 5,505030641 | 0,712344841 | 0,91502272  |
| ARFGAP2 | 0,24756859   | 5,429248118 | 0,712444115 | 0,91502272  |
| SFT2D2  | 0,169862675  | 6,074308919 | 0,712486861 | 0,91502272  |
| ASAP1   | 0,238271427  | 6,668638179 | 0,712670234 | 0,91502272  |
| GTPBP1  | -0,150394886 | 6,143216768 | 0,71282529  | 0,91502272  |
| AGTPBP1 | -0,1642067   | 4,620995131 | 0,713124878 | 0,91502272  |
| PIM1    | -0,153024558 | 7,209640876 | 0,713172064 | 0,91502272  |
| HNRPDL  | 0,184031913  | 8,46197968  | 0,713203927 | 0,91502272  |
| LRP5    | 0,378097101  | 6,234956425 | 0,713379376 | 0,91502272  |
| CDK14   | 0,319130615  | 5,763630308 | 0,713583729 | 0,91502272  |
| RFXANK  | -0,152705605 | 6,334417786 | 0,71379349  | 0,91502272  |
| BRI3    | -0,165233142 | 8,740252923 | 0,713838677 | 0,91502272  |
| FGL2    | -0,169054445 | 5,918314352 | 0,713967394 | 0,91502272  |
| SFI1    | -0,183942333 | 5,663458884 | 0,713997814 | 0,91502272  |
| GGNBP2  | 0,213063704  | 6,097499968 | 0,714146208 | 0,91502272  |
| CDKAL1  | -0,138067409 | 5,702110169 | 0,714174325 | 0,91502272  |
| FAM18B2 | 0,282495767  | 4,493547306 | 0,714177314 | 0,91502272  |
| APPL1   | -0,146992567 | 5,514126382 | 0,714259333 | 0,91502272  |
| EPS15L1 | -0,144264741 | 6,874004495 | 0,714292865 | 0,91502272  |
| UMPS    | -0,126987624 | 5,502459312 | 0,714390954 | 0,91502272  |
| RPAIN   | 0,202484085  | 4,452077697 | 0,714454383 | 0,91502272  |
| ZMYND11 | 0,18363792   | 5,89802913  | 0,71447677  | 0,91502272  |
| QRSL1   | -0,145971452 | 3,566278181 | 0,714669594 | 0,91502272  |
| EXOC8   | -0,150031269 | 5,693575046 | 0,714790286 | 0,91502272  |
| AKAP9   | -0,159578955 | 5,782200453 | 0,714815373 | 0,91502272  |
| UBIAD1  | -0,151420103 | 5,149193808 | 0,715070223 | 0,915177149 |
| PNPLA4  | 0,293840142  | 4,549493584 | 0,715233209 | 0,915213971 |
| PTPN12  | 0,230222731  | 6,938128174 | 0,715374199 | 0,915222639 |
| EIF4G3  | -0,137452143 | 6,95707816  | 0,7155708   | 0,915283189 |
| GOPC    | 0,19416859   | 5,238261954 | 0,715689979 | 0,915283189 |
| DEAF1   | 0,197166167  | 4,951537824 | 0,716074774 | 0,915603578 |
| USP36   | 0,213986514  | 7,364281241 | 0,71673325  | 0,916173381 |
| MMS19   | 0,206664228  | 6,539965441 | 0,716789117 | 0,916173381 |
| ZBTB6   | 0,206211091  | 4,336286167 | 0,717071063 | 0,916221457 |
| HSPBP1  | -0,119094828 | 6,503534527 | 0,717095456 | 0,916221457 |
| OPA1    | -0,158214552 | 4,54128832  | 0,71755906  | 0,916403192 |
| INTS12  | 0,190730944  | 4,610553405 | 0,717562531 | 0,916403192 |
| DHX8    | -0,148522084 | 4,425242935 | 0,717760013 | 0,916403192 |
| LRCH3   | 0,213739128  | 5,771951585 | 0,717775253 | 0,916403192 |
| HOMER1  | 0,219468627  | 2,984596739 | 0,718041912 | 0,916572032 |
| ZNF808  | 0,273945475  | 4,69557382  | 0,718422359 | 0,916783338 |

|              |              |             |             |             |
|--------------|--------------|-------------|-------------|-------------|
| FAM20A       | -0,150724794 | 5,634201876 | 0,718476339 | 0,916783338 |
| ASXL2        | -0,112928941 | 6,39223524  | 0,719048809 | 0,917244781 |
| ZNF646       | -0,156541562 | 4,779859374 | 0,719106995 | 0,917244781 |
| LCP2         | 0,296451523  | 7,22202965  | 0,719418556 | 0,91747057  |
| HNRNPL       | -0,121513263 | 8,036534894 | 0,719674048 | 0,91761496  |
| ZXDC         | -0,148559907 | 5,900181035 | 0,719907362 | 0,91761496  |
| C9orf64      | 0,191963587  | 5,20211897  | 0,720059698 | 0,91761496  |
| ZBED4        | -0,145245851 | 3,897280885 | 0,720070047 | 0,91761496  |
| SLC25A36     | -0,134857176 | 6,243478287 | 0,720232029 | 0,917649888 |
| HELB         | 0,239388542  | 5,005948261 | 0,720399664 | 0,917692006 |
| PHF16        | 0,220896266  | 4,926250431 | 0,720726183 | 0,917936466 |
| NUDT3        | -0,115697061 | 6,47469801  | 0,721066884 | 0,918172954 |
| AMN1         | -0,154797252 | 3,291557398 | 0,721404002 | 0,918172954 |
| MAP4K3       | 0,221417058  | 6,502029093 | 0,721440633 | 0,918172954 |
| UBE2O        | -0,149122151 | 6,148366769 | 0,72145046  | 0,918172954 |
| SLC25A17     | -0,159928231 | 3,049456692 | 0,721587671 | 0,918176214 |
| DDX28        | 0,211483065  | 5,147263587 | 0,72278595  | 0,919529364 |
| RSBN1L       | 0,177270391  | 5,597129256 | 0,723636929 | 0,920440258 |
| GLB1         | -0,128678523 | 6,170254885 | 0,723896527 | 0,920574563 |
| CC2D1A       | 0,255138259  | 5,852474295 | 0,724012521 | 0,920574563 |
| USO1         | 0,203885194  | 5,636177689 | 0,724952051 | 0,921457408 |
| TMX2         | -0,107227393 | 7,302568694 | 0,724977122 | 0,921457408 |
| MIER2        | 0,244856247  | 5,309850285 | 0,725347104 | 0,921522966 |
| PCDHB9       | -0,15461987  | 6,140931871 | 0,725545326 | 0,921522966 |
| LOC100170939 | -0,153166714 | 4,997521378 | 0,725674693 | 0,921522966 |
| PEX13        | 0,19149432   | 6,432796813 | 0,725678293 | 0,921522966 |
| HAUS1        | 0,198229842  | 4,707501435 | 0,725704403 | 0,921522966 |
| MUM1         | 0,187966073  | 5,657606897 | 0,725912005 | 0,921614963 |
| BTBD2        | -0,142206074 | 6,251948316 | 0,726090161 | 0,921669547 |
| FRS2         | -0,13525078  | 5,517099329 | 0,726466331 | 0,921829197 |
| SREBF2       | -0,145435813 | 6,768894688 | 0,726773502 | 0,921829197 |
| SAV1         | 0,167160161  | 5,823692137 | 0,72692631  | 0,921829197 |
| LBR          | 0,217334149  | 6,536953585 | 0,726940266 | 0,921829197 |
| ACADM        | -0,153895642 | 4,850314228 | 0,727090168 | 0,921829197 |
| ZW10         | 0,220916556  | 3,57534587  | 0,727143707 | 0,921829197 |
| ZBTB38       | -0,137172274 | 7,31879079  | 0,72716223  | 0,921829197 |
| TPST2        | -0,153616482 | 6,294673476 | 0,727581278 | 0,921907962 |
| PPIL4        | 0,183488793  | 5,864759906 | 0,727645518 | 0,921907962 |
| IFFO2        | 0,219957024  | 5,012010405 | 0,727746329 | 0,921907962 |
| BTN3A1       | -0,144081803 | 4,839512873 | 0,727822521 | 0,921907962 |
| PVR          | 0,233217084  | 6,655964682 | 0,727960807 | 0,921907962 |
| CETN3        | 0,231740601  | 3,991985524 | 0,72804853  | 0,921907962 |
| BCL7C        | 0,17933462   | 5,087154425 | 0,728222071 | 0,921907962 |
| STAT1        | 0,27875628   | 7,429208665 | 0,728305938 | 0,921907962 |
| ATF7IP       | 0,198773674  | 7,294566826 | 0,728868123 | 0,921923178 |
| MTIF3        | 0,208442474  | 5,895152428 | 0,728914041 | 0,921923178 |
| KIAA0754     | 0,248626351  | 6,732406512 | 0,729029136 | 0,921923178 |
| ZNF629       | -0,145983746 | 3,551157411 | 0,729206277 | 0,921923178 |
| SUSD1        | 0,219295383  | 5,58548514  | 0,729641958 | 0,921923178 |
| MEX3C        | 0,185921136  | 5,799790084 | 0,729763384 | 0,921923178 |

|          |              |             |             |             |
|----------|--------------|-------------|-------------|-------------|
| FIZ1     | -0,153859972 | 4,318149355 | 0,729790729 | 0,921923178 |
| RPLP2    | -0,12366933  | 11,32117873 | 0,729825213 | 0,921923178 |
| ARID1A   | -0,125937013 | 7,173143657 | 0,72983716  | 0,921923178 |
| ZMIZ1    | 0,333758236  | 6,271171016 | 0,729845907 | 0,921923178 |
| SLFN5    | -0,139056306 | 6,969960262 | 0,729874581 | 0,921923178 |
| POLR3H   | -0,125973786 | 5,390443413 | 0,729940349 | 0,921923178 |
| PIAS3    | 0,213265148  | 6,437558869 | 0,730384403 | 0,922226607 |
| MKNK1    | 0,273503201  | 3,997789033 | 0,730484106 | 0,922226607 |
| LSMD1    | 0,398376392  | 7,106920388 | 0,730586322 | 0,922226607 |
| C1orf52  | 0,205007421  | 4,684061773 | 0,73098634  | 0,922397042 |
| DYRK1B   | -0,167180137 | 4,27800282  | 0,730991877 | 0,922397042 |
| SUN1     | 0,166603176  | 7,102297169 | 0,73130167  | 0,922576915 |
| BMI1     | -0,142890009 | 7,283669807 | 0,731405016 | 0,922576915 |
| KIAA0913 | 0,2554052    | 6,972886746 | 0,731637154 | 0,922699048 |
| ATP6V1C1 | 0,181205338  | 6,413533221 | 0,732149106 | 0,922934095 |
| ENDOG    | 0,273002793  | 3,986704587 | 0,732202034 | 0,922934095 |
| MBTPS1   | 0,242951924  | 7,450481851 | 0,732237862 | 0,922934095 |
| TSSC1    | 0,216632726  | 4,687828262 | 0,732423519 | 0,922934095 |
| MARCH6   | 0,159515507  | 7,913328038 | 0,732500267 | 0,922934095 |
| PLSCR3   | -0,149267047 | 6,249507111 | 0,73323551  | 0,923532828 |
| TP53I3   | 0,254735123  | 4,273911257 | 0,733246331 | 0,923532828 |
| HECTD1   | -0,111939991 | 6,454190175 | 0,733493977 | 0,923604388 |
| BTBD1    | 0,187196108  | 7,389371617 | 0,733574038 | 0,923604388 |
| NR2C2    | -0,130637338 | 5,649246586 | 0,733792641 | 0,923709068 |
| SUDS3    | -0,122509065 | 5,070047517 | 0,734394504 | 0,924296072 |
| LSM6     | 0,223914157  | 5,564708769 | 0,734567861 | 0,92434365  |
| SLC17A5  | -0,174296573 | 6,302532321 | 0,735072525 | 0,924672411 |
| KRTCAP2  | -0,157989701 | 7,882348751 | 0,735100328 | 0,924672411 |
| PCDHB19P | 0,338754511  | 4,388619801 | 0,735338902 | 0,924801913 |
| UPK3BL   | -0,144469285 | 6,103640169 | 0,735807411 | 0,925144279 |
| ATP1B3   | -0,141850522 | 7,356819232 | 0,736090212 | 0,925144279 |
| UBE2D2   | 0,194959383  | 7,987329476 | 0,736235846 | 0,925144279 |
| ZBTB10   | -0,149718172 | 4,39902496  | 0,736243472 | 0,925144279 |
| LUC7L3   | 0,203854188  | 6,871864155 | 0,736365192 | 0,925144279 |
| UBE2H    | 0,202136694  | 7,222643873 | 0,736481255 | 0,925144279 |
| SPG21    | -0,104087421 | 6,27312727  | 0,736560828 | 0,925144279 |
| ROBO1    | 0,204184756  | 5,891788468 | 0,736972313 | 0,925474647 |
| WDR33    | 0,158838622  | 7,085411517 | 0,737095294 | 0,925474647 |
| MED21    | -0,114321417 | 5,914573704 | 0,737316847 | 0,925582396 |
| UBQLN2   | -0,11478098  | 7,140534316 | 0,737582179 | 0,92571366  |
| ZFAND2B  | -0,140979396 | 5,251746079 | 0,737692921 | 0,92571366  |
| VPS4A    | 0,170933039  | 6,521994527 | 0,737850565 | 0,925741123 |
| PIGN     | -0,132293556 | 5,378436438 | 0,738038067 | 0,92580603  |
| MTSS1L   | 0,318516651  | 6,650165279 | 0,73832931  | 0,925977176 |
| C1orf56  | 0,278879812  | 4,043522694 | 0,73850553  | 0,925977176 |
| C19orf24 | -0,127720483 | 4,99054468  | 0,738693778 | 0,925977176 |
| EIF4E    | 0,214658258  | 6,986209034 | 0,738717677 | 0,925977176 |
| SLC30A5  | 0,203303453  | 4,577551969 | 0,738881616 | 0,92601245  |
| FRMD8    | -0,128822952 | 5,771557128 | 0,739294257 | 0,92625553  |
| SNX27    | 0,206005868  | 5,735525741 | 0,739347243 | 0,92625553  |

|              |              |             |             |             |
|--------------|--------------|-------------|-------------|-------------|
| ARPP19       | -0,1138668   | 6,52070982  | 0,739856181 | 0,926560931 |
| RDH11        | 0,19789243   | 5,656869984 | 0,739862776 | 0,926560931 |
| IAH1         | 0,18871771   | 6,016054859 | 0,740377631 | 0,926633319 |
| EHMT2        | 0,22122589   | 5,808601099 | 0,740459008 | 0,926633319 |
| DDR1         | -0,142882916 | 6,123065941 | 0,740671495 | 0,926633319 |
| LOC100190986 | 0,25619769   | 9,860753485 | 0,740809446 | 0,926633319 |
| STAM2        | 0,16951382   | 6,647699963 | 0,740914837 | 0,926633319 |
| VRK2         | 0,266982337  | 6,212621961 | 0,740970543 | 0,926633319 |
| SETDB1       | 0,210513374  | 4,762659068 | 0,741219154 | 0,926633319 |
| APOBEC3G     | 0,252400942  | 5,004448335 | 0,741222579 | 0,926633319 |
| CBWD1        | 0,2377774    | 6,029207197 | 0,74136651  | 0,926633319 |
| CRTAP        | -0,121784717 | 8,185409033 | 0,741401738 | 0,926633319 |
| SH3RF1       | -0,137955274 | 4,506768102 | 0,741455827 | 0,926633319 |
| TUFM         | 0,157501149  | 6,53337858  | 0,741551257 | 0,926633319 |
| NDUFA9       | 0,190736139  | 5,90815884  | 0,741806086 | 0,926747459 |
| DBR1         | -0,130017117 | 4,360069439 | 0,741914412 | 0,926747459 |
| MON2         | -0,131004724 | 7,190750539 | 0,742093769 | 0,926771667 |
| NDUFB4       | -0,138990407 | 7,581072967 | 0,742334615 | 0,926771667 |
| ARAF         | -0,126102304 | 6,114812964 | 0,742435117 | 0,926771667 |
| LUZP1        | -0,121643215 | 4,774428469 | 0,742477433 | 0,926771667 |
| TMEM97       | 0,226279871  | 5,218953599 | 0,742870212 | 0,927092235 |
| SLC27A1      | -0,137915867 | 4,087224017 | 0,743318244 | 0,927358499 |
| DNMT3A       | 0,243354268  | 3,749647164 | 0,743425247 | 0,927358499 |
| AGAP3        | 0,278637417  | 6,41455362  | 0,743491555 | 0,927358499 |
| POLR3A       | 0,199704635  | 4,253543825 | 0,744037081 | 0,927869212 |
| TIAM1        | -0,144646155 | 4,3297564   | 0,744308898 | 0,927990395 |
| ATG16L1      | -0,143618185 | 4,438046604 | 0,744441586 | 0,927990395 |
| FAM100B      | -0,115311327 | 8,481026977 | 0,744695675 | 0,927990395 |
| USP24        | 0,186620906  | 7,274817252 | 0,74483421  | 0,927990395 |
| AKT3         | -0,144189218 | 7,501174811 | 0,74493045  | 0,927990395 |
| LZTR1        | -0,146080926 | 6,032233137 | 0,745229193 | 0,927990395 |
| DCTN6        | -0,120553125 | 6,884823837 | 0,7452317   | 0,927990395 |
| CASP4        | 0,23794528   | 6,99048114  | 0,74525394  | 0,927990395 |
| TBRG1        | -0,129394344 | 7,326252462 | 0,745602651 | 0,927990395 |
| IFIH1        | 0,319317807  | 4,741616623 | 0,745629376 | 0,927990395 |
| ALDH7A1      | -0,136092071 | 5,398446366 | 0,745697909 | 0,927990395 |
| FAM13B       | -0,13834834  | 5,484232826 | 0,745769429 | 0,927990395 |
| EIF2A        | 0,207633988  | 7,056382695 | 0,74590341  | 0,927990395 |
| LOC100271836 | -0,124983587 | 9,421203184 | 0,746101741 | 0,928067817 |
| NUP133       | 0,192003272  | 4,998288022 | 0,746441388 | 0,928273328 |
| TRIM5        | -0,146529394 | 4,936581868 | 0,746539218 | 0,928273328 |
| C12orf44     | 0,183539802  | 5,223309931 | 0,746760699 | 0,928379436 |
| UBE2F        | 0,18109884   | 5,097006195 | 0,747037084 | 0,92855375  |
| MYC          | 0,281849503  | 7,027207016 | 0,747224746 | 0,928617741 |
| NFKBID       | -0,124079414 | 4,409210335 | 0,747476835 | 0,92876176  |
| SNX3         | -0,138462258 | 7,301202962 | 0,747841714 | 0,928819562 |
| HSF2         | 0,243577874  | 4,339340668 | 0,747907545 | 0,928819562 |
| ATP11C       | 0,198595357  | 5,433690761 | 0,747953707 | 0,928819562 |
| COMT         | -0,121937814 | 7,194443297 | 0,748086783 | 0,928819562 |
| LY6E         | -0,127786109 | 7,086161579 | 0,748334809 | 0,928819562 |

|          |              |             |             |             |
|----------|--------------|-------------|-------------|-------------|
| EEA1     | 0,27186692   | 4,424684324 | 0,748340618 | 0,928819562 |
| EIF4B    | -0,155056884 | 6,045604763 | 0,748616687 | 0,928993119 |
| CTSL1    | -0,140160905 | 8,29525673  | 0,74888583  | 0,929072604 |
| SRD5A3   | 0,280452348  | 4,171777332 | 0,748953234 | 0,929072604 |
| SNHG11   | 0,193865679  | 4,05204606  | 0,749685532 | 0,929485125 |
| TMED2    | 0,16125657   | 8,405419467 | 0,749704899 | 0,929485125 |
| THRAP3   | 0,184139397  | 6,819581867 | 0,749744308 | 0,929485125 |
| INO80B   | 0,214269315  | 5,939718814 | 0,750127554 | 0,929485125 |
| C2orf43  | -0,110155537 | 5,197203029 | 0,750131084 | 0,929485125 |
| BTN2A1   | -0,120949596 | 6,128903732 | 0,750143985 | 0,929485125 |
| TRAM2    | -0,113131517 | 6,648706352 | 0,750430698 | 0,929485125 |
| STAU2    | 0,210523518  | 5,10497631  | 0,750483606 | 0,929485125 |
| GTF3C2   | 0,16463845   | 6,526836286 | 0,750512553 | 0,929485125 |
| KIAA1009 | -0,117383835 | 4,548092666 | 0,750979364 | 0,929894368 |
| ABT1     | 0,179572211  | 4,969939945 | 0,751501334 | 0,930163674 |
| NFAT5    | -0,114855002 | 6,695584481 | 0,751587718 | 0,930163674 |
| CPSF6    | 0,159666495  | 7,635894051 | 0,75169728  | 0,930163674 |
| DUSP8    | 0,295095146  | 4,755623868 | 0,751838105 | 0,930163674 |
| ARL8B    | 0,16824931   | 8,384791333 | 0,752002754 | 0,930163674 |
| TTC19    | -0,128346934 | 4,476621596 | 0,7520153   | 0,930163674 |
| BCS1L    | 0,230826101  | 5,000753576 | 0,75222824  | 0,930218782 |
| VCAM1    | 0,331335202  | 5,568489021 | 0,752383191 | 0,930218782 |
| KIAA0355 | 0,270342344  | 4,377526334 | 0,752633777 | 0,930218782 |
| CTDSP2   | 0,244584763  | 6,668636021 | 0,752668156 | 0,930218782 |
| GAS6     | -0,160302243 | 7,497672597 | 0,752741933 | 0,930218782 |
| UFC1     | -0,098940494 | 6,611410159 | 0,753118674 | 0,930515716 |
| NUPR1    | 0,348995869  | 10,36686288 | 0,753316483 | 0,930591503 |
| SUV420H1 | 0,201508595  | 6,332625109 | 0,753576161 | 0,930743677 |
| METTL10  | 0,188021467  | 4,689067707 | 0,754071034 | 0,931186233 |
| HNRNPUL1 | 0,154377487  | 7,628076814 | 0,754301983 | 0,931194268 |
| PDPR     | 0,193241053  | 5,036865821 | 0,75445754  | 0,931194268 |
| SBDSP1   | 0,198318777  | 5,768480192 | 0,754551026 | 0,931194268 |
| COPS8    | 0,175765658  | 7,090347102 | 0,754681276 | 0,931194268 |
| CAPRIN1  | 0,199119041  | 8,71156649  | 0,754760335 | 0,931194268 |
| HBS1L    | 0,186006094  | 5,025702343 | 0,755661347 | 0,93178553  |
| SATB1    | -0,157794607 | 5,004017262 | 0,755673093 | 0,93178553  |
| SLC1A5   | -0,136545966 | 6,750967274 | 0,755777511 | 0,93178553  |
| ZNF586   | 0,228808031  | 6,792280804 | 0,755873381 | 0,93178553  |
| FKBP2    | -0,112735369 | 5,999500555 | 0,755922797 | 0,93178553  |
| TUBB     | 0,205038055  | 8,702924687 | 0,756083615 | 0,93181532  |
| ULK1     | -0,120568111 | 6,37745548  | 0,756439801 | 0,931890003 |
| ANXA5    | -0,124435809 | 7,668186181 | 0,756534433 | 0,931890003 |
| RPL15    | -0,117203672 | 10,79032033 | 0,756554195 | 0,931890003 |
| YME1L1   | 0,162825475  | 6,8556331   | 0,757078299 | 0,932367152 |
| LTBR     | 0,190293535  | 8,355318969 | 0,757370948 | 0,932559135 |
| MAST2    | 0,210754547  | 5,761134762 | 0,757661837 | 0,932748884 |
| ZNF124   | 0,263637714  | 5,895368211 | 0,757934701 | 0,932916376 |
| TBCD     | -0,115376994 | 7,310581103 | 0,758189465 | 0,932946081 |
| SNAPC3   | 0,186629191  | 5,810450502 | 0,758232465 | 0,932946081 |
| MRFAP1   | -0,101458775 | 8,643924417 | 0,758644656 | 0,933284848 |



|          |              |             |             |             |
|----------|--------------|-------------|-------------|-------------|
| ALMS1    | 0,186840072  | 3,777773437 | 0,758969268 | 0,933515772 |
| PMPCB    | 0,166304437  | 6,504721683 | 0,759387613 | 0,933847877 |
| PDXK     | -0,110414836 | 6,918114579 | 0,759602663 | 0,933847877 |
| PCDHB14  | 0,211365049  | 3,832278189 | 0,759840118 | 0,933847877 |
| TPM4     | -0,122894842 | 9,751936297 | 0,759912232 | 0,933847877 |
| SOCS4    | -0,113393141 | 4,4760551   | 0,759954929 | 0,933847877 |
| FAM174A  | -0,104811936 | 5,186478199 | 0,760170852 | 0,933847877 |
| ABI1     | 0,190731356  | 7,616752778 | 0,760355762 | 0,933847877 |
| ETV5     | -0,112442498 | 7,22004042  | 0,760430568 | 0,933847877 |
| RRM1     | 0,244387063  | 4,385030767 | 0,760592961 | 0,933847877 |
| TM9SF4   | 0,166170543  | 6,260398638 | 0,760608756 | 0,933847877 |
| CDC42BPB | -0,113251285 | 6,171590639 | 0,761462473 | 0,934525372 |
| MAP2K7   | -0,123368621 | 5,330134397 | 0,761508829 | 0,934525372 |
| LASP1    | 0,188327925  | 8,34787745  | 0,76157171  | 0,934525372 |
| EXOSC5   | 0,191265896  | 5,028201475 | 0,761863078 | 0,934569993 |
| MLL2     | 0,262119034  | 7,433526829 | 0,761936896 | 0,934569993 |
| CHD2     | -0,105393019 | 6,909006152 | 0,762102558 | 0,934569993 |
| ELL      | 0,272964105  | 4,908775429 | 0,762277044 | 0,934569993 |
| APEH     | 0,176774796  | 5,537767347 | 0,762309593 | 0,934569993 |
| CRAMP1L  | 0,19109554   | 4,957114682 | 0,762592377 | 0,934569993 |
| LAT      | -0,110830035 | 4,974865656 | 0,762768853 | 0,934569993 |
| PES1     | 0,239193499  | 5,854532551 | 0,7629618   | 0,934569993 |
| PBX3     | -0,123631741 | 4,597298205 | 0,763037076 | 0,934569993 |
| ATF4     | 0,180072354  | 8,464106989 | 0,763115798 | 0,934569993 |
| TMED9    | 0,157502954  | 7,885024188 | 0,76322307  | 0,934569993 |
| CCNJ     | 0,174146708  | 4,706385338 | 0,76334173  | 0,934569993 |
| TMED3    | 0,214248695  | 6,25228085  | 0,763389773 | 0,934569993 |
| DOLPP1   | -0,114789949 | 4,080951131 | 0,763810016 | 0,934916621 |
| MRE11A   | 0,176056703  | 6,130184333 | 0,764206081 | 0,935098854 |
| NDUFA4   | 0,169573791  | 8,899445309 | 0,764465321 | 0,935098854 |
| KIN      | 0,280529142  | 4,645016889 | 0,764476394 | 0,935098854 |
| ERP44    | -0,11815408  | 6,486441576 | 0,764752835 | 0,935098854 |
| RCHY1    | 0,16218183   | 5,175126687 | 0,764944582 | 0,935098854 |
| IRF9     | -0,097597443 | 7,146826767 | 0,764968414 | 0,935098854 |
| TAF3     | -0,110498167 | 4,551942565 | 0,765147584 | 0,935098854 |
| FUS      | -0,128592665 | 7,148738377 | 0,765164549 | 0,935098854 |
| RLTPR    | 0,329043031  | 3,78882888  | 0,765193079 | 0,935098854 |
| BTF3     | -0,120232713 | 6,714530199 | 0,765472668 | 0,935272912 |
| FAM117B  | 0,251281398  | 4,086217592 | 0,76610599  | 0,93561301  |
| BLNK     | -0,127403459 | 4,623596374 | 0,766148406 | 0,93561301  |
| RYBP     | 0,156825366  | 5,09603524  | 0,766162641 | 0,93561301  |
| ZNF564   | -0,118080287 | 5,253717054 | 0,766324505 | 0,935643116 |
| MGST1    | 0,372769922  | 8,582538769 | 0,766687786 | 0,935919085 |
| RNF217   | 0,231635084  | 5,556459195 | 0,766902874 | 0,936014086 |
| MED29    | 0,253869838  | 6,99715163  | 0,767468228 | 0,936536479 |
| PSMD1    | 0,197033277  | 6,203332411 | 0,767658516 | 0,936601077 |
| TEAD1    | 0,259460902  | 5,377423534 | 0,768117911 | 0,936645772 |
| CS       | -0,108613169 | 5,606144259 | 0,768125927 | 0,936645772 |
| CBL      | 0,178165948  | 5,252485183 | 0,768159971 | 0,936645772 |
| NOSIP    | -0,096806297 | 6,260537869 | 0,768244581 | 0,936645772 |

|          |              |             |             |             |
|----------|--------------|-------------|-------------|-------------|
| CHD3     | 0,24178746   | 7,985530646 | 0,768850583 | 0,937217041 |
| G3BP1    | 0,133422746  | 8,42996415  | 0,76923829  | 0,937470225 |
| PPP2R3C  | 0,171832461  | 4,338916517 | 0,769385091 | 0,937470225 |
| EXOC3    | -0,109621642 | 5,705225326 | 0,769786871 | 0,937470225 |
| C11orf31 | 0,171072979  | 7,697165848 | 0,770175273 | 0,937470225 |
| MMAA     | -0,114386285 | 4,039430197 | 0,770244078 | 0,937470225 |
| NNT      | 0,169002095  | 6,89526949  | 0,770317158 | 0,937470225 |
| FAM193A  | 0,20897602   | 4,124557757 | 0,770493741 | 0,937470225 |
| SLC39A4  | 0,178715385  | 6,660384511 | 0,77053496  | 0,937470225 |
| VKORC1L1 | 0,160761644  | 6,495879342 | 0,770565476 | 0,937470225 |
| RSC1A1   | 0,191411283  | 6,351290787 | 0,770623951 | 0,937470225 |
| NUDT16   | 0,206067418  | 4,925321561 | 0,770663587 | 0,937470225 |
| PTPRJ    | -0,109484255 | 5,18799469  | 0,770797814 | 0,937470225 |
| RAPH1    | -0,113201673 | 5,930255631 | 0,770845513 | 0,937470225 |
| MEPCE    | -0,117137089 | 6,130503336 | 0,771106672 | 0,937620612 |
| ZNF77    | -0,12088615  | 4,423852238 | 0,771955688 | 0,938485618 |
| TOR3A    | 0,150628715  | 6,853063886 | 0,772579194 | 0,938728799 |
| RPS20    | 0,168198996  | 10,80192033 | 0,772587473 | 0,938728799 |
| RIPK1    | -0,101164338 | 4,887493672 | 0,772623163 | 0,938728799 |
| ZCCHC14  | 0,168626166  | 6,952341298 | 0,772736415 | 0,938728799 |
| MPDU1    | -0,101355009 | 5,194675271 | 0,772900116 | 0,938728799 |
| DHX40    | 0,154967624  | 4,168490904 | 0,77299163  | 0,938728799 |
| SLC4A2   | 0,25022369   | 5,925651761 | 0,773119363 | 0,938728799 |
| CBX5     | 0,189938457  | 6,57775694  | 0,773487588 | 0,938978279 |
| BFAR     | 0,151305644  | 5,785463085 | 0,773601469 | 0,938978279 |
| PPIC     | -0,114432633 | 6,698800551 | 0,77394038  | 0,938978279 |
| GOSR1    | 0,193018361  | 6,172913241 | 0,774027615 | 0,938978279 |
| TBC1D1   | 0,206405775  | 5,881267447 | 0,774075003 | 0,938978279 |
| ZNF678   | 0,227890061  | 5,151046476 | 0,774200491 | 0,938978279 |
| TRAF3IP2 | -0,106180444 | 5,438714786 | 0,774292132 | 0,938978279 |
| STT3B    | 0,154671824  | 6,591550532 | 0,774461108 | 0,938978279 |
| CLK3     | 0,262262583  | 6,05713112  | 0,774690028 | 0,938978279 |
| ACOT9    | -0,101251427 | 5,697392436 | 0,774701833 | 0,938978279 |
| FGFR1OP  | 0,216745044  | 4,793718083 | 0,774980788 | 0,939149457 |
| SLC43A3  | -0,118230151 | 7,711529786 | 0,775299548 | 0,939368802 |
| SEC13    | -0,10805377  | 6,554923609 | 0,775814919 | 0,939513022 |
| NBR1     | 0,140902198  | 7,977974695 | 0,77588241  | 0,939513022 |
| TMEM189  | 0,271265325  | 7,539813507 | 0,776025917 | 0,939513022 |
| PLEKHA5  | 0,184779325  | 3,263501521 | 0,776032067 | 0,939513022 |
| COMMD4   | -0,103212783 | 5,731453321 | 0,776204157 | 0,939513022 |
| TNRC6C   | 0,287381546  | 5,041631049 | 0,776245251 | 0,939513022 |
| BAG3     | 0,172921476  | 7,997547555 | 0,776821425 | 0,939755894 |
| RNF139   | -0,095297482 | 6,258330244 | 0,777156247 | 0,939755894 |
| HERC5    | -0,112057156 | 3,943960178 | 0,777431423 | 0,939755894 |
| JKAMP    | 0,148534624  | 6,019869177 | 0,777465958 | 0,939755894 |
| MRPS11   | -0,09766304  | 5,350207864 | 0,777490147 | 0,939755894 |
| ZNF688   | 0,187295666  | 4,193327615 | 0,777568544 | 0,939755894 |
| MRPS14   | 0,172886738  | 4,656583454 | 0,777596821 | 0,939755894 |
| FEM1B    | 0,189137923  | 7,600428738 | 0,777637874 | 0,939755894 |
| SNHG8    | 0,161729101  | 6,453059047 | 0,777815799 | 0,939755894 |

|          |              |             |             |             |
|----------|--------------|-------------|-------------|-------------|
| PAPSS1   | -0,105094719 | 5,603840404 | 0,778030848 | 0,939755894 |
| TMEM57   | -0,103734486 | 5,127093416 | 0,778245117 | 0,939755894 |
| C11orf49 | -0,100566037 | 5,315473214 | 0,778333514 | 0,939755894 |
| EBPL     | -0,114701757 | 6,109162625 | 0,778367616 | 0,939755894 |
| TPD52L2  | -0,094931693 | 6,146827605 | 0,778375317 | 0,939755894 |
| RBM6     | -0,120609609 | 6,660085887 | 0,778713765 | 0,939842431 |
| SEPT7    | 0,157650963  | 9,175918709 | 0,778722648 | 0,939842431 |
| TULP3    | 0,20350894   | 5,693579073 | 0,778864881 | 0,939847749 |
| ORAI2    | 0,194875026  | 5,678403721 | 0,779138031 | 0,940011011 |
| EIF3G    | -0,094345225 | 7,95369441  | 0,779871856 | 0,940353136 |
| TMUB2    | 0,161413041  | 5,700472944 | 0,779893668 | 0,940353136 |
| TUBG2    | 0,217520323  | 5,700895928 | 0,779900969 | 0,940353136 |
| G3BP2    | -0,089595757 | 7,300102523 | 0,780092657 | 0,940353136 |
| ZNF713   | 0,276056784  | 4,129637102 | 0,780294824 | 0,940353136 |
| SLC35C2  | -0,106920908 | 6,01496345  | 0,780318553 | 0,940353136 |
| COPS4    | -0,100437387 | 4,889122817 | 0,780386919 | 0,940353136 |
| WBSCR22  | 0,19925416   | 5,987023411 | 0,780601173 | 0,940398767 |
| HBP1     | -0,100079452 | 6,194605059 | 0,780700604 | 0,940398767 |
| PAAF1    | 0,193182509  | 4,621361571 | 0,781129036 | 0,94047916  |
| HYOU1    | 0,193938318  | 6,588756482 | 0,781212726 | 0,94047916  |
| RPS12    | 0,156244506  | 11,06051481 | 0,781472844 | 0,94047916  |
| GJA1     | -0,124106728 | 8,247047573 | 0,781583988 | 0,94047916  |
| CLSTN3   | 0,176547474  | 6,049911057 | 0,781792934 | 0,94047916  |
| PPRC1    | -0,097590916 | 5,072370274 | 0,78192199  | 0,94047916  |
| RBBP9    | 0,188088383  | 4,324988526 | 0,78216852  | 0,94047916  |
| BAHD1    | 0,201962527  | 6,558908143 | 0,782255351 | 0,94047916  |
| BHLHE41  | -0,116303313 | 5,846246682 | 0,782289327 | 0,94047916  |
| ZNRD1    | 0,152537935  | 4,700145123 | 0,782298693 | 0,94047916  |
| TUBGCP4  | -0,101706936 | 4,815408184 | 0,782419176 | 0,94047916  |
| CTNBL1   | 0,161062356  | 6,230714518 | 0,78242239  | 0,94047916  |
| PQBP1    | 0,190289507  | 5,175024094 | 0,782902036 | 0,940803727 |
| IK       | -0,092945096 | 6,82239911  | 0,783220296 | 0,940803727 |
| ISCA2    | 0,181895915  | 6,077789609 | 0,783265621 | 0,940803727 |
| LYSMD3   | -0,09432838  | 4,603511882 | 0,783650677 | 0,940803727 |
| GPR137B  | -0,102744122 | 6,104660016 | 0,783695611 | 0,940803727 |
| DERL1    | 0,150913795  | 6,251434113 | 0,783841604 | 0,940803727 |
| FOXK2    | 0,191378175  | 3,532803903 | 0,783860335 | 0,940803727 |
| DBNDD2   | 0,172055534  | 7,175535172 | 0,78386998  | 0,940803727 |
| DNM2     | -0,098991299 | 4,699790715 | 0,784059942 | 0,940803727 |
| CYTH2    | -0,094845068 | 6,676552461 | 0,78407209  | 0,940803727 |
| FAM133B  | 0,147956162  | 5,385178906 | 0,784371808 | 0,940967161 |
| DNAJB14  | -0,094383589 | 6,101009145 | 0,784484281 | 0,940967161 |
| TTLL5    | 0,18998764   | 6,134873256 | 0,784641737 | 0,940990504 |
| MALAT1   | -0,110105441 | 12,49002656 | 0,785547836 | 0,941911498 |
| PJA2     | -0,090231435 | 7,581578389 | 0,785967976 | 0,942001771 |
| AMOTL2   | -0,120126453 | 5,47504521  | 0,785970691 | 0,942001771 |
| PIP4K2B  | 0,219281972  | 6,832991586 | 0,786037553 | 0,942001771 |
| GNG12    | 0,214638847  | 7,257227301 | 0,786490136 | 0,942120435 |
| PPP1R2   | -0,099335722 | 6,248869236 | 0,78661451  | 0,942120435 |
| PICK1    | -0,107278178 | 5,469867614 | 0,786711772 | 0,942120435 |

|           |              |             |             |             |
|-----------|--------------|-------------|-------------|-------------|
| SLC6A6    | -0,110393608 | 6,454601887 | 0,786796695 | 0,942120435 |
| CYBA      | 0,211701009  | 7,409679452 | 0,786827376 | 0,942120435 |
| ZNF664    | 0,153948721  | 6,895123175 | 0,787096556 | 0,942250671 |
| FCHO2     | -0,095897576 | 6,332787138 | 0,787212505 | 0,942250671 |
| SDF2      | 0,176460306  | 5,610755128 | 0,787671002 | 0,942497071 |
| CDK5RAP3  | -0,109432387 | 6,784995495 | 0,787774257 | 0,942497071 |
| TCEAL4    | -0,095823086 | 6,490198204 | 0,787833011 | 0,942497071 |
| TIMM44    | -0,099369143 | 5,890803604 | 0,788222329 | 0,942797415 |
| RAC2      | 0,273195802  | 6,681314456 | 0,788581103 | 0,943061127 |
| FAM111A   | -0,098978927 | 6,21774478  | 0,788735424 | 0,943080283 |
| WDR36     | 0,193811666  | 4,188218472 | 0,788927734 | 0,943144849 |
| WTAP      | -0,106855986 | 4,475957055 | 0,789091627 | 0,943175426 |
| RPS6      | 0,170717052  | 10,6811058  | 0,789872583 | 0,94394196  |
| PGRMC1    | 0,156990636  | 8,000108003 | 0,790009792 | 0,94394196  |
| ABL2      | 0,221276118  | 5,48533168  | 0,790404279 | 0,944161542 |
| TBPL1     | -0,094740098 | 5,03067704  | 0,790514045 | 0,944161542 |
| FASTKD2   | -0,090915575 | 4,932343308 | 0,790608947 | 0,944161542 |
| C6orf106  | 0,126219103  | 7,086010279 | 0,790979568 | 0,944322681 |
| AIP       | 0,214946077  | 5,159816392 | 0,79110403  | 0,944322681 |
| PVRIG     | 0,197098265  | 5,840852048 | 0,791159331 | 0,944322681 |
| WDR6      | 0,158491231  | 6,676661751 | 0,791423198 | 0,944472312 |
| CSTF3     | 0,166048157  | 4,534280987 | 0,79170293  | 0,944571727 |
| TP53BP2   | 0,173370175  | 6,271822564 | 0,79179703  | 0,944571727 |
| GCC1      | 0,20167455   | 5,716369254 | 0,792305662 | 0,944571727 |
| RARRES2   | -0,11157923  | 8,981308503 | 0,792378664 | 0,944571727 |
| POGK      | -0,092652367 | 4,994271179 | 0,792407136 | 0,944571727 |
| SMCHD1    | -0,089853654 | 6,455547533 | 0,79248443  | 0,944571727 |
| ANKRD12   | -0,095459064 | 7,668507138 | 0,792581314 | 0,944571727 |
| GSK3B     | 0,184026586  | 7,159876185 | 0,792614668 | 0,944571727 |
| SERPINB1  | 0,291364035  | 6,825885218 | 0,793206357 | 0,945111681 |
| RPA1      | -0,088637814 | 5,142167346 | 0,793378247 | 0,945151339 |
| PRCP      | -0,11068609  | 5,995040526 | 0,793914517 | 0,945624994 |
| SERPINE1  | -0,113325152 | 8,689877057 | 0,794291151 | 0,945654    |
| RPL27     | -0,090774854 | 10,30934526 | 0,794406617 | 0,945654    |
| RP2       | 0,134466728  | 5,500252325 | 0,794709432 | 0,945654    |
| COL4A1    | -0,111536252 | 7,78870619  | 0,794742003 | 0,945654    |
| SCRN3     | 0,159684921  | 4,558525916 | 0,794797664 | 0,945654    |
| SCPEP1    | -0,094397768 | 7,000111256 | 0,794826207 | 0,945654    |
| C3orf18   | 0,198198099  | 3,853090522 | 0,794959891 | 0,945654    |
| PXMP2     | 0,183290856  | 4,691191162 | 0,795048303 | 0,945654    |
| TGS1      | 0,184241711  | 3,892398242 | 0,795271061 | 0,945753987 |
| LILRB2    | -0,095449464 | 4,489237981 | 0,795543479 | 0,945912988 |
| LOC283922 | -0,091631313 | 7,492382883 | 0,795781211 | 0,946030697 |
| WDR13     | 0,150679647  | 7,106771051 | 0,796044329 | 0,94609342  |
| FAM89B    | -0,086726936 | 6,053398332 | 0,796170071 | 0,94609342  |
| UBA3      | 0,129747479  | 6,135122774 | 0,79647238  | 0,94609342  |
| SART1     | -0,105846241 | 5,058137914 | 0,79649466  | 0,94609342  |
| PCSK7     | -0,092646525 | 6,105521975 | 0,796648764 | 0,94609342  |
| TAGLN2    | -0,093327695 | 9,181837685 | 0,796666435 | 0,94609342  |
| MTG1      | -0,101018546 | 5,820386753 | 0,796874556 | 0,946175796 |

|          |              |             |             |             |
|----------|--------------|-------------|-------------|-------------|
| PGM1     | -0,09129734  | 6,226293943 | 0,797453472 | 0,946470445 |
| CHIC2    | 0,17907605   | 5,156169307 | 0,797506931 | 0,946470445 |
| PABPC1L  | -0,097150043 | 4,987964174 | 0,797746165 | 0,946470445 |
| RBM22    | -0,089870727 | 6,164053262 | 0,797855838 | 0,946470445 |
| PHKB     | -0,100560321 | 6,365057783 | 0,797948069 | 0,946470445 |
| TYSND1   | -0,087623762 | 3,950340326 | 0,79801122  | 0,946470445 |
| MT1F     | 0,232002813  | 5,239359806 | 0,798094304 | 0,946470445 |
| TKT      | -0,098759155 | 7,194324986 | 0,798320952 | 0,946546658 |
| CC2D1B   | -0,08278578  | 5,525943588 | 0,798535363 | 0,946546658 |
| DYNC1I2  | 0,130140389  | 7,152117498 | 0,798577134 | 0,946546658 |
| HAS2     | -0,111193265 | 4,218356013 | 0,79871381  | 0,946546658 |
| ZNF92    | 0,260864334  | 4,10051087  | 0,798978356 | 0,946637738 |
| UBASH3B  | -0,105304726 | 5,428385917 | 0,799111656 | 0,946637738 |
| CLINT1   | 0,126853014  | 6,841516035 | 0,799207135 | 0,946637738 |
| MPPE1    | -0,078007095 | 5,492959681 | 0,800124367 | 0,947396543 |
| HERC6    | -0,102311209 | 4,364174338 | 0,800341775 | 0,947396543 |
| SPIN1    | -0,077898827 | 6,81444138  | 0,800353927 | 0,947396543 |
| ZNF251   | 0,232786602  | 4,807397778 | 0,800403502 | 0,947396543 |
| SNRNP70  | 0,214858439  | 4,992876796 | 0,8006824   | 0,94756218  |
| TSR2     | 0,149704723  | 6,10710183  | 0,801138508 | 0,947937444 |
| HPCAL1   | -0,095857867 | 7,216723946 | 0,801317303 | 0,947984505 |
| DDX23    | 0,189304656  | 4,757607211 | 0,801629519 | 0,948047251 |
| POLRMT   | 0,175308994  | 5,412019473 | 0,801661432 | 0,948047251 |
| PHACTR4  | 0,179073297  | 5,027489743 | 0,801787432 | 0,948047251 |
| KCTD17   | 0,195616116  | 5,53677737  | 0,802255763 | 0,94830046  |
| DPYSL3   | -0,102149263 | 6,40825236  | 0,802390561 | 0,94830046  |
| HEATR7A  | 0,213617698  | 6,237974933 | 0,802423985 | 0,94830046  |
| STARD7   | -0,086778775 | 6,525203008 | 0,802557847 | 0,94830046  |
| CXorf38  | -0,107612698 | 2,856764351 | 0,802892738 | 0,94842953  |
| MAP4     | -0,083114738 | 7,809566667 | 0,802945252 | 0,94842953  |
| KCNK5    | -0,109526772 | 4,372062627 | 0,803143718 | 0,948499656 |
| DDHD2    | 0,197148228  | 6,23577403  | 0,804396887 | 0,949815129 |
| TMEM167B | -0,088352192 | 5,56116906  | 0,804908443 | 0,950254618 |
| UBAP2L   | -0,088459503 | 7,143113297 | 0,805108679 | 0,950326481 |
| DZIP1    | -0,096946608 | 4,992118834 | 0,805581812 | 0,950622303 |
| CCRN4L   | 0,167995811  | 4,582439414 | 0,805638113 | 0,950622303 |
| PTBP1    | 0,184641922  | 8,346098967 | 0,805784219 | 0,950630205 |
| COL18A1  | -0,091899514 | 7,34561397  | 0,806016168 | 0,950739362 |
| CHMP4A   | -0,07834311  | 5,081417783 | 0,806816786 | 0,951519139 |
| RING1    | 0,191398963  | 7,020988186 | 0,807168118 | 0,9516831   |
| EPS8     | -0,08264802  | 6,573405628 | 0,807354396 | 0,9516831   |
| CPSF7    | -0,087513106 | 5,358331143 | 0,807374503 | 0,9516831   |
| RND3     | 0,255123162  | 5,911514175 | 0,807798805 | 0,951698677 |
| PHF21A   | -0,077976432 | 6,095696013 | 0,807977729 | 0,951698677 |
| SCAMP3   | -0,080125776 | 6,440340911 | 0,808011913 | 0,951698677 |
| GIGYF1   | 0,175437761  | 6,91405814  | 0,808124705 | 0,951698677 |
| EML4     | -0,088620606 | 6,506592296 | 0,808322608 | 0,951698677 |
| RASSF3   | -0,08436983  | 6,649848003 | 0,808344697 | 0,951698677 |
| TCF25    | -0,088728058 | 6,194289279 | 0,808371151 | 0,951698677 |
| MANF     | 0,147268179  | 7,050511556 | 0,808565256 | 0,951698677 |

|           |              |             |             |             |
|-----------|--------------|-------------|-------------|-------------|
| ASB7      | 0,137519106  | 3,950228217 | 0,808935265 | 0,951698677 |
| SRP14     | -0,071216623 | 8,70898456  | 0,808960757 | 0,951698677 |
| CDKN2AIP  | 0,206583561  | 3,633438645 | 0,80899181  | 0,951698677 |
| ADAM19    | 0,261759492  | 5,645586156 | 0,809063541 | 0,951698677 |
| CRTC2     | 0,169063029  | 6,109736532 | 0,809202072 | 0,951698677 |
| TRIM23    | -0,0883063   | 4,058334342 | 0,809382229 | 0,951746408 |
| MAGED2    | 0,141786777  | 8,664834842 | 0,809599888 | 0,951838213 |
| CWF19L1   | 0,156136123  | 5,975968485 | 0,810054665 | 0,952127138 |
| EIF1AX    | -0,082715442 | 7,746786106 | 0,810476412 | 0,952127138 |
| SSBP4     | -0,081723807 | 6,020434926 | 0,810494006 | 0,952127138 |
| SETD7     | -0,084203206 | 6,165235398 | 0,810526884 | 0,952127138 |
| MED13     | -0,072739556 | 6,142947546 | 0,81054378  | 0,952127138 |
| OCEL1     | -0,095456357 | 3,496772143 | 0,811039923 | 0,952545855 |
| PTK7      | -0,085080465 | 6,178386932 | 0,811276712 | 0,952602677 |
| RPL32P3   | 0,217685152  | 5,127122927 | 0,811393189 | 0,952602677 |
| PSME1     | -0,082080019 | 6,821472072 | 0,811518052 | 0,952602677 |
| STAT2     | -0,079343411 | 6,313475349 | 0,811647097 | 0,952602677 |
| RPL6      | 0,183720729  | 9,947031993 | 0,812262905 | 0,952814528 |
| PDCD7     | 0,165366401  | 4,838154231 | 0,81233997  | 0,952814528 |
| MIER1     | 0,128139178  | 5,862127043 | 0,812778533 | 0,952814528 |
| OGG1      | 0,163665923  | 4,541089195 | 0,812901938 | 0,952814528 |
| NCOR2     | -0,071228155 | 8,061272964 | 0,813055861 | 0,952814528 |
| BTBD7     | 0,134494631  | 6,277180664 | 0,813073492 | 0,952814528 |
| ZBTB7A    | -0,075166653 | 7,670711565 | 0,813082981 | 0,952814528 |
| CAST      | 0,13824056   | 7,788265047 | 0,813121358 | 0,952814528 |
| SPTY2D1   | 0,134892563  | 5,78146342  | 0,813216058 | 0,952814528 |
| RP9       | -0,089311038 | 4,410588574 | 0,813611752 | 0,952814528 |
| SLC38A1   | -0,081592609 | 4,784720205 | 0,813878658 | 0,952814528 |
| CENPB     | 0,147687088  | 7,468899956 | 0,813909117 | 0,952814528 |
| CCDC7     | 0,153820679  | 4,882471545 | 0,814154258 | 0,952814528 |
| SLC44A1   | 0,196568758  | 6,527366557 | 0,814273537 | 0,952814528 |
| UFM1      | 0,169620278  | 3,039325922 | 0,814663166 | 0,952814528 |
| DUSP22    | 0,216233902  | 7,021586584 | 0,81467124  | 0,952814528 |
| DIP2A     | -0,083045468 | 4,541629938 | 0,814688794 | 0,952814528 |
| PRKRA     | -0,076153097 | 6,460248788 | 0,814693047 | 0,952814528 |
| HIBADH    | 0,17506109   | 5,506064987 | 0,814868738 | 0,952814528 |
| PPP6C     | 0,120637459  | 6,107450274 | 0,814895407 | 0,952814528 |
| VEGFB     | -0,076894279 | 6,671353115 | 0,814919489 | 0,952814528 |
| LAMP2     | 0,201195049  | 8,228386313 | 0,814938504 | 0,952814528 |
| ABI2      | 0,132625266  | 6,736220454 | 0,815085767 | 0,952814528 |
| BAG1      | -0,081382452 | 5,757798438 | 0,815230331 | 0,952814528 |
| RAB11FIP3 | -0,087206533 | 5,843431811 | 0,815320835 | 0,952814528 |
| TGFBRAP1  | 0,137944713  | 4,30894332  | 0,815659608 | 0,953047098 |
| UBE2G2    | -0,08353027  | 6,102915437 | 0,815985313 | 0,953137848 |
| PTGS1     | -0,087706895 | 5,359592174 | 0,816144513 | 0,953137848 |
| URB1      | 0,191864603  | 4,651327255 | 0,816401301 | 0,953137848 |
| PHRF1     | -0,078745946 | 5,377438259 | 0,816476151 | 0,953137848 |
| KLHL8     | 0,151882109  | 2,802929416 | 0,816500163 | 0,953137848 |
| PLTP      | -0,077675438 | 7,434109265 | 0,816575936 | 0,953137848 |
| STX4      | 0,116818954  | 6,772385817 | 0,81676221  | 0,953192112 |

|           |              |             |             |             |
|-----------|--------------|-------------|-------------|-------------|
| ZDHHC20   | 0,153233239  | 6,841922874 | 0,81705036  | 0,95336523  |
| CLCN7     | 0,144540649  | 6,071173987 | 0,817293762 | 0,953486085 |
| AKT1      | 0,194946753  | 6,140238985 | 0,817499213 | 0,95356263  |
| WDR26     | 0,113406097  | 6,214753471 | 0,817770209 | 0,95371559  |
| ETNK1     | -0,06842327  | 5,69602511  | 0,818133309 | 0,953975895 |
| WTIP      | 0,326532871  | 5,927028419 | 0,818503178 | 0,954041983 |
| GTF3C5    | 0,122239385  | 5,385662399 | 0,818554858 | 0,954041983 |
| FAM126B   | 0,153869671  | 5,70922733  | 0,818719283 | 0,954041983 |
| DBNL      | -0,06941902  | 6,772174061 | 0,818872367 | 0,954041983 |
| LOC441454 | -0,085943626 | 4,839662447 | 0,818918934 | 0,954041983 |
| PAM       | 0,161764978  | 5,649577111 | 0,819217431 | 0,954041983 |
| HPS5      | 0,174814097  | 5,343234525 | 0,819247442 | 0,954041983 |
| GPN3      | -0,082333036 | 3,884326173 | 0,819309261 | 0,954041983 |
| FBXW11    | -0,074343022 | 4,242069605 | 0,819553967 | 0,954163991 |
| RPL35A    | 0,179856312  | 3,573601755 | 0,820122669 | 0,954663106 |
| CYB5B     | -0,069349899 | 6,909521704 | 0,820303227 | 0,95471031  |
| ZFC3H1    | -0,072784308 | 5,864841921 | 0,820472038 | 0,954743827 |
| KIAA1033  | 0,139640324  | 3,068585825 | 0,820631152 | 0,954766051 |
| ASAP3     | 0,190051979  | 5,040352798 | 0,821069116 | 0,954965337 |
| ASXL1     | 0,178422702  | 6,662907948 | 0,82108253  | 0,954965337 |
| CDC40     | -0,066045809 | 5,6421222   | 0,821396229 | 0,955067835 |
| SYF2      | 0,137861715  | 7,051896121 | 0,82155776  | 0,955067835 |
| RBM19     | -0,079776685 | 4,838882362 | 0,821590837 | 0,955067835 |
| GSTP1     | 0,157572092  | 9,944685561 | 0,822140889 | 0,955360317 |
| RFK       | -0,083760673 | 4,269257755 | 0,822222682 | 0,955360317 |
| ORMDL1    | -0,073498688 | 5,058299123 | 0,822359471 | 0,955360317 |
| BCKDK     | -0,067553843 | 6,159324497 | 0,822523895 | 0,955360317 |
| CFB       | 0,267790335  | 6,292319584 | 0,822542957 | 0,955360317 |
| RNF40     | -0,069414684 | 6,353240313 | 0,822708128 | 0,955389428 |
| TRIP11    | -0,072962002 | 5,30565691  | 0,823439823 | 0,955882473 |
| CERK      | 0,171202618  | 6,695338403 | 0,82351448  | 0,955882473 |
| FOXP1     | -0,072650718 | 7,577060752 | 0,823553238 | 0,955882473 |
| SNAPIN    | 0,133329533  | 6,365492142 | 0,82386574  | 0,956082451 |
| CROT      | 0,14639311   | 3,992670181 | 0,824262524 | 0,956352339 |
| MPRIP     | 0,296910168  | 8,141009648 | 0,824508835 | 0,956352339 |
| CDK5RAP2  | 0,1361539    | 6,041169479 | 0,82451905  | 0,956352339 |
| DYNLRB1   | 0,151782491  | 6,39188012  | 0,825353943 | 0,957009007 |
| LSM10     | 0,149846264  | 4,393130464 | 0,825503937 | 0,957009007 |
| ACVR1B    | 0,133258577  | 5,114407772 | 0,82550623  | 0,957009007 |
| IFNAR2    | -0,071734463 | 5,975631027 | 0,826021359 | 0,957341212 |
| CAMK2G    | -0,070907197 | 5,016551987 | 0,826133935 | 0,957341212 |
| C6orf48   | 0,132605665  | 8,192090272 | 0,826213965 | 0,957341212 |
| RNF31     | -0,071450551 | 5,61750306  | 0,826917112 | 0,957877909 |
| RALY      | 0,125944371  | 7,25133114  | 0,826958095 | 0,957877909 |
| RPL23AP82 | 0,205417928  | 4,380346148 | 0,827145566 | 0,957932339 |
| ZNF782    | 0,190353574  | 5,735166048 | 0,828014827 | 0,957994551 |
| TAOK3     | 0,147239204  | 7,404394398 | 0,828325988 | 0,957994551 |
| SDF4      | 0,121783734  | 8,076865829 | 0,828336836 | 0,957994551 |
| BICD2     | 0,165624538  | 5,539185242 | 0,828397872 | 0,957994551 |
| USP6NL    | 0,173378641  | 4,543248632 | 0,828519354 | 0,957994551 |

|          |              |             |             |             |
|----------|--------------|-------------|-------------|-------------|
| HINT1    | 0,154758837  | 8,451180371 | 0,828637317 | 0,957994551 |
| DNAJB6   | 0,137071212  | 8,317423058 | 0,828764138 | 0,957994551 |
| SH3BP4   | -0,076293569 | 6,205349456 | 0,828905565 | 0,957994551 |
| ST20     | 0,219386321  | 4,973318539 | 0,82894246  | 0,957994551 |
| ARPC1A   | -0,07424207  | 7,279461912 | 0,829071339 | 0,957994551 |
| BIRC2    | 0,131293926  | 6,553165601 | 0,829254812 | 0,957994551 |
| INTS2    | -0,072177939 | 4,18323422  | 0,829474203 | 0,957994551 |
| SMARCA4  | 0,147666552  | 6,381031789 | 0,829569287 | 0,957994551 |
| MKL1     | -0,080589514 | 4,333428248 | 0,829673875 | 0,957994551 |
| MRC2     | 0,197054437  | 7,498808701 | 0,829711862 | 0,957994551 |
| PRKAA1   | 0,12999433   | 5,592485667 | 0,829719608 | 0,957994551 |
| PARN     | -0,07065532  | 5,709385943 | 0,829981676 | 0,957994551 |
| YARS2    | -0,067397208 | 4,858716999 | 0,830084171 | 0,957994551 |
| SLC35B3  | -0,075151765 | 4,634973143 | 0,830302421 | 0,957994551 |
| PCBP2    | 0,13224838   | 8,804893586 | 0,830330773 | 0,957994551 |
| UBA52    | 0,143774985  | 10,22431725 | 0,830430652 | 0,957994551 |
| IDH3G    | 0,123289979  | 7,230477734 | 0,830517607 | 0,957994551 |
| FAM102A  | 0,152808063  | 5,843859228 | 0,830830952 | 0,957994551 |
| CCDC57   | -0,071998564 | 5,252557965 | 0,83094102  | 0,957994551 |
| ZNF141   | -0,072677917 | 5,20005544  | 0,831113058 | 0,957994551 |
| EFR3A    | 0,125942723  | 6,779391899 | 0,831182613 | 0,957994551 |
| PCNXL2   | -0,07063824  | 5,516057845 | 0,831358553 | 0,957994551 |
| MARK2    | -0,06993755  | 6,589288959 | 0,831529114 | 0,957994551 |
| LZTFL1   | -0,06603606  | 5,660882886 | 0,831722725 | 0,957994551 |
| USP38    | -0,077602858 | 3,954576566 | 0,831794042 | 0,957994551 |
| ZNF460   | 0,161908696  | 6,495420852 | 0,831812422 | 0,957994551 |
| RFNG     | -0,07557449  | 5,149317449 | 0,831849827 | 0,957994551 |
| SLC9A6   | -0,073663624 | 5,872887745 | 0,832157141 | 0,957994551 |
| SMARCD2  | 0,108741686  | 6,705906325 | 0,832218907 | 0,957994551 |
| KDSR     | 0,142585395  | 6,067628453 | 0,832300255 | 0,957994551 |
| CBFB     | -0,069591082 | 5,383629039 | 0,83240696  | 0,957994551 |
| NBPF14   | -0,074268702 | 5,614887047 | 0,832606304 | 0,957994551 |
| RALGAPB  | 0,116373185  | 7,074039421 | 0,832646135 | 0,957994551 |
| FBXO33   | -0,069416161 | 4,089612811 | 0,832726469 | 0,957994551 |
| ATXN7L3  | 0,137273011  | 6,217392919 | 0,832862649 | 0,957994551 |
| LPCAT4   | 0,163310432  | 4,52601725  | 0,832964444 | 0,957994551 |
| LRIG2    | 0,171404108  | 4,626243463 | 0,833099822 | 0,957994551 |
| PCF11    | -0,071261517 | 5,441149469 | 0,833522157 | 0,958016216 |
| SPDYE7P  | 0,187546504  | 7,776283659 | 0,833742389 | 0,958016216 |
| C2orf18  | -0,06715251  | 5,826106845 | 0,833831747 | 0,958016216 |
| EXOSC1   | -0,062623096 | 6,797614203 | 0,833927524 | 0,958016216 |
| RCOR3    | 0,220159145  | 6,476132727 | 0,833950108 | 0,958016216 |
| RNF187   | -0,07355376  | 5,914383008 | 0,833961616 | 0,958016216 |
| ZNF607   | 0,162695523  | 3,152918298 | 0,834292039 | 0,958182386 |
| BBS7     | -0,068821835 | 3,745381691 | 0,834654077 | 0,958182386 |
| E2F4     | -0,062453986 | 6,080776355 | 0,834801524 | 0,958182386 |
| KIAA0556 | -0,071491657 | 4,82329225  | 0,834864188 | 0,958182386 |
| ANKZF1   | 0,173531171  | 4,63954214  | 0,835118051 | 0,958182386 |
| C1orf123 | -0,067098817 | 6,208636121 | 0,835546158 | 0,958182386 |
| GLOD4    | 0,193446001  | 4,661093242 | 0,83556365  | 0,958182386 |



|          |              |             |             |             |
|----------|--------------|-------------|-------------|-------------|
| SCYL2    | -0,069656963 | 5,269559797 | 0,835745383 | 0,958182386 |
| COBRA1   | -0,069696153 | 5,169672501 | 0,83591155  | 0,958182386 |
| CDK18    | -0,071965203 | 6,295890502 | 0,835943066 | 0,958182386 |
| PRPF38B  | 0,106772963  | 6,491577178 | 0,836028349 | 0,958182386 |
| CCNK     | 0,112326343  | 7,827938949 | 0,83602995  | 0,958182386 |
| WWP1     | -0,070660728 | 3,830360293 | 0,836044797 | 0,958182386 |
| TMEM106B | 0,150955248  | 6,359947191 | 0,8360735   | 0,958182386 |
| FLJ45445 | 0,208746967  | 2,928366373 | 0,836308677 | 0,958290854 |
| POM121C  | 0,116849884  | 5,712333655 | 0,836690784 | 0,958315733 |
| KRTCAP3  | -0,076525065 | 4,47151739  | 0,836840744 | 0,958315733 |
| MBOAT7   | 0,161944595  | 6,770852415 | 0,83688243  | 0,958315733 |
| HMG20B   | -0,070604861 | 5,392312946 | 0,836892534 | 0,958315733 |
| SNRPC    | 0,134894923  | 6,033092404 | 0,837631164 | 0,958634548 |
| MGAT4B   | 0,184258592  | 8,0268572   | 0,837726936 | 0,958634548 |
| QKI      | -0,05968003  | 7,58362548  | 0,837730083 | 0,958634548 |
| SNRPB2   | -0,065909904 | 6,47955086  | 0,837733285 | 0,958634548 |
| USP39    | -0,058992802 | 5,91797101  | 0,8379656   | 0,958739501 |
| CAMKK2   | -0,067081215 | 4,267553771 | 0,838816104 | 0,959551587 |
| RPL39    | 0,177011427  | 9,66548276  | 0,839034343 | 0,959640253 |
| C12orf10 | 0,147884881  | 4,78641464  | 0,839469858 | 0,959832963 |
| LEPRE1   | 0,198229761  | 6,136410819 | 0,839585291 | 0,959832963 |
| NFYB     | -0,066886435 | 5,47536875  | 0,839788707 | 0,959832963 |
| ZNFX1    | -0,066355577 | 5,850683121 | 0,839900267 | 0,959832963 |
| TRA2B    | -0,060390925 | 6,320730723 | 0,839906627 | 0,959832963 |
| HS6ST1   | 0,213959215  | 5,731966675 | 0,840250173 | 0,960050692 |
| UNC5B    | -0,067623273 | 7,451832338 | 0,840567183 | 0,960050692 |
| HDAC6    | 0,145464958  | 7,510256843 | 0,840626931 | 0,960050692 |
| PPL      | 0,213057835  | 6,129857725 | 0,840660314 | 0,960050692 |
| MTMR1    | 0,134378646  | 5,232288827 | 0,841214286 | 0,960522474 |
| CAPG     | -0,066503528 | 8,423189204 | 0,841389825 | 0,960562066 |
| GPR89A   | 0,143174095  | 5,036409542 | 0,841777883 | 0,960728963 |
| G0S2     | -0,06312343  | 7,616885202 | 0,841975987 | 0,960728963 |
| SLC1A3   | 0,238761577  | 5,106017709 | 0,842083213 | 0,960728963 |
| UBXN1    | -0,056325348 | 7,206315433 | 0,842396619 | 0,960728963 |
| ADAM9    | 0,161696395  | 7,03551859  | 0,842497464 | 0,960728963 |
| ANKIB1   | 0,166035044  | 5,556326128 | 0,842552727 | 0,960728963 |
| GSTK1    | 0,14020481   | 7,384412075 | 0,842605672 | 0,960728963 |
| ELMO2    | -0,061934835 | 5,354148499 | 0,842663136 | 0,960728963 |
| EMP3     | 0,130922738  | 8,732358823 | 0,842974177 | 0,96083375  |
| ASH1L    | 0,172636349  | 7,414450919 | 0,843036857 | 0,96083375  |
| CD99L2   | 0,106936446  | 6,22453751  | 0,84323246  | 0,96089608  |
| C19orf10 | -0,057892898 | 6,803933883 | 0,843554068 | 0,961013805 |
| SH3PXD2B | -0,064780179 | 6,330642471 | 0,843617632 | 0,961013805 |
| RNPEP    | 0,116778206  | 6,580547387 | 0,844023687 | 0,961315771 |
| TBL2     | 0,165310083  | 4,646222067 | 0,844355308 | 0,961532873 |
| SP1      | 0,112814847  | 6,325786081 | 0,844604433 | 0,961655974 |
| DDX52    | -0,064737961 | 4,024280185 | 0,844911589 | 0,961721414 |
| SAFB2    | -0,057354338 | 4,139143513 | 0,845010846 | 0,961721414 |
| MED14    | -0,053317211 | 7,778068046 | 0,845219559 | 0,961721414 |
| PLEKHJ1  | -0,065748613 | 4,441978223 | 0,845519425 | 0,961721414 |

|          |              |             |             |             |
|----------|--------------|-------------|-------------|-------------|
| PTPN23   | -0,057852917 | 6,316385886 | 0,845527167 | 0,961721414 |
| YWHAB    | 0,132683575  | 8,03572197  | 0,84557724  | 0,961721414 |
| SARS     | 0,123999395  | 6,848665492 | 0,845649156 | 0,961721414 |
| SLC46A1  | -0,066153179 | 3,476575029 | 0,845982515 | 0,961794261 |
| ISG20    | 0,158230091  | 5,099721046 | 0,845995304 | 0,961794261 |
| ATP5C1   | 0,121039808  | 7,534795189 | 0,84650128  | 0,961983759 |
| GNB4     | -0,064710978 | 3,922154398 | 0,846751593 | 0,961983759 |
| CCND1    | 0,141585941  | 7,83137551  | 0,846956249 | 0,961983759 |
| TMX3     | -0,059508738 | 5,614775212 | 0,846988935 | 0,961983759 |
| ZNF14    | -0,062481443 | 3,671121197 | 0,84706816  | 0,961983759 |
| PANK4    | -0,06149716  | 5,33462989  | 0,847251935 | 0,961983759 |
| MOCS3    | 0,12082074   | 4,269793085 | 0,847638401 | 0,961983759 |
| STK4     | 0,120980645  | 6,355791401 | 0,847639186 | 0,961983759 |
| USMG5    | 0,163771913  | 7,909080092 | 0,847757729 | 0,961983759 |
| CHI3L1   | 0,361118697  | 7,048546531 | 0,84779584  | 0,961983759 |
| ADNP2    | -0,056784213 | 5,14190719  | 0,847909896 | 0,961983759 |
| ZFYVE9   | -0,058991363 | 5,564080736 | 0,84795928  | 0,961983759 |
| MESDC2   | 0,102322835  | 6,58955619  | 0,848029161 | 0,961983759 |
| PLCG1    | 0,146473146  | 5,900009367 | 0,848137023 | 0,961983759 |
| DHDDS    | -0,055183555 | 5,536015232 | 0,848531685 | 0,962271339 |
| PDE7A    | 0,163551816  | 6,249117776 | 0,848744533 | 0,962352672 |
| ARIH2    | -0,057176569 | 5,950130968 | 0,849426082 | 0,962936959 |
| HACL1    | 0,206645586  | 4,07957945  | 0,849623304 | 0,962936959 |
| SRC      | -0,057712589 | 4,647088837 | 0,849953971 | 0,962936959 |
| TMTC3    | -0,056043228 | 5,920634225 | 0,84996241  | 0,962936959 |
| EEFSEC   | -0,059585474 | 3,225762102 | 0,850301893 | 0,962936959 |
| DDA1     | -0,058088166 | 6,788785709 | 0,850385893 | 0,962936959 |
| KLHL7    | 0,112264769  | 4,159467689 | 0,850432895 | 0,962936959 |
| SYT11    | -0,060278709 | 5,368353027 | 0,850443186 | 0,962936959 |
| MARVELD1 | 0,146731412  | 5,641984304 | 0,850600018 | 0,962936959 |
| CEP70    | 0,156038487  | 3,486867503 | 0,850671981 | 0,962936959 |
| CSNK1D   | 0,1426722    | 7,363662262 | 0,850963045 | 0,962949965 |
| GLE1     | 0,110986245  | 6,076125337 | 0,850994503 | 0,962949965 |
| MPZL3    | -0,061350359 | 5,209801714 | 0,851249489 | 0,962949965 |
| SQRDL    | -0,059626427 | 6,109813349 | 0,851303736 | 0,962949965 |
| FAM135A  | 0,138717725  | 6,494871324 | 0,851465881 | 0,962949965 |
| PACS1    | 0,102717761  | 6,055573001 | 0,851655325 | 0,962949965 |
| NPIP     | 0,298910979  | 4,704851011 | 0,851671981 | 0,962949965 |
| NEK7     | -0,057069464 | 6,951832755 | 0,852062129 | 0,963211909 |
| TEAD3    | 0,154506774  | 5,685528132 | 0,852265261 | 0,963211909 |
| NEK4     | 0,107703272  | 5,304460133 | 0,852519822 | 0,963211909 |
| MMD      | 0,151866243  | 5,516627418 | 0,852650014 | 0,963211909 |
| STRADA   | -0,05846295  | 4,638166702 | 0,852651594 | 0,963211909 |
| CD99     | 0,10523183   | 8,54786749  | 0,852752081 | 0,963211909 |
| NENF     | -0,052667397 | 7,424442759 | 0,852892434 | 0,963211909 |
| RFXAP    | -0,060874734 | 3,358363909 | 0,853120115 | 0,963309499 |
| TOR1AIP2 | 0,102029185  | 5,120738605 | 0,8535952   | 0,963317347 |
| GANAB    | 0,159053073  | 5,484893104 | 0,8536078   | 0,963317347 |
| KIF13B   | -0,054862257 | 6,254917775 | 0,853680182 | 0,963317347 |
| GTF2A2   | -0,052425192 | 6,890569585 | 0,853804776 | 0,963317347 |

|           |              |             |             |             |
|-----------|--------------|-------------|-------------|-------------|
| ENSA      | 0,105412561  | 8,026725083 | 0,853833413 | 0,963317347 |
| NMT1      | 0,102654956  | 6,629351666 | 0,853996971 | 0,963342488 |
| NUP98     | -0,048983184 | 6,160687684 | 0,854466379 | 0,963582577 |
| LMBR1     | 0,124609159  | 6,111253126 | 0,854518344 | 0,963582577 |
| RAB11FIP2 | 0,113811269  | 6,002173348 | 0,854633733 | 0,963582577 |
| ARL6IP4   | 0,115414066  | 7,419965553 | 0,855434886 | 0,964226793 |
| AP2S1     | 0,125972682  | 7,15396725  | 0,855594666 | 0,964226793 |
| H2AFY     | 0,10559692   | 7,083700794 | 0,855731061 | 0,964226793 |
| UBXN4     | 0,096380087  | 6,915647063 | 0,855770722 | 0,964226793 |
| DPCD      | 0,11196252   | 4,941619482 | 0,85599957  | 0,964325305 |
| UPF1      | -0,054012112 | 5,282867742 | 0,856340364 | 0,964549875 |
| ACTN4     | -0,054659748 | 9,354894335 | 0,856606291 | 0,964605107 |
| ZNF12     | -0,054452923 | 5,204153927 | 0,856672316 | 0,964605107 |
| ZBTB8OS   | 0,102392607  | 5,829058771 | 0,857221181 | 0,964879845 |
| ZNF616    | 0,13544382   | 3,009330901 | 0,857330371 | 0,964879845 |
| TOLLIP    | -0,054506009 | 5,156802101 | 0,857618022 | 0,964879845 |
| TRPM7     | 0,118127197  | 5,747454724 | 0,857697613 | 0,964879845 |
| KIF5B     | 0,106078974  | 8,275551292 | 0,857849484 | 0,964879845 |
| MAPK12    | 0,162373997  | 5,957239019 | 0,857889913 | 0,964879845 |
| MFHAS1    | -0,055083623 | 5,247762212 | 0,858170113 | 0,964879845 |
| ARPC5L    | -0,055235172 | 4,539077378 | 0,85840299  | 0,964879845 |
| ZDHHC6    | 0,108349008  | 5,402092163 | 0,858460773 | 0,964879845 |
| CDC27     | 0,150615633  | 8,304867919 | 0,858484529 | 0,964879845 |
| DUSP11    | -0,049016107 | 5,956018066 | 0,858663156 | 0,964879845 |
| MRPS30    | -0,053182639 | 5,504978186 | 0,858750129 | 0,964879845 |
| UBR4      | -0,051948245 | 7,595052042 | 0,858917266 | 0,964879845 |
| ZNF468    | 0,146013953  | 4,557762875 | 0,859186258 | 0,964879845 |
| PACS2     | 0,12589447   | 6,677210729 | 0,859276734 | 0,964879845 |
| NGRN      | -0,049737174 | 7,7355975   | 0,859529139 | 0,964879845 |
| PCK2      | 0,122257447  | 5,59817836  | 0,859560605 | 0,964879845 |
| ANAPC5    | -0,051336646 | 5,534608347 | 0,859747379 | 0,964879845 |
| ZMPSTE24  | -0,051760923 | 5,04930947  | 0,859960015 | 0,964879845 |
| TTC3      | 0,135279813  | 5,543298859 | 0,860071655 | 0,964879845 |
| GLO1      | 0,115553143  | 7,277079146 | 0,860351949 | 0,964879845 |
| FXN       | -0,053701994 | 3,538583471 | 0,860397043 | 0,964879845 |
| PSME2     | 0,118861543  | 7,312667863 | 0,860497686 | 0,964879845 |
| RABAC1    | -0,051492949 | 7,378037992 | 0,860660757 | 0,964879845 |
| MFS10     | 0,132174382  | 5,657772141 | 0,860813953 | 0,964879845 |
| PPWD1     | 0,10947008   | 5,682175124 | 0,86095261  | 0,964879845 |
| SHROOM2   | -0,055780261 | 3,843821357 | 0,860966155 | 0,964879845 |
| SRI       | -0,049821307 | 6,97290373  | 0,860989364 | 0,964879845 |
| MLLT1     | -0,051500977 | 6,686370724 | 0,861019776 | 0,964879845 |
| GNPDA1    | 0,125756306  | 4,907589496 | 0,862150438 | 0,965457565 |
| ZNF304    | 0,14887527   | 4,517839994 | 0,862213005 | 0,965457565 |
| CNOT2     | -0,048452841 | 5,653392968 | 0,862234407 | 0,965457565 |
| TRAPPC6B  | -0,05330749  | 4,949996245 | 0,862335137 | 0,965457565 |
| APH1A     | -0,049933592 | 6,700987555 | 0,862350609 | 0,965457565 |
| SOX12     | 0,203501646  | 4,804003743 | 0,86238507  | 0,965457565 |
| CLTB      | -0,047623872 | 6,393540697 | 0,862526394 | 0,965457565 |
| CUTA      | -0,0474575   | 7,233553125 | 0,862896363 | 0,965677102 |

|           |              |             |             |             |
|-----------|--------------|-------------|-------------|-------------|
| ITGA7     | 0,350645229  | 5,593356534 | 0,863005757 | 0,965677102 |
| PSMB10    | 0,10914975   | 6,821224646 | 0,863869104 | 0,966065093 |
| SCAF1     | -0,048931504 | 5,240763552 | 0,864025228 | 0,966065093 |
| HMOX2     | -0,046159647 | 6,871094762 | 0,864039429 | 0,966065093 |
| PSENN     | 0,097806325  | 6,60352752  | 0,86404379  | 0,966065093 |
| KIAA0528  | -0,047006001 | 5,647638013 | 0,86406086  | 0,966065093 |
| EML3      | -0,04992339  | 5,270791147 | 0,864544295 | 0,966345373 |
| NMD3      | -0,044822094 | 6,466412554 | 0,864594973 | 0,966345373 |
| IFI6      | -0,044741634 | 7,517502202 | 0,864966743 | 0,966404893 |
| CISD3     | 0,15153383   | 5,089254456 | 0,865069968 | 0,966404893 |
| ZNF417    | -0,050893182 | 4,341194943 | 0,865073393 | 0,966404893 |
| FYB       | -0,048005308 | 7,074367118 | 0,86530275  | 0,966502777 |
| TMEM138   | -0,046773948 | 5,825521562 | 0,865523497 | 0,966539866 |
| DGCR8     | 0,142389354  | 5,349299451 | 0,86561944  | 0,966539866 |
| MAPKAP1   | -0,049115174 | 5,151507129 | 0,86600944  | 0,966817022 |
| ETF1      | -0,048340367 | 5,73820103  | 0,86634698  | 0,966822368 |
| YLPM1     | -0,04833083  | 5,131488791 | 0,866489636 | 0,966822368 |
| ZNF408    | 0,140081882  | 3,357527814 | 0,866560852 | 0,966822368 |
| FAM103A1  | 0,106255961  | 5,812142551 | 0,867087608 | 0,966822368 |
| FEZ2      | 0,185096138  | 6,099476459 | 0,867223416 | 0,966822368 |
| CFDP1     | -0,048824263 | 4,645941453 | 0,86724358  | 0,966822368 |
| SLC35F5   | -0,046784984 | 5,937863022 | 0,867574755 | 0,966822368 |
| GALK1     | 0,134563004  | 4,735810873 | 0,867785451 | 0,966822368 |
| RABIF     | -0,045016748 | 5,672394255 | 0,867906405 | 0,966822368 |
| NSF       | -0,048010168 | 5,129710651 | 0,867957709 | 0,966822368 |
| ECM1      | 0,236814965  | 6,249369182 | 0,867980454 | 0,966822368 |
| SOD1      | -0,045758628 | 7,327541686 | 0,86833985  | 0,966822368 |
| CEP135    | 0,115607331  | 4,385001334 | 0,868374218 | 0,966822368 |
| PTP4A1    | -0,042775773 | 7,148410316 | 0,868480603 | 0,966822368 |
| DYRK1A    | 0,112258913  | 6,19713209  | 0,868691342 | 0,966822368 |
| MED22     | 0,124167613  | 4,900433688 | 0,868741171 | 0,966822368 |
| CRAT      | 0,13913254   | 5,246294231 | 0,86874227  | 0,966822368 |
| PPP1CB    | -0,044336044 | 8,168290058 | 0,868744485 | 0,966822368 |
| PIKFYVE   | 0,119646468  | 6,73425662  | 0,86899583  | 0,966822368 |
| TCF3      | -0,048026064 | 4,456734878 | 0,869007642 | 0,966822368 |
| SMC6      | 0,138547332  | 6,029093181 | 0,869102718 | 0,966822368 |
| TNKS1BP1  | -0,045726744 | 6,023563624 | 0,869133468 | 0,966822368 |
| USP40     | -0,048513205 | 5,192821377 | 0,869396205 | 0,966956895 |
| RNF20     | 0,103657089  | 5,53022955  | 0,869875905 | 0,967332648 |
| PRKACA    | -0,044310233 | 5,663534074 | 0,870093439 | 0,967416788 |
| FAM21A    | -0,044445526 | 5,757809595 | 0,870555318 | 0,967615031 |
| TBC1D10B  | -0,044936503 | 5,450083725 | 0,870631637 | 0,967615031 |
| TP53BP1   | -0,045608217 | 5,417413216 | 0,870718222 | 0,967615031 |
| FBN1      | -0,041935153 | 6,707371071 | 0,870839338 | 0,967615031 |
| MRPS18B   | 0,108800407  | 6,881489361 | 0,871066062 | 0,967669185 |
| MAPK1IP1L | 0,10585372   | 8,6161381   | 0,871171891 | 0,967669185 |
| KIAA2013  | 0,108153141  | 7,323190463 | 0,871330787 | 0,967688052 |
| CDC23     | 0,10846879   | 4,831923289 | 0,87163539  | 0,967868706 |
| RINT1     | 0,15686073   | 4,83266745  | 0,871979042 | 0,968092655 |
| ABCC5     | 0,19305997   | 5,775296618 | 0,872196627 | 0,968176591 |

|           |              |             |             |             |
|-----------|--------------|-------------|-------------|-------------|
| DNMBP     | -0,044269168 | 4,463589239 | 0,872558464 | 0,9684206   |
| SART3     | -0,043117049 | 5,63352074  | 0,872817936 | 0,968528676 |
| VPS28     | 0,125598474  | 6,984479432 | 0,872939909 | 0,968528676 |
| MRAS      | 0,153099014  | 4,74890259  | 0,873133932 | 0,968586349 |
| WLS       | 0,171269096  | 7,360981994 | 0,873543614 | 0,968867364 |
| NFKB2     | -0,042469415 | 5,661896539 | 0,873671421 | 0,968867364 |
| CAP1      | 0,113251263  | 7,565190907 | 0,874194664 | 0,969289986 |
| HSPA13    | -0,043201152 | 5,230384665 | 0,874505492 | 0,969429899 |
| MAP1LC3B2 | 0,092778724  | 6,280198204 | 0,874605182 | 0,969429899 |
| RABGEF1   | 0,138399023  | 5,838694394 | 0,874991726 | 0,969588469 |
| FDX1      | 0,101701043  | 7,409500472 | 0,875539627 | 0,969588469 |
| WIPF2     | 0,099028864  | 4,20865435  | 0,875767313 | 0,969588469 |
| NDUFS3    | 0,084340842  | 6,802782858 | 0,875856867 | 0,969588469 |
| ATF6B     | -0,040718386 | 8,644075105 | 0,875900092 | 0,969588469 |
| NDUFV1    | 0,106543459  | 7,194251238 | 0,876254585 | 0,969588469 |
| METTL4    | 0,132955662  | 4,063582947 | 0,876375852 | 0,969588469 |
| PPP2CB    | -0,040618857 | 7,821743027 | 0,876603544 | 0,969588469 |
| DNAJC1    | -0,04160385  | 5,661624167 | 0,876684458 | 0,969588469 |
| NDUFA13   | 0,10455929   | 8,619712311 | 0,876689672 | 0,969588469 |
| DERA      | 0,117277549  | 5,023942292 | 0,876715249 | 0,969588469 |
| PLS3      | 0,110871342  | 8,40781382  | 0,87684079  | 0,969588469 |
| ASB8      | -0,045184708 | 3,737896252 | 0,876873569 | 0,969588469 |
| FMNL3     | 0,134662401  | 7,125903191 | 0,876914411 | 0,969588469 |
| NAV1      | 0,131896332  | 5,813938844 | 0,877018739 | 0,969588469 |
| PQLC2     | 0,10154971   | 6,048625385 | 0,87702327  | 0,969588469 |
| DHX9      | 0,083753729  | 6,51019235  | 0,877357734 | 0,969801003 |
| BMPR2     | 0,090014148  | 6,681937701 | 0,877759434 | 0,970087777 |
| NCLN      | -0,039743701 | 6,350926586 | 0,878100449 | 0,970307399 |
| ELF4      | 0,111920737  | 5,909446719 | 0,878675709 | 0,970722274 |
| CES2      | 0,103437146  | 5,197120902 | 0,878848977 | 0,970722274 |
| MLST8     | -0,040472295 | 5,640028291 | 0,878952122 | 0,970722274 |
| CCDC6     | 0,097871781  | 6,08823936  | 0,879096584 | 0,970722274 |
| PTDSS2    | 0,10972798   | 4,386078655 | 0,879187676 | 0,970722274 |
| TTC1      | -0,039159082 | 5,627352776 | 0,879336507 | 0,970729422 |
| ADAP2     | -0,039180223 | 5,263157489 | 0,879722754 | 0,970969759 |
| CSNK2B    | -0,036906584 | 7,470776998 | 0,879839    | 0,970969759 |
| RASAL2    | -0,040195954 | 4,83329453  | 0,88013512  | 0,971139382 |
| FAM185A   | -0,034543518 | 4,536670286 | 0,880287424 | 0,97115029  |
| CXXC5     | -0,03822653  | 5,071160062 | 0,880895718 | 0,971625542 |
| P2RX4     | -0,03921342  | 4,917831555 | 0,881178784 | 0,971625542 |
| TMED7     | 0,110450278  | 7,348554774 | 0,881242494 | 0,971625542 |
| TRAPPC1   | -0,028597062 | 7,30095372  | 0,88169781  | 0,971625542 |
| STAB1     | 0,158647386  | 6,975352174 | 0,881727012 | 0,971625542 |
| DCHS1     | 0,216979205  | 6,054805133 | 0,881891569 | 0,971625542 |
| NANOG     | -0,04106459  | 4,877599527 | 0,882022174 | 0,971625542 |
| CHCHD10   | -0,036667454 | 6,451741121 | 0,882523246 | 0,971625542 |
| POLDIP3   | -0,036951434 | 6,013035272 | 0,882721781 | 0,971625542 |
| KAT5      | -0,036982941 | 5,103007728 | 0,88299782  | 0,971625542 |
| HEATR3    | 0,162235057  | 3,545690897 | 0,883053117 | 0,971625542 |
| IL15RA    | -0,034736753 | 6,231667284 | 0,883210896 | 0,971625542 |

|         |              |             |             |             |
|---------|--------------|-------------|-------------|-------------|
| ANPEP   | -0,023553967 | 5,61143817  | 0,883224122 | 0,971625542 |
| RFC1    | 0,093384494  | 5,851078719 | 0,883397557 | 0,971625542 |
| FH      | 0,124096604  | 4,256309959 | 0,883448431 | 0,971625542 |
| CPT2    | -0,039360615 | 4,367400394 | 0,883534261 | 0,971625542 |
| PTPRK   | 0,097912509  | 5,568436159 | 0,883796166 | 0,971625542 |
| C9orf89 | 0,111932311  | 5,251074495 | 0,8839373   | 0,971625542 |
| RIOK2   | -0,035956162 | 4,59003767  | 0,883968961 | 0,971625542 |
| GBP2    | 0,122297685  | 8,238955937 | 0,884045233 | 0,971625542 |
| STX7    | -0,035756525 | 6,786074357 | 0,884086698 | 0,971625542 |
| FAM126A | -0,032136224 | 6,355519831 | 0,884103214 | 0,971625542 |
| PSMB9   | 0,126197012  | 6,302750261 | 0,884143101 | 0,971625542 |
| RAB2A   | -0,035643257 | 6,286941137 | 0,884214526 | 0,971625542 |
| CLK2    | -0,031516499 | 5,918565767 | 0,884280409 | 0,971625542 |
| PYROXD1 | -0,036006224 | 5,578205905 | 0,884605756 | 0,971826429 |
| CHIC1   | -0,041554523 | 3,639002836 | 0,885593928 | 0,972662969 |
| GNAI2   | -0,034516712 | 10,41351278 | 0,885652497 | 0,972662969 |
| MEST    | 0,183869617  | 7,42619197  | 0,886570083 | 0,97312468  |
| COX6A1  | 0,094847858  | 10,15076929 | 0,88662302  | 0,97312468  |
| AGPAT3  | 0,085910453  | 6,055252141 | 0,886626498 | 0,97312468  |
| PTPMT1  | 0,097774788  | 5,953342305 | 0,886643736 | 0,97312468  |
| BBX     | 0,092735644  | 6,76028538  | 0,886959101 | 0,973314147 |
| TOX4    | 0,077084987  | 7,538645876 | 0,887158065 | 0,973335702 |
| AMOTL1  | -0,030914139 | 5,429774334 | 0,887264221 | 0,973335702 |
| EPCAM   | 0,183690556  | 6,626203958 | 0,887822705 | 0,973791705 |
| WDR47   | -0,033894628 | 4,455255222 | 0,888043678 | 0,973877427 |
| SCMH1   | -0,032918606 | 6,130570377 | 0,888258381 | 0,973956247 |
| RRP7B   | -0,029437863 | 5,759557151 | 0,888534232 | 0,974102078 |
| BRD3    | -0,033569484 | 4,882655038 | 0,888694017 | 0,97412064  |
| DDX41   | -0,034478375 | 5,249708283 | 0,889062094 | 0,97429243  |
| ITFG1   | 0,154447387  | 8,004323445 | 0,88919817  | 0,97429243  |
| CORO1A  | -0,029515699 | 5,738557091 | 0,88931244  | 0,97429243  |
| THG1L   | -0,033950773 | 4,828460537 | 0,889422257 | 0,97429243  |
| SF3B1   | 0,099185736  | 9,207564275 | 0,889960548 | 0,974320338 |
| MEF2A   | 0,096386004  | 5,104333808 | 0,890311471 | 0,974320338 |
| ALG14   | 0,108844371  | 3,827387899 | 0,890520679 | 0,974320338 |
| NDUFB1  | 0,101937951  | 7,402651695 | 0,890556228 | 0,974320338 |
| MAPK13  | 0,133955384  | 5,924116559 | 0,890661744 | 0,974320338 |
| STRN    | 0,118280358  | 5,028462444 | 0,890746393 | 0,974320338 |
| USP35   | 0,116420987  | 5,167451579 | 0,890992464 | 0,974320338 |
| RNF103  | -0,036024217 | 4,207298302 | 0,891048155 | 0,974320338 |
| TMEM203 | 0,104500594  | 5,785963961 | 0,891071318 | 0,974320338 |
| NDUFA12 | 0,085595536  | 6,710553217 | 0,891162427 | 0,974320338 |
| HOMER3  | 0,172643877  | 7,229880344 | 0,891210992 | 0,974320338 |
| TCIRG1  | 0,115169514  | 7,661204922 | 0,891269393 | 0,974320338 |
| CASD1   | 0,100882526  | 5,588208949 | 0,891443601 | 0,974320338 |
| PHF5A   | 0,089113299  | 5,236506071 | 0,89174141  | 0,974320338 |
| FAM104A | -0,03298981  | 4,643533607 | 0,891902066 | 0,974320338 |
| CTBP1   | -0,030929965 | 8,245344017 | 0,891945501 | 0,974320338 |
| CTSC    | -0,029584628 | 8,287293942 | 0,892041289 | 0,974320338 |
| SYS1    | 0,088379045  | 5,989885038 | 0,89228638  | 0,974320338 |

|          |              |             |             |             |
|----------|--------------|-------------|-------------|-------------|
| DDB1     | -0,031216572 | 6,97443307  | 0,892386757 | 0,974320338 |
| SSBP2    | -0,03120728  | 6,36291753  | 0,892541135 | 0,974320338 |
| PTGES2   | -0,028810731 | 4,657048179 | 0,89269117  | 0,974320338 |
| CISD1    | 0,101188054  | 5,87031615  | 0,892731304 | 0,974320338 |
| SRPX2    | 0,130769183  | 5,692655454 | 0,892734048 | 0,974320338 |
| SHPRH    | 0,08844358   | 4,407134943 | 0,893043745 | 0,974502368 |
| DMXL2    | -0,030531879 | 5,508607903 | 0,893344904 | 0,974675025 |
| BMP2K    | 0,092346675  | 5,946845145 | 0,893595832 | 0,974717408 |
| FLJ10038 | -0,030389897 | 5,561129368 | 0,89373555  | 0,974717408 |
| ACTG1    | 0,114122424  | 12,41994688 | 0,893891956 | 0,974717408 |
| FAM58A   | 0,096081978  | 4,24043444  | 0,893955517 | 0,974717408 |
| PRPSAP2  | 0,104057622  | 6,671289239 | 0,894261729 | 0,97488501  |
| GSK3A    | 0,088096776  | 7,578742759 | 0,894599166 | 0,97488501  |
| SUPT7L   | 0,105823033  | 4,872100395 | 0,894698117 | 0,97488501  |
| RRAGB    | -0,03144805  | 5,07271553  | 0,894731733 | 0,97488501  |
| FAM172A  | -0,030385208 | 5,496236213 | 0,894824061 | 0,97488501  |
| RAB21    | -0,030126424 | 5,798876125 | 0,89497057  | 0,974888869 |
| ROCK2    | 0,091782898  | 6,856320262 | 0,8952406   | 0,974930044 |
| DECR2    | 0,114723327  | 5,961000281 | 0,895294315 | 0,974930044 |
| SDC1     | 0,251382609  | 5,492005675 | 0,895951638 | 0,975340618 |
| ZC3H11A  | 0,078733994  | 7,125988438 | 0,896206194 | 0,975340618 |
| DCUN1D4  | 0,105873109  | 4,766577538 | 0,896298931 | 0,975340618 |
| C1orf50  | 0,102568155  | 4,465211106 | 0,896403446 | 0,975340618 |
| NEK9     | -0,029097077 | 5,237087674 | 0,896628762 | 0,975340618 |
| RHOC     | 0,10822062   | 8,331219168 | 0,896803909 | 0,975340618 |
| CTPS2    | -0,025354247 | 6,676999942 | 0,896846851 | 0,975340618 |
| POLR3E   | 0,107225323  | 4,083561864 | 0,896877675 | 0,975340618 |
| IFT80    | 0,127176724  | 5,661795548 | 0,897045572 | 0,975340618 |
| RASAL3   | -0,026678967 | 5,100333445 | 0,89710168  | 0,975340618 |
| MTMR6    | 0,067029984  | 5,339363298 | 0,897356627 | 0,975420194 |
| DHODH    | -0,029442973 | 4,383106742 | 0,897754691 | 0,975420194 |
| ZNF692   | 0,121646994  | 5,906696943 | 0,89778582  | 0,975420194 |
| GUSB     | -0,028160042 | 6,111048592 | 0,897922378 | 0,975420194 |
| HPS6     | -0,029545535 | 5,275559026 | 0,898021203 | 0,975420194 |
| ACD      | -0,028477912 | 4,738657585 | 0,89803314  | 0,975420194 |
| MAFB     | 0,134482034  | 6,568027223 | 0,898217838 | 0,975455326 |
| MT1X     | 0,154698428  | 6,561103843 | 0,898351583 | 0,975455326 |
| ZSWIM6   | 0,109046422  | 6,351497744 | 0,898602769 | 0,975572725 |
| EEF1D    | -0,024972713 | 7,833788927 | 0,899129381 | 0,975989056 |
| CTSB     | -0,021469033 | 9,095001178 | 0,899470491 | 0,976203928 |
| FABP5    | -0,004615633 | 8,468683734 | 0,899834612 | 0,976443701 |
| SEC23B   | -0,027142761 | 4,215296737 | 0,900290675 | 0,976783152 |
| GNB1     | 0,101118973  | 7,492705311 | 0,900680022 | 0,977007775 |
| UBR2     | -0,027000181 | 5,270505866 | 0,900784262 | 0,977007775 |
| SLU7     | -0,026699084 | 5,755405791 | 0,901462218 | 0,977491992 |
| GLS      | 0,07366718   | 7,961716085 | 0,901517398 | 0,977491992 |
| TYMP     | 0,110845908  | 8,615264613 | 0,902428299 | 0,977564845 |
| PI4KA    | 0,090494029  | 6,115178484 | 0,902697804 | 0,977564845 |
| KIF16B   | -0,01901168  | 4,450019926 | 0,902787099 | 0,977564845 |
| RBPM52   | 0,001012764  | 6,176866909 | 0,902906132 | 0,977564845 |

|           |              |             |             |             |
|-----------|--------------|-------------|-------------|-------------|
| USP33     | -0,024427633 | 6,686677624 | 0,902916542 | 0,977564845 |
| C11orf57  | 0,092653668  | 5,375243019 | 0,902955653 | 0,977564845 |
| TMEM9     | -0,024469801 | 5,789272414 | 0,903018022 | 0,977564845 |
| ASNS      | -0,022323277 | 5,651419098 | 0,903042842 | 0,977564845 |
| PDGFA     | -0,014224621 | 7,597894211 | 0,903318198 | 0,977564845 |
| ATP5G2    | -0,023713776 | 8,379402278 | 0,90349098  | 0,977564845 |
| RELT      | 0,102368734  | 3,206742949 | 0,903577714 | 0,977564845 |
| RNF144A   | -0,016665821 | 4,505282985 | 0,903806897 | 0,977564845 |
| NOMO1     | 0,088162926  | 6,679297013 | 0,904187939 | 0,977564845 |
| KIAA0100  | -0,02008049  | 5,980640177 | 0,904231635 | 0,977564845 |
| ACAP2     | 0,08201157   | 6,139608524 | 0,904299794 | 0,977564845 |
| RPS27A    | 0,084341099  | 10,29513019 | 0,904355524 | 0,977564845 |
| PTPN4     | 0,090973704  | 6,273811082 | 0,904381277 | 0,977564845 |
| PPIL2     | -0,021169308 | 4,631062622 | 0,904463523 | 0,977564845 |
| LUC7L     | -0,023655217 | 6,936902613 | 0,90446879  | 0,977564845 |
| MYD88     | 0,073043361  | 5,488854579 | 0,904595683 | 0,977564845 |
| RPL13AP20 | 0,07314221   | 8,843364101 | 0,904655538 | 0,977564845 |
| HIGD1A    | 0,107465829  | 3,831137311 | 0,905286637 | 0,977564845 |
| SRA1      | -0,016056603 | 4,64729289  | 0,905325475 | 0,977564845 |
| GALNT11   | 0,091851622  | 5,341323353 | 0,905442818 | 0,977564845 |
| C5orf24   | 0,114627422  | 6,797441497 | 0,905447278 | 0,977564845 |
| B3GALNT2  | 0,146770904  | 4,962943303 | 0,905522323 | 0,977564845 |
| PLOD3     | 0,155570415  | 5,361873797 | 0,905661203 | 0,977564845 |
| ZBTB11    | -0,023906497 | 5,223204183 | 0,905710153 | 0,977564845 |
| MBD2      | -0,022236836 | 7,756344957 | 0,905821591 | 0,977564845 |
| EDC4      | -0,021512621 | 4,698665448 | 0,906110466 | 0,977564845 |
| MX1       | 0,143882838  | 6,568278826 | 0,906131866 | 0,977564845 |
| ADI1      | -0,022146996 | 6,196489384 | 0,906309541 | 0,977564845 |
| FAM32A    | -0,023625348 | 6,149077061 | 0,906315435 | 0,977564845 |
| DHX35     | -0,021568297 | 4,780428361 | 0,906985845 | 0,97813324  |
| FXC1      | 0,096304065  | 7,01747082  | 0,907598254 | 0,978599144 |
| ENC1      | -0,017430097 | 6,046773513 | 0,907745549 | 0,978599144 |
| SCAP      | -0,020491403 | 7,011772273 | 0,907848392 | 0,978599144 |
| SDHAF1    | 0,090803256  | 5,257331701 | 0,908005189 | 0,978613463 |
| RRN3      | 0,096248916  | 5,634545305 | 0,908736991 | 0,979247399 |
| RBM27     | -0,024489879 | 5,486466718 | 0,909288381 | 0,979299641 |
| TAF4B     | -0,025098493 | 2,843326819 | 0,909349276 | 0,979299641 |
| TBCB      | -0,023158422 | 5,447679686 | 0,909415072 | 0,979299641 |
| MPZL1     | -0,020064614 | 5,566685571 | 0,909433111 | 0,979299641 |
| SOCS7     | 0,07669067   | 5,300558854 | 0,909533497 | 0,979299641 |
| STC1      | -0,008821281 | 6,393419265 | 0,909924658 | 0,979299641 |
| SMARCA5   | -0,007499058 | 7,083124748 | 0,909946785 | 0,979299641 |
| PKIA      | 0,157619135  | 5,149560022 | 0,910013299 | 0,979299641 |
| PML       | 0,095113699  | 5,837788956 | 0,910199533 | 0,979299641 |
| SYVN1     | 0,079594144  | 5,758429477 | 0,910335845 | 0,979299641 |
| KIAA1377  | -0,025736279 | 3,964863664 | 0,910448055 | 0,979299641 |
| PTPLB     | 0,098432782  | 5,209345933 | 0,910508832 | 0,979299641 |
| LRP11     | -0,009103986 | 5,80349675  | 0,91081652  | 0,979400814 |
| DHCR7     | 0,144307544  | 5,371899812 | 0,910890154 | 0,979400814 |
| NDUFA10   | -0,020876658 | 6,02059182  | 0,911443983 | 0,979841797 |



|          |              |             |             |             |
|----------|--------------|-------------|-------------|-------------|
| GBF1     | -0,019630164 | 6,315926048 | 0,911841912 | 0,979979775 |
| SAE1     | 0,132659107  | 5,645171197 | 0,912035727 | 0,979979775 |
| ATRN     | 0,087317966  | 5,726969732 | 0,912346468 | 0,979979775 |
| AKAP11   | 0,081471834  | 5,460617339 | 0,912352941 | 0,979979775 |
| PARP14   | 0,070403443  | 7,674691305 | 0,912360857 | 0,979979775 |
| MAN2B2   | -0,017617217 | 5,485952294 | 0,912434608 | 0,979979775 |
| FAM165B  | -0,016057885 | 5,818850835 | 0,912596544 | 0,979999344 |
| SLAIN2   | -0,019535618 | 7,495107409 | 0,912791661 | 0,980054532 |
| TNKS2    | 0,070820325  | 6,746123129 | 0,913013784 | 0,980138695 |
| CORO1C   | 0,077637855  | 7,654310666 | 0,913231317 | 0,980198527 |
| BIN2     | -0,017219581 | 5,047843876 | 0,913433773 | 0,980198527 |
| ZNF506   | -0,011302894 | 6,262440318 | 0,913541722 | 0,980198527 |
| ZNF136   | -0,020109828 | 3,742978461 | 0,913644499 | 0,980198527 |
| PDCD6IP  | -0,018221636 | 7,731424546 | 0,9139762   | 0,980269753 |
| EXOC1    | -0,021807512 | 4,389939896 | 0,9140681   | 0,980269753 |
| COL6A1   | 0,184089247  | 7,52369015  | 0,914142156 | 0,980269753 |
| GPR107   | 0,068486651  | 6,082871517 | 0,914297674 | 0,980282364 |
| SURF2    | -0,02111847  | 3,66103983  | 0,914734635 | 0,980515803 |
| DCTN5    | 0,072160926  | 5,928882852 | 0,914993761 | 0,980515803 |
| ATE1     | -0,026024995 | 3,589134052 | 0,914994972 | 0,980515803 |
| PLK1S1   | -0,015513836 | 4,615319659 | 0,915217434 | 0,980515803 |
| N6AMT1   | 0,123678138  | 4,435063998 | 0,915234358 | 0,980515803 |
| SEC61A1  | 0,086622758  | 8,881824085 | 0,915614677 | 0,980769162 |
| PTEN     | -0,005816101 | 7,711870367 | 0,915815377 | 0,980797901 |
| XRN1     | -0,013003002 | 5,105269446 | 0,915959081 | 0,980797901 |
| GNG10    | 0,084193554  | 7,931407342 | 0,9162863   | 0,980797901 |
| HMGN4    | 0,076805462  | 5,822657434 | 0,916312519 | 0,980797901 |
| MMGT1    | -0,014788019 | 6,123439361 | 0,916360673 | 0,980797901 |
| APPBP2   | 0,06828815   | 6,611736722 | 0,916636071 | 0,980925489 |
| RSRC2    | -0,018405986 | 6,199051713 | 0,916767582 | 0,980925489 |
| AKAP1    | 0,15940248   | 5,978169901 | 0,917087355 | 0,981113692 |
| B4GALT5  | 0,079557981  | 6,139948583 | 0,917287027 | 0,98117337  |
| SMAD4    | 0,08231702   | 5,48402267  | 0,917586594 | 0,981196477 |
| MRRF     | -0,016646344 | 4,793274835 | 0,917596412 | 0,981196477 |
| C19orf6  | 0,094132695  | 7,281194575 | 0,918909607 | 0,982166628 |
| TCEA3    | -0,008811658 | 6,717709322 | 0,918946579 | 0,982166628 |
| POU2F2   | 0,115882762  | 5,122433347 | 0,918995339 | 0,982166628 |
| HSBP1L1  | 0,111718702  | 4,057467462 | 0,919346552 | 0,982166628 |
| TERF2    | 0,063327058  | 5,913251577 | 0,919394459 | 0,982166628 |
| GNS      | 0,071752824  | 7,176338853 | 0,919681857 | 0,982166628 |
| PEX3     | -0,014084683 | 4,84564904  | 0,919749735 | 0,982166628 |
| ITPR2    | 0,086240523  | 5,962447245 | 0,919864412 | 0,982166628 |
| VPS37C   | 0,091683436  | 5,021023973 | 0,919931458 | 0,982166628 |
| WASF2    | 0,089286213  | 6,143205059 | 0,92000897  | 0,982166628 |
| AKR1A1   | -0,016810307 | 6,762963788 | 0,920088051 | 0,982166628 |
| TXNL1    | 0,072195772  | 5,566338156 | 0,920564149 | 0,982521041 |
| DIS3L    | 0,091729878  | 5,353839701 | 0,921230532 | 0,982992416 |
| IL4R     | 0,075782294  | 6,635990649 | 0,921294109 | 0,982992416 |
| PPTC7    | 0,070366152  | 6,372767081 | 0,921513042 | 0,983025778 |
| PPAPDC1B | 0,095578055  | 4,820006359 | 0,921613697 | 0,983025778 |

|           |              |             |             |             |
|-----------|--------------|-------------|-------------|-------------|
| ETFA      | -0,015823478 | 5,816374977 | 0,922029081 | 0,983172261 |
| ZC3HAV1   | 0,069298478  | 5,637721232 | 0,922039391 | 0,983172261 |
| ELMO3     | -0,013353581 | 4,545360813 | 0,922235964 | 0,983228117 |
| DNAJC15   | -0,001856571 | 5,616403545 | 0,92291171  | 0,98379474  |
| C20orf111 | 0,075590611  | 5,541279436 | 0,9230719   | 0,983811704 |
| FAM160B1  | 0,061197776  | 5,411200914 | 0,92397546  | 0,984620826 |
| PLEKHA4   | -0,007660807 | 4,892258487 | 0,924120083 | 0,984621069 |
| PCMTD2    | -0,010941362 | 6,142496592 | 0,924830644 | 0,985082654 |
| VDR       | 0,106808745  | 5,977673413 | 0,925157952 | 0,985082654 |
| ELK3      | -0,009268652 | 7,782742628 | 0,925233463 | 0,985082654 |
| XRCC1     | -0,013831889 | 4,901158166 | 0,925236059 | 0,985082654 |
| TBC1D14   | -0,012803408 | 4,969606093 | 0,925297614 | 0,985082654 |
| CTR9      | 0,083079927  | 5,152230153 | 0,925420074 | 0,985082654 |
| IKBKAP    | -0,009060203 | 5,018082747 | 0,926415529 | 0,985988371 |
| PGS1      | 0,083405139  | 5,974327861 | 0,926819899 | 0,986041876 |
| STK38     | 0,092084763  | 4,943029196 | 0,926845855 | 0,986041876 |
| MAN2A1    | -0,000936347 | 6,366833475 | 0,926899608 | 0,986041876 |
| MED9      | 0,122821577  | 4,262504263 | 0,927333856 | 0,986349956 |
| FBXO7     | -0,012075018 | 7,058309776 | 0,927608189 | 0,986487873 |
| ZNF613    | -0,011402573 | 3,591252603 | 0,92797667  | 0,986725856 |
| ZBTB33    | 0,112942025  | 5,950695221 | 0,928454394 | 0,987003895 |
| XPC       | -0,011151577 | 5,929561707 | 0,928793324 | 0,987003895 |
| MORC3     | 0,070462964  | 6,292630919 | 0,928989123 | 0,987003895 |
| RAB3GAP1  | -0,010374292 | 6,122904351 | 0,929283805 | 0,987003895 |
| COX17     | -0,007570775 | 7,079159793 | 0,92930143  | 0,987003895 |
| TRPC4AP   | 0,067489603  | 7,093933526 | 0,929381416 | 0,987003895 |
| DRG2      | -0,006482393 | 3,982148618 | 0,929514537 | 0,987003895 |
| CYP4V2    | -0,008004059 | 4,876669137 | 0,929622375 | 0,987003895 |
| RNMT      | -0,008578115 | 3,333760554 | 0,9298711   | 0,987003895 |
| CD300A    | -0,010849101 | 4,848679008 | 0,929923635 | 0,987003895 |
| NUAK1     | 0,086828849  | 6,07568006  | 0,92993362  | 0,987003895 |
| CWC25     | -0,010554764 | 5,628273532 | 0,930487965 | 0,987003895 |
| TMEM185A  | 0,091465724  | 4,651152053 | 0,930529439 | 0,987003895 |
| UBTF      | -0,009385918 | 5,771241866 | 0,930664289 | 0,987003895 |
| KIAA0196  | -0,009468282 | 5,695749559 | 0,930673906 | 0,987003895 |
| SIN3A     | -0,001031816 | 5,935108676 | 0,930820497 | 0,987003895 |
| ZNF121    | -0,004311203 | 5,636720035 | 0,930892372 | 0,987003895 |
| ZMIZ2     | -0,011726948 | 6,977968073 | 0,930999869 | 0,987003895 |
| ICT1      | -0,010183262 | 5,483425004 | 0,93112992  | 0,987003895 |
| USP11     | 0,084217099  | 7,205993951 | 0,931454703 | 0,987003895 |
| DDX18     | 0,067565536  | 4,303516183 | 0,931688632 | 0,987003895 |
| TMEM55A   | -0,010351613 | 4,960823449 | 0,931745283 | 0,987003895 |
| SERGEF    | -0,006297096 | 4,925817376 | 0,931771589 | 0,987003895 |
| NDUFA6    | -0,007832629 | 6,969619827 | 0,932120383 | 0,987003895 |
| DST       | 0,104064758  | 7,36615015  | 0,932191807 | 0,987003895 |
| RPL12     | -0,00691136  | 9,814973556 | 0,932490479 | 0,987003895 |
| CEP350    | -0,009752924 | 5,889957763 | 0,932639208 | 0,987003895 |
| POLE3     | 5,12563E-05  | 5,710312203 | 0,932733114 | 0,987003895 |
| RAB40C    | -0,004869609 | 5,807423971 | 0,932774792 | 0,987003895 |
| PRKX      | 0,15433051   | 5,643911771 | 0,933028421 | 0,987003895 |

|           |              |             |             |             |
|-----------|--------------|-------------|-------------|-------------|
| USP15     | 0,093504558  | 5,41915877  | 0,933175193 | 0,987003895 |
| LOC493754 | 0,102274647  | 4,317903351 | 0,933226584 | 0,987003895 |
| LAP3      | 0,00047134   | 7,556929492 | 0,933355681 | 0,987003895 |
| CASP8AP2  | 0,094365519  | 5,317968931 | 0,933410882 | 0,987003895 |
| PCCB      | -0,003697474 | 4,574393511 | 0,933451311 | 0,987003895 |
| ZBTB45    | 0,077083714  | 4,787769422 | 0,933636545 | 0,987003895 |
| SPCS2     | -0,006803788 | 7,602087532 | 0,933689588 | 0,987003895 |
| MSL2      | -0,002631712 | 6,81592676  | 0,933905403 | 0,987003895 |
| TET2      | -0,006419206 | 4,923734399 | 0,934058153 | 0,987003895 |
| WWTR1     | 0,090225347  | 8,693468043 | 0,934342404 | 0,987003895 |
| LYRM2     | -0,006902188 | 5,865986607 | 0,934430894 | 0,987003895 |
| CSTB      | 0,100411442  | 10,4043032  | 0,934707068 | 0,987003895 |
| JHDM1D    | -0,004605267 | 6,220247639 | 0,934801061 | 0,987003895 |
| VTI1B     | -0,003769057 | 5,786324981 | 0,934808743 | 0,987003895 |
| GEM       | 0,09157968   | 6,520112082 | 0,935220235 | 0,987003895 |
| PLAT      | 0,121159278  | 6,462208703 | 0,935231268 | 0,987003895 |
| HGS       | -0,003978961 | 4,812121363 | 0,935356506 | 0,987003895 |
| LSM7      | -0,003567217 | 6,669340115 | 0,935389578 | 0,987003895 |
| DCAF7     | -0,005006044 | 5,787457021 | 0,935469114 | 0,987003895 |
| RPL36     | 0,07301626   | 10,62965433 | 0,935475315 | 0,987003895 |
| FAF1      | 0,061466943  | 5,745675502 | 0,935795156 | 0,987058104 |
| SNX17     | 0,064210319  | 6,729892844 | 0,935848829 | 0,987058104 |
| KIAA0232  | -0,006017253 | 4,74410601  | 0,9360489   | 0,987058104 |
| ABHD3     | 0,090942422  | 5,217295727 | 0,93627414  | 0,987058104 |
| UHRF2     | -0,004218054 | 6,63793573  | 0,936276167 | 0,987058104 |
| NFKBIL1   | 0,091960119  | 5,320708155 | 0,936395201 | 0,987058104 |
| COX6B1    | 0,077106756  | 8,796929223 | 0,936830522 | 0,987364347 |
| EEF2      | 0,080057278  | 10,77119647 | 0,93705501  | 0,98738445  |
| MBTPS2    | 0,085075707  | 4,63610763  | 0,937236768 | 0,98738445  |
| GGPS1     | 0,118503302  | 4,97941525  | 0,937283993 | 0,98738445  |
| AURKAIP1  | 0,081183617  | 6,344254828 | 0,937658069 | 0,987625946 |
| ANKRD28   | -0,002415066 | 4,451721171 | 0,938033278 | 0,98786856  |
| ZNF277    | 0,069156578  | 5,272352826 | 0,938661918 | 0,988377952 |
| RAB27A    | 0,09342908   | 6,527074508 | 0,939172569 | 0,988552342 |
| ZNF830    | 0,082031162  | 4,748417515 | 0,939420273 | 0,988552342 |
| TCTN2     | -0,001967888 | 5,032350274 | 0,939508718 | 0,988552342 |
| XRCC6     | -0,004458701 | 8,399463387 | 0,939625927 | 0,988552342 |
| SCCPDH    | -0,004120763 | 6,397233666 | 0,939688243 | 0,988552342 |
| MFGE8     | 0,010871324  | 8,018294328 | 0,93970625  | 0,988552342 |
| SUPT6H    | 0,066625866  | 7,225660689 | 0,939842328 | 0,988552342 |
| NRIP1     | -0,00629589  | 6,460830653 | 0,940566545 | 0,989161516 |
| MDH2      | 0,071324463  | 7,343023992 | 0,940962231 | 0,989405806 |
| USP10     | 0,06935565   | 4,964039372 | 0,941204169 | 0,989405806 |
| COX7C     | -0,00510563  | 8,034459329 | 0,94123412  | 0,989405806 |
| ATP13A1   | -0,000356299 | 6,173795478 | 0,941383991 | 0,989410825 |
| MAX       | 0,075092207  | 5,169433861 | 0,942401672 | 0,990124641 |
| EIF2C4    | 0,002053484  | 6,179395503 | 0,942527603 | 0,990124641 |
| ARHGAP23  | 0,004748131  | 7,254187711 | 0,942636995 | 0,990124641 |
| KIAA1598  | 0,017284873  | 6,011145823 | 0,94264396  | 0,990124641 |
| MPV17     | -0,002943758 | 5,674573219 | 0,943558879 | 0,990852737 |

|          |              |             |             |             |
|----------|--------------|-------------|-------------|-------------|
| MTMR12   | 0,059002703  | 5,834713887 | 0,943627756 | 0,990852737 |
| ATF6     | 0,006921133  | 5,862917076 | 0,943893726 | 0,990862705 |
| DCTD     | 0,069386957  | 7,163957839 | 0,943927868 | 0,990862705 |
| C5orf22  | 0,001812268  | 4,405781531 | 0,944166044 | 0,990960174 |
| WIZ      | 0,062916326  | 6,993584618 | 0,944711526 | 0,990978969 |
| U2AF2    | -0,000876082 | 6,594261388 | 0,944794259 | 0,990978969 |
| EAF1     | -0,001106156 | 5,480588519 | 0,945164047 | 0,990978969 |
| TMEM165  | 0,067107398  | 6,903738972 | 0,945212295 | 0,990978969 |
| HDAC2    | 0,067632102  | 6,333083515 | 0,945344222 | 0,990978969 |
| UBE2D3   | -0,00271034  | 8,957228471 | 0,945685064 | 0,990978969 |
| SEC22B   | -0,000239942 | 7,136229509 | 0,945806825 | 0,990978969 |
| DDX56    | -0,00067742  | 4,910946548 | 0,945809084 | 0,990978969 |
| HMGNI    | 0,004898951  | 6,38515487  | 0,945991767 | 0,990978969 |
| EVC      | 0,062360161  | 5,518450731 | 0,946021304 | 0,990978969 |
| PPDPF    | 0,092001168  | 9,613640136 | 0,946064276 | 0,990978969 |
| ZNF45    | 0,099222429  | 3,462851242 | 0,946163947 | 0,990978969 |
| UBE3A    | 0,061623732  | 5,981582523 | 0,946227224 | 0,990978969 |
| C2CD3    | 0,070220613  | 6,285158885 | 0,946241815 | 0,990978969 |
| SDHA     | -0,000731819 | 5,896350616 | 0,946363843 | 0,990978969 |
| CDH11    | 0,019133536  | 8,130712573 | 0,946610818 | 0,991085393 |
| PLAUR    | 0,076906954  | 7,880689549 | 0,947059281 | 0,991402708 |
| CHMP7    | 0,053407334  | 6,06580011  | 0,947402394 | 0,99145296  |
| PHC1     | 0,006580457  | 5,861888229 | 0,947645461 | 0,99145296  |
| PPP4R1   | 0,057617436  | 6,655807476 | 0,947652232 | 0,99145296  |
| HEXIM1   | 0,065757265  | 6,520825792 | 0,947688868 | 0,99145296  |
| KIAA1432 | -0,000519834 | 6,598538714 | 0,947951994 | 0,991576108 |
| DGAT1    | -0,006314247 | 3,211061975 | 0,948491625 | 0,991788285 |
| LPIN2    | 0,087962838  | 5,952775995 | 0,948596126 | 0,991788285 |
| TNRC18   | 0,087238198  | 6,035847274 | 0,948673757 | 0,991788285 |
| LTBP3    | 0,108234709  | 8,52888206  | 0,948736616 | 0,991788285 |
| VPS16    | 0,086268754  | 5,351345368 | 0,949148254 | 0,992066515 |
| GNG5     | 0,00470948   | 8,492505046 | 0,949572841 | 0,992358192 |
| IDH2     | 0,00978726   | 6,156331039 | 0,949888008 | 0,992465251 |
| OVCA2    | 0,069937048  | 4,689513412 | 0,949966372 | 0,992465251 |
| TCF12    | -0,002309169 | 5,822229027 | 0,950169947 | 0,992525868 |
| ETV6     | 0,009548695  | 6,928169098 | 0,950860885 | 0,9929477   |
| SEPT10   | 0,001757581  | 7,158459497 | 0,950865007 | 0,9929477   |
| GATAD2B  | 0,004339412  | 6,270583644 | 0,951220143 | 0,993166461 |
| EXOC2    | 0,00146504   | 6,381889186 | 0,951389797 | 0,993191522 |
| ADO      | -0,003452737 | 4,991771011 | 0,951864099 | 0,993495338 |
| RASL11A  | 0,108355718  | 6,620129502 | 0,951972216 | 0,993495338 |
| WDR61    | 0,000881319  | 6,255651869 | 0,952246996 | 0,993628415 |
| DHTKD1   | 0,084671554  | 4,333423944 | 0,952391161 | 0,993628415 |
| KIAA1737 | 0,014434835  | 6,305203185 | 0,953545487 | 0,994680538 |
| ZNF276   | 0,099885026  | 5,808393864 | 0,954018315 | 0,994895888 |
| CCNY     | 0,077466943  | 7,180116528 | 0,954043733 | 0,994895888 |
| HEBP1    | 0,008841067  | 5,92622454  | 0,954786721 | 0,995096916 |
| GOT2     | 0,073676202  | 5,687245609 | 0,954871437 | 0,995096916 |
| RPS25    | 0,065779455  | 10,67983458 | 0,954931815 | 0,995096916 |
| PSMA5    | 0,073423325  | 6,577868239 | 0,955020038 | 0,995096916 |

|          |             |             |             |             |
|----------|-------------|-------------|-------------|-------------|
| PRRC1    | 0,054243437 | 7,87726737  | 0,955225243 | 0,995096916 |
| CARS2    | 0,110152094 | 6,243463852 | 0,95525605  | 0,995096916 |
| MAP2K1   | 0,059905324 | 6,276745213 | 0,955258016 | 0,995096916 |
| GNA13    | 0,005956582 | 8,341660545 | 0,955527187 | 0,995158977 |
| FTSJD1   | 0,060443839 | 4,547933538 | 0,95564878  | 0,995158977 |
| CEP68    | 0,066036831 | 5,115157182 | 0,95575541  | 0,995158977 |
| PEG10    | 0,04734169  | 6,860192879 | 0,956043521 | 0,995306988 |
| PPFIA1   | 0,002396012 | 6,212574911 | 0,956318654 | 0,995441445 |
| SNX11    | 0,064028275 | 4,965020275 | 0,956487862 | 0,995453239 |
| ATL3     | 0,056784816 | 6,764466866 | 0,95662195  | 0,995453239 |
| UTP3     | 0,055164311 | 5,447009856 | 0,956772247 | 0,995457728 |
| CCDC50   | 0,062732096 | 7,487371923 | 0,957159556 | 0,995708774 |
| TM7SF3   | 0,065097364 | 6,11023859  | 0,957485778 | 0,995834651 |
| SSU72    | 0,003015747 | 7,756909746 | 0,957572637 | 0,995834651 |
| VPS37B   | 0,059453039 | 5,376426708 | 0,957800146 | 0,995852506 |
| RPL19    | 0,008568169 | 10,62101102 | 0,958020572 | 0,995852506 |
| CEP290   | 0,074730758 | 4,318239059 | 0,958027928 | 0,995852506 |
| EID1     | 0,008295374 | 6,909101828 | 0,958638141 | 0,996334932 |
| RPL18    | 0,070829968 | 10,61101109 | 0,958815168 | 0,996367058 |
| DAPK3    | 0,075024189 | 6,209990348 | 0,959328758 | 0,996386982 |
| MED19    | 0,063140198 | 5,790637554 | 0,959347523 | 0,996386982 |
| C3orf37  | 0,056711743 | 4,274759338 | 0,959403456 | 0,996386982 |
| ZBTB41   | 0,055158914 | 4,496642444 | 0,95943808  | 0,996386982 |
| DAD1     | 0,068142063 | 8,54279572  | 0,959564938 | 0,996386982 |
| EIF1     | 0,006241897 | 9,514197188 | 0,960280033 | 0,996742854 |
| USP22    | 0,010050938 | 7,00498122  | 0,960285541 | 0,996742854 |
| TMEM214  | 0,053719268 | 7,464298653 | 0,960346173 | 0,996742854 |
| ATHL1    | 0,085288637 | 5,994269321 | 0,961026629 | 0,997057167 |
| RNF25    | 0,054639653 | 5,735493653 | 0,961220753 | 0,997057167 |
| FAM54B   | 0,064745423 | 6,125123676 | 0,961221337 | 0,997057167 |
| PBX2     | 0,016407077 | 7,174099053 | 0,961233879 | 0,997057167 |
| SSNA1    | 0,003657744 | 6,901091289 | 0,961645201 | 0,99733211  |
| FUT11    | 0,017317701 | 6,752490257 | 0,96210177  | 0,997653888 |
| TMOD3    | 0,014989661 | 7,928509651 | 0,962831958 | 0,997955335 |
| COPS7B   | 0,063275992 | 4,767225988 | 0,962934287 | 0,997955335 |
| ARGLU1   | 0,090737517 | 6,396819118 | 0,962934746 | 0,997955335 |
| TM2D1    | 0,007563232 | 6,25345452  | 0,962977872 | 0,997955335 |
| ANGEL2   | 0,064235438 | 5,441811392 | 0,963795793 | 0,998555309 |
| CD47     | 0,020568859 | 8,023260533 | 0,963849691 | 0,998555309 |
| C11orf58 | 0,041725777 | 7,857251834 | 0,965008185 | 0,999356888 |
| PSIP1    | 0,105076969 | 5,236040649 | 0,965021272 | 0,999356888 |
| GAA      | 0,018830455 | 6,577326106 | 0,965063075 | 0,999356888 |
| WDR41    | 0,047876536 | 4,0385583   | 0,96532961  | 0,999481113 |
| NDFIP2   | 0,059114077 | 5,040344121 | 0,965554323 | 0,999562005 |
| FLNA     | 0,081734507 | 9,707554627 | 0,965897286 | 0,999765269 |
| MFS11    | 0,043102992 | 5,392459502 | 0,966216539 | 0,999943934 |
| TARBP1   | 0,101087565 | 5,796540953 | 0,966375732 | 0,999956922 |
| MBOAT1   | 0,066155416 | 4,739901716 | 0,966905822 | 1           |
| MRPL18   | 0,047409978 | 5,848051782 | 0,966915638 | 1           |
| RELA     | 0,051792181 | 6,461484964 | 0,967066715 | 1           |

|          |             |             |             |   |
|----------|-------------|-------------|-------------|---|
| SNF8     | 0,013226418 | 6,605782699 | 0,967179772 | 1 |
| GULP1    | 0,036502429 | 6,476491745 | 0,967386981 | 1 |
| EIF1B    | 0,012001665 | 7,08464313  | 0,967570558 | 1 |
| FN3KRP   | 0,089035241 | 4,453420776 | 0,967650555 | 1 |
| HIBCH    | 0,020794871 | 6,007958362 | 0,967714976 | 1 |
| ZNF24    | 0,007828866 | 5,939588879 | 0,968152189 | 1 |
| STXBP5   | 0,055872134 | 4,914370268 | 0,968296123 | 1 |
| LAMP1    | 0,182023152 | 6,300694462 | 0,968989729 | 1 |
| BIRC6    | 0,055210518 | 7,281879602 | 0,969076228 | 1 |
| BCAS2    | 0,021083293 | 7,41364698  | 0,969837583 | 1 |
| FADS2    | 0,056647944 | 6,951342231 | 0,970093476 | 1 |
| MLEC     | 0,011889464 | 7,171007667 | 0,970658197 | 1 |
| TAF12    | 0,056561295 | 5,85915157  | 0,97081901  | 1 |
| PSMF1    | 0,043823542 | 7,508338223 | 0,970862382 | 1 |
| MT2A     | 0,113070269 | 10,93034125 | 0,970907747 | 1 |
| COMMD8   | 0,092791939 | 3,888314316 | 0,970933717 | 1 |
| TTC17    | 0,063446507 | 5,537779465 | 0,971380725 | 1 |
| NAP1L5   | 0,068253233 | 4,666725875 | 0,971514163 | 1 |
| TMUB1    | 0,054516506 | 6,58938836  | 0,97166906  | 1 |
| MED6     | 0,044946625 | 5,739885628 | 0,971976472 | 1 |
| SRP9     | 0,045021841 | 8,765537618 | 0,972453574 | 1 |
| ARPC3    | 0,049543708 | 7,916302062 | 0,973328372 | 1 |
| MAZ      | 0,019843345 | 8,255168809 | 0,974569976 | 1 |
| RPS10    | 0,011750391 | 9,411272054 | 0,974770977 | 1 |
| C8orf33  | 0,093766822 | 4,683114255 | 0,974870275 | 1 |
| PPIA     | 0,069675068 | 9,592940194 | 0,974914919 | 1 |
| LPIN1    | 0,048200267 | 4,29959837  | 0,974935211 | 1 |
| DTNB     | 0,05970651  | 6,018524567 | 0,975234903 | 1 |
| RUFY2    | 0,058682571 | 4,0732145   | 0,975808462 | 1 |
| VKORC1   | 0,045170239 | 8,119983401 | 0,975958015 | 1 |
| NUDT5    | 0,014115069 | 6,018784149 | 0,976216849 | 1 |
| RPUSD3   | 0,049266428 | 4,587639997 | 0,97636152  | 1 |
| GORASP2  | 0,036624499 | 5,866123555 | 0,976438905 | 1 |
| KIAA0226 | 0,04971256  | 7,094627696 | 0,976729276 | 1 |
| TRIM33   | 0,053841085 | 4,661219071 | 0,976932285 | 1 |
| NEDD4    | 0,05688735  | 5,34873877  | 0,977689477 | 1 |
| MLL3     | 0,062369841 | 6,114049424 | 0,977760294 | 1 |
| EPHB4    | 0,062521535 | 6,705221459 | 0,977902793 | 1 |
| SUOX     | 0,049155322 | 4,34577586  | 0,977979583 | 1 |
| RAE1     | 0,050658236 | 5,249136981 | 0,978700796 | 1 |
| FAM127B  | 0,018199694 | 7,453877832 | 0,978956332 | 1 |
| VSIG10   | 0,063063572 | 3,478760338 | 0,979565118 | 1 |
| GRAMD1A  | 0,043253877 | 6,302773339 | 0,979875033 | 1 |
| CTDSPL2  | 0,065394888 | 6,193185883 | 0,979896679 | 1 |
| FAM106A  | 0,111770105 | 5,653393782 | 0,980220977 | 1 |
| CALM3    | 0,016155501 | 8,672115191 | 0,980242673 | 1 |
| USP12    | 0,025074028 | 6,887656418 | 0,980426463 | 1 |
| PAPD4    | 0,081101436 | 5,054493883 | 0,980434541 | 1 |
| CARHSP1  | 0,023969745 | 6,3311519   | 0,980500435 | 1 |
| RPS11    | 0,014779066 | 11,78284243 | 0,980923195 | 1 |

|           |             |             |             |   |
|-----------|-------------|-------------|-------------|---|
| POLR2E    | 0,034380993 | 7,17436198  | 0,981036831 | 1 |
| OS9       | 0,043211589 | 6,847019412 | 0,981958062 | 1 |
| C6orf57   | 0,049100344 | 4,28759454  | 0,982042943 | 1 |
| H2AFV     | 0,015790138 | 7,965133032 | 0,982181006 | 1 |
| LANCL2    | 0,019548353 | 5,945288433 | 0,982426843 | 1 |
| TCTN1     | 0,052336101 | 5,143829454 | 0,982484961 | 1 |
| SNRNP40   | 0,042878952 | 5,496353697 | 0,982829894 | 1 |
| OAT       | 0,043749632 | 5,984370585 | 0,982859639 | 1 |
| AP3M1     | 0,025018222 | 6,515564758 | 0,983014788 | 1 |
| MRPL28    | 0,037378743 | 5,744657876 | 0,98304321  | 1 |
| DUSP5     | 0,086480605 | 5,55072239  | 0,983071535 | 1 |
| OSBPL3    | 0,035026307 | 5,963412109 | 0,983212726 | 1 |
| POLR2G    | 0,047679507 | 5,746384378 | 0,98336791  | 1 |
| GPS2      | 0,034936617 | 5,788800366 | 0,983570225 | 1 |
| PURB      | 0,047335573 | 6,106750064 | 0,983688617 | 1 |
| MAPK1     | 0,033889973 | 6,990553407 | 0,983829201 | 1 |
| NOMO2     | 0,049316021 | 5,077446079 | 0,984158374 | 1 |
| SETD1B    | 0,064185179 | 5,645630744 | 0,98498282  | 1 |
| KIF1B     | 0,037572606 | 5,893836163 | 0,985000185 | 1 |
| LAMC1     | 0,019788765 | 7,984291114 | 0,985460313 | 1 |
| DENND4B   | 0,058417752 | 5,359641833 | 0,985557507 | 1 |
| NRBP1     | 0,045540246 | 5,744301912 | 0,985615407 | 1 |
| SEC24C    | 0,038985816 | 6,108354527 | 0,98591996  | 1 |
| IQCE      | 0,052515407 | 4,13441077  | 0,986260266 | 1 |
| GLRX5     | 0,038558325 | 6,693398996 | 0,986264959 | 1 |
| COX5B     | 0,037535149 | 8,223391518 | 0,986816571 | 1 |
| AMPD3     | 0,053497491 | 4,749164362 | 0,986878704 | 1 |
| ZFYVE26   | 0,017448251 | 6,984048305 | 0,987546709 | 1 |
| RAB6A     | 0,02226214  | 8,48921028  | 0,987803894 | 1 |
| DPP7      | 0,054178622 | 6,009169017 | 0,9881438   | 1 |
| C5orf15   | 0,045197547 | 7,362240727 | 0,988294353 | 1 |
| FNBP4     | 0,034668296 | 5,721204103 | 0,988361609 | 1 |
| LONP2     | 0,038601133 | 7,141456984 | 0,98841859  | 1 |
| PARVB     | 0,04415719  | 4,787247973 | 0,988612062 | 1 |
| MRPL27    | 0,052932986 | 4,157198153 | 0,988973084 | 1 |
| CALM2     | 0,038775153 | 9,058281238 | 0,989446941 | 1 |
| LOC550112 | 0,0578621   | 4,098952642 | 0,989633472 | 1 |
| NLGN2     | 0,070833857 | 5,904046367 | 0,989786785 | 1 |
| TNRC6A    | 0,034112849 | 5,960131272 | 0,989850166 | 1 |
| SH3GLB2   | 0,056071021 | 6,220011332 | 0,99046942  | 1 |
| GLT25D1   | 0,05498776  | 7,267799927 | 0,990734479 | 1 |
| PPARA     | 0,046932605 | 3,929506769 | 0,990794489 | 1 |
| NOTCH3    | 0,119195216 | 7,972228473 | 0,990803567 | 1 |
| KLHDC2    | 0,035790463 | 7,192602889 | 0,990978577 | 1 |
| ROMO1     | 0,024577116 | 7,110658236 | 0,991810709 | 1 |
| EIF3F     | 0,03332385  | 8,60952462  | 0,992356218 | 1 |
| PIAS4     | 0,064896843 | 4,756165962 | 0,993238046 | 1 |
| FOXJ3     | 0,036287285 | 6,30879027  | 0,993245669 | 1 |
| CCDC71    | 0,046148468 | 4,582796665 | 0,993729404 | 1 |
| UHMK1     | 0,032560355 | 5,654724176 | 0,993929476 | 1 |

|          |             |             |             |   |
|----------|-------------|-------------|-------------|---|
| PHF10    | 0,024603305 | 7,402989526 | 0,994056934 | 1 |
| API5     | 0,026119115 | 6,169847166 | 0,994517513 | 1 |
| NOP10    | 0,029363306 | 8,258558813 | 0,994592239 | 1 |
| RPL13A   | 0,026170552 | 10,43866085 | 0,9947424   | 1 |
| SMAD2    | 0,022648155 | 7,197421484 | 0,994958126 | 1 |
| SDHC     | 0,022638572 | 7,645320808 | 0,994999374 | 1 |
| MT1E     | 0,102087756 | 6,47046732  | 0,995134266 | 1 |
| KEAP1    | 0,045513329 | 6,270182518 | 0,995238806 | 1 |
| FMNL2    | 0,033930972 | 6,921300679 | 0,996447825 | 1 |
| POLE4    | 0,047331466 | 5,09889603  | 0,996644159 | 1 |
| DRAP1    | 0,03475824  | 6,716285059 | 0,99686372  | 1 |
| TAP2     | 0,03392938  | 5,877618309 | 0,996904497 | 1 |
| EXOC7    | 0,032757537 | 5,983972478 | 0,997053701 | 1 |
| PNKP     | 0,041927024 | 6,531619179 | 0,997097869 | 1 |
| ZC3H13   | 0,023813474 | 6,465010494 | 0,997179638 | 1 |
| KLHL15   | 0,035625211 | 4,106150444 | 0,997683419 | 1 |
| PSMC3    | 0,027011216 | 7,717530465 | 0,997793388 | 1 |
| RPL3     | 0,036762069 | 10,51212427 | 0,99795368  | 1 |
| COG7     | 0,048402208 | 4,242197518 | 0,998258773 | 1 |
| ANKRD13C | 0,030204836 | 5,573080262 | 0,998273351 | 1 |
| AFF4     | 0,029220319 | 7,599014975 | 0,998777062 | 1 |
| CAV2     | 0,114518364 | 8,821663615 | 0,999001937 | 1 |
| KIAA0368 | 0,025687324 | 7,188123322 | 0,999193535 | 1 |
| ZNF415   | 0,07884605  | 4,156633743 | 0,999841874 | 1 |
| GXYLT2   | 0,06237945  | 5,332608159 | 1           | 1 |
| NMI      | 0,060322765 | 4,117506507 | 1           | 1 |
| PLEKHA7  | 0,058485147 | 4,435646298 | 1           | 1 |
| TXNDC12  | 0,057154065 | 5,287840033 | 1           | 1 |
| USP13    | 0,053846524 | 4,637216204 | 1           | 1 |
| ANTXR2   | 0,052352868 | 6,588661793 | 1           | 1 |
| TMEM161A | 0,051437043 | 4,781510492 | 1           | 1 |
| LYRM7    | 0,050448567 | 3,748209437 | 1           | 1 |
| MPP5     | 0,049210138 | 5,569835842 | 1           | 1 |
| TET1     | 0,047725823 | 4,020850116 | 1           | 1 |
| ADCY7    | 0,045763725 | 5,715231747 | 1           | 1 |
| RBM45    | 0,04181296  | 5,235016693 | 1           | 1 |
| RSAD1    | 0,041542329 | 4,913595443 | 1           | 1 |
| LETM1    | 0,041286238 | 4,906046116 | 1           | 1 |
| IQSEC1   | 0,04109918  | 3,298323148 | 1           | 1 |
| SEL1L    | 0,040432526 | 5,972404853 | 1           | 1 |
| SCAMP1   | 0,040387485 | 5,107270067 | 1           | 1 |
| C5orf44  | 0,039592621 | 4,878316494 | 1           | 1 |
| SVIP     | 0,039055226 | 4,251437961 | 1           | 1 |
| B9D1     | 0,03771462  | 4,508181521 | 1           | 1 |
| ZNF211   | 0,037415796 | 4,379584374 | 1           | 1 |
| OGFR     | 0,036719221 | 6,144860267 | 1           | 1 |
| FAM63B   | 0,036130931 | 4,559749903 | 1           | 1 |
| RXRB     | 0,035053941 | 5,269047191 | 1           | 1 |
| PANK2    | 0,034193598 | 4,89990529  | 1           | 1 |
| NXN      | 0,033940008 | 4,577160408 | 1           | 1 |



|           |             |             |   |   |
|-----------|-------------|-------------|---|---|
| FZR1      | 0,033466852 | 5,513157064 | 1 | 1 |
| PRKAR2A   | 0,033458766 | 4,69118053  | 1 | 1 |
| ABCD4     | 0,033137769 | 5,210222695 | 1 | 1 |
| DCTN3     | 0,032772249 | 5,28673496  | 1 | 1 |
| MRPL22    | 0,032398487 | 4,958540825 | 1 | 1 |
| GABPA     | 0,032040532 | 5,723739625 | 1 | 1 |
| COG3      | 0,031001358 | 4,175522821 | 1 | 1 |
| FAM53C    | 0,030468945 | 4,600870561 | 1 | 1 |
| IFIT5     | 0,029502572 | 5,412109776 | 1 | 1 |
| NAA35     | 0,029454757 | 5,205929069 | 1 | 1 |
| CNOT6     | 0,029213907 | 5,828917163 | 1 | 1 |
| UHRF1BP1L | 0,028631834 | 4,593663153 | 1 | 1 |
| C3orf17   | 0,028571469 | 4,88407757  | 1 | 1 |
| LOC283070 | 0,028048303 | 5,200343156 | 1 | 1 |
| COX15     | 0,027866776 | 4,770446076 | 1 | 1 |
| ID1I      | 0,027554874 | 5,549781794 | 1 | 1 |
| SH2D4A    | 0,026322988 | 5,574732255 | 1 | 1 |
| PIP5K1A   | 0,026273191 | 6,066553485 | 1 | 1 |
| SMAP1     | 0,025911238 | 5,394915786 | 1 | 1 |
| ZDHHC5    | 0,025516607 | 5,625399069 | 1 | 1 |
| HAUS4     | 0,024152372 | 3,931789079 | 1 | 1 |
| NIT2      | 0,024034838 | 5,245931656 | 1 | 1 |
| UBN1      | 0,023897377 | 5,190720124 | 1 | 1 |
| SHPK      | 0,023245557 | 5,016715114 | 1 | 1 |
| ZC3H3     | 0,023157583 | 5,063783566 | 1 | 1 |
| CNST      | 0,022492662 | 3,305204023 | 1 | 1 |
| SMYD2     | 0,021672104 | 4,807919682 | 1 | 1 |
| RBM7      | 0,021646476 | 4,915005956 | 1 | 1 |
| MLKL      | 0,020923141 | 5,25307844  | 1 | 1 |
| TMEM54    | 0,020295275 | 4,518287489 | 1 | 1 |
| TTC7B     | 0,019914548 | 4,742036087 | 1 | 1 |
| LATS1     | 0,019541052 | 5,673701095 | 1 | 1 |
| GOLGA2    | 0,019384078 | 4,137539731 | 1 | 1 |
| DYNC1LI2  | 0,019381737 | 5,634975355 | 1 | 1 |
| NDEL1     | 0,019326757 | 5,249890134 | 1 | 1 |
| TNFAIP8   | 0,019284521 | 4,822824697 | 1 | 1 |
| DYM       | 0,019139228 | 5,08755878  | 1 | 1 |
| HEXDC     | 0,01899415  | 4,825520278 | 1 | 1 |
| PIP5K2    | 0,018625736 | 4,642758691 | 1 | 1 |
| OTUD7B    | 0,017835216 | 4,539047    | 1 | 1 |
| ATG12     | 0,016405245 | 5,3368861   | 1 | 1 |
| C12orf65  | 0,01495513  | 5,078652906 | 1 | 1 |
| NPRL2     | 0,014656324 | 3,784608453 | 1 | 1 |
| SPATA2L   | 0,014536178 | 3,415016081 | 1 | 1 |
| ENOPH1    | 0,014426637 | 5,735166111 | 1 | 1 |
| DDHD1     | 0,014291862 | 5,227271347 | 1 | 1 |
| KPNA1     | 0,014026366 | 4,895915618 | 1 | 1 |
| KDM4C     | 0,013775266 | 5,206143321 | 1 | 1 |
| RAB43     | 0,013073464 | 5,718341454 | 1 | 1 |
| FAM118B   | 0,011787408 | 5,049498153 | 1 | 1 |

|          |              |             |   |   |
|----------|--------------|-------------|---|---|
| RCL1     | 0,011400698  | 5,232432386 | 1 | 1 |
| NOL8     | 0,011324952  | 4,561202583 | 1 | 1 |
| STK35    | 0,011004579  | 5,168272564 | 1 | 1 |
| TFIP11   | 0,010800821  | 4,356836012 | 1 | 1 |
| SH3GL1   | 0,009634479  | 5,445681291 | 1 | 1 |
| KLC1     | 0,008465468  | 4,189365145 | 1 | 1 |
| TRIM65   | 0,008130147  | 5,330631738 | 1 | 1 |
| HIRA     | 0,008015796  | 4,005051523 | 1 | 1 |
| TMEM170B | 0,007268605  | 3,841097778 | 1 | 1 |
| FZD8     | 0,007146301  | 5,604838615 | 1 | 1 |
| MORC4    | 0,007047941  | 5,128901332 | 1 | 1 |
| LYPLAL1  | 0,005975456  | 4,616808774 | 1 | 1 |
| METRNL   | 0,004825951  | 5,218312897 | 1 | 1 |
| C8orf40  | 0,004775431  | 5,659362781 | 1 | 1 |
| TBC1D3   | 0,003963042  | 5,356896767 | 1 | 1 |
| BRAF     | 0,003790601  | 5,739754216 | 1 | 1 |
| FRYL     | 0,003624917  | 4,28274642  | 1 | 1 |
| HDGFRP2  | 0,003495559  | 4,608582265 | 1 | 1 |
| ATP5S    | 0,003363292  | 3,735783429 | 1 | 1 |
| BAHCC1   | 0,003354196  | 4,785857477 | 1 | 1 |
| PRKACB   | 0,002811702  | 4,947738475 | 1 | 1 |
| CMC1     | 0,001845359  | 4,38023585  | 1 | 1 |
| NARS2    | -0,001362829 | 4,93115956  | 1 | 1 |
| ZFP161   | 0,001077971  | 4,832125534 | 1 | 1 |
| ZFAND3   | 0,000642689  | 5,483796493 | 1 | 1 |
| TMEM135  | 0,000252069  | 5,760829382 | 1 | 1 |

**Table S1\_B: edgeR results**

logFC, log fold change; logCPM, log counts per million; p value; FDR, Benjamini-Hochberg adjusted p value are reported for lung adenocarcinoma (LUAD) dataset

| Gene     | logFC        | logCPM      | PValue      | FDR         |
|----------|--------------|-------------|-------------|-------------|
| EMP2     | -2,889109475 | 9,840066224 | 4,82E-120   | 3,29E-116   |
| STX11    | -2,949125157 | 5,31838762  | 6,99E-112   | 2,38E-108   |
| EPAS1    | -2,883487185 | 10,17081942 | 1,61E-110   | 3,66E-107   |
| GRK5     | -2,788143567 | 5,714391585 | 2,78E-108   | 4,7412E-105 |
| PYCR1    | 3,674599452  | 7,260126978 | 8,36901E-91 | 1,14137E-87 |
| RASIP1   | -2,472733358 | 4,665649265 | 5,83471E-83 | 6,63114E-80 |
| AGER     | -5,516499851 | 9,760823179 | 3,004E-82   | 2,92633E-79 |
| PNPLA6   | -1,637210823 | 7,004886314 | 1,2691E-81  | 1,08175E-78 |
| GPR146   | -2,264980936 | 3,671769476 | 5,21814E-76 | 3,95361E-73 |
| ADRB2    | -3,254426128 | 4,40227713  | 6,16001E-73 | 4,20051E-70 |
| SMAD6    | -2,719953429 | 4,605312915 | 4,82083E-66 | 2,98848E-63 |
| HPS5     | -1,191666515 | 5,790890531 | 1,08436E-62 | 6,16188E-60 |
| SERINC1  | -1,188808924 | 8,462782739 | 1,0717E-60  | 5,62147E-58 |
| CAV2     | -2,495264887 | 7,939299768 | 4,64293E-59 | 2,26144E-56 |
| CSRNP1   | -2,287581271 | 6,996382734 | 3,5023E-57  | 1,59214E-54 |
| SNRK     | -1,253414637 | 6,071643022 | 8,61485E-57 | 3,67154E-54 |
| BMPR2    | -1,396118546 | 7,632763753 | 4,72012E-56 | 1,89332E-53 |
| ARHGAP31 | -2,117518979 | 6,572130819 | 6,05697E-56 | 2,29458E-53 |
| SPTBN1   | -1,94734219  | 9,655093893 | 9,36764E-56 | 3,362E-53   |
| AGTPBP1  | -1,408443787 | 5,030129707 | 1,12729E-55 | 3,84349E-53 |
| DOCK4    | -1,810732306 | 5,802470341 | 2,55295E-55 | 8,28978E-53 |
| TNS1     | -2,358721343 | 9,198578765 | 8,26435E-55 | 2,56157E-52 |
| CAT      | -1,866044272 | 7,83310222  | 1,22826E-54 | 3,64153E-52 |
| FEZ1     | -1,805823381 | 4,220431702 | 1,40779E-54 | 3,99989E-52 |
| SYNM     | -2,162440403 | 4,932690383 | 2,23709E-54 | 6,1019E-52  |
| TGFBR3   | -2,650951904 | 5,62776107  | 3,87274E-54 | 1,0157E-51  |
| NDST1    | -1,716770863 | 7,59025682  | 8,09715E-54 | 2,04498E-51 |
| THBD     | -2,43529632  | 6,882739718 | 9,58316E-54 | 2,33384E-51 |
| KIF1C    | -1,568682362 | 7,862258201 | 8,53282E-53 | 2,00639E-50 |
| TACC1    | -1,958783669 | 7,852074673 | 1,12358E-52 | 2,55389E-50 |
| HEG1     | -2,221980354 | 7,536018365 | 3,34847E-52 | 7,36556E-50 |
| MEF2A    | -0,991481477 | 6,454219286 | 3,58045E-52 | 7,62971E-50 |
| CD93     | -2,156466038 | 7,785677226 | 4,76034E-52 | 9,8366E-50  |
| RCAN1    | -1,814563435 | 6,28820322  | 8,39287E-52 | 1,68326E-49 |
| PPP1R15A | -1,882044104 | 7,50331745  | 1,30554E-51 | 2,54357E-49 |
| GNAQ     | -1,319797736 | 7,343737575 | 1,58452E-51 | 3,00134E-49 |
| N4BP1    | -1,12786104  | 6,793456077 | 1,95306E-51 | 3,59944E-49 |
| TOP2A    | 4,013202065  | 7,279193709 | 2,20151E-51 | 3,95055E-49 |
| ADARB1   | -1,978617962 | 5,463985355 | 4,33781E-51 | 7,5845E-49  |
| TMEM204  | -1,8073939   | 4,81840444  | 6,10578E-51 | 1,04088E-48 |
| KANK2    | -1,637003626 | 7,417314654 | 1,12665E-49 | 1,87381E-47 |
| C10orf54 | -1,562239548 | 6,618679385 | 1,15452E-49 | 1,87445E-47 |
| ALDH18A1 | 1,562731107  | 7,0408601   | 1,23972E-49 | 1,96596E-47 |
| UBE2T    | 3,428222731  | 4,615489352 | 3,13531E-49 | 4,85902E-47 |
| PLK1     | 3,570614258  | 4,991654691 | 5,75397E-49 | 8,71918E-47 |

|           |              |             |             |             |
|-----------|--------------|-------------|-------------|-------------|
| ZFP106    | -1,491718549 | 7,012625408 | 1,27596E-48 | 1,89147E-46 |
| PTRF      | -2,03086736  | 8,841421142 | 5,97089E-48 | 8,66287E-46 |
| KIAA1462  | -2,129559268 | 6,790992121 | 7,40553E-48 | 1,05205E-45 |
| PPP1R14B  | 2,09152231   | 7,445777784 | 4,53124E-47 | 6,30583E-45 |
| TBX2      | -2,086076603 | 5,648277162 | 6,71105E-47 | 9,08657E-45 |
| PAICS     | 1,771413065  | 7,374248082 | 6,79594E-47 | 9,08657E-45 |
| CTHRC1    | 4,213672956  | 6,448063268 | 1,42402E-46 | 1,86739E-44 |
| UHRF1     | 3,43299177   | 5,082710687 | 1,78479E-46 | 2,29632E-44 |
| TOM1L2    | -1,644475712 | 6,291992257 | 2,17184E-46 | 2,74255E-44 |
| RCC1      | 1,777058335  | 5,320434975 | 2,28102E-46 | 2,82805E-44 |
| SLC39A8   | -2,401900512 | 8,5705656   | 3,1888E-46  | 3,88294E-44 |
| ZWINT     | 2,640241076  | 5,192861351 | 4,07678E-46 | 4,87711E-44 |
| MTMR10    | -1,203643492 | 5,570006488 | 7,21409E-46 | 8,40513E-44 |
| MDK       | 3,370294378  | 8,660452873 | 7,27237E-46 | 8,40513E-44 |
| DLGAP5    | 3,80616867   | 4,357566156 | 7,92312E-46 | 9,00462E-44 |
| GIMAP6    | -1,95933531  | 5,841720116 | 1,17788E-45 | 1,31672E-43 |
| GOLM1     | 2,471542641  | 8,42765101  | 1,21582E-45 | 1,33721E-43 |
| AHNAK     | -2,379898874 | 10,65230405 | 1,23838E-45 | 1,3404E-43  |
| C20orf194 | -1,52931068  | 5,219476796 | 1,73874E-45 | 1,85257E-43 |
| GAB1      | -1,552812015 | 5,453874501 | 2,02042E-45 | 2,11958E-43 |
| CCNB1     | 3,264165109  | 5,815091473 | 2,95486E-45 | 3,05291E-43 |
| SRPK1     | 1,522575962  | 6,811839799 | 3,11747E-45 | 3,17284E-43 |
| QKI       | -1,322431552 | 7,53689221  | 4,15578E-45 | 4,1674E-43  |
| MYADM     | -1,939501855 | 8,381225519 | 4,61766E-45 | 4,56345E-43 |
| ATIC      | 1,214449798  | 6,93534445  | 6,32031E-45 | 6,15688E-43 |
| SPARCL1   | -2,032053296 | 8,566447123 | 6,6191E-45  | 6,35714E-43 |
| SNX1      | -0,987301061 | 7,466520078 | 1,11661E-44 | 1,05752E-42 |
| NUSAP1    | 2,730852908  | 5,27362149  | 8,76306E-44 | 8,18566E-42 |
| RRM2      | 3,101785762  | 6,187822325 | 5,41789E-43 | 4,99251E-41 |
| KLF13     | -1,582417847 | 7,445201354 | 8,20799E-43 | 7,4627E-41  |
| KLF6      | -1,732638942 | 8,552767976 | 6,60548E-42 | 5,92668E-40 |
| LTBP4     | -2,197193816 | 7,879459014 | 6,93146E-42 | 6,1384E-40  |
| FLI1      | -1,63285531  | 5,443582209 | 8,17609E-42 | 7,14779E-40 |
| CFD       | -2,394238226 | 5,898594749 | 8,829E-42   | 7,62088E-40 |
| CALCOCO1  | -1,429973558 | 6,973490181 | 1,77386E-41 | 1,51199E-39 |
| TK1       | 2,899350392  | 6,253146507 | 2,09539E-41 | 1,76401E-39 |
| GYPC      | -1,559548299 | 5,341678145 | 6,08591E-41 | 5,06095E-39 |
| LMCD1     | -1,572154308 | 5,804510246 | 7,00753E-41 | 5,75715E-39 |
| GINS2     | 3,094016376  | 3,930054591 | 1,12111E-40 | 8,99749E-39 |
| SSFA2     | -1,34880141  | 7,667587226 | 1,12155E-40 | 8,99749E-39 |
| MMP11     | 5,814943216  | 7,176201911 | 1,72329E-40 | 1,36641E-38 |
| C16orf88  | 1,234334884  | 4,563180284 | 3,09772E-40 | 2,42797E-38 |
| MYBL2     | 4,414449899  | 5,976285934 | 3,78137E-40 | 2,93013E-38 |
| ADAMTS1   | -2,439599521 | 6,661666453 | 8,61859E-40 | 6,60339E-38 |
| MYL9      | -1,625060287 | 8,397525957 | 2,72466E-39 | 2,06438E-37 |
| SLC2A1    | 3,732635286  | 7,795927749 | 2,76029E-39 | 2,0684E-37  |
| GAS6      | -1,776246308 | 7,740690196 | 6,50605E-39 | 4,82226E-37 |
| TTK       | 3,457714705  | 3,805405721 | 6,96029E-39 | 5,10346E-37 |
| FAM82A2   | -0,962538824 | 6,379124496 | 1,26835E-38 | 9,20094E-37 |
| ASPM      | 3,490965922  | 4,47167373  | 1,94928E-38 | 1,39918E-36 |

|          |              |             |             |             |
|----------|--------------|-------------|-------------|-------------|
| HBB      | -3,676679294 | 8,386776209 | 2,03084E-38 | 1,44253E-36 |
| CCNB2    | 3,585355242  | 4,801374501 | 2,08056E-38 | 1,46261E-36 |
| CCNA2    | 3,116027273  | 4,800973451 | 2,37568E-38 | 1,65304E-36 |
| AFAP1L1  | -1,649298102 | 4,678349946 | 2,45406E-38 | 1,69033E-36 |
| VAMP2    | -1,269068585 | 6,811845654 | 5,0193E-38  | 3,42266E-36 |
| UBE2C    | 4,346058078  | 5,657152524 | 5,37721E-38 | 3,63041E-36 |
| CDCA5    | 3,071829412  | 4,760892919 | 5,55276E-38 | 3,69101E-36 |
| VWF      | -2,307291628 | 8,971279742 | 5,57521E-38 | 3,69101E-36 |
| LATS2    | -1,22037291  | 5,600529817 | 1,2654E-37  | 8,29686E-36 |
| TRAP1    | 1,077162661  | 6,780314333 | 1,55985E-37 | 1,01301E-35 |
| PDK4     | -2,620900101 | 7,001380803 | 1,60938E-37 | 1,03532E-35 |
| CCT3     | 1,346404808  | 8,689696095 | 1,73791E-37 | 1,10755E-35 |
| INPP5K   | -1,104414572 | 6,12260369  | 3,01951E-37 | 1,90649E-35 |
| ZFYVE9   | -1,463794567 | 5,192470627 | 3,86613E-37 | 2,41864E-35 |
| SPAG5    | 3,04412519   | 5,231392349 | 7,37893E-37 | 4,57427E-35 |
| LDLR     | -2,142959171 | 8,092702356 | 9,22862E-37 | 5,66937E-35 |
| SIGLEC11 | -1,748460605 | 2,144648368 | 3,66206E-36 | 2,22961E-34 |
| FXVD6    | -1,686280707 | 5,941126487 | 4,26786E-36 | 2,57545E-34 |
| RBMS2    | -1,283581457 | 7,157809651 | 6,86924E-36 | 4,10889E-34 |
| LMO7     | -1,726187772 | 8,912881035 | 8,62205E-36 | 5,1125E-34  |
| UTRN     | -1,709013375 | 7,695827452 | 1,09516E-35 | 6,43785E-34 |
| CRABP2   | 6,002566857  | 8,247507427 | 1,28667E-35 | 7,49899E-34 |
| PAPSS1   | -0,979787668 | 6,750406743 | 4,42696E-35 | 2,55826E-33 |
| DLC1     | -2,377576451 | 7,622753992 | 5,52079E-35 | 3,16355E-33 |
| C2orf29  | 1,062855106  | 6,618577038 | 5,8224E-35  | 3,30858E-33 |
| WDR12    | 1,31937237   | 4,878768038 | 5,90559E-35 | 3,32812E-33 |
| HYAL2    | -1,150792161 | 7,286701625 | 7,04618E-35 | 3,93835E-33 |
| PTTG1    | 2,45522468   | 4,929526062 | 8,3556E-35  | 4,63226E-33 |
| AMOTL1   | -1,794437199 | 6,526308577 | 9,02875E-35 | 4,96509E-33 |
| ITM2A    | -1,885578726 | 5,544653589 | 1,48634E-34 | 8,10827E-33 |
| OCIAD2   | 2,378132698  | 7,33913173  | 1,76273E-34 | 9,53973E-33 |
| PDIA4    | 1,685177376  | 9,135020861 | 1,8301E-34  | 9,82633E-33 |
| ARAP3    | -1,43013308  | 5,06611238  | 3,95364E-34 | 2,10624E-32 |
| PTPN1    | -1,119863147 | 7,19573977  | 4,33029E-34 | 2,28901E-32 |
| KPNA2    | 2,059888147  | 7,145273061 | 6,754E-34   | 3,54273E-32 |
| CDK1     | 2,665305927  | 5,554782371 | 9,43784E-34 | 4,91272E-32 |
| CSTF2    | 1,047429486  | 4,742248334 | 1,19941E-33 | 6,19607E-32 |
| ENG      | -1,493473282 | 8,182535129 | 1,30387E-33 | 6,68503E-32 |
| BUB1     | 2,781832148  | 4,901433644 | 1,98344E-33 | 1,00934E-31 |
| ZEB1     | -1,465035081 | 5,39852205  | 2,90232E-33 | 1,46599E-31 |
| FERMT2   | -1,387781017 | 6,49955167  | 5,76591E-33 | 2,89101E-31 |
| CALM1    | -0,820595651 | 9,150389107 | 1,0234E-32  | 5,09384E-31 |
| ARAP1    | -0,955699027 | 7,662854634 | 1,17019E-32 | 5,78224E-31 |
| LRRFIP1  | -1,05461387  | 7,997396823 | 1,44509E-32 | 7,08926E-31 |
| C1orf112 | 1,419326369  | 3,900695941 | 1,50658E-32 | 7,33811E-31 |
| RECK     | -1,4946187   | 4,463149073 | 1,92456E-32 | 9,30751E-31 |
| LIMD1    | -1,43280197  | 6,825633627 | 2,35936E-32 | 1,13299E-30 |
| MCM4     | 2,126039834  | 6,430721964 | 2,56771E-32 | 1,22442E-30 |
| INPP5A   | -1,004273081 | 5,289993835 | 2,6532E-32  | 1,2564E-30  |
| GGA2     | -1,031188707 | 7,503744237 | 2,7461E-32  | 1,29142E-30 |

|           |              |             |             |             |
|-----------|--------------|-------------|-------------|-------------|
| PTPLAD2   | -1,477422287 | 5,300828446 | 3,60145E-32 | 1,68207E-30 |
| ADD1      | -0,787937494 | 8,301650724 | 4,59208E-32 | 2,13016E-30 |
| MRPL3     | 1,115636091  | 6,992020059 | 6,83121E-32 | 3,14744E-30 |
| HELLS     | 2,377637464  | 3,098722288 | 6,978E-32   | 3,19349E-30 |
| PLSCR4    | -1,41688624  | 5,479578486 | 1,12905E-31 | 5,13268E-30 |
| MEIS1     | -1,39312929  | 4,382340251 | 1,38981E-31 | 6,27625E-30 |
| KIAA0101  | 2,291370377  | 4,551266618 | 1,60694E-31 | 7,20903E-30 |
| MANF      | 1,320690928  | 6,710959088 | 1,68601E-31 | 7,51433E-30 |
| BNIP2     | -0,818788877 | 5,881278537 | 2,12988E-31 | 9,43093E-30 |
| CRIM1     | -1,532940344 | 7,219770349 | 2,75785E-31 | 1,21328E-29 |
| PCYOX1    | -1,17712017  | 7,913508348 | 2,78249E-31 | 1,21627E-29 |
| TYMS      | 2,133146764  | 5,226405221 | 3,1408E-31  | 1,36415E-29 |
| SPP1      | 5,379465066  | 9,933791872 | 3,84712E-31 | 1,66035E-29 |
| STK39     | 1,538388681  | 6,328401311 | 6,27369E-31 | 2,69059E-29 |
| HN1       | 1,806987273  | 7,679709277 | 6,45376E-31 | 2,75051E-29 |
| ETF1      | -0,744386548 | 7,605463544 | 8,04024E-31 | 3,40537E-29 |
| DOK2      | -1,75256918  | 5,185336523 | 9,00372E-31 | 3,7899E-29  |
| MARCKSL1  | 2,039048371  | 7,930076842 | 1,02388E-30 | 4,28333E-29 |
| SHROOM4   | -1,965587338 | 5,704856655 | 1,10813E-30 | 4,60753E-29 |
| MSTO1     | 1,222621456  | 5,616861837 | 1,43858E-30 | 5,94527E-29 |
| CD52      | -2,028801756 | 6,858946084 | 1,61205E-30 | 6,62202E-29 |
| PTPRM     | -1,653140489 | 6,547502898 | 2,43071E-30 | 9,88812E-29 |
| MAP3K3    | -1,091323735 | 6,02211836  | 2,43614E-30 | 9,88812E-29 |
| MCM6      | 1,524157189  | 6,143385646 | 2,47263E-30 | 9,97684E-29 |
| B4GALT2   | 1,219317644  | 6,210170578 | 2,7444E-30  | 1,09689E-28 |
| CD83      | -1,640145627 | 5,762956223 | 2,75066E-30 | 1,09689E-28 |
| HIST1H2BD | 2,472757545  | 4,575926846 | 3,7234E-30  | 1,47615E-28 |
| ANKS1A    | -1,244410065 | 6,536940396 | 5,01066E-30 | 1,97501E-28 |
| MYO19     | 1,311777533  | 5,680316599 | 5,93128E-30 | 2,32445E-28 |
| ARHGEF6   | -1,368641331 | 5,660303726 | 6,98891E-30 | 2,72328E-28 |
| SERPING1  | -1,381545244 | 9,168837972 | 1,13762E-29 | 4,40765E-28 |
| ALOX5     | -1,766379072 | 6,772067667 | 1,21564E-29 | 4,68331E-28 |
| HMGA1     | 2,399789254  | 8,451863366 | 1,25247E-29 | 4,7981E-28  |
| DKC1      | 1,100885076  | 6,5924674   | 1,28269E-29 | 4,88641E-28 |
| ZEB2      | -1,464364789 | 6,250616586 | 1,31632E-29 | 4,98665E-28 |
| C1orf198  | -1,315413958 | 7,644814266 | 1,36917E-29 | 5,15821E-28 |
| PION      | -1,358248066 | 5,628825413 | 1,48949E-29 | 5,58067E-28 |
| HMGB3     | 3,138901456  | 8,297550221 | 1,63528E-29 | 6,09342E-28 |
| NPM3      | 1,935847794  | 5,025795255 | 2,60601E-29 | 9,65782E-28 |
| EIF2AK1   | 0,912746718  | 8,271574924 | 2,70747E-29 | 9,9796E-28  |
| GALNT7    | 1,64216387   | 6,659222824 | 2,81072E-29 | 1,03044E-27 |
| CYBRD1    | -1,794204296 | 8,26730543  | 2,93412E-29 | 1,06993E-27 |
| APBB2     | -1,2164039   | 6,005002702 | 3,37854E-29 | 1,22544E-27 |
| FAM63B    | -1,089086553 | 4,19671463  | 3,60895E-29 | 1,30209E-27 |
| A2M       | -1,849778583 | 11,25207895 | 4,21116E-29 | 1,51136E-27 |
| NEXN      | -1,642949929 | 4,646030646 | 4,5245E-29  | 1,61532E-27 |
| FRMD4A    | -1,331507949 | 5,128307784 | 6,30494E-29 | 2,23924E-27 |
| NARF      | 1,150848791  | 6,371398742 | 6,52228E-29 | 2,30443E-27 |
| BZW2      | 1,37377949   | 6,998193011 | 6,56654E-29 | 2,30668E-27 |
| ACP5      | -1,647199172 | 7,93440045  | 6,59631E-29 | 2,30668E-27 |

|           |              |             |             |             |
|-----------|--------------|-------------|-------------|-------------|
| GAPDH     | 1,833372402  | 11,73532141 | 1,096E-28   | 3,81307E-27 |
| SLC25A25  | -1,535914022 | 5,771625653 | 1,12794E-28 | 3,90426E-27 |
| TRAF4     | 1,284994415  | 7,044046414 | 1,36044E-28 | 4,68527E-27 |
| FEN1      | 1,551036543  | 5,375222592 | 1,43979E-28 | 4,93362E-27 |
| GORASP2   | 0,857128577  | 7,698112315 | 1,63344E-28 | 5,5692E-27  |
| SORBS3    | -1,130280006 | 6,92801601  | 1,73438E-28 | 5,88394E-27 |
| RASL12    | -1,508985345 | 4,611896317 | 2,00186E-28 | 6,75776E-27 |
| SFXN4     | 1,412123643  | 5,032877002 | 2,75706E-28 | 9,26126E-27 |
| FLAD1     | 1,339402602  | 6,106222569 | 2,98042E-28 | 9,96251E-27 |
| ARHGEF10  | -1,384524894 | 5,55425216  | 3,2939E-28  | 1,09566E-26 |
| TNFRSF21  | 1,877426982  | 7,901068674 | 3,8273E-28  | 1,26691E-26 |
| RPP40     | 1,655427553  | 3,015670006 | 5,43668E-28 | 1,79095E-26 |
| PIK3R1    | -1,228144843 | 6,414969224 | 5,73304E-28 | 1,8795E-26  |
| SLC25A39  | 1,319715614  | 7,830955452 | 5,8291E-28  | 1,90185E-26 |
| KLF4      | -2,18445908  | 6,372909785 | 6,79278E-28 | 2,20571E-26 |
| RDX       | -1,058109102 | 7,457560669 | 6,83893E-28 | 2,20887E-26 |
| P4HB      | 1,104568559  | 10,806187   | 6,86728E-28 | 2,20887E-26 |
| OR2A9P    | -1,252523565 | 3,917993994 | 1,06817E-27 | 3,41963E-26 |
| ZBTB4     | -1,13921034  | 7,449270788 | 1,13428E-27 | 3,61433E-26 |
| DPH2      | 0,842837822  | 5,044261301 | 1,1776E-27  | 3,73491E-26 |
| DNA2      | 1,913425264  | 3,14544201  | 1,27263E-27 | 4,01763E-26 |
| FAP       | 2,724507599  | 5,315169342 | 1,37624E-27 | 4,3247E-26  |
| HSPD1     | 1,210209521  | 8,913170377 | 1,53066E-27 | 4,78787E-26 |
| FLCN      | -0,819662191 | 5,620994365 | 1,75959E-27 | 5,47884E-26 |
| SHMT2     | 1,703793     | 7,188582821 | 2,31747E-27 | 7,18312E-26 |
| TFB2M     | 1,207790019  | 5,026046213 | 2,81304E-27 | 8,67968E-26 |
| KCTD10    | -0,719518482 | 6,862120237 | 2,98892E-27 | 9,18083E-26 |
| SRD5A1    | 1,802568858  | 4,612669053 | 3,00633E-27 | 9,19289E-26 |
| FBXO7     | -0,638002019 | 7,108886759 | 3,14731E-27 | 9,58102E-26 |
| TIMP1     | 1,834833973  | 9,358449808 | 3,44976E-27 | 1,04551E-25 |
| JUND      | -1,49072498  | 7,941076509 | 3,81289E-27 | 1,15045E-25 |
| FAM136A   | 1,072444509  | 5,888107275 | 5,41619E-27 | 1,627E-25   |
| PAK1      | 1,183225952  | 6,790162403 | 5,58193E-27 | 1,66944E-25 |
| TJP1      | -1,084068988 | 7,546784956 | 5,9756E-27  | 1,77937E-25 |
| TIMP3     | -1,865318445 | 10,12235826 | 6,3387E-27  | 1,87929E-25 |
| ILF2      | 1,173137814  | 8,291506517 | 6,4667E-27  | 1,90894E-25 |
| C10orf116 | -2,59587748  | 6,518414345 | 6,98342E-27 | 2,05258E-25 |
| DCAF13    | 1,308635185  | 6,133346066 | 1,02427E-26 | 2,99763E-25 |
| SDCBP     | -0,893115025 | 8,540845492 | 1,42892E-26 | 4,16401E-25 |
| TNS3      | -1,200274222 | 8,052084179 | 1,50095E-26 | 4,35531E-25 |
| LDHA      | 1,463514604  | 10,24663065 | 1,54136E-26 | 4,45363E-25 |
| FBXO32    | 2,652888252  | 5,247555667 | 2,10391E-26 | 6,05339E-25 |
| HSD17B4   | -1,059212564 | 7,607249685 | 2,28067E-26 | 6,53442E-25 |
| RPGR      | -1,347367129 | 3,983036924 | 2,40265E-26 | 6,8551E-25  |
| ULK2      | -1,069464521 | 5,29923448  | 2,44527E-26 | 6,94762E-25 |
| GADD45B   | -1,749455917 | 6,979258573 | 2,73569E-26 | 7,74053E-25 |
| CHPF2     | 0,938766143  | 6,913112577 | 3,09467E-26 | 8,72007E-25 |
| RUSC1     | 1,11528083   | 6,059955393 | 3,45708E-26 | 9,70116E-25 |
| PROS1     | -1,492980419 | 6,677926856 | 3,87561E-26 | 1,08311E-24 |
| POC1A     | 1,683290734  | 3,648481492 | 4,15861E-26 | 1,15745E-24 |

|          |              |             |             |             |
|----------|--------------|-------------|-------------|-------------|
| MYH10    | -1,666216244 | 7,657085894 | 4,76279E-26 | 1,32022E-24 |
| DAB2IP   | -1,235084954 | 6,574095138 | 4,9383E-26  | 1,36333E-24 |
| SNRPE    | 1,178969132  | 6,424474982 | 5,46298E-26 | 1,5021E-24  |
| FANCG    | 1,257469532  | 4,399054741 | 5,57951E-26 | 1,52798E-24 |
| CCT5     | 1,262928247  | 8,460878236 | 6,23632E-26 | 1,70102E-24 |
| CFL2     | -1,324929028 | 5,858614976 | 6,42096E-26 | 1,7444E-24  |
| ENO1     | 1,210290012  | 11,2433854  | 7,15965E-26 | 1,93737E-24 |
| SLC44A2  | -1,007251762 | 8,361581125 | 7,6628E-26  | 2,06532E-24 |
| FABP5    | -1,842866812 | 6,92428628  | 9,16932E-26 | 2,46164E-24 |
| MRAS     | -1,116460889 | 5,242131008 | 1,01903E-25 | 2,725E-24   |
| EPB41L2  | -1,397484483 | 6,401383258 | 1,04687E-25 | 2,78851E-24 |
| TBC1D4   | -1,205300189 | 5,407334974 | 1,13756E-25 | 3,01831E-24 |
| KAT2B    | -1,234678492 | 5,364721484 | 1,15925E-25 | 3,06392E-24 |
| PDK1     | 1,683264957  | 5,247464455 | 1,75498E-25 | 4,62055E-24 |
| PTGER4   | -1,494918468 | 4,874423181 | 1,78305E-25 | 4,66628E-24 |
| FHL2     | 2,489672849  | 6,450483624 | 1,78604E-25 | 4,66628E-24 |
| INSIG1   | -1,212546573 | 6,460634183 | 1,97675E-25 | 5,14482E-24 |
| ERO1L    | 2,295588835  | 7,654601301 | 2,23885E-25 | 5,80483E-24 |
| B4GALT3  | 1,049960407  | 6,438636183 | 2,59697E-25 | 6,70786E-24 |
| PLEKHM3  | -1,095800308 | 5,069444946 | 2,62758E-25 | 6,76131E-24 |
| SACMIL   | -0,836058804 | 6,289391795 | 2,92451E-25 | 7,49708E-24 |
| BOP1     | 1,592243256  | 5,157719712 | 2,93602E-25 | 7,49839E-24 |
| INTS8    | 0,971524299  | 5,722792753 | 2,97477E-25 | 7,56902E-24 |
| FKBP11   | 1,807117105  | 6,097118024 | 3,28588E-25 | 8,32952E-24 |
| IRAK1    | 1,162817815  | 7,69809149  | 3,58129E-25 | 9,04475E-24 |
| CARD8    | -0,910638912 | 5,529205507 | 3,89715E-25 | 9,80615E-24 |
| GART     | 0,904636859  | 6,524497085 | 3,93234E-25 | 9,85832E-24 |
| UBL3     | -1,117177177 | 7,147585873 | 4,03068E-25 | 1,00678E-23 |
| LMNB1    | 1,896796349  | 5,785989764 | 4,90606E-25 | 1,22096E-23 |
| LAMB2    | -1,156755749 | 8,120667045 | 5,29142E-25 | 1,31208E-23 |
| ELMO1    | -1,224769468 | 5,19429332  | 7,34174E-25 | 1,81389E-23 |
| NLN      | 1,252832308  | 4,894591768 | 7,99373E-25 | 1,96784E-23 |
| SSH2     | -1,07161787  | 5,822023509 | 9,11472E-25 | 2,23573E-23 |
| XPR1     | 1,663146311  | 7,55994515  | 9,70454E-25 | 2,37187E-23 |
| ANO6     | -0,921525049 | 7,242292544 | 1,12076E-24 | 2,72945E-23 |
| ZNF438   | -0,726135931 | 4,125441474 | 1,24877E-24 | 3,03038E-23 |
| SERPINH1 | 1,315582901  | 8,535317022 | 1,27656E-24 | 3,08684E-23 |
| CTNNA1   | -1,227914012 | 6,187142233 | 1,31569E-24 | 3,1702E-23  |
| FLJ10038 | -0,996961792 | 3,730822203 | 1,39581E-24 | 3,35141E-23 |
| C11orf24 | 1,024575994  | 5,969156384 | 1,59426E-24 | 3,81449E-23 |
| COL3A1   | 2,734312106  | 11,30438098 | 1,68479E-24 | 4,01698E-23 |
| BRI3BP   | 1,496637279  | 3,085399961 | 1,71151E-24 | 4,06647E-23 |
| PAFAH1B1 | -0,719454022 | 7,610363582 | 1,96731E-24 | 4,65801E-23 |
| RAB14    | -0,659395707 | 7,738419053 | 2,34596E-24 | 5,53532E-23 |
| NME4     | 1,495225099  | 6,790057078 | 2,45107E-24 | 5,7634E-23  |
| VARS     | 1,16081905   | 7,283306755 | 2,56946E-24 | 6,02101E-23 |
| TTC28    | -1,40924216  | 5,488564092 | 2,84924E-24 | 6,65376E-23 |
| CYP51A1  | -1,055716278 | 7,378767207 | 3,00349E-24 | 6,99002E-23 |
| MYO1B    | -1,041358947 | 8,084710269 | 3,04897E-24 | 7,07174E-23 |
| DARS2    | 1,208845837  | 5,465189002 | 3,074E-24   | 7,10564E-23 |



|           |              |             |             |             |
|-----------|--------------|-------------|-------------|-------------|
| KNTC1     | 1,716089666  | 4,773907694 | 3,3954E-24  | 7,82203E-23 |
| RNASEH2A  | 1,461764401  | 4,876225837 | 3,4829E-24  | 7,99659E-23 |
| IQSEC1    | -1,01897981  | 6,721414933 | 3,90076E-24 | 8,92593E-23 |
| KCTD12    | -1,335862388 | 7,912009434 | 4,03994E-24 | 9,21349E-23 |
| NEDD9     | -1,624524957 | 8,182286065 | 4,32542E-24 | 9,83169E-23 |
| RAPGEF2   | -1,052459982 | 6,048516411 | 4,69174E-24 | 1,06289E-22 |
| C5orf34   | 1,854431383  | 2,115360274 | 4,9002E-24  | 1,10644E-22 |
| MACF1     | -1,376722661 | 8,78325002  | 5,1677E-24  | 1,16299E-22 |
| SLC15A3   | -1,372700108 | 6,404083109 | 5,76287E-24 | 1,29267E-22 |
| MRC1      | -2,146682782 | 8,029427893 | 6,08094E-24 | 1,35954E-22 |
| PRDX4     | 1,641485015  | 7,524492782 | 6,11067E-24 | 1,36172E-22 |
| FANCI     | 1,453735093  | 5,465946105 | 6,44126E-24 | 1,43072E-22 |
| COL1A1    | 3,015883015  | 11,66685044 | 7,92118E-24 | 1,75372E-22 |
| ZFP36     | -1,819736262 | 8,844889303 | 8,37577E-24 | 1,84836E-22 |
| CYTH1     | -0,900167739 | 6,672862076 | 9,51064E-24 | 2,08911E-22 |
| POLR2D    | 0,952602891  | 5,580838238 | 9,52798E-24 | 2,08911E-22 |
| TARS2     | 0,95123392   | 5,449180579 | 9,61614E-24 | 2,10168E-22 |
| FAM86A    | 0,817271245  | 4,285331614 | 1,01622E-23 | 2,21394E-22 |
| RAB11FIP2 | -0,9202306   | 5,000036375 | 1,03781E-23 | 2,25376E-22 |
| EPB41L5   | -1,259955883 | 6,08568888  | 1,05323E-23 | 2,27998E-22 |
| STEAP1    | 3,015658373  | 5,085500957 | 1,07637E-23 | 2,32271E-22 |
| VPS72     | 1,012958917  | 6,314431701 | 1,24662E-23 | 2,6816E-22  |
| RC3H1     | -0,744870961 | 5,609982074 | 1,29402E-23 | 2,77483E-22 |
| PPFIBP1   | -1,223479651 | 6,448244708 | 1,53669E-23 | 3,28486E-22 |
| STIP1     | 0,820620156  | 7,880100694 | 1,61932E-23 | 3,45067E-22 |
| CKS1B     | 2,036833694  | 6,551287014 | 1,66041E-23 | 3,5272E-22  |
| ZNF25     | -0,882931869 | 4,104038246 | 1,69194E-23 | 3,58301E-22 |
| GGCT      | 1,483957639  | 6,281326244 | 1,71777E-23 | 3,62645E-22 |
| UCHL5     | 0,856936123  | 5,359775051 | 1,74266E-23 | 3,66765E-22 |
| FIGNL1    | 1,386719583  | 4,295621043 | 1,83289E-23 | 3,84568E-22 |
| DENND5A   | -0,855229467 | 6,707974206 | 1,86763E-23 | 3,90655E-22 |
| SPTAN1    | -1,076190912 | 8,728395802 | 2,27579E-23 | 4,74575E-22 |
| HN1L      | 0,958738854  | 7,708260588 | 2,59227E-23 | 5,38922E-22 |
| TCP11L2   | -1,142537842 | 3,978818487 | 2,86935E-23 | 5,94714E-22 |
| EXOSC5    | 1,424337236  | 4,833519926 | 2,95891E-23 | 6,11419E-22 |
| ABTB1     | -0,924648318 | 5,38060792  | 3,43397E-23 | 7,0744E-22  |
| TPI1      | 1,295014802  | 9,76031217  | 3,47888E-23 | 7,14532E-22 |
| CCDC69    | -1,45314896  | 6,611286863 | 3,51208E-23 | 7,19185E-22 |
| DTL       | 1,980574345  | 4,285765089 | 3,59526E-23 | 7,34014E-22 |
| RACGAP1   | 1,701918862  | 5,664946364 | 3,90263E-23 | 7,94388E-22 |
| N4BP2L1   | -1,253583469 | 4,527943274 | 3,94569E-23 | 8,00763E-22 |
| MYO7A     | 1,771821022  | 4,164567778 | 3,99451E-23 | 8,08266E-22 |
| FAM13B    | -1,003606004 | 5,342095636 | 4,90651E-23 | 9,89866E-22 |
| PIAS1     | -0,745451993 | 4,935206119 | 4,93739E-23 | 9,93159E-22 |
| RALGPS2   | 1,199096274  | 5,024956147 | 6,09217E-23 | 1,22184E-21 |
| NOL11     | 0,725854373  | 6,093882809 | 6,54805E-23 | 1,30942E-21 |
| POLR2H    | 1,174466765  | 5,95637438  | 6,71664E-23 | 1,3392E-21  |
| SAP30L    | -0,862363527 | 5,621203819 | 8,80686E-23 | 1,75084E-21 |
| PCNA      | 1,192751316  | 6,895653448 | 8,85696E-23 | 1,75569E-21 |
| EHD2      | -1,335169462 | 8,082075572 | 9,12863E-23 | 1,80429E-21 |

|           |              |             |             |             |
|-----------|--------------|-------------|-------------|-------------|
| DDOST     | 0,87111687   | 8,851342395 | 9,18556E-23 | 1,8103E-21  |
| SNAP47    | 0,667437234  | 5,548904253 | 1,03621E-22 | 2,03629E-21 |
| WDR19     | -0,995531818 | 4,730552112 | 1,15504E-22 | 2,26328E-21 |
| LNX2      | -1,093221997 | 6,065255267 | 1,25117E-22 | 2,44461E-21 |
| EZH1      | -0,889737647 | 5,515034352 | 1,31737E-22 | 2,56661E-21 |
| KIAA0247  | -0,931443956 | 7,230017491 | 1,57611E-22 | 3,06196E-21 |
| LILRA6    | -1,342293098 | 4,320694396 | 1,59792E-22 | 3,09551E-21 |
| HMGCS1    | -1,334965542 | 6,866019746 | 1,67471E-22 | 3,23508E-21 |
| TMOD3     | -0,775282899 | 7,193287439 | 1,87068E-22 | 3,60344E-21 |
| DOCK11    | -1,33055319  | 5,572027607 | 2,09574E-22 | 4,02559E-21 |
| TMEM109   | -0,676786032 | 7,558729724 | 2,16977E-22 | 4,15608E-21 |
| TBRG4     | 1,031945257  | 6,232788964 | 2,20478E-22 | 4,21132E-21 |
| DNAJA3    | 0,775213984  | 6,275201388 | 2,27398E-22 | 4,33135E-21 |
| RFC4      | 1,720725825  | 4,537472774 | 2,33401E-22 | 4,43331E-21 |
| ACTL6A    | 1,091266071  | 6,381495848 | 2,3997E-22  | 4,54544E-21 |
| TRAK2     | -0,8543475   | 6,678197442 | 2,42258E-22 | 4,57606E-21 |
| AIMP2     | 1,119358271  | 5,157873736 | 2,47152E-22 | 4,6556E-21  |
| GPI       | 1,199525501  | 8,782525089 | 2,52538E-22 | 4,74396E-21 |
| RAB11FIP1 | -1,507370862 | 8,934613432 | 2,8736E-22  | 5,38326E-21 |
| HSPA5     | 0,796544694  | 10,29359791 | 3,09041E-22 | 5,77357E-21 |
| EPCAM     | 1,569149819  | 9,245991983 | 3,35907E-22 | 6,25833E-21 |
| APBB1     | -1,36107851  | 5,370265872 | 3,50606E-22 | 6,5144E-21  |
| ARRB2     | -0,908781009 | 6,494778224 | 3,89715E-22 | 7,22138E-21 |
| HSPE1     | 1,364585581  | 7,255586789 | 4,0669E-22  | 7,51549E-21 |
| C15orf48  | 3,523812108  | 6,635648909 | 4,12402E-22 | 7,60046E-21 |
| IL7R      | -1,957979871 | 5,25303607  | 4,21913E-22 | 7,75479E-21 |
| PPIF      | 1,155603634  | 6,33555918  | 4,80427E-22 | 8,80654E-21 |
| HECA      | -0,982833088 | 5,958817104 | 4,95316E-22 | 9,05512E-21 |
| NCAPG2    | 1,661011936  | 5,147510837 | 4,97153E-22 | 9,0644E-21  |
| DBF4      | 1,444745138  | 4,410121775 | 5,18498E-22 | 9,42836E-21 |
| AVL9      | 1,165595461  | 5,046309938 | 5,213E-22   | 9,45411E-21 |
| KIAA1524  | 2,053982538  | 3,616918031 | 5,30911E-22 | 9,58135E-21 |
| PMM2      | 0,965589978  | 6,230396856 | 5,31126E-22 | 9,58135E-21 |
| PFKP      | 2,092428891  | 7,598954721 | 5,43366E-22 | 9,77629E-21 |
| SORD      | 1,435064272  | 6,024216317 | 5,66462E-22 | 1,0165E-20  |
| SMAD7     | -1,151555773 | 5,638706063 | 6,41623E-22 | 1,14835E-20 |
| UBE2S     | 2,052807386  | 5,818527379 | 6,83498E-22 | 1,2201E-20  |
| INO80     | -0,77120473  | 5,735949158 | 8,1868E-22  | 1,45759E-20 |
| C1orf131  | 0,843647447  | 4,0930042   | 8,32795E-22 | 1,47886E-20 |
| E2F3      | 1,260304269  | 5,1903632   | 9,16548E-22 | 1,62336E-20 |
| NUP155    | 1,352754888  | 5,460030758 | 9,73892E-22 | 1,72046E-20 |
| SNX2      | -0,72586641  | 6,838742809 | 1,00773E-21 | 1,77564E-20 |
| OLA1      | 1,032554701  | 7,030139205 | 1,0364E-21  | 1,82144E-20 |
| MRPL12    | 1,355411245  | 5,854002933 | 1,20821E-21 | 2,11795E-20 |
| KDEL2     | 0,995855782  | 8,936274974 | 1,32323E-21 | 2,31361E-20 |
| SRM       | 1,085646764  | 6,28064107  | 1,33049E-21 | 2,32036E-20 |
| BPHL      | 1,311800874  | 4,956454903 | 1,36643E-21 | 2,37696E-20 |
| SLC35B1   | 0,81294059   | 6,445300815 | 1,38062E-21 | 2,39554E-20 |
| IL18R1    | -1,668920506 | 3,198960849 | 1,4538E-21  | 2,51611E-20 |
| COL5A2    | 2,293662917  | 7,872467245 | 1,54084E-21 | 2,66E-20    |

|          |              |             |             |             |
|----------|--------------|-------------|-------------|-------------|
| FAM53B   | -0,986280435 | 5,88070227  | 1,55577E-21 | 2,67898E-20 |
| FIBIN    | -1,920422811 | 4,606979135 | 1,6566E-21  | 2,84543E-20 |
| TUBG1    | 1,220869522  | 5,923839663 | 1,73518E-21 | 2,96585E-20 |
| PLEKHA1  | -0,903960797 | 6,508204497 | 1,7354E-21  | 2,96585E-20 |
| KLF2     | -1,612583525 | 5,586847443 | 1,79527E-21 | 3,06048E-20 |
| DTYMK    | 1,431222563  | 5,385677909 | 1,85447E-21 | 3,15352E-20 |
| IDH2     | 1,197241349  | 7,379539054 | 2,12884E-21 | 3,61108E-20 |
| SEC22C   | -0,692423058 | 5,319729301 | 2,36275E-21 | 3,99792E-20 |
| SIK2     | -1,040690538 | 5,927620546 | 2,62865E-21 | 4,43041E-20 |
| NAT9     | 0,916924168  | 5,383485089 | 2,63135E-21 | 4,43041E-20 |
| UBFD1    | 0,798650969  | 6,509971773 | 3,0792E-21  | 5,1717E-20  |
| SEPT10   | -0,956204801 | 6,887247979 | 3,12901E-21 | 5,24243E-20 |
| ARRDC4   | -1,22693711  | 5,323356099 | 3,36898E-21 | 5,63065E-20 |
| FAM122A  | -0,639094044 | 4,789663719 | 3,54706E-21 | 5,9138E-20  |
| BRX1     | 1,184529691  | 5,896514018 | 3,69636E-21 | 6,14767E-20 |
| FBXW2    | -0,726491751 | 6,694166104 | 3,75534E-21 | 6,23057E-20 |
| SRPX2    | 2,719101597  | 5,344343991 | 3,88604E-21 | 6,43177E-20 |
| DAP3     | 0,952644862  | 7,270567427 | 3,90866E-21 | 6,45354E-20 |
| HLA-E    | -1,059917443 | 10,16923658 | 3,9756E-21  | 6,54822E-20 |
| MFAP2    | 2,009208126  | 5,726085836 | 4,03918E-21 | 6,6369E-20  |
| HERC1    | -1,053448223 | 6,279453687 | 4,09764E-21 | 6,71679E-20 |
| DUSP8    | -1,270352393 | 4,703018424 | 4,19931E-21 | 6,86692E-20 |
| ADAM8    | 2,048576816  | 6,142698751 | 4,32125E-21 | 7,04943E-20 |
| KLF10    | -1,110039583 | 7,077802358 | 4,72153E-21 | 7,68403E-20 |
| SGPL1    | 0,960900585  | 7,222845877 | 4,84569E-21 | 7,86732E-20 |
| SGOL2    | 1,517788279  | 3,693465509 | 5,01816E-21 | 8,12798E-20 |
| DST      | -1,519779307 | 7,646868982 | 5,10848E-21 | 8,25468E-20 |
| DHCR24   | -1,188875103 | 10,08006737 | 5,54474E-21 | 8,93843E-20 |
| TMEM69   | 0,78483054   | 5,132266568 | 5,7462E-21  | 9,24127E-20 |
| EMP1     | -1,682816849 | 8,257839012 | 5,7597E-21  | 9,24127E-20 |
| TBC1D9   | -0,932375891 | 6,269958457 | 6,1537E-21  | 9,85026E-20 |
| MTHFD2   | 1,715117109  | 6,808683866 | 6,28108E-21 | 1,00306E-19 |
| PIK3R5   | -1,357373002 | 4,644324998 | 6,44141E-21 | 1,02626E-19 |
| ARHGAP18 | -1,046811449 | 6,574979855 | 6,76863E-21 | 1,07588E-19 |
| ZNF331   | -1,248827427 | 5,535945367 | 6,83796E-21 | 1,08437E-19 |
| AHCY     | 1,150231513  | 7,951281919 | 7,21428E-21 | 1,1414E-19  |
| SEMA4B   | 1,485503396  | 7,818689851 | 7,36628E-21 | 1,16275E-19 |
| CYR61    | -1,589920776 | 8,47329219  | 8,53278E-21 | 1,34376E-19 |
| RXRA     | -0,879151222 | 6,952595871 | 8,86936E-21 | 1,39355E-19 |
| LSM12    | 0,764800931  | 6,601873713 | 9,47092E-21 | 1,48465E-19 |
| METTL1   | 1,54232431   | 5,06788341  | 1,03074E-20 | 1,61207E-19 |
| MTFR1    | 1,332693844  | 5,645757743 | 1,05854E-20 | 1,65176E-19 |
| GNL3     | 0,946980105  | 6,700925473 | 1,07113E-20 | 1,66759E-19 |
| NCF2     | -1,495668753 | 6,540743049 | 1,10726E-20 | 1,71991E-19 |
| ABCC3    | 2,298188993  | 8,000180294 | 1,13859E-20 | 1,76455E-19 |
| LRRC59   | 0,924456009  | 8,1418153   | 1,25167E-20 | 1,93541E-19 |
| MRPL9    | 1,025723376  | 6,320440083 | 1,3171E-20  | 2,03185E-19 |
| PDZD11   | 1,083233878  | 5,861778318 | 1,32E-20    | 2,03185E-19 |
| CTGF     | -1,525062632 | 8,55174032  | 1,45127E-20 | 2,22887E-19 |
| TMEM110  | -0,707769309 | 3,889541993 | 1,64351E-20 | 2,51845E-19 |

|           |              |             |             |             |
|-----------|--------------|-------------|-------------|-------------|
| PARD6B    | -1,126598889 | 5,250086519 | 1,70148E-20 | 2,60143E-19 |
| TMEM48    | 1,079240422  | 4,491609598 | 1,75686E-20 | 2,68009E-19 |
| CBX3      | 1,037002854  | 8,102219278 | 1,82663E-20 | 2,78032E-19 |
| GPNPAT1   | 1,506136104  | 6,44895399  | 1,85238E-20 | 2,81322E-19 |
| BUB3      | 0,755966883  | 6,879257573 | 1,96359E-20 | 2,97549E-19 |
| GPR89A    | 0,890094943  | 4,774603473 | 2,0749E-20  | 3,1372E-19  |
| SYNJ2     | 1,337034803  | 4,829768227 | 2,23961E-20 | 3,37873E-19 |
| PSMD11    | 0,958750735  | 6,731041588 | 2,36136E-20 | 3,55455E-19 |
| EGLN3     | 2,85499268   | 6,064862479 | 2,7593E-20  | 4,14441E-19 |
| MYO9A     | -1,148798777 | 4,85715899  | 3,07197E-20 | 4,6039E-19  |
| ARRB1     | -1,193259087 | 6,392425795 | 3,10664E-20 | 4,64565E-19 |
| TXNDC17   | 1,783541761  | 6,801619414 | 3,14911E-20 | 4,69886E-19 |
| DNAJC9    | 0,931191916  | 5,571517662 | 3,274E-20   | 4,87454E-19 |
| SYNE1     | -1,596783421 | 7,416245695 | 3,32062E-20 | 4,93319E-19 |
| CCDC50    | -0,970889024 | 6,564472594 | 3,38339E-20 | 5,0155E-19  |
| DAPK1     | -1,403363604 | 7,199864335 | 3,441E-20   | 5,08985E-19 |
| STOM      | -1,157311626 | 9,043479007 | 3,44915E-20 | 5,09086E-19 |
| NUMB      | -0,651916759 | 7,026558561 | 3,54691E-20 | 5,22383E-19 |
| SH3BGRL   | -0,838993574 | 7,56700506  | 3,71138E-20 | 5,4543E-19  |
| LONRF1    | -1,047306709 | 4,725458505 | 3,77338E-20 | 5,53348E-19 |
| CNP       | 0,862316963  | 7,220910869 | 3,93195E-20 | 5,75364E-19 |
| SUN2      | -0,82726683  | 7,764950275 | 4,30796E-20 | 6,29035E-19 |
| APC       | -0,944541854 | 5,454320467 | 4,72433E-20 | 6,88359E-19 |
| IPO4      | 0,854795683  | 6,438210898 | 4,74363E-20 | 6,89698E-19 |
| ATAD3A    | 1,057758249  | 5,478335416 | 5,0287E-20  | 7,2959E-19  |
| H2AFX     | 1,288120763  | 5,855897542 | 5,07871E-20 | 7,35281E-19 |
| NIPSNAP1  | 1,145134324  | 6,760266708 | 5,11076E-20 | 7,38354E-19 |
| LRR8C     | -1,141815639 | 5,172787874 | 5,19131E-20 | 7,48405E-19 |
| HDGF      | 0,972316412  | 8,99451107  | 5,2568E-20  | 7,56248E-19 |
| NEK7      | -0,925483338 | 7,136613158 | 5,71025E-20 | 8,19751E-19 |
| NR4A3     | -2,290464171 | 5,126875008 | 5,74197E-20 | 8,22574E-19 |
| WDR75     | 0,654452381  | 5,611477263 | 5,9362E-20  | 8,48615E-19 |
| SRPRB     | 1,064495457  | 6,803131196 | 6,01312E-20 | 8,57812E-19 |
| ARHGAP11A | 1,586580807  | 4,680560382 | 6,25018E-20 | 8,8977E-19  |
| SSR4      | 1,560716964  | 8,819545574 | 6,33949E-20 | 9,00603E-19 |
| GORASP1   | -0,572375505 | 5,957165542 | 6,74639E-20 | 9,56416E-19 |
| MEST      | 1,571700012  | 6,712062178 | 7,34729E-20 | 1,03944E-18 |
| PRMT3     | 0,850456418  | 4,47185454  | 7,42869E-20 | 1,04878E-18 |
| DDX56     | 0,803624821  | 6,608556341 | 8,05015E-20 | 1,13417E-18 |
| THOC3     | 1,084646706  | 5,302508069 | 1,0076E-19  | 1,41667E-18 |
| SLCO2A1   | -1,786361384 | 7,133923719 | 1,02627E-19 | 1,43994E-18 |
| PFDN6     | 1,066433842  | 5,484844217 | 1,07793E-19 | 1,50932E-18 |
| SMARCA2   | -1,088377915 | 7,006835323 | 1,35482E-19 | 1,89314E-18 |
| B3GNT2    | -0,851552842 | 6,14306087  | 1,36417E-19 | 1,90231E-18 |
| SRD5A3    | 1,776102109  | 6,690415618 | 1,48595E-19 | 2,06789E-18 |
| PPM1D     | -0,813549166 | 4,620379367 | 1,54481E-19 | 2,14542E-18 |
| HPCAL1    | -1,07485929  | 7,154712238 | 1,55028E-19 | 2,14865E-18 |
| RANBP10   | -0,957293196 | 5,075515152 | 1,61857E-19 | 2,23874E-18 |
| CALU      | 1,099189873  | 8,559851788 | 1,71115E-19 | 2,36201E-18 |
| PLAU      | 2,751847334  | 7,941011098 | 1,83048E-19 | 2,52162E-18 |

|          |              |             |             |             |
|----------|--------------|-------------|-------------|-------------|
| SH3D19   | -0,871434461 | 6,80548071  | 2,12871E-19 | 2,92655E-18 |
| FADD     | 0,837265001  | 5,478733904 | 2,30399E-19 | 3,16115E-18 |
| PDIA6    | 1,122172159  | 9,19746739  | 2,39817E-19 | 3,28376E-18 |
| EGR2     | -1,57552238  | 4,875046656 | 2,42726E-19 | 3,31065E-18 |
| ETV5     | -1,19827609  | 6,551318339 | 2,42752E-19 | 3,31065E-18 |
| COL5A1   | 2,198338248  | 8,548703073 | 2,55579E-19 | 3,47863E-18 |
| XPO5     | 0,953956251  | 6,190252488 | 2,61583E-19 | 3,55325E-18 |
| ITM2C    | 1,437621501  | 7,646530877 | 2,81444E-19 | 3,81544E-18 |
| RABIF    | 0,740770907  | 4,870036147 | 2,95369E-19 | 3,99627E-18 |
| CBX4     | 0,95912277   | 5,636723202 | 3,03332E-19 | 4,09588E-18 |
| NEDD4L   | -1,291149983 | 7,574786285 | 3,27513E-19 | 4,41366E-18 |
| YWHAZ    | 0,856719186  | 10,57730839 | 3,38807E-19 | 4,55685E-18 |
| SULF1    | 2,425710796  | 7,619708575 | 3,47145E-19 | 4,6598E-18  |
| ABI2     | -0,719312255 | 6,328330437 | 3,60695E-19 | 4,83219E-18 |
| NUP85    | 0,771510046  | 5,704255571 | 3,72614E-19 | 4,98207E-18 |
| SLC7A7   | -1,254774457 | 6,214125838 | 3,73959E-19 | 4,99027E-18 |
| TMED3    | 1,354105554  | 7,625874368 | 3,78276E-19 | 5,03802E-18 |
| HK3      | -1,733646469 | 5,034909984 | 3,91932E-19 | 5,20972E-18 |
| GATA6    | -1,817263486 | 5,029276333 | 4,24468E-19 | 5,63122E-18 |
| FAM188B  | -1,076378917 | 4,412672889 | 4,29236E-19 | 5,68342E-18 |
| STON1    | -1,21336475  | 4,282476823 | 4,32631E-19 | 5,71727E-18 |
| UACA     | -1,091185024 | 6,086458385 | 4,70051E-19 | 6,19976E-18 |
| MRPL37   | 0,750476327  | 6,464814697 | 4,97357E-19 | 6,54725E-18 |
| PYGO2    | 0,802719742  | 6,62998648  | 5,01051E-19 | 6,5751E-18  |
| CALR     | 0,754476314  | 10,653457   | 5,01401E-19 | 6,5751E-18  |
| DOLPP1   | 0,835814317  | 4,898423796 | 5,75829E-19 | 7,53662E-18 |
| PMP22    | -1,068003282 | 7,101750527 | 5,99896E-19 | 7,83657E-18 |
| AKAP11   | -0,79199527  | 6,372788152 | 6,36728E-19 | 8,30181E-18 |
| NQO1     | 2,936907765  | 8,629249711 | 6,40933E-19 | 8,3407E-18  |
| SNRPC    | 0,926795062  | 6,748926089 | 6,77567E-19 | 8,80062E-18 |
| SPATS2   | 0,905397748  | 5,64884657  | 7,12702E-19 | 9,23938E-18 |
| USP12    | -0,957627959 | 4,732143181 | 7,25014E-19 | 9,38116E-18 |
| DUS1L    | 0,967479239  | 6,791102576 | 7,37242E-19 | 9,52131E-18 |
| CYGB     | -1,091497587 | 4,801647507 | 7,39018E-19 | 9,5262E-18  |
| ARHGEF3  | -0,826229381 | 6,029705603 | 7,77651E-19 | 1,00053E-17 |
| CHPF     | 1,160734438  | 7,43554274  | 8,04041E-19 | 1,03253E-17 |
| ASNS     | 1,590315251  | 5,603350196 | 8,16384E-19 | 1,04641E-17 |
| SRF      | -0,774259654 | 6,455559097 | 9,77729E-19 | 1,25087E-17 |
| MC1R     | 1,770670747  | 3,087855296 | 9,94819E-19 | 1,27035E-17 |
| NFIX     | -1,536113792 | 7,227912697 | 1,08669E-18 | 1,38508E-17 |
| C17orf62 | 0,749601108  | 6,98642984  | 1,18389E-18 | 1,50615E-17 |
| NFYB     | -0,685694954 | 5,52802243  | 1,19274E-18 | 1,51458E-17 |
| TJP2     | -1,013628628 | 7,057167609 | 1,21579E-18 | 1,54098E-17 |
| SEC14L1  | -1,077375671 | 7,349957354 | 1,31905E-18 | 1,66876E-17 |
| PPP2CB   | -0,773925383 | 7,289722893 | 1,33559E-18 | 1,68656E-17 |
| TRIM25   | -0,866647789 | 6,118817636 | 1,33981E-18 | 1,68876E-17 |
| EVL      | -1,010485321 | 6,696119986 | 1,54215E-18 | 1,9367E-17  |
| NSUN5    | 0,913782862  | 5,380214088 | 1,5422E-18  | 1,9367E-17  |
| PGAM5    | 1,070566342  | 5,259459662 | 1,61748E-18 | 2,02749E-17 |
| NOL10    | 0,628744712  | 5,453768909 | 1,73817E-18 | 2,17478E-17 |

|           |              |             |             |             |
|-----------|--------------|-------------|-------------|-------------|
| TSTA3     | 1,369148573  | 7,089459712 | 1,74942E-18 | 2,18485E-17 |
| CENPH     | 1,274908132  | 3,577318193 | 1,78629E-18 | 2,22682E-17 |
| MTX2      | 0,816590213  | 5,680627039 | 1,89506E-18 | 2,35811E-17 |
| TIMM17A   | 0,841410802  | 6,367621417 | 1,90445E-18 | 2,36548E-17 |
| STAT5B    | -0,658651884 | 6,588444456 | 2,04882E-18 | 2,53985E-17 |
| MPP6      | 1,46045644   | 2,78301899  | 2,05229E-18 | 2,53985E-17 |
| TXNDC5    | 0,955938816  | 9,110329514 | 2,08856E-18 | 2,58006E-17 |
| R3HDM1    | 0,784969009  | 5,326088499 | 2,14977E-18 | 2,65087E-17 |
| TSPYL1    | -0,795150027 | 6,979253179 | 2,17895E-18 | 2,68199E-17 |
| ALDH2     | -1,26190045  | 8,929940913 | 2,24552E-18 | 2,75895E-17 |
| CNPY2     | 1,082194908  | 6,92813442  | 2,2695E-18  | 2,7834E-17  |
| PABPC1    | 1,011928325  | 10,9126224  | 2,4317E-18  | 2,97698E-17 |
| SLC25A13  | 0,970402366  | 5,465896308 | 2,57273E-18 | 3,14399E-17 |
| DECR2     | 1,180775641  | 4,795788858 | 2,6029E-18  | 3,17516E-17 |
| FAM105A   | -1,569590208 | 6,291203387 | 2,63341E-18 | 3,20665E-17 |
| APEX1     | 0,800571036  | 7,591564527 | 2,751E-18   | 3,34386E-17 |
| MRPL15    | 1,240174002  | 6,262638201 | 2,75977E-18 | 3,34856E-17 |
| BCL2L12   | 0,958643279  | 4,447975643 | 2,84656E-18 | 3,44772E-17 |
| TLR4      | -1,381399441 | 5,582005042 | 2,94034E-18 | 3,55499E-17 |
| HEATR1    | 0,746407455  | 6,125202164 | 2,99428E-18 | 3,61381E-17 |
| HMOX1     | -1,836962194 | 7,25563733  | 3,27412E-18 | 3,94456E-17 |
| PREB      | 0,795601631  | 6,528275084 | 3,31573E-18 | 3,98765E-17 |
| CLDN12    | 1,078531642  | 6,551768035 | 3,47685E-18 | 4,17406E-17 |
| FBXL3     | -0,733160324 | 6,379989397 | 3,64112E-18 | 4,36359E-17 |
| LOC728554 | 1,14648401   | 4,765747383 | 3,67421E-18 | 4,39463E-17 |
| ZCCHC24   | -0,998907293 | 5,664946909 | 3,67991E-18 | 4,39463E-17 |
| SBDS      | -0,774098213 | 7,125274268 | 3,75106E-18 | 4,47177E-17 |
| ATXN1L    | -0,817624505 | 6,180377752 | 3,80945E-18 | 4,53344E-17 |
| H1FO      | 1,142444073  | 8,667118974 | 4,06085E-18 | 4,82421E-17 |
| WBP4      | -0,618980367 | 4,392364159 | 4,17561E-18 | 4,95191E-17 |
| RNH1      | -0,618216642 | 7,967308537 | 4,26128E-18 | 5,04473E-17 |
| ADCY9     | -1,279314121 | 6,306103837 | 4,32276E-18 | 5,10864E-17 |
| HPS3      | 1,651624006  | 7,028982943 | 4,50548E-18 | 5,31538E-17 |
| LAGE3     | 1,314486551  | 5,067020373 | 4,89903E-18 | 5,76968E-17 |
| C10orf10  | -1,506783811 | 7,870153448 | 4,95343E-18 | 5,8237E-17  |
| SNRPA1    | 1,029499402  | 5,429857969 | 5,49658E-18 | 6,45115E-17 |
| BAK1      | 1,038017016  | 6,079916271 | 5,53581E-18 | 6,48603E-17 |
| PCF11     | -0,742017071 | 5,972828727 | 5,68665E-18 | 6,65133E-17 |
| MAP4      | -0,793874056 | 8,468444903 | 5,92467E-18 | 6,91787E-17 |
| C12orf45  | 1,06337587   | 3,786877843 | 6,59892E-18 | 7,69197E-17 |
| MTX1      | 1,002020726  | 5,84310427  | 6,7302E-18  | 7,83161E-17 |
| PUS7L     | 1,018186832  | 3,53398666  | 7,36348E-18 | 8,55393E-17 |
| ARNTL2    | 2,693357825  | 4,114456445 | 7,70789E-18 | 8,9388E-17  |
| ATXN3     | -0,565365185 | 5,065207106 | 7,98321E-18 | 9,24236E-17 |
| MRT04     | 0,98749968   | 6,119476366 | 8,18907E-18 | 9,46462E-17 |
| MRPS30    | 0,875039831  | 5,059998606 | 8,5689E-18  | 9,88686E-17 |
| EIF6      | 0,864858415  | 7,606912584 | 8,73345E-18 | 1,00597E-16 |
| ALG8      | 0,887884928  | 5,680099395 | 8,77075E-18 | 1,00856E-16 |
| TARS      | 0,959091509  | 7,082118592 | 9,12777E-18 | 1,04646E-16 |
| LZTFL1    | -0,829524547 | 5,246183288 | 9,13097E-18 | 1,04646E-16 |

|          |              |             |             |             |
|----------|--------------|-------------|-------------|-------------|
| DOCK6    | -0,909859436 | 6,12038457  | 9,243E-18   | 1,05752E-16 |
| KIAA0355 | -0,778856809 | 5,801136064 | 9,66993E-18 | 1,10451E-16 |
| MXD4     | -0,759342109 | 6,853316674 | 9,79149E-18 | 1,11652E-16 |
| TWF1     | 1,052208942  | 7,512483634 | 1,02345E-17 | 1,16509E-16 |
| ABHD5    | -0,764088248 | 5,706850971 | 1,23186E-17 | 1,4E-16     |
| SNRNP25  | 1,045847101  | 5,342053755 | 1,25437E-17 | 1,42322E-16 |
| MPHOSPH8 | -0,735528718 | 5,873897336 | 1,39294E-17 | 1,57782E-16 |
| UTP6     | 0,621486956  | 5,898097436 | 1,46823E-17 | 1,66034E-16 |
| HOXA5    | -1,545477711 | 3,01334238  | 1,47875E-17 | 1,66948E-16 |
| RPE      | 0,816548293  | 5,711953004 | 1,55358E-17 | 1,75105E-16 |
| CCDC86   | 0,954590875  | 5,194336377 | 1,5772E-17  | 1,77474E-16 |
| CYP27A1  | -1,517913734 | 7,19247513  | 1,65634E-17 | 1,86072E-16 |
| GPR89C   | 0,844827226  | 3,207003826 | 1,68448E-17 | 1,88922E-16 |
| C1orf85  | 0,933643891  | 6,857898667 | 1,72786E-17 | 1,93469E-16 |
| SREBF2   | -0,901252652 | 8,01341144  | 1,73909E-17 | 1,94407E-16 |
| TDRD3    | -0,821278646 | 4,491657782 | 1,75656E-17 | 1,96039E-16 |
| ANKRD40  | -0,566897522 | 6,714532036 | 1,78255E-17 | 1,98614E-16 |
| MYO1F    | -1,163377636 | 5,770119958 | 1,79495E-17 | 1,9967E-16  |
| CD68     | -1,226036755 | 9,053525608 | 1,84767E-17 | 2,05199E-16 |
| GARS     | 1,009434438  | 7,412589421 | 2,00036E-17 | 2,21579E-16 |
| DDX5     | -0,598375637 | 9,59221014  | 2,00165E-17 | 2,21579E-16 |
| TTYH3    | 1,449468387  | 7,510084725 | 2,01534E-17 | 2,22733E-16 |
| PSMD12   | 0,739021168  | 6,032075182 | 2,05802E-17 | 2,27082E-16 |
| INCENP   | 1,192899451  | 4,774797352 | 2,08547E-17 | 2,29738E-16 |
| PLOD2    | 2,175532302  | 7,374701294 | 2,13584E-17 | 2,34908E-16 |
| FTO      | -0,799436137 | 6,229937706 | 2,16604E-17 | 2,37846E-16 |
| MARS2    | 0,907038415  | 3,728138915 | 2,19496E-17 | 2,40634E-16 |
| HNRNPC   | 0,672510507  | 9,473384224 | 2,30605E-17 | 2,52407E-16 |
| PSMB4    | 1,010471024  | 8,387841873 | 2,42433E-17 | 2,64928E-16 |
| DENND4A  | -0,856810573 | 5,051211632 | 2,51296E-17 | 2,74174E-16 |
| RAB34    | 0,959364142  | 7,066822758 | 2,55063E-17 | 2,77839E-16 |
| PLEKHA8  | 0,972696471  | 3,189951826 | 2,80556E-17 | 3,05122E-16 |
| ERAL1    | 0,621782331  | 6,131811995 | 3,07716E-17 | 3,34126E-16 |
| EPRS     | 0,748316217  | 7,747202706 | 3,23266E-17 | 3,50453E-16 |
| COLEC12  | -1,600046723 | 6,447335772 | 3,36748E-17 | 3,6449E-16  |
| CWF19L2  | -0,636018712 | 4,5660344   | 3,4405E-17  | 3,71803E-16 |
| STX7     | -0,718024866 | 6,600819295 | 3,51705E-17 | 3,79475E-16 |
| COASY    | 0,757604218  | 6,716728947 | 3,76722E-17 | 4,05824E-16 |
| NFKBIZ   | -1,53019549  | 6,26020092  | 3,94485E-17 | 4,2429E-16  |
| PDCD6    | 1,106588687  | 7,311279671 | 4,02106E-17 | 4,31805E-16 |
| CRYAB    | -1,730970451 | 4,517816193 | 4,03319E-17 | 4,32426E-16 |
| HIST1H4H | 2,043745294  | 2,886657632 | 4,22451E-17 | 4,52229E-16 |
| KIF18A   | 1,368395665  | 3,271366811 | 4,44035E-17 | 4,74588E-16 |
| UBASH3B  | -1,356948973 | 4,937306845 | 4,47985E-17 | 4,78061E-16 |
| DOT1L    | -0,979409759 | 5,575090997 | 4,51205E-17 | 4,80744E-16 |
| ZMYND19  | 0,910517852  | 4,447127404 | 4,69327E-17 | 4,99273E-16 |
| ZNF207   | 0,479997248  | 7,712086219 | 4,77874E-17 | 5,07574E-16 |
| CACYBP   | 0,899501359  | 6,97803488  | 4,81021E-17 | 5,10121E-16 |
| PPM1G    | 0,658269667  | 7,547372054 | 4,86116E-17 | 5,14725E-16 |
| NDRG2    | -1,365575116 | 6,344534338 | 4,89727E-17 | 5,17744E-16 |

|         |              |             |             |             |
|---------|--------------|-------------|-------------|-------------|
| VASH1   | -1,059801369 | 5,780317974 | 5,35088E-17 | 5,64825E-16 |
| PDCD6IP | -0,546045244 | 7,755213086 | 5,40347E-17 | 5,69494E-16 |
| IARS2   | 0,70760506   | 7,579221062 | 5,53399E-17 | 5,8235E-16  |
| NDEL1   | -0,669041106 | 5,95710945  | 5,54989E-17 | 5,83124E-16 |
| PTGES2  | 0,783039753  | 5,676710195 | 5,64015E-17 | 5,91695E-16 |
| RMI1    | 0,869811194  | 4,329467184 | 5,68066E-17 | 5,95029E-16 |
| MFSD2A  | -1,630765084 | 6,524430265 | 5,75247E-17 | 6,01628E-16 |
| TSPAN6  | 1,230051074  | 6,541352983 | 5,82758E-17 | 6,0855E-16  |
| PITPNA  | -0,568459222 | 6,998145427 | 5,99841E-17 | 6,2543E-16  |
| PFKFB2  | -1,072361903 | 6,165866779 | 6,13709E-17 | 6,38913E-16 |
| HPRT1   | 1,132305137  | 5,720183714 | 6,16157E-17 | 6,40484E-16 |
| PALB2   | 0,661688935  | 4,360563025 | 6,17844E-17 | 6,4126E-16  |
| TAOK2   | -0,747607661 | 6,619363112 | 6,24436E-17 | 6,47117E-16 |
| ITGAL   | -1,293853409 | 6,094967604 | 6,27287E-17 | 6,49085E-16 |
| GFPT1   | 0,969017739  | 7,911790515 | 6,40574E-17 | 6,61829E-16 |
| EIF2B2  | 0,653797126  | 5,313771297 | 6,46752E-17 | 6,67202E-16 |
| HDAC1   | 0,772555876  | 7,404962926 | 6,96022E-17 | 7,16945E-16 |
| LRRK2   | -2,265646001 | 8,012926648 | 7,28535E-17 | 7,49304E-16 |
| TNFAIP1 | -0,620752657 | 6,959349581 | 7,34369E-17 | 7,54166E-16 |
| PREX1   | -1,193913977 | 6,539588036 | 7,3921E-17  | 7,57996E-16 |
| PLEKHO2 | -0,994505217 | 6,627396045 | 7,69297E-17 | 7,87663E-16 |
| DHFR    | 1,008812639  | 5,907091911 | 7,78075E-17 | 7,95457E-16 |
| CKAP2   | 1,24855219   | 5,24390654  | 7,86172E-17 | 8,02531E-16 |
| FANCF   | 0,748214199  | 4,777714357 | 7,9404E-17  | 8,09351E-16 |
| LIMK1   | 1,142835184  | 6,898696081 | 8,20319E-17 | 8,34889E-16 |
| INTS7   | 0,731233161  | 5,361799804 | 8,28821E-17 | 8,42285E-16 |
| MRPL24  | 1,140907704  | 6,365992053 | 9,34646E-17 | 9,48416E-16 |
| CHTF18  | 1,281612034  | 3,866946199 | 9,54085E-17 | 9,66702E-16 |
| IL4I1   | 1,690630132  | 4,809229298 | 9,88422E-17 | 1,00001E-15 |
| MSI2    | 1,068656089  | 4,668825633 | 1,05356E-16 | 1,06433E-15 |
| PSMD14  | 0,96939097   | 6,846000517 | 1,06491E-16 | 1,0742E-15  |
| DPP3    | 0,807539101  | 6,434577304 | 1,07083E-16 | 1,07858E-15 |
| PSMD4   | 0,829047186  | 7,739966601 | 1,16015E-16 | 1,16682E-15 |
| IGFBP3  | 2,32817109   | 8,798873421 | 1,19997E-16 | 1,20509E-15 |
| KANK1   | -0,934443397 | 5,835402023 | 1,23349E-16 | 1,23694E-15 |
| EPS15   | -0,475930906 | 6,818708906 | 1,24838E-16 | 1,25003E-15 |
| DARS    | 0,630151851  | 7,02953206  | 1,31973E-16 | 1,31954E-15 |
| PARP1   | 0,919287309  | 7,955441192 | 1,4225E-16  | 1,42021E-15 |
| SMUG1   | 1,019573794  | 5,44835047  | 1,4296E-16  | 1,42521E-15 |
| LAPTM4B | 1,37019551   | 8,736042281 | 1,51483E-16 | 1,50798E-15 |
| SLC6A8  | 1,899495873  | 5,775613339 | 1,586E-16   | 1,57652E-15 |
| CSRP1   | -0,803055458 | 8,750557354 | 1,749E-16   | 1,73537E-15 |
| MRPL36  | 1,234513132  | 5,110203466 | 1,7509E-16  | 1,73537E-15 |
| KRTCAP2 | 1,106839687  | 7,323735356 | 1,80684E-16 | 1,78822E-15 |
| UNG     | 0,93053276   | 5,796433148 | 1,82618E-16 | 1,80474E-15 |
| DAP     | 1,055034833  | 8,41483266  | 1,8713E-16  | 1,84665E-15 |
| ITGAX   | -1,338939354 | 6,161111726 | 1,87832E-16 | 1,8509E-15  |
| GMPS    | 0,907251354  | 6,31911818  | 1,88267E-16 | 1,85251E-15 |
| FKBP10  | 2,15339372   | 7,505452276 | 1,88821E-16 | 1,85529E-15 |
| SNX25   | -1,310906645 | 6,089654362 | 1,96492E-16 | 1,92789E-15 |



|          |              |             |             |             |
|----------|--------------|-------------|-------------|-------------|
| CIRBP    | -0,864711815 | 8,084651326 | 2,21962E-16 | 2,17316E-15 |
| STT3A    | 0,736373823  | 7,887112286 | 2,22128E-16 | 2,17316E-15 |
| RBMS1    | -0,663353022 | 7,085721124 | 2,27045E-16 | 2,21808E-15 |
| SIRPA    | -1,092489911 | 6,897753358 | 2,3218E-16  | 2,265E-15   |
| RPP21    | 0,944543683  | 4,379434786 | 2,32572E-16 | 2,26559E-15 |
| RAB8B    | -0,888447466 | 5,965142395 | 2,45083E-16 | 2,38406E-15 |
| ZMYND11  | -0,622988633 | 6,910227494 | 2,47066E-16 | 2,39992E-15 |
| CLNS1A   | 0,781717293  | 6,610768808 | 2,48817E-16 | 2,41349E-15 |
| IARS     | 0,690672194  | 7,342674323 | 2,51889E-16 | 2,43982E-15 |
| IMP4     | 0,73930477   | 5,720647549 | 2,62198E-16 | 2,53607E-15 |
| SUSD2    | -2,301762921 | 8,700268769 | 2,64715E-16 | 2,55679E-15 |
| UQCRHL   | 1,122002105  | 3,95802517  | 2,69798E-16 | 2,6022E-15  |
| RCC2     | 0,965365578  | 7,762301609 | 2,78117E-16 | 2,67865E-15 |
| MICAL1   | -0,865352825 | 5,801609353 | 2,79011E-16 | 2,68347E-15 |
| NOB1     | 0,802663188  | 6,173909507 | 2,84193E-16 | 2,72945E-15 |
| SESTD1   | -0,925326276 | 6,347680894 | 2,87448E-16 | 2,75683E-15 |
| USP54    | -1,018079691 | 6,637777101 | 2,88787E-16 | 2,76578E-15 |
| EIF2C4   | -0,774012239 | 4,833180756 | 2,89779E-16 | 2,77139E-15 |
| DCAF12   | 0,877362411  | 7,105297432 | 2,98354E-16 | 2,8494E-15  |
| CKAP4    | 1,086127791  | 7,594415256 | 3,13741E-16 | 2,99217E-15 |
| EFEMP1   | -1,459042614 | 7,979662341 | 3,17653E-16 | 3,02525E-15 |
| TRIM27   | 0,650418321  | 6,726257218 | 3,18548E-16 | 3,02954E-15 |
| NR2C2AP  | 0,952921577  | 4,715281129 | 3,23584E-16 | 3,07315E-15 |
| TMEM164  | -0,982026956 | 6,127273733 | 3,44048E-16 | 3,26296E-15 |
| EARS2    | 0,696442397  | 5,321756392 | 3,45501E-16 | 3,27218E-15 |
| RANBP1   | 0,96740734   | 6,396935028 | 3,69043E-16 | 3,4903E-15  |
| SMYD4    | -0,582010145 | 4,42948223  | 3,75267E-16 | 3,54424E-15 |
| THY1     | 1,786008742  | 7,107865723 | 4,05779E-16 | 3,82712E-15 |
| WDR76    | 0,961777554  | 3,890828494 | 4,2161E-16  | 3,97094E-15 |
| CARD16   | -1,226618348 | 4,340210781 | 4,37143E-16 | 4,11155E-15 |
| KIAA1109 | -0,981519631 | 6,442232845 | 4,46486E-16 | 4,19365E-15 |
| RYBP     | -0,696856892 | 6,409360573 | 4,64583E-16 | 4,35762E-15 |
| ETS2     | -1,14345754  | 8,152645805 | 4,97224E-16 | 4,65738E-15 |
| HYOU1    | 1,056568015  | 8,452343586 | 5,04994E-16 | 4,72367E-15 |
| MPZL1    | 0,625708008  | 7,935265851 | 5,18557E-16 | 4,84389E-15 |
| SLC35F5  | 0,932247418  | 6,432870287 | 5,20383E-16 | 4,8543E-15  |
| GLRX3    | 1,091926065  | 6,545340202 | 5,41169E-16 | 5,0413E-15  |
| HEATR2   | 0,881794595  | 5,867672552 | 5,48166E-16 | 5,09951E-15 |
| ZNF485   | 0,838036301  | 2,410627176 | 5,53009E-16 | 5,13756E-15 |
| CXorf40B | 0,685996276  | 4,784112096 | 5,74782E-16 | 5,33112E-15 |
| BCS1L    | 0,644523826  | 4,465898688 | 5,75408E-16 | 5,33112E-15 |
| KDM6B    | -1,163438905 | 6,429490622 | 5,80006E-16 | 5,36644E-15 |
| DNTTIP1  | 1,923812514  | 6,742515791 | 6,23756E-16 | 5,76341E-15 |
| TMED9    | 0,750718744  | 8,329049391 | 6,397E-16   | 5,90273E-15 |
| RPS6KB2  | 0,751157792  | 6,15197633  | 6,61208E-16 | 6,09295E-15 |
| ZNF217   | 1,303224891  | 6,852956757 | 6,65086E-16 | 6,12041E-15 |
| POLDIP2  | 0,641678272  | 7,330098008 | 7,00185E-16 | 6,43472E-15 |
| ZDHHC9   | 1,249483178  | 7,823496627 | 7,23522E-16 | 6,64024E-15 |
| NISCH    | -0,816239436 | 6,656998422 | 7,37098E-16 | 6,75574E-15 |
| NPR3     | -1,549456528 | 3,02597658  | 7,81724E-16 | 7,15513E-15 |

|          |              |             |             |             |
|----------|--------------|-------------|-------------|-------------|
| RCN3     | 1,767488534  | 5,570628514 | 8,49678E-16 | 7,76669E-15 |
| GTF2H4   | 0,704176382  | 4,946516748 | 9,02604E-16 | 8,23943E-15 |
| MARS     | 0,823792489  | 7,235434695 | 9,13834E-16 | 8,33079E-15 |
| STAT5A   | -0,756565983 | 5,853134451 | 9,21658E-16 | 8,39091E-15 |
| APOA1BP  | 1,160292287  | 7,417421533 | 9,25502E-16 | 8,41467E-15 |
| MTHFR    | -0,825393476 | 6,009525997 | 9,29038E-16 | 8,43557E-15 |
| TSSC1    | 0,817988187  | 5,326938539 | 9,62664E-16 | 8,72926E-15 |
| TLN1     | -0,881942857 | 9,244063305 | 9,73754E-16 | 8,8181E-15  |
| MDH2     | 0,757886547  | 7,962632167 | 9,99839E-16 | 9,04231E-15 |
| BTG2     | -1,324774701 | 8,016324347 | 1,00734E-15 | 9,09806E-15 |
| STARD7   | -0,578044738 | 8,099398848 | 1,0492E-15  | 9,46365E-15 |
| FOXO1    | -1,002905567 | 5,602743313 | 1,12754E-15 | 1,01568E-14 |
| MTBP     | 1,132831014  | 2,84584902  | 1,16502E-15 | 1,04806E-14 |
| TRPT1    | 0,836633156  | 4,723065525 | 1,16996E-15 | 1,05111E-14 |
| GNAI2    | -0,702191471 | 8,998925638 | 1,31541E-15 | 1,18024E-14 |
| MRPS24   | 1,137771837  | 6,532684734 | 1,3537E-15  | 1,21299E-14 |
| KDM5B    | 0,907406861  | 7,113149862 | 1,36454E-15 | 1,2211E-14  |
| SLC9A3R2 | -1,086682513 | 7,458290157 | 1,4109E-15  | 1,26093E-14 |
| ZZEF1    | -0,862416608 | 6,249261054 | 1,45254E-15 | 1,29645E-14 |
| EGLN2    | -0,657403876 | 6,989605191 | 1,46442E-15 | 1,30535E-14 |
| MTIF2    | 0,601487783  | 5,588408196 | 1,48254E-15 | 1,31977E-14 |
| SMARCA5  | -0,603154668 | 7,26286463  | 1,53921E-15 | 1,36843E-14 |
| DCUN1D5  | 0,914202888  | 5,04116776  | 1,61624E-15 | 1,43504E-14 |
| EIF4EBP1 | 2,087886611  | 6,130780027 | 1,62885E-15 | 1,44436E-14 |
| CASP6    | 0,864224226  | 5,135490354 | 1,65283E-15 | 1,46372E-14 |
| SNF8     | 0,700894042  | 6,300819112 | 1,66602E-15 | 1,47348E-14 |
| JAK2     | -0,896666504 | 4,900987888 | 1,73444E-15 | 1,53201E-14 |
| DSG2     | 1,383763856  | 8,134635206 | 1,77912E-15 | 1,56945E-14 |
| METAP1   | 0,649150586  | 6,342490054 | 1,79145E-15 | 1,57828E-14 |
| POLR1C   | 0,789021939  | 5,142003738 | 1,82185E-15 | 1,60299E-14 |
| ZC3H8    | 0,9316264    | 2,991350812 | 1,83794E-15 | 1,61507E-14 |
| CLCN2    | 1,08090232   | 2,976549704 | 1,92032E-15 | 1,68528E-14 |
| DSN1     | 0,933682869  | 4,877030706 | 1,99046E-15 | 1,74459E-14 |
| TBL2     | 0,782234869  | 6,400822638 | 2,05554E-15 | 1,79932E-14 |
| MRPS23   | 1,12405497   | 6,431534179 | 2,13582E-15 | 1,8672E-14  |
| NOTCH1   | -1,123324398 | 6,424116917 | 2,14709E-15 | 1,87464E-14 |
| PPP6C    | -0,467817727 | 6,694558705 | 2,17474E-15 | 1,8955E-14  |
| WDR47    | -0,692552265 | 4,502633759 | 2,17653E-15 | 1,8955E-14  |
| RAVER2   | -0,938317816 | 4,578025687 | 2,27549E-15 | 1,97915E-14 |
| UCK2     | 1,835303263  | 4,362692367 | 2,32876E-15 | 2,02291E-14 |
| KIAA1009 | -0,810609225 | 3,497946625 | 2,44685E-15 | 2,12279E-14 |
| SLBP     | 0,749338289  | 6,265494166 | 2,4549E-15  | 2,1249E-14  |
| KCNAB2   | -1,083810991 | 5,373784146 | 2,45552E-15 | 2,1249E-14  |
| MCM7     | 1,131330902  | 7,122718102 | 2,59129E-15 | 2,23941E-14 |
| ACOT11   | 1,236512207  | 3,804301292 | 2,59442E-15 | 2,23941E-14 |
| TCF3     | 0,852608283  | 6,498565707 | 2,78039E-15 | 2,3969E-14  |
| RBMS3    | -1,356914168 | 2,78787403  | 2,80749E-15 | 2,41721E-14 |
| NAPIL5   | -1,022356863 | 2,66844422  | 2,84114E-15 | 2,44309E-14 |
| CDK4     | 1,309720333  | 7,689923064 | 2,92059E-15 | 2,50825E-14 |
| EGR1     | -1,665296899 | 8,921933808 | 3,0515E-15  | 2,61424E-14 |

|           |              |             |             |             |
|-----------|--------------|-------------|-------------|-------------|
| SKI       | -0,804565482 | 7,264038128 | 3,05167E-15 | 2,61424E-14 |
| FOXO3     | -0,922133418 | 6,837081153 | 3,05723E-15 | 2,61572E-14 |
| COPB2     | 0,602196108  | 8,009710555 | 3,22962E-15 | 2,75962E-14 |
| SORT1     | -0,958389914 | 7,824060423 | 3,23352E-15 | 2,75962E-14 |
| FANCD2    | 0,858087239  | 4,429515778 | 3,29088E-15 | 2,80506E-14 |
| SEC61A1   | 0,651979439  | 9,237619224 | 3,35781E-15 | 2,85854E-14 |
| DBN1      | 1,195789583  | 7,033115993 | 3,57702E-15 | 3,04136E-14 |
| MAD2L2    | 1,195236267  | 5,390676116 | 3,63934E-15 | 3,0905E-14  |
| PUS1      | 0,940306981  | 4,648950788 | 3,83406E-15 | 3,2518E-14  |
| AMOTL2    | -0,99227608  | 6,834819494 | 3,84441E-15 | 3,25652E-14 |
| POLR1B    | 0,602312611  | 5,292844963 | 3,85591E-15 | 3,26222E-14 |
| HIST1H2BK | 1,330832002  | 6,743449099 | 3,92792E-15 | 3,31902E-14 |
| ALOX5AP   | -1,51935162  | 6,704683511 | 3,96988E-15 | 3,35032E-14 |
| RFC2      | 0,809445808  | 5,610484811 | 4,03318E-15 | 3,39954E-14 |
| TSEN54    | 0,670816569  | 5,400142579 | 4,07532E-15 | 3,43082E-14 |
| DUSP18    | -0,847318716 | 3,849108786 | 4,13425E-15 | 3,47613E-14 |
| SLAIN2    | -0,500481941 | 6,565976166 | 4,15745E-15 | 3,49134E-14 |
| PRPF19    | 0,672920621  | 7,300193311 | 4,22761E-15 | 3,54589E-14 |
| TBC1D17   | -0,638703708 | 5,756972012 | 4,33417E-15 | 3,6308E-14  |
| ZRANB1    | -0,576167215 | 5,783558358 | 4,38167E-15 | 3,66609E-14 |
| TBCEL     | -0,799891334 | 4,732438205 | 4,5455E-15  | 3,7985E-14  |
| DCTPP1    | 1,21903997   | 6,04356526  | 4,56677E-15 | 3,8116E-14  |
| ISG20L2   | 0,643640197  | 5,685965125 | 4,65946E-15 | 3,88421E-14 |
| SOX12     | 1,243532543  | 5,350733591 | 4,80504E-15 | 4,00068E-14 |
| NSF       | 0,866452602  | 6,873875779 | 5,14725E-15 | 4,28038E-14 |
| XPOT      | 1,055930619  | 7,059757942 | 5,24915E-15 | 4,3598E-14  |
| FASTKD3   | 0,985397459  | 4,011424773 | 5,32814E-15 | 4,42002E-14 |
| DOCK9     | -1,137523435 | 7,179797649 | 5,49403E-15 | 4,5521E-14  |
| SAC3D1    | 1,032146542  | 3,797418297 | 5,52772E-15 | 4,57446E-14 |
| PDS5B     | -0,60352766  | 5,568161323 | 5,56276E-15 | 4,59787E-14 |
| KDELR1    | 0,62014916   | 8,287624115 | 5,99905E-15 | 4,95248E-14 |
| CCT6A     | 1,04317238   | 8,170630597 | 6,06103E-15 | 4,9976E-14  |
| PTK2B     | -0,896657447 | 6,255868972 | 6,26394E-15 | 5,15867E-14 |
| RABEP1    | -0,541399458 | 6,12723871  | 6,55629E-15 | 5,39292E-14 |
| MEA1      | 0,73985      | 6,461872351 | 6,70253E-15 | 5,50658E-14 |
| MRPL30    | 0,690760312  | 5,89768463  | 6,91319E-15 | 5,67281E-14 |
| ZMIZ1     | -0,867253909 | 7,267976458 | 7,094E-15   | 5,81418E-14 |
| CEP72     | 1,269180135  | 3,036726884 | 7,3686E-15  | 6,03199E-14 |
| SNTB2     | -0,680689788 | 5,785465601 | 7,66278E-15 | 6,26529E-14 |
| UGDH      | 1,515058945  | 7,449210734 | 8,10674E-15 | 6,62034E-14 |
| CASP3     | 0,769152053  | 5,739900585 | 8,44575E-15 | 6,88894E-14 |
| EHD1      | -0,874023648 | 7,07031564  | 8,8217E-15  | 7,187E-14   |
| RARS      | 0,582920786  | 6,380151997 | 9,03948E-15 | 7,35563E-14 |
| PRMT5     | 0,710469646  | 6,496400124 | 9,38954E-15 | 7,63138E-14 |
| TMED2     | 0,925452735  | 9,25323901  | 9,50085E-15 | 7,71265E-14 |
| PSMC4     | 0,893009788  | 7,012277305 | 9,52997E-15 | 7,7271E-14  |
| PJA2      | -0,634696531 | 7,608975096 | 9,65282E-15 | 7,8174E-14  |
| IER5L     | 1,676820673  | 4,443951165 | 9,82454E-15 | 7,94704E-14 |
| PLOD1     | 0,969242567  | 7,889028152 | 9,88362E-15 | 7,98535E-14 |
| CYP20A1   | -0,516506074 | 6,224373042 | 9,90237E-15 | 7,99104E-14 |

|          |              |             |             |             |
|----------|--------------|-------------|-------------|-------------|
| HARBI1   | 0,691182343  | 2,512112278 | 1,02266E-14 | 8,24295E-14 |
| FUBP1    | 0,606775055  | 6,694239733 | 1,03136E-14 | 8,30328E-14 |
| FOXP1    | -0,786667092 | 6,73046885  | 1,05281E-14 | 8,46592E-14 |
| LOXL2    | 2,11886069   | 6,311822547 | 1,08183E-14 | 8,68908E-14 |
| ICT1     | 0,984675978  | 5,188935639 | 1,20677E-14 | 9,68113E-14 |
| PMAIP1   | 2,029642091  | 5,006378014 | 1,22832E-14 | 9,8424E-14  |
| CABLES1  | -1,26349368  | 5,784639798 | 1,26439E-14 | 1,01196E-13 |
| VPS13D   | -0,929710723 | 6,675533395 | 1,32175E-14 | 1,05663E-13 |
| LRRC16A  | -0,805462618 | 5,592347659 | 1,34111E-14 | 1,07085E-13 |
| TBRG1    | -0,566946127 | 5,867201665 | 1,383E-14   | 1,10301E-13 |
| TCF4     | -1,13246654  | 6,61277933  | 1,39603E-14 | 1,1121E-13  |
| MOAP1    | -0,747551773 | 5,744094484 | 1,41153E-14 | 1,12313E-13 |
| SLC39A4  | 1,256443042  | 5,950998309 | 1,47528E-14 | 1,17248E-13 |
| ZNF92    | 0,866807168  | 4,067690428 | 1,51882E-14 | 1,20569E-13 |
| CYC1     | 1,189130709  | 7,334499455 | 1,52222E-14 | 1,20698E-13 |
| LIG3     | 0,812072594  | 5,328280641 | 1,65069E-14 | 1,30732E-13 |
| NES      | -1,534365884 | 6,682803931 | 1,65957E-14 | 1,31283E-13 |
| KLC1     | -0,617012243 | 6,661471864 | 1,66369E-14 | 1,31456E-13 |
| ZBTB41   | 0,695462123  | 5,681459849 | 1,69736E-14 | 1,33962E-13 |
| MTHFD1L  | 0,775053071  | 5,360492975 | 1,71127E-14 | 1,34904E-13 |
| SLC1A4   | 1,073833848  | 5,854180312 | 1,78264E-14 | 1,40367E-13 |
| UBP1     | -0,525959597 | 6,609001863 | 1,78482E-14 | 1,40377E-13 |
| TMEM106C | 1,257368531  | 6,876983545 | 1,83195E-14 | 1,43918E-13 |
| YIF1A    | 0,886255628  | 6,762474099 | 1,92853E-14 | 1,51331E-13 |
| BZW1     | 0,842825652  | 9,012654755 | 1,95267E-14 | 1,53049E-13 |
| SLC16A3  | 1,423011421  | 7,827116333 | 1,97503E-14 | 1,54624E-13 |
| C11orf83 | 1,198017692  | 4,801582833 | 2,16017E-14 | 1,68924E-13 |
| TOMM40   | 0,869491521  | 6,486931328 | 2,16986E-14 | 1,69487E-13 |
| RCN1     | 0,810698703  | 7,873173633 | 2,29324E-14 | 1,7892E-13  |
| RUNX2    | 1,435108117  | 4,378713279 | 2,4288E-14  | 1,8928E-13  |
| CLDN4    | 1,198267268  | 9,142662492 | 2,48691E-14 | 1,93587E-13 |
| ERGIC2   | 0,885134222  | 6,079797955 | 2,52296E-14 | 1,96169E-13 |
| UNC13B   | -1,180883697 | 7,520296312 | 2,58725E-14 | 2,00939E-13 |
| METTL2A  | 0,644648423  | 5,292765221 | 2,66173E-14 | 2,06488E-13 |
| TMEM106B | 0,967045055  | 7,325988048 | 2,78526E-14 | 2,15826E-13 |
| PDF      | 0,66991624   | 3,163453834 | 2,978E-14   | 2,30499E-13 |
| NUDT5    | 0,803625788  | 5,935087532 | 3,03345E-14 | 2,34525E-13 |
| DNMT3A   | 1,022155815  | 5,502384148 | 3,06706E-14 | 2,36855E-13 |
| TBC1D20  | -0,530908326 | 6,197741935 | 3,08332E-14 | 2,37841E-13 |
| EMILIN2  | -1,09141504  | 5,801888552 | 3,15462E-14 | 2,43066E-13 |
| JUNB     | -1,026086342 | 8,203731003 | 3,17422E-14 | 2,443E-13   |
| CAMTA2   | -0,677403494 | 6,079461533 | 3,17987E-14 | 2,44459E-13 |
| CD276    | 0,775779148  | 7,231626619 | 3,23991E-14 | 2,48795E-13 |
| COL13A1  | -1,43284905  | 3,297153527 | 3,29844E-14 | 2,53004E-13 |
| SURF4    | 0,581346947  | 8,892131477 | 3,33867E-14 | 2,55802E-13 |
| MINK1    | -0,759263469 | 7,097946395 | 3,34384E-14 | 2,55911E-13 |
| RNASEH1  | 0,672602612  | 4,423719853 | 3,43276E-14 | 2,62422E-13 |
| LOXL1    | 1,389055894  | 5,167446794 | 3,55543E-14 | 2,71439E-13 |
| FAM114A1 | 0,85907081   | 5,692766984 | 3,55868E-14 | 2,71439E-13 |
| CD81     | -0,790089503 | 9,732717911 | 3,59685E-14 | 2,74044E-13 |

|          |              |             |             |             |
|----------|--------------|-------------|-------------|-------------|
| SGCB     | -0,84324975  | 5,816105503 | 3,60766E-14 | 2,74561E-13 |
| POP7     | 1,03034785   | 5,249851059 | 3,65225E-14 | 2,77644E-13 |
| GPX8     | 1,287808318  | 5,459877267 | 3,84382E-14 | 2,91882E-13 |
| MPP5     | -0,646890726 | 5,980621607 | 3,85568E-14 | 2,92457E-13 |
| TUBA1C   | 0,985136108  | 8,964274934 | 3,95288E-14 | 2,99497E-13 |
| GSS      | 0,684941947  | 6,17339258  | 4,17572E-14 | 3,16029E-13 |
| COIL     | 0,550861514  | 5,13112986  | 4,22998E-14 | 3,19781E-13 |
| CHD1L    | 0,825506918  | 6,288348837 | 4,34916E-14 | 3,28426E-13 |
| TTF2     | 0,772161664  | 4,514258571 | 4,55968E-14 | 3,43943E-13 |
| ARID4A   | -0,783740917 | 5,208348279 | 4,67278E-14 | 3,52085E-13 |
| PTGIS    | -1,36572202  | 5,876267312 | 4,69081E-14 | 3,53053E-13 |
| VPS25    | 0,699379771  | 6,238530338 | 4,71512E-14 | 3,54492E-13 |
| GPX3     | -1,692198986 | 9,258393056 | 4,73382E-14 | 3,55394E-13 |
| TMEM87B  | 0,632037083  | 6,511348273 | 4,73754E-14 | 3,55394E-13 |
| RRP1     | 0,739557878  | 5,267485156 | 4,76242E-14 | 3,56867E-13 |
| MKNK2    | -0,763277404 | 7,999738326 | 4,78467E-14 | 3,58141E-13 |
| TSFM     | 1,061435494  | 5,608314575 | 5,17998E-14 | 3,87306E-13 |
| NFAT5    | -0,856631013 | 6,468945127 | 5,2999E-14  | 3,95838E-13 |
| ANKFY1   | -0,657595985 | 6,723725936 | 5,35129E-14 | 3,99239E-13 |
| SASS6    | 0,909587454  | 3,114798713 | 5,4296E-14  | 4,04639E-13 |
| PIAS3    | 0,803654729  | 6,210904576 | 5,54454E-14 | 4,12753E-13 |
| HNRNPL   | 0,381853335  | 8,666066967 | 5,59635E-14 | 4,15751E-13 |
| MRPS17   | 0,937956982  | 4,286057169 | 5,597E-14   | 4,15751E-13 |
| FRYL     | -0,692448087 | 6,137827468 | 5,66167E-14 | 4,20097E-13 |
| NPHP3    | -0,701409959 | 4,525987773 | 6,10954E-14 | 4,52837E-13 |
| SNRPA    | 0,590842668  | 6,075205938 | 6,81121E-14 | 5,04296E-13 |
| SLC39A7  | 0,768525257  | 8,10714937  | 6,9699E-14  | 5,15485E-13 |
| GTF2E2   | 0,745250367  | 5,455418138 | 7,0749E-14  | 5,22684E-13 |
| GEMIN6   | 1,033101797  | 3,977460311 | 7,16529E-14 | 5,28789E-13 |
| RNPS1    | 0,487255897  | 7,539021868 | 7,19748E-14 | 5,30294E-13 |
| CCT7     | 0,620860172  | 8,265180704 | 7,20124E-14 | 5,30294E-13 |
| LRRC42   | 0,789029094  | 5,49764247  | 7,22421E-14 | 5,31382E-13 |
| OSTC     | 1,073753254  | 7,318514457 | 7,2316E-14  | 5,31382E-13 |
| FBXW4    | -0,803613895 | 6,359721031 | 7,59152E-14 | 5,57066E-13 |
| MEMO1    | 0,832571591  | 5,667423297 | 7,59747E-14 | 5,57066E-13 |
| SLC25A30 | -0,635634381 | 4,821278466 | 7,62718E-14 | 5,58644E-13 |
| UQCRH    | 0,962021418  | 7,262231655 | 7,82315E-14 | 5,72382E-13 |
| C10orf35 | 0,99296207   | 4,001890606 | 7,89923E-14 | 5,7733E-13  |
| SOCS3    | -1,391946651 | 8,305904431 | 8,06022E-14 | 5,8838E-13  |
| SAMHD1   | -1,10275397  | 6,881962636 | 8,06768E-14 | 5,8838E-13  |
| ANKRD12  | -0,725117705 | 6,015886371 | 8,17302E-14 | 5,95426E-13 |
| FBXL6    | 0,925467061  | 4,828655054 | 8,23954E-14 | 5,99631E-13 |
| CCDC58   | 1,033802408  | 4,222594271 | 8,29874E-14 | 6,03295E-13 |
| MTCH2    | 0,623784796  | 6,793989248 | 8,40699E-14 | 6,10514E-13 |
| DNAJB11  | 0,794016497  | 6,712923125 | 8,52708E-14 | 6,18576E-13 |
| FOS      | -1,616837947 | 9,162966295 | 8,5682E-14  | 6,20899E-13 |
| ITPKC    | -1,201818713 | 6,90890999  | 8,63638E-14 | 6,25175E-13 |
| PPP2R5A  | -0,82589663  | 7,251260591 | 8,99099E-14 | 6,50154E-13 |
| MED8     | 0,601602281  | 5,885820453 | 9,07136E-14 | 6,54894E-13 |
| ADAMTS12 | 1,796605428  | 3,736431143 | 9,07574E-14 | 6,54894E-13 |

|          |              |             |             |             |
|----------|--------------|-------------|-------------|-------------|
| LEPRE1   | 0,811528985  | 5,816560125 | 9,10202E-14 | 6,56096E-13 |
| ARHGAP23 | -1,106941529 | 6,169325935 | 9,33446E-14 | 6,7214E-13  |
| DDX41    | 0,602017789  | 6,473111514 | 9,55E-14    | 6,86935E-13 |
| CORO1C   | -0,75302301  | 7,947046524 | 9,78348E-14 | 7,02274E-13 |
| DYNC2H1  | -1,403841267 | 4,46398009  | 9,78384E-14 | 7,02274E-13 |
| HSP90B1  | 0,817361428  | 10,35815791 | 9,87089E-14 | 7,07777E-13 |
| NDUFS6   | 1,01656463   | 6,423787424 | 1,01836E-13 | 7,29429E-13 |
| TH1L     | 0,730132036  | 6,622953047 | 1,03548E-13 | 7,40917E-13 |
| PAK1IP1  | 0,842851392  | 4,933911664 | 1,05013E-13 | 7,50611E-13 |
| TFAM     | 0,730414213  | 5,42660643  | 1,06365E-13 | 7,59481E-13 |
| WASF2    | -0,679535169 | 7,882095708 | 1,08534E-13 | 7,74154E-13 |
| ADAM15   | 1,079489666  | 8,210799103 | 1,09825E-13 | 7,82549E-13 |
| TTC7B    | -0,896335029 | 4,553519557 | 1,10575E-13 | 7,87068E-13 |
| DAB2     | -1,041862534 | 6,95813246  | 1,11119E-13 | 7,90114E-13 |
| DENR     | 0,577604987  | 6,694336672 | 1,11618E-13 | 7,92835E-13 |
| AMZ2     | 0,673203644  | 6,532945344 | 1,13265E-13 | 8,037E-13   |
| HDAC7    | -0,644424191 | 6,98878826  | 1,14841E-13 | 8,14037E-13 |
| CD33     | -1,173071163 | 3,703847505 | 1,15801E-13 | 8,19985E-13 |
| PFDN2    | 1,009786232  | 6,192266184 | 1,2361E-13  | 8,74377E-13 |
| LPGAT1   | 0,847796254  | 7,003612662 | 1,28139E-13 | 9,05474E-13 |
| LTA4H    | -0,889415222 | 8,441273739 | 1,29577E-13 | 9,14681E-13 |
| TOR3A    | 0,722368633  | 6,537222912 | 1,33193E-13 | 9,39235E-13 |
| NHP2     | 0,893007365  | 6,580904146 | 1,34836E-13 | 9,49843E-13 |
| EIF4EBP2 | -0,508622782 | 7,928289245 | 1,39994E-13 | 9,85156E-13 |
| RASSF8   | -1,331880539 | 5,610664144 | 1,40249E-13 | 9,85938E-13 |
| EIF3I    | 0,721191122  | 8,19440289  | 1,42841E-13 | 1,00313E-12 |
| SLCO3A1  | -0,977256405 | 5,904622106 | 1,43735E-13 | 1,00836E-12 |
| HOMER3   | 0,972442105  | 5,373819927 | 1,44804E-13 | 1,01482E-12 |
| GPN1     | 0,872362944  | 6,271137242 | 1,46867E-13 | 1,02822E-12 |
| NIF3L1   | 0,738529412  | 5,144930051 | 1,49235E-13 | 1,04358E-12 |
| PABPC3   | 0,989505458  | 2,319169148 | 1,49368E-13 | 1,04358E-12 |
| E2F5     | 1,055511311  | 4,212206664 | 1,50017E-13 | 1,04704E-12 |
| PHB      | 0,675397326  | 7,74864039  | 1,50674E-13 | 1,05056E-12 |
| PSMD3    | 0,794635753  | 7,751865524 | 1,53666E-13 | 1,07033E-12 |
| SEPP1    | -1,38877682  | 9,158721337 | 1,56949E-13 | 1,09208E-12 |
| EID1     | -0,59707636  | 7,764486071 | 1,57736E-13 | 1,09644E-12 |
| FAM98A   | 0,562582442  | 5,789841025 | 1,60762E-13 | 1,11633E-12 |
| ARHGEF2  | -0,744317851 | 7,301573599 | 1,61038E-13 | 1,11711E-12 |
| PGK1     | 1,082082087  | 9,951399819 | 1,65343E-13 | 1,14581E-12 |
| EBNA1BP2 | 0,678291322  | 6,362717784 | 1,67782E-13 | 1,16153E-12 |
| MRPS10   | 0,835190593  | 6,425037119 | 1,78421E-13 | 1,23393E-12 |
| RNF125   | -0,753768831 | 4,383825017 | 1,80096E-13 | 1,24314E-12 |
| LSM2     | 1,072721799  | 5,969439028 | 1,80118E-13 | 1,24314E-12 |
| GPS1     | 0,612054539  | 7,160238136 | 1,8034E-13  | 1,24342E-12 |
| C2       | -1,231298126 | 7,90006191  | 1,83044E-13 | 1,26078E-12 |
| DCPS     | 0,692291863  | 4,67014695  | 1,88241E-13 | 1,29527E-12 |
| PQLC1    | -0,609470017 | 6,070755433 | 1,94445E-13 | 1,33661E-12 |
| VIM      | -1,031523093 | 10,74352152 | 2,04544E-13 | 1,40345E-12 |
| FBXL19   | 0,940489611  | 4,741614424 | 2,0458E-13  | 1,40345E-12 |
| FKBP4    | 1,192230645  | 7,327993616 | 2,06365E-13 | 1,41428E-12 |

|           |              |             |             |             |
|-----------|--------------|-------------|-------------|-------------|
| WDYHV1    | 0,964734638  | 4,121078545 | 2,11154E-13 | 1,44564E-12 |
| PSMB3     | 1,091758463  | 7,578528987 | 2,14257E-13 | 1,46541E-12 |
| PNRC2     | -0,524959256 | 7,276256414 | 2,1706E-13  | 1,4831E-12  |
| MMP14     | 1,38763302   | 8,773947015 | 2,38329E-13 | 1,62679E-12 |
| COBLL1    | -1,006384132 | 5,9117775   | 2,40178E-13 | 1,63778E-12 |
| GRN       | -0,726480715 | 10,01346702 | 2,42704E-13 | 1,65334E-12 |
| C1QA      | -1,303918218 | 8,715353846 | 2,43403E-13 | 1,65645E-12 |
| PAIP1     | 0,755814812  | 7,423499967 | 2,45228E-13 | 1,66721E-12 |
| C12orf23  | 0,86609907   | 6,720947898 | 2,54364E-13 | 1,7276E-12  |
| VSIG10    | -1,084081283 | 5,545282442 | 2,60748E-13 | 1,76919E-12 |
| UBE2G2    | -0,559145607 | 6,657820583 | 2,64962E-13 | 1,796E-12   |
| NELF      | 1,049305176  | 5,891891475 | 2,71983E-13 | 1,84176E-12 |
| FAM174A   | -0,700871896 | 4,995535169 | 2,74643E-13 | 1,85793E-12 |
| CREBL2    | -0,617309965 | 6,843065849 | 2,79702E-13 | 1,89028E-12 |
| VCAN      | 1,747451685  | 8,245346025 | 2,8118E-13  | 1,89838E-12 |
| C12orf49  | -0,907509848 | 6,537551951 | 2,88609E-13 | 1,94661E-12 |
| NET1      | 1,223183154  | 7,739821887 | 2,99558E-13 | 2,01846E-12 |
| C5orf43   | 0,607153885  | 6,595437823 | 3,07749E-13 | 2,07161E-12 |
| WWP2      | -0,736090543 | 6,788889218 | 3,10218E-13 | 2,08617E-12 |
| MDFI      | 1,569450184  | 4,835891105 | 3,10654E-13 | 2,08704E-12 |
| IL17RA    | -0,663089342 | 4,765992024 | 3,1218E-13  | 2,09523E-12 |
| CDH24     | 1,38550057   | 3,795700995 | 3,15476E-13 | 2,11527E-12 |
| C17orf89  | 0,975896442  | 4,295916372 | 3,23727E-13 | 2,16846E-12 |
| TUBB      | 0,836263376  | 10,11870098 | 3,35149E-13 | 2,24277E-12 |
| ACSL4     | -0,917370624 | 7,533240932 | 3,41305E-13 | 2,28172E-12 |
| C11orf84  | 0,815481127  | 5,088501386 | 3,54339E-13 | 2,36654E-12 |
| ARHGAP29  | -1,185400344 | 6,746067698 | 3,55528E-13 | 2,37216E-12 |
| PNPLA2    | -0,783413225 | 6,761711768 | 3,56143E-13 | 2,37394E-12 |
| RHOD      | 1,404205613  | 5,221353658 | 3,57725E-13 | 2,38215E-12 |
| NMRAL1    | 0,726906192  | 5,778625066 | 3,58815E-13 | 2,38709E-12 |
| GTF3C2    | 0,482036236  | 6,549353973 | 3,67713E-13 | 2,44389E-12 |
| C12orf52  | 0,658566711  | 5,044817114 | 3,71921E-13 | 2,46945E-12 |
| C11orf10  | 0,79744283   | 6,805531003 | 3,7586E-13  | 2,49318E-12 |
| CCNL1     | -0,861771053 | 6,321464896 | 3,79538E-13 | 2,51513E-12 |
| CRELD2    | 0,955145814  | 5,988399472 | 3,81415E-13 | 2,52512E-12 |
| WASF1     | 1,358668872  | 3,405112035 | 3,82775E-13 | 2,53166E-12 |
| BOLA3     | 1,114915061  | 4,421448181 | 3,97689E-13 | 2,62775E-12 |
| SCNM1     | 0,840185519  | 5,400339384 | 3,99058E-13 | 2,63425E-12 |
| NOP16     | 1,051601025  | 4,564199861 | 4,05632E-13 | 2,67505E-12 |
| AKAP12    | -1,692446588 | 6,604700916 | 4,22946E-13 | 2,78405E-12 |
| RPN2      | 0,698434514  | 9,246167448 | 4,22976E-13 | 2,78405E-12 |
| ZNRD1     | 0,827256153  | 4,826093779 | 4,28188E-13 | 2,81563E-12 |
| SETX      | -0,655760542 | 6,877167789 | 4,41469E-13 | 2,90017E-12 |
| SCD       | -1,187445434 | 9,451604902 | 4,49059E-13 | 2,94719E-12 |
| ENOPH1    | 0,619406466  | 6,076188844 | 4,63869E-13 | 3,04147E-12 |
| ATF3      | -1,492698038 | 6,807578131 | 4,73685E-13 | 3,10284E-12 |
| SAR1B     | 0,968391356  | 5,650697493 | 4,75029E-13 | 3,10866E-12 |
| HIST1H2BC | 1,79245984   | 3,200012168 | 4,81838E-13 | 3,15019E-12 |
| MEN1      | 0,600170914  | 5,7051733   | 4,8616E-13  | 3,1754E-12  |
| TIMM17B   | 1,01824555   | 6,014207639 | 4,97247E-13 | 3,24471E-12 |

|          |              |             |             |             |
|----------|--------------|-------------|-------------|-------------|
| C1orf109 | 0,610314694  | 4,389217794 | 5,24371E-13 | 3,41844E-12 |
| ERGIC3   | 0,636410157  | 8,588960058 | 5,3094E-13  | 3,45795E-12 |
| CISD2    | 0,789302281  | 6,065701684 | 5,38291E-13 | 3,50249E-12 |
| CDYL     | 0,588134083  | 5,517562819 | 5,39239E-13 | 3,50531E-12 |
| WDR77    | 0,598738585  | 5,60313328  | 5,44772E-13 | 3,53791E-12 |
| NAA10    | 0,966005976  | 6,233290486 | 5,4937E-13  | 3,56437E-12 |
| PER1     | -1,261777706 | 7,409100271 | 5,54732E-13 | 3,59574E-12 |
| PPP4C    | 0,826347305  | 7,313409038 | 5,62995E-13 | 3,64583E-12 |
| SBDSP1   | -0,695994703 | 5,312625868 | 5,7449E-13  | 3,71674E-12 |
| NVL      | 0,535453105  | 5,158582054 | 5,8617E-13  | 3,78872E-12 |
| SNRPD1   | 0,925452762  | 6,028185137 | 5,94907E-13 | 3,84154E-12 |
| RSU1     | -0,478830955 | 6,909688625 | 6,02838E-13 | 3,88908E-12 |
| PRELP    | -1,375579664 | 7,355668735 | 6,05698E-13 | 3,90187E-12 |
| MSH2     | 0,927333508  | 5,75258725  | 6,05965E-13 | 3,90187E-12 |
| BNIP3    | 1,223728445  | 6,893242037 | 6,18202E-13 | 3,9769E-12  |
| HIPK1    | -0,751157911 | 6,981826844 | 6,42472E-13 | 4,12914E-12 |
| MRPL10   | 0,55717546   | 6,072403433 | 6,45818E-13 | 4,14604E-12 |
| RAN      | 0,994315015  | 8,542590236 | 6,46317E-13 | 4,14604E-12 |
| POSTN    | 1,777485423  | 8,362810961 | 6,50245E-13 | 4,16731E-12 |
| PSMB5    | 0,768515404  | 7,287426607 | 6,53465E-13 | 4,18402E-12 |
| POLA2    | 0,782092971  | 4,686724965 | 6,61401E-13 | 4,23086E-12 |
| S100A2   | 3,564822101  | 6,23180611  | 6,66193E-13 | 4,25752E-12 |
| C1orf122 | 0,823992766  | 5,546278413 | 6,72257E-13 | 4,29044E-12 |
| CNTROB   | -0,722578171 | 5,763742308 | 6,72602E-13 | 4,29044E-12 |
| NT5E     | 2,219346334  | 6,796582537 | 6,75781E-13 | 4,30668E-12 |
| RAE1     | 0,830829232  | 5,493005973 | 7,00976E-13 | 4,46307E-12 |
| GAS7     | -1,053310816 | 5,952226496 | 7,15809E-13 | 4,55189E-12 |
| PDIA3P   | 0,749644619  | 5,838613497 | 7,1626E-13  | 4,55189E-12 |
| CDK5     | 0,825948906  | 4,57316651  | 7,49527E-13 | 4,75887E-12 |
| MBNL1    | -0,644937168 | 8,106104115 | 7,64872E-13 | 4,85178E-12 |
| POLR3K   | 0,851750575  | 4,728298302 | 7,74729E-13 | 4,90973E-12 |
| ANKRD44  | -0,962741868 | 3,837293399 | 8,22003E-13 | 5,20449E-12 |
| CDKN1C   | -1,062236932 | 4,719404892 | 8,2541E-13  | 5,22121E-12 |
| DCP1A    | -0,522662601 | 5,605141395 | 8,81151E-13 | 5,56864E-12 |
| SEC61G   | 0,933570181  | 6,49858946  | 9,09734E-13 | 5,74396E-12 |
| CPD      | 1,454676436  | 8,7711557   | 9,39727E-13 | 5,92784E-12 |
| ARHGEF17 | -0,853633755 | 6,481229316 | 9,53735E-13 | 6,01065E-12 |
| CIRH1A   | 0,561528417  | 5,867760704 | 9,56673E-13 | 6,02359E-12 |
| TUBB6    | -1,025090806 | 6,880913734 | 9,71494E-13 | 6,11127E-12 |
| FKBP3    | 0,91213289   | 6,354301864 | 1,00025E-12 | 6,28636E-12 |
| H2AFZ    | 0,962683099  | 7,832391922 | 1,0209E-12  | 6,41025E-12 |
| HNRNPAB  | 0,70581454   | 7,531606255 | 1,03497E-12 | 6,4926E-12  |
| B3GALNT1 | -1,108213313 | 4,965809325 | 1,05246E-12 | 6,59626E-12 |
| XPC      | -0,705750258 | 5,911100179 | 1,0566E-12  | 6,6161E-12  |
| NCOA1    | -0,743103115 | 6,330700999 | 1,06778E-12 | 6,67997E-12 |
| PSMD7    | 0,600050273  | 7,019421319 | 1,073E-12   | 6,70647E-12 |
| MXRA5    | 1,775035354  | 7,420366083 | 1,07601E-12 | 6,71912E-12 |
| ZDHHC18  | 0,709979715  | 6,04255687  | 1,08586E-12 | 6,77443E-12 |
| APOL4    | -0,93673331  | 5,444382261 | 1,08853E-12 | 6,78492E-12 |
| PSMA5    | 0,84084106   | 7,143283703 | 1,12758E-12 | 7,02188E-12 |



|          |              |             |             |             |
|----------|--------------|-------------|-------------|-------------|
| NFE2L3   | 1,514641499  | 5,975972529 | 1,13053E-12 | 7,03384E-12 |
| SPINT2   | 0,995310446  | 9,579155747 | 1,15725E-12 | 7,19353E-12 |
| RPS2     | 0,8160553    | 10,77925175 | 1,17314E-12 | 7,28564E-12 |
| PSMB2    | 0,585820798  | 7,271318373 | 1,17951E-12 | 7,31857E-12 |
| DUSP1    | -1,329570356 | 9,301824095 | 1,22474E-12 | 7,59226E-12 |
| MORC2    | 0,627874601  | 5,941598744 | 1,23491E-12 | 7,64838E-12 |
| STAMPB   | 0,595183765  | 5,744732953 | 1,24011E-12 | 7,67357E-12 |
| NSUN2    | 0,848366297  | 6,904177142 | 1,25888E-12 | 7,78268E-12 |
| MCM3     | 0,777423163  | 6,897504213 | 1,27028E-12 | 7,84022E-12 |
| POLD2    | 0,723508486  | 6,861935269 | 1,27049E-12 | 7,84022E-12 |
| COL1A2   | 1,664389121  | 11,13656658 | 1,27751E-12 | 7,87646E-12 |
| C15orf23 | 1,196836724  | 4,500908574 | 1,30193E-12 | 8,01974E-12 |
| NOP56    | 0,730583405  | 6,870332849 | 1,33372E-12 | 8,20813E-12 |
| TIMM9    | 0,836016618  | 5,095201907 | 1,34428E-12 | 8,26569E-12 |
| MRPS33   | 1,004535162  | 5,612152907 | 1,3523E-12  | 8,30751E-12 |
| ABCF2    | 0,563750349  | 6,489403278 | 1,35832E-12 | 8,33699E-12 |
| RNF34    | 0,56662541   | 5,343646847 | 1,37207E-12 | 8,41379E-12 |
| SNRPB    | 0,917079705  | 7,857077746 | 1,41329E-12 | 8,65879E-12 |
| FAM60A   | 1,189652417  | 7,267459503 | 1,46584E-12 | 8,97268E-12 |
| UBQLN4   | 0,713563902  | 6,907360076 | 1,4798E-12  | 9,05002E-12 |
| PDXK     | -0,694196247 | 7,864372321 | 1,48647E-12 | 9,08262E-12 |
| FAM3C    | 1,428959192  | 7,8660886   | 1,54316E-12 | 9,4206E-12  |
| EIF4A3   | 0,685173471  | 6,978356985 | 1,55043E-12 | 9,45649E-12 |
| PGAP1    | -0,897793329 | 4,438084196 | 1,57057E-12 | 9,57078E-12 |
| NOC2L    | 0,693841058  | 6,953412235 | 1,61866E-12 | 9,85503E-12 |
| ACBD6    | 0,605911933  | 5,41706321  | 1,62165E-12 | 9,86444E-12 |
| FCHSD2   | -0,559520923 | 6,106811724 | 1,64353E-12 | 9,9886E-12  |
| JMJD1C   | -0,679170199 | 6,518222323 | 1,66198E-12 | 1,00917E-11 |
| ATG16L1  | 0,540135749  | 5,590715852 | 1,68168E-12 | 1,02023E-11 |
| ZC3HAV1L | 0,943813462  | 2,3235851   | 1,70918E-12 | 1,03599E-11 |
| RRM1     | 0,651108228  | 6,378805143 | 1,74398E-12 | 1,05614E-11 |
| FAM129B  | -0,718516989 | 9,110540766 | 1,76367E-12 | 1,06712E-11 |
| ZNF107   | 0,88857262   | 3,97922781  | 1,77273E-12 | 1,07165E-11 |
| BCKDK    | 0,73283499   | 6,422139347 | 1,79961E-12 | 1,08694E-11 |
| SAMD4A   | -1,089575    | 5,455009024 | 1,80844E-12 | 1,09131E-11 |
| STK10    | -0,777792182 | 6,086311657 | 1,82532E-12 | 1,10052E-11 |
| AKAP9    | -0,836154083 | 6,633345041 | 1,8646E-12  | 1,12321E-11 |
| TRIB3    | 1,450054893  | 5,670256277 | 1,88872E-12 | 1,13673E-11 |
| LYPLA1   | 1,225389795  | 7,587039432 | 1,93095E-12 | 1,16112E-11 |
| PDE3B    | -1,117690884 | 4,743116049 | 1,9681E-12  | 1,18242E-11 |
| JTB      | 0,825332904  | 7,860633159 | 2,04626E-12 | 1,22829E-11 |
| EIF3B    | 0,795195538  | 8,106873914 | 2,06776E-12 | 1,23924E-11 |
| NFATC3   | -0,762299959 | 5,944004873 | 2,06813E-12 | 1,23924E-11 |
| SKIV2L   | 0,555251949  | 6,195443631 | 2,21993E-12 | 1,32904E-11 |
| NAT10    | 0,586815422  | 6,285710635 | 2,22996E-12 | 1,33387E-11 |
| PRPF4    | 0,572609491  | 5,645900659 | 2,40132E-12 | 1,43511E-11 |
| MRPS16   | 0,617529573  | 6,935768326 | 2,41495E-12 | 1,44199E-11 |
| VAMP3    | -0,50142442  | 7,52806854  | 2,42239E-12 | 1,44517E-11 |
| DDX17    | -0,568068021 | 9,011010853 | 2,51179E-12 | 1,49719E-11 |
| ITPK1    | -0,735850648 | 6,603181082 | 2,53592E-12 | 1,51026E-11 |

|          |              |             |             |             |
|----------|--------------|-------------|-------------|-------------|
| RSL1D1   | 0,574180247  | 7,951399193 | 2,65841E-12 | 1,58182E-11 |
| NCKAP5L  | -0,674724161 | 5,380918637 | 2,69961E-12 | 1,60494E-11 |
| TCEB1    | 0,965141497  | 6,310187253 | 2,72825E-12 | 1,62055E-11 |
| HSP90AB1 | 0,600210449  | 10,80816013 | 2,73933E-12 | 1,62571E-11 |
| CORO1B   | 0,561086024  | 7,397154637 | 2,86671E-12 | 1,69984E-11 |
| SNHG1    | 1,290951173  | 5,317339644 | 2,93963E-12 | 1,74156E-11 |
| USP39    | 0,590854458  | 6,488418042 | 3,02089E-12 | 1,78815E-11 |
| ABCB6    | 1,183716368  | 5,874984704 | 3,17504E-12 | 1,87776E-11 |
| CCT4     | 0,716104045  | 8,002845269 | 3,25964E-12 | 1,92613E-11 |
| OTUD4    | -0,542629623 | 6,403621371 | 3,34842E-12 | 1,97687E-11 |
| CXCL16   | -0,925049408 | 7,980315965 | 3,4392E-12  | 2,02871E-11 |
| KIAA0754 | -1,176690648 | 3,565789158 | 3,46941E-12 | 2,04476E-11 |
| KDSR     | -0,502338035 | 6,62093271  | 3,51266E-12 | 2,06846E-11 |
| CAPRIN1  | 0,427624846  | 8,499617103 | 3,55977E-12 | 2,0944E-11  |
| MLST8    | 0,562960697  | 5,732323411 | 3,58624E-12 | 2,10815E-11 |
| SMARCB1  | 0,485387272  | 6,553473334 | 3,64216E-12 | 2,13797E-11 |
| NUP37    | 0,849727709  | 4,79651379  | 3,64323E-12 | 2,13797E-11 |
| KRTCAP3  | 1,687597765  | 6,021176997 | 3,71275E-12 | 2,17689E-11 |
| ZFP64    | 0,559101421  | 4,796447718 | 3,73171E-12 | 2,18613E-11 |
| NFKBIA   | -1,014773374 | 8,602166917 | 3,73717E-12 | 2,18745E-11 |
| MRPL19   | 0,504589897  | 6,224714937 | 3,79077E-12 | 2,21692E-11 |
| PPIB     | 0,909021083  | 9,358147198 | 3,82716E-12 | 2,23628E-11 |
| CYP4V2   | -0,72487871  | 5,832992381 | 3,84221E-12 | 2,24315E-11 |
| SSR1     | 0,56338005   | 8,297758167 | 3,95524E-12 | 2,30717E-11 |
| SHFM1    | 0,869777628  | 6,888574573 | 3,99271E-12 | 2,32703E-11 |
| PARVG    | -0,986740369 | 5,076098014 | 4,0238E-12  | 2,34315E-11 |
| DDX52    | 0,747962662  | 5,581141529 | 4,04921E-12 | 2,35594E-11 |
| TLE4     | -0,990572845 | 4,894789463 | 4,19983E-12 | 2,44009E-11 |
| UBE2O    | 0,700406333  | 5,846929891 | 4,20101E-12 | 2,44009E-11 |
| DPY30    | 0,874657315  | 5,81470222  | 4,2406E-12  | 2,46099E-11 |
| GALNT2   | 0,74874499   | 7,695891892 | 4,28896E-12 | 2,48694E-11 |
| DSP      | 1,814274563  | 8,637210957 | 4,36269E-12 | 2,52754E-11 |
| PKD2     | -0,755668996 | 5,603851637 | 4,55261E-12 | 2,63533E-11 |
| FEM1C    | -0,66107163  | 5,882589592 | 4,59665E-12 | 2,65857E-11 |
| DPY19L1  | 1,113387231  | 7,210870287 | 4,71027E-12 | 2,72197E-11 |
| C1orf56  | 0,757401386  | 4,247697223 | 4,73087E-12 | 2,73057E-11 |
| PSMA1    | 0,586116032  | 7,469607753 | 4,73314E-12 | 2,73057E-11 |
| P4HA1    | 0,917402643  | 7,275159011 | 4,74642E-12 | 2,73591E-11 |
| ISG15    | 1,771574656  | 7,021787903 | 4,89722E-12 | 2,82045E-11 |
| WBSCR22  | 0,718255447  | 6,881182818 | 5,05835E-12 | 2,91079E-11 |
| TOMM70A  | 0,551195366  | 6,822264818 | 5,10762E-12 | 2,93667E-11 |
| SSSCA1   | 0,710382841  | 4,794040277 | 5,15779E-12 | 2,96302E-11 |
| NDUFS8   | 0,866938599  | 6,643004334 | 5,19314E-12 | 2,98081E-11 |
| RPL37    | 0,899338935  | 10,06592067 | 5,21508E-12 | 2,99089E-11 |
| MAST2    | 0,681299399  | 6,017094141 | 5,47856E-12 | 3,13935E-11 |
| STARD4   | -1,013301301 | 4,00241681  | 5,56986E-12 | 3,18899E-11 |
| SEC13    | 0,614022191  | 7,315066177 | 5,68324E-12 | 3,25117E-11 |
| CIQB     | -1,301610011 | 9,074947619 | 5,6896E-12  | 3,25209E-11 |
| FAM21A   | -0,584470979 | 5,623379212 | 5,69821E-12 | 3,25428E-11 |
| PRELID1  | 0,778001169  | 7,269223988 | 5,82107E-12 | 3,32166E-11 |

|           |              |             |             |             |
|-----------|--------------|-------------|-------------|-------------|
| DLG5      | 0,935843494  | 6,329814654 | 5,9878E-12  | 3,41395E-11 |
| GALNT6    | 1,626563674  | 6,425220957 | 6,02096E-12 | 3,42998E-11 |
| PDIA3     | 0,779109726  | 9,893967678 | 6,13199E-12 | 3,49032E-11 |
| GOLGA5    | 0,480350865  | 6,574382014 | 6,16266E-12 | 3,50485E-11 |
| MCTS1     | 0,602663511  | 6,122720664 | 6,51371E-12 | 3,70142E-11 |
| HMGN1     | 0,692456755  | 8,128108213 | 6,85059E-12 | 3,88961E-11 |
| DHTKD1    | 0,7308945    | 5,936419934 | 7,0272E-12  | 3,98656E-11 |
| FAM162A   | 0,968080428  | 5,905895512 | 7,40596E-12 | 4,19794E-11 |
| GTPBP2    | 0,569262509  | 6,391624174 | 7,477E-12   | 4,23469E-11 |
| TMCO1     | 0,726683958  | 7,5117519   | 7,54748E-12 | 4,27106E-11 |
| SLCO2B1   | -1,183015597 | 7,544615474 | 7,78955E-12 | 4,40439E-11 |
| PUF60     | 0,637555237  | 7,676456649 | 8,08399E-12 | 4,56709E-11 |
| ITSN2     | -0,56933897  | 6,611923096 | 8,09238E-12 | 4,56804E-11 |
| AZI2      | -0,484828587 | 5,979682502 | 8,24139E-12 | 4,64791E-11 |
| AGR2      | 2,237067511  | 9,300125989 | 8,2475E-12  | 4,64791E-11 |
| XPO1      | 0,533100515  | 7,847685841 | 8,25984E-12 | 4,65102E-11 |
| PRCC      | 0,567173561  | 6,640668757 | 8,41451E-12 | 4,7342E-11  |
| NOMO1     | 0,630316332  | 7,088144558 | 8,5371E-12  | 4,79921E-11 |
| FH        | 0,609855556  | 6,448224144 | 8,94798E-12 | 5,02605E-11 |
| SAR1A     | -0,428284812 | 7,488221043 | 9,00574E-12 | 5,05433E-11 |
| VPS33A    | 0,522211507  | 5,734133844 | 9,01819E-12 | 5,05689E-11 |
| EFTUD2    | 0,542939633  | 7,274261515 | 9,02513E-12 | 5,05689E-11 |
| KIAA1377  | -1,133436203 | 3,991597482 | 9,47027E-12 | 5,30195E-11 |
| NUDCD1    | 0,862287572  | 5,286140416 | 9,63805E-12 | 5,39146E-11 |
| AIFM1     | 0,577307861  | 5,901941389 | 9,88166E-12 | 5,5232E-11  |
| KIAA0907  | 0,818745573  | 5,843171189 | 1,00371E-11 | 5,60547E-11 |
| PKD1      | -0,874142874 | 6,5440513   | 1,02784E-11 | 5,73555E-11 |
| TMEM170B  | -0,89209955  | 4,31049077  | 1,04364E-11 | 5,81895E-11 |
| ITM2B     | -0,694401863 | 10,0785098  | 1,05266E-11 | 5,86444E-11 |
| EXOSC1    | 0,633691514  | 5,018295625 | 1,07548E-11 | 5,9867E-11  |
| CDK17     | -0,549279887 | 5,593337501 | 1,08297E-11 | 6,02347E-11 |
| TAF1D     | 0,663752255  | 5,560716466 | 1,09231E-11 | 6,06795E-11 |
| MLLT4     | -0,796705212 | 7,510184972 | 1,09275E-11 | 6,06795E-11 |
| LRRFIP2   | -0,508365064 | 5,72979771  | 1,12835E-11 | 6,26057E-11 |
| TUBB2A    | 1,376017082  | 5,385644954 | 1,15651E-11 | 6,41158E-11 |
| GTF2IRD2B | -0,680264204 | 4,983955713 | 1,1621E-11  | 6,43731E-11 |
| TIMM10    | 0,861806233  | 5,018451263 | 1,17045E-11 | 6,47831E-11 |
| HAX1      | 0,866443678  | 7,155669907 | 1,19594E-11 | 6,61405E-11 |
| CSTF3     | 0,493586276  | 5,268352155 | 1,25443E-11 | 6,93188E-11 |
| ZC3H15    | 0,55791694   | 6,597458758 | 1,28507E-11 | 7,09545E-11 |
| NUDT9     | -0,472897211 | 5,423417883 | 1,30403E-11 | 7,19433E-11 |
| RASAL2    | -0,804508374 | 5,809153959 | 1,30595E-11 | 7,19703E-11 |
| TTBK2     | -0,881591961 | 2,696311487 | 1,30663E-11 | 7,19703E-11 |
| YARS2     | 0,841787322  | 4,679980236 | 1,32011E-11 | 7,26539E-11 |
| CCDC43    | 0,585679282  | 5,317577208 | 1,32766E-11 | 7,30107E-11 |
| PHF6      | 0,540364659  | 5,428517362 | 1,34703E-11 | 7,40162E-11 |
| NOP2      | 0,961108077  | 5,740845134 | 1,36386E-11 | 7,48808E-11 |
| PDCD5     | 1,000444736  | 6,114404126 | 1,38337E-11 | 7,58904E-11 |
| DGAT1     | 0,786677334  | 6,098777678 | 1,39065E-11 | 7,62286E-11 |
| MTA3      | 0,640412963  | 5,772338084 | 1,40214E-11 | 7,67968E-11 |

|           |              |             |             |             |
|-----------|--------------|-------------|-------------|-------------|
| WHSC2     | 0,51692197   | 5,428283807 | 1,42889E-11 | 7,81988E-11 |
| MRPL42    | 0,77016465   | 5,763182882 | 1,44055E-11 | 7,87738E-11 |
| PDCL3     | 0,636805222  | 5,25120762  | 1,54041E-11 | 8,41671E-11 |
| GJA1      | -1,248067326 | 7,799363183 | 1,59673E-11 | 8,71744E-11 |
| C1orf21   | -1,140961126 | 6,259315358 | 1,61997E-11 | 8,83727E-11 |
| RFC3      | 0,904461744  | 4,288394491 | 1,6226E-11  | 8,84455E-11 |
| TRAF2     | 0,7960779    | 5,066289111 | 1,64301E-11 | 8,94861E-11 |
| LY75      | -0,767322675 | 6,983826225 | 1,67066E-11 | 9,09199E-11 |
| ALG6      | 0,584316312  | 4,268053385 | 1,70326E-11 | 9,26197E-11 |
| ANP32E    | 1,061253026  | 7,24224212  | 1,72128E-11 | 9,35252E-11 |
| ABCE1     | 0,53259439   | 6,729296609 | 1,75151E-11 | 9,5092E-11  |
| YKT6      | 0,687080933  | 7,228288981 | 1,80512E-11 | 9,79247E-11 |
| RNF149    | -0,507421348 | 6,766263643 | 1,81609E-11 | 9,84414E-11 |
| SMS       | 0,850193012  | 7,144926473 | 1,86257E-11 | 1,00881E-10 |
| SLMO2     | 0,858816519  | 7,227547915 | 1,86682E-11 | 1,01031E-10 |
| PRIM1     | 0,987358442  | 3,747621452 | 1,87463E-11 | 1,01373E-10 |
| NAA25     | 0,631857414  | 5,163769039 | 1,88008E-11 | 1,01587E-10 |
| ARMC1     | 0,739355895  | 5,869122642 | 1,88848E-11 | 1,0196E-10  |
| STK4      | -0,530413092 | 6,264299993 | 1,91091E-11 | 1,0309E-10  |
| PIGC      | 0,658188275  | 5,747326601 | 1,91771E-11 | 1,03374E-10 |
| C14orf166 | 0,645074275  | 7,19686283  | 1,95979E-11 | 1,05559E-10 |
| SCAMP3    | 0,608267674  | 6,897962752 | 1,96962E-11 | 1,06005E-10 |
| SNRPG     | 1,176051627  | 6,59108664  | 1,99497E-11 | 1,07285E-10 |
| RRAGB     | -0,610064405 | 3,943498468 | 1,99822E-11 | 1,07375E-10 |
| MPHOSPH9  | 0,919677788  | 3,758678524 | 2,00565E-11 | 1,07689E-10 |
| AUP1      | 0,714518296  | 7,755986559 | 2,07311E-11 | 1,11224E-10 |
| HIST1H1C  | 1,493441556  | 5,951573711 | 2,11729E-11 | 1,13505E-10 |
| PTPN6     | -0,640952844 | 6,751080581 | 2,1309E-11  | 1,14145E-10 |
| RAP1A     | -0,578347376 | 6,896020201 | 2,16093E-11 | 1,15662E-10 |
| CARM1     | 0,504839319  | 6,220318011 | 2,16329E-11 | 1,15698E-10 |
| MGC72080  | 1,035497575  | 3,62076693  | 2,18033E-11 | 1,16518E-10 |
| WDR45L    | 0,687130717  | 7,547278237 | 2,19088E-11 | 1,1699E-10  |
| ACAD11    | -0,718535071 | 4,267254329 | 2,28074E-11 | 1,21693E-10 |
| ZNF44     | -0,583416841 | 3,960866216 | 2,34424E-11 | 1,24984E-10 |
| ZNHIT3    | 0,664388305  | 5,530080703 | 2,35262E-11 | 1,25332E-10 |
| CDK14     | -0,911803297 | 5,232125716 | 2,38679E-11 | 1,27053E-10 |
| CHAF1A    | 0,915096882  | 4,454613851 | 2,39844E-11 | 1,27574E-10 |
| CKS2      | 1,512759106  | 5,641896443 | 2,42637E-11 | 1,28891E-10 |
| LIPA      | -1,08628142  | 8,343633117 | 2,42698E-11 | 1,28891E-10 |
| MAZ       | 0,650787757  | 7,765566966 | 2,60776E-11 | 1,38329E-10 |
| DIAPH2    | -0,750617215 | 4,69513851  | 2,60875E-11 | 1,38329E-10 |
| GCSH      | 1,015490072  | 5,074788398 | 2,61796E-11 | 1,38709E-10 |
| CCT8      | 0,511233303  | 7,912585507 | 2,64541E-11 | 1,40055E-10 |
| MSH6      | 0,769473294  | 6,522857641 | 2,72523E-11 | 1,44169E-10 |
| FBXO22    | 0,67515936   | 4,987220971 | 2,74336E-11 | 1,45015E-10 |
| HDAC4     | -0,682651552 | 4,614226762 | 2,88347E-11 | 1,52304E-10 |
| KRT8      | 1,244079697  | 10,63741047 | 2,88844E-11 | 1,52448E-10 |
| LIG1      | 0,687313588  | 5,228141071 | 2,91195E-11 | 1,5357E-10  |
| APRT      | 0,886448039  | 7,133223083 | 2,91584E-11 | 1,53656E-10 |
| LMNB2     | 0,984047376  | 6,500181153 | 2,9326E-11  | 1,5442E-10  |

|           |              |             |             |             |
|-----------|--------------|-------------|-------------|-------------|
| NPM1      | 0,803023451  | 9,867914222 | 2,97266E-11 | 1,56409E-10 |
| ZDHHC3    | -0,684490216 | 7,191183122 | 3,06494E-11 | 1,6114E-10  |
| HNRPDL    | -0,394463432 | 7,847817846 | 3,14165E-11 | 1,65045E-10 |
| C4orf46   | 0,878939997  | 3,977636154 | 3,17976E-11 | 1,66919E-10 |
| GORAB     | 0,815564632  | 4,455612725 | 3,20594E-11 | 1,6813E-10  |
| COPA      | 0,624796092  | 8,822097438 | 3,20776E-11 | 1,6813E-10  |
| NFYA      | 0,654760435  | 5,946446536 | 3,21884E-11 | 1,68581E-10 |
| NOP58     | 0,556433437  | 6,434404616 | 3,24003E-11 | 1,69561E-10 |
| ELOVL6    | 1,764063639  | 4,514252846 | 3,3273E-11  | 1,73994E-10 |
| ARRDC2    | -0,783645693 | 6,036015779 | 3,33147E-11 | 1,74079E-10 |
| SHC1      | 0,8433904    | 8,048754531 | 3,4573E-11  | 1,80515E-10 |
| GNA11     | -0,719460392 | 5,236887161 | 3,46241E-11 | 1,80644E-10 |
| TXNIP     | -0,944732828 | 10,29198231 | 3,47415E-11 | 1,81118E-10 |
| YARS      | 0,529077407  | 7,28354822  | 3,48234E-11 | 1,81406E-10 |
| SDHC      | 0,666962675  | 7,548338085 | 3,50027E-11 | 1,82201E-10 |
| MRPL38    | 0,625062249  | 5,663712626 | 3,51965E-11 | 1,8307E-10  |
| SLC5A3    | 1,243054908  | 6,222507934 | 3,64085E-11 | 1,8923E-10  |
| RPS6KA2   | -1,018716916 | 7,502135488 | 3,67849E-11 | 1,9104E-10  |
| KPNB1     | 0,659458785  | 8,355702575 | 3,69326E-11 | 1,91662E-10 |
| USP25     | -0,612713376 | 6,228726027 | 3,7016E-11  | 1,91948E-10 |
| SNX30     | -1,178267274 | 6,946902798 | 3,70788E-11 | 1,92128E-10 |
| ABCA1     | -0,931737109 | 6,64774243  | 3,75386E-11 | 1,94363E-10 |
| SERPINE2  | 2,367502335  | 6,182716801 | 3,88992E-11 | 2,01255E-10 |
| UBL4A     | 0,715947153  | 6,55916313  | 3,93799E-11 | 2,03587E-10 |
| RNF11     | -0,53177562  | 7,285634087 | 3,9523E-11  | 2,04073E-10 |
| CENPN     | 0,867016599  | 4,784147921 | 3,95337E-11 | 2,04073E-10 |
| DCN       | -1,172507294 | 9,738806621 | 3,97026E-11 | 2,0479E-10  |
| RPAP3     | 0,499392853  | 5,236230175 | 3,99494E-11 | 2,05907E-10 |
| DYNC1LI2  | -0,53156877  | 7,543746463 | 4,10488E-11 | 2,11414E-10 |
| TMEM147   | 1,0041584    | 6,907975922 | 4,16325E-11 | 2,14258E-10 |
| FOXF2     | -1,214599765 | 3,731109058 | 4,38286E-11 | 2,2539E-10  |
| ATXN7L3   | 0,566679799  | 6,638160584 | 4,47139E-11 | 2,2977E-10  |
| YY1       | 0,470924686  | 6,6272037   | 4,49103E-11 | 2,30605E-10 |
| PPAPDC1B  | 1,217128036  | 6,146645055 | 4,5129E-11  | 2,31553E-10 |
| C11orf9   | -1,771184368 | 6,3818002   | 4,62028E-11 | 2,36885E-10 |
| TMEM2     | -0,889232542 | 7,425456141 | 4,64628E-11 | 2,38039E-10 |
| ENC1      | 1,020271033  | 6,805775848 | 4,73879E-11 | 2,42596E-10 |
| EED       | 0,634363334  | 4,745936256 | 4,77E-11    | 2,4401E-10  |
| NEK1      | -0,652487467 | 4,323181644 | 4,80373E-11 | 2,45552E-10 |
| C5orf22   | 0,652926964  | 5,619558523 | 4,80778E-11 | 2,45575E-10 |
| KIDINS220 | -0,664471196 | 7,090285457 | 4,96755E-11 | 2,53546E-10 |
| SEPHS2    | 0,870187261  | 7,220218423 | 4,99487E-11 | 2,54749E-10 |
| FARP1     | -0,742284145 | 7,281026345 | 5,04769E-11 | 2,57251E-10 |
| EDEM1     | -0,707799172 | 7,568746455 | 5,08779E-11 | 2,59101E-10 |
| DHX37     | 0,65634301   | 5,115555489 | 5,33692E-11 | 2,71586E-10 |
| PRKAR1A   | -0,538939317 | 9,015207786 | 5,42077E-11 | 2,75647E-10 |
| BAIAP2L1  | 0,913956244  | 6,818362125 | 5,51168E-11 | 2,80061E-10 |
| MRPS35    | 1,03235572   | 6,761804283 | 5,64213E-11 | 2,86476E-10 |
| RBL2      | -0,615207215 | 7,198678635 | 5,67199E-11 | 2,87777E-10 |
| CD2AP     | 0,752895822  | 7,460560041 | 5,90766E-11 | 2,99512E-10 |

|          |              |             |             |             |
|----------|--------------|-------------|-------------|-------------|
| LAMA4    | -0,997906038 | 6,75119118  | 5,92724E-11 | 3,00281E-10 |
| PTPN12   | -0,499412621 | 7,373900791 | 5,96477E-11 | 3,01958E-10 |
| RNF181   | 0,967453058  | 7,01090192  | 5,9734E-11  | 3,02171E-10 |
| MCL1     | -0,644693466 | 9,669690284 | 6,0549E-11  | 3,06066E-10 |
| SSBP1    | 0,701606822  | 6,431909384 | 6,06491E-11 | 3,06345E-10 |
| NPLOC4   | 0,494642631  | 7,689096884 | 6,17788E-11 | 3,1182E-10  |
| F8A1     | 0,707642634  | 4,544249274 | 6,18814E-11 | 3,12107E-10 |
| ING3     | -0,505609706 | 4,182852417 | 6,30664E-11 | 3,17849E-10 |
| TRMT2A   | 0,594129602  | 5,310534002 | 6,39594E-11 | 3,22112E-10 |
| GAPVD1   | -0,557318209 | 6,398163827 | 6,44713E-11 | 3,2445E-10  |
| SF3B14   | 0,664558133  | 6,46011153  | 6,46736E-11 | 3,25228E-10 |
| XYLT2    | 0,659593345  | 5,833671768 | 6,6439E-11  | 3,3386E-10  |
| RNF13    | -0,644731781 | 7,12532198  | 6,69292E-11 | 3,36075E-10 |
| ING5     | -0,545207082 | 4,719889482 | 6,80767E-11 | 3,41586E-10 |
| NONO     | 0,584458799  | 8,918441919 | 7,08921E-11 | 3,55451E-10 |
| NCAPD2   | 1,027282377  | 6,789533944 | 7,11514E-11 | 3,56489E-10 |
| PSME3    | 0,513663585  | 7,394736939 | 7,12462E-11 | 3,56702E-10 |
| DKK3     | -0,968811906 | 7,126365655 | 7,4134E-11  | 3,70888E-10 |
| GPATCH2  | 0,56554714   | 4,322297069 | 7,83196E-11 | 3,91541E-10 |
| APH1A    | 0,543634281  | 8,555932535 | 8,1139E-11  | 4,05339E-10 |
| GGH      | 1,843742078  | 5,559902432 | 8,14828E-11 | 4,06758E-10 |
| C16orf13 | 0,850737492  | 5,890527968 | 8,20714E-11 | 4,09396E-10 |
| ALG1     | 0,506803748  | 5,995804665 | 8,31177E-11 | 4,14313E-10 |
| HSDL2    | -0,737336366 | 6,473074467 | 8,75016E-11 | 4,35846E-10 |
| BICD2    | -0,684035256 | 5,870167374 | 8,95663E-11 | 4,45805E-10 |
| OST4     | 0,872096268  | 7,781601056 | 9,07605E-11 | 4,51419E-10 |
| VDAC1    | 0,685414707  | 8,029264324 | 9,24887E-11 | 4,5968E-10  |
| ENTPD6   | 0,711236823  | 6,972208285 | 9,31963E-11 | 4,62859E-10 |
| SRP9     | 0,727737026  | 8,623267195 | 9,35499E-11 | 4,64277E-10 |
| POLR2J   | 0,801206883  | 6,028212088 | 9,48073E-11 | 4,70175E-10 |
| PGAM1    | 0,663435532  | 8,597706247 | 9,7167E-11  | 4,81528E-10 |
| CDC34    | 0,745374764  | 5,99425866  | 9,72852E-11 | 4,81763E-10 |
| ADSS     | 0,544832627  | 6,726954975 | 9,81045E-11 | 4,85468E-10 |
| CSF2RB   | -1,011230266 | 5,432087857 | 9,99799E-11 | 4,94389E-10 |
| WDR74    | 0,639564011  | 5,498670636 | 1,00448E-10 | 4,96343E-10 |
| DDX11    | 1,060506314  | 5,047715014 | 1,02687E-10 | 5,07038E-10 |
| TPD52    | 0,826218144  | 7,317537868 | 1,05286E-10 | 5,19498E-10 |
| RBM34    | 0,465520989  | 5,233780759 | 1,14054E-10 | 5,62353E-10 |
| URB1     | 0,777887255  | 6,034701281 | 1,14477E-10 | 5,64029E-10 |
| C17orf70 | 0,538945782  | 5,71183759  | 1,14594E-10 | 5,642E-10   |
| UNC119   | 0,612880434  | 5,070215241 | 1,1478E-10  | 5,64706E-10 |
| GBA      | 0,677127489  | 7,14088116  | 1,15101E-10 | 5,65878E-10 |
| PIGM     | 0,6468125    | 5,292619692 | 1,15491E-10 | 5,67386E-10 |
| ITGAV    | 0,885979131  | 8,07338421  | 1,22638E-10 | 6,02066E-10 |
| TMEM14A  | 0,864242758  | 5,305968935 | 1,2301E-10  | 6,03458E-10 |
| ZNF662   | -0,920416942 | 3,35400285  | 1,23568E-10 | 6,0576E-10  |
| NDUFS1   | 0,544478855  | 6,579726878 | 1,28694E-10 | 6,30433E-10 |
| DCTN1    | -0,504615524 | 7,89650814  | 1,2896E-10  | 6,31227E-10 |
| HEBP1    | -0,582773793 | 5,981767321 | 1,29041E-10 | 6,31227E-10 |
| RFXAP    | -0,586291564 | 2,801085138 | 1,29228E-10 | 6,3169E-10  |

|          |              |             |             |             |
|----------|--------------|-------------|-------------|-------------|
| XRCC5    | 0,410784735  | 8,739652067 | 1,30607E-10 | 6,37971E-10 |
| CAD      | 0,875628201  | 6,199084401 | 1,30967E-10 | 6,39275E-10 |
| LCMT1    | 0,511274935  | 5,355290018 | 1,33097E-10 | 6,49207E-10 |
| NCAPD3   | 0,825463991  | 5,279106689 | 1,341E-10   | 6,5363E-10  |
| RHOA     | -0,456705336 | 9,82641487  | 1,3486E-10  | 6,56862E-10 |
| FAM103A1 | 0,623510428  | 5,296720783 | 1,35695E-10 | 6,60458E-10 |
| CRBN     | -0,702919762 | 5,539478915 | 1,36066E-10 | 6,61794E-10 |
| MAGOHB   | 0,833434657  | 4,437531841 | 1,36649E-10 | 6,63823E-10 |
| TMEM54   | 0,931674688  | 6,490439695 | 1,36678E-10 | 6,63823E-10 |
| AKT3     | -1,034898594 | 5,021838583 | 1,38964E-10 | 6,74444E-10 |
| CFB      | 1,680612279  | 8,467158812 | 1,42605E-10 | 6,91296E-10 |
| ZFAND5   | -0,61737691  | 8,408107321 | 1,42639E-10 | 6,91296E-10 |
| BDH2     | -0,78983011  | 5,608542302 | 1,45001E-10 | 7,02247E-10 |
| RPL36A   | 0,889024963  | 9,181429489 | 1,4721E-10  | 7,12436E-10 |
| STYXL1   | 0,816913306  | 5,692243358 | 1,52462E-10 | 7,37334E-10 |
| B4GALT4  | 0,968019775  | 5,517139806 | 1,52762E-10 | 7,38257E-10 |
| DUSP3    | -0,557356362 | 7,275682596 | 1,5404E-10  | 7,43909E-10 |
| CHCHD2   | 0,934791236  | 8,798248666 | 1,55808E-10 | 7,51915E-10 |
| C9orf116 | -1,290314402 | 3,074996995 | 1,58238E-10 | 7,63101E-10 |
| GFER     | 0,573308896  | 4,829691441 | 1,58412E-10 | 7,63398E-10 |
| MBTPS2   | 0,524740102  | 5,252831066 | 1,59173E-10 | 7,66525E-10 |
| WFDC2    | 1,722584522  | 8,84916087  | 1,60269E-10 | 7,71258E-10 |
| HLTF     | 0,848875528  | 5,930197368 | 1,62841E-10 | 7,83083E-10 |
| AK1      | -1,096033394 | 7,113755474 | 1,62979E-10 | 7,83193E-10 |
| CIQBP    | 0,826168364  | 6,713739432 | 1,68031E-10 | 8,06905E-10 |
| HTT      | -0,629355891 | 7,125047562 | 1,83033E-10 | 8,78328E-10 |
| PPM1K    | -0,696768308 | 4,646414356 | 1,84045E-10 | 8,82564E-10 |
| SETD2    | -0,550131603 | 6,471641593 | 1,89002E-10 | 9,05695E-10 |
| PTMA     | 0,545392529  | 10,8487523  | 1,92444E-10 | 9,20915E-10 |
| PFN2     | 1,510218016  | 7,073697925 | 1,92448E-10 | 9,20915E-10 |
| MRPS7    | 0,660275058  | 6,624211055 | 1,94326E-10 | 9,29248E-10 |
| PTPN14   | -0,740196911 | 3,966361151 | 1,99004E-10 | 9,50953E-10 |
| PIGT     | 0,659840553  | 7,926985561 | 2,00154E-10 | 9,55777E-10 |
| GOLPH3L  | 0,706516304  | 6,302244789 | 2,06439E-10 | 9,85098E-10 |
| PARVA    | -0,532721662 | 6,776889546 | 2,12775E-10 | 1,01463E-09 |
| RINT1    | 0,595016261  | 5,051184323 | 2,13328E-10 | 1,01655E-09 |
| DUSP23   | 1,266936654  | 6,219893982 | 2,22033E-10 | 1,05729E-09 |
| TEX2     | -0,518975074 | 6,212046919 | 2,26702E-10 | 1,07877E-09 |
| SH3GL1   | 0,552097332  | 6,69412726  | 2,27475E-10 | 1,0817E-09  |
| PAAF1    | 0,633036036  | 4,757195514 | 2,31501E-10 | 1,10007E-09 |
| PA2G4    | 0,62341237   | 7,753177288 | 2,33652E-10 | 1,10952E-09 |
| NDUFB4   | 0,706975561  | 6,881025939 | 2,34696E-10 | 1,11371E-09 |
| KATNAL1  | -0,665943025 | 4,464390339 | 2,39494E-10 | 1,13568E-09 |
| CLK2     | 0,636943248  | 5,512369878 | 2,4224E-10  | 1,1479E-09  |
| SMG6     | -0,598428136 | 5,994955736 | 2,45562E-10 | 1,16284E-09 |
| ISCA2    | 0,810211684  | 4,992683174 | 2,52709E-10 | 1,19585E-09 |
| TUBA4A   | 1,078503062  | 7,0190914   | 2,59659E-10 | 1,22789E-09 |
| CDKN2C   | 1,018419722  | 4,31732423  | 2,60047E-10 | 1,22887E-09 |
| ZC3HC1   | 0,52611405   | 4,507888698 | 2,62154E-10 | 1,23797E-09 |
| NOL6     | 0,60788674   | 6,486662834 | 2,67354E-10 | 1,26165E-09 |

|          |              |             |             |             |
|----------|--------------|-------------|-------------|-------------|
| NUCB1    | -0,500175203 | 9,027556644 | 2,69458E-10 | 1,2707E-09  |
| CCDC134  | 0,586508796  | 2,211678584 | 2,80089E-10 | 1,31992E-09 |
| CPOX     | 0,833502529  | 4,977656518 | 2,80965E-10 | 1,32314E-09 |
| SNRPD2   | 0,909548519  | 7,641265371 | 2,82034E-10 | 1,32726E-09 |
| C2orf49  | 0,641712296  | 3,438542418 | 2,99908E-10 | 1,41039E-09 |
| EPB41L3  | -1,103285654 | 5,698829986 | 3,00842E-10 | 1,41381E-09 |
| PPP1CA   | 0,615698659  | 8,217706004 | 3,02048E-10 | 1,4185E-09  |
| FAM76A   | -0,540491756 | 4,434531833 | 3,02865E-10 | 1,42136E-09 |
| MAD2L1BP | 0,545184388  | 5,106658478 | 3,15885E-10 | 1,48144E-09 |
| KCNK5    | 1,427736105  | 6,317562564 | 3,20977E-10 | 1,50429E-09 |
| C10orf76 | -0,381948515 | 5,658004991 | 3,22117E-10 | 1,5086E-09  |
| HAPLN3   | 1,133552634  | 4,458795383 | 3,23133E-10 | 1,51231E-09 |
| TDP1     | 0,737366662  | 4,346343016 | 3,2474E-10  | 1,51879E-09 |
| POLR3E   | 0,470904633  | 5,463923709 | 3,28837E-10 | 1,5369E-09  |
| AFF1     | -0,658988311 | 6,950143938 | 3,34533E-10 | 1,56245E-09 |
| SLC20A1  | 0,842812719  | 6,638474199 | 3,37311E-10 | 1,57435E-09 |
| IL1R1    | -0,845589958 | 7,811860007 | 3,38523E-10 | 1,57892E-09 |
| TIPRL    | 0,64060169   | 6,402494492 | 3,46646E-10 | 1,61571E-09 |
| SRRD     | 0,463442657  | 4,075324387 | 3,58551E-10 | 1,67006E-09 |
| MRPL11   | 0,775347296  | 5,986023912 | 3,6278E-10  | 1,6886E-09  |
| FBXO5    | 0,922105823  | 3,635981433 | 3,71025E-10 | 1,7258E-09  |
| DOCK2    | -1,000989844 | 5,870626149 | 3,72325E-10 | 1,73066E-09 |
| RGS5     | -1,025586085 | 7,412349776 | 3,76902E-10 | 1,75075E-09 |
| SAAL1    | 0,63130661   | 3,621621137 | 3,89625E-10 | 1,80861E-09 |
| ZC3H7A   | -0,470378246 | 6,088928712 | 3,90313E-10 | 1,81057E-09 |
| FNBP1    | -0,64623869  | 6,473902211 | 3,91191E-10 | 1,81341E-09 |
| OAS1     | 1,350607481  | 6,790441479 | 3,91838E-10 | 1,81412E-09 |
| CTDSP1   | -0,431416243 | 7,575470869 | 3,91875E-10 | 1,81412E-09 |
| KLHDC7B  | 1,789172067  | 2,988699825 | 4,04034E-10 | 1,86898E-09 |
| CDK7     | 0,66515106   | 5,19462385  | 4,04274E-10 | 1,86898E-09 |
| SATB1    | -1,008443135 | 5,240523123 | 4,11278E-10 | 1,90007E-09 |
| ROMO1    | 1,02617683   | 6,39281079  | 4,11667E-10 | 1,90058E-09 |
| UBAC2    | 0,563048264  | 6,742118599 | 4,15357E-10 | 1,91632E-09 |
| ZC3H14   | -0,461828079 | 6,169311823 | 4,3271E-10  | 1,99503E-09 |
| TMEM165  | 0,823712095  | 7,552318505 | 4,35315E-10 | 2,00568E-09 |
| NRF1     | -0,323675216 | 4,613869736 | 4,40106E-10 | 2,02639E-09 |
| TAF2     | 0,540075878  | 5,529186998 | 4,4281E-10  | 2,03746E-09 |
| HSD17B10 | 0,587300294  | 6,363576711 | 4,52167E-10 | 2,07911E-09 |
| CUL7     | 0,643701523  | 6,33520953  | 4,61735E-10 | 2,12168E-09 |
| ARHGAP21 | -0,633268196 | 6,836873138 | 4,64838E-10 | 2,1345E-09  |
| TRIM47   | 0,921201779  | 5,971261459 | 4,81704E-10 | 2,21046E-09 |
| NUDT3    | 0,463573016  | 5,279374022 | 4,89236E-10 | 2,24264E-09 |
| KIAA1737 | -0,488778882 | 5,567737331 | 4,89375E-10 | 2,24264E-09 |
| C19orf10 | 0,827763232  | 7,493885057 | 4,9636E-10  | 2,27312E-09 |
| PLEKHA6  | 1,422027429  | 5,917001473 | 5,03389E-10 | 2,30377E-09 |
| AP1S2    | -0,894733003 | 5,385560841 | 5,0796E-10  | 2,32312E-09 |
| CRY1     | -0,6806945   | 5,219260601 | 5,11028E-10 | 2,33559E-09 |
| TUFM     | 0,544123644  | 8,150540142 | 5,12435E-10 | 2,33949E-09 |
| SNRPF    | 0,778803654  | 5,805132696 | 5,12567E-10 | 2,33949E-09 |
| PTS      | 0,907201362  | 4,448687213 | 5,17297E-10 | 2,3595E-09  |



|           |              |             |             |             |
|-----------|--------------|-------------|-------------|-------------|
| CHST15    | 0,9131013    | 6,506470761 | 5,21784E-10 | 2,37837E-09 |
| KRT18     | 1,100720093  | 10,13923946 | 5,30701E-10 | 2,4174E-09  |
| WWTR1     | -0,82793891  | 5,618820678 | 5,35685E-10 | 2,43848E-09 |
| THOP1     | 0,652597098  | 5,284078839 | 5,36941E-10 | 2,44128E-09 |
| OSBPL1A   | -0,691225087 | 5,845073781 | 5,37016E-10 | 2,44128E-09 |
| NIT2      | 0,794927411  | 5,711226086 | 5,39325E-10 | 2,45014E-09 |
| LRFN4     | 1,263415122  | 4,528203557 | 5,47431E-10 | 2,48531E-09 |
| KIAA0232  | -0,590507913 | 6,253455399 | 5,7821E-10  | 2,6233E-09  |
| WAPAL     | -0,416752001 | 6,482631503 | 5,81041E-10 | 2,63439E-09 |
| NR2F6     | 0,714258052  | 6,122289559 | 5,82414E-10 | 2,63886E-09 |
| BET1      | 0,961461135  | 5,70857408  | 5,85729E-10 | 2,65212E-09 |
| EVC       | -0,824211582 | 5,211478375 | 5,87626E-10 | 2,65894E-09 |
| RGPD8     | -0,633441464 | 3,484568288 | 5,92822E-10 | 2,68067E-09 |
| SLFN13    | 0,960383174  | 5,848081346 | 6,02684E-10 | 2,72346E-09 |
| CCDC82    | -0,49320981  | 4,995236985 | 6,05367E-10 | 2,73377E-09 |
| GTPBP4    | 0,675384611  | 6,196575481 | 6,08203E-10 | 2,74476E-09 |
| DDX3X     | -0,539109371 | 8,770237191 | 6,09679E-10 | 2,7496E-09  |
| NFIA      | -0,994033011 | 5,705203139 | 6,2866E-10  | 2,83333E-09 |
| RPAP2     | 0,617001074  | 3,931867643 | 6,30922E-10 | 2,84165E-09 |
| CDC123    | 0,535147124  | 6,331266584 | 6,47212E-10 | 2,91309E-09 |
| TMEM159   | 0,934678307  | 6,48366229  | 6,55798E-10 | 2,94979E-09 |
| FAM45A    | 0,491135454  | 5,559338325 | 6,59819E-10 | 2,96406E-09 |
| ZBTB40    | -0,664528115 | 5,403181007 | 6,59838E-10 | 2,96406E-09 |
| C7orf23   | -0,883618382 | 5,596527809 | 6,70506E-10 | 3,01E-09    |
| OSTF1     | -0,505256734 | 6,201275353 | 6,80946E-10 | 3,05485E-09 |
| FAM120B   | -0,500492071 | 5,2873514   | 6,81901E-10 | 3,05712E-09 |
| MRPL21    | 0,96700502   | 5,522479744 | 6,87567E-10 | 3,0805E-09  |
| HIST1H2AC | 1,2781839    | 6,28007009  | 6,94844E-10 | 3,11106E-09 |
| NIP7      | 0,63334335   | 5,581811079 | 7,12062E-10 | 3,18606E-09 |
| RUVBL1    | 0,691623103  | 6,229285222 | 7,2387E-10  | 3,23677E-09 |
| MTHFD1    | 0,58657697   | 6,541416574 | 7,25288E-10 | 3,24098E-09 |
| ZNF692    | 0,840305469  | 4,541489678 | 7,26407E-10 | 3,24386E-09 |
| LYSMD1    | 0,722587557  | 4,215273315 | 7,33517E-10 | 3,27346E-09 |
| NUPL2     | 0,568927605  | 4,952890427 | 7,35405E-10 | 3,27974E-09 |
| ATP5H     | 0,669886401  | 7,456085764 | 7,38788E-10 | 3,29268E-09 |
| FASN      | -1,035164874 | 8,763559136 | 7,39642E-10 | 3,29433E-09 |
| IP6K1     | -0,413670911 | 6,225074615 | 7,51093E-10 | 3,34315E-09 |
| LRPPRC    | 0,570135876  | 7,700296333 | 7,51655E-10 | 3,34347E-09 |
| FZD5      | -0,841200603 | 6,131324076 | 7,55579E-10 | 3,35873E-09 |
| IFNGR2    | 0,748080788  | 7,592072289 | 7,62574E-10 | 3,38692E-09 |
| TFDP1     | 0,650166443  | 6,760791553 | 7,62914E-10 | 3,38692E-09 |
| SEMA4C    | 0,675013206  | 6,263221334 | 7,73153E-10 | 3,43014E-09 |
| LRP1      | -0,955147298 | 9,257416124 | 7,74557E-10 | 3,43414E-09 |
| NXN       | -0,722279064 | 6,538018425 | 7,7918E-10  | 3,45239E-09 |
| DONSON    | 0,640131299  | 5,323831873 | 7,80156E-10 | 3,45447E-09 |
| ITFG2     | -0,574143891 | 4,816587677 | 7,86367E-10 | 3,47971E-09 |
| HIPK3     | -0,7740904   | 6,205065686 | 8,01223E-10 | 3,54315E-09 |
| GTF2IRD1  | 0,644770348  | 5,362546711 | 8,10554E-10 | 3,58209E-09 |
| ABLIM1    | -1,109932671 | 7,926981641 | 8,13075E-10 | 3,59091E-09 |
| PFDN4     | 0,969417351  | 4,934911478 | 8,15704E-10 | 3,60018E-09 |

|          |              |             |             |             |
|----------|--------------|-------------|-------------|-------------|
| TCEA1    | 0,62310523   | 7,845863622 | 8,19287E-10 | 3,61366E-09 |
| MSN      | -0,691328799 | 10,1773578  | 8,45382E-10 | 3,72635E-09 |
| ECM1     | 1,862631314  | 6,726066872 | 8,6991E-10  | 3,83199E-09 |
| S100A16  | 1,37794331   | 8,112274442 | 8,75549E-10 | 3,85434E-09 |
| RCOR1    | -0,609237164 | 6,190228951 | 8,87194E-10 | 3,90308E-09 |
| MCM5     | 0,697858641  | 6,183307618 | 8,88021E-10 | 3,9042E-09  |
| ARFGAP1  | 0,501376876  | 6,592584461 | 9,08758E-10 | 3,9928E-09  |
| ATP2B4   | -0,811692494 | 8,135825697 | 9,16556E-10 | 4,02446E-09 |
| FXR2     | -0,517515145 | 5,798164458 | 9,25484E-10 | 4,06105E-09 |
| TP53BP2  | -0,602688449 | 6,567858166 | 9,38696E-10 | 4,11638E-09 |
| LEPREL2  | 1,168199704  | 4,919646443 | 9,44533E-10 | 4,13931E-09 |
| TSPYL2   | -0,786215217 | 5,324139915 | 9,72075E-10 | 4,25728E-09 |
| STAU2    | 0,584778967  | 6,186364927 | 9,85628E-10 | 4,31386E-09 |
| EIF1B    | -0,512034918 | 5,64562656  | 9,87794E-10 | 4,31983E-09 |
| CLPTM1L  | 0,941204057  | 8,458919902 | 9,88258E-10 | 4,31983E-09 |
| TDG      | 0,710878887  | 5,573982669 | 9,95206E-10 | 4,34741E-09 |
| C22orf13 | -0,516686357 | 7,232955448 | 1,01675E-09 | 4,43868E-09 |
| SGK3     | -0,509560728 | 5,179381402 | 1,03344E-09 | 4,50867E-09 |
| KARS     | 0,46232765   | 7,57356248  | 1,05484E-09 | 4,59909E-09 |
| TEAD1    | -0,667995189 | 6,937854887 | 1,08009E-09 | 4,70614E-09 |
| FGFR1OP  | 0,65036387   | 3,535744176 | 1,08662E-09 | 4,73157E-09 |
| NT5C3L   | 0,797954306  | 5,939117722 | 1,08792E-09 | 4,73423E-09 |
| FHL3     | 0,892208379  | 4,916185426 | 1,09874E-09 | 4,77828E-09 |
| POLR3D   | 0,560633461  | 4,648653921 | 1,10332E-09 | 4,79511E-09 |
| HMGB2    | 0,922438317  | 6,825416541 | 1,12383E-09 | 4,88113E-09 |
| SNX9     | 0,695347391  | 6,609363877 | 1,14658E-09 | 4,97679E-09 |
| LMAN2    | 0,627026071  | 8,164349465 | 1,15947E-09 | 5,02952E-09 |
| SLC2A3   | -1,106498265 | 6,996191394 | 1,17284E-09 | 5,08428E-09 |
| CSNK2B   | 0,512435146  | 7,442917949 | 1,19277E-09 | 5,16742E-09 |
| SENP6    | -0,448818182 | 6,449162275 | 1,21517E-09 | 5,26112E-09 |
| C3orf14  | 0,946368408  | 4,009813469 | 1,22692E-09 | 5,30863E-09 |
| TSPAN4   | -0,831963071 | 6,675305024 | 1,23642E-09 | 5,34633E-09 |
| SLC38A7  | 0,651375418  | 4,234117076 | 1,27375E-09 | 5,50427E-09 |
| QPCTL    | 0,61286859   | 4,673197513 | 1,28789E-09 | 5,56182E-09 |
| COPB1    | 0,44146784   | 7,941151758 | 1,29875E-09 | 5,60519E-09 |
| AHNAK2   | 1,731639343  | 7,086230522 | 1,31588E-09 | 5,67552E-09 |
| CYBB     | -1,169406254 | 7,875542001 | 1,32491E-09 | 5,71086E-09 |
| ZNF581   | 0,80939395   | 4,711966856 | 1,32746E-09 | 5,71821E-09 |
| BHLHE41  | -1,006406033 | 5,299310459 | 1,34214E-09 | 5,77782E-09 |
| TMEM183A | 0,74263254   | 7,083136981 | 1,34784E-09 | 5,7987E-09  |
| SSRP1    | 0,50277447   | 7,823039209 | 1,38574E-09 | 5,95798E-09 |
| CLIC4    | -0,659243777 | 8,417205158 | 1,3905E-09  | 5,9747E-09  |
| UMPS     | 0,522473883  | 5,355195888 | 1,39331E-09 | 5,98297E-09 |
| NPIP     | -0,786954686 | 4,824300131 | 1,40511E-09 | 6,02984E-09 |
| TSC1     | -0,565851129 | 5,506412397 | 1,48684E-09 | 6,37656E-09 |
| SDC2     | -0,95611636  | 6,552391195 | 1,49636E-09 | 6,41339E-09 |
| INPP4B   | 1,368313527  | 4,272864078 | 1,49829E-09 | 6,41761E-09 |
| BANF1    | 0,676639582  | 7,525168964 | 1,53874E-09 | 6,58672E-09 |
| XRCC2    | 0,789121953  | 2,888978323 | 1,54906E-09 | 6,62674E-09 |
| ENPP2    | -0,994270848 | 6,67115039  | 1,6238E-09  | 6,94213E-09 |

|         |              |             |             |             |
|---------|--------------|-------------|-------------|-------------|
| TBCE    | 0,639730878  | 5,010766558 | 1,63344E-09 | 6,97896E-09 |
| CRIP1   | 0,84473549   | 5,114966502 | 1,64911E-09 | 7,04152E-09 |
| RSRC1   | 0,645736548  | 4,42679171  | 1,71375E-09 | 7,31293E-09 |
| PSMD2   | 0,623333501  | 8,351751982 | 1,72434E-09 | 7,35352E-09 |
| CCT2    | 1,467436518  | 8,266945713 | 1,76903E-09 | 7,53937E-09 |
| FBXL20  | 0,709558274  | 3,828747543 | 1,79084E-09 | 7,62758E-09 |
| PLXNA2  | -1,107270731 | 6,712129741 | 1,81963E-09 | 7,74534E-09 |
| TRUB1   | 0,592239954  | 5,245948906 | 1,83065E-09 | 7,78741E-09 |
| MORC3   | -0,412940749 | 5,517842495 | 1,85612E-09 | 7,89084E-09 |
| ROCK1   | -0,569525356 | 6,713646043 | 1,8658E-09  | 7,92702E-09 |
| SNAPIN  | 0,703538586  | 5,948964329 | 1,87448E-09 | 7,95895E-09 |
| NUP88   | 0,582856269  | 5,718799364 | 1,87922E-09 | 7,96998E-09 |
| KAT5    | -0,36852554  | 6,053914781 | 1,87942E-09 | 7,96998E-09 |
| SSR3    | 0,683909012  | 8,403436276 | 1,8822E-09  | 7,97682E-09 |
| DDIT4   | 1,395771281  | 8,22415138  | 1,89284E-09 | 8,01693E-09 |
| C1GALT1 | 0,926445448  | 5,351771737 | 1,89591E-09 | 8,02498E-09 |
| NFXL1   | 0,58573697   | 4,057739384 | 1,92925E-09 | 8,15643E-09 |
| SRP72   | 0,519260584  | 7,515576808 | 1,92936E-09 | 8,15643E-09 |
| MEIS2   | -0,868344324 | 4,170557611 | 1,9322E-09  | 8,16338E-09 |
| DHX34   | 0,653252442  | 4,752892999 | 1,93405E-09 | 8,16613E-09 |
| GOLT1B  | 0,940414908  | 6,713735272 | 1,96931E-09 | 8,30984E-09 |
| TAF10   | 0,632638911  | 6,172755148 | 2,05065E-09 | 8,64774E-09 |
| BMPR1A  | -0,48091725  | 5,56262914  | 2,07497E-09 | 8,74489E-09 |
| GGCX    | 0,846310199  | 6,639011376 | 2,12996E-09 | 8,97109E-09 |
| C5orf28 | 0,752165379  | 4,699444976 | 2,13331E-09 | 8,97964E-09 |
| ELMO3   | 0,946667485  | 5,667149605 | 2,13934E-09 | 8,99775E-09 |
| MRPL27  | 0,718661778  | 5,800180781 | 2,14025E-09 | 8,99775E-09 |
| NIPAL3  | -0,686129942 | 6,190118185 | 2,16006E-09 | 9,07544E-09 |
| HIBADH  | 0,60040216   | 6,232895379 | 2,17166E-09 | 9,11856E-09 |
| FBL     | 0,651297486  | 7,201172842 | 2,1886E-09  | 9,18405E-09 |
| ERI3    | 0,510075097  | 6,106991289 | 2,19695E-09 | 9,2134E-09  |
| SFT2D2  | 0,681223732  | 3,061783406 | 2,27682E-09 | 9,54249E-09 |
| RIN3    | -0,70190536  | 5,795712082 | 2,32303E-09 | 9,72667E-09 |
| SPATA20 | 0,793462102  | 6,341046236 | 2,32362E-09 | 9,72667E-09 |
| FYCO1   | -0,729196544 | 6,536342575 | 2,32709E-09 | 9,73523E-09 |
| UBD     | 2,155148162  | 6,035027147 | 2,39363E-09 | 1,00024E-08 |
| TMEM99  | 1,060358423  | 4,4747962   | 2,39389E-09 | 1,00024E-08 |
| AAMP    | 0,411105048  | 7,27796896  | 2,41993E-09 | 1,0105E-08  |
| NPEPPS  | 0,529517809  | 7,52899313  | 2,42636E-09 | 1,01257E-08 |
| LAPTM5  | -0,891001571 | 9,253141725 | 2,43898E-09 | 1,01721E-08 |
| ADIPOR2 | -0,667205349 | 6,990517697 | 2,53089E-09 | 1,0549E-08  |
| RRS1    | 0,83350074   | 5,066945179 | 2,53526E-09 | 1,05608E-08 |
| GSTA4   | -0,994626622 | 5,410401967 | 2,5795E-09  | 1,07385E-08 |
| ARPP19  | -0,436907901 | 8,001789374 | 2,58928E-09 | 1,07726E-08 |
| MRPS18A | 0,615827015  | 5,782399781 | 2,65085E-09 | 1,1022E-08  |
| VPS36   | -0,515561426 | 6,151510922 | 2,72092E-09 | 1,13065E-08 |
| SLC26A6 | 0,776554888  | 3,893482685 | 2,75256E-09 | 1,1431E-08  |
| METTL5  | 0,653576     | 5,181177312 | 2,77929E-09 | 1,1535E-08  |
| MRPS15  | 0,883044431  | 6,654335897 | 2,86908E-09 | 1,19004E-08 |
| PPIA    | 0,671930121  | 10,60249852 | 2,87306E-09 | 1,19097E-08 |

|           |              |             |             |             |
|-----------|--------------|-------------|-------------|-------------|
| RABGAP1   | -0,503081654 | 6,322251319 | 2,88234E-09 | 1,19409E-08 |
| GOT2      | 0,551898372  | 6,939134518 | 2,89628E-09 | 1,19913E-08 |
| EPM2AIP1  | -0,52592632  | 5,655310219 | 2,94476E-09 | 1,21847E-08 |
| MLLT1     | -0,605699087 | 6,74768339  | 2,9533E-09  | 1,22126E-08 |
| EEF1E1    | 0,684313939  | 4,401343083 | 2,99546E-09 | 1,23794E-08 |
| ADRM1     | 0,554805232  | 7,123319849 | 3,02826E-09 | 1,25074E-08 |
| TMUB1     | 0,612894779  | 5,673396944 | 3,07841E-09 | 1,27028E-08 |
| TMEM176B  | 1,216015359  | 7,470979281 | 3,07931E-09 | 1,27028E-08 |
| STRBP     | 0,635131828  | 5,430072649 | 3,1479E-09  | 1,29779E-08 |
| COPS6     | 0,593736377  | 7,036914694 | 3,17057E-09 | 1,30635E-08 |
| CHPT1     | -0,877035905 | 5,917992129 | 3,18522E-09 | 1,31159E-08 |
| UBE2Z     | 0,400084207  | 7,566825284 | 3,22383E-09 | 1,32669E-08 |
| MGC2752   | -0,42182321  | 5,496549001 | 3,23439E-09 | 1,33024E-08 |
| MED14     | 0,527363391  | 6,441419933 | 3,25363E-09 | 1,33734E-08 |
| PHKG2     | 0,602093465  | 5,438812274 | 3,29797E-09 | 1,35475E-08 |
| COPS8     | 0,498314484  | 6,134402766 | 3,33217E-09 | 1,36798E-08 |
| IDI1      | -0,809073671 | 6,801032975 | 3,44861E-09 | 1,41493E-08 |
| RHBDD3    | 0,756796701  | 4,520050013 | 3,49291E-09 | 1,43224E-08 |
| MORF4L2   | 0,602730326  | 8,308126695 | 3,50413E-09 | 1,43598E-08 |
| SLC23A2   | -0,70079127  | 5,626443829 | 3,51525E-09 | 1,43967E-08 |
| RUFY3     | -0,608138601 | 5,697728063 | 3,53274E-09 | 1,44596E-08 |
| GPR56     | 1,152846407  | 7,649840762 | 3,58026E-09 | 1,46453E-08 |
| HCK       | -1,044724124 | 6,167271079 | 3,59224E-09 | 1,46855E-08 |
| LOC550112 | 0,490544112  | 3,980395681 | 3,82025E-09 | 1,56083E-08 |
| MRPS26    | 0,749787175  | 5,774803375 | 3,84738E-09 | 1,57097E-08 |
| RPL8      | 0,877367809  | 11,29000328 | 3,86194E-09 | 1,57598E-08 |
| IFI30     | -0,882925535 | 8,295939242 | 3,92897E-09 | 1,60237E-08 |
| RPS18     | 1,112261866  | 11,56374767 | 3,94153E-09 | 1,60653E-08 |
| IDE       | 0,633039484  | 5,377511186 | 4,00794E-09 | 1,63263E-08 |
| NDE1      | 0,628732603  | 5,131961004 | 4,04389E-09 | 1,64629E-08 |
| MRPL44    | 0,507316848  | 5,511321579 | 4,07933E-09 | 1,65972E-08 |
| EXOC6     | -0,456121084 | 5,254670584 | 4,10086E-09 | 1,66749E-08 |
| PINK1     | -0,480985795 | 6,794311281 | 4,12956E-09 | 1,67816E-08 |
| PDCL      | -0,368669189 | 5,232298498 | 4,19397E-09 | 1,70332E-08 |
| LAIR1     | -0,799261751 | 6,319179644 | 4,20913E-09 | 1,70845E-08 |
| CLTC      | 0,498028377  | 9,586711511 | 4,23585E-09 | 1,71828E-08 |
| BIN2      | -0,881329995 | 4,556251787 | 4,291E-09   | 1,73962E-08 |
| GALNT4    | 1,164867678  | 5,852158798 | 4,29476E-09 | 1,74011E-08 |
| SNX14     | -0,479641832 | 6,517671643 | 4,32884E-09 | 1,75287E-08 |
| DCTN5     | 0,507943483  | 6,637514137 | 4,40987E-09 | 1,78462E-08 |
| B3GALNT2  | 0,588642228  | 5,470779652 | 4,48815E-09 | 1,81523E-08 |
| STEAP2    | 1,160976701  | 5,587860541 | 4,49323E-09 | 1,8162E-08  |
| FAM57A    | 0,776222784  | 5,104873833 | 4,52644E-09 | 1,82854E-08 |
| ASAHI     | -0,794785155 | 9,28386679  | 4,54677E-09 | 1,83567E-08 |
| JUP       | 0,944980545  | 9,727607924 | 4,60607E-09 | 1,85851E-08 |
| PRDX2     | 0,775823539  | 7,713253912 | 4,68474E-09 | 1,88913E-08 |
| SSR2      | 0,684128801  | 8,931390205 | 4,74385E-09 | 1,91184E-08 |
| MTF1      | -0,532028879 | 5,211596396 | 4,76176E-09 | 1,91792E-08 |
| CLIP4     | -0,677809931 | 5,796620462 | 4,76733E-09 | 1,91903E-08 |
| RGS10     | 1,004170012  | 5,577535153 | 4,80241E-09 | 1,93202E-08 |

|           |              |             |             |             |
|-----------|--------------|-------------|-------------|-------------|
| GPX7      | 1,016546269  | 4,400929596 | 4,81694E-09 | 1,93672E-08 |
| SAV1      | -0,430972684 | 5,835889611 | 4,87695E-09 | 1,95969E-08 |
| TSPAN13   | -0,84227562  | 8,690927042 | 4,90238E-09 | 1,96875E-08 |
| NR3C1     | -0,591673438 | 7,17868447  | 4,94291E-09 | 1,98385E-08 |
| USP21     | 0,576517459  | 5,270256516 | 4,98338E-09 | 1,99892E-08 |
| LOC388796 | 0,859713713  | 4,572585249 | 4,99249E-09 | 2,0014E-08  |
| U2AF2     | 0,39984155   | 7,490599349 | 5,05529E-09 | 2,02493E-08 |
| JAK1      | -0,531484555 | 8,001517913 | 5,05712E-09 | 2,02493E-08 |
| ARHGAP17  | -0,417530229 | 6,095476936 | 5,06331E-09 | 2,02622E-08 |
| YIPF6     | 0,673209002  | 4,997070303 | 5,2237E-09  | 2,08917E-08 |
| RANBP3    | -0,352815775 | 6,17278278  | 5,24439E-09 | 2,09622E-08 |
| RPL7L1    | 0,408662263  | 6,876934    | 5,25062E-09 | 2,09748E-08 |
| RBBP7     | 0,453567146  | 7,169640679 | 5,27567E-09 | 2,10574E-08 |
| EMB       | 1,176376135  | 7,107669833 | 5,27747E-09 | 2,10574E-08 |
| SETDB1    | 0,534479583  | 6,063808231 | 5,37484E-09 | 2,14334E-08 |
| KCTD5     | 0,679245775  | 6,060241107 | 5,43713E-09 | 2,16691E-08 |
| MKNK1     | -0,435947375 | 5,453377807 | 5,50099E-09 | 2,19108E-08 |
| SLC25A22  | 0,642965719  | 5,238592759 | 5,51584E-09 | 2,19571E-08 |
| PEBP1     | -0,565545601 | 8,537142012 | 5,52994E-09 | 2,20004E-08 |
| PRR3      | 0,587686662  | 4,053766224 | 5,54416E-09 | 2,20441E-08 |
| MAPK13    | 0,728231702  | 6,975535301 | 5,56362E-09 | 2,21086E-08 |
| MASTL     | 0,690225312  | 4,422135509 | 5,5859E-09  | 2,21842E-08 |
| ZYX       | -0,646876631 | 8,228848649 | 5,64093E-09 | 2,23784E-08 |
| OAT       | 0,869375042  | 7,474112359 | 5,64136E-09 | 2,23784E-08 |
| NOL7      | 0,407992216  | 5,898727422 | 5,64757E-09 | 2,239E-08   |
| GAN       | 0,824724788  | 2,01885607  | 5,8045E-09  | 2,29988E-08 |
| NUP210    | 1,018356509  | 6,878379481 | 5,82032E-09 | 2,30481E-08 |
| SND1      | 0,459723111  | 8,371387991 | 5,83341E-09 | 2,30865E-08 |
| WDR43     | 0,573261766  | 6,130287126 | 5,88485E-09 | 2,32765E-08 |
| CHID1     | 0,579992938  | 6,931399022 | 5,9253E-09  | 2,3423E-08  |
| MRPS6     | 1,057857522  | 6,380231605 | 5,98672E-09 | 2,36521E-08 |
| LOC387647 | -0,42383512  | 4,753092833 | 6,04538E-09 | 2,387E-08   |
| TPD52L2   | 0,569826761  | 7,75858249  | 6,08412E-09 | 2,4009E-08  |
| SOX13     | -0,848391677 | 5,684012563 | 6,29599E-09 | 2,48266E-08 |
| ADCY7     | -0,736567884 | 6,398228611 | 6,29858E-09 | 2,48266E-08 |
| POLR3C    | 0,490612943  | 5,400537685 | 6,59202E-09 | 2,59682E-08 |
| TRMT6     | 0,578630423  | 4,986681996 | 6,62178E-09 | 2,60704E-08 |
| NUP35     | 0,580752578  | 4,11136182  | 6,74601E-09 | 2,65374E-08 |
| APPL1     | -0,375470099 | 6,345739879 | 6,74818E-09 | 2,65374E-08 |
| MUM1      | -0,535318359 | 5,288299319 | 6,75727E-09 | 2,65578E-08 |
| LSM4      | 0,678007361  | 6,812704412 | 6,79147E-09 | 2,66769E-08 |
| GATC      | 0,705532403  | 2,266663636 | 6,79964E-09 | 2,66936E-08 |
| TOB2      | -0,542235562 | 6,883484194 | 6,92598E-09 | 2,71739E-08 |
| TMEM231   | -1,099874815 | 5,12045195  | 7,00228E-09 | 2,74575E-08 |
| NRBP1     | 0,361034888  | 7,25630202  | 7,03455E-09 | 2,75682E-08 |
| COPS7B    | 0,432551656  | 5,552845771 | 7,1481E-09  | 2,79971E-08 |
| EIF2AK2   | 0,638476588  | 5,331841293 | 7,16173E-09 | 2,80343E-08 |
| SUMO2     | 0,493931407  | 8,400714889 | 7,37911E-09 | 2,88586E-08 |
| NDUFB11   | 0,595231612  | 6,826539484 | 7,38176E-09 | 2,88586E-08 |
| EXOSC2    | 0,497146604  | 4,882699901 | 7,38498E-09 | 2,88586E-08 |

|          |              |             |             |             |
|----------|--------------|-------------|-------------|-------------|
| MARCH5   | 0,436508506  | 6,100530509 | 7,43332E-09 | 2,90308E-08 |
| ZNF160   | -0,509943754 | 5,128742286 | 7,48762E-09 | 2,92261E-08 |
| ZC3HAV1  | -0,456615611 | 6,442589234 | 7,57847E-09 | 2,95589E-08 |
| USP14    | 0,449485178  | 6,580493412 | 7,58155E-09 | 2,95589E-08 |
| ITGA2    | 1,498723705  | 7,109593692 | 7,61587E-09 | 2,96758E-08 |
| TFRC     | -1,019340775 | 8,213664389 | 7,64202E-09 | 2,97607E-08 |
| C16orf52 | -0,476898768 | 4,3840558   | 7,70091E-09 | 2,99729E-08 |
| EEF1G    | 0,620251624  | 11,14774768 | 7,79134E-09 | 3,03076E-08 |
| C7orf13  | 1,062054008  | 3,63128504  | 7,79612E-09 | 3,03089E-08 |
| MPRIIP   | -0,647344343 | 7,341812018 | 7,86884E-09 | 3,05741E-08 |
| SLC41A2  | 0,791966529  | 5,196294048 | 7,94034E-09 | 3,08344E-08 |
| FTSJ2    | 0,485062612  | 5,560813788 | 8,09164E-09 | 3,14041E-08 |
| NACC1    | 0,679887228  | 6,827246256 | 8,12369E-09 | 3,15105E-08 |
| RASSF3   | -0,761845176 | 4,704773286 | 8,30428E-09 | 3,21927E-08 |
| DPAGT1   | 0,503656468  | 5,983680443 | 8,39121E-09 | 3,25112E-08 |
| ATF5     | 0,977955256  | 6,201082618 | 8,46755E-09 | 3,27883E-08 |
| ATP5G3   | 0,678275155  | 7,779453894 | 8,5492E-09  | 3,30857E-08 |
| PDIK1L   | 0,686585132  | 4,717200784 | 8,83474E-09 | 3,41699E-08 |
| ETV1     | -1,099339445 | 6,344727996 | 8,83937E-09 | 3,41699E-08 |
| RGPD6    | -0,598836446 | 5,184728163 | 8,89209E-09 | 3,43542E-08 |
| KLF11    | -0,614681284 | 5,578701031 | 9,00037E-09 | 3,47451E-08 |
| ZDHHC4   | 0,538513424  | 6,315459761 | 9,00347E-09 | 3,47451E-08 |
| HDAC2    | 0,589319849  | 7,048139198 | 9,22482E-09 | 3,55792E-08 |
| UBA7     | -0,646519123 | 6,300092023 | 9,28869E-09 | 3,57943E-08 |
| SRP54    | 0,699445999  | 6,782667709 | 9,29109E-09 | 3,57943E-08 |
| POLE3    | 0,598478861  | 6,74589626  | 9,54997E-09 | 3,67709E-08 |
| RNF187   | 0,459495618  | 7,388510358 | 9,67529E-09 | 3,72324E-08 |
| CKAP5    | 0,699198113  | 7,05350753  | 9,83312E-09 | 3,78184E-08 |
| TRPM2    | 1,216465712  | 4,303591495 | 1,00289E-08 | 3,85497E-08 |
| FAF1     | 0,378246953  | 6,0102261   | 1,00768E-08 | 3,87118E-08 |
| CSE1L    | 0,662144495  | 6,97512076  | 1,00834E-08 | 3,87154E-08 |
| KIAA0913 | -0,478962177 | 6,557808288 | 1,01E-08    | 3,87573E-08 |
| RPLP0    | 0,857480107  | 11,3646215  | 1,01275E-08 | 3,8841E-08  |
| MBOAT7   | 0,582524775  | 6,652604252 | 1,01346E-08 | 3,88464E-08 |
| TYROBP   | -1,011374186 | 7,382225902 | 1,04284E-08 | 3,99501E-08 |
| TSEN34   | 0,529023892  | 6,150606136 | 1,05598E-08 | 4,04308E-08 |
| RPL26L1  | 0,7647003    | 5,113214193 | 1,06666E-08 | 4,08168E-08 |
| METTL9   | 0,551074494  | 7,192390077 | 1,07343E-08 | 4,1053E-08  |
| PRKDC    | 0,868348026  | 8,020318711 | 1,07473E-08 | 4,10796E-08 |
| C8orf59  | 0,798005161  | 5,746166337 | 1,07648E-08 | 4,11233E-08 |
| HGS      | 0,474497543  | 7,120141686 | 1,08E-08    | 4,12349E-08 |
| NLRP1    | -0,873817611 | 4,997358828 | 1,09773E-08 | 4,18677E-08 |
| GTPBP1   | -0,483160716 | 6,526074924 | 1,09781E-08 | 4,18677E-08 |
| LIN9     | 0,701127011  | 3,682359301 | 1,10995E-08 | 4,23071E-08 |
| FAM104A  | 0,358405961  | 5,510347966 | 1,11374E-08 | 4,24278E-08 |
| FARSA    | 0,448145578  | 6,144339398 | 1,12346E-08 | 4,27741E-08 |
| THUMPD3  | 0,346439573  | 5,735770177 | 1,15452E-08 | 4,39324E-08 |
| YIPF3    | 0,480375751  | 7,786658713 | 1,15571E-08 | 4,3953E-08  |
| FAM89B   | 0,565769104  | 6,266172116 | 1,15879E-08 | 4,40455E-08 |
| FCGR3A   | -1,048428017 | 8,045413365 | 1,16938E-08 | 4,44235E-08 |

|          |              |             |             |             |
|----------|--------------|-------------|-------------|-------------|
| BATF     | 1,14289954   | 4,099658051 | 1,17327E-08 | 4,45463E-08 |
| DYNC2LI1 | -0,526948633 | 4,724113482 | 1,1766E-08  | 4,46481E-08 |
| ELMOD2   | 0,517301685  | 4,120600577 | 1,18619E-08 | 4,49867E-08 |
| ARF1     | 0,449066962  | 9,77375579  | 1,21931E-08 | 4,6217E-08  |
| KLHL23   | 0,942805968  | 3,677783653 | 1,22698E-08 | 4,64822E-08 |
| MECP2    | -0,534727966 | 6,384347449 | 1,23106E-08 | 4,66107E-08 |
| TOPBP1   | 0,680260182  | 5,757909016 | 1,23577E-08 | 4,6763E-08  |
| SEL1L3   | 0,69857911   | 8,063302329 | 1,24083E-08 | 4,69285E-08 |
| PLAT     | 2,10623509   | 7,879178358 | 1,24179E-08 | 4,6939E-08  |
| HSPA14   | 0,698645902  | 5,234554881 | 1,27418E-08 | 4,81363E-08 |
| HMGXB4   | 0,456745759  | 5,365280823 | 1,27891E-08 | 4,82883E-08 |
| CCL2     | -1,251894963 | 6,664848331 | 1,28008E-08 | 4,83059E-08 |
| MCCC2    | 0,576427029  | 6,682723445 | 1,29806E-08 | 4,89574E-08 |
| PDLIM4   | 1,62804915   | 5,091825957 | 1,30398E-08 | 4,91532E-08 |
| MAPKBP1  | -0,617527433 | 4,795358004 | 1,3054E-08  | 4,91798E-08 |
| DRAP1    | 0,670295233  | 6,627387037 | 1,32235E-08 | 4,97909E-08 |
| MAN2A2   | -0,581016074 | 6,321681194 | 1,33541E-08 | 5,02549E-08 |
| EIF5A    | 0,647948537  | 9,103910493 | 1,34815E-08 | 5,07063E-08 |
| FGD6     | 0,836731972  | 6,134271077 | 1,35509E-08 | 5,09392E-08 |
| MINPP1   | 0,547412189  | 5,215824675 | 1,36346E-08 | 5,12255E-08 |
| ZYG11B   | -0,375460746 | 6,00629716  | 1,37326E-08 | 5,15653E-08 |
| KDM4C    | -0,434453204 | 5,178015999 | 1,37641E-08 | 5,16483E-08 |
| CBL      | -0,629304134 | 5,754190652 | 1,37699E-08 | 5,16483E-08 |
| CRTAP    | -0,50756483  | 7,992027689 | 1,38433E-08 | 5,18954E-08 |
| ZHX2     | -0,543436808 | 5,635463267 | 1,38852E-08 | 5,20238E-08 |
| MFSD3    | 0,860054082  | 4,367261926 | 1,3926E-08  | 5,2148E-08  |
| ATG2B    | -0,570870574 | 5,557040106 | 1,41061E-08 | 5,27933E-08 |
| MESDC1   | -0,601535661 | 5,436429512 | 1,41651E-08 | 5,29852E-08 |
| MTERFD1  | 0,687748724  | 4,552118686 | 1,41802E-08 | 5,30125E-08 |
| C19orf24 | 0,649088542  | 5,322790062 | 1,42131E-08 | 5,31065E-08 |
| RTEL1    | 0,895931702  | 5,148810089 | 1,42556E-08 | 5,32359E-08 |
| AKIRIN2  | -0,422728152 | 5,86949479  | 1,49922E-08 | 5,5956E-08  |
| KPNA3    | -0,43771248  | 6,479074634 | 1,52169E-08 | 5,67638E-08 |
| NUDT16L1 | 0,677574075  | 5,455794779 | 1,53616E-08 | 5,7272E-08  |
| NOP14    | 0,410670115  | 6,061193917 | 1,55549E-08 | 5,79612E-08 |
| FBLIM1   | 0,68486127   | 6,541381959 | 1,56829E-08 | 5,84063E-08 |
| RNF115   | 0,558513085  | 5,262783959 | 1,61704E-08 | 6,01889E-08 |
| OLFML2A  | -0,998072679 | 5,592338025 | 1,63067E-08 | 6,06629E-08 |
| CYCS     | 0,719153373  | 7,799024884 | 1,63183E-08 | 6,0673E-08  |
| DDX23    | 0,463434105  | 7,552231256 | 1,65569E-08 | 6,15267E-08 |
| CCDC93   | -0,485411158 | 5,588066374 | 1,67458E-08 | 6,21949E-08 |
| ATP5G1   | 0,794524783  | 6,150707162 | 1,69841E-08 | 6,30453E-08 |
| ARGLU1   | -0,767209925 | 6,734849492 | 1,70943E-08 | 6,34202E-08 |
| NOC3L    | 0,503214521  | 4,803654208 | 1,73954E-08 | 6,44676E-08 |
| MRPL51   | 0,678850488  | 6,795293139 | 1,73956E-08 | 6,44676E-08 |
| JAK3     | 0,762393255  | 5,127059399 | 1,74585E-08 | 6,46658E-08 |
| TAF12    | 0,526120064  | 5,036329333 | 1,75526E-08 | 6,49788E-08 |
| VEZF1    | -0,448533907 | 6,822894856 | 1,76995E-08 | 6,54871E-08 |
| CTBP2    | 0,431690201  | 6,995904355 | 1,80325E-08 | 6,6683E-08  |
| INPP5B   | -0,693443993 | 5,572582818 | 1,84361E-08 | 6,81388E-08 |

|          |              |             |             |             |
|----------|--------------|-------------|-------------|-------------|
| MRPL28   | 0,514132116  | 6,078823297 | 1,85387E-08 | 6,84807E-08 |
| RHEB     | 0,790109557  | 7,620053627 | 1,87887E-08 | 6,93666E-08 |
| OLFML2B  | 1,106796     | 5,579071341 | 1,89244E-08 | 6,98297E-08 |
| PRDX3    | 0,698457996  | 7,872826228 | 1,90077E-08 | 7,00993E-08 |
| TCEB3    | -0,457949394 | 6,890115648 | 1,91481E-08 | 7,0579E-08  |
| ATP2A2   | 0,588358083  | 9,012881673 | 1,92289E-08 | 7,08383E-08 |
| METTL2B  | 0,548641564  | 5,009641204 | 1,95025E-08 | 7,18076E-08 |
| SIK3     | -0,537174353 | 5,792329556 | 1,95837E-08 | 7,20677E-08 |
| AURKAIP1 | 0,708914546  | 6,587590924 | 1,96036E-08 | 7,21021E-08 |
| ANKMY1   | -0,666795995 | 4,094697149 | 1,98348E-08 | 7,29131E-08 |
| ATP5J2   | 0,907342733  | 7,256434489 | 1,98761E-08 | 7,30254E-08 |
| FOXO3B   | -0,630274182 | 3,488786786 | 1,99908E-08 | 7,34071E-08 |
| TPMT     | 0,511015539  | 6,054141718 | 2,0352E-08  | 7,46933E-08 |
| SLC33A1  | 0,449043189  | 5,69763038  | 2,03865E-08 | 7,47799E-08 |
| SLC1A5   | 0,668517738  | 7,833216998 | 2,06665E-08 | 7,57662E-08 |
| TSPAN5   | 1,101504828  | 3,522375417 | 2,0851E-08  | 7,64015E-08 |
| USP53    | -0,619473349 | 5,911432613 | 2,09376E-08 | 7,66776E-08 |
| MRPL4    | 0,542233625  | 5,941144367 | 2,18124E-08 | 7,98383E-08 |
| ZNF136   | -0,432601073 | 3,922738964 | 2,19177E-08 | 8,01808E-08 |
| HAUS2    | -0,346137493 | 5,550025811 | 2,20502E-08 | 8,06223E-08 |
| FADS3    | -0,774581001 | 5,106420479 | 2,22656E-08 | 8,13661E-08 |
| TMEM134  | 0,679262548  | 5,556943519 | 2,22996E-08 | 8,14468E-08 |
| PLEKHM2  | -0,388069414 | 6,804829586 | 2,26517E-08 | 8,26815E-08 |
| DICER1   | -0,551487829 | 6,352614382 | 2,26619E-08 | 8,26815E-08 |
| E2F6     | 0,530491552  | 4,912285934 | 2,32796E-08 | 8,48895E-08 |
| UBE2W    | 0,711448058  | 6,14447458  | 2,34468E-08 | 8,54535E-08 |
| ATP6V1B2 | -0,515246512 | 7,57160075  | 2,34682E-08 | 8,5486E-08  |
| PMS2CL   | 0,515603407  | 3,564050057 | 2,35989E-08 | 8,5916E-08  |
| HSF1     | 0,492580428  | 6,905575828 | 2,44677E-08 | 8,90317E-08 |
| MGAT2    | 0,596776067  | 6,142993416 | 2,45039E-08 | 8,91156E-08 |
| ERH      | 0,636331313  | 7,211590429 | 2,47175E-08 | 8,98446E-08 |
| KLHL15   | -0,515542146 | 4,107223367 | 2,48665E-08 | 9,0338E-08  |
| ZNF654   | -0,430973181 | 4,381505952 | 2,49065E-08 | 9,04354E-08 |
| SYNJ1    | -0,564879532 | 4,527263846 | 2,56495E-08 | 9,30834E-08 |
| NBEAL1   | -0,863624903 | 4,038402565 | 2,5846E-08  | 9,37466E-08 |
| CAMKK2   | -0,388177301 | 6,350162741 | 2,5905E-08  | 9,39109E-08 |
| VPS45    | 0,50054194   | 5,88558533  | 2,61901E-08 | 9,48938E-08 |
| COQ6     | 0,50615445   | 4,593919873 | 2,62956E-08 | 9,52256E-08 |
| IDH3G    | 0,491716153  | 6,233359771 | 2,65684E-08 | 9,61623E-08 |
| SRP68    | 0,393414167  | 7,290786186 | 2,68336E-08 | 9,70707E-08 |
| UBTD1    | -0,680990296 | 5,658692323 | 2,70676E-08 | 9,78652E-08 |
| WDR35    | -0,621517289 | 4,640855709 | 2,77483E-08 | 1,00273E-07 |
| PSMC6    | 0,639496154  | 6,972544952 | 2,78895E-08 | 1,00723E-07 |
| SAT2     | -0,585142544 | 5,58768666  | 2,79023E-08 | 1,00723E-07 |
| ZNF259   | 0,458093191  | 5,83603598  | 2,8161E-08  | 1,01575E-07 |
| ECHS1    | 0,55353387   | 7,369081442 | 2,8168E-08  | 1,01575E-07 |
| ZNF264   | -0,514723544 | 5,730910597 | 2,87191E-08 | 1,03507E-07 |
| ACAT1    | -0,642356015 | 6,318497838 | 2,88727E-08 | 1,04006E-07 |
| PCNX     | -0,555015218 | 6,228890469 | 2,90166E-08 | 1,04469E-07 |
| GPSM2    | 0,594530299  | 5,027381765 | 2,97119E-08 | 1,06916E-07 |



|          |              |             |             |             |
|----------|--------------|-------------|-------------|-------------|
| TMEM66   | -0,507750087 | 8,659553765 | 3,01135E-08 | 1,08265E-07 |
| YTHDF1   | 0,438517721  | 6,669999686 | 3,01187E-08 | 1,08265E-07 |
| PSMA6    | 0,959352191  | 7,890690862 | 3,03338E-08 | 1,08981E-07 |
| MRPL47   | 0,637930812  | 5,450739263 | 3,04702E-08 | 1,0938E-07  |
| ZNF623   | 0,589829012  | 4,703086131 | 3,0477E-08  | 1,0938E-07  |
| FBF1     | 0,464965428  | 5,110301868 | 3,06933E-08 | 1,10099E-07 |
| ATXN2L   | 0,449706929  | 7,463430515 | 3,08435E-08 | 1,10579E-07 |
| PLCB2    | -0,877470742 | 5,36823042  | 3,1359E-08  | 1,12368E-07 |
| RAB28    | -0,436866251 | 4,532735553 | 3,14981E-08 | 1,12807E-07 |
| RAD51C   | 0,497520764  | 4,063506756 | 3,15853E-08 | 1,1306E-07  |
| KIAA1522 | 0,658622934  | 7,911886698 | 3,19086E-08 | 1,14158E-07 |
| ACTR3    | 0,507442398  | 8,551840482 | 3,24367E-08 | 1,15986E-07 |
| PHTF2    | 0,586781974  | 5,583665395 | 3,28377E-08 | 1,17335E-07 |
| RPL39    | 1,000822362  | 10,23483405 | 3,28482E-08 | 1,17335E-07 |
| COX6B1   | 0,914374844  | 7,875147453 | 3,29892E-08 | 1,17777E-07 |
| SWAP70   | -0,576737316 | 7,042394776 | 3,33584E-08 | 1,19033E-07 |
| ZNFX1    | -0,553784946 | 7,158875003 | 3,34477E-08 | 1,19289E-07 |
| CBFB     | 0,361192085  | 6,357832715 | 3,37187E-08 | 1,20192E-07 |
| LUZP1    | -0,596628308 | 5,872699803 | 3,42367E-08 | 1,21975E-07 |
| BRMS1    | 0,466496289  | 6,015916591 | 3,48519E-08 | 1,24102E-07 |
| COX5B    | 0,825745031  | 7,164932625 | 3,51737E-08 | 1,25182E-07 |
| RASSF5   | -0,735226568 | 6,217579231 | 3,5956E-08  | 1,279E-07   |
| ZFPL1    | 0,432765789  | 5,382463585 | 3,62603E-08 | 1,28915E-07 |
| SYVN1    | 0,520060143  | 6,968674093 | 3,64246E-08 | 1,29432E-07 |
| UTP15    | 0,42799506   | 4,147825919 | 3,69208E-08 | 1,31126E-07 |
| MYO1E    | 0,852664638  | 6,542204278 | 3,74263E-08 | 1,32853E-07 |
| TIGD2    | 0,812717717  | 3,624756438 | 3,83019E-08 | 1,3589E-07  |
| SNX29    | -0,57066007  | 5,488117397 | 3,86015E-08 | 1,36882E-07 |
| NAE1     | 0,441587659  | 5,742298881 | 3,90666E-08 | 1,38459E-07 |
| PSMC2    | 0,530658397  | 7,0272188   | 3,91967E-08 | 1,38848E-07 |
| TMSB10   | 0,932528912  | 11,12448912 | 3,96333E-08 | 1,40322E-07 |
| RAB2A    | 0,407877853  | 6,676147168 | 4,032E-08   | 1,42679E-07 |
| HMG20A   | -0,319942442 | 5,597759419 | 4,04344E-08 | 1,43009E-07 |
| ZRSR2    | -0,546065256 | 4,033146607 | 4,25115E-08 | 1,50278E-07 |
| TIPIN    | 0,574422194  | 2,747629881 | 4,28695E-08 | 1,51465E-07 |
| LRIG1    | -0,727335223 | 7,042419567 | 4,4367E-08  | 1,56674E-07 |
| TMEM14B  | 0,823493619  | 6,926595306 | 4,44952E-08 | 1,57046E-07 |
| PGS1     | -0,480659145 | 5,524407888 | 4,45356E-08 | 1,57066E-07 |
| UBE2Q1   | 0,426491813  | 7,233948324 | 4,45469E-08 | 1,57066E-07 |
| UQCRQ    | 0,865741149  | 7,161039504 | 4,52664E-08 | 1,5952E-07  |
| NUP43    | 0,418353388  | 5,495736084 | 4,53131E-08 | 1,59602E-07 |
| ACP1     | 0,482015962  | 6,895567385 | 4,60035E-08 | 1,6195E-07  |
| MTG1     | 0,597460576  | 5,023302033 | 4,6142E-08  | 1,62354E-07 |
| AKTIP    | -0,485726296 | 5,57370469  | 4,66909E-08 | 1,64201E-07 |
| SDF2     | 0,575182336  | 6,202889368 | 4,68094E-08 | 1,64533E-07 |
| PSMD8    | 0,59956485   | 7,833506902 | 4,68735E-08 | 1,64673E-07 |
| NAA15    | 0,480395101  | 6,18122273  | 4,71748E-08 | 1,65646E-07 |
| ATP6V0D1 | -0,485126071 | 7,544014118 | 4,74548E-08 | 1,66544E-07 |
| TBL1XR1  | 0,439123525  | 7,587498968 | 4,86931E-08 | 1,70801E-07 |
| UTP18    | 0,44344851   | 5,788903663 | 4,92258E-08 | 1,72581E-07 |

|          |              |             |             |             |
|----------|--------------|-------------|-------------|-------------|
| FBXL5    | -0,556494931 | 7,453012968 | 4,96237E-08 | 1,73887E-07 |
| SDAD1    | 0,357677448  | 5,929966728 | 5,08081E-08 | 1,77946E-07 |
| EIF2B4   | 0,339773465  | 5,58327183  | 5,09551E-08 | 1,78369E-07 |
| CHMP4B   | 0,427269261  | 8,09832188  | 5,13569E-08 | 1,79683E-07 |
| KPNA5    | -0,658507515 | 2,595896387 | 5,14806E-08 | 1,79933E-07 |
| FN3KRP   | 0,497815566  | 5,939370739 | 5,1481E-08  | 1,79933E-07 |
| NDUFS2   | 0,480355421  | 7,066011442 | 5,2782E-08  | 1,84385E-07 |
| DDX49    | 0,539834809  | 5,693917045 | 5,32404E-08 | 1,85892E-07 |
| CHORDC1  | 0,573963922  | 4,908671202 | 5,3864E-08  | 1,87973E-07 |
| TMEM214  | 0,439130764  | 7,380391108 | 5,4907E-08  | 1,91515E-07 |
| ISOC2    | 0,656199667  | 5,82460213  | 5,50555E-08 | 1,91934E-07 |
| FEM1B    | -0,394059694 | 6,619264081 | 5,67319E-08 | 1,97678E-07 |
| RDBP     | 0,548201383  | 6,789757119 | 5,69231E-08 | 1,98242E-07 |
| RNF2     | 0,497409379  | 5,236352706 | 5,697E-08   | 1,98304E-07 |
| CECR5    | 0,550394787  | 5,389210812 | 5,81876E-08 | 2,02439E-07 |
| ADSL     | 0,603478301  | 6,171688555 | 5,95464E-08 | 2,07061E-07 |
| SLC39A14 | 0,954084258  | 6,298572385 | 5,96431E-08 | 2,07292E-07 |
| RAB21    | -0,408979283 | 6,264705027 | 5,98373E-08 | 2,07861E-07 |
| LYRM7    | -0,403182901 | 4,914886621 | 6,00154E-08 | 2,08373E-07 |
| FAM168B  | -0,505244428 | 7,247500438 | 6,05696E-08 | 2,1019E-07  |
| CTPS2    | 0,536821988  | 5,344382207 | 6,07637E-08 | 2,10757E-07 |
| PSD3     | 0,767906049  | 5,6606414   | 6,09045E-08 | 2,11138E-07 |
| HDHD2    | -0,506608759 | 5,344967004 | 6,15397E-08 | 2,13231E-07 |
| TOMM6    | 0,662537202  | 6,967414917 | 6,22133E-08 | 2,15456E-07 |
| AXL      | -0,823447511 | 6,738484135 | 6,31623E-08 | 2,18631E-07 |
| CCDC138  | 0,814297986  | 2,382121366 | 6,34606E-08 | 2,19552E-07 |
| CDK2AP1  | 0,581086895  | 7,229475613 | 6,42147E-08 | 2,22049E-07 |
| MARCH6   | 0,618746479  | 7,199453768 | 6,45695E-08 | 2,23162E-07 |
| RPL38    | 0,677766025  | 8,943185896 | 6,54463E-08 | 2,26078E-07 |
| SP2      | -0,418647389 | 5,295901252 | 6,60038E-08 | 2,27889E-07 |
| NR2F1    | -0,890567737 | 5,003459201 | 6,79165E-08 | 2,34374E-07 |
| COX5A    | 0,631663831  | 6,765929158 | 6,80674E-08 | 2,3472E-07  |
| COL18A1  | 0,958876758  | 8,042346053 | 6,80856E-08 | 2,3472E-07  |
| RFNG     | 0,471092459  | 5,694468319 | 6,83389E-08 | 2,35474E-07 |
| FCER1G   | -0,902648125 | 6,740243348 | 7,04211E-08 | 2,42526E-07 |
| CSNK2A1  | 0,503767764  | 6,652348443 | 7,19092E-08 | 2,47526E-07 |
| TET1     | 1,046842356  | 1,670242295 | 7,26998E-08 | 2,50121E-07 |
| UBXN4    | 0,352133238  | 7,808274617 | 7,3439E-08  | 2,52537E-07 |
| RBM6     | -0,567127195 | 6,1650328   | 7,56706E-08 | 2,6008E-07  |
| RPL23A   | 0,521661443  | 10,16169657 | 7,71042E-08 | 2,64873E-07 |
| TRAPPC10 | -0,410483094 | 6,160380047 | 7,7663E-08  | 2,66659E-07 |
| SCYL1    | 0,369922269  | 7,048310707 | 7,90461E-08 | 2,71271E-07 |
| ZNF408   | 0,415399948  | 4,098565718 | 7,99242E-08 | 2,74147E-07 |
| AHSA1    | 0,449342649  | 6,970584009 | 8,02045E-08 | 2,74969E-07 |
| FAM190B  | -0,481983596 | 6,390271667 | 8,03344E-08 | 2,75276E-07 |
| COX6A1   | 0,809709997  | 8,165445632 | 8,04184E-08 | 2,75426E-07 |
| CCAR1    | 0,389460659  | 6,312269965 | 8,06981E-08 | 2,76245E-07 |
| UBE2F    | 0,510154394  | 5,730843755 | 8,15406E-08 | 2,78989E-07 |
| SYDE1    | -0,725230082 | 4,367480065 | 8,29756E-08 | 2,83757E-07 |
| ANXA6    | -0,598186493 | 7,611220451 | 8,38351E-08 | 2,86552E-07 |

|          |              |             |             |             |
|----------|--------------|-------------|-------------|-------------|
| NR2C1    | -0,456040697 | 4,745839631 | 8,53787E-08 | 2,91682E-07 |
| DDX55    | 0,502369874  | 4,94863986  | 8,54987E-08 | 2,91946E-07 |
| EXOG     | -0,378209904 | 3,219940881 | 8,58481E-08 | 2,92992E-07 |
| PRMT1    | 0,499641491  | 7,229291802 | 8,64739E-08 | 2,9498E-07  |
| SLC25A36 | -0,481596456 | 6,391478638 | 8,738E-08   | 2,97922E-07 |
| UBE2K    | 0,382225894  | 7,0894903   | 8,76516E-08 | 2,98699E-07 |
| POLR2G   | 0,614874595  | 6,231684305 | 8,96651E-08 | 3,05408E-07 |
| PHF23    | 0,427888007  | 5,638689228 | 9,00059E-08 | 3,06416E-07 |
| FAM100B  | 0,651264927  | 6,382419377 | 9,00811E-08 | 3,06518E-07 |
| AP4E1    | -0,347898245 | 4,516825868 | 9,03456E-08 | 3,07265E-07 |
| SHISA4   | 0,689905005  | 4,689384155 | 9,06509E-08 | 3,0815E-07  |
| PAR-SN   | -0,742161366 | 3,698538446 | 9,14616E-08 | 3,10751E-07 |
| CHD9     | -0,550548167 | 5,894858422 | 9,3412E-08  | 3,17219E-07 |
| BCL6     | -0,615748361 | 6,693705229 | 9,36624E-08 | 3,17911E-07 |
| GAS5     | 1,158002771  | 8,23017022  | 9,528E-08   | 3,23241E-07 |
| ITPA     | 0,514111183  | 5,734767615 | 9,57593E-08 | 3,24705E-07 |
| TRMT5    | 0,460537776  | 4,887998004 | 9,65755E-08 | 3,2731E-07  |
| TYSND1   | 0,591395716  | 5,008840418 | 9,66621E-08 | 3,27441E-07 |
| SNHG4    | 0,803284139  | 0,548527747 | 9,69849E-08 | 3,28371E-07 |
| IRF3     | 0,44264245   | 6,235166949 | 9,73964E-08 | 3,29601E-07 |
| MAML2    | -0,838860025 | 4,86250421  | 9,77022E-08 | 3,30472E-07 |
| TINF2    | -0,397628005 | 6,442834102 | 9,92405E-08 | 3,35509E-07 |
| ZXDC     | -0,428390259 | 6,197352132 | 9,95027E-08 | 3,36229E-07 |
| TKT      | 0,746815887  | 9,449246254 | 9,98779E-08 | 3,37329E-07 |
| NOMO2    | 0,530935853  | 7,761259092 | 1,0716E-07  | 3,61746E-07 |
| CPEB4    | -0,59834951  | 6,204993824 | 1,07403E-07 | 3,62385E-07 |
| EIF2S3   | 0,675153247  | 8,607729955 | 1,07921E-07 | 3,63952E-07 |
| EPN2     | -0,506248481 | 6,107200724 | 1,08105E-07 | 3,64393E-07 |
| MYD88    | -0,470703744 | 6,815779701 | 1,08844E-07 | 3,66702E-07 |
| CTSA     | 0,618900711  | 8,549144477 | 1,09418E-07 | 3,68456E-07 |
| WDR48    | -0,352841561 | 5,764246954 | 1,12826E-07 | 3,79745E-07 |
| SSH1     | -0,578621068 | 6,472853723 | 1,1298E-07  | 3,80074E-07 |
| SMG5     | 0,529901429  | 7,396312872 | 1,13576E-07 | 3,8189E-07  |
| IFT57    | -0,940673789 | 7,41010372  | 1,1376E-07  | 3,82322E-07 |
| NPAS2    | 1,110249725  | 4,991735549 | 1,15351E-07 | 3,87476E-07 |
| SMAD4    | -0,465925241 | 6,725304071 | 1,16651E-07 | 3,91652E-07 |
| HSPB1    | 0,861615763  | 9,228171507 | 1,17375E-07 | 3,93887E-07 |
| GPR180   | 0,715161541  | 4,647894992 | 1,19596E-07 | 4,01145E-07 |
| NUP107   | 0,964769987  | 6,032527121 | 1,19772E-07 | 4,01536E-07 |
| HSPA9    | 0,476778853  | 8,35487324  | 1,2041E-07  | 4,03477E-07 |
| FAM91A1  | 0,434270438  | 6,608577875 | 1,20629E-07 | 4,04011E-07 |
| PSMG1    | 0,731454588  | 4,942965415 | 1,22834E-07 | 4,11195E-07 |
| AES      | -0,475973858 | 8,98357332  | 1,23196E-07 | 4,12203E-07 |
| PIP5K1C  | -0,461930169 | 6,165569099 | 1,23771E-07 | 4,13925E-07 |
| MAP7D1   | -0,52848332  | 7,319803013 | 1,23968E-07 | 4,1438E-07  |
| UBA2     | 0,627053591  | 7,439702509 | 1,24423E-07 | 4,15698E-07 |
| EXOSC3   | 0,528837439  | 4,38210537  | 1,24933E-07 | 4,17198E-07 |
| CBR3     | 1,434477588  | 3,883994127 | 1,26E-07    | 4,20554E-07 |
| GNPDA1   | 0,589750984  | 6,226143288 | 1,26321E-07 | 4,21421E-07 |
| CHI3L1   | 1,945789281  | 8,1494477   | 1,26921E-07 | 4,23213E-07 |

|           |              |             |             |             |
|-----------|--------------|-------------|-------------|-------------|
| NAA38     | 0,433714782  | 4,794581022 | 1,27125E-07 | 4,23689E-07 |
| HSD3B7    | 0,837285444  | 5,828479726 | 1,28616E-07 | 4,28448E-07 |
| ABI3      | -0,713690066 | 4,585149805 | 1,28962E-07 | 4,29389E-07 |
| IFNGR1    | -0,713962067 | 7,849987527 | 1,29055E-07 | 4,29492E-07 |
| UBAP2L    | 0,453457299  | 7,845383251 | 1,29385E-07 | 4,30378E-07 |
| RBM8A     | 0,449237031  | 7,239393705 | 1,29805E-07 | 4,31566E-07 |
| DDR1      | 0,736293094  | 8,577914979 | 1,30736E-07 | 4,34399E-07 |
| CLIC1     | 0,653098493  | 9,369548214 | 1,30785E-07 | 4,34399E-07 |
| GSR       | 0,927535381  | 6,819898685 | 1,31466E-07 | 4,36448E-07 |
| AMMECR1   | 0,512583143  | 4,716915142 | 1,31643E-07 | 4,36824E-07 |
| TMEM67    | -0,665562492 | 4,111055298 | 1,32E-07    | 4,37687E-07 |
| H3F3A     | 0,553943085  | 9,909979879 | 1,32031E-07 | 4,37687E-07 |
| LRIG3     | 1,325380839  | 6,31144476  | 1,32344E-07 | 4,38512E-07 |
| RPL30     | 0,608120437  | 10,08893043 | 1,32915E-07 | 4,40187E-07 |
| TNFRSF10D | -0,919129795 | 4,375625762 | 1,3301E-07  | 4,40288E-07 |
| RSBN1     | -0,436541879 | 5,262969621 | 1,33135E-07 | 4,40489E-07 |
| DCLRE1A   | 0,635841085  | 4,634319215 | 1,33436E-07 | 4,41271E-07 |
| MBNL2     | -0,523474297 | 6,828528382 | 1,33592E-07 | 4,41572E-07 |
| ENY2      | 0,544059249  | 5,751919634 | 1,33952E-07 | 4,42549E-07 |
| MGST1     | 0,898294244  | 8,603252803 | 1,34733E-07 | 4,44912E-07 |
| SLC39A1   | 0,477818462  | 8,078151276 | 1,34912E-07 | 4,45288E-07 |
| XRCC4     | 0,736822371  | 3,895237473 | 1,35649E-07 | 4,47503E-07 |
| DYRK1A    | -0,400157219 | 6,545201392 | 1,35854E-07 | 4,47962E-07 |
| NOLC1     | 0,520028227  | 7,253090849 | 1,38086E-07 | 4,55103E-07 |
| RPS19     | 0,773545954  | 10,08112865 | 1,38621E-07 | 4,56647E-07 |
| CEP76     | 0,549819301  | 3,257135515 | 1,40121E-07 | 4,61365E-07 |
| EIF3H     | 0,473260581  | 8,363387416 | 1,40713E-07 | 4,63088E-07 |
| ATP1B1    | 1,027878619  | 9,495056784 | 1,4122E-07  | 4,64533E-07 |
| IMPDH2    | 0,534983203  | 7,434134342 | 1,43743E-07 | 4,72606E-07 |
| LEF1      | 0,800025178  | 3,609558225 | 1,45665E-07 | 4,78695E-07 |
| ABCA5     | -0,746886841 | 4,273211148 | 1,46841E-07 | 4,82327E-07 |
| KRT19     | 1,173242818  | 9,357468546 | 1,47527E-07 | 4,84345E-07 |
| ARF4      | 0,502151325  | 8,579961084 | 1,48498E-07 | 4,873E-07   |
| PLXNB1    | -0,781584731 | 6,589696518 | 1,49387E-07 | 4,89981E-07 |
| SLC25A20  | -0,524096509 | 4,787595673 | 1,49963E-07 | 4,91635E-07 |
| TNC       | 1,600223251  | 8,68796463  | 1,51418E-07 | 4,96164E-07 |
| ABHD13    | -0,428918005 | 5,218523909 | 1,53361E-07 | 5,02291E-07 |
| DUSP12    | 0,507612858  | 4,433032037 | 1,54938E-07 | 5,07213E-07 |
| TRIB1     | -0,747475551 | 7,47004081  | 1,55778E-07 | 5,09708E-07 |
| TAF3      | -0,480549366 | 3,825730971 | 1,55901E-07 | 5,09708E-07 |
| ZFYVE26   | -0,543482102 | 5,827381865 | 1,55925E-07 | 5,09708E-07 |
| NSMCE2    | 0,736841346  | 4,969017401 | 1,56966E-07 | 5,12866E-07 |
| YIF1B     | 0,559263174  | 5,88532481  | 1,57979E-07 | 5,1593E-07  |
| AATF      | 0,503342322  | 6,433692818 | 1,58244E-07 | 5,16546E-07 |
| SYAP1     | 0,576701553  | 6,429630575 | 1,58584E-07 | 5,17408E-07 |
| CEPT1     | -0,436070986 | 5,429660558 | 1,60073E-07 | 5,22017E-07 |
| FBXO28    | 0,408050975  | 6,320448853 | 1,60584E-07 | 5,23433E-07 |
| SLC35B3   | 0,450035598  | 5,192749916 | 1,61804E-07 | 5,27157E-07 |
| TRMT112   | 0,621209123  | 7,570077303 | 1,63024E-07 | 5,30878E-07 |
| PBRM1     | -0,449114013 | 6,317427681 | 1,63877E-07 | 5,33403E-07 |

|           |              |             |             |             |
|-----------|--------------|-------------|-------------|-------------|
| UBE2V2    | 0,515560495  | 5,847145665 | 1,64353E-07 | 5,34696E-07 |
| ARHGEF12  | -0,56083295  | 8,117392686 | 1,67354E-07 | 5,44199E-07 |
| C10orf88  | 0,433685782  | 3,718697095 | 1,69009E-07 | 5,4932E-07  |
| PLCD1     | -0,659689028 | 4,720050904 | 1,69431E-07 | 5,50428E-07 |
| PA2G4P4   | 0,719791215  | 0,70052659  | 1,70468E-07 | 5,53431E-07 |
| SDHA      | 0,554245326  | 7,437639946 | 1,70518E-07 | 5,53431E-07 |
| SDC1      | 0,771054261  | 9,70581218  | 1,72624E-07 | 5,60001E-07 |
| YEATS4    | 1,264141228  | 5,215744476 | 1,75767E-07 | 5,69928E-07 |
| TSC22D3   | -0,868664938 | 8,542980584 | 1,7883E-07  | 5,79583E-07 |
| ZNF592    | -0,541090263 | 6,050076592 | 1,82934E-07 | 5,92383E-07 |
| TADA2B    | -0,312161168 | 5,749171009 | 1,82953E-07 | 5,92383E-07 |
| HIAT1     | -0,373122716 | 6,415482421 | 1,83699E-07 | 5,94517E-07 |
| TSN       | 0,51078957   | 7,06741136  | 1,84022E-07 | 5,95278E-07 |
| HCCS      | 0,415144318  | 5,085295931 | 1,85742E-07 | 6,00556E-07 |
| UNC119B   | -0,693390217 | 5,947186386 | 1,86677E-07 | 6,03293E-07 |
| FMNL3     | -0,536617933 | 6,088359485 | 1,8774E-07  | 6,06442E-07 |
| CDC5L     | 0,388557197  | 6,170164561 | 1,88633E-07 | 6,09037E-07 |
| CPSF6     | 0,426000155  | 6,651400415 | 1,89394E-07 | 6,11012E-07 |
| APIP      | -0,565223901 | 5,025043034 | 1,89424E-07 | 6,11012E-07 |
| RBBP4     | 0,381166203  | 8,016931585 | 1,92206E-07 | 6,19694E-07 |
| GNPTAB    | -0,464633099 | 6,928687536 | 1,93354E-07 | 6,23101E-07 |
| FSCN1     | 1,221586608  | 7,251348229 | 1,94279E-07 | 6,25787E-07 |
| LOC440173 | 1,664689047  | 1,505442652 | 1,95906E-07 | 6,30728E-07 |
| GPA1      | 0,517171563  | 7,385392824 | 1,97466E-07 | 6,35452E-07 |
| CEP68     | -0,430747145 | 5,339079547 | 1,97994E-07 | 6,36849E-07 |
| SLC43A2   | -0,590419202 | 6,165953693 | 2,00149E-07 | 6,43478E-07 |
| PPIC      | 0,540109738  | 6,190742597 | 2,02064E-07 | 6,49327E-07 |
| AAGAB     | 0,493309069  | 6,147225337 | 2,03758E-07 | 6,54464E-07 |
| TAF1A     | 0,447936792  | 3,25303389  | 2,07542E-07 | 6,66305E-07 |
| TRIM22    | -0,75430629  | 7,044264223 | 2,0801E-07  | 6,67492E-07 |
| DPM2      | 0,590019585  | 6,190541901 | 2,08451E-07 | 6,68594E-07 |
| PIM2      | 0,946086047  | 6,515306903 | 2,11352E-07 | 6,77578E-07 |
| C1orf43   | 0,655735091  | 8,764624406 | 2,14337E-07 | 6,86827E-07 |
| ACVR1B    | 0,717052502  | 6,514240837 | 2,15862E-07 | 6,91387E-07 |
| GLRX2     | 0,617184808  | 3,257563501 | 2,17135E-07 | 6,95139E-07 |
| RPS16     | 0,926631276  | 10,33909721 | 2,18505E-07 | 6,99164E-07 |
| STX3      | -0,499866946 | 6,392031353 | 2,18598E-07 | 6,99164E-07 |
| LSM7      | 0,676771477  | 5,358671955 | 2,21479E-07 | 7,08049E-07 |
| TMEM208   | 0,700832052  | 5,938788321 | 2,26946E-07 | 7,25184E-07 |
| SEC61A2   | 0,725019035  | 2,957656332 | 2,2879E-07  | 7,30734E-07 |
| SEPT9     | 0,491692285  | 8,78952533  | 2,29364E-07 | 7,32225E-07 |
| TRAF3IP2  | -0,513247638 | 5,101271993 | 2,29848E-07 | 7,33426E-07 |
| NDUFB9    | 0,770000013  | 7,674263314 | 2,34252E-07 | 7,47129E-07 |
| ZBTB7A    | -0,517180202 | 5,835661313 | 2,34856E-07 | 7,48706E-07 |
| EIF2B1    | 0,358323191  | 6,113383153 | 2,35572E-07 | 7,50639E-07 |
| SUPV3L1   | 0,378277855  | 4,904300353 | 2,4032E-07  | 7,65409E-07 |
| CDK8      | 0,630598323  | 3,695828782 | 2,42592E-07 | 7,72284E-07 |
| ATF7      | -0,401106785 | 6,419214047 | 2,43847E-07 | 7,75566E-07 |
| IFITM1    | 1,025841281  | 7,991231442 | 2,4385E-07  | 7,75566E-07 |
| ZNF548    | -0,442188405 | 4,188531267 | 2,49625E-07 | 7,93563E-07 |

|          |              |             |             |             |
|----------|--------------|-------------|-------------|-------------|
| XPO6     | 0,394633705  | 7,00575305  | 2,51721E-07 | 7,99853E-07 |
| SCRIB    | 0,676491361  | 6,838897763 | 2,51867E-07 | 7,99945E-07 |
| VPS13C   | -0,601617982 | 6,827207516 | 2,52718E-07 | 8,02274E-07 |
| RAD23B   | 0,372251094  | 8,057654521 | 2,6165E-07  | 8,30243E-07 |
| CTTN     | 0,49957301   | 8,367018607 | 2,62898E-07 | 8,33815E-07 |
| SDF4     | 0,433142567  | 7,770119997 | 2,66331E-07 | 8,4431E-07  |
| PTPRG    | -0,855545867 | 5,532681217 | 2,66676E-07 | 8,45009E-07 |
| DHX40    | 0,47827468   | 6,723769877 | 2,70828E-07 | 8,57768E-07 |
| TMED4    | 0,439295757  | 6,773830602 | 2,73464E-07 | 8,65716E-07 |
| VKORC1   | 0,631795364  | 6,6348155   | 2,746E-07   | 8,68907E-07 |
| SEC22B   | 0,453166939  | 7,01278444  | 2,77115E-07 | 8,7646E-07  |
| CUL4B    | 0,404731061  | 6,727830754 | 2,79086E-07 | 8,82283E-07 |
| CAPN7    | -0,340643265 | 5,403868885 | 2,8327E-07  | 8,95098E-07 |
| VBP1     | 0,592339206  | 6,242486208 | 2,83991E-07 | 8,96959E-07 |
| YRDC     | 0,527261983  | 5,041052095 | 2,85592E-07 | 9,01599E-07 |
| ALAS1    | -0,465434651 | 6,812658597 | 2,89629E-07 | 9,13918E-07 |
| ANAPC1   | 0,484202958  | 5,569196852 | 2,93885E-07 | 9,26921E-07 |
| NDUFAB2  | 0,661674215  | 4,557062137 | 2,94289E-07 | 9,27765E-07 |
| SYNE2    | -0,754476674 | 7,532687873 | 2,96645E-07 | 9,34762E-07 |
| PDXP     | 0,635111605  | 3,059223223 | 2,98338E-07 | 9,3966E-07  |
| CCM2     | 0,618885442  | 6,298221191 | 3,05991E-07 | 9,6332E-07  |
| UAP1     | 0,600982022  | 6,639850796 | 3,06296E-07 | 9,63836E-07 |
| USP8     | -0,381820379 | 6,284481486 | 3,11679E-07 | 9,80323E-07 |
| MLL5     | -0,482482315 | 6,818173514 | 3,19609E-07 | 1,0048E-06  |
| CCDC88A  | -0,642632141 | 5,856978108 | 3,21134E-07 | 1,00913E-06 |
| USP47    | -0,483256036 | 6,641194901 | 3,21975E-07 | 1,01131E-06 |
| PTGES3   | 0,46100005   | 8,934158362 | 3,26094E-07 | 1,02377E-06 |
| DRAM1    | -0,988726212 | 8,157552764 | 3,29964E-07 | 1,03523E-06 |
| CRLS1    | -0,609938577 | 6,873763353 | 3,30048E-07 | 1,03523E-06 |
| ERI2     | 0,446492459  | 4,519813802 | 3,34145E-07 | 1,0476E-06  |
| UBE2E2   | -0,596251662 | 5,028070319 | 3,40916E-07 | 1,06834E-06 |
| KTI12    | 0,457003874  | 3,961521227 | 3,45878E-07 | 1,08339E-06 |
| VPS35    | 0,344802006  | 7,600743134 | 3,46731E-07 | 1,08556E-06 |
| UTP3     | -0,393952833 | 5,490787553 | 3,50913E-07 | 1,09815E-06 |
| CPSF1    | 0,512478299  | 6,75637001  | 3,54542E-07 | 1,109E-06   |
| SEC23A   | 0,630529486  | 6,625547595 | 3,56057E-07 | 1,11323E-06 |
| NANOG    | -0,52600228  | 1,210638491 | 3,5832E-07  | 1,11972E-06 |
| SLC25A17 | 0,456188877  | 5,155191789 | 3,58461E-07 | 1,11972E-06 |
| SRXN1    | 1,334262198  | 7,25829471  | 3,58709E-07 | 1,11998E-06 |
| SNRNP40  | 0,444936306  | 5,836040008 | 3,6204E-07  | 1,12986E-06 |
| CDH1     | 0,841437038  | 9,175125548 | 3,64992E-07 | 1,13855E-06 |
| ARPC1A   | 0,617246556  | 7,778380865 | 3,65192E-07 | 1,13866E-06 |
| PABPC1L  | 1,125688014  | 4,250246343 | 3,67772E-07 | 1,14618E-06 |
| HIF1A    | 0,707385462  | 8,335011096 | 3,70156E-07 | 1,15308E-06 |
| MRPS2    | 0,526673005  | 5,635855835 | 3,7763E-07  | 1,17583E-06 |
| NCBP2    | 0,406798903  | 6,814331609 | 3,86333E-07 | 1,20184E-06 |
| LEO1     | 0,437542749  | 4,780572397 | 3,86339E-07 | 1,20184E-06 |
| TMEM9    | 0,684576001  | 7,647212763 | 3,87477E-07 | 1,20484E-06 |
| FAM20B   | -0,395535884 | 6,70946053  | 3,93078E-07 | 1,22169E-06 |
| ZC3H6    | -0,508665354 | 4,589484477 | 3,9488E-07  | 1,22674E-06 |

|          |              |             |             |             |
|----------|--------------|-------------|-------------|-------------|
| ZC3H7B   | -0,496749703 | 7,297270616 | 3,97522E-07 | 1,23438E-06 |
| GTF3C3   | 0,394701599  | 5,460963243 | 3,98061E-07 | 1,23549E-06 |
| PRPF38B  | -0,361598442 | 5,94204516  | 3,98707E-07 | 1,23694E-06 |
| ZNF212   | 0,462090627  | 4,52394242  | 4,05569E-07 | 1,25765E-06 |
| GTF3A    | 0,839121401  | 7,279891648 | 4,08835E-07 | 1,2672E-06  |
| AMPD2    | 0,42432184   | 5,671246518 | 4,13438E-07 | 1,28089E-06 |
| TXNDC12  | 0,486325687  | 7,063667124 | 4,15304E-07 | 1,28609E-06 |
| AQP1     | -1,396615895 | 10,14713981 | 4,17682E-07 | 1,29277E-06 |
| VDAC3    | 0,646924933  | 7,026312503 | 4,17841E-07 | 1,29277E-06 |
| HSPA4    | 0,405891455  | 7,206068565 | 4,19358E-07 | 1,29646E-06 |
| PHF10    | -0,470872417 | 6,286315495 | 4,19415E-07 | 1,29646E-06 |
| EEA1     | -0,474699898 | 5,595520865 | 4,19688E-07 | 1,29672E-06 |
| WDR34    | 0,611701689  | 6,635853182 | 4,22797E-07 | 1,30573E-06 |
| EHMT2    | 0,547026931  | 6,411747651 | 4,26946E-07 | 1,31795E-06 |
| LGALS3BP | 0,752660321  | 10,56238999 | 4,28813E-07 | 1,32311E-06 |
| PLTP     | 0,996294332  | 7,822743645 | 4,30887E-07 | 1,32891E-06 |
| NICN1    | -0,532324361 | 4,62071381  | 4,32007E-07 | 1,33176E-06 |
| ATP5G2   | 0,564510957  | 8,416988632 | 4,38123E-07 | 1,35001E-06 |
| KIAA0391 | 0,75258246   | 6,87761046  | 4,47122E-07 | 1,37711E-06 |
| NDUFA12  | 0,520173663  | 5,773757232 | 4,4961E-07  | 1,38415E-06 |
| MAPK1    | -0,359627187 | 7,641966851 | 4,50661E-07 | 1,38676E-06 |
| ORMDL2   | 0,63467058   | 6,084654386 | 4,53263E-07 | 1,39414E-06 |
| ASPH     | 1,093327506  | 9,122615549 | 4,54595E-07 | 1,3976E-06  |
| ATXN1    | -0,462299129 | 6,137980847 | 4,58451E-07 | 1,40882E-06 |
| PRMT2    | -0,388820992 | 6,888835911 | 4,58961E-07 | 1,40975E-06 |
| VRK1     | 0,704059166  | 4,237379891 | 4,62635E-07 | 1,41996E-06 |
| SPATS2L  | 0,62081002   | 7,633303058 | 4,62701E-07 | 1,41996E-06 |
| RABGAP1L | -0,438428627 | 5,047421332 | 4,66333E-07 | 1,43046E-06 |
| PRRC1    | 0,4119478    | 6,931024634 | 4,68898E-07 | 1,43769E-06 |
| ASAP3    | -0,703731833 | 5,408274509 | 4,76284E-07 | 1,45968E-06 |
| PIP4K2C  | 0,67682759   | 6,823751678 | 4,77228E-07 | 1,46191E-06 |
| DDX27    | 0,518780608  | 6,41263137  | 4,78886E-07 | 1,46633E-06 |
| HLX      | -0,973421972 | 4,161850389 | 4,794E-07   | 1,46725E-06 |
| KIF3A    | -0,465808731 | 5,051751995 | 4,79849E-07 | 1,46796E-06 |
| TMEM63B  | -0,607291958 | 7,271616738 | 4,80394E-07 | 1,46897E-06 |
| HDAC5    | -0,436534703 | 6,458562162 | 4,80982E-07 | 1,47011E-06 |
| PGM1     | -0,567835676 | 7,253491522 | 4,91158E-07 | 1,50054E-06 |
| ARIH2    | -0,315317261 | 6,361007224 | 4,98701E-07 | 1,5229E-06  |
| ABT1     | 0,498116149  | 5,777335602 | 4,99948E-07 | 1,52603E-06 |
| DGKA     | 0,782360218  | 5,101426921 | 5,04688E-07 | 1,53981E-06 |
| GSN      | -0,691746182 | 9,528613246 | 5,0573E-07  | 1,5423E-06  |
| PPP2R5E  | 0,467172183  | 5,90316506  | 5,08682E-07 | 1,55061E-06 |
| FYN      | -0,673766123 | 6,003605678 | 5,14347E-07 | 1,56717E-06 |
| MRPS14   | 0,489836566  | 4,800131232 | 5,24531E-07 | 1,59749E-06 |
| GAL3ST4  | 0,765140005  | 4,345369035 | 5,24879E-07 | 1,59784E-06 |
| SUB1     | 0,594956108  | 7,875219316 | 5,33353E-07 | 1,62291E-06 |
| IER3     | 1,05514879   | 7,099607228 | 5,38278E-07 | 1,63716E-06 |
| LITAF    | -0,465069171 | 8,47825938  | 5,40604E-07 | 1,6435E-06  |
| EIF3E    | 0,660727755  | 9,048817546 | 5,42493E-07 | 1,64851E-06 |
| RBM4     | 0,319063072  | 7,12994704  | 5,43695E-07 | 1,65143E-06 |

|          |              |             |             |             |
|----------|--------------|-------------|-------------|-------------|
| SLC26A2  | -0,767276025 | 5,811065003 | 5,50706E-07 | 1,67198E-06 |
| PLP2     | 0,826682657  | 7,704507162 | 5,51501E-07 | 1,67365E-06 |
| ARMC10   | 0,518508811  | 6,450584467 | 5,78609E-07 | 1,75513E-06 |
| MAEA     | 0,33046632   | 6,199737325 | 5,79476E-07 | 1,75698E-06 |
| C7orf43  | 0,516481816  | 4,594798418 | 5,8069E-07  | 1,75988E-06 |
| CISD1    | 0,536940506  | 5,032766438 | 5,87537E-07 | 1,77984E-06 |
| SLC7A6   | -0,495949457 | 5,973060482 | 5,89903E-07 | 1,78621E-06 |
| XRCC3    | 0,585561421  | 4,236436201 | 5,91835E-07 | 1,79127E-06 |
| EFNB1    | -0,873981819 | 5,865077756 | 5,99587E-07 | 1,81392E-06 |
| C16orf58 | 0,527697549  | 7,285971389 | 6,06098E-07 | 1,83281E-06 |
| MPPE1    | -0,435731071 | 5,945882813 | 6,20528E-07 | 1,87561E-06 |
| PAPD5    | -0,438718696 | 4,820480465 | 6,2248E-07  | 1,88068E-06 |
| NDUFAB1  | 0,546331953  | 6,163486563 | 6,30472E-07 | 1,90398E-06 |
| NUDT16   | -0,529783559 | 5,835422903 | 6,4366E-07  | 1,94295E-06 |
| ATL3     | 0,531035022  | 5,414743447 | 6,49603E-07 | 1,96002E-06 |
| LBR      | 0,493118079  | 6,545720811 | 6,58694E-07 | 1,98657E-06 |
| RANGAP1  | 0,49458387   | 6,912992485 | 6,62426E-07 | 1,99694E-06 |
| LDOC1    | 1,046440309  | 5,642277234 | 6,76614E-07 | 2,03881E-06 |
| POLDIP3  | -0,365089612 | 6,938409435 | 6,85957E-07 | 2,06569E-06 |
| NEK9     | -0,419905325 | 6,744038324 | 6,86139E-07 | 2,06569E-06 |
| CEBPD    | -0,769958189 | 7,29404594  | 6,95007E-07 | 2,09146E-06 |
| FAM127B  | 0,510497588  | 6,020566865 | 6,97419E-07 | 2,09779E-06 |
| SERPINB6 | -0,502825864 | 7,611655775 | 7,05095E-07 | 2,11995E-06 |
| DCAF4    | 0,516036843  | 4,275551359 | 7,10513E-07 | 2,1353E-06  |
| PSMA2    | 0,521529318  | 7,291984857 | 7,13608E-07 | 2,14365E-06 |
| PCGF5    | -0,453289681 | 6,684534046 | 7,16144E-07 | 2,15032E-06 |
| PRKCD    | -0,510388702 | 6,93872225  | 7,19549E-07 | 2,1596E-06  |
| DUSP16   | -0,578272342 | 6,677502875 | 7,24845E-07 | 2,17454E-06 |
| FBXO6    | 0,705376627  | 5,411795544 | 7,5402E-07  | 2,26107E-06 |
| EFNB2    | -0,875714212 | 6,658654559 | 7,56341E-07 | 2,26703E-06 |
| PES1     | 0,419790582  | 6,599196083 | 7,57058E-07 | 2,26818E-06 |
| TMEM115  | -0,349558081 | 6,051806    | 7,74124E-07 | 2,31829E-06 |
| ALAD     | -0,43529149  | 6,228125052 | 7,75405E-07 | 2,32111E-06 |
| TBCC     | 0,502615441  | 5,170229822 | 7,758E-07   | 2,32127E-06 |
| RRAGA    | -0,356903551 | 6,698600221 | 7,81403E-07 | 2,33701E-06 |
| DYNC1LI1 | -0,309740871 | 5,737585502 | 7,82101E-07 | 2,33807E-06 |
| MAPK6    | 0,616482103  | 6,415986935 | 7,88395E-07 | 2,35586E-06 |
| MRS2     | 0,566782005  | 5,951977887 | 7,9246E-07  | 2,36697E-06 |
| FBXL12   | -0,337231737 | 4,416761141 | 8,0816E-07  | 2,4128E-06  |
| POLI     | -0,468833386 | 4,71816416  | 8,10883E-07 | 2,41987E-06 |
| NKTR     | -0,658510294 | 6,217969306 | 8,20837E-07 | 2,44851E-06 |
| RPN1     | 0,412826672  | 9,147392448 | 8,25534E-07 | 2,46144E-06 |
| UFD1L    | 0,491926279  | 6,320039513 | 8,28466E-07 | 2,4691E-06  |
| WBP2     | -0,411516466 | 7,811895908 | 8,31676E-07 | 2,47759E-06 |
| CD47     | -0,604118923 | 8,631514143 | 8,32861E-07 | 2,48003E-06 |
| GMCL1    | 0,470605582  | 4,817656326 | 8,66771E-07 | 2,57988E-06 |
| AP1M1    | -0,385789915 | 6,152076076 | 8,68509E-07 | 2,58393E-06 |
| YWHAQ    | 0,51632021   | 8,960853655 | 8,69228E-07 | 2,58494E-06 |
| DNMT1    | 0,64266283   | 6,695295392 | 8,70631E-07 | 2,58798E-06 |
| LCLAT1   | 0,404411846  | 5,434103607 | 8,93514E-07 | 2,65485E-06 |



|          |              |             |             |             |
|----------|--------------|-------------|-------------|-------------|
| RAB5B    | -0,368331684 | 8,197518996 | 8,94156E-07 | 2,6556E-06  |
| PPP1R16A | 0,566348038  | 5,533511032 | 9,02963E-07 | 2,68059E-06 |
| TSC22D1  | -0,661782646 | 8,699474777 | 9,07468E-07 | 2,69279E-06 |
| ANKRD11  | -0,487403598 | 7,200921249 | 9,08369E-07 | 2,69429E-06 |
| GOLPH3   | 0,464378534  | 8,007525032 | 9,14017E-07 | 2,70986E-06 |
| RPL12    | 0,70864874   | 10,17208406 | 9,22872E-07 | 2,73492E-06 |
| MRFAP1   | -0,315018355 | 8,436764046 | 9,4142E-07  | 2,78868E-06 |
| APOC1    | -1,01643715  | 7,846975966 | 9,42514E-07 | 2,79071E-06 |
| CNOT6L   | -0,343566405 | 6,170034369 | 9,43389E-07 | 2,79209E-06 |
| PLEKHA2  | -0,534176495 | 6,267467465 | 9,48891E-07 | 2,80715E-06 |
| TMEM64   | -0,740204995 | 5,593061514 | 9,51429E-07 | 2,81344E-06 |
| CDV3     | -0,457645899 | 7,893486594 | 9,52846E-07 | 2,81641E-06 |
| PARK7    | 0,491285357  | 7,999981813 | 9,56025E-07 | 2,82458E-06 |
| FKBP2    | 0,590884566  | 6,539375454 | 9,57322E-07 | 2,82719E-06 |
| STX6     | 0,385113986  | 6,526086941 | 9,63201E-07 | 2,84332E-06 |
| AARS     | 0,492010215  | 7,726559496 | 9,82267E-07 | 2,89835E-06 |
| ASCC3    | 0,518741477  | 6,164619364 | 9,902E-07   | 2,91984E-06 |
| TEX10    | 0,47132258   | 4,691659306 | 9,90408E-07 | 2,91984E-06 |
| RP2      | -0,483159155 | 5,450765606 | 9,97282E-07 | 2,93884E-06 |
| IDH1     | 0,800243073  | 8,045763605 | 1,0031E-06  | 2,95472E-06 |
| RNF123   | -0,388009122 | 5,55701737  | 1,00803E-06 | 2,96793E-06 |
| DPH3     | -0,48721798  | 5,600028899 | 1,01091E-06 | 2,97514E-06 |
| PNPT1    | 0,479165451  | 5,821337163 | 1,01663E-06 | 2,99068E-06 |
| HNRNPF   | 0,354474761  | 8,368098898 | 1,02254E-06 | 3,00676E-06 |
| NT5DC2   | 0,643337136  | 6,227744867 | 1,03176E-06 | 3,03256E-06 |
| TTC27    | 0,402562905  | 4,782713848 | 1,03765E-06 | 3,04858E-06 |
| PLXDC2   | -0,684825624 | 5,472199966 | 1,03941E-06 | 3,05242E-06 |
| COPE     | 0,504426888  | 7,439875474 | 1,04147E-06 | 3,05715E-06 |
| KRT17    | 2,179358466  | 6,9272729   | 1,04436E-06 | 3,06432E-06 |
| ACVR1    | 0,426085253  | 6,201867588 | 1,04632E-06 | 3,06874E-06 |
| ELF1     | -0,392777869 | 6,812930484 | 1,05158E-06 | 3,08286E-06 |
| IGFBP2   | 1,570515736  | 7,969147108 | 1,05362E-06 | 3,08752E-06 |
| ANKIB1   | 0,416948664  | 6,418577766 | 1,06766E-06 | 3,12731E-06 |
| MRPL22   | 0,57248271   | 5,010070294 | 1,06898E-06 | 3,12982E-06 |
| DCHS1    | -0,870493439 | 5,699490102 | 1,07255E-06 | 3,13893E-06 |
| RPS5     | 0,896622211  | 9,950369858 | 1,07505E-06 | 3,14489E-06 |
| ZNF468   | 0,585208688  | 5,007378021 | 1,08542E-06 | 3,17386E-06 |
| ZNF131   | 0,451024703  | 5,193915682 | 1,08742E-06 | 3,17837E-06 |
| SLC30A1  | 0,687902364  | 4,720024881 | 1,08885E-06 | 3,18118E-06 |
| GNL2     | 0,423712176  | 6,40570972  | 1,10516E-06 | 3,22744E-06 |
| TSR1     | 0,39195854   | 6,017167758 | 1,12054E-06 | 3,27097E-06 |
| PRPF40A  | 0,304335947  | 7,238754136 | 1,1394E-06  | 3,32459E-06 |
| ENAH     | 0,527084807  | 7,691750235 | 1,14275E-06 | 3,33293E-06 |
| MLLT10   | -0,41388662  | 5,313813707 | 1,15251E-06 | 3,35998E-06 |
| FAM188A  | -0,464726979 | 4,861197917 | 1,15703E-06 | 3,37171E-06 |
| GOLIM4   | -0,590583229 | 5,996167198 | 1,16826E-06 | 3,40299E-06 |
| TGFB2    | -1,064949776 | 5,301675429 | 1,17691E-06 | 3,42672E-06 |
| RPF2     | 0,493614992  | 4,553318972 | 1,20173E-06 | 3,49748E-06 |
| RNF20    | -0,367815964 | 6,09842015  | 1,2051E-06  | 3,50579E-06 |
| H19      | 2,915645225  | 9,022136335 | 1,20827E-06 | 3,51352E-06 |

|          |              |             |             |             |
|----------|--------------|-------------|-------------|-------------|
| DHR SX   | 0,531068279  | 5,129495317 | 1,21422E-06 | 3,52931E-06 |
| GLUL     | -0,565439784 | 10,19095497 | 1,22461E-06 | 3,558E-06   |
| ZNF7     | 0,375026191  | 5,024650788 | 1,26354E-06 | 3,66954E-06 |
| NR4A2    | -1,142832678 | 5,552352439 | 1,26813E-06 | 3,68131E-06 |
| ERCC2    | 0,508964164  | 4,852438632 | 1,27218E-06 | 3,6915E-06  |
| YWHAG    | 0,481968374  | 8,346044044 | 1,29443E-06 | 3,75446E-06 |
| C11orf31 | 0,64416643   | 6,709006976 | 1,32612E-06 | 3,84474E-06 |
| CHCHD10  | 0,770365011  | 5,215818868 | 1,3337E-06  | 3,86507E-06 |
| LSM1     | 0,76008805   | 5,517821105 | 1,34699E-06 | 3,90191E-06 |
| CDK2     | 0,528824073  | 5,582506615 | 1,35217E-06 | 3,91527E-06 |
| COMMD5   | 0,566338902  | 5,532208698 | 1,35346E-06 | 3,91733E-06 |
| GAS2L1   | -0,534615607 | 5,124750135 | 1,3668E-06  | 3,95287E-06 |
| ID2      | -0,740550664 | 6,336967619 | 1,3669E-06  | 3,95287E-06 |
| SGMS1    | -0,653441081 | 6,198322036 | 1,36807E-06 | 3,95459E-06 |
| CLSTN3   | 0,558584009  | 6,636642779 | 1,37279E-06 | 3,96653E-06 |
| OSGIN2   | -0,605333007 | 5,947920217 | 1,37366E-06 | 3,96737E-06 |
| IL6ST    | -0,83028582  | 6,575552555 | 1,38377E-06 | 3,99488E-06 |
| PEF1     | -0,379595894 | 6,871740796 | 1,38639E-06 | 3,99925E-06 |
| PLEKHB2  | -0,378952689 | 7,944577086 | 1,38645E-06 | 3,99925E-06 |
| RAB10    | 0,424377679  | 8,01393268  | 1,39712E-06 | 4,02832E-06 |
| PIH1D1   | 0,378512565  | 6,032362163 | 1,40009E-06 | 4,03518E-06 |
| IRF1     | -0,684573673 | 7,196477353 | 1,41638E-06 | 4,08041E-06 |
| RPS21    | 0,895005462  | 9,270064386 | 1,41964E-06 | 4,08805E-06 |
| MRPS11   | 0,525029957  | 5,115204248 | 1,43847E-06 | 4,14052E-06 |
| NAV1     | 0,734169096  | 6,224761934 | 1,43958E-06 | 4,14199E-06 |
| STAT1    | 0,758220188  | 9,015973602 | 1,44161E-06 | 4,14608E-06 |
| EEF1B2   | 0,778955713  | 9,312202275 | 1,4616E-06  | 4,20179E-06 |
| EIF3M    | 0,404227613  | 7,288005994 | 1,47025E-06 | 4,22488E-06 |
| NMD3     | 0,476338977  | 6,40202873  | 1,47112E-06 | 4,2256E-06  |
| RHBDD2   | -0,443576638 | 7,457091963 | 1,48993E-06 | 4,27781E-06 |
| NFE2L2   | -0,499836194 | 7,65214751  | 1,49262E-06 | 4,28373E-06 |
| COX18    | 0,475859782  | 5,33680428  | 1,49594E-06 | 4,29148E-06 |
| RALGDS   | -0,508587849 | 6,727209367 | 1,50946E-06 | 4,32844E-06 |
| SPCS2    | 0,445123361  | 7,032580184 | 1,51753E-06 | 4,34973E-06 |
| SHPRH    | -0,465126622 | 4,217839472 | 1,55255E-06 | 4,44824E-06 |
| DDX24    | -0,369531275 | 7,636918424 | 1,5547E-06  | 4,45172E-06 |
| POLE     | 0,681762557  | 5,451909589 | 1,55507E-06 | 4,45172E-06 |
| NAF1     | -0,343285098 | 3,681641564 | 1,56582E-06 | 4,48061E-06 |
| PARP2    | 0,487032067  | 4,691554    | 1,56822E-06 | 4,48561E-06 |
| TXN      | 0,863991399  | 8,21727669  | 1,57146E-06 | 4,49301E-06 |
| SNHG6    | 0,760523518  | 6,189772886 | 1,61637E-06 | 4,61946E-06 |
| ANKRD28  | -0,447113993 | 6,324942078 | 1,61914E-06 | 4,62545E-06 |
| COX6C    | 0,575010237  | 7,067106497 | 1,66337E-06 | 4,74981E-06 |
| PARVB    | -0,565878939 | 5,171267447 | 1,68683E-06 | 4,81477E-06 |
| DNM1     | 0,810066116  | 3,964091446 | 1,69931E-06 | 4,84837E-06 |
| RBM23    | -0,279598365 | 6,610083095 | 1,7021E-06  | 4,85428E-06 |
| CREB1    | -0,267637278 | 6,158354662 | 1,71203E-06 | 4,88058E-06 |
| RBM5     | -0,463785238 | 6,57455971  | 1,7214E-06  | 4,90522E-06 |
| TM9SF4   | 0,419589811  | 7,200764474 | 1,72262E-06 | 4,90667E-06 |
| G3BP1    | 0,396876248  | 7,138746076 | 1,73983E-06 | 4,95361E-06 |

|            |              |             |             |             |
|------------|--------------|-------------|-------------|-------------|
| PRKACA     | -0,323473729 | 6,688621267 | 1,74269E-06 | 4,95968E-06 |
| SF3B3      | 0,408521854  | 7,756410724 | 1,76301E-06 | 5,01542E-06 |
| KIAA0494   | -0,444660986 | 7,986025349 | 1,76416E-06 | 5,01661E-06 |
| E2F4       | 0,310883292  | 6,44427681  | 1,79883E-06 | 5,11305E-06 |
| S100A11    | 0,680579076  | 9,69843817  | 1,80517E-06 | 5,12893E-06 |
| C2orf43    | 0,449103568  | 4,730626309 | 1,80976E-06 | 5,13983E-06 |
| CCDC8      | -0,89221487  | 3,91507872  | 1,83757E-06 | 5,21665E-06 |
| PIKFYVE    | -0,42033196  | 5,591643394 | 1,85769E-06 | 5,27156E-06 |
| LIN37      | 0,629837015  | 3,650706501 | 1,86926E-06 | 5,30221E-06 |
| OAS3       | 0,818199272  | 7,412865893 | 1,88516E-06 | 5,34508E-06 |
| SEC11C     | 1,241776194  | 7,296470638 | 1,90078E-06 | 5,38712E-06 |
| AZIN1      | 0,504438761  | 8,144043663 | 1,90462E-06 | 5,39576E-06 |
| TRIM28     | 0,41750448   | 8,343897205 | 1,9148E-06  | 5,42235E-06 |
| CSGALNACT2 | -0,415349403 | 5,680802502 | 1,96926E-06 | 5,57426E-06 |
| STEAP3     | 0,896665934  | 6,845305249 | 1,97995E-06 | 5,6022E-06  |
| PSMA7      | 0,583600689  | 7,962696765 | 1,9987E-06  | 5,65291E-06 |
| PTBP1      | 0,334550054  | 8,331896627 | 2,00525E-06 | 5,66906E-06 |
| CCS        | 0,389498507  | 5,181742649 | 2,0104E-06  | 5,68128E-06 |
| EMG1       | 0,732634827  | 5,893732609 | 2,01392E-06 | 5,68886E-06 |
| MEIS3P1    | -0,4863999   | 5,965583511 | 2,03525E-06 | 5,74629E-06 |
| ZBED4      | 0,442171111  | 5,423074096 | 2,03593E-06 | 5,74629E-06 |
| DHDDS      | 0,329779426  | 5,705955171 | 2,0641E-06  | 5,82337E-06 |
| ITFG3      | 0,487646694  | 7,121840534 | 2,07141E-06 | 5,84061E-06 |
| DSCR3      | -0,341607807 | 6,166555536 | 2,07192E-06 | 5,84061E-06 |
| FAM49B     | 0,573728373  | 6,979421394 | 2,1066E-06  | 5,9359E-06  |
| POLM       | 0,475868683  | 4,775568662 | 2,11753E-06 | 5,96423E-06 |
| OGDH       | -0,456129103 | 7,789180972 | 2,12954E-06 | 5,99561E-06 |
| SMPD4      | 0,406189466  | 6,682376357 | 2,1372E-06  | 6,01468E-06 |
| CDKN1A     | -0,741169611 | 7,782288829 | 2,15997E-06 | 6,07626E-06 |
| POLR2B     | 0,370017388  | 7,146492132 | 2,18329E-06 | 6,13932E-06 |
| MFN2       | -0,362552439 | 7,395617503 | 2,21666E-06 | 6,23058E-06 |
| IAH1       | 0,640950406  | 5,664000002 | 2,23018E-06 | 6,26602E-06 |
| MAVS       | -0,475227443 | 7,202507274 | 2,24829E-06 | 6,3143E-06  |
| USP37      | 0,376324764  | 4,91357089  | 2,2549E-06  | 6,33026E-06 |
| TGFBI      | 1,391078794  | 9,235408945 | 2,26707E-06 | 6,36179E-06 |
| CBLB       | 0,496374511  | 5,053780748 | 2,26937E-06 | 6,36561E-06 |
| ADAT1      | 0,439582515  | 4,389343279 | 2,31252E-06 | 6,48399E-06 |
| GADD45GIP1 | 0,623574151  | 5,773304987 | 2,35927E-06 | 6,61236E-06 |
| CBR1       | 1,266014185  | 7,54338657  | 2,3774E-06  | 6,66044E-06 |
| POLR3H     | -0,553904889 | 6,522979176 | 2,38694E-06 | 6,68442E-06 |
| LSG1       | 0,516264416  | 6,067139127 | 2,39044E-06 | 6,69146E-06 |
| SLU7       | -0,322589662 | 6,319691792 | 2,39789E-06 | 6,70956E-06 |
| AACS       | 0,53128569   | 5,752352648 | 2,39978E-06 | 6,71209E-06 |
| DCUN1D2    | -0,381524802 | 4,080420015 | 2,40518E-06 | 6,72444E-06 |
| ZNF395     | -0,506672466 | 6,509099382 | 2,41621E-06 | 6,75252E-06 |
| WHSC1      | 0,565505127  | 6,60741495  | 2,42425E-06 | 6,7722E-06  |
| IK         | -0,352947101 | 7,253182439 | 2,44096E-06 | 6,81609E-06 |
| GLIS2      | -0,576303634 | 5,891710815 | 2,44282E-06 | 6,8185E-06  |
| BTF3       | 0,467704268  | 9,124384635 | 2,45673E-06 | 6,85453E-06 |
| UBA6       | 0,413285161  | 6,057236611 | 2,47459E-06 | 6,90152E-06 |

|          |              |             |             |             |
|----------|--------------|-------------|-------------|-------------|
| GTF3C6   | 0,452679026  | 5,814204596 | 2,48292E-06 | 6,92193E-06 |
| KIAA0513 | -0,646943938 | 5,442199546 | 2,49418E-06 | 6,95048E-06 |
| CFLAR    | -0,540976552 | 7,215939213 | 2,4978E-06  | 6,95773E-06 |
| SNX6     | 0,527806139  | 7,296900327 | 2,54202E-06 | 7,078E-06   |
| RPL36    | 0,682947409  | 8,909804434 | 2,55656E-06 | 7,11559E-06 |
| USP16    | -0,325642724 | 5,990266816 | 2,56398E-06 | 7,13332E-06 |
| MED10    | 0,569123371  | 5,339447401 | 2,58047E-06 | 7,17629E-06 |
| IRAK1BP1 | -0,564646312 | 1,816011842 | 2,58182E-06 | 7,1771E-06  |
| PTCD2    | 0,395232968  | 3,031896502 | 2,61151E-06 | 7,25667E-06 |
| BCCIP    | 0,403044566  | 6,06704888  | 2,62907E-06 | 7,30251E-06 |
| THOC6    | 0,465226001  | 5,281822302 | 2,66442E-06 | 7,39767E-06 |
| KIAA1147 | -0,506337631 | 6,136275283 | 2,69071E-06 | 7,46762E-06 |
| PPIL3    | 0,588158899  | 4,579187032 | 2,71609E-06 | 7,53498E-06 |
| ZDBF2    | -0,659300065 | 3,767633116 | 2,72071E-06 | 7,54475E-06 |
| SRRT     | 0,352118188  | 6,696158611 | 2,72415E-06 | 7,55121E-06 |
| RAB12    | -0,403715219 | 6,13466853  | 2,73931E-06 | 7,59014E-06 |
| PLK1S1   | -0,442685722 | 3,983878055 | 2,75342E-06 | 7,62615E-06 |
| RPS10    | 0,793986585  | 10,16202687 | 2,76932E-06 | 7,66706E-06 |
| LONP2    | 0,374624778  | 6,409984318 | 2,79059E-06 | 7,72282E-06 |
| TMX3     | -0,422437748 | 6,05440426  | 2,84058E-06 | 7,85798E-06 |
| MTMR14   | -0,351712446 | 6,021511581 | 2,84744E-06 | 7,87377E-06 |
| C19orf53 | 0,587167459  | 6,748677408 | 2,85015E-06 | 7,87805E-06 |
| ATL2     | 0,563087951  | 6,81771457  | 2,8656E-06  | 7,91756E-06 |
| ARCN1    | 0,348508366  | 8,23471134  | 2,90157E-06 | 8,0137E-06  |
| ZNF511   | 0,574329084  | 5,256621449 | 2,93191E-06 | 8,09422E-06 |
| NLGN2    | 0,680842029  | 4,870037007 | 2,95171E-06 | 8,14558E-06 |
| TMEM170A | -0,314473366 | 5,388298464 | 2,9718E-06  | 8,19659E-06 |
| REXO4    | 0,386538855  | 5,12694352  | 2,9726E-06  | 8,19659E-06 |
| ARNT     | -0,379270424 | 6,663751045 | 2,97612E-06 | 8,20299E-06 |
| PSMD1    | 0,400287538  | 7,261194263 | 2,97999E-06 | 8,21033E-06 |
| SMC2     | 0,60523477   | 5,231509213 | 2,98499E-06 | 8,22079E-06 |
| RPS6KA5  | -0,632207953 | 3,420633307 | 2,98903E-06 | 8,22858E-06 |
| ZC3H13   | -0,545177933 | 6,421345954 | 3,00592E-06 | 8,27175E-06 |
| ILK      | -0,387847452 | 7,400334466 | 3,03064E-06 | 8,33639E-06 |
| TCEB2    | 0,604847906  | 7,616265355 | 3,04456E-06 | 8,3713E-06  |
| TOMM34   | 0,51743322   | 5,760803414 | 3,05332E-06 | 8,392E-06   |
| WDFY3    | -0,441340791 | 6,218620952 | 3,09329E-06 | 8,49684E-06 |
| GANAB    | 0,400549147  | 9,292889468 | 3,09395E-06 | 8,49684E-06 |
| PSME2    | 0,607845337  | 7,699905534 | 3,11587E-06 | 8,5536E-06  |
| NR1H2    | -0,349122083 | 6,981673389 | 3,16086E-06 | 8,6736E-06  |
| SFRP4    | 1,278896672  | 6,52402732  | 3,17912E-06 | 8,72019E-06 |
| CAND1    | 0,7344494    | 7,566276732 | 3,20287E-06 | 8,7818E-06  |
| SDCCAG8  | -0,36075926  | 5,510231267 | 3,21604E-06 | 8,81438E-06 |
| PPHLN1   | 0,335953292  | 6,078068906 | 3,21892E-06 | 8,81873E-06 |
| TNIK     | -0,890550414 | 4,855955386 | 3,25687E-06 | 8,91913E-06 |
| ETV6     | 0,48674974   | 6,391059539 | 3,26954E-06 | 8,95023E-06 |
| SLTM     | -0,410350796 | 6,645588694 | 3,27339E-06 | 8,95716E-06 |
| MRRF     | 0,428189352  | 4,714042689 | 3,34717E-06 | 9,15538E-06 |
| NDUFB10  | 0,504709715  | 6,428580562 | 3,37048E-06 | 9,21543E-06 |
| FAM102A  | 0,622674244  | 6,910023139 | 3,43854E-06 | 9,39775E-06 |

|            |              |             |             |             |
|------------|--------------|-------------|-------------|-------------|
| SMARCAL1   | 0,254351206  | 5,156140253 | 3,44922E-06 | 9,42318E-06 |
| HINFP      | 0,368740409  | 4,636217585 | 3,49333E-06 | 9,53985E-06 |
| FAM108A1   | -0,392020564 | 5,750861099 | 3,4992E-06  | 9,55207E-06 |
| PXK        | -0,450773829 | 3,954231725 | 3,53784E-06 | 9,65367E-06 |
| ASS1       | 0,940854529  | 7,818838853 | 3,54987E-06 | 9,68263E-06 |
| HAUS5      | 0,544258629  | 4,707283259 | 3,55563E-06 | 9,69447E-06 |
| EMP3       | -0,730595645 | 6,25272673  | 3,55781E-06 | 9,69652E-06 |
| SPRYD3     | -0,4121502   | 6,470208379 | 3,56553E-06 | 9,7106E-06  |
| VAT1       | -0,520897935 | 8,408747929 | 3,56582E-06 | 9,7106E-06  |
| ARPC5L     | 0,428831039  | 6,175627101 | 3,60209E-06 | 9,8035E-06  |
| ZC3H3      | 0,478734578  | 5,318107363 | 3,60281E-06 | 9,8035E-06  |
| SDC4       | -0,617300218 | 9,785624996 | 3,60975E-06 | 9,81848E-06 |
| NKG7       | -1,001295368 | 4,400068493 | 3,70362E-06 | 1,00698E-05 |
| CRISPLD2   | -0,769544567 | 6,557592526 | 3,7197E-06  | 1,01094E-05 |
| RSPRY1     | 0,428828689  | 4,985927663 | 3,76474E-06 | 1,02278E-05 |
| C5orf24    | -0,370984065 | 6,60050784  | 3,87092E-06 | 1,05121E-05 |
| HSPA6      | 1,400569438  | 5,088620568 | 3,9188E-06  | 1,06378E-05 |
| TRMT1      | 0,446688599  | 5,008067032 | 4,02496E-06 | 1,09217E-05 |
| ARL8B      | -0,334405285 | 7,301182037 | 4,02974E-06 | 1,09303E-05 |
| SNX8       | 0,601863661  | 5,312161742 | 4,0681E-06  | 1,103E-05   |
| PSMD13     | 0,471008143  | 7,504660849 | 4,08196E-06 | 1,10631E-05 |
| CHD2       | -0,497307502 | 7,257271602 | 4,09471E-06 | 1,10933E-05 |
| AGAP3      | -0,428441992 | 6,73708268  | 4,10619E-06 | 1,112E-05   |
| SON        | -0,392159058 | 8,354448556 | 4,14088E-06 | 1,12095E-05 |
| NPRL2      | 0,488633352  | 4,677139885 | 4,15209E-06 | 1,12353E-05 |
| MBOAT2     | 0,712438862  | 5,739075855 | 4,17898E-06 | 1,13036E-05 |
| MOV10      | 0,457767861  | 6,12102269  | 4,21285E-06 | 1,13907E-05 |
| CAPRIN2    | -0,584766664 | 4,285720326 | 4,21449E-06 | 1,13907E-05 |
| TTC21B     | -0,417631555 | 4,668879284 | 4,22776E-06 | 1,1422E-05  |
| RANBP9     | 0,387355232  | 6,471097914 | 4,26769E-06 | 1,15253E-05 |
| CMC1       | 0,591944779  | 4,411827363 | 4,27783E-06 | 1,15481E-05 |
| CNIH       | 0,653693013  | 6,947480956 | 4,28494E-06 | 1,15627E-05 |
| MSC        | 1,083982424  | 3,51514571  | 4,30481E-06 | 1,16118E-05 |
| CCDC51     | 0,469781899  | 4,202787289 | 4,33552E-06 | 1,169E-05   |
| C7orf49    | 0,419413292  | 5,55017065  | 4,40491E-06 | 1,18724E-05 |
| NOC4L      | 0,434992599  | 4,738950471 | 4,46175E-06 | 1,20208E-05 |
| KLC2       | 0,497771624  | 5,454900411 | 4,46579E-06 | 1,2027E-05  |
| PTEN       | -0,328108285 | 6,891219348 | 4,4691E-06  | 1,20311E-05 |
| CDKN2AIPNL | 0,535887995  | 5,012984851 | 4,49845E-06 | 1,21053E-05 |
| TALDO1     | 0,664887247  | 8,292687583 | 4,50477E-06 | 1,21117E-05 |
| RAD9A      | 0,462366734  | 4,310983632 | 4,505E-06   | 1,21117E-05 |
| REEP5      | -0,427169886 | 7,99188177  | 4,50615E-06 | 1,21117E-05 |
| SMC5       | -0,42540729  | 5,902100842 | 4,53164E-06 | 1,21754E-05 |
| SMC4       | 0,575896881  | 6,764236826 | 4,55582E-06 | 1,22356E-05 |
| KCMF1      | 0,33918379   | 6,550065586 | 4,57907E-06 | 1,22932E-05 |
| C14orf119  | 0,560558245  | 6,61128032  | 4,58221E-06 | 1,22968E-05 |
| FAM106A    | -0,486364868 | 1,303330219 | 4,59898E-06 | 1,23369E-05 |
| MRPL53     | 0,563704579  | 4,599164914 | 4,64685E-06 | 1,24604E-05 |
| ELP4       | -0,307667769 | 4,011984869 | 4,65618E-06 | 1,24804E-05 |
| TOLLIP     | -0,341684628 | 6,461428825 | 4,65795E-06 | 1,24804E-05 |

|           |              |             |             |             |
|-----------|--------------|-------------|-------------|-------------|
| MARK2     | 0,348401981  | 6,640794473 | 4,68268E-06 | 1,25417E-05 |
| ZNF426    | -0,437290138 | 3,15081429  | 4,71959E-06 | 1,26356E-05 |
| RFX3      | -0,733220748 | 2,395812856 | 4,73963E-06 | 1,26843E-05 |
| SLC4A7    | 0,625600148  | 4,890288807 | 4,8099E-06  | 1,28673E-05 |
| SVIL      | -0,537691819 | 7,027911621 | 4,82751E-06 | 1,29093E-05 |
| TTL4      | 0,444859409  | 5,026899986 | 4,86324E-06 | 1,29998E-05 |
| RRP1B     | 0,408648654  | 5,935383286 | 4,88663E-06 | 1,30544E-05 |
| FEZ2      | -0,348779426 | 6,049121429 | 4,88751E-06 | 1,30544E-05 |
| ZCCHC7    | 0,423305466  | 4,987218514 | 4,93294E-06 | 1,31706E-05 |
| C8orf33   | 0,468208062  | 6,405192661 | 5,00839E-06 | 1,33668E-05 |
| DYSF      | -0,702299144 | 5,932157669 | 5,07704E-06 | 1,35447E-05 |
| ADAR      | 0,47647213   | 9,200571708 | 5,10025E-06 | 1,36013E-05 |
| ERCC8     | 0,388843332  | 3,655721597 | 5,11483E-06 | 1,36349E-05 |
| ENPP4     | -0,626211806 | 6,301408442 | 5,13907E-06 | 1,36942E-05 |
| MYO5C     | -0,730668638 | 6,500699887 | 5,16603E-06 | 1,37606E-05 |
| ACTG1     | 0,428937042  | 12,20501952 | 5,18088E-06 | 1,37948E-05 |
| SSX2IP    | 0,705654879  | 4,685809377 | 5,19788E-06 | 1,38346E-05 |
| UGGT1     | 0,470890274  | 7,387251465 | 5,21436E-06 | 1,38731E-05 |
| CD320     | 0,663038269  | 5,642007657 | 5,21724E-06 | 1,38753E-05 |
| DUSP22    | -0,415520485 | 6,066991214 | 5,24669E-06 | 1,39443E-05 |
| WDR70     | 0,39585152   | 5,324756786 | 5,24727E-06 | 1,39443E-05 |
| TAF4      | 0,445445168  | 4,970004806 | 5,26671E-06 | 1,39905E-05 |
| PEX13     | 0,3425947    | 6,342527182 | 5,26999E-06 | 1,39938E-05 |
| HDAC3     | 0,358097774  | 6,218407825 | 5,27294E-06 | 1,39962E-05 |
| VPS13A    | -0,550403528 | 5,270827567 | 5,29948E-06 | 1,40611E-05 |
| MFN1      | 0,429432238  | 5,622371231 | 5,33967E-06 | 1,41623E-05 |
| TATDN1    | 0,563325599  | 4,723514299 | 5,49324E-06 | 1,45639E-05 |
| ZNF304    | -0,446189274 | 4,119339236 | 5,50556E-06 | 1,45909E-05 |
| SIAH2     | 0,433571562  | 5,418049509 | 5,57618E-06 | 1,47723E-05 |
| BRPF3     | 0,539299788  | 6,472082898 | 5,62634E-06 | 1,48994E-05 |
| ARHGEF7   | -0,395091868 | 6,116150334 | 5,64555E-06 | 1,49445E-05 |
| SH3PXD2B  | 0,704500518  | 6,360383078 | 5,72488E-06 | 1,51486E-05 |
| DOPEY2    | 0,568961614  | 5,884224458 | 5,78472E-06 | 1,5301E-05  |
| ARL4C     | 0,73043959   | 6,934042154 | 5,84833E-06 | 1,54633E-05 |
| RGS1      | 1,151089099  | 7,127338821 | 5,8568E-06  | 1,54796E-05 |
| CTTNBP2NL | -0,415663144 | 6,003164098 | 5,92715E-06 | 1,56595E-05 |
| ZNF37A    | -0,544304215 | 4,682921633 | 5,93384E-06 | 1,56711E-05 |
| HYMAI     | -0,449523995 | 0,240893302 | 5,93835E-06 | 1,5677E-05  |
| MTMR6     | -0,456706657 | 6,165273887 | 6,01192E-06 | 1,5865E-05  |
| RBMX      | 0,29137884   | 7,908699497 | 6,06568E-06 | 1,60003E-05 |
| TOMM22    | 0,503193447  | 6,827410267 | 6,06788E-06 | 1,60003E-05 |
| CPT1A     | -0,595004585 | 6,908322341 | 6,2569E-06  | 1,64924E-05 |
| COPG2     | 0,466366301  | 5,785989072 | 6,25971E-06 | 1,64934E-05 |
| NOTCH3    | 0,764391445  | 7,884650054 | 6,35069E-06 | 1,67238E-05 |
| TYW3      | -0,361047157 | 4,762135573 | 6,35206E-06 | 1,67238E-05 |
| CXXC5     | 0,542351533  | 5,125614205 | 6,37352E-06 | 1,67738E-05 |
| BRCA2     | 0,695775303  | 3,085027688 | 6,43471E-06 | 1,69284E-05 |
| HRSP12    | 0,575849846  | 4,48936722  | 6,49666E-06 | 1,70847E-05 |
| VPS37B    | -0,484862469 | 6,704895833 | 6,56181E-06 | 1,72428E-05 |
| ZW10      | 0,391716996  | 4,743329853 | 6,56183E-06 | 1,72428E-05 |

|           |              |             |             |             |
|-----------|--------------|-------------|-------------|-------------|
| TBC1D1    | -0,543382229 | 6,056516563 | 6,64577E-06 | 1,74567E-05 |
| SMO       | 0,949668784  | 4,176853367 | 6,65754E-06 | 1,74809E-05 |
| COPZ1     | 0,417791324  | 8,092160479 | 6,73158E-06 | 1,76684E-05 |
| PSMD10    | 0,441152141  | 6,25118531  | 6,88046E-06 | 1,80523E-05 |
| PQBP1     | 0,467274812  | 6,260964712 | 6,93424E-06 | 1,81864E-05 |
| LAMP1     | -0,425328238 | 9,019196079 | 7,00682E-06 | 1,83697E-05 |
| SOLH      | 0,436003068  | 5,845294737 | 7,03497E-06 | 1,84364E-05 |
| SSB       | 0,364099971  | 7,0421462   | 7,05674E-06 | 1,84863E-05 |
| TMEM39A   | 0,3884798    | 5,673380159 | 7,07092E-06 | 1,85164E-05 |
| OSMR      | 0,886069444  | 7,625141885 | 7,16641E-06 | 1,87583E-05 |
| MTA2      | 0,307996877  | 6,927795575 | 7,16882E-06 | 1,87583E-05 |
| RNF113A   | 0,423943642  | 4,423834445 | 7,18661E-06 | 1,87977E-05 |
| YTHDC1    | -0,286511833 | 6,547171875 | 7,22239E-06 | 1,8884E-05  |
| ZNF17     | -0,384845558 | 2,797385469 | 7,30845E-06 | 1,91017E-05 |
| PHPT1     | 0,654053087  | 6,597281833 | 7,32662E-06 | 1,91419E-05 |
| IGBP1     | 0,458053165  | 6,682579003 | 7,37114E-06 | 1,92508E-05 |
| DCBLD2    | 1,149819156  | 7,558693455 | 7,38894E-06 | 1,92899E-05 |
| SV2A      | 1,140820621  | 3,615690515 | 7,63272E-06 | 1,99187E-05 |
| RNF5      | 0,465835719  | 6,258507513 | 7,66157E-06 | 1,99863E-05 |
| MYCBP2    | -0,549060886 | 6,408079165 | 7,70014E-06 | 2,00793E-05 |
| DNAJC2    | 0,482287327  | 5,383252682 | 7,78177E-06 | 2,02844E-05 |
| PKN1      | -0,352652816 | 7,561034749 | 7,924E-06   | 2,06472E-05 |
| NDUFS5    | 0,544277293  | 7,208762868 | 8,0016E-06  | 2,08415E-05 |
| HTRA2     | 0,395776892  | 5,337851848 | 8,01802E-06 | 2,08762E-05 |
| DCAF5     | -0,352091672 | 6,539729621 | 8,07279E-06 | 2,10108E-05 |
| SLC25A5   | 0,594796982  | 9,048390387 | 8,09356E-06 | 2,10568E-05 |
| RPS8      | 0,685699985  | 10,67099079 | 8,18542E-06 | 2,12877E-05 |
| HACL1     | -0,438764975 | 4,47349106  | 8,28977E-06 | 2,15509E-05 |
| FAM58A    | 0,645535973  | 5,027737208 | 8,30092E-06 | 2,15716E-05 |
| AKR1A1    | 0,444524178  | 7,538738662 | 8,33839E-06 | 2,16607E-05 |
| GUF1      | 0,375544645  | 5,217342388 | 8,49645E-06 | 2,20629E-05 |
| ZNF260    | 0,448644099  | 5,280389538 | 8,52187E-06 | 2,21205E-05 |
| ATN1      | -0,471546447 | 7,907217626 | 8,62512E-06 | 2,238E-05   |
| ATF6B     | 0,374252182  | 7,274813026 | 8,86992E-06 | 2,30065E-05 |
| CMAS      | 0,59208244   | 5,669096921 | 8,90837E-06 | 2,30974E-05 |
| RPL19     | 0,476245289  | 10,54084927 | 8,92345E-06 | 2,31277E-05 |
| FBXW5     | 0,447890153  | 7,193080834 | 8,94491E-06 | 2,31745E-05 |
| DDX10     | 0,376334682  | 5,237802855 | 8,98743E-06 | 2,32758E-05 |
| RBBP8     | 0,577436257  | 6,031952908 | 8,99738E-06 | 2,32928E-05 |
| ADAM9     | 0,706024343  | 8,415889948 | 9,01842E-06 | 2,33384E-05 |
| CAPN1     | 0,391020914  | 8,539462716 | 9,08241E-06 | 2,3495E-05  |
| TAOK3     | -0,415154823 | 6,185337623 | 9,10583E-06 | 2,35467E-05 |
| PPP2R5D   | 0,314316444  | 6,236309367 | 9,18436E-06 | 2,37408E-05 |
| PDGFA     | -0,778157001 | 5,546454915 | 9,28023E-06 | 2,39795E-05 |
| RAB11B    | -0,314057726 | 7,155574662 | 9,28843E-06 | 2,39916E-05 |
| CWC25     | -0,356084081 | 4,880402787 | 9,50379E-06 | 2,45386E-05 |
| UHRF1BP1L | -0,357289298 | 4,882837078 | 9,57486E-06 | 2,47127E-05 |
| PABPC4    | 0,423550449  | 7,715160573 | 9,68728E-06 | 2,49934E-05 |
| RPL37A    | 0,541066911  | 10,00669239 | 9,79491E-06 | 2,52615E-05 |
| CISD3     | 0,462323081  | 5,71618896  | 9,80467E-06 | 2,52771E-05 |

|               |              |             |             |             |
|---------------|--------------|-------------|-------------|-------------|
| ALDOC         | 0,904746858  | 5,464951877 | 9,84071E-06 | 2,53605E-05 |
| RNF26         | 0,414824047  | 6,194724779 | 9,91612E-06 | 2,55452E-05 |
| POP4          | 0,564485012  | 5,561933321 | 9,98192E-06 | 2,57049E-05 |
| PANX1         | 0,486552325  | 5,109307814 | 1,02148E-05 | 2,62947E-05 |
| DHRS4         | -0,394042275 | 4,966069788 | 1,02404E-05 | 2,63507E-05 |
| PWP2          | 0,36509746   | 5,521475652 | 1,03058E-05 | 2,65089E-05 |
| ATP5E         | 0,495302748  | 8,30382195  | 1,03949E-05 | 2,6728E-05  |
| ANAPC7        | 0,379889876  | 5,991646801 | 1,04156E-05 | 2,67712E-05 |
| HIST2H2BE     | 0,90660894   | 5,297343004 | 1,04341E-05 | 2,68087E-05 |
| GIT2          | -0,311374673 | 6,166470909 | 1,06155E-05 | 2,72644E-05 |
| NDUFV1        | 0,357589429  | 7,147330212 | 1,06368E-05 | 2,73089E-05 |
| NAA50         | 0,419033486  | 7,448697567 | 1,07067E-05 | 2,74781E-05 |
| SNTA1         | 0,844006427  | 5,190858371 | 1,0755E-05  | 2,75915E-05 |
| SOD1          | 0,510679507  | 7,822331694 | 1,08426E-05 | 2,78058E-05 |
| ZDHHC2        | -0,635022264 | 6,052868448 | 1,0906E-05  | 2,79579E-05 |
| MGAT4B        | 0,455645149  | 7,420826451 | 1,09578E-05 | 2,80802E-05 |
| LOC650623     | -0,577634245 | 2,694714126 | 1,10404E-05 | 2,82813E-05 |
| USP28         | 0,50746363   | 5,196820058 | 1,10902E-05 | 2,83981E-05 |
| S100A13       | 0,784651809  | 7,192539404 | 1,11098E-05 | 2,84376E-05 |
| SPAG9         | -0,461173041 | 7,45393783  | 1,1493E-05  | 2,94074E-05 |
| DKFZP586I1420 | -0,522634524 | 3,917237363 | 1,15664E-05 | 2,95842E-05 |
| LACTB         | -0,439475414 | 4,975144806 | 1,17774E-05 | 3,01125E-05 |
| INO80D        | -0,393457202 | 4,881057664 | 1,18846E-05 | 3,03752E-05 |
| CRTC1         | -0,501415962 | 4,698226959 | 1,19547E-05 | 3,05428E-05 |
| TMEM33        | 0,366586604  | 7,001793514 | 1,19817E-05 | 3,06005E-05 |
| PSMB7         | 0,420267897  | 7,046698646 | 1,20942E-05 | 3,08763E-05 |
| NDUFA9        | 0,576402883  | 6,451380162 | 1,21771E-05 | 3,10761E-05 |
| TMEM185B      | 0,478209137  | 5,292499103 | 1,22224E-05 | 3,11801E-05 |
| ENTPD5        | 0,534057417  | 3,747426746 | 1,22504E-05 | 3,12398E-05 |
| TUT1          | 0,343485156  | 5,202647031 | 1,22923E-05 | 3,1335E-05  |
| SMAD1         | 0,615902116  | 5,525822336 | 1,2342E-05  | 3,1439E-05  |
| PPL           | -0,689181533 | 7,568408385 | 1,23423E-05 | 3,1439E-05  |
| HIVEP1        | -0,511641856 | 5,385054395 | 1,2419E-05  | 3,16225E-05 |
| TRIM56        | -0,598092376 | 4,856333698 | 1,24904E-05 | 3,17925E-05 |
| POLR2F        | 0,698645034  | 5,808612926 | 1,25241E-05 | 3,18662E-05 |
| GCLM          | 0,784559553  | 5,572111857 | 1,28115E-05 | 3,25854E-05 |
| NR2C2         | -0,425434835 | 5,872410004 | 1,28429E-05 | 3,26531E-05 |
| GALNT1        | 0,467026235  | 7,317211363 | 1,29893E-05 | 3,30131E-05 |
| BTN3A2        | -0,587684913 | 6,771214456 | 1,30168E-05 | 3,30705E-05 |
| WIBG          | 0,435582571  | 5,537448302 | 1,32049E-05 | 3,35361E-05 |
| ZNRF2         | 0,460242606  | 5,410828737 | 1,32517E-05 | 3,36425E-05 |
| KIAA0240      | -0,424505618 | 5,402951721 | 1,32639E-05 | 3,36608E-05 |
| SLC35D1       | 0,433685611  | 5,060801387 | 1,34343E-05 | 3,40806E-05 |
| DLAT          | 0,374850174  | 6,231458246 | 1,34631E-05 | 3,41408E-05 |
| ACLY          | 0,468493228  | 7,979532605 | 1,38633E-05 | 3,51427E-05 |
| ARMC5         | -0,415235179 | 4,376618424 | 1,40862E-05 | 3,56946E-05 |
| NFKBID        | -0,630548122 | 2,176903302 | 1,41058E-05 | 3,57309E-05 |
| BOD1          | 0,528790403  | 5,777332628 | 1,43659E-05 | 3,63762E-05 |
| ZNF680        | 0,60464321   | 4,334807228 | 1,47951E-05 | 3,74422E-05 |
| INO80B        | 0,380582364  | 5,283909516 | 1,47979E-05 | 3,74422E-05 |



|          |              |             |             |             |
|----------|--------------|-------------|-------------|-------------|
| VEZT     | 0,365904763  | 6,952654798 | 1,50221E-05 | 3,7991E-05  |
| DNAJB14  | -0,35917289  | 4,747349552 | 1,50259E-05 | 3,7991E-05  |
| THOC5    | 0,427831869  | 5,520176039 | 1,50513E-05 | 3,80409E-05 |
| ABHD12   | 0,512953847  | 6,83075937  | 1,50669E-05 | 3,80663E-05 |
| CIAPIN1  | 0,368673779  | 6,029224219 | 1,50867E-05 | 3,80994E-05 |
| HIP1R    | 0,528236284  | 6,079109326 | 1,50911E-05 | 3,80994E-05 |
| MTMR12   | -0,338795458 | 6,566564374 | 1,52291E-05 | 3,84334E-05 |
| MRPS28   | 0,594142371  | 5,02692101  | 1,52438E-05 | 3,84563E-05 |
| TIAL1    | 0,300048912  | 6,471585149 | 1,52535E-05 | 3,84666E-05 |
| DDX47    | 0,4408083    | 6,30967955  | 1,5451E-05  | 3,89502E-05 |
| TMEM167B | -0,303431699 | 6,401263534 | 1,56032E-05 | 3,93193E-05 |
| ZNF317   | -0,307525154 | 5,265882434 | 1,56233E-05 | 3,93556E-05 |
| EEF1D    | 0,457144988  | 9,166283282 | 1,56649E-05 | 3,94457E-05 |
| TRIAP1   | 0,488850634  | 5,337664254 | 1,56749E-05 | 3,94564E-05 |
| GALK1    | 0,520512398  | 5,058942291 | 1,58947E-05 | 3,99949E-05 |
| UBE2A    | 0,461744627  | 6,900782766 | 1,59355E-05 | 4,00826E-05 |
| CCDC66   | -0,439988885 | 4,151165735 | 1,59533E-05 | 4,01125E-05 |
| XRCC6    | 0,320342126  | 8,940425222 | 1,6201E-05  | 4,07205E-05 |
| TCF7L1   | -0,758408423 | 5,140118092 | 1,62395E-05 | 4,08022E-05 |
| IL4R     | -0,459849484 | 7,048094028 | 1,62589E-05 | 4,0836E-05  |
| NT5C     | 0,460486547  | 4,99464197  | 1,62959E-05 | 4,09137E-05 |
| MFSD1    | -0,391697908 | 7,022392758 | 1,64046E-05 | 4,11716E-05 |
| SMARCC1  | 0,423907913  | 7,344805873 | 1,66197E-05 | 4,1696E-05  |
| IFT122   | -0,469935568 | 5,12706352  | 1,66286E-05 | 4,17029E-05 |
| TAF9     | 0,385044395  | 6,31015748  | 1,67213E-05 | 4,192E-05   |
| CEP290   | -0,462045517 | 4,451356314 | 1,68126E-05 | 4,21335E-05 |
| RPL10A   | 0,630955267  | 9,983487593 | 1,69269E-05 | 4,24044E-05 |
| MOSPD3   | 0,432632001  | 4,744556859 | 1,69392E-05 | 4,24195E-05 |
| RNF166   | -0,373573967 | 4,600093308 | 1,70701E-05 | 4,27317E-05 |
| CGGBP1   | -0,283664542 | 6,965433027 | 1,72718E-05 | 4,32207E-05 |
| CFL1     | 0,35184012   | 10,17256471 | 1,73239E-05 | 4,33352E-05 |
| LOC90834 | -0,471616508 | 2,377673804 | 1,73774E-05 | 4,34458E-05 |
| RPL29    | 0,640002099  | 10,13626555 | 1,73809E-05 | 4,34458E-05 |
| TRIM37   | 0,439657304  | 5,441772094 | 1,74124E-05 | 4,35085E-05 |
| ERBB2    | 0,639225362  | 8,519213166 | 1,7524E-05  | 4,37714E-05 |
| LDHB     | 0,855153878  | 9,348089052 | 1,76446E-05 | 4,40567E-05 |
| BCL7C    | 0,522865914  | 5,805848989 | 1,76621E-05 | 4,40841E-05 |
| NCBP1    | 0,340344903  | 5,736771803 | 1,7778E-05  | 4,43572E-05 |
| AP2S1    | 0,432439445  | 6,609784452 | 1,781E-05   | 4,44169E-05 |
| ARMC8    | -0,268836929 | 5,513289376 | 1,78149E-05 | 4,44169E-05 |
| MAST4    | -0,666859539 | 5,364306401 | 1,79253E-05 | 4,46758E-05 |
| SPATA6   | -0,604269972 | 2,912063461 | 1,79466E-05 | 4,47124E-05 |
| YME1L1   | 0,29267585   | 7,818308963 | 1,81397E-05 | 4,51769E-05 |
| FAT1     | 0,892281864  | 7,631686437 | 1,82214E-05 | 4,53638E-05 |
| CRYZL1   | -0,343496631 | 4,735591039 | 1,83411E-05 | 4,56454E-05 |
| L2HGDH   | 0,351013856  | 4,883864665 | 1,83619E-05 | 4,56803E-05 |
| MAPKAPK5 | 0,347080668  | 5,246844224 | 1,86967E-05 | 4,64962E-05 |
| LYST     | -0,507565689 | 5,622767827 | 1,87517E-05 | 4,66161E-05 |
| FLNA     | -0,614793823 | 10,72240124 | 1,88136E-05 | 4,6753E-05  |
| SLC44A1  | 0,481359139  | 7,407823622 | 1,88275E-05 | 4,67704E-05 |

|           |              |             |             |             |
|-----------|--------------|-------------|-------------|-------------|
| GNB5      | 0,352218105  | 5,228728226 | 1,88755E-05 | 4,68725E-05 |
| SUMO1     | 0,380473822  | 7,378639894 | 1,89259E-05 | 4,69805E-05 |
| PSENNEN   | 0,721636872  | 6,76860218  | 1,91667E-05 | 4,7561E-05  |
| NUDCD2    | 0,448129968  | 5,017056556 | 1,91974E-05 | 4,76198E-05 |
| CIB1      | 0,565394503  | 7,801326523 | 1,93516E-05 | 4,79848E-05 |
| KIAA0020  | 0,439287915  | 5,206289276 | 1,93731E-05 | 4,80208E-05 |
| SPCS1     | 0,3895949    | 7,045385643 | 1,94345E-05 | 4,81554E-05 |
| DSTN      | -0,468300293 | 9,465720889 | 1,96183E-05 | 4,85933E-05 |
| GNPAT     | 0,344186634  | 6,436475897 | 1,97277E-05 | 4,88466E-05 |
| SMG7      | 0,369936511  | 7,091091596 | 1,97768E-05 | 4,89502E-05 |
| RER1      | 0,397289574  | 7,598336191 | 1,98651E-05 | 4,91509E-05 |
| PCOLCE    | 0,875997623  | 6,787472395 | 1,98912E-05 | 4,91977E-05 |
| HACE1     | -0,404414692 | 3,991745632 | 2,00104E-05 | 4,94746E-05 |
| FAM50A    | 0,428993906  | 6,744844975 | 2,00844E-05 | 4,96396E-05 |
| TUBA1A    | -0,499153196 | 8,901198414 | 2,03937E-05 | 5,03858E-05 |
| AASDHPPT  | 0,31276174   | 5,856242999 | 2,09711E-05 | 5,17934E-05 |
| GDI2      | 0,398828241  | 8,66765395  | 2,10976E-05 | 5,20872E-05 |
| ZNF800    | -0,318311521 | 4,916160061 | 2,12854E-05 | 5,25317E-05 |
| FKBP14    | 0,411939242  | 4,201376026 | 2,1402E-05  | 5,28004E-05 |
| ERCC3     | 0,267246689  | 6,145050149 | 2,14728E-05 | 5,29558E-05 |
| ZNF706    | 0,428196441  | 6,55136543  | 2,15018E-05 | 5,30082E-05 |
| TPST2     | -0,416601443 | 5,640681874 | 2,16795E-05 | 5,34255E-05 |
| ZFP36L2   | -0,486876811 | 8,076840943 | 2,16867E-05 | 5,34255E-05 |
| PDPK1     | -0,414976426 | 6,450304443 | 2,18641E-05 | 5,38429E-05 |
| BUD31     | 0,574486977  | 6,574469859 | 2,19182E-05 | 5,39566E-05 |
| SRPK2     | 0,355532395  | 5,928308953 | 2,21323E-05 | 5,4464E-05  |
| TCP1      | 0,393683646  | 7,676307916 | 2,21642E-05 | 5,45231E-05 |
| HIP1      | -0,648281658 | 6,808804043 | 2,22713E-05 | 5,47666E-05 |
| MED6      | 0,353704316  | 4,957827094 | 2,23245E-05 | 5,48778E-05 |
| MLLT6     | -0,460957759 | 7,868176852 | 2,23524E-05 | 5,49266E-05 |
| NANP      | 0,458100789  | 3,896042599 | 2,26612E-05 | 5,56652E-05 |
| SLK       | -0,44591988  | 6,967191484 | 2,27096E-05 | 5,57642E-05 |
| CHSY1     | -0,516245461 | 6,213404774 | 2,28063E-05 | 5,59665E-05 |
| SH2D2A    | 0,816065656  | 3,249961309 | 2,28085E-05 | 5,59665E-05 |
| ANKRD13A  | -0,377792631 | 6,80793538  | 2,31105E-05 | 5,66871E-05 |
| RPL18A    | 0,661115927  | 10,24304775 | 2,31274E-05 | 5,67083E-05 |
| PHB2      | 0,567207347  | 8,022765914 | 2,32403E-05 | 5,69648E-05 |
| C5orf51   | 0,394948082  | 5,933564156 | 2,34273E-05 | 5,73833E-05 |
| ATP5C1    | 0,4930546    | 7,655517109 | 2,34279E-05 | 5,73833E-05 |
| ADAM19    | 0,84678115   | 5,307504071 | 2,34665E-05 | 5,74571E-05 |
| MPHOSPH10 | 0,285927751  | 5,71423151  | 2,36843E-05 | 5,79696E-05 |
| RFT1      | 0,300858533  | 5,321843433 | 2,37644E-05 | 5,81448E-05 |
| NUTF2     | 0,456298999  | 6,990045432 | 2,38371E-05 | 5,83018E-05 |
| SUZ12     | 0,417586005  | 6,119947889 | 2,40256E-05 | 5,87417E-05 |
| GOSR2     | 0,363498511  | 6,349670375 | 2,40579E-05 | 5,87995E-05 |
| EHD4      | -0,382582248 | 6,738650283 | 2,4309E-05  | 5,93919E-05 |
| SPEN      | -0,499402144 | 6,750835283 | 2,45998E-05 | 6,0081E-05  |
| DSC2      | 0,757239235  | 6,09171105  | 2,466E-05   | 6,02065E-05 |
| SPIN1     | -0,262047461 | 6,886681847 | 2,47642E-05 | 6,04391E-05 |
| DCAF11    | -0,293120782 | 6,926893863 | 2,50684E-05 | 6,11409E-05 |

|          |              |             |             |             |
|----------|--------------|-------------|-------------|-------------|
| LYSMD3   | -0,375917179 | 5,647635155 | 2,50697E-05 | 6,11409E-05 |
| MRPL49   | 0,512868782  | 6,935545664 | 2,5231E-05  | 6,15124E-05 |
| AP3S1    | 0,371645707  | 6,178063756 | 2,52635E-05 | 6,15586E-05 |
| KTN1     | -0,410045919 | 8,151772544 | 2,5268E-05  | 6,15586E-05 |
| TCF7L2   | -0,428424645 | 5,645219799 | 2,54538E-05 | 6,1989E-05  |
| DDHD1    | -0,469686395 | 4,956038172 | 2,55756E-05 | 6,22636E-05 |
| RNF6     | -0,332658141 | 5,72467796  | 2,61147E-05 | 6,35323E-05 |
| TOMM20   | 0,418928253  | 8,542334708 | 2,61154E-05 | 6,35323E-05 |
| ACTR1A   | -0,263496578 | 7,515255901 | 2,62776E-05 | 6,3904E-05  |
| CASK     | 0,474966441  | 6,362151768 | 2,63363E-05 | 6,40114E-05 |
| TSPYL4   | -0,454117476 | 5,095256662 | 2,63405E-05 | 6,40114E-05 |
| SMCR8    | -0,42806746  | 5,849079675 | 2,67742E-05 | 6,5042E-05  |
| PTK7     | 0,594135344  | 7,928296861 | 2,68002E-05 | 6,50821E-05 |
| RGL1     | -0,612493229 | 6,249146794 | 2,69259E-05 | 6,53641E-05 |
| ARF5     | 0,478525507  | 7,542758869 | 2,69657E-05 | 6,54373E-05 |
| ANAPC5   | 0,372873912  | 7,248270602 | 2,71011E-05 | 6,57426E-05 |
| OXSM     | 0,471181737  | 3,554169292 | 2,72844E-05 | 6,61575E-05 |
| FAM82B   | -0,307773734 | 5,623826225 | 2,72915E-05 | 6,61575E-05 |
| MBOAT1   | 0,50897672   | 5,530657754 | 2,74604E-05 | 6,65431E-05 |
| PSIP1    | -0,501745017 | 6,35432856  | 2,75376E-05 | 6,67065E-05 |
| TTYH2    | -0,615071769 | 3,723705587 | 2,75556E-05 | 6,67263E-05 |
| RPA2     | 0,40238882   | 6,190658178 | 2,76804E-05 | 6,69967E-05 |
| PDSS1    | 0,506482364  | 2,822121983 | 2,76869E-05 | 6,69967E-05 |
| TRAF3IP1 | -0,41022814  | 5,255735753 | 2,76985E-05 | 6,7001E-05  |
| RHOT2    | 0,349380245  | 6,253048261 | 2,77104E-05 | 6,70061E-05 |
| CDK2AP2  | 0,589918573  | 7,052775537 | 2,8161E-05  | 6,80716E-05 |
| UFC1     | 0,440968314  | 7,487154914 | 2,81808E-05 | 6,80952E-05 |
| PSME4    | 0,397657177  | 6,86955955  | 2,84583E-05 | 6,87373E-05 |
| CINP     | 0,404525479  | 4,977335629 | 2,84666E-05 | 6,87373E-05 |
| ERCC5    | -0,397314718 | 6,13197701  | 2,84893E-05 | 6,87677E-05 |
| USP30    | -0,311929205 | 4,501752436 | 2,8642E-05  | 6,91119E-05 |
| NT5C3    | 0,421970565  | 5,373356001 | 2,87096E-05 | 6,92504E-05 |
| ARFGAP2  | -0,251940508 | 6,978197132 | 2,93374E-05 | 7,07397E-05 |
| CPNE1    | 0,51546716   | 7,324719979 | 2,94723E-05 | 7,10397E-05 |
| SLC10A3  | 0,393737944  | 5,898898255 | 2,97969E-05 | 7,17968E-05 |
| RBM45    | 0,209014792  | 3,599907164 | 2,9922E-05  | 7,20728E-05 |
| TOR1AIP1 | -0,315098567 | 6,994503792 | 2,99982E-05 | 7,22308E-05 |
| PYGB     | 0,66748052   | 8,424161396 | 3,02333E-05 | 7,27712E-05 |
| DSTYK    | -0,411282757 | 5,534483855 | 3,05273E-05 | 7,3453E-05  |
| LMNA     | -0,538425073 | 9,35213178  | 3,05861E-05 | 7,35684E-05 |
| RCN2     | 0,501420407  | 6,666775555 | 3,09002E-05 | 7,42979E-05 |
| PSMC3    | 0,304957045  | 7,302898389 | 3,09382E-05 | 7,4363E-05  |
| PAN3     | -0,382428156 | 5,602608358 | 3,09769E-05 | 7,44298E-05 |
| IQGAP1   | -0,367774215 | 9,155161728 | 3,10178E-05 | 7,45018E-05 |
| NCOR1    | -0,45463045  | 6,983856791 | 3,12566E-05 | 7,50489E-05 |
| PHC3     | -0,337112095 | 6,460748121 | 3,1319E-05  | 7,51612E-05 |
| EPC1     | -0,358547696 | 4,837124061 | 3,13255E-05 | 7,51612E-05 |
| ZNF117   | 0,870153239  | 6,622032386 | 3,14565E-05 | 7,54492E-05 |
| NINJ2    | -0,753325447 | 4,927138045 | 3,15267E-05 | 7,55908E-05 |
| MYO9B    | -0,43290751  | 7,020576835 | 3,18219E-05 | 7,6272E-05  |

|          |              |             |             |             |
|----------|--------------|-------------|-------------|-------------|
| ROCK2    | -0,511290832 | 6,051378774 | 3,19077E-05 | 7,64506E-05 |
| SNRNP200 | 0,417655648  | 8,557288811 | 3,19476E-05 | 7,65194E-05 |
| STAT6    | -0,359844404 | 8,210395989 | 3,22E-05    | 7,70969E-05 |
| PHF21A   | -0,355390165 | 5,641827036 | 3,24504E-05 | 7,76691E-05 |
| PGP      | 0,463016834  | 4,816830044 | 3,25579E-05 | 7,7899E-05  |
| UBE2D1   | 0,376735002  | 5,429575063 | 3,25838E-05 | 7,79338E-05 |
| MMADHC   | 0,373410739  | 6,894824959 | 3,29766E-05 | 7,88456E-05 |
| HDLBP    | 0,381124462  | 9,76425183  | 3,32416E-05 | 7,94332E-05 |
| BIVM     | -0,457654872 | 4,46814428  | 3,32457E-05 | 7,94332E-05 |
| KRAS     | 0,534445623  | 6,717360858 | 3,33545E-05 | 7,96653E-05 |
| MET      | 1,146635536  | 8,554128281 | 3,34617E-05 | 7,98933E-05 |
| SUGT1    | 0,381018659  | 5,432652534 | 3,37619E-05 | 8,05818E-05 |
| ATP1B3   | -0,460102291 | 7,164623255 | 3,38584E-05 | 8,07838E-05 |
| NOD1     | -0,610776876 | 5,492738945 | 3,45586E-05 | 8,24257E-05 |
| CHIC1    | -0,449928129 | 4,001503952 | 3,46754E-05 | 8,26662E-05 |
| RALY     | 0,327858634  | 8,076961825 | 3,46837E-05 | 8,26662E-05 |
| PI4KA    | -0,409120778 | 6,737310645 | 3,47532E-05 | 8,28029E-05 |
| TBC1D10B | 0,312779884  | 6,460492409 | 3,48237E-05 | 8,29419E-05 |
| CNN3     | -0,516376331 | 8,194407422 | 3,52865E-05 | 8,40148E-05 |
| ISCU     | -0,347977472 | 6,823001082 | 3,54568E-05 | 8,4391E-05  |
| RNF4     | 0,249278335  | 6,545456128 | 3,55918E-05 | 8,46825E-05 |
| EIF4E    | 0,370245439  | 6,720321532 | 3,58831E-05 | 8,53459E-05 |
| OPA1     | 0,426766318  | 6,500799314 | 3,60373E-05 | 8,56827E-05 |
| CCNG2    | 0,536809675  | 6,417087043 | 3,6074E-05  | 8,57403E-05 |
| ETFA     | 0,452353086  | 6,732920039 | 3,6243E-05  | 8,61117E-05 |
| NAA20    | 0,482353878  | 6,444654349 | 3,62752E-05 | 8,61584E-05 |
| PMPCA    | 0,318113057  | 6,114247786 | 3,62901E-05 | 8,61638E-05 |
| USP13    | -0,52374218  | 5,591863373 | 3,6305E-05  | 8,6169E-05  |
| TAP1     | 0,736120384  | 8,247961122 | 3,63252E-05 | 8,6187E-05  |
| MEGF9    | -0,616384481 | 7,03940187  | 3,63512E-05 | 8,62188E-05 |
| CYP7B1   | 0,701809935  | 3,147480409 | 3,65721E-05 | 8,67125E-05 |
| AMPD3    | 0,537497509  | 4,791768078 | 3,67452E-05 | 8,70926E-05 |
| GABPA    | -0,329723638 | 5,824591658 | 3,67927E-05 | 8,7175E-05  |
| ACBD3    | 0,349364361  | 7,078757677 | 3,69932E-05 | 8,76196E-05 |
| CCDC88B  | -0,490015969 | 4,950959814 | 3,73511E-05 | 8,84365E-05 |
| BCL2L11  | 0,408521914  | 5,692354389 | 3,77009E-05 | 8,92336E-05 |
| DAXX     | 0,253063057  | 6,4152089   | 3,77374E-05 | 8,92892E-05 |
| BRD9     | 0,426866071  | 5,945830552 | 3,83163E-05 | 9,06275E-05 |
| SLC35C1  | 0,579938083  | 6,23170732  | 3,89528E-05 | 9,21011E-05 |
| MUS81    | 0,313969728  | 5,330309679 | 3,90637E-05 | 9,2331E-05  |
| GPR125   | 0,518059485  | 5,40583882  | 3,90978E-05 | 9,23798E-05 |
| EI24     | 0,344424066  | 7,452547158 | 3,92068E-05 | 9,26051E-05 |
| ARHGEF1  | -0,400872861 | 7,175663219 | 3,92356E-05 | 9,2641E-05  |
| GMPR     | -0,627310787 | 3,928691382 | 3,97037E-05 | 9,37138E-05 |
| RBM33    | -0,358952376 | 6,003561109 | 4,019E-05   | 9,4829E-05  |
| B2M      | -0,579358659 | 12,53465032 | 4,03088E-05 | 9,50764E-05 |
| CANX     | 0,374091467  | 10,24013978 | 4,03373E-05 | 9,51107E-05 |
| SRPR     | 0,323221306  | 8,17581749  | 4,0732E-05  | 9,60066E-05 |
| RHOB     | -0,637297916 | 9,019754786 | 4,07454E-05 | 9,60066E-05 |
| CREB3L2  | 0,487961635  | 7,57595129  | 4,07868E-05 | 9,60709E-05 |

|          |              |             |             |             |
|----------|--------------|-------------|-------------|-------------|
| RPL35    | 0,709440111  | 9,547917659 | 4,09507E-05 | 9,64236E-05 |
| DDX18    | 0,358804814  | 7,106196313 | 4,10555E-05 | 9,6637E-05  |
| RLTPR    | 0,956225167  | 2,734879024 | 4,1166E-05  | 9,68383E-05 |
| HOMER1   | -0,596826166 | 4,168951715 | 4,11694E-05 | 9,68383E-05 |
| LSM14B   | 0,423728539  | 6,088294595 | 4,14939E-05 | 9,75679E-05 |
| TMEM70   | 0,551394301  | 5,577357783 | 4,16017E-05 | 9,77875E-05 |
| OBFC1    | -0,472018462 | 5,975952283 | 4,20538E-05 | 9,88162E-05 |
| FOXK2    | 0,366287435  | 6,665655948 | 4,21789E-05 | 9,90762E-05 |
| FCGRT    | -0,513972112 | 8,199822794 | 4,26921E-05 | 0,000100247 |
| PDLIM7   | 0,612003879  | 6,149067272 | 4,2775E-05  | 0,000100397 |
| RPIA     | 0,384602259  | 5,185918872 | 4,27855E-05 | 0,000100397 |
| CLEC16A  | -0,39463414  | 5,853016647 | 4,28445E-05 | 0,000100501 |
| DHX32    | 0,471108503  | 6,042003904 | 4,31947E-05 | 0,000101288 |
| MRPL1    | 0,475618089  | 4,808665638 | 4,32839E-05 | 0,000101462 |
| PAPOLG   | 0,319697099  | 4,662360764 | 4,3508E-05  | 0,000101952 |
| MCAM     | -0,628911499 | 7,225523885 | 4,35674E-05 | 0,000102056 |
| ZFYVE16  | -0,298767911 | 6,06014339  | 4,35893E-05 | 0,000102073 |
| MRPL32   | 0,517249098  | 5,818961699 | 4,37398E-05 | 0,00010239  |
| DAD1     | 0,447544245  | 7,639239775 | 4,39812E-05 | 0,00010292  |
| USP5     | 0,387673766  | 6,969217413 | 4,41179E-05 | 0,000103204 |
| UBE2E3   | 0,400631762  | 6,26785424  | 4,44586E-05 | 0,000103965 |
| ZCCHC17  | 0,418723904  | 5,760952299 | 4,45821E-05 | 0,000104219 |
| GSK3B    | -0,378550674 | 6,422551094 | 4,46196E-05 | 0,00010427  |
| CIAO1    | 0,276275887  | 7,064997205 | 4,46461E-05 | 0,000104297 |
| NEK11    | -0,656909789 | 3,985455591 | 4,47325E-05 | 0,000104463 |
| SFN      | 0,893245113  | 7,534815563 | 4,50039E-05 | 0,00010506  |
| PCCB     | 0,385634052  | 6,283305639 | 4,50621E-05 | 0,00010516  |
| PTPN11   | -0,379450029 | 7,454914724 | 4,50914E-05 | 0,000105193 |
| NR2F2    | -0,520974398 | 6,228469985 | 4,53249E-05 | 0,000105701 |
| RECQL5   | 0,439669474  | 5,110915807 | 4,53789E-05 | 0,000105791 |
| RPL28    | 0,582699829  | 9,91786075  | 4,57225E-05 | 0,000106552 |
| MRC2     | -0,608831059 | 7,678177246 | 4,57364E-05 | 0,000106552 |
| ECD      | 0,25138686   | 5,280237846 | 4,65641E-05 | 0,000108443 |
| SUPT4H1  | 0,411339963  | 6,747790137 | 4,66706E-05 | 0,000108654 |
| PDCD11   | 0,46761317   | 6,070574602 | 4,69056E-05 | 0,000109164 |
| APBA3    | 0,325332339  | 4,083847786 | 4,7003E-05  | 0,000109353 |
| VPS53    | -0,367724952 | 6,236535832 | 4,71764E-05 | 0,000109719 |
| HLA-DPB1 | -0,730685989 | 9,604589244 | 4,74422E-05 | 0,000110299 |
| CHD3     | -0,531484371 | 7,630329497 | 4,74847E-05 | 0,000110361 |
| UTP14C   | -0,354889121 | 6,048483208 | 4,75607E-05 | 0,0001105   |
| C1orf174 | 0,391611996  | 5,144008828 | 4,77529E-05 | 0,000110908 |
| RPS3     | 0,68716711   | 11,03603744 | 4,77776E-05 | 0,000110928 |
| AXIN1    | 0,326059677  | 5,786477552 | 4,79859E-05 | 0,000111374 |
| STK16    | 0,448344846  | 5,666124422 | 4,84585E-05 | 0,000112432 |
| DRG1     | 0,436882826  | 6,171350999 | 4,84907E-05 | 0,000112469 |
| ATHL1    | 1,293577335  | 6,856123876 | 4,8747E-05  | 0,000113025 |
| KIAA1671 | -0,571912963 | 6,607458643 | 4,89036E-05 | 0,000113349 |
| NIPA2    | 0,299558631  | 6,36292965  | 4,91727E-05 | 0,000113934 |
| MRPS18B  | 0,416147964  | 6,736962578 | 4,96713E-05 | 0,000115051 |
| TMEM209  | 0,323386721  | 5,598682281 | 4,99483E-05 | 0,000115653 |

|           |              |             |             |             |
|-----------|--------------|-------------|-------------|-------------|
| POLD1     | 0,407315213  | 5,310108135 | 5,01507E-05 | 0,000116082 |
| UQCRC1    | 0,371601057  | 7,578506499 | 5,01849E-05 | 0,000116101 |
| VDAC2     | 0,413746075  | 7,73560216  | 5,01928E-05 | 0,000116101 |
| RNF130    | -0,385664311 | 7,171198726 | 5,03543E-05 | 0,000116435 |
| SRC       | 0,482471153  | 6,829537432 | 5,03993E-05 | 0,000116499 |
| STAM      | -0,311797911 | 5,479042172 | 5,09927E-05 | 0,000117831 |
| SLC2A4RG  | 0,511473395  | 6,45519332  | 5,16866E-05 | 0,000119394 |
| SOX9      | 1,270607542  | 5,547385975 | 5,17403E-05 | 0,000119478 |
| ZDHHC17   | -0,32449204  | 5,16269008  | 5,20148E-05 | 0,000120071 |
| ATP5B     | 0,459407162  | 9,523434467 | 5,233E-05   | 0,000120757 |
| RCL1      | -0,350405275 | 4,663072898 | 5,27946E-05 | 0,000121788 |
| LTBR      | 0,561879312  | 7,540758667 | 5,42907E-05 | 0,000125197 |
| UCKL1     | 0,431748408  | 5,388265464 | 5,49968E-05 | 0,000126783 |
| ZNHIT1    | 0,600909123  | 6,865375392 | 5,52052E-05 | 0,00012722  |
| STARD10   | 0,765440095  | 7,35270748  | 5,53973E-05 | 0,00012762  |
| SIRT6     | 0,346338526  | 4,380799074 | 5,55044E-05 | 0,000127823 |
| RAB11FIP3 | -0,478685902 | 5,798787211 | 5,61354E-05 | 0,000129233 |
| CXCL9     | 1,365357656  | 7,088210335 | 5,61614E-05 | 0,000129249 |
| TGM2      | -0,647779625 | 9,641862808 | 5,62926E-05 | 0,000129507 |
| FTSJ3     | 0,354092912  | 6,322510443 | 5,63201E-05 | 0,000129527 |
| LATS1     | -0,444395207 | 4,462881517 | 5,63628E-05 | 0,000129581 |
| MAP3K6    | -0,546448507 | 5,990886986 | 5,68023E-05 | 0,000130548 |
| DNM2      | -0,337809339 | 7,915619497 | 5,71852E-05 | 0,000131383 |
| ALKBH4    | 0,351733148  | 4,094255344 | 5,88335E-05 | 0,000135125 |
| RPL27     | 0,667067274  | 10,07671371 | 5,89905E-05 | 0,00013544  |
| DYRK3     | -0,589232423 | 3,852996735 | 5,94862E-05 | 0,000136532 |
| SNAP23    | -0,323291925 | 6,822057978 | 5,97951E-05 | 0,000137195 |
| CUTA      | 0,39714935   | 7,115787825 | 5,99832E-05 | 0,00013758  |
| FAM109B   | 0,440434983  | 4,955631075 | 6,00517E-05 | 0,000137691 |
| INTS4     | 0,329287489  | 5,148478146 | 6,01247E-05 | 0,000137812 |
| TECPR2    | -0,399071147 | 5,200486679 | 6,03224E-05 | 0,000138218 |
| ARID5B    | -0,469855406 | 6,511252964 | 6,10138E-05 | 0,000139756 |
| ITGB3     | 1,166939788  | 4,572809722 | 6,13149E-05 | 0,000140398 |
| TSEN15    | 0,442306378  | 5,809217115 | 6,14339E-05 | 0,000140624 |
| FAM43A    | -0,829924265 | 4,233016982 | 6,17164E-05 | 0,000141223 |
| SURF2     | 0,462882301  | 4,166207201 | 6,23392E-05 | 0,0001426   |
| MGC57346  | 0,505201719  | 3,743856387 | 6,31038E-05 | 0,000144301 |
| RPL10     | 0,54582999   | 11,41847771 | 6,33722E-05 | 0,000144866 |
| ZNF16     | 0,337767797  | 3,7626975   | 6,38029E-05 | 0,000145802 |
| WRNIP1    | 0,33633539   | 6,265447383 | 6,48787E-05 | 0,00014821  |
| LLPH      | 0,440259254  | 5,877302265 | 6,58648E-05 | 0,000150413 |
| RIT1      | 0,518021488  | 6,302365115 | 6,62315E-05 | 0,000151199 |
| CALD1     | -0,526447716 | 8,163137824 | 6,63651E-05 | 0,000151454 |
| CCDC25    | -0,31971569  | 5,555664427 | 6,64012E-05 | 0,000151485 |
| C6orf106  | -0,345879749 | 7,881743074 | 6,74309E-05 | 0,000153783 |
| COMMD2    | -0,371357694 | 5,934695286 | 6,81819E-05 | 0,000155444 |
| TRPM7     | -0,351780447 | 5,734320187 | 6,93902E-05 | 0,000158146 |
| MAPK3     | -0,346965305 | 6,754702315 | 6,94937E-05 | 0,000158329 |
| TMEM9B    | -0,388514366 | 6,793612058 | 6,97551E-05 | 0,000158871 |
| TIMP2     | -0,544121832 | 9,10438015  | 7,04401E-05 | 0,000160378 |

|           |              |             |             |             |
|-----------|--------------|-------------|-------------|-------------|
| OVCA2     | 0,403714885  | 3,106174117 | 7,08999E-05 | 0,000161371 |
| ACOT2     | -0,419375848 | 5,255592148 | 7,11195E-05 | 0,000161817 |
| ICMT      | 0,334520819  | 7,355223561 | 7,17982E-05 | 0,000163306 |
| NFIC      | -0,546274524 | 5,867160223 | 7,20821E-05 | 0,000163897 |
| RHOC      | 0,581318437  | 8,436199963 | 7,2189E-05  | 0,000164086 |
| NENF      | 0,532466382  | 6,524140712 | 7,22144E-05 | 0,000164089 |
| ZBTB38    | -0,378279922 | 7,072479428 | 7,22517E-05 | 0,000164119 |
| ARPC3     | 0,458152871  | 8,64952362  | 7,24007E-05 | 0,000164402 |
| GFM2      | 0,368419718  | 5,328593926 | 7,28956E-05 | 0,000165471 |
| C14orf169 | 0,38930932   | 4,391006182 | 7,29447E-05 | 0,000165524 |
| ZNF3      | 0,330867775  | 5,50460822  | 7,29674E-05 | 0,000165524 |
| PLXNA3    | 0,581824564  | 6,048328676 | 7,36323E-05 | 0,000166977 |
| TMEM65    | 0,539831733  | 5,216187146 | 7,41842E-05 | 0,000168172 |
| TBC1D14   | -0,330334791 | 6,691051576 | 7,4228E-05  | 0,000168216 |
| MESDC2    | 0,285762472  | 6,615940114 | 7,4678E-05  | 0,000169179 |
| SNRPB2    | 0,374148307  | 6,213844629 | 7,58005E-05 | 0,000171609 |
| INPP1     | -0,501833093 | 4,857103665 | 7,5801E-05  | 0,000171609 |
| PFAS      | 0,435850619  | 4,882927506 | 7,59669E-05 | 0,000171928 |
| HCST      | -0,682960725 | 4,430473601 | 7,60959E-05 | 0,000172163 |
| YIPF5     | 0,32684914   | 6,623547059 | 7,62335E-05 | 0,000172417 |
| WIPI2     | 0,286198384  | 6,878480541 | 7,65755E-05 | 0,000173133 |
| OTUB1     | 0,304715933  | 7,027120276 | 7,66021E-05 | 0,000173135 |
| PPID      | 0,308531832  | 5,36988106  | 7,76543E-05 | 0,000175455 |
| LMBR1L    | 0,368265548  | 5,076892815 | 7,79703E-05 | 0,000176111 |
| C12orf44  | 0,42469157   | 6,142361527 | 7,87121E-05 | 0,000177728 |
| CRAMP1L   | -0,38983056  | 5,451202146 | 7,96008E-05 | 0,000179675 |
| MAGOH     | 0,382040529  | 5,279834444 | 8,07777E-05 | 0,000182271 |
| OXR1      | -0,292245105 | 6,15987381  | 8,10142E-05 | 0,000182744 |
| USP10     | 0,321365196  | 6,599948846 | 8,11037E-05 | 0,000182829 |
| EIF5      | -0,290626503 | 8,151805246 | 8,11053E-05 | 0,000182829 |
| RARRES2   | -0,719809474 | 7,097006979 | 8,13587E-05 | 0,000183339 |
| IMMT      | 0,276004661  | 6,817013701 | 8,17158E-05 | 0,000184083 |
| MT1F      | 0,857477258  | 3,715862722 | 8,23096E-05 | 0,00018536  |
| NDUFA8    | 0,414064831  | 5,760305239 | 8,23857E-05 | 0,00018547  |
| RPL27A    | 0,612339309  | 10,68295846 | 8,25952E-05 | 0,00018588  |
| KHDRBS1   | 0,253629343  | 7,850904364 | 8,31893E-05 | 0,000187155 |
| LSM10     | 0,466896309  | 5,229768162 | 8,52246E-05 | 0,000191671 |
| GXYLT2    | 0,766549637  | 2,7232755   | 8,63389E-05 | 0,000194113 |
| CNPY3     | 0,350352354  | 6,854146708 | 8,64735E-05 | 0,000194352 |
| BDP1      | -0,402361392 | 5,563509428 | 8,65277E-05 | 0,000194364 |
| SCO1      | 0,299284017  | 4,702160434 | 8,65361E-05 | 0,000194364 |
| SEC31A    | 0,285778589  | 8,243853083 | 8,69845E-05 | 0,000195307 |
| KDEL1C    | 0,729057172  | 3,120967702 | 8,76699E-05 | 0,000196781 |
| NUFIP1    | 0,333929013  | 3,778545505 | 8,91489E-05 | 0,000200035 |
| RPS6KB1   | 0,345193525  | 5,835196336 | 8,93167E-05 | 0,000200346 |
| CCDC115   | -0,301805129 | 6,052465075 | 8,97548E-05 | 0,000201262 |
| MAP2K7    | -0,275238599 | 5,547665395 | 9,00873E-05 | 0,000201941 |
| CDK12     | 0,399106621  | 6,428317503 | 9,0487E-05  | 0,000202771 |
| ZNF280C   | 0,409384953  | 3,372115769 | 9,06045E-05 | 0,000202967 |
| MRPL18    | 0,418392295  | 5,942097298 | 9,09591E-05 | 0,000203695 |

|           |              |             |             |             |
|-----------|--------------|-------------|-------------|-------------|
| ITGB5     | 0,490079794  | 7,746533135 | 9,09996E-05 | 0,000203719 |
| MPEG1     | -0,691558944 | 6,478443791 | 9,12161E-05 | 0,000204136 |
| DUSP11    | 0,3851952    | 5,284137108 | 9,12649E-05 | 0,000204178 |
| SLC30A5   | 0,295609937  | 6,439770139 | 9,13965E-05 | 0,000204406 |
| GRPEL1    | 0,352910121  | 5,557227617 | 9,15959E-05 | 0,000204784 |
| FNIP2     | -0,668535005 | 6,357416454 | 9,18513E-05 | 0,000205288 |
| NDUFA13   | 0,547611447  | 7,623646208 | 9,20505E-05 | 0,000205666 |
| CS        | 0,360930958  | 8,014852819 | 9,29758E-05 | 0,000207665 |
| TMEM41A   | 0,411693812  | 6,069269241 | 9,31685E-05 | 0,000208027 |
| TP53      | 0,529440475  | 6,42079009  | 9,4016E-05  | 0,000209851 |
| CENPQ     | 0,519512878  | 3,424337939 | 9,45628E-05 | 0,000211003 |
| RIPK1     | -0,266486099 | 6,087507071 | 9,46106E-05 | 0,00021104  |
| NBPF14    | -0,480640523 | 5,072484195 | 9,49185E-05 | 0,000211658 |
| RPLP1     | 0,648323145  | 10,90512245 | 9,50162E-05 | 0,000211806 |
| ZFAND2A   | 0,674292847  | 4,650362118 | 9,50734E-05 | 0,000211865 |
| MAPK1IP1L | -0,30677543  | 7,197824133 | 9,52315E-05 | 0,000212148 |
| TRNAU1AP  | 0,581595102  | 5,151331121 | 9,56458E-05 | 0,000213001 |
| TBC1D13   | -0,355831354 | 5,597697627 | 9,67213E-05 | 0,000215261 |
| RBL1      | 0,436249031  | 3,772839639 | 9,6724E-05  | 0,000215261 |
| C11orf75  | 0,464641127  | 5,273347215 | 9,78866E-05 | 0,000217778 |
| SIL1      | 0,450231219  | 6,632592112 | 9,79252E-05 | 0,000217793 |
| STYX      | 0,335669028  | 5,488702931 | 9,80898E-05 | 0,000218087 |
| CRAT      | 0,419101155  | 5,745650722 | 9,82325E-05 | 0,000218334 |
| SERINC3   | -0,309824991 | 7,409001623 | 9,86342E-05 | 0,000219155 |
| TMEM138   | 0,315552659  | 5,215004575 | 9,87012E-05 | 0,000219232 |
| PHF14     | 0,358070615  | 5,817791391 | 9,88968E-05 | 0,000219556 |
| UBIAD1    | 0,248435426  | 5,127861858 | 9,89111E-05 | 0,000219556 |
| ZNF267    | 0,410511418  | 4,809488239 | 9,92782E-05 | 0,000220299 |
| NFKBIL1   | 0,377379029  | 4,737499247 | 9,93593E-05 | 0,000220407 |
| MYO5A     | -0,454122612 | 5,766283122 | 9,98941E-05 | 0,000221521 |
| CUL2      | 0,312995077  | 5,718829159 | 0,000100268 | 0,000222278 |
| FOSL2     | -0,583827422 | 7,188614903 | 0,000100706 | 0,000223176 |
| TTC19     | -0,370909296 | 6,076442868 | 0,000101451 | 0,000224754 |
| RAP2B     | 0,487699091  | 6,460914719 | 0,000101802 | 0,000225436 |
| LRRC8D    | 0,383309848  | 5,31537143  | 0,000101825 | 0,000225436 |
| LASP1     | 0,412529649  | 8,841020615 | 0,00010251  | 0,00022688  |
| ATMIN     | 0,24548134   | 6,507162107 | 0,000102821 | 0,000227495 |
| C14orf2   | 0,458815227  | 6,308095122 | 0,000103256 | 0,000228382 |
| CTNNBIP1  | -0,466986547 | 6,416441797 | 0,000103988 | 0,000229925 |
| TET2      | -0,386616992 | 5,234117276 | 0,000104021 | 0,000229925 |
| PPP1R10   | -0,407708724 | 6,8862427   | 0,000104182 | 0,000230205 |
| NBEAL2    | -0,55188572  | 6,710906689 | 0,000105095 | 0,000232149 |
| FLT3LG    | -0,462759493 | 3,165772177 | 0,000105357 | 0,000232652 |
| CDR2      | 0,400476373  | 5,539708241 | 0,000106502 | 0,000235105 |
| MAN2A1    | 0,63995695   | 5,71503898  | 0,000107718 | 0,000237711 |
| PAG1      | -0,554393354 | 6,072782576 | 0,000110628 | 0,000244054 |
| IL10RA    | -0,597536053 | 6,022645149 | 0,000111958 | 0,00024691  |
| GPD2      | 0,32236361   | 6,532803181 | 0,000112046 | 0,000247023 |
| ESYT1     | -0,286621045 | 7,689927548 | 0,000112603 | 0,000248171 |
| UBE2R2    | 0,313070169  | 7,032068629 | 0,000113891 | 0,000250929 |



|          |              |             |             |             |
|----------|--------------|-------------|-------------|-------------|
| RRP8     | 0,321032542  | 4,443430162 | 0,000114435 | 0,000252046 |
| PRR24    | -0,417933931 | 3,260995108 | 0,000115424 | 0,000254141 |
| TBC1D22A | -0,284286927 | 5,447478779 | 0,000115785 | 0,000254854 |
| NAA16    | -0,387075092 | 4,085419412 | 0,000116057 | 0,000255344 |
| APLP2    | -0,465470042 | 10,75667151 | 0,000116082 | 0,000255344 |
| GBA2     | -0,351497072 | 5,975646995 | 0,000116449 | 0,000256067 |
| LIMD2    | 0,631199433  | 5,327820883 | 0,000116576 | 0,000256264 |
| HARS2    | 0,311810285  | 5,401767924 | 0,000117669 | 0,000258566 |
| BTG1     | -0,447702586 | 8,076278076 | 0,000117699 | 0,000258566 |
| STRAP    | 0,457291129  | 7,371904498 | 0,000119374 | 0,000262161 |
| ZNF768   | 0,37263176   | 5,738566821 | 0,000120007 | 0,000263468 |
| PCIF1    | -0,235403456 | 6,143097919 | 0,000120462 | 0,00026438  |
| PSMC5    | 0,287881485  | 7,321550462 | 0,000120529 | 0,000264442 |
| ABCC10   | 0,371151212  | 5,273353772 | 0,000120767 | 0,000264879 |
| SPSB1    | 0,574235476  | 6,31660788  | 0,000120977 | 0,000265254 |
| ZNF710   | 0,696345433  | 5,332684763 | 0,000121102 | 0,000265443 |
| ZMPSTE24 | 0,324087647  | 6,965270216 | 0,000121384 | 0,000265956 |
| IPO7     | 0,3683106    | 8,196419007 | 0,000121414 | 0,000265956 |
| SEC62    | -0,25830704  | 8,221565786 | 0,000121497 | 0,000266052 |
| GIMAP2   | -0,568228455 | 4,467081209 | 0,000122377 | 0,000267895 |
| HIPK2    | -0,561659257 | 7,062349265 | 0,00012394  | 0,000271228 |
| MAGT1    | 0,420788016  | 7,916449593 | 0,000124011 | 0,000271296 |
| TNPO1    | 0,292386345  | 7,334562705 | 0,00012524  | 0,000273896 |
| BAG4     | 0,502452388  | 3,982927518 | 0,000125755 | 0,000274864 |
| MAP4K2   | -0,428327574 | 4,998023727 | 0,000125763 | 0,000274864 |
| GUSBP3   | -0,360229333 | 3,360464688 | 0,000125963 | 0,000275213 |
| KLHL5    | 0,511041858  | 6,06794013  | 0,000126035 | 0,000275282 |
| SGK196   | 0,725237598  | 1,666092448 | 0,000126118 | 0,000275375 |
| POT1     | 0,441136628  | 5,129693255 | 0,000126257 | 0,000275592 |
| IFRD2    | 0,402643694  | 6,1498818   | 0,000127436 | 0,000278075 |
| UBE2J2   | 0,329715848  | 5,967246299 | 0,000127995 | 0,000279205 |
| GNB2L1   | 0,459577943  | 10,57114208 | 0,000128548 | 0,000280323 |
| PXN      | -0,408390858 | 7,654490763 | 0,000128634 | 0,000280421 |
| PTPLAD1  | 0,466833754  | 7,530606358 | 0,000128681 | 0,000280434 |
| THYN1    | 0,454674576  | 5,577510326 | 0,00012961  | 0,000282368 |
| NPRL3    | 0,343419947  | 5,909048223 | 0,000130307 | 0,000283796 |
| RNF7     | 0,394029456  | 6,500243254 | 0,0001322   | 0,000287827 |
| GFM1     | 0,296046673  | 6,171169597 | 0,000132558 | 0,000288514 |
| PDCD4    | -0,403010986 | 6,544324383 | 0,00013311  | 0,000289622 |
| MLF2     | 0,41872481   | 7,940848188 | 0,000134076 | 0,00029163  |
| DAAM1    | -0,424569001 | 5,083095295 | 0,00013466  | 0,000292808 |
| CABIN1   | -0,399872687 | 6,702759955 | 0,000135604 | 0,000294766 |
| FMNL2    | -0,448001957 | 6,506431903 | 0,000136    | 0,000295533 |
| ECHDC2   | -0,48424347  | 5,638670612 | 0,000136427 | 0,000296366 |
| TCEAL3   | -0,420212523 | 4,853048681 | 0,000139201 | 0,000302297 |
| CPE      | 1,062935378  | 7,688939529 | 0,000139721 | 0,00030333  |
| POLD4    | 0,454143371  | 6,839197334 | 0,000139931 | 0,00030369  |
| RUFY2    | -0,250543536 | 4,458532162 | 0,000141591 | 0,000307193 |
| ARID1B   | -0,374314254 | 6,59676508  | 0,000142287 | 0,000308606 |
| TMEM87A  | -0,411960973 | 7,589183419 | 0,000143278 | 0,00031062  |

|          |              |             |             |             |
|----------|--------------|-------------|-------------|-------------|
| WDR5     | 0,364842484  | 5,77660089  | 0,000143307 | 0,00031062  |
| ZFR      | 0,217823358  | 7,080626037 | 0,000143377 | 0,000310674 |
| TCEAL4   | -0,362352596 | 6,484771888 | 0,000143664 | 0,000311196 |
| HAUS4    | 0,466567323  | 6,480492119 | 0,000143821 | 0,000311437 |
| ARL1     | 0,379794867  | 7,230208683 | 0,000146724 | 0,000317622 |
| MAGEH1   | -0,491598998 | 5,205614021 | 0,000146901 | 0,000317885 |
| TXNL4A   | 0,40145845   | 5,638768162 | 0,000146939 | 0,000317885 |
| PACSIN2  | -0,448076956 | 6,728021064 | 0,00014773  | 0,000319497 |
| C6orf89  | -0,253704267 | 7,430107452 | 0,000148712 | 0,000321517 |
| NCOR2    | -0,431016237 | 8,462522095 | 0,000148815 | 0,000321639 |
| ARFGEF1  | 0,359151553  | 6,865844996 | 0,000149962 | 0,000324014 |
| NDUFV2   | 0,463181452  | 7,126541441 | 0,000150266 | 0,000324569 |
| SLC25A24 | -0,435735346 | 6,341056867 | 0,00015065  | 0,000325296 |
| KIAA1143 | -0,249922867 | 6,088867772 | 0,000150972 | 0,000325887 |
| HES4     | 0,757572408  | 2,867266926 | 0,000153179 | 0,000330547 |
| CDC42SE1 | 0,354692248  | 7,74739355  | 0,000153355 | 0,000330822 |
| ATP13A1  | 0,335445515  | 6,615673468 | 0,000155799 | 0,000335987 |
| PIN1     | -0,31338034  | 5,528712343 | 0,000156    | 0,000336315 |
| ABHD4    | 0,415398425  | 6,087787367 | 0,000156077 | 0,000336375 |
| IFI6     | 0,917858043  | 8,47709303  | 0,000156134 | 0,000336391 |
| POLR3A   | 0,397291405  | 4,951204095 | 0,000156514 | 0,000337104 |
| INF2     | -0,454348644 | 7,285457713 | 0,000156837 | 0,000337643 |
| GPCPD1   | -0,560863629 | 6,824388247 | 0,000156864 | 0,000337643 |
| ZSWIM6   | -0,396239366 | 5,076790686 | 0,000157525 | 0,000338959 |
| PHF3     | -0,354290408 | 6,689752051 | 0,000157705 | 0,00033924  |
| SERINC5  | -0,571646329 | 4,003936042 | 0,000158839 | 0,000341572 |
| PTP4A2   | 0,310698196  | 7,677080852 | 0,000159077 | 0,000341975 |
| RRN3     | 0,277113391  | 6,060405673 | 0,000160947 | 0,000345887 |
| PCBD1    | 0,410605387  | 6,727163206 | 0,000161262 | 0,000346453 |
| TMEM167A | 0,334150417  | 7,448941278 | 0,000161792 | 0,000347483 |
| TMEM41B  | -0,373611789 | 6,57946596  | 0,000162334 | 0,000348538 |
| RAF1     | -0,194119029 | 7,04468764  | 0,000162397 | 0,000348564 |
| FAM122B  | 0,331074731  | 5,571874692 | 0,000162486 | 0,000348644 |
| ZNF544   | 0,426220603  | 5,026659854 | 0,000162996 | 0,000349629 |
| IFT74    | -0,373703311 | 3,974056336 | 0,000164966 | 0,000353737 |
| TMEM141  | 0,742362458  | 6,492628449 | 0,00016506  | 0,000353737 |
| CDK5RAP3 | 0,392012736  | 6,812664581 | 0,000165067 | 0,000353737 |
| THAP4    | 0,27630707   | 6,036823667 | 0,000165772 | 0,000355137 |
| DYNLT1   | 0,503514843  | 7,00010525  | 0,00016606  | 0,000355642 |
| HP1BP3   | -0,257988436 | 7,881401752 | 0,000166403 | 0,000356264 |
| MRPL20   | 0,353941893  | 6,441041812 | 0,000166631 | 0,000356641 |
| DHX15    | 0,28319346   | 7,422045033 | 0,000167393 | 0,000358158 |
| MMAB     | -0,40724327  | 5,51196287  | 0,00017044  | 0,000364563 |
| KIAA2013 | 0,286384368  | 6,600101477 | 0,000170845 | 0,000365315 |
| SEPHS1   | 0,311402614  | 6,056595272 | 0,000172978 | 0,000369761 |
| TIMM13   | 0,365172213  | 5,900299277 | 0,000173315 | 0,000370364 |
| PIK3C2B  | -0,548377579 | 5,855902928 | 0,00017376  | 0,0003712   |
| NANS     | 0,447081771  | 6,291792616 | 0,000174233 | 0,000372094 |
| RPL18    | 0,50458957   | 9,763998646 | 0,000175071 | 0,000373766 |
| EEF2K    | -0,345885114 | 6,320527824 | 0,000175187 | 0,000373896 |

|          |              |             |             |             |
|----------|--------------|-------------|-------------|-------------|
| PPP3CA   | -0,35067295  | 6,73457768  | 0,000176562 | 0,000376714 |
| CHCHD3   | 0,338533842  | 6,087410424 | 0,000178586 | 0,000380913 |
| SMNDC1   | 0,274679627  | 5,57322663  | 0,000178876 | 0,000381413 |
| BCAS3    | -0,38035612  | 5,326196145 | 0,000179318 | 0,000382228 |
| NXF1     | -0,306714961 | 6,440420565 | 0,000179371 | 0,000382228 |
| RAD1     | 0,3597707    | 5,993813435 | 0,000179485 | 0,000382352 |
| TK2      | -0,403394399 | 5,8341978   | 0,000179621 | 0,000382523 |
| EIF4A1   | 0,328902794  | 9,603146097 | 0,000179739 | 0,000382654 |
| SDHAF2   | 0,311207124  | 5,712332716 | 0,00018069  | 0,000384558 |
| RFWD2    | 0,284387277  | 6,196744952 | 0,000181841 | 0,000386887 |
| NUP93    | 0,282758036  | 5,912018532 | 0,000184453 | 0,000392322 |
| SPAG7    | -0,343653648 | 5,822124174 | 0,000185401 | 0,000394215 |
| ZNF621   | -0,31418885  | 5,144483192 | 0,000185654 | 0,00039463  |
| WTIP     | -0,627922538 | 4,039243131 | 0,000187172 | 0,000397734 |
| PTPN13   | -0,949518395 | 7,043403883 | 0,000187312 | 0,000397906 |
| TIMM44   | 0,306929958  | 4,969431818 | 0,00018974  | 0,000402939 |
| LLGL1    | 0,353367572  | 5,526757337 | 0,00019036  | 0,00040413  |
| RPL35A   | 0,508458535  | 9,470707561 | 0,000190592 | 0,000404415 |
| IKZF5    | -0,321403266 | 5,132998022 | 0,000190613 | 0,000404415 |
| ATP1A1   | -0,479298312 | 10,33812777 | 0,000192181 | 0,000407615 |
| APBB1IP  | -0,577785492 | 5,023801874 | 0,000192323 | 0,000407714 |
| STK24    | 0,352907311  | 7,679794434 | 0,000192347 | 0,000407714 |
| SRA1     | 0,403974458  | 5,680121965 | 0,000195198 | 0,000413628 |
| FNIP1    | -0,302850124 | 5,358263062 | 0,000199701 | 0,000423038 |
| SEPN1    | -0,33815063  | 8,01907311  | 0,000200088 | 0,000423728 |
| TNRC6C   | -0,506717693 | 4,790251288 | 0,000200334 | 0,000424115 |
| PARP14   | -0,370518094 | 7,764901612 | 0,000200799 | 0,000424969 |
| SLC7A1   | 0,571982068  | 6,084846001 | 0,000204076 | 0,000431771 |
| C18orf21 | 0,414649429  | 4,151211635 | 0,000204783 | 0,000433014 |
| SLC25A40 | 0,438420456  | 3,790935679 | 0,00020481  | 0,000433014 |
| CXCL10   | 1,20775366   | 5,978356285 | 0,000204854 | 0,000433014 |
| SKA2     | 0,411805092  | 5,819722917 | 0,00020541  | 0,000434053 |
| NDUFS3   | 0,357376167  | 6,518206087 | 0,000206715 | 0,000436676 |
| KIAA1033 | -0,256013012 | 6,269374848 | 0,000207106 | 0,000437367 |
| GMFB     | -0,351176736 | 6,824053673 | 0,000207916 | 0,00043894  |
| KCTD2    | -0,305368535 | 5,960203444 | 0,000208954 | 0,000440996 |
| C4orf52  | 0,465631106  | 5,184507946 | 0,000211129 | 0,000445449 |
| SDHAF1   | 0,525961521  | 4,151149429 | 0,000211315 | 0,000445703 |
| STAU1    | 0,281318813  | 7,810128834 | 0,000212226 | 0,000447485 |
| DPF2     | 0,22485286   | 6,183360329 | 0,000212405 | 0,000447724 |
| SAP30    | 0,499746267  | 3,274906047 | 0,000213027 | 0,000448898 |
| HCLS1    | -0,520579717 | 6,615179412 | 0,000213326 | 0,000449388 |
| MTR      | -0,360731569 | 6,112368135 | 0,00021362  | 0,000449868 |
| ZDHHC5   | 0,252349187  | 7,486136117 | 0,000214006 | 0,000450425 |
| DMXL2    | -0,438882386 | 5,521106784 | 0,000214016 | 0,000450425 |
| RPL13    | 0,5039526    | 10,63846043 | 0,000214743 | 0,000451815 |
| CYB5A    | -0,768971084 | 8,368051481 | 0,000214985 | 0,000452185 |
| CIR1     | -0,276995666 | 6,139273333 | 0,000215079 | 0,000452243 |
| PDE4DIP  | -0,359154927 | 7,308910233 | 0,000217443 | 0,000457073 |
| ABHD2    | -0,626033664 | 8,711867908 | 0,000217997 | 0,000457959 |

|           |              |             |             |             |
|-----------|--------------|-------------|-------------|-------------|
| SYT11     | -0,577612547 | 5,120659118 | 0,000217999 | 0,000457959 |
| RTN4      | -0,336026595 | 8,654399719 | 0,000219641 | 0,000461266 |
| HSF4      | 0,835104293  | 3,46565954  | 0,000222908 | 0,000467983 |
| FRMD8     | 0,271389589  | 5,915921735 | 0,000223431 | 0,000468937 |
| ZNF33B    | -0,39993056  | 5,603534644 | 0,000223502 | 0,000468941 |
| ZNF808    | -0,336392716 | 3,955598836 | 0,000223579 | 0,000468959 |
| PRPS1     | 0,310275768  | 5,971134279 | 0,000223868 | 0,00046942  |
| BTBD2     | 0,293508635  | 6,802097318 | 0,000224059 | 0,000469632 |
| C1orf50   | 0,392848614  | 3,521879792 | 0,000224107 | 0,000469632 |
| KLHL2     | -0,38577473  | 5,519792901 | 0,000224283 | 0,000469856 |
| RPL24     | 0,565627148  | 9,822833275 | 0,000224443 | 0,000470049 |
| C4orf34   | 0,51933978   | 6,493241703 | 0,000224793 | 0,000470636 |
| MKL1      | -0,303976704 | 6,113144411 | 0,000225926 | 0,000472864 |
| MEPCE     | -0,29780265  | 6,108673989 | 0,000226552 | 0,000474029 |
| PACS2     | -0,285848018 | 6,522427238 | 0,000226919 | 0,000474622 |
| CCDC23    | 0,482607077  | 4,627563656 | 0,000226975 | 0,000474622 |
| PCGF3     | 0,312805665  | 6,043044645 | 0,00022705  | 0,000474633 |
| ATOX1     | 0,403249741  | 5,644839116 | 0,000228364 | 0,000477115 |
| GOLGA4    | -0,416932016 | 6,971379861 | 0,000228377 | 0,000477115 |
| PLBD1     | -0,720587722 | 6,627199237 | 0,000230622 | 0,000481595 |
| DAPK3     | -0,404318333 | 5,937456177 | 0,000230663 | 0,000481595 |
| SCCPDH    | 0,547405344  | 6,693402966 | 0,000233028 | 0,000486385 |
| RFC1      | -0,317333775 | 6,353028689 | 0,000233169 | 0,00048653  |
| VRK2      | 0,316369954  | 5,217104968 | 0,000234527 | 0,000489214 |
| RPL7A     | 0,489810504  | 10,77035804 | 0,00023481  | 0,000489572 |
| SPAST     | 0,29296554   | 5,5591659   | 0,000234842 | 0,000489572 |
| PSMC1     | 0,290936067  | 7,378244525 | 0,000235052 | 0,000489858 |
| EIF2S2    | 0,266366054  | 7,428569002 | 0,000237116 | 0,00049401  |
| SUMO1P3   | 0,326447656  | 3,16328624  | 0,000238805 | 0,000497377 |
| NIPSNAP3A | -0,455300133 | 5,307182987 | 0,000239707 | 0,000499103 |
| TAF1C     | -0,37497286  | 5,439039455 | 0,00023987  | 0,00049929  |
| TRAK1     | -0,446292925 | 6,775891289 | 0,0002407   | 0,000500864 |
| ZNF12     | 0,312460435  | 5,524546224 | 0,000241042 | 0,000501424 |
| DVL3      | 0,401360748  | 6,948360581 | 0,000241317 | 0,000501843 |
| USP4      | -0,236231829 | 6,456372882 | 0,000242663 | 0,000504487 |
| PIP5K1A   | 0,377768499  | 6,789399011 | 0,000243958 | 0,000507026 |
| SERPINF1  | 0,742838772  | 7,519615603 | 0,000248163 | 0,000515608 |
| VDR       | 0,60097645   | 6,237637154 | 0,000249229 | 0,000517664 |
| HSD17B11  | -0,511152031 | 7,544602425 | 0,000249372 | 0,000517805 |
| UBE2M     | 0,328823405  | 6,260755219 | 0,00025109  | 0,000521212 |
| RAB5A     | -0,239154311 | 6,494270582 | 0,000252034 | 0,000523012 |
| EDF1      | 0,338304757  | 7,977690859 | 0,00025282  | 0,000524484 |
| UTP20     | 0,458860377  | 5,567618606 | 0,000252978 | 0,000524653 |
| FKBP1A    | -0,275296446 | 8,505147943 | 0,000253212 | 0,000524979 |
| PHC1      | -0,296754737 | 6,875742442 | 0,000253957 | 0,000526362 |
| PSMA4     | 0,382389029  | 7,394979475 | 0,000256428 | 0,000531323 |
| SCFD1     | 0,368199369  | 6,301081609 | 0,000259264 | 0,000537036 |
| IMPA2     | 0,640106659  | 6,668531386 | 0,000259697 | 0,00053777  |
| TRANK1    | -0,490503158 | 5,780032848 | 0,000260456 | 0,000539176 |
| PPP1CC    | 0,305302272  | 7,639149256 | 0,000262273 | 0,000542774 |

|           |              |             |             |             |
|-----------|--------------|-------------|-------------|-------------|
| C9orf142  | 0,411251863  | 4,876569826 | 0,000264383 | 0,000546974 |
| ZFX       | -0,305352302 | 5,370809881 | 0,000265603 | 0,000549332 |
| KIAA1429  | 0,261514406  | 6,526620805 | 0,000265737 | 0,000549442 |
| GNB4      | -0,433515501 | 6,442666368 | 0,000267174 | 0,000552245 |
| IFT80     | -0,381909325 | 5,652144724 | 0,00026748  | 0,000552711 |
| CDC42BPB  | -0,401277654 | 7,666973934 | 0,000267663 | 0,000552921 |
| ACAA1     | -0,40013251  | 6,36207655  | 0,000268409 | 0,000554294 |
| ZNF28     | 0,43987398   | 4,806542294 | 0,000269463 | 0,000556304 |
| HSPA7     | 0,915600937  | 3,701673643 | 0,00026956  | 0,000556334 |
| B4GALT1   | 0,44513083   | 8,762219669 | 0,000270553 | 0,000558216 |
| BAG2      | 0,708631638  | 4,585902605 | 0,0002719   | 0,000560825 |
| SLC30A7   | 0,282811422  | 6,081336498 | 0,000273638 | 0,000564239 |
| PLEKHG2   | 0,645835816  | 6,149017884 | 0,000274221 | 0,00056527  |
| RUVBL2    | 0,341612212  | 6,681760541 | 0,000274702 | 0,000566091 |
| EZR       | -0,508078982 | 9,863077065 | 0,000275729 | 0,000568034 |
| C15orf38  | -0,354906196 | 4,774773734 | 0,000275915 | 0,000568247 |
| TPRG1L    | -0,356191824 | 6,684107396 | 0,000278344 | 0,000573076 |
| RPS26     | 0,668549636  | 8,753954375 | 0,000282448 | 0,000581351 |
| LAS1L     | 0,297047736  | 5,734785298 | 0,000283507 | 0,000583353 |
| RPL13AP20 | 0,519048346  | 5,202382674 | 0,000283812 | 0,000583804 |
| MARCH8    | -0,440604251 | 4,176557705 | 0,00028464  | 0,000585331 |
| FBXO8     | -0,299590415 | 5,011622985 | 0,000287148 | 0,000590312 |
| LMBRD2    | 0,53563405   | 3,872248553 | 0,000288279 | 0,000592457 |
| GLTSCR2   | -0,377842359 | 8,314427471 | 0,000289791 | 0,000595385 |
| DFFA      | 0,275041985  | 5,574888487 | 0,000291704 | 0,000599136 |
| NFIB      | -0,510409052 | 6,980491873 | 0,000291811 | 0,000599175 |
| MARK4     | 0,333111531  | 5,542054704 | 0,00029213  | 0,00059965  |
| SGSM2     | -0,44212891  | 5,986326225 | 0,00029282  | 0,000600838 |
| NCOA7     | -0,623901165 | 7,890347932 | 0,000292886 | 0,000600838 |
| DCK       | 0,466524625  | 5,645575965 | 0,000296173 | 0,000607399 |
| CD86      | -0,589905739 | 5,212402797 | 0,000296415 | 0,000607712 |
| ZBTB44    | -0,300970238 | 6,415142938 | 0,000298502 | 0,000611808 |
| FAM111A   | -0,330839044 | 5,874493394 | 0,000301651 | 0,000618076 |
| NCSTN     | 0,312118448  | 7,928921028 | 0,000302195 | 0,000619004 |
| RNF215    | 0,408305781  | 4,002100498 | 0,000304912 | 0,000624383 |
| S100A6    | 0,79070189   | 11,30321992 | 0,000305713 | 0,000625836 |
| PRKAG1    | 0,34124134   | 6,32587248  | 0,000307334 | 0,000628964 |
| SENP7     | -0,344522063 | 4,549683432 | 0,000310261 | 0,000634764 |
| CAPZA1    | 0,317007305  | 8,058644066 | 0,000311537 | 0,000637184 |
| MTDH      | 0,291282618  | 7,977400843 | 0,000312082 | 0,000638106 |
| FRMD6     | 0,730615417  | 5,259984221 | 0,000312541 | 0,000638853 |
| CCNJ      | 0,394874438  | 3,954804758 | 0,000313308 | 0,00064023  |
| LONP1     | 0,321920692  | 6,774847381 | 0,000313952 | 0,000641354 |
| HLA-DRB1  | -0,693498102 | 10,7973619  | 0,000314648 | 0,000642582 |
| POLR1A    | 0,427605342  | 5,351617836 | 0,00031483  | 0,000642763 |
| GRSF1     | 0,245427685  | 7,172644822 | 0,000316234 | 0,000645435 |
| TM9SF3    | 0,323450575  | 8,470980305 | 0,000316691 | 0,00064616  |
| MBD2      | -0,282296097 | 6,534118647 | 0,000316779 | 0,00064616  |
| SLC27A1   | -0,423111213 | 5,654209178 | 0,000316989 | 0,000646395 |
| PEX10     | 0,308372054  | 5,189341788 | 0,000318459 | 0,000649199 |

|           |              |             |             |             |
|-----------|--------------|-------------|-------------|-------------|
| BCAP29    | -0,38764187  | 6,50186854  | 0,000318835 | 0,000649772 |
| MOCS3     | 0,298787831  | 4,148913315 | 0,000319633 | 0,000651202 |
| CD9       | -0,549225677 | 9,306345322 | 0,000320078 | 0,000651915 |
| MRPS27    | 0,317446365  | 6,448804882 | 0,000321639 | 0,000654898 |
| RPLP2     | 0,426403699  | 9,792700931 | 0,000323321 | 0,000658128 |
| HUS1      | 0,269375654  | 4,589297765 | 0,000323966 | 0,000659244 |
| VCAM1     | 0,809354046  | 5,891640009 | 0,00032592  | 0,000663023 |
| SSBP2     | -0,474260377 | 4,452301953 | 0,000326805 | 0,000664623 |
| LTBP2     | -0,665523841 | 8,543722628 | 0,00032845  | 0,000667771 |
| PSMG4     | 0,36490822   | 3,994933932 | 0,000330158 | 0,000671042 |
| LILRB2    | -0,635385167 | 4,550494818 | 0,000331469 | 0,000673506 |
| ULK1      | 0,408709218  | 6,241538311 | 0,000333146 | 0,000676711 |
| SLC25A1   | 0,373521783  | 6,596731175 | 0,000333556 | 0,000677343 |
| PEPD      | -0,3365302   | 6,641160824 | 0,000334698 | 0,00067946  |
| FBXO33    | -0,382701964 | 4,973477634 | 0,00033524  | 0,000680359 |
| MSL2      | -0,27979961  | 5,516458455 | 0,000335417 | 0,000680515 |
| KIAA0196  | 0,32915846   | 6,464257814 | 0,000337682 | 0,000684905 |
| PITPNM1   | 0,454183446  | 6,373808361 | 0,000338181 | 0,000685713 |
| NASP      | 0,396992545  | 6,905633621 | 0,000340072 | 0,000689344 |
| ARHGAP33  | 0,734122383  | 3,154934034 | 0,000340398 | 0,0006898   |
| RNASET2   | 0,549354267  | 6,675422573 | 0,000341559 | 0,000691947 |
| PNKP      | 0,313339314  | 5,122813473 | 0,00034224  | 0,00069312  |
| GGPS1     | 0,283908843  | 6,088874018 | 0,000345431 | 0,000699375 |
| CENPV     | 0,800055313  | 3,437170999 | 0,000350636 | 0,000709545 |
| PCDHB19P  | -0,432191474 | 0,314022608 | 0,000350663 | 0,000709545 |
| L3MBTL4   | -0,60042787  | 3,538951512 | 0,000351293 | 0,00071061  |
| EIF4ENIF1 | -0,23505856  | 5,116985672 | 0,000355185 | 0,000718271 |
| KBTBD2    | -0,274938209 | 6,346809729 | 0,000355382 | 0,000718454 |
| NDOR1     | 0,351644285  | 5,222284104 | 0,000357406 | 0,000722333 |
| VOPPI     | 0,378127895  | 7,445915226 | 0,000358696 | 0,000724726 |
| BLNK      | 0,544063734  | 3,864901532 | 0,000360743 | 0,000728645 |
| ZNF251    | 0,416701797  | 4,2604324   | 0,00036166  | 0,000730281 |
| BTBD10    | 0,283297586  | 5,375012338 | 0,000363481 | 0,000733741 |
| PCNXL2    | 0,470699636  | 4,14904663  | 0,00036371  | 0,000733987 |
| SEH1L     | 0,338456523  | 5,895072339 | 0,000364585 | 0,000735533 |
| MAN2B2    | -0,318580617 | 6,854553292 | 0,000365706 | 0,000737578 |
| NEAT1     | -0,715829553 | 9,17186567  | 0,000368269 | 0,000742526 |
| DEK       | 0,296718921  | 7,609568642 | 0,00036918  | 0,000744144 |
| LYRM4     | 0,467453811  | 5,128064079 | 0,000371105 | 0,000747804 |
| DDX54     | 0,32280932   | 6,597413918 | 0,000374376 | 0,000754171 |
| IFI16     | 0,652224381  | 7,754430763 | 0,000376313 | 0,00075785  |
| POFUT1    | 0,311087182  | 6,655353283 | 0,000376786 | 0,000758578 |
| MVD       | -0,383402082 | 5,558636036 | 0,000378336 | 0,000761474 |
| SRGN      | -0,676739178 | 8,335839983 | 0,000380119 | 0,000764837 |
| C18orf8   | -0,307815671 | 5,095265546 | 0,000383719 | 0,000771853 |
| SYNGR2    | 0,487659681  | 8,994814929 | 0,000385651 | 0,00077551  |
| XBP1      | 0,556331688  | 9,359110445 | 0,000387185 | 0,000778365 |
| PRMT7     | 0,312578879  | 5,04954904  | 0,000388217 | 0,000780028 |
| LRP6      | -0,452284542 | 5,966412823 | 0,000388241 | 0,000780028 |
| TAB2      | -0,261926015 | 7,042885    | 0,000389264 | 0,000781854 |

|          |              |             |             |             |
|----------|--------------|-------------|-------------|-------------|
| BAZ2B    | -0,362897634 | 5,698494728 | 0,000389905 | 0,00078291  |
| ODC1     | 0,940917743  | 8,318235382 | 0,000390216 | 0,000783303 |
| FAM40A   | -0,254932242 | 5,245589721 | 0,000393093 | 0,000788846 |
| PDE4B    | -0,599069869 | 5,26149083  | 0,000394855 | 0,000792149 |
| FAM126A  | 0,670599959  | 5,920896287 | 0,000396794 | 0,000795806 |
| COPS5    | 0,367186822  | 6,217470489 | 0,000397927 | 0,000797843 |
| ARPC2    | -0,281352095 | 8,723122909 | 0,00039936  | 0,00080048  |
| SEC63    | -0,285441168 | 7,342214289 | 0,000401899 | 0,000805333 |
| UQCC     | 0,283792851  | 5,620340222 | 0,000405229 | 0,000811767 |
| SF3A1    | -0,274542184 | 7,611842531 | 0,000405393 | 0,000811858 |
| SAFB2    | -0,341186609 | 5,891574457 | 0,000411041 | 0,000822927 |
| CD82     | -0,51608314  | 6,740925961 | 0,000411363 | 0,00082333  |
| MRPL33   | 0,517357813  | 5,903176946 | 0,000411701 | 0,000823764 |
| FDX1     | -0,344084622 | 5,533246783 | 0,000414251 | 0,000828623 |
| MRPS9    | 0,249206638  | 5,026672535 | 0,000414737 | 0,000829353 |
| COX7B    | 0,586474869  | 6,948115947 | 0,000416691 | 0,000832849 |
| FMNL1    | -0,473406258 | 6,271529898 | 0,00041673  | 0,000832849 |
| DEAF1    | 0,368856099  | 5,241261695 | 0,00042215  | 0,000843434 |
| SMU1     | -0,223318184 | 6,75976507  | 0,000424462 | 0,000847804 |
| COX8A    | 0,393550393  | 7,474112691 | 0,000427499 | 0,000853622 |
| ESRRA    | 0,363469758  | 6,021147826 | 0,000429296 | 0,000856959 |
| CIITA    | -0,575633035 | 5,510870758 | 0,000434208 | 0,00086651  |
| RPUSD3   | 0,30167748   | 4,949415571 | 0,000434446 | 0,000866731 |
| GPX4     | 0,43798262   | 8,449670407 | 0,000435945 | 0,000869468 |
| RIC8A    | 0,240748325  | 7,10844306  | 0,000438404 | 0,000874116 |
| NCKAP1   | 0,271084053  | 8,11297604  | 0,000439034 | 0,000875115 |
| TRIM4    | -0,314787607 | 5,755009721 | 0,000439555 | 0,000875899 |
| HAUS1    | 0,528833363  | 4,614600537 | 0,000440093 | 0,000876714 |
| TYMP     | 0,537868293  | 7,456648914 | 0,000445332 | 0,000886892 |
| PDHX     | 0,302959384  | 5,355129065 | 0,000447107 | 0,000890167 |
| SRI      | 0,501108549  | 7,557329574 | 0,000447692 | 0,000891073 |
| KIAA1432 | -0,341233158 | 5,218727092 | 0,000451107 | 0,000897607 |
| DIP2A    | -0,305257319 | 5,539830614 | 0,000451289 | 0,000897708 |
| NAA35    | 0,265226485  | 4,730007199 | 0,000455095 | 0,000905013 |
| GSK3A    | 0,280879926  | 6,657205539 | 0,00045794  | 0,000910406 |
| PMEPA1   | 0,608766369  | 7,299668907 | 0,000466155 | 0,000926425 |
| RPS4X    | 0,45577377   | 10,95591451 | 0,000466269 | 0,000926425 |
| NSL1     | 0,360279005  | 5,781673494 | 0,000466522 | 0,000926657 |
| SMN1     | 0,364482527  | 1,937041609 | 0,000467226 | 0,000927786 |
| NID2     | 0,711750577  | 4,779962597 | 0,000468202 | 0,000929453 |
| GPSM1    | -0,481596774 | 4,591792441 | 0,000470967 | 0,00093467  |
| HIF1AN   | -0,296711814 | 6,216010464 | 0,000472172 | 0,000936788 |
| RHOQ     | -0,321562042 | 7,025040985 | 0,000477514 | 0,000947111 |
| NUPL1    | -0,3355118   | 6,560283971 | 0,000479248 | 0,000950274 |
| DIS3L    | -0,263172717 | 5,302691633 | 0,000481602 | 0,00095447  |
| MRPS31   | -0,275605813 | 4,33081332  | 0,000481644 | 0,00095447  |
| DMTF1    | -0,331480623 | 5,502970273 | 0,000485012 | 0,000960866 |
| AARS2    | 0,323765372  | 4,981092198 | 0,000487687 | 0,000965883 |
| ATP2B1   | -0,475413393 | 6,209237849 | 0,000488355 | 0,000966694 |
| MITD1    | 0,371501337  | 4,180825237 | 0,00048838  | 0,000966694 |

|          |              |             |             |             |
|----------|--------------|-------------|-------------|-------------|
| FPGS     | 0,315838906  | 6,426427485 | 0,000489897 | 0,000969415 |
| NCKIPSD  | 0,295117403  | 5,053661134 | 0,000492585 | 0,000974452 |
| RAP2C    | 0,313285692  | 5,952340089 | 0,000493603 | 0,000976183 |
| C9orf114 | 0,290086447  | 4,973339058 | 0,000494672 | 0,000978014 |
| LSP1     | -0,502951849 | 6,827802576 | 0,000497189 | 0,000982704 |
| ABHD3    | 0,390162258  | 5,208986974 | 0,000497359 | 0,000982736 |
| C17orf59 | -0,306935966 | 3,842631941 | 0,000497493 | 0,000982736 |
| PAPOLA   | 0,246108478  | 7,93825107  | 0,000497714 | 0,000982887 |
| MAPK12   | 0,566104771  | 4,014885122 | 0,000499645 | 0,000986416 |
| THBS1    | -0,73222659  | 9,263276621 | 0,000501392 | 0,000989578 |
| AIF1     | -0,581853392 | 5,901555026 | 0,00050322  | 0,000992898 |
| DBI      | -0,431149306 | 7,579514316 | 0,000503841 | 0,000993442 |
| MAP1B    | 0,879576077  | 6,370410736 | 0,000503856 | 0,000993442 |
| CTDSP2   | -0,361029756 | 8,666277572 | 0,000503933 | 0,000993442 |
| PTCD3    | 0,270215984  | 6,179556909 | 0,00050599  | 0,00099689  |
| NEDD8    | 0,364520014  | 7,319182715 | 0,000506016 | 0,00099689  |
| PDE8A    | -0,389223682 | 5,327836537 | 0,00050612  | 0,00099689  |
| MRPL48   | 0,498419462  | 5,017327549 | 0,000506398 | 0,000997149 |
| SET      | 0,297719135  | 8,835155537 | 0,000507468 | 0,000998967 |
| TMEM56   | -0,538865124 | 4,874551436 | 0,000508037 | 0,000999799 |
| TRIM21   | -0,322510911 | 5,507631972 | 0,000513165 | 0,0010096   |
| ASPN     | 0,825402424  | 5,44627038  | 0,000514256 | 0,001011454 |
| AHI1     | -0,361995549 | 4,453558512 | 0,000519422 | 0,00102132  |
| PWP1     | 0,251247423  | 5,854694771 | 0,000520401 | 0,00102295  |
| PIGF     | 0,403421423  | 4,781044211 | 0,000525326 | 0,001032333 |
| MYBBP1A  | 0,384561076  | 5,977604108 | 0,000525897 | 0,001033157 |
| CNOT2    | 0,361588535  | 6,519825973 | 0,000529195 | 0,001039337 |
| MRPL16   | 0,332833191  | 5,510737407 | 0,000531902 | 0,001044354 |
| DNAJC4   | 0,329570235  | 5,442913963 | 0,000532954 | 0,001046119 |
| TUBA1B   | 0,41326729   | 10,31431866 | 0,000534379 | 0,001048613 |
| RPS6KA4  | 0,354878131  | 6,023868298 | 0,000535182 | 0,001049886 |
| POMP     | 0,441192577  | 6,983438919 | 0,000536292 | 0,001051761 |
| COMMD1   | 0,397785945  | 5,119034349 | 0,000538527 | 0,001055841 |
| TRMT12   | 0,302516811  | 4,230232987 | 0,000538757 | 0,001055989 |
| ANAPC16  | -0,350490109 | 7,514434731 | 0,000541525 | 0,001060823 |
| COX11    | 0,356161296  | 6,033915258 | 0,000541535 | 0,001060823 |
| ZFHX3    | -0,482630481 | 6,120171931 | 0,000542687 | 0,001062536 |
| ZDHHC24  | 0,343077932  | 4,595761161 | 0,000542875 | 0,001062536 |
| ZFYVE21  | -0,288250186 | 5,896557101 | 0,000542876 | 0,001062536 |
| DDB1     | 0,24081037   | 8,433439459 | 0,0005484   | 0,001072991 |
| BRAF     | 0,376626701  | 3,670088339 | 0,000548533 | 0,001072991 |
| OGFOD1   | 0,217796014  | 5,843079931 | 0,000550445 | 0,001076422 |
| CCDC9    | -0,334942086 | 4,911516093 | 0,000551704 | 0,001078576 |
| WWP1     | -0,289651936 | 6,380687071 | 0,000553227 | 0,001081243 |
| SDHB     | 0,355668506  | 6,690273753 | 0,000556507 | 0,001087341 |
| HLA-DRA  | -0,66351543  | 11,61348453 | 0,000557161 | 0,001088307 |
| RBPMS    | -0,53654434  | 6,827326979 | 0,000560352 | 0,001094226 |
| NKIRAS1  | -0,313902188 | 3,803180926 | 0,000565069 | 0,001103122 |
| ZGPAT    | 0,350844902  | 5,414339095 | 0,000565966 | 0,001104558 |
| PTPRS    | -0,460154962 | 6,127874047 | 0,000566372 | 0,001105034 |



|              |              |             |             |             |
|--------------|--------------|-------------|-------------|-------------|
| PLEKHA4      | -0,516701669 | 5,014968936 | 0,000569369 | 0,001110562 |
| DHX8         | 0,296853611  | 6,306088184 | 0,000569717 | 0,001110924 |
| TMED1        | 0,343886675  | 5,220672075 | 0,000570361 | 0,001111861 |
| C11orf73     | 0,336936342  | 5,051980982 | 0,000574571 | 0,001119748 |
| MED13L       | -0,458359349 | 7,051483593 | 0,000576165 | 0,001122534 |
| GRAMD1A      | 0,475967749  | 7,341631473 | 0,000576866 | 0,001123578 |
| FAM172A      | -0,316574936 | 5,125199554 | 0,000580298 | 0,00112994  |
| RAB31        | -0,450163979 | 7,934169931 | 0,000580568 | 0,001130143 |
| SIKE1        | 0,282726641  | 5,592846523 | 0,000581515 | 0,001131664 |
| TAF4B        | 0,541885313  | 3,392893742 | 0,000583315 | 0,001134843 |
| TCFL5        | 0,376721098  | 4,261861081 | 0,000584339 | 0,001136511 |
| VPS8         | -0,25598471  | 5,454744819 | 0,000586433 | 0,001140259 |
| MED19        | 0,332739991  | 4,224336584 | 0,000588543 | 0,001143932 |
| NDUFB5       | 0,464528256  | 6,754383126 | 0,000588658 | 0,001143932 |
| NUP54        | 0,312556989  | 5,679520046 | 0,000592347 | 0,001150773 |
| SNORA8       | 0,430547221  | 4,431380531 | 0,000594266 | 0,001154173 |
| LOC100190986 | -0,551483903 | 3,303495795 | 0,000600549 | 0,001166044 |
| SMEK2        | 0,240158143  | 7,113610934 | 0,000600981 | 0,00116655  |
| ZHX1         | -0,276591258 | 5,702694573 | 0,000602025 | 0,001168027 |
| TERF2IP      | -0,271518038 | 6,544538907 | 0,000602085 | 0,001168027 |
| TNKS2        | -0,249912502 | 6,783660593 | 0,000606103 | 0,001175488 |
| EP300        | -0,360288907 | 7,170869341 | 0,000611892 | 0,001186379 |
| ARHGEF9      | -0,361122155 | 4,846739814 | 0,000615217 | 0,001192485 |
| RAB4B        | -0,318727551 | 5,340532281 | 0,000616096 | 0,00119385  |
| CRCP         | 0,249583715  | 6,185721914 | 0,000616768 | 0,001194813 |
| HSPA8        | 0,380768771  | 10,72142077 | 0,00061902  | 0,001198834 |
| RPS6         | 0,575188761  | 11,30714805 | 0,0006219   | 0,00120407  |
| COMMD4       | 0,323417216  | 6,064767247 | 0,000623348 | 0,001206531 |
| TBCA         | 0,355113152  | 6,850381673 | 0,00062881  | 0,001216757 |
| KDEL2        | 0,409251389  | 6,281444495 | 0,000632822 | 0,001224049 |
| MAGEF1       | 0,376583212  | 5,965114335 | 0,000632937 | 0,001224049 |
| ZNF394       | -0,237460758 | 4,920780856 | 0,000636773 | 0,001231119 |
| ZNF23        | -0,28462122  | 3,819941294 | 0,000644919 | 0,001246515 |
| DERA         | 0,483243703  | 6,212837405 | 0,000645869 | 0,001247817 |
| POP5         | 0,400372383  | 4,679292879 | 0,000645959 | 0,001247817 |
| C2orf68      | 0,327100266  | 6,172261363 | 0,00064783  | 0,001251077 |
| NBPF9        | -0,423031885 | 5,122983228 | 0,000648509 | 0,001252034 |
| RARRES1      | 1,13539932   | 6,146470969 | 0,00064884  | 0,001252318 |
| PPP1R12A     | -0,251195805 | 6,452807685 | 0,00065081  | 0,001255765 |
| TMCO3        | 0,414865474  | 6,593965247 | 0,000652562 | 0,00125879  |
| HSPA13       | 0,42824796   | 6,209403849 | 0,000658    | 0,001268921 |
| ASXL1        | -0,301845552 | 6,611698096 | 0,000661901 | 0,001276083 |
| CD200        | -0,483390712 | 3,849738516 | 0,000666871 | 0,001285301 |
| SEC23IP      | 0,25248645   | 6,306465174 | 0,000667351 | 0,001285659 |
| IRS1         | 0,660750165  | 5,813061038 | 0,000667434 | 0,001285659 |
| SBF2         | -0,378842952 | 5,594636292 | 0,000668876 | 0,001288073 |
| SUPT5H       | 0,34662852   | 7,821694407 | 0,000669584 | 0,001289072 |
| USP11        | -0,336115786 | 6,806556287 | 0,000672351 | 0,001294034 |
| STAT3        | -0,308864571 | 8,970236901 | 0,0006726   | 0,001294147 |
| NDUFA1       | 0,425038836  | 6,746052471 | 0,000674272 | 0,001296999 |

|          |              |             |             |             |
|----------|--------------|-------------|-------------|-------------|
| AEBP1    | 0,701579336  | 8,968680462 | 0,000677466 | 0,001302775 |
| FDX1L    | 0,362588575  | 4,134264936 | 0,000678266 | 0,001303946 |
| PMF1     | 0,382248741  | 6,229917093 | 0,000679725 | 0,001306383 |
| SLC16A1  | 0,766368744  | 5,222282971 | 0,000684248 | 0,001314448 |
| SCMH1    | -0,28904719  | 5,637650445 | 0,000684324 | 0,001314448 |
| SQSTM1   | 0,481552543  | 9,673232954 | 0,000688876 | 0,001322851 |
| C6orf48  | 0,502272981  | 7,144568706 | 0,000689631 | 0,001323928 |
| TMEM14C  | 0,466587151  | 7,43617007  | 0,000691528 | 0,001327196 |
| RFFL     | 0,287292889  | 5,846761864 | 0,000695178 | 0,001333827 |
| DENND1A  | 0,382479234  | 5,195968049 | 0,000698276 | 0,001339394 |
| SAP130   | 0,277663269  | 5,482944549 | 0,000704229 | 0,001350431 |
| SKAP1    | 0,72814216   | 4,050231913 | 0,000706933 | 0,001355071 |
| EIF2B5   | 0,249848863  | 6,126413938 | 0,000707046 | 0,001355071 |
| ZC3H4    | -0,324616789 | 5,902657121 | 0,000707977 | 0,001356383 |
| RAB2B    | -0,255298764 | 5,378092682 | 0,000708128 | 0,001356383 |
| PPP1R15B | -0,265582247 | 7,230002327 | 0,000709635 | 0,001358887 |
| MMD      | 0,604161452  | 5,411725753 | 0,000710049 | 0,001359299 |
| MANBA    | -0,345331638 | 6,12046957  | 0,000711245 | 0,001361206 |
| LARPI    | 0,395316727  | 8,0876532   | 0,000717525 | 0,00137284  |
| SLC39A3  | 0,260493049  | 4,998938982 | 0,000718254 | 0,00137385  |
| AHCTF1   | 0,308167995  | 6,493477907 | 0,00072519  | 0,001386728 |
| TPM3     | 0,294929808  | 9,537062132 | 0,000727258 | 0,001390292 |
| ENO2     | 0,61690699   | 6,437479735 | 0,000731715 | 0,00139842  |
| MTPAP    | 0,281126662  | 5,164471004 | 0,000734417 | 0,001403191 |
| HABP4    | -0,368133359 | 4,371382109 | 0,000741639 | 0,001416592 |
| OSBPL9   | -0,258773531 | 7,134108459 | 0,000743631 | 0,001419999 |
| CLCN7    | 0,346022019  | 6,98136126  | 0,000746215 | 0,001424536 |
| RPL13A   | 0,479075285  | 11,37282542 | 0,000747739 | 0,001427044 |
| PPIL4    | -0,215755453 | 5,410246291 | 0,000752224 | 0,001435204 |
| PQLC2    | 0,30013178   | 4,6744612   | 0,000754529 | 0,001439198 |
| NPDC1    | -0,580720127 | 5,831169553 | 0,000755272 | 0,001440212 |
| FAM96B   | 0,437087196  | 6,522085055 | 0,000758684 | 0,001445953 |
| FANCE    | 0,426720146  | 3,661315587 | 0,000758707 | 0,001445953 |
| MTA1     | 0,358179966  | 5,912117716 | 0,000759548 | 0,001447153 |
| PITPNC1  | 0,596399808  | 5,191779191 | 0,000760476 | 0,001448515 |
| NME7     | 0,314435686  | 5,219381728 | 0,000763423 | 0,001453723 |
| COX10    | 0,264470933  | 4,244698044 | 0,000767192 | 0,001460131 |
| CPSF3L   | 0,24084044   | 6,652520639 | 0,000767217 | 0,001460131 |
| SEC61B   | 0,360874427  | 6,787782951 | 0,000767923 | 0,001461068 |
| GTF2A2   | 0,449823427  | 5,887831226 | 0,000768759 | 0,001462251 |
| CLDN1    | 0,975217898  | 7,07264604  | 0,000769338 | 0,001462943 |
| UHMK1    | 0,503994556  | 5,145800859 | 0,000777132 | 0,001477352 |
| PPWD1    | -0,249077415 | 4,702283839 | 0,000779186 | 0,001480845 |
| FKBP8    | -0,268327256 | 8,305519517 | 0,000781785 | 0,001485369 |
| FAM126B  | -0,28249306  | 5,393014704 | 0,000790182 | 0,001500905 |
| EPS8     | 0,555119796  | 7,459460004 | 0,000793315 | 0,001506437 |
| AAAS     | 0,281575996  | 5,419923218 | 0,000798284 | 0,001515451 |
| TMEM30A  | -0,320455031 | 8,647313303 | 0,000804398 | 0,001526388 |
| PXMP2    | 0,437689482  | 3,791982302 | 0,000804493 | 0,001526388 |
| RANBP2   | -0,33021613  | 7,322390484 | 0,000804863 | 0,001526636 |

|          |              |             |             |             |
|----------|--------------|-------------|-------------|-------------|
| OTUD7B   | -0,372050533 | 5,783170262 | 0,000805071 | 0,001526636 |
| CNIH4    | 0,441833443  | 6,758967197 | 0,000809026 | 0,001533408 |
| AMD1     | -0,323262288 | 7,14073822  | 0,000809092 | 0,001533408 |
| ASCC2    | 0,34470065   | 6,637671743 | 0,000818641 | 0,001551073 |
| SPA17    | -0,535092795 | 3,866212346 | 0,000820373 | 0,001553924 |
| FXC1     | -0,315120661 | 5,921919169 | 0,000823258 | 0,001558955 |
| RPS15A   | 0,570363901  | 9,986986366 | 0,000828641 | 0,001568712 |
| ZNF532   | 0,400628105  | 6,489433813 | 0,000841004 | 0,001591676 |
| KLRK1    | -0,675288912 | 3,102043619 | 0,000842575 | 0,001594205 |
| C10orf12 | 0,435825368  | 2,828830956 | 0,000843556 | 0,00159562  |
| HSPA1B   | 0,619544901  | 8,359023823 | 0,00084816  | 0,001603883 |
| SMARCD2  | 0,277047653  | 7,132651148 | 0,000862848 | 0,001631206 |
| EML3     | -0,225409199 | 5,848440333 | 0,000869056 | 0,001642487 |
| QSER1    | 0,301791493  | 5,651610101 | 0,000873692 | 0,001650791 |
| SLC35A4  | -0,247281845 | 6,98499824  | 0,000875283 | 0,00165334  |
| GSTP1    | 0,485070611  | 9,912778329 | 0,000876492 | 0,001655165 |
| CRIP1    | -0,663615429 | 8,058787825 | 0,000881157 | 0,001663513 |
| LY6E     | 0,639663214  | 9,238006965 | 0,000881787 | 0,001664242 |
| ULK3     | 0,319643209  | 5,471537452 | 0,000882695 | 0,001665494 |
| RPS3A    | 0,642138399  | 11,47594262 | 0,000888953 | 0,001676838 |
| ANKZF1   | 0,318909913  | 5,44403831  | 0,000906024 | 0,001708566 |
| ZBTB1    | -0,2243171   | 5,759665625 | 0,000907381 | 0,001710654 |
| FNDC3B   | 0,341144191  | 7,547391563 | 0,000908972 | 0,001713178 |
| PAIP2    | -0,254399171 | 6,90599604  | 0,000910676 | 0,001715916 |
| HSPA4L   | 0,627268032  | 3,028990304 | 0,000914586 | 0,001722808 |
| USMG5    | 0,452725569  | 6,091764127 | 0,000920116 | 0,001732745 |
| PTP4A3   | 0,5554184    | 6,378254411 | 0,000921832 | 0,001735498 |
| DCP2     | -0,300712279 | 5,500895758 | 0,000928548 | 0,001747658 |
| PFKL     | 0,269379759  | 7,754834131 | 0,000934704 | 0,00175876  |
| OSGEPL1  | 0,322585802  | 3,513934458 | 0,000935409 | 0,001759601 |
| TRO      | 0,748393547  | 3,169951686 | 0,000936805 | 0,001761615 |
| HSPB11   | 0,351268762  | 4,788683973 | 0,000937201 | 0,001761615 |
| TMEM43   | -0,334169839 | 7,696264408 | 0,000937255 | 0,001761615 |
| HMG20B   | 0,291112092  | 6,213525251 | 0,000944719 | 0,001775155 |
| BBX      | -0,300888212 | 6,406674075 | 0,000949226 | 0,001783132 |
| RAP2A    | -0,339704623 | 6,223473755 | 0,000955062 | 0,001793602 |
| CCNC     | 0,427997464  | 6,628340752 | 0,000959622 | 0,001801669 |
| C11orf74 | -0,314610486 | 3,980287582 | 0,000962752 | 0,001807047 |
| SERBP1   | 0,253616456  | 8,633039977 | 0,00096778  | 0,001815986 |
| TBC1D3   | 0,431136508  | 4,775075771 | 0,000970013 | 0,001819364 |
| MAT2A    | -0,299627638 | 8,023121387 | 0,000970114 | 0,001819364 |
| STXBP3   | -0,240796592 | 5,749748514 | 0,000980572 | 0,001838471 |
| UXT      | 0,385401275  | 6,22977839  | 0,000982741 | 0,001842032 |
| CLPP     | 0,297113015  | 5,715192235 | 0,000987462 | 0,001850372 |
| FAM185A  | 0,296499344  | 2,952483641 | 0,00098826  | 0,001851359 |
| DUSP7    | -0,476891166 | 5,593225412 | 0,000990096 | 0,001854289 |
| NDUFA2   | 0,517500209  | 6,373394236 | 0,000996231 | 0,001865266 |
| DBT      | -0,248763154 | 5,623142761 | 0,000999916 | 0,001871651 |
| PFKFB3   | -0,541099316 | 7,736113983 | 0,001002698 | 0,001876344 |
| ADAM17   | -0,34197872  | 6,095162875 | 0,001003327 | 0,001877006 |

|          |              |             |             |             |
|----------|--------------|-------------|-------------|-------------|
| CWC15    | 0,290479706  | 6,086423084 | 0,001004241 | 0,0018782   |
| TMEM60   | 0,339044244  | 4,56173655  | 0,001009825 | 0,001888126 |
| CCDC142  | 0,266864949  | 5,525120209 | 0,001017048 | 0,001901111 |
| PTAR1    | -0,318896842 | 5,843361631 | 0,001021858 | 0,001909578 |
| SLC4A1AP | 0,237252342  | 5,688775054 | 0,001023791 | 0,001912667 |
| NEO1     | -0,546691022 | 6,573958778 | 0,001031225 | 0,001925672 |
| PAWR     | 0,365962223  | 4,506622542 | 0,001031318 | 0,001925672 |
| DCAF17   | 0,231783626  | 4,572661427 | 0,001032782 | 0,001927879 |
| INO80E   | 0,279738853  | 5,478730392 | 0,001036701 | 0,001934665 |
| INPP5F   | 0,441511921  | 4,928361156 | 0,001037649 | 0,001935904 |
| MYH9     | -0,428001321 | 10,86329206 | 0,00104054  | 0,001940766 |
| ZDHC6    | 0,277818496  | 5,724808002 | 0,001040916 | 0,001940938 |
| RFXANK   | 0,299379553  | 5,741422974 | 0,001052302 | 0,001961631 |
| DERL1    | 0,231763036  | 7,350172879 | 0,00106169  | 0,00197859  |
| TWISTNB  | 0,337432489  | 5,340978425 | 0,001064316 | 0,001982943 |
| ELAVL1   | 0,205882542  | 6,693999605 | 0,001065624 | 0,001984838 |
| ZNF330   | -0,288571802 | 5,499479714 | 0,00106764  | 0,001987754 |
| BCL7B    | -0,283921858 | 6,408707931 | 0,001067773 | 0,001987754 |
| TCERG1   | 0,282483612  | 5,701371886 | 0,001070838 | 0,001992917 |
| GCA      | -0,359675634 | 5,717830501 | 0,001074858 | 0,001999852 |
| TMEFF1   | 0,54361254   | 2,942823018 | 0,001082134 | 0,00201284  |
| XRN1     | -0,277729213 | 5,926227172 | 0,001084298 | 0,002016315 |
| ZNF503   | -0,490303756 | 5,204163744 | 0,001085157 | 0,002017362 |
| MRPL39   | 0,381517551  | 4,727300865 | 0,001086907 | 0,002020064 |
| TXNL1    | 0,397786541  | 6,520483181 | 0,001091059 | 0,002027228 |
| SHOC2    | -0,205809475 | 6,260949235 | 0,001103023 | 0,002048901 |
| SETD6    | 0,316925681  | 4,256061188 | 0,001116118 | 0,002072661 |
| MGAT4A   | -0,389688179 | 6,47344644  | 0,001119092 | 0,002077101 |
| TSR2     | -0,239564189 | 5,923459225 | 0,001119118 | 0,002077101 |
| TBC1D12  | -0,23643333  | 4,099749619 | 0,001128319 | 0,002093608 |
| PTPN18   | -0,263925206 | 6,60885273  | 0,001128814 | 0,002093957 |
| JHDM1D   | -0,336183618 | 5,660013799 | 0,001132144 | 0,002099562 |
| CLSTN1   | 0,372555921  | 8,263650001 | 0,001146309 | 0,002125254 |
| CSF1     | -0,576789723 | 5,951903091 | 0,001147645 | 0,002127151 |
| PRPF8    | -0,359023448 | 8,779182695 | 0,001148576 | 0,002128299 |
| BMS1     | 0,280940376  | 6,355947778 | 0,001152687 | 0,002135337 |
| CLIC6    | 0,994805529  | 7,473059925 | 0,001157739 | 0,002144113 |
| PRKRIP1  | 0,276098012  | 5,075895428 | 0,00116242  | 0,002152198 |
| COX7A2L  | 0,40651465   | 7,295924133 | 0,001165529 | 0,002157368 |
| IER3IP1  | 0,480434808  | 6,697209388 | 0,001179559 | 0,002182745 |
| THG1L    | 0,380119685  | 3,714114149 | 0,001181568 | 0,002185869 |
| PTK2     | 0,270562435  | 7,468818034 | 0,001193045 | 0,002206503 |
| ACACA    | -0,389990391 | 6,961997005 | 0,001195574 | 0,00221058  |
| MYEOV2   | 0,476783219  | 5,638051279 | 0,001201735 | 0,002221369 |
| ACAA2    | -0,460874701 | 6,685689172 | 0,001212451 | 0,002240569 |
| PPM1B    | -0,206750984 | 6,148678891 | 0,001212941 | 0,002240869 |
| ENSA     | 0,288087291  | 8,361693377 | 0,001215962 | 0,002245841 |
| HADHA    | -0,178358018 | 8,149407666 | 0,001219904 | 0,002252512 |
| C1orf54  | -0,508803385 | 3,582451379 | 0,001220865 | 0,002253676 |
| VMA21    | 0,278677546  | 6,321916895 | 0,001222697 | 0,002256447 |

|           |              |             |             |             |
|-----------|--------------|-------------|-------------|-------------|
| WDR6      | -0,294119256 | 7,275565366 | 0,001224744 | 0,002259613 |
| RB1       | -0,318266768 | 6,253347467 | 0,0012254   | 0,002260211 |
| PYGL      | 0,59623223   | 6,524889087 | 0,001225823 | 0,00226038  |
| CD7       | 0,699470371  | 4,088486259 | 0,00122772  | 0,002263267 |
| DEF6      | 0,355479045  | 4,930169508 | 0,001228819 | 0,00226468  |
| UGP2      | 0,276672017  | 7,582126826 | 0,001230683 | 0,002267502 |
| REL       | -0,471607683 | 3,382007236 | 0,001236516 | 0,002277635 |
| KIAA0556  | -0,347588155 | 5,22503336  | 0,001237086 | 0,002278069 |
| ZNF22     | -0,300830334 | 5,431382988 | 0,001238171 | 0,002279451 |
| PMM1      | -0,480246266 | 6,070193305 | 0,00123992  | 0,002282055 |
| RABGGTA   | -0,249019968 | 5,384820581 | 0,001241849 | 0,002284989 |
| CLIP1     | -0,322447122 | 7,01106106  | 0,001244865 | 0,002289921 |
| PMPCB     | 0,305596449  | 6,43473717  | 0,001260856 | 0,00231871  |
| NFX1      | -0,255455479 | 6,195900023 | 0,001261371 | 0,002319033 |
| CHMP4A    | 0,305010739  | 5,948818295 | 0,001262686 | 0,002320824 |
| DCAF8     | -0,252899453 | 7,087307608 | 0,001265094 | 0,002324622 |
| LOC152217 | 0,380801047  | 4,263277093 | 0,001267839 | 0,00232904  |
| CCDC117   | 0,262585575  | 5,780293905 | 0,001269996 | 0,002332374 |
| PLEKHG3   | 0,529061453  | 5,289804283 | 0,001294375 | 0,002376506 |
| TEAD4     | -0,487016072 | 4,271724516 | 0,001297373 | 0,00238137  |
| KLHL24    | -0,343908286 | 6,616725211 | 0,001301081 | 0,002387532 |
| NCF4      | -0,492047269 | 4,908102057 | 0,001308394 | 0,002400307 |
| ACOT13    | 0,399621801  | 5,915416259 | 0,001310748 | 0,002403978 |
| FANCM     | 0,431205946  | 3,002324933 | 0,00131678  | 0,002413991 |
| HERC2     | -0,408342822 | 6,33142793  | 0,001316915 | 0,002413991 |
| NUPR1     | -0,593378327 | 7,137377525 | 0,001318386 | 0,002416038 |
| UQCRFS1   | 0,41218413   | 6,819179932 | 0,001323032 | 0,002423899 |
| PSMD9     | 0,315916052  | 6,003565325 | 0,001332952 | 0,002441418 |
| SPSB2     | 0,52376767   | 4,822401517 | 0,001340807 | 0,002455146 |
| C7orf29   | 0,610982165  | 4,308749736 | 0,001346791 | 0,002465441 |
| OAF       | 0,538760917  | 4,80601185  | 0,001358259 | 0,002485768 |
| PLOD3     | 0,37646129   | 6,837329366 | 0,001359553 | 0,002487467 |
| NRBP2     | -0,427203578 | 5,427392541 | 0,001366138 | 0,002498845 |
| RNPEPL1   | -0,316023085 | 7,274809211 | 0,001367751 | 0,002501124 |
| FAM53C    | -0,264272744 | 5,821326104 | 0,001375126 | 0,002513936 |
| NAP1L4    | 0,222977658  | 7,29089225  | 0,001378857 | 0,002520082 |
| STK3      | 0,254392396  | 5,518344876 | 0,001382462 | 0,002525994 |
| FNTA      | 0,372720639  | 6,826686414 | 0,001397872 | 0,002553466 |
| OGFR      | -0,308466667 | 6,1776387   | 0,001399316 | 0,002555321 |
| GLRX5     | 0,265206308  | 5,68114638  | 0,001399637 | 0,002555321 |
| SAE1      | 0,270591274  | 6,910757959 | 0,001401137 | 0,002556747 |
| AP2A1     | 0,25071847   | 7,008235559 | 0,001401168 | 0,002556747 |
| BTN3A1    | -0,365649159 | 6,420800658 | 0,001418601 | 0,002587864 |
| DHX57     | 0,258020005  | 5,227469467 | 0,001420644 | 0,0025909   |
| MINA      | 0,249933596  | 5,766539342 | 0,001422524 | 0,002593634 |
| NDUFA11   | 0,463626973  | 6,605390684 | 0,001432683 | 0,002611459 |
| USP3      | 0,323175777  | 5,489495398 | 0,001434378 | 0,002613849 |
| MYL12A    | -0,32656749  | 9,206672303 | 0,001435373 | 0,002614963 |
| MLEC      | 0,385482714  | 8,48060106  | 0,001437181 | 0,002617558 |
| ARFIP2    | 0,285191328  | 6,267776335 | 0,001452317 | 0,00264442  |

|           |              |             |             |             |
|-----------|--------------|-------------|-------------|-------------|
| STAG1     | -0,309919813 | 5,363645783 | 0,001460961 | 0,002659449 |
| DBR1      | -0,197160008 | 4,781997441 | 0,00146795  | 0,002671458 |
| SMN2      | 0,355244214  | 6,143578435 | 0,00148041  | 0,002693413 |
| PATZ1     | 0,337582696  | 6,019334792 | 0,001491365 | 0,002712621 |
| DNAJB12   | -0,22758763  | 6,363078022 | 0,001495156 | 0,002718791 |
| AMIGO2    | 0,700654291  | 6,64007493  | 0,001497058 | 0,002721525 |
| FIP1L1    | 0,189055927  | 5,57331828  | 0,001519014 | 0,002760702 |
| SBNO1     | 0,416921324  | 5,009470461 | 0,001533321 | 0,002785963 |
| CCDC90B   | 0,394701766  | 5,45584564  | 0,001534687 | 0,002787701 |
| STAM2     | -0,251783694 | 6,080223154 | 0,001541423 | 0,002799191 |
| PPA2      | 0,353574196  | 6,493225735 | 0,001545194 | 0,002805293 |
| UXS1      | -0,309270227 | 6,833996907 | 0,001560569 | 0,002832451 |
| ITGB3BP   | 0,364277042  | 4,20485021  | 0,001568846 | 0,002846717 |
| TRPC4AP   | 0,177763296  | 7,393791388 | 0,001572315 | 0,002852253 |
| SF3A3     | 0,189103785  | 6,796378759 | 0,001586148 | 0,00287658  |
| PGLS      | 0,37288812   | 6,119036552 | 0,001591197 | 0,002884486 |
| ACTN4     | -0,338620211 | 9,560370523 | 0,001591353 | 0,002884486 |
| SIN3B     | -0,274983043 | 5,85279905  | 0,001593954 | 0,002888432 |
| MLL3      | -0,378508933 | 6,850361863 | 0,001595928 | 0,002891241 |
| H3F3B     | -0,259260437 | 9,796828749 | 0,001608696 | 0,002913598 |
| TNFRSF12A | 0,678712761  | 7,002308148 | 0,001628296 | 0,002948314 |
| PPA1      | 0,370141617  | 8,172300645 | 0,001640645 | 0,002969885 |
| APEH      | 0,250909156  | 7,020172467 | 0,00164263  | 0,002972689 |
| PDCD10    | 0,419036384  | 5,960646519 | 0,001643154 | 0,002972849 |
| RCAN3     | 0,314962024  | 3,650037616 | 0,001645908 | 0,002977042 |
| TTC8      | 0,265684983  | 4,559346636 | 0,001659847 | 0,003001458 |
| HYI       | -0,417536899 | 4,926596163 | 0,001666194 | 0,003012136 |
| DPYD      | -0,510280856 | 6,641690881 | 0,001668839 | 0,003016117 |
| SLC25A37  | 0,528176222  | 5,763379792 | 0,001678678 | 0,003033096 |
| CCDC90A   | 0,273781179  | 4,821080167 | 0,001679482 | 0,003033745 |
| EXOC8     | -0,264296178 | 5,164233259 | 0,001682144 | 0,003037748 |
| ACAP3     | 0,352152482  | 5,302190539 | 0,001682945 | 0,003038391 |
| HSD17B12  | -0,289731312 | 7,314124795 | 0,001697408 | 0,00306369  |
| NMI       | 0,369871799  | 5,520993435 | 0,001700437 | 0,003068346 |
| C7orf60   | 0,460459674  | 4,699905783 | 0,001716072 | 0,003095618 |
| TOP2B     | -0,288800379 | 7,417382651 | 0,001716459 | 0,003095618 |
| DPH5      | 0,342204892  | 4,710638773 | 0,001720158 | 0,00310147  |
| SNRPD3    | 0,255734233  | 6,62598823  | 0,001738765 | 0,00313419  |
| ZZZ3      | 0,2961339    | 5,493827338 | 0,001755307 | 0,003163172 |
| EDEM3     | 0,349753358  | 6,499539283 | 0,001760021 | 0,003170827 |
| DNAJA4    | -0,525180601 | 5,628508848 | 0,001762781 | 0,003174961 |
| ZNF337    | -0,342882671 | 4,494441935 | 0,001764573 | 0,00317735  |
| ABCF1     | 0,305235787  | 7,017632011 | 0,001776167 | 0,003197381 |
| ZMIZ2     | 0,379431772  | 7,420974758 | 0,001780186 | 0,003203771 |
| KIF3B     | -0,295408636 | 6,651203505 | 0,001781358 | 0,003205034 |
| IKBIP     | 0,350210991  | 5,123771658 | 0,001800979 | 0,003238855 |
| RAVER1    | 0,307760388  | 6,447096992 | 0,001801105 | 0,003238855 |
| HMHA1     | -0,365126266 | 6,438167282 | 0,001803457 | 0,003242228 |
| LOC642852 | 0,423714633  | 3,867328453 | 0,001804032 | 0,003242407 |
| PIK3AP1   | -0,498583554 | 5,885667441 | 0,001814109 | 0,00325966  |

|           |              |             |             |             |
|-----------|--------------|-------------|-------------|-------------|
| WDR18     | 0,368356858  | 5,194327533 | 0,001831657 | 0,003290324 |
| RNF25     | 0,267813764  | 4,812134172 | 0,001840306 | 0,00330499  |
| RNPEP     | 0,290582249  | 7,243216516 | 0,001857486 | 0,003334965 |
| NNT       | 0,424259913  | 6,718729285 | 0,001863953 | 0,003345695 |
| INTS1     | 0,404560807  | 7,458862299 | 0,001877745 | 0,003369563 |
| PARP11    | -0,343799603 | 4,025727557 | 0,001887928 | 0,003386947 |
| SORL1     | 0,671577806  | 7,390470617 | 0,001891489 | 0,003392441 |
| PDE4D     | -0,61813111  | 6,353063287 | 0,001899903 | 0,003406637 |
| IWS1      | 0,227564462  | 6,296522822 | 0,001901181 | 0,003408032 |
| BET1L     | 0,26808449   | 6,951023142 | 0,001906561 | 0,003416777 |
| FBXO11    | -0,224047932 | 6,432284358 | 0,00191567  | 0,003432201 |
| FLOT1     | 0,333053896  | 8,367420529 | 0,001918107 | 0,003435664 |
| UBE2H     | 0,287789378  | 6,66677829  | 0,001920338 | 0,003438756 |
| AGAP1     | 0,400335263  | 5,042689789 | 0,001922551 | 0,003441815 |
| DCTD      | 0,234930275  | 6,779339183 | 0,001926753 | 0,003448433 |
| TRIM24    | 0,37304135   | 5,851805655 | 0,001943128 | 0,003476827 |
| SAMD1     | 0,28796994   | 4,348453128 | 0,001945494 | 0,003480147 |
| ZADH2     | -0,342328667 | 5,502896679 | 0,001948183 | 0,003484045 |
| NCL       | 0,296073772  | 9,511720928 | 0,001953558 | 0,00349274  |
| NR1D2     | -0,348169061 | 6,162129628 | 0,001971903 | 0,003524616 |
| LGALS1    | 0,702947391  | 8,883101754 | 0,00198463  | 0,003546435 |
| DDT       | 0,385987056  | 5,980509478 | 0,002030401 | 0,003627275 |
| PHF8      | 0,408624198  | 5,901336871 | 0,002031921 | 0,003629038 |
| NDUFA10   | 0,202423746  | 6,623674376 | 0,002039115 | 0,003640933 |
| DCTN2     | 0,26171664   | 7,420351241 | 0,002053091 | 0,003664929 |
| DCUN1D1   | 0,302909623  | 5,511051058 | 0,002056724 | 0,003670454 |
| TRAPPC2L  | 0,42186086   | 5,590509926 | 0,002059448 | 0,003674353 |
| FAR1      | -0,25932462  | 6,306142271 | 0,002064197 | 0,003681862 |
| PELO      | 0,317881878  | 5,562183472 | 0,002081896 | 0,003712461 |
| HNRNPA1   | 0,230628817  | 10,18360482 | 0,002100874 | 0,003745322 |
| RFK       | 0,443348486  | 5,901002878 | 0,002107387 | 0,003755952 |
| RNASEK    | -0,266376874 | 5,630386807 | 0,002128477 | 0,003792549 |
| RPS15     | 0,386433914  | 8,89884735  | 0,002133791 | 0,003801024 |
| WTAP      | -0,250124907 | 6,99251217  | 0,002146766 | 0,003823138 |
| EIF1      | -0,26040732  | 9,75267456  | 0,002153618 | 0,00383434  |
| DNMBP     | 0,388482713  | 5,762803438 | 0,002170864 | 0,003864035 |
| TMTC3     | 0,299279798  | 5,549241155 | 0,002181584 | 0,003882103 |
| MAF1      | 0,249934582  | 7,464104361 | 0,002194212 | 0,003903556 |
| RPL32     | 0,431215142  | 10,13147307 | 0,002205244 | 0,00392216  |
| RASA4     | -0,364000325 | 6,113630617 | 0,002211878 | 0,003932933 |
| RAB22A    | 0,234056834  | 6,501854061 | 0,002213576 | 0,003934925 |
| FBXO46    | 0,31450801   | 4,658803337 | 0,002217386 | 0,003940672 |
| EAF1      | -0,219500533 | 5,947522643 | 0,002221572 | 0,003947082 |
| FJX1      | 0,700975287  | 2,736901396 | 0,002226445 | 0,00395471  |
| SHPK      | 0,329328226  | 4,84257507  | 0,00224368  | 0,003984285 |
| ZNF274    | -0,272002843 | 5,059838656 | 0,002256854 | 0,004006635 |
| LPCAT4    | 0,587635334  | 5,573758805 | 0,002262846 | 0,004016227 |
| TRIM44    | -0,339043721 | 6,417496192 | 0,002275858 | 0,004037276 |
| CD74      | -0,53667791  | 12,69606995 | 0,002275889 | 0,004037276 |
| LOC285359 | 0,40773192   | 1,805874164 | 0,002287303 | 0,004056469 |

|           |              |             |             |             |
|-----------|--------------|-------------|-------------|-------------|
| CDC40     | -0,216094713 | 5,350988994 | 0,002306292 | 0,00408908  |
| NSMCE1    | 0,302751145  | 5,967353039 | 0,002325204 | 0,004121541 |
| BCLAF1    | -0,230123435 | 7,508054142 | 0,002327607 | 0,004124728 |
| ATG12     | 0,271649287  | 5,334177007 | 0,002329452 | 0,004126925 |
| CCDC159   | -0,292906404 | 3,99868676  | 0,002331017 | 0,004128625 |
| HELB      | 0,506604001  | 1,517432225 | 0,002341316 | 0,00414579  |
| ATP8B1    | 0,478877562  | 6,562601469 | 0,002357489 | 0,004173343 |
| ANXA5     | -0,305242546 | 9,255467794 | 0,002367113 | 0,004189292 |
| LAMA5     | -0,499183771 | 7,633378045 | 0,00237652  | 0,004204849 |
| HINT1     | 0,434179844  | 8,015313785 | 0,002398214 | 0,004242133 |
| RAI14     | 0,431438583  | 7,513640779 | 0,00240892  | 0,004259965 |
| C20orf111 | 0,378648806  | 5,786326221 | 0,002421191 | 0,004280556 |
| DYNLT3    | -0,272459452 | 5,730430926 | 0,002433217 | 0,004300702 |
| FTL       | -0,484779133 | 12,88988025 | 0,002436683 | 0,004305712 |
| ALMS1     | -0,403593481 | 5,103627735 | 0,002446772 | 0,004320942 |
| MRPL40    | 0,345393743  | 5,37162882  | 0,002447032 | 0,004320942 |
| DHX38     | -0,258794907 | 6,330022389 | 0,002447203 | 0,004320942 |
| BRI3      | -0,372272458 | 7,620185504 | 0,002449337 | 0,00432359  |
| PCM1      | -0,396239021 | 7,417332379 | 0,002451018 | 0,004325438 |
| C10orf11  | -0,419330759 | 3,527468567 | 0,002453879 | 0,004329367 |
| UBL5      | 0,402100398  | 7,28526111  | 0,00248155  | 0,004377054 |
| ZNF445    | -0,317542115 | 5,189277909 | 0,002495671 | 0,004400823 |
| GOLGA8B   | -0,590355819 | 5,863902761 | 0,002505516 | 0,004416895 |
| NGFRAP1   | -0,399547144 | 6,758413902 | 0,002506081 | 0,004416895 |
| TMC6      | 0,358306704  | 7,030858294 | 0,002513073 | 0,004428074 |
| EIF4G3    | 0,311241792  | 6,523397808 | 0,002535356 | 0,004466182 |
| TMED10    | 0,238742679  | 9,086678469 | 0,002539219 | 0,004471832 |
| RPS27     | 0,382448035  | 10,29099476 | 0,002549131 | 0,004488129 |
| MUL1      | -0,220122193 | 5,887680354 | 0,002551988 | 0,004491999 |
| ZNF805    | -0,254503598 | 4,503296063 | 0,002557998 | 0,004501416 |
| CES2      | -0,345114755 | 6,268892379 | 0,002559975 | 0,004503222 |
| PSMB1     | 0,338059092  | 7,641044876 | 0,002560345 | 0,004503222 |
| ATP6V1C1  | 0,263617772  | 6,757529352 | 0,002567631 | 0,004514392 |
| H2AFY     | 0,22995081   | 8,058830336 | 0,00256802  | 0,004514392 |
| MAMDC4    | 0,713119443  | 2,567882463 | 0,002570205 | 0,004517068 |
| TBC1D25   | -0,188918126 | 4,932001087 | 0,002580712 | 0,004534366 |
| INTS2     | 0,25398928   | 4,633466004 | 0,002581558 | 0,004534684 |
| DCTN6     | -0,282440074 | 5,259770226 | 0,002594436 | 0,004556131 |
| STRN3     | 0,315626533  | 5,785277338 | 0,002596391 | 0,004558391 |
| PLIN2     | -0,519057161 | 7,162445936 | 0,002602725 | 0,004568335 |
| INO80C    | -0,337563272 | 4,305427939 | 0,002625256 | 0,004606697 |
| ATP13A3   | 0,369629624  | 7,313112144 | 0,002635334 | 0,004623191 |
| PGD       | 0,572844279  | 8,417955923 | 0,002653619 | 0,004654071 |
| BTBD7     | -0,277741264 | 5,866426972 | 0,002657323 | 0,00465832  |
| IQGAP2    | -0,558546162 | 5,303165319 | 0,002657408 | 0,00465832  |
| DNAJC11   | 0,224106539  | 5,804287842 | 0,0026599   | 0,00466149  |
| HNRNP3    | -0,223305682 | 7,134427206 | 0,002661399 | 0,00466292  |
| NPC1      | -0,384039461 | 6,821029487 | 0,00269999  | 0,004729318 |
| FLJ45340  | -0,392695148 | 6,168132542 | 0,002703091 | 0,004733533 |
| TNKS1BP1  | -0,36784439  | 8,012628231 | 0,002711081 | 0,004746306 |



|          |              |             |             |             |
|----------|--------------|-------------|-------------|-------------|
| C5orf15  | 0,305863245  | 7,17683149  | 0,002754746 | 0,004821513 |
| HSPA1A   | 0,554259077  | 8,65244657  | 0,002768918 | 0,004845073 |
| ATP5I    | 0,414714724  | 6,612739012 | 0,002771353 | 0,00484809  |
| ZNF143   | 0,197621258  | 4,583905506 | 0,002772678 | 0,004849164 |
| CLIP3    | 0,605471019  | 4,57806483  | 0,002815913 | 0,004923515 |
| FXR1     | 0,288724478  | 6,989910645 | 0,002819907 | 0,004929235 |
| HECTD2   | -0,283019323 | 3,731846685 | 0,002820672 | 0,004929309 |
| SIVA1    | 0,382200619  | 6,38299889  | 0,002826358 | 0,004937979 |
| RPL7     | 0,356784401  | 10,53746491 | 0,002854713 | 0,004986241 |
| COMMD10  | 0,404210754  | 5,251447277 | 0,002859787 | 0,004993825 |
| DEDD     | 0,225620173  | 5,895536301 | 0,002885981 | 0,005038276 |
| KHNYN    | -0,23163047  | 6,771702954 | 0,002896752 | 0,005055785 |
| TYW1     | 0,248213901  | 4,956140308 | 0,002909557 | 0,005076834 |
| LZTS2    | 0,268854949  | 6,499431706 | 0,002922445 | 0,005096869 |
| IGF2BP2  | 0,777050624  | 5,173420187 | 0,002922534 | 0,005096869 |
| MDN1     | -0,419030602 | 5,66747918  | 0,002939498 | 0,005125144 |
| LANCL1   | -0,301657567 | 6,261840139 | 0,002944652 | 0,005132818 |
| RAB6A    | -0,211417167 | 7,868533537 | 0,002947758 | 0,005136918 |
| TSPO     | -0,399352314 | 7,444990749 | 0,002949668 | 0,005138933 |
| PDGFC    | 0,435266105  | 5,741808246 | 0,002964504 | 0,005163045 |
| FZR1     | 0,229155048  | 5,749241757 | 0,002965022 | 0,005163045 |
| LRIG2    | -0,275792138 | 3,579040725 | 0,002981458 | 0,005190341 |
| LMTK2    | -0,445556348 | 5,20167327  | 0,002985007 | 0,005195192 |
| LRWD1    | 0,321677433  | 4,773452363 | 0,002986168 | 0,005195887 |
| PHF5A    | 0,366752045  | 5,405527573 | 0,003007425 | 0,005231539 |
| EIF3D    | 0,246747372  | 8,034604633 | 0,003030915 | 0,005271057 |
| ZNF33A   | -0,296710085 | 5,734444068 | 0,003036769 | 0,00527989  |
| ATR      | 0,27243558   | 5,295450256 | 0,003046578 | 0,005295593 |
| KLF3     | -0,277023146 | 6,874598758 | 0,00307068  | 0,005336129 |
| MRE11A   | 0,275128417  | 4,781147449 | 0,003080557 | 0,005351929 |
| AKT1S1   | 0,277932467  | 5,866052923 | 0,00308164  | 0,005352446 |
| CDC25B   | 0,467141376  | 7,097064431 | 0,003082509 | 0,005352592 |
| TRERF1   | 0,419990169  | 4,38027395  | 0,003086863 | 0,005358788 |
| IGFBP7   | -0,415145157 | 8,870978968 | 0,003107083 | 0,005392518 |
| XPNPEP1  | 0,242452235  | 6,104588945 | 0,003108351 | 0,005393345 |
| KRR1     | 0,241689111  | 5,719100358 | 0,0031112   | 0,005396915 |
| GABPB1   | 0,230697466  | 4,950934403 | 0,003142701 | 0,005450173 |
| ALG14    | 0,34111985   | 3,872963117 | 0,003147645 | 0,005456667 |
| TMEM45A  | 0,411685721  | 7,113728917 | 0,003148046 | 0,005456667 |
| C12orf10 | 0,303748241  | 5,560064898 | 0,003157157 | 0,005471068 |
| RGS2     | -0,65917363  | 6,756439138 | 0,003158163 | 0,005471421 |
| NDUFV3   | 0,251864913  | 5,573147205 | 0,003165337 | 0,005481316 |
| ITGA7    | -0,472294966 | 3,65106342  | 0,003165482 | 0,005481316 |
| PDCD7    | -0,176525144 | 4,854874658 | 0,003185589 | 0,005514733 |
| LRP11    | 0,3310977    | 6,462823075 | 0,003190938 | 0,005522591 |
| TMEM126A | 0,356737816  | 4,536969081 | 0,003193975 | 0,005526445 |
| TIPARP   | -0,576370237 | 7,084365074 | 0,003213217 | 0,005558328 |
| TMUB2    | 0,215618505  | 6,015478353 | 0,003235025 | 0,005594632 |
| PRKD3    | -0,293299724 | 6,28494     | 0,003237206 | 0,005596984 |
| SLC17A5  | -0,284456594 | 5,726792656 | 0,00323837  | 0,005597577 |

|          |              |             |             |             |
|----------|--------------|-------------|-------------|-------------|
| ZCRB1    | 0,263779433  | 6,088695877 | 0,003248409 | 0,005613508 |
| SF1      | -0,192705574 | 8,063801957 | 0,003288739 | 0,005681762 |
| KCTD6    | 0,30996461   | 3,322177651 | 0,003291433 | 0,005684974 |
| VPS4B    | -0,229424842 | 6,511394282 | 0,003308133 | 0,005712373 |
| SSNA1    | 0,334034058  | 6,172778707 | 0,003316865 | 0,005726    |
| EIF2C2   | 0,388358668  | 4,173060144 | 0,0033225   | 0,005734276 |
| CCDC109B | 0,456306402  | 4,67440131  | 0,003334127 | 0,005752888 |
| RABGEF1  | -0,183573503 | 5,837744778 | 0,003358176 | 0,005792917 |
| KIAA0430 | -0,283853805 | 6,798959393 | 0,003379168 | 0,005827655 |
| IGSF8    | 0,416333945  | 6,387454876 | 0,003384582 | 0,005835516 |
| ST8SIA4  | 0,484261113  | 5,782510484 | 0,003395611 | 0,005853051 |
| PTOV1    | 0,251479405  | 6,884803663 | 0,003398419 | 0,005856411 |
| DUSP5    | 0,582286741  | 5,976886993 | 0,003412073 | 0,005878455 |
| PI4KAP2  | -0,299383972 | 4,366618979 | 0,003414094 | 0,005880451 |
| SIRT1    | -0,245307653 | 5,36817142  | 0,003421795 | 0,005892227 |
| SNHG11   | 0,311473373  | 3,336563406 | 0,003433921 | 0,005911614 |
| C12orf65 | 0,2635272    | 5,042673231 | 0,003467705 | 0,005968268 |
| EIF2S1   | 0,262676828  | 6,799176253 | 0,003482375 | 0,005992005 |
| TBC1D22B | 0,219299898  | 5,061129924 | 0,003490294 | 0,006004117 |
| MAGED2   | 0,322292499  | 8,10849326  | 0,003521137 | 0,006055645 |
| ZDHHC7   | -0,30670968  | 6,934949851 | 0,003551996 | 0,006107177 |
| GTF2H2   | 0,29889469   | 4,19112407  | 0,00355741  | 0,006114943 |
| TMCO7    | -0,232242761 | 4,411438355 | 0,003604064 | 0,006193577 |
| RPL4     | 0,294593174  | 10,8365226  | 0,003626448 | 0,006230474 |
| LCP2     | -0,436067555 | 5,957042296 | 0,003631876 | 0,006238227 |
| NDRG1    | 0,53751438   | 9,641517137 | 0,003635751 | 0,00624331  |
| DPM1     | 0,320130296  | 5,570767147 | 0,003636922 | 0,006243749 |
| HEATR3   | 0,25711608   | 4,618293572 | 0,003640862 | 0,006248939 |
| ATXN2    | -0,259253736 | 5,933848803 | 0,003665582 | 0,006289784 |
| ALKBH5   | -0,213042444 | 7,023984971 | 0,003666961 | 0,006290568 |
| MXII     | -0,30282285  | 5,911282398 | 0,00370524  | 0,006354063 |
| SLC38A10 | 0,281598858  | 7,791546195 | 0,003705838 | 0,006354063 |
| VPS13B   | -0,308611977 | 5,627124879 | 0,003718396 | 0,006373992 |
| HPS1     | -0,220318654 | 6,539901349 | 0,003719365 | 0,006374052 |
| COG1     | 0,265306661  | 5,95506661  | 0,003732816 | 0,006395496 |
| JRKL     | 0,299949526  | 4,47580488  | 0,003752169 | 0,006427038 |
| TGS1     | 0,235500062  | 5,320678284 | 0,003754163 | 0,006428839 |
| CDKAL1   | 0,236016889  | 5,00659159  | 0,00378277  | 0,006476201 |
| TCTN2    | -0,32345721  | 4,977810328 | 0,003804981 | 0,006512592 |
| PHGDH    | 0,793408513  | 5,410304291 | 0,003826141 | 0,006547165 |
| DCTN4    | -0,224152149 | 6,75953049  | 0,003827142 | 0,006547236 |
| FASTKD2  | 0,188334061  | 6,01738391  | 0,003835399 | 0,006559715 |
| CNOT4    | -0,17904643  | 4,834718993 | 0,003836562 | 0,006560059 |
| NUCB2    | 0,334064124  | 6,827079949 | 0,003857553 | 0,006594298 |
| GRB10    | 0,480028269  | 6,137261862 | 0,003859309 | 0,006595647 |
| COX15    | 0,215794555  | 6,091865696 | 0,003877997 | 0,006625923 |
| PACS1    | 0,287855859  | 7,281724718 | 0,003880489 | 0,00662852  |
| IFITM2   | -0,366890368 | 8,008048001 | 0,00390584  | 0,006670154 |
| DVL1     | 0,346812108  | 6,595846748 | 0,003912379 | 0,006679648 |
| ARL2BP   | -0,231949339 | 6,799035142 | 0,003924053 | 0,006697901 |

|          |              |             |             |             |
|----------|--------------|-------------|-------------|-------------|
| LIX1L    | -0,351444897 | 5,519640723 | 0,003930578 | 0,00670736  |
| RAB13    | 0,20919643   | 7,22672227  | 0,003949107 | 0,006737292 |
| DSEL     | -0,472041752 | 4,572129004 | 0,003967104 | 0,006766304 |
| TUBGCP6  | -0,357920484 | 5,650396617 | 0,003980677 | 0,006787757 |
| ZNF526   | 0,211392814  | 4,491495172 | 0,003992957 | 0,006806993 |
| COX17    | 0,336055338  | 5,5679494   | 0,003996647 | 0,006811581 |
| RNF40    | 0,246926881  | 7,217060874 | 0,004009382 | 0,006829977 |
| BTN2A1   | -0,241753129 | 5,391103079 | 0,004009444 | 0,006829977 |
| CRTC2    | 0,230847934  | 6,328963177 | 0,004036391 | 0,006874163 |
| SEPT6    | 0,389295938  | 6,010065962 | 0,004041539 | 0,006881212 |
| SLC25A6  | 0,308568936  | 9,402923392 | 0,004055093 | 0,006902566 |
| S100A4   | -0,693351525 | 8,624822246 | 0,004077836 | 0,006939547 |
| TRIP6    | 0,430680573  | 6,571424598 | 0,004085301 | 0,006950515 |
| CDC37    | -0,206648211 | 7,533144764 | 0,004113228 | 0,006996284 |
| ALKBH1   | 0,224482025  | 3,95699323  | 0,004127826 | 0,007019363 |
| TBCD     | 0,301254547  | 7,101497493 | 0,004133666 | 0,007027541 |
| SLC6A6   | -0,332120479 | 7,048060492 | 0,004163084 | 0,00707579  |
| METRNL   | -0,381884654 | 5,587179015 | 0,004178706 | 0,007100553 |
| GRB2     | -0,20033454  | 8,055490304 | 0,004179736 | 0,007100553 |
| AKR7A2   | 0,291932891  | 6,061459535 | 0,004187431 | 0,007111853 |
| C6orf57  | 0,481188249  | 3,269600538 | 0,004190038 | 0,00711451  |
| EIF4G1   | 0,325338856  | 9,210082912 | 0,004194868 | 0,007120937 |
| SLC19A2  | -0,447161577 | 5,604276788 | 0,004203458 | 0,007133744 |
| FUCA2    | 0,304958621  | 6,821588836 | 0,004220395 | 0,007159522 |
| PLEKHM1  | -0,304145145 | 6,0671447   | 0,004220747 | 0,007159522 |
| CCRN4L   | -0,313251802 | 3,419913967 | 0,004222547 | 0,007160793 |
| USP33    | -0,205278738 | 6,50878373  | 0,004257242 | 0,007217835 |
| C17orf85 | -0,286750633 | 5,112043634 | 0,004262218 | 0,007224475 |
| PPP4R2   | 0,253754536  | 5,129402653 | 0,004314565 | 0,007311386 |
| ZBTB8OS  | 0,302151311  | 4,320158289 | 0,004375099 | 0,007412125 |
| ITGA9    | -0,561791921 | 4,657411315 | 0,004376222 | 0,007412185 |
| SP1      | -0,215735543 | 7,258337812 | 0,004404535 | 0,007458288 |
| RPS19BP1 | 0,313525268  | 6,171569887 | 0,004426029 | 0,007492823 |
| ZMYM4    | 0,190865835  | 6,439316135 | 0,004445029 | 0,007522146 |
| RNF141   | -0,265473596 | 6,558391325 | 0,004445556 | 0,007522146 |
| ELL      | -0,245746921 | 4,943847564 | 0,004514711 | 0,007636395 |
| MLL      | -0,355124253 | 6,651202363 | 0,004515317 | 0,007636395 |
| BSG      | 0,302505594  | 9,56661581  | 0,004517799 | 0,007638698 |
| DHX16    | 0,224861826  | 5,999447356 | 0,004541374 | 0,007675863 |
| FZD8     | -0,552131516 | 4,460091267 | 0,004542031 | 0,007675863 |
| C22orf28 | 0,205745708  | 6,852073579 | 0,004592106 | 0,007758565 |
| HNRNPK   | 0,131005719  | 9,582541212 | 0,004597943 | 0,007766504 |
| SUPT16H  | 0,275330346  | 7,416608857 | 0,004606776 | 0,007779496 |
| SLMAP    | -0,220715951 | 6,062889548 | 0,004612624 | 0,007787442 |
| POLH     | -0,229806505 | 5,462094127 | 0,004620047 | 0,007798045 |
| DNM1L    | 0,338236865  | 6,535440043 | 0,004634507 | 0,007820515 |
| KIF1B    | -0,293272676 | 6,691784415 | 0,004636912 | 0,007822637 |
| RAC1     | 0,251960753  | 9,233569943 | 0,004640704 | 0,007827098 |
| PSAP     | -0,274524054 | 11,64000489 | 0,004670107 | 0,007874743 |
| STK38    | 0,252404878  | 6,48780899  | 0,004678755 | 0,007887374 |

|           |              |             |             |             |
|-----------|--------------|-------------|-------------|-------------|
| FGL2      | -0,531103912 | 6,336423263 | 0,00469729  | 0,007916663 |
| LMBR1     | 0,238459686  | 6,062892752 | 0,004734754 | 0,007977832 |
| RASA3     | -0,397108169 | 5,025892728 | 0,004757169 | 0,008013621 |
| MICB      | 0,435700718  | 4,110021913 | 0,004760407 | 0,008017094 |
| RBM22     | -0,170157134 | 6,05382236  | 0,004762961 | 0,008019415 |
| HNRNPR    | 0,189268791  | 7,405567278 | 0,004785405 | 0,008055214 |
| GTF2H3    | 0,287348932  | 4,301010551 | 0,004818538 | 0,008108986 |
| S100PBP   | 0,226477943  | 5,122793047 | 0,004833195 | 0,008131646 |
| ACAT2     | -0,346789954 | 5,361161172 | 0,004851099 | 0,008159755 |
| MX1       | 0,570023331  | 7,510370101 | 0,004877191 | 0,008200588 |
| SLC3A2    | 0,338116999  | 7,82382672  | 0,00487778  | 0,008200588 |
| RAB3GAP2  | 0,187472213  | 6,128721032 | 0,004888493 | 0,008216573 |
| LOC727896 | -0,28946377  | 1,589835693 | 0,004892319 | 0,008220977 |
| PBX3      | -0,316927568 | 5,308675454 | 0,004903954 | 0,008238498 |
| COPS3     | 0,269485941  | 6,19847772  | 0,004910899 | 0,008248132 |
| MAP2K4    | -0,197316923 | 5,606226142 | 0,004950358 | 0,008312359 |
| LENG8     | -0,42400485  | 7,187917737 | 0,004962329 | 0,008327746 |
| YWHAB     | -0,166270668 | 8,916048944 | 0,004962689 | 0,008327746 |
| TCTN1     | -0,310722488 | 5,485921715 | 0,004964261 | 0,008327746 |
| CMTM3     | 0,421448973  | 6,317902565 | 0,004964407 | 0,008327746 |
| DCUN1D3   | -0,358030907 | 4,45221772  | 0,004970714 | 0,008336277 |
| PASK      | 0,384042958  | 4,18960117  | 0,004986678 | 0,008360992 |
| STX4      | 0,251300131  | 5,871766378 | 0,004988143 | 0,008361393 |
| BAX       | 0,237052267  | 6,045750853 | 0,005057899 | 0,008476239 |
| HAS2      | -0,726406257 | 3,610493741 | 0,005085518 | 0,00852043  |
| PRKCSH    | 0,26170033   | 8,399029297 | 0,005086987 | 0,008520479 |
| SHKBP1    | 0,259917251  | 6,734267645 | 0,005088047 | 0,008520479 |
| GHITM     | 0,26765214   | 8,21844803  | 0,005091623 | 0,008522804 |
| PDE12     | -0,173734656 | 5,253402512 | 0,005091935 | 0,008522804 |
| PPIL2     | 0,236889876  | 6,037688283 | 0,005093367 | 0,008523109 |
| SPNS1     | -0,215054723 | 6,28051391  | 0,005100034 | 0,008532171 |
| FAM104B   | -0,323817405 | 4,031578407 | 0,005111397 | 0,008549084 |
| PARP8     | 0,321648422  | 5,283284192 | 0,005120765 | 0,008562652 |
| ACPL2     | 0,334968153  | 4,133033531 | 0,005123974 | 0,008565918 |
| ERLEC1    | 0,338245678  | 7,572452366 | 0,00512924  | 0,008572619 |
| ME1       | 0,520044763  | 5,728172394 | 0,005135165 | 0,00858042  |
| C9orf89   | 0,374572782  | 4,500389412 | 0,005171695 | 0,008639341 |
| NUMA1     | -0,322221923 | 8,657123485 | 0,005174975 | 0,008642702 |
| ARHGAP1   | 0,247816391  | 7,63762216  | 0,005197569 | 0,008678312 |
| PARL      | 0,26141517   | 6,068957169 | 0,005204971 | 0,008688543 |
| RHOBTB1   | -0,416251741 | 5,00612531  | 0,005237541 | 0,008740771 |
| WBP1      | 0,285143679  | 6,33837063  | 0,005257235 | 0,008771083 |
| PSMB9     | 0,562646192  | 6,794401944 | 0,005259246 | 0,008771083 |
| JAG1      | -0,490650233 | 6,389303279 | 0,005259563 | 0,008771083 |
| LIMS1     | -0,301292206 | 5,099320529 | 0,005294634 | 0,00882741  |
| YAP1      | -0,306854711 | 7,78272638  | 0,005320427 | 0,008868245 |
| AFF4      | -0,275198294 | 7,322712537 | 0,005353633 | 0,008921414 |
| RAB40C    | 0,334275858  | 5,962831161 | 0,005372596 | 0,008950826 |
| QTRT1     | 0,296981358  | 4,745377386 | 0,005390875 | 0,008979086 |
| ASNA1     | 0,292820351  | 6,623098785 | 0,005409897 | 0,009008569 |

|           |              |             |             |             |
|-----------|--------------|-------------|-------------|-------------|
| LOC550643 | 0,283472381  | 5,312659618 | 0,005412977 | 0,009011497 |
| USP35     | 0,31263043   | 3,386869844 | 0,005425917 | 0,009030834 |
| ERO1LB    | 0,583014344  | 4,944225763 | 0,00544125  | 0,009054145 |
| CCDC85B   | -0,431936766 | 4,508522454 | 0,005444896 | 0,009058002 |
| TMX1      | 0,271943961  | 6,583028825 | 0,005482637 | 0,009118562 |
| BBS7      | -0,197653296 | 4,07215609  | 0,005504934 | 0,009153413 |
| ABCF3     | 0,213389722  | 6,153969144 | 0,005508298 | 0,009156774 |
| IFIT5     | -0,325086126 | 5,796244143 | 0,005548404 | 0,009221196 |
| UBE2B     | -0,258170423 | 6,617510866 | 0,005568793 | 0,009251799 |
| LOC441454 | 0,282665928  | 1,876478921 | 0,005569531 | 0,009251799 |
| TRAM1     | 0,368126994  | 9,567581746 | 0,005603587 | 0,009306103 |
| GULP1     | 0,554529723  | 5,648913008 | 0,005605668 | 0,009307292 |
| IKBKAP    | -0,2186944   | 5,773461032 | 0,005683305 | 0,009433898 |
| ZMYM6     | -0,180448696 | 4,9539187   | 0,005702003 | 0,009462632 |
| SLC25A16  | 0,364719488  | 4,608712404 | 0,005703434 | 0,009462705 |
| ATF7IP    | 0,342443079  | 5,920425257 | 0,005708762 | 0,009469241 |
| ATP5L     | 0,361329136  | 7,809139483 | 0,005710428 | 0,0094697   |
| RAPGEF6   | -0,38943253  | 4,424956289 | 0,005730065 | 0,009499954 |
| DEXI      | -0,210336931 | 5,403689268 | 0,005742825 | 0,009518795 |
| CAST      | -0,266269606 | 8,618059686 | 0,005807104 | 0,009622999 |
| LYN       | 0,365470583  | 7,347879368 | 0,005847818 | 0,009688112 |
| ITPRIPL2  | -0,253755432 | 7,022921758 | 0,005878166 | 0,009736025 |
| RNFT1     | 0,438307616  | 4,957346962 | 0,005884998 | 0,009744973 |
| LYPLAL1   | 0,337078089  | 4,978116302 | 0,005900145 | 0,009767684 |
| F3        | -0,597230963 | 7,549339208 | 0,005906566 | 0,00977594  |
| SNX4      | -0,198435187 | 5,996258562 | 0,005911358 | 0,009779784 |
| TMX2      | 0,223979724  | 7,075350209 | 0,005911757 | 0,009779784 |
| RBM12     | 0,162808597  | 6,897999776 | 0,005927825 | 0,009803988 |
| ADNP      | 0,263310337  | 7,028281042 | 0,00595032  | 0,009838805 |
| UBR2      | -0,213131755 | 5,845200695 | 0,005987074 | 0,009897177 |
| KDM4B     | -0,258292363 | 5,618297104 | 0,005988799 | 0,00989763  |
| COL16A1   | 0,464093978  | 5,778519903 | 0,006007287 | 0,009925779 |
| CSTB      | 0,461698852  | 8,74831994  | 0,006015849 | 0,009937517 |
| TMEM126B  | 0,403416137  | 5,673567591 | 0,006031618 | 0,009961153 |
| C7orf31   | -0,325161563 | 2,994889049 | 0,006059835 | 0,01000533  |
| PDCD2     | 0,231180883  | 5,520106456 | 0,006072247 | 0,010023398 |
| CLK4      | -0,355533166 | 4,366768845 | 0,006085719 | 0,010043204 |
| KIF5B     | -0,220717498 | 8,218048482 | 0,006097019 | 0,010059418 |
| CYTIP     | -0,420902595 | 5,023476438 | 0,006108669 | 0,010076201 |
| GBAS      | 0,368656339  | 7,054686325 | 0,006113043 | 0,010080976 |
| ZNF607    | 0,358824614  | 3,363934244 | 0,006119373 | 0,010088976 |
| SNX21     | 0,481897749  | 5,672129891 | 0,006143987 | 0,010127109 |
| CDKN2D    | -0,331973704 | 3,498369424 | 0,006155165 | 0,010142622 |
| TCEA3     | 0,529507053  | 6,375335218 | 0,006156374 | 0,010142622 |
| CLK1      | -0,332905076 | 6,289428923 | 0,006168082 | 0,010159457 |
| NRAS      | 0,294947563  | 6,920220117 | 0,006209524 | 0,010225246 |
| SLC9A1    | -0,365190449 | 6,684488509 | 0,006212504 | 0,010227683 |
| BNIP3L    | -0,269325972 | 7,779774978 | 0,006252625 | 0,01029125  |
| CLP1      | 0,192796973  | 4,207742997 | 0,006259015 | 0,010299281 |
| PNP       | 0,403694891  | 6,547909453 | 0,006266769 | 0,010309553 |

|          |              |             |             |             |
|----------|--------------|-------------|-------------|-------------|
| TSPAN15  | 0,381000441  | 6,991429653 | 0,006291295 | 0,010347405 |
| ST20     | 0,420555362  | 2,154737534 | 0,00635878  | 0,010455876 |
| SEP15    | 0,375276315  | 8,404147658 | 0,006360836 | 0,010456736 |
| TAF5L    | 0,182637251  | 5,654965466 | 0,006376335 | 0,010479688 |
| DNAJC7   | 0,196909128  | 6,619931258 | 0,006378514 | 0,010480743 |
| LYZ      | -0,628480113 | 10,60802721 | 0,006397477 | 0,01050937  |
| MTRF1L   | -0,179274213 | 5,268475587 | 0,006420755 | 0,01054507  |
| IGF2R    | -0,366619413 | 8,278503735 | 0,006429258 | 0,010556491 |
| NINJ1    | 0,349728779  | 6,618578217 | 0,006434444 | 0,010562464 |
| NT5DC3   | 0,389774391  | 4,61952047  | 0,006445228 | 0,010575263 |
| MAPK7    | -0,250481791 | 4,775758141 | 0,006445343 | 0,010575263 |
| MAPRE1   | 0,204879921  | 7,733986651 | 0,006495835 | 0,010655544 |
| TPP1     | -0,295133499 | 8,554981805 | 0,006515947 | 0,010685966 |
| SEMA4A   | -0,430764644 | 6,08389277  | 0,006549951 | 0,010739148 |
| AKAP1    | 0,304211305  | 6,934468063 | 0,006579071 | 0,0107843   |
| MPV17    | 0,272247571  | 6,024051389 | 0,00660118  | 0,01081794  |
| EDC3     | 0,258707723  | 5,593257253 | 0,006611081 | 0,010831562 |
| LETM1    | 0,229824875  | 6,185001354 | 0,006634983 | 0,010868111 |
| FAM54B   | -0,213479591 | 5,937989454 | 0,006645087 | 0,010882048 |
| HERC2P2  | -0,464886057 | 5,243945078 | 0,006658091 | 0,010900198 |
| PPP1R11  | 0,206615444  | 6,943967714 | 0,006659367 | 0,010900198 |
| PELI2    | -0,464457561 | 4,610750403 | 0,006688571 | 0,010945373 |
| RNF139   | 0,297149537  | 6,170595597 | 0,006736424 | 0,011021035 |
| CDC42EP1 | 0,468716401  | 7,506365963 | 0,006752598 | 0,011044846 |
| UBE3A    | -0,184056999 | 6,634949392 | 0,006774208 | 0,011077536 |
| MTRR     | -0,352156114 | 6,229676958 | 0,006779311 | 0,011083222 |
| TRNP1    | 0,813961299  | 5,267305147 | 0,006795056 | 0,011106301 |
| HIRA     | -0,269665319 | 5,536119168 | 0,006855394 | 0,011202236 |
| TEAD3    | 0,310991186  | 5,896353686 | 0,00687811  | 0,011236663 |
| MAN1A2   | 0,299223901  | 5,562828395 | 0,007001557 | 0,011435597 |
| PNMA1    | 0,348696631  | 5,806081188 | 0,007016734 | 0,01145764  |
| RAD21    | 0,258081916  | 8,408951311 | 0,007031489 | 0,011478985 |
| PMS1     | 0,208455468  | 4,124231888 | 0,007116376 | 0,011614785 |
| GPR107   | -0,205097541 | 7,429411394 | 0,007137823 | 0,011647001 |
| UBXN2A   | 0,188098923  | 4,458157795 | 0,007163745 | 0,011686502 |
| KHSRP    | 0,233606535  | 7,31728264  | 0,00717811  | 0,011707134 |
| RPL32P3  | -0,357255903 | 3,082998712 | 0,007255292 | 0,011830186 |
| VWA5A    | -0,420981161 | 6,148915945 | 0,007270147 | 0,011851574 |
| GCN1L1   | 0,274578194  | 7,446893486 | 0,007330881 | 0,011947724 |
| RIF1     | 0,337505532  | 5,501579633 | 0,007451807 | 0,012141155 |
| FAM115A  | -0,337078562 | 5,69842901  | 0,007453127 | 0,012141155 |
| COMMD3   | 0,342854595  | 5,531985778 | 0,007468777 | 0,012163743 |
| PLSCR1   | 0,36571963   | 6,823166204 | 0,007484756 | 0,012186855 |
| RCHY1    | -0,266445673 | 5,216724781 | 0,00755007  | 0,012290268 |
| COBRA1   | 0,19478498   | 6,659684965 | 0,00756902  | 0,012318174 |
| RSAD2    | -0,458818938 | 5,216091349 | 0,007589347 | 0,012348307 |
| MARCKS   | 0,336946505  | 7,982753642 | 0,007624482 | 0,012402514 |
| SYK      | -0,299555639 | 6,643796324 | 0,007626562 | 0,012402753 |
| DUSP10   | 0,380767319  | 4,800962914 | 0,007628266 | 0,012402753 |
| MED18    | 0,264646615  | 4,949982119 | 0,007655727 | 0,012444434 |

|          |              |             |             |             |
|----------|--------------|-------------|-------------|-------------|
| DIDO1    | -0,249393564 | 6,593788593 | 0,007658208 | 0,012445501 |
| NUP133   | 0,206118247  | 6,21014669  | 0,007663285 | 0,012450547 |
| GABARAP  | -0,220633742 | 8,702855806 | 0,007664965 | 0,012450547 |
| PLXND1   | -0,391974647 | 8,13872649  | 0,007688649 | 0,012486044 |
| PSMB6    | 0,257358589  | 6,922176942 | 0,007708828 | 0,012515833 |
| SCYL2    | 0,218975079  | 6,248783708 | 0,007762632 | 0,012600188 |
| TRIO     | 0,417090024  | 7,147060375 | 0,007769514 | 0,012608356 |
| ZBTB10   | 0,410740126  | 5,193166648 | 0,007816002 | 0,012678842 |
| UQCR10   | 0,348684014  | 6,766169729 | 0,007816667 | 0,012678842 |
| ARL6IP6  | 0,335336301  | 4,976163949 | 0,007832609 | 0,012701679 |
| AKT1     | -0,205127633 | 7,984361053 | 0,007838352 | 0,01270797  |
| XAB2     | -0,192704619 | 6,118528369 | 0,007882576 | 0,012776631 |
| EVI5L    | -0,229948254 | 4,75321772  | 0,007887949 | 0,012782301 |
| LEMD2    | 0,221168624  | 5,855213057 | 0,007964597 | 0,012903442 |
| UTP23    | 0,227417837  | 5,239210347 | 0,00797701  | 0,012920482 |
| RFX1     | -0,26556104  | 4,857193493 | 0,007980667 | 0,012923336 |
| FAM160A2 | -0,229699162 | 5,435903545 | 0,007992582 | 0,012939558 |
| CSDA     | -0,311723075 | 7,890685491 | 0,007997903 | 0,012945099 |
| TRPS1    | 0,476621506  | 4,451556851 | 0,008045284 | 0,013018697 |
| SYS1     | -0,211253974 | 6,248997242 | 0,008069749 | 0,013055189 |
| DCAF16   | 0,262732265  | 5,662118045 | 0,008128931 | 0,013147813 |
| C16orf5  | -0,320514333 | 5,476003056 | 0,008131358 | 0,013148619 |
| KIAA1586 | 0,258377469  | 3,364173274 | 0,008200927 | 0,013257971 |
| ISCA1    | -0,235945212 | 5,582282025 | 0,008214241 | 0,013275823 |
| EAPP     | 0,330924153  | 6,053650671 | 0,008215863 | 0,013275823 |
| FBXO21   | -0,238287758 | 6,350946481 | 0,008226464 | 0,013289803 |
| ZNF780B  | -0,279779346 | 4,219638565 | 0,008303625 | 0,013411278 |
| DR1      | 0,235860668  | 6,338085317 | 0,008330271 | 0,013451128 |
| CNST     | -0,239983902 | 5,65824144  | 0,008469486 | 0,013672686 |
| MIER2    | -0,282665833 | 4,952983353 | 0,008503849 | 0,01372491  |
| OPTN     | -0,283070889 | 6,967260126 | 0,008524743 | 0,013755376 |
| HEXB     | -0,270158997 | 7,855898454 | 0,008564042 | 0,013815519 |
| SMARCE1  | 0,218742361  | 7,592425605 | 0,008582084 | 0,01384135  |
| MLKL     | -0,328526506 | 4,658210591 | 0,008596303 | 0,013861005 |
| SHROOM2  | -0,434770315 | 4,563302242 | 0,008639156 | 0,01392681  |
| PEA15    | -0,24890818  | 8,296988428 | 0,008643184 | 0,01393001  |
| FAM134A  | 0,176591529  | 7,451075286 | 0,008646145 | 0,013931489 |
| CYFIP1   | -0,206798085 | 7,674689375 | 0,008655813 | 0,013943298 |
| ERGIC1   | 0,331515314  | 8,576948366 | 0,008657563 | 0,013943298 |
| KCTD1    | 0,514358398  | 4,347455637 | 0,008675089 | 0,013968224 |
| CTNBL1   | -0,201008658 | 6,009444469 | 0,008710611 | 0,014022109 |
| PHKA2    | -0,23131717  | 5,011372528 | 0,008720425 | 0,014034594 |
| YLPM1    | -0,311149392 | 6,60173345  | 0,008787302 | 0,014138889 |
| PKIA     | -0,576392423 | 3,482170137 | 0,008803771 | 0,014162047 |
| FAM100A  | -0,218828938 | 4,977628508 | 0,008892019 | 0,014300631 |
| EGLN1    | 0,263041411  | 6,472786797 | 0,00890062  | 0,014311089 |
| LYRM2    | -0,209357051 | 5,981973684 | 0,008912788 | 0,014327275 |
| IVNS1ABP | 0,236322132  | 7,539795946 | 0,008919848 | 0,014335244 |
| SUPT7L   | 0,18068114   | 6,109702956 | 0,008935811 | 0,014357516 |
| LPCAT2   | -0,328313538 | 5,499645635 | 0,008950386 | 0,014377546 |

|          |              |             |             |             |
|----------|--------------|-------------|-------------|-------------|
| TBCB     | 0,300022707  | 6,382014849 | 0,008955327 | 0,014382095 |
| COG5     | 0,206985703  | 6,185673583 | 0,008966868 | 0,014397238 |
| ANAPC2   | -0,194227483 | 5,342591879 | 0,008988426 | 0,014428456 |
| ARHGAP15 | -0,393516553 | 3,872540448 | 0,009107179 | 0,01461564  |
| STK38L   | 0,346402625  | 5,942431339 | 0,009180156 | 0,014729291 |
| ZNF121   | 0,28912303   | 2,342476703 | 0,009206307 | 0,014767775 |
| FBXO42   | -0,170405055 | 5,059763569 | 0,009275495 | 0,014875259 |
| PLXNA1   | -0,334223963 | 7,144787294 | 0,009288454 | 0,014892538 |
| ZNF670   | 0,344631681  | 2,468674211 | 0,009294435 | 0,014898625 |
| STAT2    | 0,239307063  | 7,325744723 | 0,009303054 | 0,014908937 |
| UBE2N    | 0,268553561  | 7,133843424 | 0,0093764   | 0,015022948 |
| UQCRC2   | 0,229707767  | 7,654448266 | 0,009431335 | 0,015107417 |
| MSH5     | 0,316990145  | 4,491693159 | 0,009523873 | 0,015252064 |
| TRIM33   | -0,222393824 | 6,063580546 | 0,009755524 | 0,015619375 |
| AGXT2L2  | -0,2755983   | 5,206103824 | 0,009800347 | 0,015687457 |
| ARHGAP10 | -0,300212947 | 4,653354656 | 0,009857882 | 0,015775849 |
| DAZAP1   | 0,179637619  | 6,761894447 | 0,00987972  | 0,015807089 |
| CASC3    | -0,223193574 | 7,177696758 | 0,009907607 | 0,015847988 |
| CTSZ     | -0,315879197 | 9,176746284 | 0,010011754 | 0,016010823 |
| EID3     | -0,471873048 | 1,466074258 | 0,010017333 | 0,01601599  |
| HLA-DMA  | -0,443234912 | 8,179860374 | 0,010090406 | 0,016129038 |
| ZNF484   | 0,347747493  | 2,870270294 | 0,010207908 | 0,016313036 |
| CDC42SE2 | 0,246008209  | 7,148189869 | 0,010260245 | 0,016389342 |
| ZNF673   | -0,205425851 | 4,061461634 | 0,010260463 | 0,016389342 |
| INPPL1   | 0,271558398  | 7,37832426  | 0,010265388 | 0,016393368 |
| SLC35C2  | 0,203370072  | 6,295794615 | 0,010271073 | 0,016398606 |
| GLO1     | 0,305163985  | 7,988570497 | 0,010278135 | 0,016406039 |
| GNAI1    | -0,433593947 | 5,30371231  | 0,010292571 | 0,016425239 |
| ITCH     | 0,185488102  | 6,68538924  | 0,01036583  | 0,016538277 |
| MON2     | -0,213005053 | 5,849546555 | 0,010427273 | 0,016632415 |
| POLR3GL  | -0,24847537  | 5,458670975 | 0,010442242 | 0,016652397 |
| RALGAPA2 | -0,461998667 | 5,702356143 | 0,010540401 | 0,016805003 |
| USO1     | 0,193163715  | 7,275996239 | 0,010568792 | 0,016844066 |
| OSGEP    | 0,282770233  | 5,213187346 | 0,010569843 | 0,016844066 |
| ZBTB25   | 0,24364042   | 2,978463987 | 0,010591141 | 0,016874063 |
| FUS      | 0,215009067  | 8,155220355 | 0,010618422 | 0,01691224  |
| CEP78    | 0,251620783  | 3,866445125 | 0,010622216 | 0,01691224  |
| C12orf75 | 0,775415417  | 5,049163384 | 0,010622543 | 0,01691224  |
| FAM102B  | -0,324268075 | 5,114460522 | 0,010630199 | 0,016920477 |
| RIPK2    | 0,362890091  | 5,400045158 | 0,010641297 | 0,01693419  |
| TGFB1    | -0,302400401 | 6,918916224 | 0,010659749 | 0,016959595 |
| DDAH1    | -0,354559934 | 7,358089795 | 0,010686233 | 0,016997766 |
| FXYD5    | 0,42663105   | 7,437113937 | 0,010690006 | 0,016999802 |
| MRPL43   | 0,285087835  | 6,371763889 | 0,010711471 | 0,017029966 |
| GNA15    | 0,372752944  | 5,487096465 | 0,010727369 | 0,017051266 |
| RPL5     | 0,374895214  | 10,43137075 | 0,010743185 | 0,017072426 |
| MAP2K2   | 0,203559393  | 7,043386799 | 0,010772921 | 0,017115692 |
| AIMP1    | 0,189197057  | 6,105677572 | 0,010785708 | 0,017132015 |
| ZCCHC14  | -0,268149992 | 5,89767657  | 0,010791738 | 0,017137145 |
| CTNND1   | -0,244907634 | 8,96705696  | 0,010793963 | 0,017137145 |



|          |              |             |             |             |
|----------|--------------|-------------|-------------|-------------|
| DYNC1H1  | -0,294523597 | 8,99816953  | 0,010820419 | 0,017174809 |
| ZNF669   | 0,202680421  | 3,423512618 | 0,010822724 | 0,017174809 |
| RASAL3   | -0,380242892 | 4,150571732 | 0,010873389 | 0,017251196 |
| POU2F2   | 0,491990731  | 3,499307836 | 0,010911621 | 0,017307826 |
| PRKRA    | 0,219447279  | 5,991098243 | 0,010923982 | 0,017323404 |
| USP34    | -0,247404547 | 7,170328473 | 0,010999264 | 0,01743873  |
| CDK6     | -0,437117221 | 5,350987141 | 0,011051005 | 0,01751669  |
| WDR82    | -0,175965024 | 7,441419839 | 0,011062156 | 0,017530292 |
| OAZ1     | -0,253462316 | 9,622630652 | 0,011089828 | 0,017570059 |
| PTGS1    | -0,384872027 | 5,16623236  | 0,011092719 | 0,017570558 |
| SOCS4    | -0,204364134 | 5,351518684 | 0,011103501 | 0,017583551 |
| NOSIP    | 0,27210225   | 5,75761126  | 0,011155399 | 0,017661635 |
| CDH11    | 0,476890093  | 7,174389111 | 0,011167002 | 0,017675903 |
| SMAD2    | -0,234055916 | 6,961434938 | 0,011203404 | 0,017729406 |
| OCIAD1   | 0,234770597  | 7,521072806 | 0,011248904 | 0,017793375 |
| FAM134C  | 0,202121673  | 7,082075631 | 0,011249045 | 0,017793375 |
| TFCP2    | 0,214133673  | 5,253402852 | 0,011254929 | 0,017798436 |
| MLL2     | -0,360228864 | 7,206698091 | 0,011257465 | 0,017798436 |
| ATP9B    | 0,354820609  | 6,619079142 | 0,011267736 | 0,017810545 |
| SNX33    | -0,23144458  | 5,938483114 | 0,011283676 | 0,017831607 |
| SOAT1    | 0,293573905  | 6,742715488 | 0,011318998 | 0,017883282 |
| TMEM179B | 0,302574046  | 6,562990959 | 0,0113597   | 0,017943431 |
| NUMBL    | 0,362694779  | 4,773690916 | 0,011363821 | 0,017945784 |
| PDIA5    | 0,271111198  | 5,739918363 | 0,011412586 | 0,018018621 |
| PRPF4B   | -0,171657151 | 6,612512715 | 0,011423914 | 0,018029247 |
| EMD      | 0,219728563  | 6,31407966  | 0,011424604 | 0,018029247 |
| MED17    | 0,163771102  | 5,286331277 | 0,011456854 | 0,018075958 |
| POFUT2   | 0,223707404  | 5,406293848 | 0,011533347 | 0,018192434 |
| ABCD4    | -0,188383751 | 5,377585567 | 0,0115894   | 0,018276622 |
| KIAA1731 | 0,260718057  | 4,307118349 | 0,01174572  | 0,018518859 |
| P2RX4    | 0,296940419  | 6,053523724 | 0,011770647 | 0,01855387  |
| ELF3     | 0,470475106  | 8,864054278 | 0,011804995 | 0,018603711 |
| PTDSS1   | 0,229754875  | 6,865322258 | 0,011811647 | 0,018609893 |
| FHOD3    | 0,716456208  | 3,936239943 | 0,011823762 | 0,018624678 |
| GPN3     | 0,271102883  | 5,20418628  | 0,011870526 | 0,018694023 |
| HNRNPD   | 0,215147589  | 7,927111529 | 0,01189727  | 0,018728079 |
| BAHD1    | -0,279536887 | 5,910060579 | 0,011897645 | 0,018728079 |
| EIF3C    | 0,237175826  | 7,658996029 | 0,012024234 | 0,018922975 |
| SNAI2    | 0,647642223  | 4,301643781 | 0,01203989  | 0,018941198 |
| SVIP     | 0,285499922  | 4,915186766 | 0,012041369 | 0,018941198 |
| MRP63    | 0,283980361  | 5,991806734 | 0,012085863 | 0,019006803 |
| REXO2    | 0,248397704  | 6,071564798 | 0,012099139 | 0,019023295 |
| TLE1     | 0,282341845  | 5,50868009  | 0,012128698 | 0,019065374 |
| PITRM1   | 0,219507956  | 6,813898445 | 0,012241666 | 0,019238516 |
| METTL6   | 0,174686212  | 4,193562215 | 0,012309431 | 0,019340555 |
| FAM8A1   | -0,260403302 | 6,519769772 | 0,012325345 | 0,019361099 |
| RNF217   | -0,371948921 | 2,456395651 | 0,012369607 | 0,019426151 |
| MED16    | -0,20006138  | 6,152304733 | 0,012406373 | 0,019479406 |
| UCP2     | 0,405826892  | 7,796343257 | 0,012412129 | 0,019480688 |
| PIK3CA   | -0,235274825 | 4,944319245 | 0,012412904 | 0,019480688 |

|           |              |             |             |             |
|-----------|--------------|-------------|-------------|-------------|
| MGEA5     | -0,213406647 | 7,391093866 | 0,012475536 | 0,019574478 |
| TDRD7     | -0,225365143 | 5,21121711  | 0,012484944 | 0,019584732 |
| DLG1      | -0,220676513 | 6,330595977 | 0,012507542 | 0,019615669 |
| UBB       | -0,214922265 | 10,14204755 | 0,012552086 | 0,019681001 |
| UPF3A     | -0,237797041 | 5,562291066 | 0,012599575 | 0,01975092  |
| WIPI1     | 0,262552672  | 5,499181988 | 0,01268231  | 0,019876044 |
| PTTG1IP   | 0,275650443  | 9,270963771 | 0,012700939 | 0,019900667 |
| SFI1      | -0,256390835 | 4,463830676 | 0,012719756 | 0,019925573 |
| RC3H2     | -0,260486759 | 4,607813415 | 0,012790241 | 0,020031385 |
| FER       | -0,23273053  | 3,198091522 | 0,012821083 | 0,020075078 |
| ZNF124    | 0,266498382  | 2,967628092 | 0,01284944  | 0,02011486  |
| GOSR1     | 0,211662462  | 6,743617048 | 0,012879448 | 0,020157209 |
| GSPT2     | -0,431567344 | 4,086736996 | 0,012906385 | 0,020194731 |
| BCAT1     | 0,699472411  | 7,123192204 | 0,012914143 | 0,020202235 |
| SRRM2     | -0,315705712 | 9,297626668 | 0,012995349 | 0,020324606 |
| RBM42     | 0,295164828  | 6,664279581 | 0,013058854 | 0,020419245 |
| WARS      | -0,410494737 | 8,857877119 | 0,013115736 | 0,020503485 |
| HNRNPA1L2 | 0,181287566  | 6,517172257 | 0,013129151 | 0,020519752 |
| COL6A1    | 0,455919024  | 8,625290597 | 0,013151727 | 0,020550327 |
| TSNAX     | 0,268092085  | 6,255165855 | 0,013165123 | 0,020566547 |
| TATDN2    | -0,17386186  | 6,127768071 | 0,013181852 | 0,020587963 |
| STK25     | 0,166549034  | 6,751440574 | 0,013199374 | 0,020610609 |
| VTA1      | 0,204828771  | 5,884544907 | 0,013202899 | 0,020611394 |
| RASSF4    | 0,401939996  | 6,279875773 | 0,013220235 | 0,020633733 |
| ATRX      | -0,263074442 | 6,689066386 | 0,013278761 | 0,020720337 |
| LEPROT    | -0,304923288 | 6,144509785 | 0,013341189 | 0,020812988 |
| TTC5      | 0,292986245  | 4,161583138 | 0,01336728  | 0,02084892  |
| SPIRE1    | -0,33799434  | 6,031231283 | 0,013409397 | 0,020909828 |
| RPS27A    | 0,312724452  | 9,857822872 | 0,01342968  | 0,020936669 |
| ISG20     | 0,4157466    | 5,583752456 | 0,013444562 | 0,020955078 |
| WDR36     | 0,187182345  | 5,576911661 | 0,013502863 | 0,021041138 |
| MMP2      | 0,455078786  | 8,821797561 | 0,013550568 | 0,021110652 |
| DHX9      | 0,165280776  | 7,951347705 | 0,013583336 | 0,021156867 |
| RASL11A   | -0,517406984 | 4,227527375 | 0,013588484 | 0,021160054 |
| KLHL7     | 0,277686218  | 5,546346495 | 0,013640736 | 0,02123657  |
| UFM1      | -0,19543597  | 7,033402887 | 0,013674774 | 0,021280936 |
| CDC27     | 0,163685245  | 6,488018749 | 0,013675475 | 0,021280936 |
| TOP1      | 0,297301231  | 7,946030844 | 0,013694179 | 0,02130518  |
| COX7C     | 0,28245702   | 8,184150418 | 0,01373474  | 0,021363411 |
| PLEKHF2   | -0,263623238 | 5,673188984 | 0,013768609 | 0,021411208 |
| FAU       | 0,334121179  | 9,136640453 | 0,013805099 | 0,021463057 |
| FBXO3     | -0,235034204 | 5,447290346 | 0,01385139  | 0,021530118 |
| GRWD1     | 0,198014816  | 5,687251665 | 0,013937468 | 0,021658977 |
| TRIM41    | -0,253299987 | 5,354842356 | 0,014007263 | 0,021762481 |
| NDUFB7    | 0,338852634  | 6,464683261 | 0,014145328 | 0,021971981 |
| RHOBTB3   | 0,437580763  | 7,034131681 | 0,014203021 | 0,022056571 |
| RFX5      | 0,242235787  | 6,445293827 | 0,014288892 | 0,022184871 |
| ATF2      | 0,219249944  | 5,076470115 | 0,014296445 | 0,022191545 |
| COTL1     | -0,338526288 | 8,021239019 | 0,014340528 | 0,022254906 |
| ABCC5     | 0,470063757  | 5,887867922 | 0,014373004 | 0,022300231 |

|           |              |             |             |             |
|-----------|--------------|-------------|-------------|-------------|
| AKT2      | 0,216362823  | 7,129875793 | 0,014395056 | 0,022329365 |
| GALT      | -0,195442737 | 4,824915721 | 0,014546423 | 0,022559031 |
| ANKRD50   | -0,321278037 | 6,120283292 | 0,014570904 | 0,022591859 |
| SAT1      | -0,302112823 | 9,433187855 | 0,014698154 | 0,022783977 |
| CEP350    | 0,226854414  | 6,279840294 | 0,014725909 | 0,022821812 |
| HMOX2     | 0,233430176  | 6,220866967 | 0,014731439 | 0,022825195 |
| GPX1      | 0,370948339  | 8,884183462 | 0,014829705 | 0,02297223  |
| BTBD3     | -0,326898867 | 5,705435816 | 0,014846608 | 0,022993191 |
| AKR1B1    | 0,514803501  | 7,186209241 | 0,014999386 | 0,023224526 |
| CNNM3     | -0,223307267 | 6,100859652 | 0,015015291 | 0,023243876 |
| SCAP      | -0,190923293 | 6,647387043 | 0,015035092 | 0,023269244 |
| SCARB2    | -0,200464329 | 8,876330627 | 0,015056262 | 0,023296721 |
| TAGLN     | -0,406506698 | 8,627321565 | 0,015068076 | 0,023309712 |
| SRPX      | -0,687699864 | 4,850434449 | 0,015094455 | 0,023345224 |
| ZNF506    | -0,274743714 | 4,746634905 | 0,015127032 | 0,023390302 |
| FAM129A   | -0,405784325 | 6,80088012  | 0,015137977 | 0,02340192  |
| HDGFRP3   | -0,392792363 | 5,05441703  | 0,01515275  | 0,023418513 |
| GOLGB1    | -0,274847399 | 7,493969177 | 0,015156661 | 0,023418513 |
| SNX3      | -0,240672169 | 7,74319263  | 0,015159014 | 0,023418513 |
| LOC282997 | -0,25769821  | 1,915820112 | 0,015240638 | 0,023539278 |
| TMEM123   | 0,243234986  | 8,885067739 | 0,01526661  | 0,023574052 |
| TPM1      | 0,356261913  | 7,872532282 | 0,015362135 | 0,023716187 |
| NRP2      | -0,385932571 | 6,810485489 | 0,015367121 | 0,023718515 |
| TP53I3    | 0,354404103  | 5,732130105 | 0,015398083 | 0,023760925 |
| STX18     | 0,18689238   | 5,373354657 | 0,015427068 | 0,023800266 |
| TREX1     | -0,235026908 | 4,385087918 | 0,015445524 | 0,02382335  |
| TXNDC11   | -0,257358649 | 7,363779356 | 0,015496768 | 0,023896983 |
| CNOT7     | 0,203023373  | 6,790254683 | 0,015520699 | 0,023927235 |
| ATG7      | -0,160370082 | 5,965607648 | 0,015523403 | 0,023927235 |
| RPS11     | 0,331934297  | 10,79682452 | 0,01563435  | 0,024092798 |
| CIQTNF3   | 0,685914107  | 4,176915704 | 0,015663087 | 0,024131629 |
| BRWD3     | 0,349044798  | 3,826347793 | 0,015666773 | 0,024131855 |
| MAP4K3    | 0,203499221  | 5,863246803 | 0,015716472 | 0,024202941 |
| HTRA1     | 0,395555716  | 7,079540698 | 0,01573561  | 0,024226942 |
| PPP2R2A   | 0,297159256  | 6,351379786 | 0,015757661 | 0,024255415 |
| FDFT1     | -0,30932183  | 7,669024829 | 0,015833811 | 0,024367131 |
| POLE4     | 0,359405152  | 5,743718061 | 0,015850529 | 0,024387355 |
| MLL4      | 0,274484262  | 6,318176484 | 0,015855149 | 0,02438896  |
| FAM193A   | -0,206352375 | 5,41449376  | 0,015904835 | 0,024457815 |
| APTX      | 0,204001617  | 5,133142939 | 0,015907084 | 0,024457815 |
| PPP4R1    | -0,209184058 | 7,498422545 | 0,015922632 | 0,024476201 |
| NRD1      | 0,183246644  | 7,458760834 | 0,015964989 | 0,024535781 |
| PLVAP     | 0,404405804  | 6,785232339 | 0,015980264 | 0,024553723 |
| THOC1     | 0,225803483  | 4,54580141  | 0,015996998 | 0,024573897 |
| GALNT10   | 0,384840286  | 7,079041573 | 0,016019402 | 0,024602771 |
| TAF7      | 0,24303439   | 7,508226495 | 0,016222074 | 0,024908426 |
| THAP11    | -0,156162597 | 5,472057492 | 0,016302839 | 0,025026803 |
| ANKRD27   | -0,242237693 | 5,879068503 | 0,016320506 | 0,025048285 |
| RUNX3     | -0,397636634 | 4,916477447 | 0,016425447 | 0,025203673 |
| NF1       | 0,288737706  | 6,846207877 | 0,016470096 | 0,025266498 |

|           |              |             |             |             |
|-----------|--------------|-------------|-------------|-------------|
| TNIP2     | 0,211423885  | 5,698121805 | 0,016491117 | 0,025293056 |
| HK2       | -0,407980431 | 6,979027775 | 0,016610994 | 0,025471187 |
| CLU       | -0,569861896 | 9,061720256 | 0,016691073 | 0,025586702 |
| CTSD      | -0,314467448 | 11,51093901 | 0,016693831 | 0,025586702 |
| COX16     | 0,229770371  | 6,077624343 | 0,016712831 | 0,025610066 |
| FAM160B1  | -0,174130824 | 5,503057223 | 0,016745867 | 0,025654924 |
| CSTF2T    | -0,153202162 | 5,652246376 | 0,016750768 | 0,025656668 |
| SCRN3     | 0,189836655  | 4,604530509 | 0,01676676  | 0,025675395 |
| KLHL20    | -0,208151095 | 4,993733279 | 0,016774516 | 0,025681505 |
| HIC2      | -0,326731753 | 3,212117105 | 0,016794772 | 0,025706745 |
| ZFAND3    | 0,191003728  | 6,938709045 | 0,01690988  | 0,025873753 |
| SP140L    | 0,244288376  | 5,070295958 | 0,01691147  | 0,025873753 |
| YPEL5     | -0,26093805  | 7,661556239 | 0,016985314 | 0,025980902 |
| FUT11     | -0,231665772 | 3,988595834 | 0,016999768 | 0,025997178 |
| ATP5F1    | 0,253383865  | 7,637265371 | 0,017114573 | 0,026164003 |
| CREBZF    | 0,258332865  | 6,250379959 | 0,01711653  | 0,026164003 |
| ANKHD1    | -0,231774108 | 6,806464725 | 0,017145281 | 0,026200749 |
| PCGF6     | 0,181367849  | 3,942513455 | 0,017148536 | 0,026200749 |
| PPARD     | 0,237064348  | 6,477980981 | 0,017152096 | 0,026200749 |
| SEC24B    | -0,157805356 | 6,010593997 | 0,017221284 | 0,026300545 |
| TFE3      | -0,239451784 | 6,715834617 | 0,017299807 | 0,02641455  |
| PCDHB14   | 0,40806407   | 3,010390539 | 0,017316771 | 0,026431485 |
| FKBP5     | -0,46711031  | 7,407721244 | 0,01731865  | 0,026431485 |
| APIG1     | -0,169964673 | 7,308901672 | 0,017329046 | 0,026441433 |
| TOR1A     | 0,178563005  | 6,039029462 | 0,017449169 | 0,026618767 |
| TIAM1     | -0,431363843 | 4,521681017 | 0,017509861 | 0,026705378 |
| IREB2     | -0,190355333 | 6,279728903 | 0,017673217 | 0,026948495 |
| SIGLEC10  | 0,39910953   | 4,616981753 | 0,017788615 | 0,027118392 |
| UBE3C     | 0,185128314  | 7,088368066 | 0,017793833 | 0,027120284 |
| USP22     | -0,244081422 | 8,10848873  | 0,017812874 | 0,027143238 |
| EIF2A     | 0,170715204  | 7,034105181 | 0,017874702 | 0,027226685 |
| MDM2      | 0,432656032  | 7,684473953 | 0,017875622 | 0,027226685 |
| PRPF31    | 0,173737573  | 6,162656704 | 0,017988388 | 0,027392322 |
| GNPTG     | 0,247074129  | 6,60195227  | 0,01801278  | 0,027423342 |
| WDR54     | -0,37010068  | 4,573821242 | 0,018020231 | 0,027428561 |
| ARL17A    | 0,346231499  | 4,620396966 | 0,018213313 | 0,027716265 |
| SRBD1     | -0,164080317 | 4,736230448 | 0,018246093 | 0,027759953 |
| RPL9      | 0,421989193  | 10,98700314 | 0,018255877 | 0,027768643 |
| ELAC2     | 0,174194444  | 6,258748294 | 0,018276334 | 0,02779356  |
| RPS23     | 0,28281319   | 9,921910764 | 0,018285654 | 0,027801533 |
| C3orf17   | 0,162281989  | 5,805210108 | 0,018353321 | 0,027898194 |
| DHRS7     | 0,295019997  | 7,005277002 | 0,018398752 | 0,027961019 |
| HEXIM1    | -0,256786343 | 6,280862416 | 0,018404966 | 0,027964229 |
| NECAP2    | -0,214791954 | 7,069276058 | 0,018496417 | 0,028096918 |
| LOC728190 | -0,168601982 | 5,019326101 | 0,0185495   | 0,028171278 |
| EXOSC8    | 0,254422678  | 4,512917225 | 0,018584671 | 0,028218408 |
| ZNF436    | 0,216496308  | 4,712346913 | 0,018596264 | 0,028229724 |
| PCID2     | 0,250351738  | 5,558950431 | 0,018668065 | 0,028332415 |
| MLXIP     | -0,278584082 | 6,260401591 | 0,018958801 | 0,028767259 |
| ZDHHC8    | -0,241981507 | 5,472259089 | 0,019051124 | 0,028900915 |

|              |              |             |             |             |
|--------------|--------------|-------------|-------------|-------------|
| MATR3        | -0,124479012 | 8,595333326 | 0,019139637 | 0,029028733 |
| PRPSAP2      | 0,22065266   | 5,230861691 | 0,019329903 | 0,029310787 |
| PPP2R1A      | 0,16608695   | 8,378836866 | 0,019399132 | 0,029409222 |
| ZNF148       | -0,147408894 | 6,157570035 | 0,019465181 | 0,029502793 |
| RRBP1        | 0,323024543  | 8,834168031 | 0,019558998 | 0,029638402 |
| DUSP14       | 0,308735066  | 4,838784402 | 0,019626257 | 0,029733714 |
| PVR          | -0,302991198 | 6,546689591 | 0,019714126 | 0,029860202 |
| MTF2         | 0,214589467  | 5,039594754 | 0,019740406 | 0,029893367 |
| ADAM10       | -0,233695834 | 6,916031592 | 0,019749733 | 0,02990085  |
| ELN          | -0,528155188 | 7,234131596 | 0,019768088 | 0,029921996 |
| NDUFA4       | 0,345093603  | 8,129196771 | 0,019853683 | 0,030042813 |
| INVS         | -0,185063274 | 3,783568937 | 0,019856718 | 0,030042813 |
| IFNAR2       | 0,261233453  | 5,866546473 | 0,019893641 | 0,030092001 |
| GPC1         | 0,444459885  | 6,414720592 | 0,019905897 | 0,030103862 |
| LUM          | 0,451036919  | 9,722814301 | 0,019915294 | 0,030111395 |
| NFU1         | 0,27656115   | 5,484947097 | 0,019976634 | 0,030196707 |
| MKL2         | -0,27035076  | 6,396070906 | 0,019980575 | 0,030196707 |
| SEC24C       | 0,172416052  | 7,659745199 | 0,019996083 | 0,030213448 |
| MT1X         | -0,563144529 | 5,926609954 | 0,020058391 | 0,030300879 |
| HNRNPH1      | -0,193174158 | 8,193109595 | 0,020162332 | 0,03045115  |
| LOC100170939 | -0,308509866 | 2,162649679 | 0,020225484 | 0,030539765 |
| SPHK1        | 0,507489393  | 4,34469138  | 0,020318895 | 0,030674019 |
| TMEM19       | -0,21058384  | 5,894579543 | 0,020470866 | 0,030896599 |
| FBN1         | 0,468108238  | 7,373516424 | 0,020499827 | 0,030933463 |
| ZNF24        | -0,245795459 | 6,924404885 | 0,020525205 | 0,030963159 |
| PTPRA        | -0,183132173 | 6,850149515 | 0,020528588 | 0,030963159 |
| BAP1         | -0,156953936 | 6,577585079 | 0,020598158 | 0,03106122  |
| AGPAT1       | 0,180157562  | 6,888211793 | 0,020632387 | 0,031105958 |
| PFN1         | 0,200407556  | 9,708045625 | 0,020654817 | 0,031128858 |
| MED25        | -0,211947201 | 5,94644802  | 0,020656707 | 0,031128858 |
| RAB7A        | -0,166310739 | 8,665139937 | 0,020696903 | 0,031182541 |
| SOD2         | -0,38171268  | 9,069844913 | 0,020774944 | 0,031293206 |
| NDUFA3       | 0,273630391  | 5,719617138 | 0,020792121 | 0,031312163 |
| NTAN1        | -0,225034128 | 5,142988645 | 0,020808523 | 0,031329945 |
| FUNDC2       | 0,337829843  | 6,952088281 | 0,020900464 | 0,031461427 |
| SUMO3        | 0,255084407  | 7,512122895 | 0,020947066 | 0,031522847 |
| TAGLN2       | 0,295472994  | 10,74286948 | 0,020950512 | 0,031522847 |
| ETFDH        | -0,185923972 | 4,492634557 | 0,020956765 | 0,031525299 |
| CUX1         | -0,235238055 | 7,27348393  | 0,021054083 | 0,031664709 |
| CLPX         | 0,181681607  | 5,475173605 | 0,021074778 | 0,031688845 |
| POLA1        | 0,23761172   | 4,701164309 | 0,021084619 | 0,031696652 |
| MFSD6        | -0,243433775 | 6,861032442 | 0,021098935 | 0,031711183 |
| KLHL8        | -0,180872418 | 4,95751553  | 0,021174471 | 0,031817699 |
| PRKAR2B      | -0,415466947 | 4,532298205 | 0,021284508 | 0,031975999 |
| TLE3         | 0,245788288  | 6,586287727 | 0,021319063 | 0,032020856 |
| SIX5         | 0,236653654  | 4,817619261 | 0,021423867 | 0,032171184 |
| F13A1        | 0,626040537  | 6,79568725  | 0,02147133  | 0,032235358 |
| ARHGEF35     | 0,321076586  | 4,675319729 | 0,021515088 | 0,032293943 |
| MTMR3        | -0,236501825 | 6,499785818 | 0,021645057 | 0,032481876 |
| RAB3IP       | 0,603502101  | 6,29122778  | 0,021795473 | 0,032700403 |

|           |              |             |             |             |
|-----------|--------------|-------------|-------------|-------------|
| FAM120A   | 0,178379424  | 8,252963695 | 0,021830414 | 0,032745622 |
| VAV2      | 0,26491413   | 6,164194788 | 0,021886266 | 0,032822179 |
| WDR60     | -0,235436287 | 4,840578049 | 0,021891368 | 0,032822612 |
| BPGM      | 0,305183974  | 5,456002044 | 0,021965529 | 0,032923661 |
| C10orf137 | 0,228356999  | 4,418228421 | 0,02196842  | 0,032923661 |
| KDM4A     | -0,193644532 | 6,243935417 | 0,022041031 | 0,033025224 |
| RPS25     | 0,244552026  | 9,671142838 | 0,022063424 | 0,033051513 |
| HIGD2A    | 0,263203712  | 6,290208473 | 0,022322434 | 0,033430132 |
| ANXA2P2   | -0,338023144 | 6,446653135 | 0,022325975 | 0,033430132 |
| MTSS1     | -0,373855106 | 5,923553831 | 0,022366028 | 0,033482753 |
| EWSR1     | -0,165598889 | 7,978887838 | 0,022386173 | 0,033505557 |
| CTSH      | -0,560059048 | 10,15693261 | 0,022406572 | 0,033528729 |
| BRD1      | -0,224615205 | 5,763189431 | 0,022417648 | 0,033537942 |
| RPL23     | 0,25181559   | 9,858452424 | 0,022575308 | 0,033766402 |
| KIFAP3    | -0,208454246 | 5,83743546  | 0,022943781 | 0,034310009 |
| NEDD4     | -0,274612298 | 4,58211331  | 0,022965606 | 0,034335116 |
| PLEKHA5   | 0,29302493   | 5,904601768 | 0,023008539 | 0,034391764 |
| PPP2R1B   | 0,257986452  | 5,745610833 | 0,023116334 | 0,034545317 |
| SH3RF1    | -0,283983704 | 6,237048613 | 0,023163461 | 0,03460816  |
| ATP6V0B   | 0,333242967  | 7,73613411  | 0,023461116 | 0,035045202 |
| SMC6      | 0,202553017  | 5,345196373 | 0,023503133 | 0,035100276 |
| FN3K      | 0,309871259  | 5,039362803 | 0,023556388 | 0,035172107 |
| DDX20     | -0,155399996 | 4,578298804 | 0,023697772 | 0,035375462 |
| FAM178A   | -0,167020242 | 5,512660897 | 0,023746381 | 0,035440265 |
| SMARCD3   | -0,335701246 | 5,169347147 | 0,023797427 | 0,035508678 |
| OTUD6B    | 0,234198666  | 4,15611237  | 0,023811701 | 0,035522203 |
| PPP2R5C   | -0,145205473 | 7,37245588  | 0,023855712 | 0,035580074 |
| H2AFY2    | 0,463142486  | 4,422151102 | 0,023936992 | 0,035693495 |
| CYBASC3   | -0,167954966 | 6,251934712 | 0,023967352 | 0,035730952 |
| NDST2     | -0,180755394 | 5,176016409 | 0,024069046 | 0,035874716 |
| UBE2E1    | 0,213079995  | 6,766699382 | 0,024310805 | 0,036227137 |
| HS2ST1    | 0,241682325  | 6,234181508 | 0,024353856 | 0,036283362 |
| TAF9B     | -0,206422888 | 5,280264769 | 0,024397856 | 0,036340974 |
| HSP90AA1  | 0,212658316  | 10,60488831 | 0,024521913 | 0,036517783 |
| COX4I1    | 0,307717034  | 8,52568887  | 0,024578372 | 0,036593839 |
| TMEM203   | 0,196342637  | 5,731693133 | 0,024583719 | 0,036593839 |
| NDUFA6    | 0,272131089  | 6,296544035 | 0,024638391 | 0,036667217 |
| KLHDC5    | -0,27932085  | 5,33505787  | 0,02468535  | 0,036729086 |
| SNHG12    | 0,364676318  | 4,075852627 | 0,024705047 | 0,036750375 |
| POLRMT    | 0,231702492  | 5,671188993 | 0,024902751 | 0,037036393 |
| KIAA0664  | 0,269508598  | 6,574136826 | 0,024911353 | 0,037041107 |
| TPM4      | -0,251722605 | 9,72750532  | 0,024931636 | 0,037063184 |
| ZSCAN29   | -0,183370409 | 4,924202667 | 0,025025551 | 0,037194689 |
| RAB32     | -0,339770926 | 5,538875031 | 0,025041149 | 0,037209761 |
| ZNF211    | -0,260106634 | 4,038509848 | 0,025170476 | 0,037393786 |
| RAB27A    | -0,302772739 | 6,691379697 | 0,025220265 | 0,037454879 |
| BTBD1     | -0,146006635 | 6,494835658 | 0,025222585 | 0,037454879 |
| TIA1      | 0,264114096  | 6,410742019 | 0,025287329 | 0,037542847 |
| RPP14     | -0,131201271 | 5,018490623 | 0,025335352 | 0,037605956 |
| GPNMB     | -0,44973572  | 8,961875923 | 0,025353743 | 0,037625065 |

|           |              |             |             |             |
|-----------|--------------|-------------|-------------|-------------|
| ARAF      | -0,168201108 | 6,837833524 | 0,025368271 | 0,037638433 |
| CXorf56   | 0,203069369  | 4,055386042 | 0,025443451 | 0,037741764 |
| SNHG5     | 0,474481465  | 7,020257646 | 0,025521609 | 0,037849468 |
| ITGA1     | -0,38850588  | 6,461405873 | 0,025664073 | 0,038052471 |
| GNAI3     | 0,164042199  | 7,158714168 | 0,025707486 | 0,038108553 |
| HAT1      | 0,166625083  | 5,932788041 | 0,02581924  | 0,038264327 |
| MANBAL    | 0,202044221  | 6,314791743 | 0,025823792 | 0,038264327 |
| CWF19L1   | 0,234609862  | 5,331846151 | 0,025899117 | 0,038367603 |
| ITGA6     | -0,441654469 | 7,061623547 | 0,025911243 | 0,03837723  |
| CREBBP    | -0,231938966 | 7,204878515 | 0,025921961 | 0,038384767 |
| PAM       | 0,343930905  | 8,476566991 | 0,025933487 | 0,038393498 |
| CDC23     | 0,143454121  | 5,521912515 | 0,026047224 | 0,038553509 |
| CCDC47    | 0,199804749  | 7,822163235 | 0,026098172 | 0,038620537 |
| GTF3C5    | 0,188787986  | 6,003362916 | 0,026327719 | 0,038951771 |
| MBD1      | -0,152596912 | 5,92385216  | 0,026533262 | 0,039247357 |
| EIF5A2    | 0,28990665   | 3,773376383 | 0,026558777 | 0,039276578 |
| SUCLG1    | 0,24061494   | 6,664461757 | 0,026747633 | 0,039547292 |
| BIRC3     | 0,495815753  | 6,479813964 | 0,026788492 | 0,039599117 |
| PIGN      | 0,203751883  | 5,195971708 | 0,026957133 | 0,039839768 |
| ELF4      | -0,263733172 | 5,940329964 | 0,027088541 | 0,040025301 |
| F11R      | -0,231473174 | 9,06720577  | 0,027281389 | 0,040301515 |
| NIN       | -0,260083051 | 5,893138633 | 0,027351962 | 0,040397017 |
| RND3      | -0,381240861 | 5,82682939  | 0,027516534 | 0,040631278 |
| MIOS      | 0,169562905  | 5,228850447 | 0,027538324 | 0,040654651 |
| SPATA2L   | -0,242654308 | 4,209190234 | 0,027559233 | 0,040676712 |
| CDC26     | 0,185309484  | 4,840622328 | 0,027649647 | 0,04080133  |
| PELP1     | 0,223896277  | 6,343039107 | 0,02769467  | 0,040858925 |
| SNAPC1    | 0,255826269  | 4,568149879 | 0,027805455 | 0,041008091 |
| CAPNS1    | -0,213386173 | 9,062067503 | 0,027807804 | 0,041008091 |
| ZNF282    | 0,204638956  | 5,474559203 | 0,02790378  | 0,04114073  |
| GYS1      | 0,204807295  | 6,134700078 | 0,028154385 | 0,041501244 |
| ZNF180    | -0,208082734 | 3,38368565  | 0,02824073  | 0,041619524 |
| GLA       | 0,269169371  | 5,415660605 | 0,028321748 | 0,041729904 |
| TRIM65    | 0,190596323  | 5,404512822 | 0,028343    | 0,041752196 |
| CD63      | 0,263840213  | 10,49215398 | 0,028395812 | 0,041820959 |
| CAPN2     | -0,259534451 | 9,464031536 | 0,028406165 | 0,041826138 |
| TNFRSF10B | 0,280217081  | 6,991491071 | 0,028411596 | 0,041826138 |
| RPL6      | 0,22216981   | 10,05995789 | 0,028526779 | 0,041986641 |
| PPP2R2D   | 0,17324126   | 5,318979121 | 0,028624251 | 0,042121011 |
| TRRAP     | 0,30788889   | 6,873929731 | 0,028691843 | 0,042211365 |
| MTMR1     | 0,182629176  | 5,719397719 | 0,028792975 | 0,042351013 |
| POMGNT1   | 0,199708105  | 6,875341015 | 0,028854071 | 0,042431725 |
| AHCYL2    | -0,467649185 | 7,90521744  | 0,028928759 | 0,042532387 |
| MRPL50    | 0,219679452  | 4,918601259 | 0,02919996  | 0,042921864 |
| SLC38A1   | 0,375897447  | 7,12009219  | 0,029231041 | 0,04295829  |
| RGMB      | -0,289009753 | 5,315230163 | 0,029386265 | 0,043177104 |
| SLC9A6    | -0,196740296 | 5,193064112 | 0,029534118 | 0,043384997 |
| EXOC3     | 0,202141952  | 6,483367252 | 0,029540904 | 0,043385618 |
| PI4KB     | 0,173414112  | 6,966956686 | 0,02960878  | 0,043475941 |
| VPRBP     | -0,177572548 | 5,817507839 | 0,029638076 | 0,043509589 |

|           |              |             |             |             |
|-----------|--------------|-------------|-------------|-------------|
| APPBP2    | -0,154918879 | 6,096165683 | 0,029822683 | 0,043771174 |
| HNRNPA2B1 | 0,175384964  | 9,653824182 | 0,029853358 | 0,043806768 |
| SYF2      | -0,142874086 | 6,225388853 | 0,030168516 | 0,044259705 |
| NEDD1     | 0,173513042  | 4,937517404 | 0,030289854 | 0,04442816  |
| ANKRD52   | 0,28193918   | 6,244428751 | 0,030462224 | 0,044671378 |
| PPP3CB    | -0,150602495 | 6,212472195 | 0,030482488 | 0,044691483 |
| GPKOW     | 0,2361166    | 5,178265675 | 0,03067823  | 0,044968799 |
| FBXL4     | 0,175110851  | 4,253480797 | 0,030727797 | 0,045031774 |
| POLR2J2   | 0,32992986   | 5,215032204 | 0,030922272 | 0,045307041 |
| ITPR2     | -0,319282384 | 6,060728801 | 0,031041746 | 0,045465805 |
| LARGE     | -0,401237366 | 4,78081871  | 0,031043964 | 0,045465805 |
| RPRD1B    | 0,181076057  | 5,826610239 | 0,031065576 | 0,045482664 |
| AP4B1     | 0,215657333  | 4,59385882  | 0,031068815 | 0,045482664 |
| HGSNAT    | 0,309599289  | 7,483634133 | 0,031150724 | 0,045592786 |
| UBE2J1    | 0,171941008  | 7,183329521 | 0,031319351 | 0,045829754 |
| RBM17     | -0,164030375 | 6,45292332  | 0,031362529 | 0,045883091 |
| APOBEC3G  | 0,380596886  | 5,0320064   | 0,03137238  | 0,045887657 |
| PPAP2A    | -0,272403104 | 5,737624832 | 0,031382466 | 0,045892567 |
| TAB1      | -0,158489338 | 5,369297664 | 0,031399624 | 0,045907812 |
| PIP4K2B   | -0,179334712 | 6,827996762 | 0,031517455 | 0,046070209 |
| BAZ1A     | 0,282283819  | 6,734384169 | 0,031524914 | 0,046071237 |
| TRNT1     | 0,201122171  | 4,403011578 | 0,031630373 | 0,046215452 |
| FTH1      | -0,242475999 | 12,07864018 | 0,031680753 | 0,046279146 |
| PGAP3     | 0,25626037   | 6,165803555 | 0,031772658 | 0,046403461 |
| SARNP     | 0,237465291  | 5,852027941 | 0,031842237 | 0,046495121 |
| UBA52     | 0,200225028  | 9,104679521 | 0,03203607  | 0,046768136 |
| NSFL1C    | 0,176525491  | 6,772135685 | 0,03210241  | 0,046854951 |
| KIF16B    | -0,250117597 | 5,311462849 | 0,032166366 | 0,046938252 |
| SUDS3     | 0,221895844  | 6,316445262 | 0,032180463 | 0,046947659 |
| EXOSC10   | 0,141859416  | 6,416855284 | 0,032186583 | 0,046947659 |
| STRADA    | 0,153125008  | 5,226402001 | 0,032334156 | 0,047152825 |
| HNRNPA0   | -0,167893101 | 7,731052721 | 0,032384234 | 0,047215757 |
| ENDOG     | 0,269950619  | 3,695456049 | 0,032471215 | 0,047332454 |
| ATPAF1    | 0,153846545  | 6,041956602 | 0,032497944 | 0,047361292 |
| MICALL1   | -0,250496027 | 5,582522646 | 0,032560296 | 0,047442021 |
| SH2B1     | -0,222250683 | 5,75781969  | 0,032617505 | 0,047515225 |
| MRPL23    | 0,240798906  | 5,632179444 | 0,032736698 | 0,047678672 |
| NHP2L1    | 0,186651169  | 7,260992623 | 0,032771129 | 0,047718627 |
| RING1     | -0,143210188 | 5,936828591 | 0,032987861 | 0,048023959 |
| PI4KAP1   | -0,272323572 | 4,359994548 | 0,033017648 | 0,048057064 |
| KIAA1598  | -0,25589957  | 6,417377855 | 0,033178235 | 0,048280492 |
| PSME1     | 0,241891885  | 8,283916384 | 0,033216734 | 0,048326202 |
| ASAP1     | -0,281259295 | 6,190493968 | 0,033325624 | 0,048474281 |
| ARPC1B    | 0,254297145  | 8,636485989 | 0,033553745 | 0,04879569  |
| GLCE      | 0,257914566  | 5,915311791 | 0,033820276 | 0,049172806 |
| CLPTM1    | 0,183553529  | 7,573386489 | 0,034025217 | 0,049460233 |
| HNRNPU    | 0,176270088  | 9,263406212 | 0,034117013 | 0,049583101 |
| RB1CC1    | -0,173644268 | 6,628867241 | 0,034129643 | 0,049590888 |
| TRIP10    | -0,223582954 | 6,299100626 | 0,034151848 | 0,04961258  |
| RNF41     | -0,160773263 | 6,201478875 | 0,03425218  | 0,049747735 |



|         |              |             |             |             |
|---------|--------------|-------------|-------------|-------------|
| UBE2D3  | -0,165094166 | 8,633743975 | 0,03432594  | 0,049844247 |
| IGFBP5  | 0,477438746  | 9,056431656 | 0,034449695 | 0,0500133   |
| ARFGAP3 | 0,202340295  | 6,597148481 | 0,034530871 | 0,050120478 |
| KDM5C   | 0,224296508  | 7,282087923 | 0,034552787 | 0,050141616 |
| OXCT1   | 0,388517881  | 5,255369494 | 0,034656106 | 0,050280848 |
| ZNF564  | -0,192066627 | 3,905354397 | 0,034664866 | 0,050282859 |
| PLBD2   | 0,219506276  | 5,937171311 | 0,034721028 | 0,050353613 |
| FLYWCH1 | -0,176745278 | 5,116306129 | 0,034755127 | 0,050392348 |
| TACSTD2 | 0,407984245  | 8,824843266 | 0,034858704 | 0,050531782 |
| TMBIM1  | -0,251680473 | 8,675619326 | 0,035171149 | 0,050972323 |
| YWHAH   | -0,163094274 | 7,915406757 | 0,035177555 | 0,050972323 |
| CMTM7   | -0,276594171 | 5,371487744 | 0,035193619 | 0,050984764 |
| CASP4   | 0,285168959  | 6,938719761 | 0,035276776 | 0,051094378 |
| NARG2   | -0,161143174 | 5,643912578 | 0,035548344 | 0,05147678  |
| GLUD1   | -0,17697513  | 7,826574881 | 0,035606339 | 0,051549815 |
| MARCH7  | -0,143591838 | 6,897628929 | 0,035616706 | 0,051552261 |
| SIN3A   | -0,158355385 | 6,669471189 | 0,035623149 | 0,051552261 |
| CCNT2   | 0,163299056  | 5,617792347 | 0,035768701 | 0,051751914 |
| RNF167  | -0,150770598 | 7,01259163  | 0,035992294 | 0,052064373 |
| RBM25   | -0,167615861 | 6,678742602 | 0,036038335 | 0,052119916 |
| UBR3    | -0,211847007 | 6,062113531 | 0,036122022 | 0,052229871 |
| IFI27   | 0,494637903  | 8,972105858 | 0,036245114 | 0,052396742 |
| TCF12   | -0,178730996 | 6,391039406 | 0,036272143 | 0,052424701 |
| MKRN1   | 0,144437682  | 7,439242393 | 0,036614861 | 0,052908824 |
| UHRF2   | 0,305135577  | 5,449579947 | 0,036626737 | 0,052914771 |
| ENTPD4  | 0,205914503  | 5,282198335 | 0,036917358 | 0,053323335 |
| ROGDI   | -0,231614829 | 5,262744147 | 0,036958638 | 0,053371654 |
| OCEL1   | -0,24157948  | 4,449526719 | 0,036994999 | 0,053412852 |
| FBXW11  | -0,185854579 | 6,41632094  | 0,037038466 | 0,053464289 |
| DCP1B   | -0,20861782  | 4,089534334 | 0,037146185 | 0,053608431 |
| QRICH1  | -0,12943032  | 6,429527998 | 0,037331842 | 0,053864967 |
| ZNF45   | -0,197282556 | 4,009644583 | 0,037382576 | 0,053926759 |
| PPCDC   | 0,245907786  | 3,862486458 | 0,037535174 | 0,054135438 |
| SAMD4B  | 0,209313992  | 6,84243729  | 0,037798605 | 0,054500098 |
| HSPBP1  | 0,227061283  | 5,694630081 | 0,037803998 | 0,054500098 |
| RPRD1A  | 0,264543752  | 6,409171253 | 0,037836571 | 0,054535527 |
| MLH1    | -0,133053616 | 5,562434309 | 0,037860637 | 0,054558683 |
| ZNF302  | -0,236889544 | 5,018847805 | 0,037913325 | 0,054623064 |
| TMEM189 | 0,21704218   | 6,075618027 | 0,037957358 | 0,054674952 |
| POLR2J3 | 0,316500392  | 5,769421292 | 0,037974815 | 0,054680915 |
| STC1    | 0,616448912  | 5,704293941 | 0,037977535 | 0,054680915 |
| ZNF410  | 0,224501072  | 6,369965452 | 0,038134597 | 0,054895465 |
| ZNF585A | 0,223575554  | 3,258048811 | 0,0383171   | 0,055146539 |
| SIPA1   | 0,201291075  | 6,360727818 | 0,038335315 | 0,055161113 |
| SPRED1  | -0,268691644 | 7,169508524 | 0,038420477 | 0,05527199  |
| CD58    | -0,304841941 | 4,72949062  | 0,038942459 | 0,056011101 |
| MED29   | 0,213080742  | 6,709812486 | 0,039045351 | 0,056147248 |
| CCNDBP1 | -0,240269169 | 6,311409074 | 0,039056806 | 0,056151878 |
| SFPQ    | 0,171668485  | 8,116420926 | 0,039095206 | 0,056195239 |
| NAPEPLD | -0,200116792 | 4,904730995 | 0,039186329 | 0,056314348 |

|          |              |             |             |             |
|----------|--------------|-------------|-------------|-------------|
| TMLHE    | 0,32148203   | 3,659874429 | 0,03920501  | 0,056329322 |
| SLC35A5  | -0,18331234  | 5,73349619  | 0,039222359 | 0,056331186 |
| GPSM3    | -0,27966802  | 6,021770481 | 0,039222829 | 0,056331186 |
| FRS2     | 0,402925369  | 5,838750973 | 0,039385911 | 0,05655349  |
| STK17B   | -0,261876497 | 7,213574842 | 0,039404768 | 0,056568655 |
| PCMT1    | -0,16664141  | 6,3982131   | 0,039444398 | 0,056613629 |
| ST3GAL1  | -0,359791555 | 7,043495167 | 0,039482821 | 0,056656852 |
| CREB3L1  | 0,548826758  | 7,108363922 | 0,039627255 | 0,056852146 |
| PHF1     | -0,171538909 | 6,209530305 | 0,039717176 | 0,056969168 |
| SFXN3    | -0,249169004 | 6,479617318 | 0,039978485 | 0,057331922 |
| PLAUR    | 0,387807946  | 6,974354747 | 0,040050914 | 0,057423714 |
| DGKD     | -0,299168766 | 6,209765429 | 0,040091644 | 0,057470027 |
| IPO8     | -0,187564271 | 6,427132313 | 0,040117191 | 0,057494561 |
| ZNF101   | 0,192413369  | 3,290891494 | 0,040166851 | 0,057553637 |
| PRDM4    | -0,152879885 | 5,591073348 | 0,040329448 | 0,057774475 |
| MORC4    | 0,202574048  | 6,41584623  | 0,040616429 | 0,058173373 |
| NSMCE4A  | -0,200305156 | 5,060239748 | 0,040641267 | 0,058196723 |
| SEPT7P2  | -0,195623053 | 3,728571821 | 0,040650264 | 0,058197386 |
| XPNPEP3  | 0,179528433  | 4,24100541  | 0,040862793 | 0,058489375 |
| ANKRD9   | 0,293905122  | 2,992513805 | 0,0408797   | 0,058501296 |
| THRAP3   | -0,14568177  | 7,666261576 | 0,041128676 | 0,058845246 |
| HERPUD2  | -0,130939915 | 5,874432758 | 0,041234728 | 0,058984605 |
| OSBPL3   | 0,274491722  | 5,735544466 | 0,041399656 | 0,059208107 |
| VCP      | 0,147086861  | 8,819645991 | 0,041441448 | 0,059255449 |
| ILKAP    | 0,178533749  | 4,918484114 | 0,041505325 | 0,059334342 |
| MTX3     | -0,202300567 | 4,959761877 | 0,041595714 | 0,059451095 |
| ATE1     | -0,214030562 | 3,987029355 | 0,041611436 | 0,059461103 |
| METTL4   | 0,204528659  | 3,99325144  | 0,041675263 | 0,059539832 |
| MKLN1    | -0,150101755 | 6,523151306 | 0,041737223 | 0,059615861 |
| LPAR6    | -0,308413976 | 4,828006089 | 0,041813266 | 0,05971197  |
| G0S2     | 0,611518692  | 5,672740488 | 0,041877244 | 0,059790814 |
| SLC7A6OS | 0,138878134  | 3,282407192 | 0,041945318 | 0,05987547  |
| TARBP1   | 0,222506412  | 5,293586099 | 0,042007688 | 0,059951951 |
| WSB1     | -0,323855143 | 8,122123594 | 0,042132929 | 0,060118108 |
| C6orf1   | 0,262559832  | 5,046680531 | 0,042170957 | 0,060159782 |
| ARMCX3   | -0,178716636 | 6,415512083 | 0,042241476 | 0,060247777 |
| TMEM161A | 0,191968808  | 5,085800109 | 0,042523624 | 0,060637513 |
| SPOPL    | -0,153741325 | 5,713461507 | 0,042617319 | 0,060758415 |
| TULP3    | 0,206478312  | 5,277281181 | 0,042666967 | 0,060816481 |
| UNC50    | 0,213901073  | 5,763849018 | 0,042682224 | 0,060825515 |
| STK35    | 0,216900571  | 6,040622415 | 0,042725876 | 0,060875    |
| ITGA4    | -0,315367821 | 5,243515729 | 0,042864259 | 0,061059407 |
| MED22    | -0,181784327 | 5,468440399 | 0,042930383 | 0,061140828 |
| AGPAT6   | 0,247271953  | 6,953315466 | 0,042990467 | 0,061213614 |
| FAM149B1 | -0,151831887 | 4,912155135 | 0,043004885 | 0,061221359 |
| PEX3     | -0,22665762  | 4,423629157 | 0,043046911 | 0,061268396 |
| KLF16    | 0,258136005  | 5,062755417 | 0,043069011 | 0,061277357 |
| SMARCA1  | 0,284261544  | 6,568859323 | 0,043071179 | 0,061277357 |
| ISOC1    | -0,176323965 | 5,213790202 | 0,043317828 | 0,061615409 |
| PPRC1    | -0,221567477 | 6,197881788 | 0,043507553 | 0,061872368 |

|           |              |             |             |             |
|-----------|--------------|-------------|-------------|-------------|
| GIGYF2    | -0,176484777 | 6,613570974 | 0,043557537 | 0,061924336 |
| GPS2      | -0,160479532 | 5,545347424 | 0,043562259 | 0,061924336 |
| NFE2L1    | -0,190185797 | 8,666845728 | 0,043703146 | 0,062111662 |
| MYNN      | 0,224495853  | 5,005167579 | 0,043728636 | 0,062134938 |
| RDH11     | -0,177574113 | 6,883302519 | 0,043852631 | 0,062298143 |
| SUMF2     | 0,257187861  | 8,314454188 | 0,044018958 | 0,062521407 |
| LOC349196 | -0,273189598 | 3,48243041  | 0,044062369 | 0,062570032 |
| PTPRJ     | -0,246840625 | 6,443554209 | 0,044213076 | 0,06277097  |
| ZNF320    | 0,213521488  | 5,100166102 | 0,044257937 | 0,062821581 |
| MEX3C     | 0,186148854  | 5,70703095  | 0,044629389 | 0,063335651 |
| UBE2D2    | 0,145536372  | 6,919478072 | 0,044846594 | 0,063630654 |
| GBP5      | 0,495622455  | 5,639730568 | 0,044867459 | 0,063647016 |
| TTL       | -0,219079886 | 5,743317219 | 0,045025803 | 0,063858351 |
| DNAJB9    | 0,285730397  | 6,672180043 | 0,045069576 | 0,06390163  |
| PHF20L1   | 0,155390116  | 5,901440646 | 0,045080154 | 0,06390163  |
| CTNNB1    | 0,216082302  | 9,602039016 | 0,045084432 | 0,06390163  |
| PDPR      | -0,258408547 | 5,71992109  | 0,045284486 | 0,064171843 |
| CDC42BPA  | 0,355595127  | 7,066910867 | 0,045325165 | 0,064216144 |
| MRPS22    | 0,188073279  | 5,134687578 | 0,045500291 | 0,064450869 |
| PSPC1     | 0,157326276  | 5,60045112  | 0,045600846 | 0,06457989  |
| EIF2C3    | 0,198617861  | 3,192621198 | 0,045745253 | 0,064770946 |
| IL7       | -0,336272439 | 2,797799872 | 0,045760804 | 0,064779515 |
| ZBTB2     | -0,153007191 | 4,802705858 | 0,045773009 | 0,064783343 |
| ZNF280D   | -0,195210119 | 5,156786863 | 0,045861382 | 0,064894951 |
| DHX33     | 0,233163556  | 4,091735505 | 0,04588002  | 0,064907854 |
| ZUFSP     | -0,146800138 | 3,375590213 | 0,046038013 | 0,065117861 |
| ZNF197    | -0,166700211 | 4,375959782 | 0,046140625 | 0,065249466 |
| TMEM175   | -0,197435568 | 4,903431288 | 0,046166909 | 0,065271151 |
| APOOL     | 0,202908817  | 3,630014239 | 0,046175104 | 0,065271151 |
| VHL       | 0,18345654   | 5,53939636  | 0,046438362 | 0,065629677 |
| BCAR3     | -0,283704914 | 5,130670607 | 0,046567971 | 0,065799212 |
| EFR3A     | 0,178434855  | 7,306178387 | 0,046675497 | 0,06593748  |
| ITGB2     | -0,355433158 | 8,342914549 | 0,046732656 | 0,066004552 |
| NUP214    | -0,178179345 | 6,473604917 | 0,046758106 | 0,066026822 |
| IPO5      | 0,192713202  | 7,715500047 | 0,046851303 | 0,066144727 |
| TMEM57    | 0,176360062  | 5,926503716 | 0,046997114 | 0,06633685  |
| OBSL1     | 0,368512677  | 6,282102224 | 0,047020585 | 0,066356244 |
| CELSR2    | 0,413780844  | 4,899065062 | 0,047407009 | 0,066887729 |
| RAB43     | 0,193612996  | 7,041917768 | 0,04757258  | 0,067103089 |
| ANXA2     | -0,294731424 | 10,82816483 | 0,047579328 | 0,067103089 |
| PEX26     | 0,185102624  | 4,682241227 | 0,047724228 | 0,06729353  |
| UPK3BL    | 0,385976651  | 4,607998343 | 0,047815267 | 0,06740796  |
| CCNY      | -0,154568515 | 7,199423236 | 0,047849902 | 0,067442844 |
| SLC12A2   | 0,387573278  | 6,613647933 | 0,047938726 | 0,067554075 |
| TRIM5     | -0,183125008 | 5,476695582 | 0,048002806 | 0,0676304   |
| GTF2F2    | 0,168248676  | 4,959824438 | 0,048098628 | 0,067749155 |
| GDE1      | 0,214056119  | 7,681862837 | 0,048106967 | 0,067749155 |
| DPH1      | 0,147598301  | 6,078319086 | 0,048130303 | 0,067768024 |
| NBAS      | -0,155030156 | 6,122514197 | 0,048161139 | 0,067797442 |
| FAM46A    | 0,351142389  | 6,239211599 | 0,048387193 | 0,068101604 |

|          |              |             |             |             |
|----------|--------------|-------------|-------------|-------------|
| WARS2    | 0,181061923  | 4,497097579 | 0,048407212 | 0,068115719 |
| CNOT3    | 0,179859593  | 5,960379244 | 0,048461396 | 0,068177895 |
| SEC23B   | 0,191561275  | 7,025906777 | 0,048558073 | 0,068299814 |
| LAP3     | -0,201127364 | 7,620989687 | 0,048618616 | 0,068370869 |
| BCL10    | 0,253528601  | 5,567920192 | 0,048645801 | 0,068394993 |
| ACOT7    | 0,263600569  | 5,503678081 | 0,048865164 | 0,068689251 |
| EML4     | 0,230462603  | 7,407016708 | 0,04903355  | 0,068911743 |
| TUSC3    | 0,427953063  | 6,017209847 | 0,049049671 | 0,068920195 |
| MANSC1   | 0,388369366  | 5,816693862 | 0,049108622 | 0,068988812 |
| SH3GLB2  | -0,191675009 | 6,245369314 | 0,049230876 | 0,069146312 |
| SNX5     | -0,149480887 | 7,185881267 | 0,049440411 | 0,06942631  |
| DAGLB    | 0,199443776  | 5,543007537 | 0,049494967 | 0,06948861  |
| PRPF18   | -0,13349636  | 4,881846521 | 0,049522649 | 0,069513163 |
| KIAA0226 | -0,182173042 | 5,781365813 | 0,049533348 | 0,069513872 |
| ZMYND8   | 0,224516941  | 6,258835962 | 0,049648327 | 0,069660893 |
| WDR13    | -0,172639437 | 6,732653704 | 0,049709403 | 0,069720478 |
| NPL      | -0,366895181 | 5,265091497 | 0,049711243 | 0,069720478 |
| NT5C2    | 0,163844097  | 7,170557803 | 0,049886467 | 0,069951844 |
| MIP      | 0,202370402  | 5,124747699 | 0,050084492 | 0,070215081 |
| CTNNA1   | -0,178828496 | 9,441946057 | 0,050217588 | 0,070387201 |
| CD2BP2   | 0,126347073  | 6,704183456 | 0,050241449 | 0,070406174 |
| DYNLL1   | 0,203331443  | 7,773267053 | 0,050274869 | 0,070438532 |
| MIDN     | -0,26704416  | 7,456091937 | 0,050602786 | 0,070883401 |
| TAF1B    | 0,170729793  | 4,315856989 | 0,050635685 | 0,070914919 |
| NDUFB2   | 0,236405541  | 6,652166167 | 0,050667065 | 0,070944295 |
| ACAP2    | -0,229607228 | 6,469809671 | 0,050700002 | 0,070975839 |
| PARD3    | 0,238863754  | 6,259994676 | 0,050795452 | 0,071094866 |
| ARL8A    | -0,140932885 | 6,463079405 | 0,050852957 | 0,071160745 |
| AIP      | 0,210502466  | 6,593585612 | 0,05092022  | 0,071236609 |
| ANGPTL2  | 0,357885433  | 6,29915881  | 0,050928064 | 0,071236609 |
| ACOT8    | 0,200925642  | 4,872421663 | 0,051143681 | 0,071523535 |
| SNRNP48  | 0,190920204  | 4,485065824 | 0,051210822 | 0,071602747 |
| PCSK7    | -0,189416889 | 5,759745259 | 0,05132757  | 0,071751271 |
| PRKAR2A  | -0,227480668 | 4,748399329 | 0,051539723 | 0,072033075 |
| RPRD2    | 0,202506571  | 6,645008056 | 0,051576849 | 0,072065947 |
| TNFRSF14 | -0,224727789 | 6,383610403 | 0,051585763 | 0,072065947 |
| PARG     | 0,140422883  | 4,944736926 | 0,051594949 | 0,072065947 |
| PHF16    | 0,199206174  | 4,498207227 | 0,05167245  | 0,072159418 |
| COG8     | 0,133547607  | 4,812330575 | 0,051685282 | 0,072162559 |
| CDKN2AIP | -0,154180464 | 4,927323527 | 0,051741723 | 0,072226573 |
| CSK      | 0,170589643  | 6,580832678 | 0,051840252 | 0,072349299 |
| FCHO2    | -0,236790682 | 6,663380057 | 0,051947927 | 0,072484739 |
| RPS13    | 0,26220204   | 9,252860048 | 0,05215977  | 0,07276544  |
| PNN      | 0,265797587  | 6,763158944 | 0,052283179 | 0,07291056  |
| KCTD11   | -0,188989168 | 5,036140999 | 0,052287851 | 0,07291056  |
| SLC29A1  | 0,227119893  | 6,802985394 | 0,052295872 | 0,07291056  |
| TSC22D4  | 0,169696618  | 6,24449607  | 0,05230803  | 0,072912604 |
| ZMYM2    | 0,187926756  | 6,260246589 | 0,05242524  | 0,073061049 |
| MFHAS1   | -0,291452502 | 5,584669354 | 0,052520083 | 0,073178269 |
| ING2     | -0,189593894 | 3,829407907 | 0,052608178 | 0,073280682 |

|           |              |             |             |             |
|-----------|--------------|-------------|-------------|-------------|
| VPS11     | -0,133230989 | 6,253631539 | 0,052615079 | 0,073280682 |
| KDM3A     | 0,171539626  | 6,344431482 | 0,052925966 | 0,073698624 |
| POLR2A    | -0,232325231 | 8,260641707 | 0,0529885   | 0,073770638 |
| BTBD9     | -0,316106297 | 6,349637263 | 0,053083294 | 0,073887525 |
| ZNF830    | -0,136910389 | 4,361553197 | 0,05317879  | 0,07400534  |
| PRKX      | -0,220553042 | 5,401658649 | 0,053304921 | 0,074165733 |
| DIS3      | -0,122721275 | 6,074579969 | 0,053690508 | 0,07468698  |
| ADO       | -0,1292703   | 5,232113662 | 0,053770435 | 0,074782908 |
| POLR1E    | 0,200818549  | 4,71228946  | 0,053879546 | 0,074919377 |
| DUS3L     | 0,187829698  | 4,525270291 | 0,054014224 | 0,075091334 |
| RRP7B     | 0,189621279  | 4,301225462 | 0,054337538 | 0,075525412 |
| C12orf57  | 0,326582598  | 6,825179204 | 0,05435194  | 0,075530034 |
| AGAP6     | -0,269195318 | 2,934169929 | 0,054427472 | 0,075619587 |
| SUPT6H    | -0,196955055 | 7,562669636 | 0,054780048 | 0,07609394  |
| H1FX      | 0,205196824  | 7,146752532 | 0,054857898 | 0,07618656  |
| FXN       | -0,132850058 | 4,149874803 | 0,055006382 | 0,076377219 |
| GUSB      | 0,174889959  | 7,252599848 | 0,055182269 | 0,076605842 |
| BTAFL1    | -0,20277791  | 5,53634407  | 0,055279044 | 0,076724567 |
| LRPAP1    | -0,198053171 | 7,808189413 | 0,05534464  | 0,076799979 |
| CRKL      | -0,144783851 | 7,03165381  | 0,055378604 | 0,076824596 |
| RP9       | 0,201518077  | 3,758334563 | 0,055396053 | 0,076824596 |
| TTC14     | -0,213674487 | 4,980301261 | 0,055396178 | 0,076824596 |
| GPR108    | -0,171459539 | 6,590401894 | 0,055466888 | 0,076907017 |
| GOLGA3    | 0,2106579    | 7,167494567 | 0,055966786 | 0,07758437  |
| SH3BP1    | 0,201315577  | 5,307174243 | 0,056272121 | 0,077991787 |
| EDEM2     | 0,201052656  | 6,469511799 | 0,056373855 | 0,078116911 |
| REXO1     | -0,172524877 | 5,337385293 | 0,056717494 | 0,078577121 |
| ALDH7A1   | 0,198822159  | 6,174273791 | 0,056871606 | 0,078774626 |
| SBNO2     | 0,259334316  | 7,05981455  | 0,057205561 | 0,079221105 |
| ZNF507    | 0,17257702   | 5,08650786  | 0,057253432 | 0,0792713   |
| PGRMC1    | 0,20280555   | 7,733975247 | 0,057384619 | 0,079436808 |
| C19orf66  | -0,169677494 | 5,305829826 | 0,057588516 | 0,07970146  |
| RWDD2B    | 0,217204737  | 4,776242481 | 0,057599178 | 0,07970146  |
| FBXO31    | -0,142791193 | 5,075641862 | 0,057659085 | 0,079768168 |
| BCL9L     | 0,250952739  | 7,359287895 | 0,057760345 | 0,079892046 |
| BRAP      | 0,126853507  | 5,182039475 | 0,057917592 | 0,080087695 |
| PLK2      | -0,336434053 | 6,121021309 | 0,057925284 | 0,080087695 |
| PPP1R9B   | -0,184875434 | 6,799972898 | 0,058110394 | 0,080327342 |
| NUDT19    | 0,264410338  | 5,38897092  | 0,058170541 | 0,080394186 |
| MDM4      | -0,20132372  | 5,993479888 | 0,058444927 | 0,080757033 |
| SLC38A2   | -0,240899718 | 8,166658889 | 0,058537895 | 0,080869106 |
| MYOF      | 0,298009414  | 8,389423034 | 0,058696265 | 0,081057508 |
| BRD4      | -0,193100642 | 6,760987019 | 0,058698045 | 0,081057508 |
| RRAGC     | -0,163228272 | 4,966996715 | 0,058743964 | 0,081104493 |
| GABARAPL2 | -0,204238292 | 6,956791262 | 0,058851943 | 0,081237126 |
| PHLDA1    | 0,370633076  | 7,114270561 | 0,059060544 | 0,081508571 |
| SF3B2     | 0,127109794  | 8,336848679 | 0,059104253 | 0,081552388 |
| NDUFB8    | 0,209720648  | 5,865943106 | 0,059307987 | 0,081816946 |
| MIER3     | 0,171168434  | 5,151940465 | 0,059367823 | 0,081882926 |
| DGCR6L    | 0,213902575  | 5,743523239 | 0,059390456 | 0,081897578 |

|           |              |             |             |             |
|-----------|--------------|-------------|-------------|-------------|
| C10orf118 | -0,213621002 | 5,516230323 | 0,059418602 | 0,081919823 |
| UPF2      | -0,180214185 | 5,73674238  | 0,059570352 | 0,082112439 |
| C14orf93  | 0,166518782  | 3,728216901 | 0,059597906 | 0,082133816 |
| CCL4      | -0,430561461 | 4,166163072 | 0,059626782 | 0,082157007 |
| OSBPL8    | -0,144441536 | 6,780936054 | 0,059763898 | 0,082318158 |
| STON2     | -0,320521842 | 3,562485039 | 0,059767884 | 0,082318158 |
| RNGTT     | 0,141711292  | 4,846914934 | 0,059826012 | 0,082381578 |
| BAG1      | -0,243311508 | 6,972525163 | 0,059996506 | 0,082599672 |
| DNASE2    | -0,146824048 | 6,964287872 | 0,060195641 | 0,082857101 |
| TMED10P1  | 0,162589597  | 1,802662981 | 0,060439527 | 0,08317601  |
| LCORL     | 0,202975431  | 2,729055246 | 0,060579189 | 0,08335139  |
| MAFB      | -0,295326004 | 6,20022439  | 0,060615837 | 0,083384989 |
| ERP29     | 0,201317838  | 8,210981925 | 0,060741427 | 0,083540902 |
| ATP6V1E1  | -0,15928082  | 7,476465807 | 0,060891439 | 0,083730334 |
| TM7SF3    | 0,281243152  | 7,420114538 | 0,06102347  | 0,083894968 |
| VPS29     | 0,253938679  | 6,651713291 | 0,061203697 | 0,084125783 |
| FUT4      | 0,291500811  | 4,318447929 | 0,061438418 | 0,084431394 |
| DNAJC21   | 0,153824723  | 6,634733762 | 0,061499113 | 0,084497774 |
| ATP11C    | 0,227502523  | 4,976232631 | 0,061702779 | 0,084743888 |
| CD151     | -0,221059514 | 9,051025968 | 0,061711985 | 0,084743888 |
| RPS9      | 0,267180158  | 10,28810675 | 0,061715523 | 0,084743888 |
| PUM2      | -0,116465468 | 7,603073827 | 0,062165135 | 0,085344081 |
| CBWD1     | -0,143355597 | 4,739439252 | 0,062439272 | 0,085703179 |
| UBE2L3    | 0,140724152  | 7,313634162 | 0,062514254 | 0,085788831 |
| GLRX      | -0,317326838 | 6,242916357 | 0,062817049 | 0,086187013 |
| CCDC104   | -0,181010675 | 5,754240907 | 0,062886044 | 0,08626432  |
| DDX1      | 0,121364517  | 7,142761032 | 0,063065684 | 0,086493342 |
| NDUFA5    | -0,151036766 | 6,494247648 | 0,063244431 | 0,086721049 |
| SMARCC2   | -0,167405806 | 7,370935388 | 0,063298294 | 0,086777456 |
| RNF8      | -0,127286651 | 4,814806523 | 0,063312802 | 0,086779899 |
| COMT      | -0,215674697 | 7,548233583 | 0,063513713 | 0,087037783 |
| SURF1     | 0,213960013  | 6,021162032 | 0,063852805 | 0,087484886 |
| NCDN      | 0,18687352   | 5,490869441 | 0,063939295 | 0,087585789 |
| GPR153    | -0,322590814 | 5,022813277 | 0,064059382 | 0,087732662 |
| ATP6AP1   | -0,155022696 | 8,223519474 | 0,06424727  | 0,087972316 |
| ATP6V1A   | -0,131551997 | 7,127379335 | 0,064401919 | 0,08816637  |
| WDR59     | 0,158211048  | 5,417904965 | 0,064555774 | 0,088344363 |
| SRGAP1    | 0,324559452  | 4,451860038 | 0,06456229  | 0,088344363 |
| ZNF543    | -0,151967132 | 3,270807131 | 0,064570803 | 0,088344363 |
| WIPF1     | -0,233392366 | 6,732813412 | 0,0646498   | 0,088434702 |
| STXBP1    | -0,33310776  | 6,871504152 | 0,064889554 | 0,088744859 |
| CIC       | -0,18338894  | 6,649965688 | 0,064930451 | 0,088782985 |
| PGGT1B    | -0,121203062 | 4,708861369 | 0,065026349 | 0,088896286 |
| ACO2      | -0,15401247  | 7,194533611 | 0,065151914 | 0,089050091 |
| C3orf18   | -0,224207014 | 3,265060181 | 0,065312459 | 0,089251634 |
| FLII      | -0,165030077 | 7,890709909 | 0,065383371 | 0,089330637 |
| EIF3K     | 0,206250521  | 7,677933523 | 0,065726634 | 0,089781634 |
| CDKN1B    | -0,151843878 | 6,633519578 | 0,065994297 | 0,090129203 |
| CKB       | -0,407509159 | 7,189710539 | 0,066109166 | 0,090268003 |
| PDS5A     | 0,127870866  | 7,636393822 | 0,066137656 | 0,090271325 |

|              |              |             |             |             |
|--------------|--------------|-------------|-------------|-------------|
| PCBP2        | 0,147662286  | 9,671951146 | 0,066138076 | 0,090271325 |
| PIGX         | 0,175809792  | 5,331536675 | 0,06691369  | 0,091311678 |
| TRAFD1       | 0,153648658  | 6,383950874 | 0,067143109 | 0,091606414 |
| ELP2         | 0,184473367  | 6,10051112  | 0,067189497 | 0,09164739  |
| MAPK8IP3     | 0,285141435  | 5,680220857 | 0,067200022 | 0,09164739  |
| ZNF431       | -0,218296723 | 4,08116985  | 0,067512584 | 0,092049019 |
| RGS19        | -0,197685208 | 5,006543884 | 0,067521512 | 0,092049019 |
| ATP11A       | -0,327652151 | 8,642776693 | 0,067691119 | 0,092261791 |
| VEGFC        | -0,401522442 | 3,906693002 | 0,067706512 | 0,09226433  |
| LOC100216545 | 0,28337403   | 2,271855762 | 0,067772442 | 0,092325829 |
| GTF2H1       | -0,129843668 | 5,73520154  | 0,067778721 | 0,092325829 |
| PTPN23       | -0,154688322 | 6,49282127  | 0,067845377 | 0,092398167 |
| GAA          | -0,231154337 | 7,974412128 | 0,068196942 | 0,092858415 |
| CDC16        | -0,140845102 | 6,238190103 | 0,0682559   | 0,09292014  |
| ERI1         | 0,176654558  | 4,856528513 | 0,068335733 | 0,093010253 |
| PGM2         | 0,216746575  | 5,28852135  | 0,0684386   | 0,093131674 |
| FAM133B      | -0,12318412  | 4,992751125 | 0,069022325 | 0,093907269 |
| ZNF271       | -0,164773429 | 5,145547219 | 0,069137402 | 0,094045072 |
| RSL24D1      | 0,311173223  | 7,327385566 | 0,0691946   | 0,094104105 |
| ALKBH8       | -0,193081848 | 3,675755381 | 0,069617768 | 0,09466073  |
| AGPAT3       | -0,161553432 | 7,116111503 | 0,069631994 | 0,094661197 |
| ESYT2        | 0,211092089  | 8,088888674 | 0,069706359 | 0,094743405 |
| C19orf6      | -0,151469632 | 7,044086704 | 0,069930925 | 0,095029689 |
| ANP32B       | 0,152181655  | 7,711924947 | 0,070152404 | 0,095311664 |
| MLX          | 0,174269948  | 6,722849652 | 0,070186089 | 0,095320496 |
| SKIL         | -0,212584578 | 5,50198834  | 0,070186862 | 0,095320496 |
| EFNA1        | 0,312890314  | 8,041685879 | 0,070407233 | 0,095600741 |
| ACTN1        | 0,256555191  | 8,225581099 | 0,070942703 | 0,096308639 |
| ADCK2        | 0,181267519  | 5,619009346 | 0,071072388 | 0,096465489 |
| MFGE8        | 0,240122479  | 7,147448303 | 0,071135175 | 0,096531494 |
| SUMF1        | -0,17504502  | 6,146985671 | 0,071259415 | 0,096680849 |
| NUP98        | -0,13974422  | 7,252487927 | 0,071592292 | 0,097113157 |
| UQCR11       | 0,237658908  | 6,943782964 | 0,072103894 | 0,09778768  |
| GCC2         | -0,187959627 | 6,121158672 | 0,072644264 | 0,098500942 |
| TMEM205      | 0,193033837  | 6,547772132 | 0,072839098 | 0,098745489 |
| DCLRE1C      | 0,146718667  | 4,501766463 | 0,072853581 | 0,098745491 |
| MIA3         | 0,190142709  | 6,943761526 | 0,072879004 | 0,098760319 |
| TMEM106A     | 0,198829298  | 4,015855871 | 0,073012945 | 0,098922168 |
| FRRS1        | 0,280012168  | 3,346684608 | 0,073184757 | 0,099135252 |
| LPP          | 0,252959149  | 5,086388362 | 0,073212192 | 0,099152719 |
| RFX7         | -0,168830875 | 4,876806668 | 0,073450595 | 0,099455839 |
| MYSM1        | -0,215048919 | 2,907406065 | 0,073531695 | 0,099545887 |
| ZNF678       | 0,17814094   | 2,479973607 | 0,073919655 | 0,100051236 |
| MFAP3        | -0,128126609 | 5,749149563 | 0,074092431 | 0,100265189 |
| FMR1         | -0,151606468 | 6,203136769 | 0,074118088 | 0,100280008 |
| ASB3         | 0,185228465  | 4,742294306 | 0,074295826 | 0,100500543 |
| C21orf91     | -0,234609945 | 4,959913939 | 0,074397336 | 0,100617896 |
| RBM3         | 0,204304476  | 8,688560054 | 0,074430469 | 0,100642747 |
| CALM2        | 0,254275143  | 10,05202424 | 0,074591697 | 0,100840758 |
| TNRC6A       | -0,17865314  | 5,978421485 | 0,074849253 | 0,101168891 |

|          |              |             |             |             |
|----------|--------------|-------------|-------------|-------------|
| KIAA0528 | -0,195861327 | 5,669148739 | 0,075030965 | 0,101394401 |
| ZNF177   | -0,24860655  | 1,827372441 | 0,075074598 | 0,101433264 |
| CD248    | 0,320430658  | 5,580686432 | 0,07518012  | 0,10153591  |
| CHIC2    | -0,185854833 | 4,371425684 | 0,07518035  | 0,10153591  |
| STARD3   | 0,159628201  | 6,212283019 | 0,075197061 | 0,101538369 |
| COQ2     | 0,170367237  | 4,283218344 | 0,075275065 | 0,101623573 |
| ADD3     | -0,287713758 | 6,853177825 | 0,075300598 | 0,101637922 |
| TMEM135  | 0,193135554  | 5,086096295 | 0,075317496 | 0,101640611 |
| MAP3K5   | -0,230700097 | 5,765868081 | 0,075441356 | 0,101787615 |
| SAFB     | -0,167399652 | 6,861946247 | 0,075546167 | 0,101908865 |
| LUC7L2   | -0,103614694 | 6,820546969 | 0,075593779 | 0,101952923 |
| CHD4     | 0,189168597  | 8,428130332 | 0,075953279 | 0,102417522 |
| DGCR2    | -0,16332207  | 7,720358775 | 0,076073314 | 0,1025591   |
| SCAMP2   | -0,1672589   | 7,662182219 | 0,076366963 | 0,102934636 |
| KLHDC3   | 0,156742194  | 6,998532133 | 0,07691698  | 0,103655511 |
| NOP10    | 0,237903705  | 6,603829582 | 0,077576709 | 0,104523924 |
| CISH     | -0,292109047 | 6,049815612 | 0,077834384 | 0,104850388 |
| KLHDC2   | 0,207996688  | 6,252688862 | 0,077931712 | 0,104960764 |
| SKIV2L2  | 0,132621141  | 6,504965495 | 0,077968076 | 0,104989003 |
| SLC25A43 | 0,195228499  | 5,371079757 | 0,07846428  | 0,105636314 |
| DOLK     | 0,144058537  | 4,925884595 | 0,078577693 | 0,105768118 |
| LMF2     | 0,15710993   | 6,700079349 | 0,078898438 | 0,106178892 |
| UROD     | 0,194716374  | 6,425222903 | 0,079122869 | 0,106459913 |
| EPHB4    | 0,238946157  | 7,300148879 | 0,07923968  | 0,10659605  |
| WLS      | -0,326892887 | 7,065529808 | 0,079260714 | 0,106603315 |
| ATG9A    | 0,134591012  | 6,400959796 | 0,079286604 | 0,106617108 |
| NGDN     | 0,156603923  | 5,276852258 | 0,079392805 | 0,106738868 |
| CDIPT    | -0,130449736 | 7,025037211 | 0,079507279 | 0,1068717   |
| UBTD2    | 0,162247806  | 5,631727895 | 0,079785668 | 0,107224767 |
| PABPN1   | 0,160328658  | 7,242605797 | 0,079869286 | 0,107315993 |
| UCK1     | -0,131186208 | 5,284149677 | 0,080111118 | 0,107619723 |
| HAGH     | -0,18726403  | 5,870183569 | 0,08014153  | 0,107639373 |
| MIER1    | -0,160022285 | 6,277327817 | 0,080174613 | 0,1076626   |
| SERGEF   | -0,159670423 | 4,348357874 | 0,080552525 | 0,108148782 |
| MALT1    | -0,19387755  | 5,110341196 | 0,080697877 | 0,108322603 |
| AKIRIN1  | -0,141087468 | 6,638494205 | 0,080794498 | 0,108430955 |
| C1orf123 | -0,155647042 | 5,414643246 | 0,080885185 | 0,108531302 |
| CFDP1    | -0,180704043 | 5,914574031 | 0,081346156 | 0,109128357 |
| EPHA4    | 0,378667825  | 4,952247946 | 0,081471365 | 0,109274831 |
| ZXDB     | -0,167451907 | 4,536899559 | 0,081637958 | 0,109476743 |
| COL4A1   | 0,329973508  | 9,182999093 | 0,082045322 | 0,110001386 |
| SMARCD1  | 0,157620427  | 6,285079444 | 0,082086859 | 0,110035442 |
| CASD1    | -0,17928819  | 5,702042278 | 0,08214415  | 0,110090598 |
| UBR5     | 0,192156569  | 7,070873416 | 0,082299415 | 0,110277011 |
| RNF31    | 0,134516428  | 6,788590358 | 0,082471852 | 0,110486358 |
| IGF1R    | -0,283314556 | 6,634509796 | 0,082552263 | 0,11057236  |
| NARS     | 0,149187792  | 7,514607691 | 0,082671658 | 0,110710534 |
| MT1E     | -0,423969094 | 6,313777744 | 0,08272789  | 0,110764084 |
| BFAR     | 0,192402243  | 7,066290815 | 0,082784938 | 0,110818706 |
| CCND1    | -0,303068648 | 8,770052699 | 0,082868839 | 0,110909247 |



|          |              |             |             |             |
|----------|--------------|-------------|-------------|-------------|
| FAS      | -0,267338753 | 5,591720795 | 0,082922955 | 0,110959896 |
| SUN1     | 0,160139075  | 7,359912899 | 0,082984075 | 0,111019895 |
| CDC42EP4 | -0,225581793 | 6,768862697 | 0,0833851   | 0,111534523 |
| ZNF192   | -0,275854919 | 4,435897336 | 0,083645013 | 0,111860236 |
| ETNK1    | 0,216317013  | 6,882088604 | 0,083996207 | 0,11230787  |
| WIPF2    | -0,159756401 | 6,650860042 | 0,084363836 | 0,112777298 |
| PCK2     | -0,174694108 | 5,912063573 | 0,084469721 | 0,112896713 |
| ZFP36L1  | 0,248871611  | 9,333272516 | 0,084564633 | 0,113001417 |
| CORO7    | -0,13597619  | 6,005209046 | 0,084785263 | 0,113274042 |
| ADRBK1   | 0,153098689  | 7,372751871 | 0,085480716 | 0,114174955 |
| THOC7    | 0,177836208  | 5,876277377 | 0,085493081 | 0,114174955 |
| NMT1     | 0,124268442  | 7,347704014 | 0,085751497 | 0,114497642 |
| EIF3F    | 0,133210475  | 7,879103454 | 0,085790799 | 0,114527694 |
| CORO1A   | 0,263093017  | 6,772318062 | 0,086094911 | 0,114911176 |
| ARSB     | -0,169796918 | 5,230635809 | 0,086223207 | 0,115059892 |
| C3orf37  | 0,142370539  | 6,059821806 | 0,086278503 | 0,115111155 |
| MED4     | -0,120297302 | 5,863402426 | 0,086465459 | 0,115338021 |
| ATP5D    | 0,19516773   | 5,824828808 | 0,086504375 | 0,115367364 |
| PICK1    | -0,161998488 | 4,881493952 | 0,086565179 | 0,115425881 |
| PCNP     | -0,143222479 | 7,591751353 | 0,086583703 | 0,11542801  |
| ARRDC1   | 0,189718553  | 6,111968297 | 0,08668594  | 0,115541717 |
| FAM195B  | 0,19787708   | 6,539339429 | 0,087101764 | 0,116073271 |
| DTX3L    | 0,163040083  | 7,421491059 | 0,087598071 | 0,11671185  |
| ARHGAP5  | -0,176648613 | 7,122879046 | 0,087749499 | 0,116890766 |
| KIAA0368 | -0,151235373 | 7,211697806 | 0,08818788  | 0,117451788 |
| ELOVL1   | 0,172425548  | 7,24782144  | 0,088318374 | 0,117602615 |
| MCM3AP   | -0,130175555 | 6,849350343 | 0,088832732 | 0,118264428 |
| CMPK1    | 0,167835089  | 8,187211679 | 0,08887398  | 0,118296246 |
| NDFIP1   | -0,143475511 | 7,832776033 | 0,090043392 | 0,119829408 |
| EIF4EBP3 | -0,271156419 | 3,18088434  | 0,090463489 | 0,120364981 |
| BRD2     | -0,137068426 | 8,32787308  | 0,090489447 | 0,120376031 |
| ZFP112   | -0,212751592 | 2,440029605 | 0,090553663 | 0,120437962 |
| TMEM185A | 0,129005339  | 4,700079106 | 0,090586891 | 0,12045866  |
| ANXA7    | 0,125593277  | 7,789144691 | 0,091030934 | 0,121025529 |
| ARHGAP27 | -0,205387594 | 6,017393422 | 0,09155048  | 0,121692539 |
| B3GALT6  | 0,185379909  | 5,058582227 | 0,091569601 | 0,121694232 |
| SACS     | 0,299553527  | 4,353230494 | 0,092404367 | 0,122779692 |
| B3GALT4  | -0,189745492 | 4,461065789 | 0,092639837 | 0,123068585 |
| LSMD1    | 0,242658406  | 5,537182847 | 0,092896098 | 0,123384981 |
| MSRB2    | 0,185405823  | 5,152212542 | 0,093183433 | 0,123719897 |
| ANXA11   | -0,163371613 | 8,70131501  | 0,093184542 | 0,123719897 |
| AP3D1    | 0,163928287  | 7,723909197 | 0,093390059 | 0,123968623 |
| SMAP2    | -0,167339185 | 6,615763642 | 0,093823316 | 0,1245195   |
| CCDC88C  | -0,248704747 | 6,095808827 | 0,093945494 | 0,124657389 |
| BMP2K    | -0,179589542 | 4,55506234  | 0,09400831  | 0,124716472 |
| CTBS     | 0,183142122  | 5,610786763 | 0,094363666 | 0,125163555 |
| AP2M1    | 0,160213993  | 8,691311614 | 0,094654904 | 0,125525436 |
| TMED7    | 0,144340152  | 7,4950897   | 0,09481517  | 0,125713522 |
| EPB41L1  | -0,208156105 | 6,653953863 | 0,095271048 | 0,126293405 |
| WAC      | -0,104444415 | 7,514780799 | 0,095676715 | 0,126806515 |

|          |              |             |             |             |
|----------|--------------|-------------|-------------|-------------|
| SQLE     | -0,236978306 | 6,540732344 | 0,096214713 | 0,127494778 |
| INTS3    | -0,171949575 | 6,973718881 | 0,096236823 | 0,1274993   |
| MTFMT    | -0,111618567 | 4,34883206  | 0,096339683 | 0,12761078  |
| MAP3K2   | 0,150064352  | 5,398099168 | 0,096386649 | 0,127648196 |
| ANAPC4   | -0,131828891 | 5,045567654 | 0,096548125 | 0,127837216 |
| CTBP1    | 0,122252974  | 7,44752498  | 0,096609062 | 0,127893068 |
| ITGB1BP1 | 0,168064166  | 6,032411417 | 0,097331656 | 0,128824643 |
| NEURL4   | -0,131631363 | 5,220449477 | 0,097391768 | 0,12887919  |
| RNF213   | 0,239287056  | 8,594225684 | 0,097482519 | 0,128974252 |
| CDCA7L   | 0,277063571  | 5,66919667  | 0,097571848 | 0,129067397 |
| PRKAB1   | -0,193496347 | 6,555572043 | 0,097613599 | 0,129097582 |
| EBAG9    | -0,161817217 | 5,525189198 | 0,097779345 | 0,129291711 |
| HSPG2    | -0,272036957 | 9,013749125 | 0,098318994 | 0,129980074 |
| RBM19    | 0,152802682  | 5,220002783 | 0,098443762 | 0,130119793 |
| IGJ      | 0,488021317  | 10,08906568 | 0,098599642 | 0,130300573 |
| KIF13B   | -0,292238716 | 6,595848303 | 0,098883322 | 0,130642164 |
| HMG4     | 0,185426566  | 6,891186507 | 0,098896444 | 0,130642164 |
| GOLGA2   | 0,17837599   | 6,959882221 | 0,099210361 | 0,131031465 |
| TIGD1    | 0,174361151  | 3,764418347 | 0,09966814  | 0,131610582 |
| IMPDH1   | 0,225978871  | 6,549110186 | 0,099832547 | 0,131797863 |
| WDR41    | -0,145900756 | 5,243703165 | 0,099848623 | 0,131797863 |
| ANKLE2   | 0,152150551  | 6,653010244 | 0,099940282 | 0,13189332  |
| NUCKS1   | 0,157615324  | 8,922114503 | 0,100145999 | 0,132128473 |
| BST2     | 0,275838768  | 7,69121958  | 0,100157219 | 0,132128473 |
| SOS1     | -0,139206925 | 6,235682883 | 0,100391104 | 0,1324114   |
| ALG12    | 0,153887008  | 5,442211296 | 0,100860169 | 0,13300435  |
| MAP4K4   | 0,233370615  | 7,561688791 | 0,100954544 | 0,133088927 |
| GMIP     | -0,15506791  | 5,413130384 | 0,10096334  | 0,133088927 |
| RPAIN    | 0,182228863  | 5,536746116 | 0,101426676 | 0,13367385  |
| UNC5B    | -0,234935882 | 6,041862097 | 0,101448387 | 0,133676628 |
| BSCL2    | 0,18364878   | 6,82400156  | 0,101527853 | 0,133753744 |
| WDR44    | -0,139210364 | 4,923805217 | 0,101546141 | 0,133753744 |
| G3BP2    | 0,13779803   | 7,841354128 | 0,102691323 | 0,135236023 |
| PLEKHA3  | 0,11285898   | 5,014223928 | 0,102770821 | 0,135314584 |
| PARN     | 0,146223908  | 6,328780119 | 0,102796289 | 0,135316792 |
| CBY1     | 0,188600145  | 5,493783199 | 0,102812186 | 0,135316792 |
| SUCLG2   | 0,165479263  | 6,886668035 | 0,103160031 | 0,135748408 |
| API5     | 0,112100716  | 7,294584572 | 0,103415735 | 0,136058634 |
| ZBTB33   | 0,142633529  | 5,710655419 | 0,103561551 | 0,136224193 |
| ZNF542   | -0,241650056 | 4,428012997 | 0,104189362 | 0,13702358  |
| COG4     | 0,111496459  | 6,429151301 | 0,104734099 | 0,137713425 |
| PRR13    | 0,139036618  | 7,714600715 | 0,105272852 | 0,138395138 |
| HBP1     | -0,148453101 | 7,053148326 | 0,105460672 | 0,138615328 |
| UBN2     | -0,168444469 | 5,25808344  | 0,105983039 | 0,13927507  |
| EHHADH   | 0,217144723  | 4,58580637  | 0,106404402 | 0,139801853 |
| VASN     | 0,273469485  | 5,755559134 | 0,106516837 | 0,139922618 |
| C1S      | 0,255365962  | 8,969652729 | 0,106644642 | 0,140063524 |
| VPS37C   | 0,128522034  | 5,749683502 | 0,106703997 | 0,140114492 |
| MT2A     | -0,415984997 | 7,897439509 | 0,106947087 | 0,140406659 |
| KPNA1    | 0,122300645  | 6,633408443 | 0,107293082 | 0,140833788 |

|           |              |             |             |             |
|-----------|--------------|-------------|-------------|-------------|
| KPTN      | 0,193734584  | 3,27602229  | 0,107821604 | 0,141500292 |
| CC2D1B    | -0,124768387 | 6,189953945 | 0,107945273 | 0,141635331 |
| SMG1      | -0,159274776 | 6,967914376 | 0,108012532 | 0,141696318 |
| CCDC12    | -0,141592617 | 5,518672815 | 0,108309615 | 0,142058717 |
| SMARCA4   | 0,238188189  | 7,646198629 | 0,108662137 | 0,142493676 |
| LZTR1     | -0,132373498 | 5,791059357 | 0,108787696 | 0,142630897 |
| EXOC6B    | -0,177058223 | 3,66827223  | 0,108828499 | 0,142656966 |
| MREG      | 0,220770098  | 5,677489837 | 0,109248734 | 0,143180303 |
| IKBKB     | 0,215977682  | 6,401691346 | 0,109410771 | 0,143365112 |
| DAG1      | -0,16442967  | 7,817051909 | 0,110210449 | 0,144385216 |
| C17orf49  | -0,126585198 | 7,325557591 | 0,110360036 | 0,144553417 |
| DNAJC25   | 0,144111796  | 3,823991419 | 0,110590809 | 0,144827872 |
| SLC31A1   | -0,157739029 | 7,006864843 | 0,110819842 | 0,145099943 |
| PML       | 0,201811614  | 7,211764898 | 0,111148989 | 0,145495301 |
| NAPG      | 0,128137911  | 5,828842313 | 0,11116447  | 0,145495301 |
| NRIP1     | 0,222302267  | 6,553676439 | 0,111446922 | 0,145833218 |
| ATP6V1G1  | 0,178731478  | 7,493619642 | 0,111465425 | 0,145833218 |
| SCP2      | -0,149207498 | 7,759229136 | 0,11171276  | 0,146109185 |
| CEP135    | -0,129078287 | 4,048108355 | 0,11171921  | 0,146109185 |
| UBR4      | -0,162354248 | 7,709684728 | 0,111913175 | 0,146334792 |
| RABGGTB   | 0,159433722  | 5,858333265 | 0,11201457  | 0,146429688 |
| PIK3CD    | -0,194346263 | 5,450439045 | 0,112028697 | 0,146429688 |
| FIZ1      | -0,157262405 | 4,450385946 | 0,112376167 | 0,146855708 |
| PIP4K2A   | -0,176627362 | 6,131316925 | 0,112541378 | 0,147043429 |
| HNRNPA3   | 0,131350634  | 8,937759918 | 0,112780385 | 0,14732748  |
| PRPF6     | 0,154051575  | 7,566912192 | 0,112867156 | 0,147412591 |
| SEPT7     | -0,113975156 | 7,925618415 | 0,113093477 | 0,147679896 |
| KIAA1217  | 0,21413909   | 7,040542549 | 0,113123942 | 0,147691396 |
| PATL1     | 0,157068584  | 6,303367173 | 0,113154199 | 0,147702619 |
| IMPAD1    | 0,13288337   | 7,446612888 | 0,113176942 | 0,147704033 |
| OSBPL2    | 0,133392467  | 6,416348808 | 0,11325379  | 0,147776042 |
| IQCB1     | 0,184883711  | 4,890844308 | 0,113429139 | 0,147962622 |
| FAM165B   | -0,19001127  | 4,347509301 | 0,11344018  | 0,147962622 |
| PANK3     | 0,17673646   | 4,862877285 | 0,113832625 | 0,148446103 |
| PSMB10    | 0,233072161  | 6,756878674 | 0,113882281 | 0,148482462 |
| DCUN1D4   | 0,132567328  | 5,412627567 | 0,113916964 | 0,148499289 |
| SLC25A38  | -0,13117617  | 5,609325527 | 0,114049558 | 0,148643719 |
| ARHGEF10L | -0,177125273 | 5,667093968 | 0,114117348 | 0,148692172 |
| MAT2B     | -0,156551212 | 7,079066732 | 0,114130346 | 0,148692172 |
| LPIN1     | -0,207158367 | 5,712851398 | 0,114549992 | 0,14921039  |
| FOXK1     | -0,191461326 | 6,416099399 | 0,114860614 | 0,149586426 |
| DHX36     | 0,12894489   | 5,98965535  | 0,11488368  | 0,149587897 |
| ZNF187    | -0,153883384 | 4,152004324 | 0,115079527 | 0,149814298 |
| ARF3      | 0,14514367   | 8,599190459 | 0,115272395 | 0,150036736 |
| NCLN      | 0,13418235   | 6,780091216 | 0,11534662  | 0,150104694 |
| EIF3L     | -0,143223162 | 8,701322236 | 0,115459037 | 0,150222319 |
| PIM1      | -0,205346407 | 6,400497853 | 0,115551947 | 0,150314522 |
| SSPN      | -0,247953711 | 4,919479788 | 0,116100359 | 0,150999113 |
| PPM1A     | -0,114744321 | 6,583743502 | 0,116334722 | 0,15127507  |
| MED1      | 0,183505284  | 6,433572778 | 0,116617365 | 0,151613691 |

|         |              |             |             |             |
|---------|--------------|-------------|-------------|-------------|
| NUFIP2  | 0,136854063  | 7,313044038 | 0,116769256 | 0,151782226 |
| PCDHB9  | 0,246775153  | 2,868686914 | 0,117076648 | 0,152152785 |
| BMI1    | 0,173945151  | 6,649614551 | 0,1173553   | 0,15248586  |
| FASTKD5 | -0,154588562 | 4,890088542 | 0,117530163 | 0,152683975 |
| MFSK7   | -0,211048489 | 4,294022946 | 0,117604978 | 0,152752066 |
| VAC14   | 0,134815696  | 6,340000504 | 0,117647708 | 0,152778466 |
| NAT14   | 0,216521029  | 4,365995437 | 0,117920484 | 0,153103538 |
| SLC35E1 | -0,120888129 | 7,087475656 | 0,118218253 | 0,15346093  |
| PIGG    | 0,120336227  | 5,514911614 | 0,11841707  | 0,153689761 |
| ALKBH3  | -0,133426926 | 4,428145758 | 0,118451571 | 0,153705283 |
| RHOF    | 0,289139797  | 5,376782378 | 0,118962159 | 0,154338464 |
| XRN2    | 0,14222869   | 7,210861471 | 0,119098663 | 0,154486167 |
| CMTM6   | -0,140574027 | 7,797806888 | 0,119182439 | 0,154565434 |
| SLC40A1 | -0,323741787 | 8,671005309 | 0,119992999 | 0,155587043 |
| CAB39   | -0,127859579 | 7,44501803  | 0,120207009 | 0,155834904 |
| NUAK1   | -0,263007995 | 5,373291973 | 0,120457768 | 0,156130302 |
| ADIPOR1 | 0,125693153  | 8,023625837 | 0,12064425  | 0,156342291 |
| SMEK1   | -0,125897443 | 6,708323485 | 0,120807089 | 0,156523568 |
| GTF2A1  | 0,204390998  | 3,618185797 | 0,120999828 | 0,156743508 |
| IGFBP4  | -0,200019718 | 9,517991287 | 0,121040911 | 0,156766946 |
| HSBP1   | 0,217705574  | 7,676400184 | 0,121268473 | 0,157031849 |
| DNAJC13 | -0,142857151 | 6,271030737 | 0,121654822 | 0,157502227 |
| ZNF81   | 0,17126513   | 2,801321492 | 0,12193039  | 0,15782903  |
| MALAT1  | -0,307393792 | 7,839069788 | 0,122057842 | 0,157964021 |
| RBPMS2  | 0,349243957  | 2,855530859 | 0,123010797 | 0,159167102 |
| POLG    | -0,118828147 | 5,969386686 | 0,123076368 | 0,159213176 |
| CYTH4   | -0,23749157  | 5,123009733 | 0,123093102 | 0,159213176 |
| RICTOR  | -0,144430586 | 6,054261585 | 0,123385737 | 0,159561414 |
| TRIP12  | 0,136860654  | 7,683544604 | 0,123534917 | 0,159724042 |
| PRKAB2  | 0,180309423  | 5,041412321 | 0,123713119 | 0,159924125 |
| MUT     | 0,122837828  | 5,867748661 | 0,123762616 | 0,159957787 |
| CSNK1D  | 0,113306819  | 7,96812148  | 0,124130538 | 0,160402906 |
| VAMP8   | 0,24636313   | 8,402189318 | 0,124305308 | 0,160598313 |
| EXOC5   | -0,129839304 | 6,524904584 | 0,124537805 | 0,160868212 |
| BPTF    | -0,179698575 | 6,72637413  | 0,124635337 | 0,160963705 |
| NSUN3   | 0,141267882  | 3,256207357 | 0,125603506 | 0,162183357 |
| SEMA3F  | -0,236634294 | 5,674044937 | 0,126625058 | 0,163471464 |
| ISY1    | 0,104805725  | 5,370723488 | 0,126683819 | 0,163516366 |
| ABCA11P | 0,154325431  | 3,054853274 | 0,127539434 | 0,164589591 |
| HNRNPM  | -0,133262772 | 7,961556042 | 0,127582744 | 0,16460572  |
| KBTBD7  | -0,200044667 | 3,185216829 | 0,127620132 | 0,16460572  |
| CLOCK   | 0,181014299  | 4,585653057 | 0,127624349 | 0,16460572  |
| BAHCC1  | -0,218882738 | 5,237954468 | 0,12782869  | 0,164838093 |
| PRSS23  | 0,238321847  | 7,692318903 | 0,128617829 | 0,165824348 |
| PLEKHA7 | 0,215293465  | 5,279974595 | 0,128913465 | 0,166171233 |
| GEM     | 0,343492617  | 5,988850971 | 0,12893562  | 0,166171233 |
| TNFAIP2 | 0,329929855  | 7,368026843 | 0,129133805 | 0,166395203 |
| ZFP161  | -0,096436202 | 4,555556376 | 0,129341034 | 0,16663074  |
| SF3B5   | 0,168698786  | 6,609623929 | 0,129758792 | 0,167137364 |
| CETN3   | 0,169806899  | 4,53903973  | 0,130001248 | 0,167418038 |

|          |              |             |             |             |
|----------|--------------|-------------|-------------|-------------|
| CHMP7    | 0,127434761  | 6,119874134 | 0,130088801 | 0,167499157 |
| EPHA2    | -0,30730984  | 6,734100349 | 0,130740701 | 0,168306747 |
| CCDC124  | 0,147027864  | 5,965404838 | 0,130908173 | 0,168490531 |
| DDX31    | 0,114591841  | 4,174551142 | 0,130957454 | 0,168522151 |
| MPDU1    | 0,172425127  | 6,608642203 | 0,131017125 | 0,168567127 |
| RRAS2    | -0,17613285  | 5,746619469 | 0,131438849 | 0,169077818 |
| DNAJC14  | 0,101357979  | 6,61910613  | 0,131483719 | 0,169103636 |
| ZNF397   | -0,198743206 | 4,312730144 | 0,131923383 | 0,169637101 |
| APAF1    | -0,1221478   | 5,339805002 | 0,132022783 | 0,16971069  |
| TSG101   | 0,129173158  | 6,737086756 | 0,132030387 | 0,16971069  |
| PDHA1    | 0,134751865  | 6,239581068 | 0,132073043 | 0,169733525 |
| ZNF776   | -0,145748719 | 4,483032644 | 0,13237792  | 0,17009328  |
| OSBPL10  | 0,169660758  | 5,177352918 | 0,132874894 | 0,17069968  |
| IRS2     | -0,285223291 | 6,342806718 | 0,133135267 | 0,171001956 |
| RPL26    | 0,208865344  | 9,766975178 | 0,133271788 | 0,17114507  |
| ITGA5    | -0,326283961 | 7,789027255 | 0,133485635 | 0,171387413 |
| SEPT11   | -0,197684831 | 7,375575729 | 0,133607134 | 0,171511116 |
| XIAP     | 0,109390644  | 7,080047249 | 0,133741612 | 0,171651431 |
| NUDC     | 0,144732394  | 7,220570296 | 0,134373434 | 0,172429892 |
| NDUFA4L2 | 0,447401397  | 5,605775047 | 0,134529337 | 0,17259747  |
| ZNF652   | -0,157273049 | 6,195318459 | 0,135430513 | 0,173720968 |
| SRCAP    | 0,103720392  | 7,984278007 | 0,136082394 | 0,174524326 |
| RYK      | 0,125350241  | 6,468217048 | 0,13619729  | 0,174638835 |
| MCPH1    | -0,120450942 | 4,839795912 | 0,13662395  | 0,175152982 |
| VPS28    | 0,159553761  | 7,079366572 | 0,136955738 | 0,175545335 |
| ZFP1     | 0,138612217  | 3,819151495 | 0,137320978 | 0,175980408 |
| SEMA3C   | 0,288019038  | 6,448365561 | 0,137417198 | 0,176070626 |
| CCDC106  | -0,15483868  | 3,946109576 | 0,138106725 | 0,176920864 |
| TAF13    | 0,180378646  | 4,12949395  | 0,138410631 | 0,17724505  |
| KIAA0947 | 0,160431609  | 6,157124679 | 0,138411774 | 0,17724505  |
| ADPGK    | -0,132550294 | 6,619097445 | 0,138637089 | 0,177500246 |
| RP9P     | -0,138969016 | 3,679052525 | 0,138927418 | 0,17783857  |
| MFS10    | 0,173233187  | 6,82066249  | 0,139406042 | 0,178417755 |
| CTR9     | -0,124201281 | 6,393172587 | 0,139541686 | 0,178557845 |
| DOCK10   | -0,225906382 | 5,101088537 | 0,140704976 | 0,180012613 |
| GLI2     | 0,283664876  | 2,976015849 | 0,140753432 | 0,180040827 |
| ZNF616   | 0,135315682  | 3,574391988 | 0,140829206 | 0,180103968 |
| GMPT2    | 0,132166103  | 6,498688533 | 0,141211332 | 0,180558798 |
| ACADVL   | -0,140698346 | 8,099623951 | 0,141489919 | 0,180881094 |
| EID2     | -0,147093627 | 4,169780186 | 0,141554816 | 0,180930138 |
| SNAPC3   | 0,130315834  | 5,0868245   | 0,141923541 | 0,181367434 |
| PIM3     | 0,191504973  | 7,298590736 | 0,142040064 | 0,181482331 |
| RPA1     | 0,102341699  | 6,823493302 | 0,142600819 | 0,182164666 |
| ACP2     | 0,132023262  | 6,369902967 | 0,142931574 | 0,182552988 |
| TBK1     | 0,124395671  | 5,530129303 | 0,142981124 | 0,182582076 |
| IDH3A    | -0,127957071 | 6,055284131 | 0,143014512 | 0,182590519 |
| CNPY4    | -0,141113972 | 3,861314801 | 0,143315685 | 0,182940782 |
| ATAD2B   | 0,147903518  | 4,330624046 | 0,143452618 | 0,183067823 |
| SNRNP70  | 0,135405834  | 7,193425244 | 0,143468903 | 0,183067823 |
| PPT2     | -0,187483485 | 4,198950438 | 0,143689788 | 0,183315373 |

|           |              |             |             |             |
|-----------|--------------|-------------|-------------|-------------|
| CUL5      | -0,11265261  | 5,909908147 | 0,143983271 | 0,183655429 |
| PPT1      | -0,160986406 | 8,533139355 | 0,144103459 | 0,183774357 |
| SLC39A9   | 0,106607404  | 7,096099422 | 0,144207705 | 0,183872913 |
| RNF135    | 0,13672495   | 5,310508138 | 0,144400641 | 0,184084496 |
| STX8      | -0,147053559 | 5,04913218  | 0,144517035 | 0,184198442 |
| PKNOX1    | -0,085100554 | 4,891116932 | 0,144707044 | 0,184406155 |
| ALDH9A1   | -0,13471637  | 7,0897065   | 0,145025007 | 0,184776816 |
| DCLRE1B   | 0,13262051   | 4,128273352 | 0,145565551 | 0,185430878 |
| PDGFRA    | -0,24502686  | 6,396484722 | 0,145617613 | 0,185462552 |
| MDC1      | 0,180561885  | 5,892962904 | 0,146029282 | 0,185952133 |
| DDRGK1    | -0,144040679 | 6,303751283 | 0,146242116 | 0,186188385 |
| CHFR      | 0,129337942  | 5,192366497 | 0,146447005 | 0,186414435 |
| PHACTR4   | -0,113167011 | 6,457566955 | 0,146614837 | 0,186593238 |
| SKP1      | 0,151693623  | 8,539572933 | 0,146800742 | 0,186794973 |
| TXNDC15   | -0,140778892 | 6,529767139 | 0,147004769 | 0,186998625 |
| SLC20A2   | 0,21265299   | 6,354004605 | 0,147015637 | 0,186998625 |
| GGA1      | -0,147692431 | 6,217174027 | 0,147099683 | 0,187070634 |
| ZNF551    | 0,150287565  | 3,07926544  | 0,147370279 | 0,187379813 |
| GLS       | 0,320023058  | 8,1725753   | 0,1474106   | 0,18739148  |
| TMEM160   | -0,168164075 | 2,868764048 | 0,147434417 | 0,18739148  |
| SHMT1     | 0,183656042  | 5,638420118 | 0,147473596 | 0,187406346 |
| CLEC2B    | -0,289154196 | 4,973696237 | 0,14798493  | 0,188014739 |
| EIF5B     | 0,159143163  | 7,870270479 | 0,148007496 | 0,188014739 |
| SNX18     | -0,173397495 | 6,153589948 | 0,148080367 | 0,188072271 |
| DNAJC1    | -0,146916588 | 5,797765937 | 0,148976033 | 0,189174594 |
| ACOT9     | -0,113240934 | 5,66028662  | 0,149043678 | 0,189225254 |
| APP       | -0,151247867 | 10,14727154 | 0,149220129 | 0,18941401  |
| ILF3      | 0,121860402  | 8,16967933  | 0,149357221 | 0,189552743 |
| RRN3P2    | -0,115036421 | 2,365330128 | 0,149462992 | 0,189651683 |
| IRF5      | -0,197134027 | 4,919632858 | 0,14953747  | 0,189710886 |
| ZNF614    | 0,224935067  | 4,248799566 | 0,14979508  | 0,190002354 |
| SMCHD1    | -0,145205458 | 6,247627567 | 0,150154608 | 0,190422962 |
| AGAP5     | -0,189699192 | 2,60534934  | 0,150394329 | 0,190691507 |
| DPCD      | 0,175916539  | 4,517155849 | 0,150635609 | 0,19096193  |
| RNF144A   | 0,185040801  | 5,3150052   | 0,151169136 | 0,191588346 |
| BLVRB     | 0,260270742  | 7,11633927  | 0,151185935 | 0,191588346 |
| ROBO1     | -0,230870909 | 5,672548324 | 0,151237493 | 0,191618072 |
| LAMP2     | 0,156593069  | 8,562178618 | 0,151422294 | 0,191816575 |
| CLINT1    | 0,151658393  | 7,435978091 | 0,15187656  | 0,19235629  |
| TP53RK    | 0,143855109  | 5,011415268 | 0,15215368  | 0,192671485 |
| LOC283922 | -0,18873176  | 2,280550458 | 0,152484652 | 0,193054743 |
| C22orf32  | -0,171618834 | 5,857606598 | 0,152551216 | 0,193103164 |
| C20orf112 | 0,176747898  | 5,595230547 | 0,153290049 | 0,194002384 |
| MBD6      | 0,153875028  | 6,397981218 | 0,153573113 | 0,19432456  |
| PLCB3     | 0,149252184  | 5,818894139 | 0,153664707 | 0,194404386 |
| C9orf78   | -0,104731341 | 6,374774717 | 0,15374728  | 0,194472769 |
| NPEPL1    | -0,173317377 | 5,555766581 | 0,154109248 | 0,194894466 |
| ZNF613    | 0,185890822  | 3,073403619 | 0,154146396 | 0,194905298 |
| RPL3      | 0,147994651  | 11,44294193 | 0,15424569  | 0,19499469  |
| UBA3      | 0,136551056  | 6,329613547 | 0,154418237 | 0,195176637 |

|          |              |             |             |             |
|----------|--------------|-------------|-------------|-------------|
| PRKAA1   | 0,138335442  | 7,029648685 | 0,15459513  | 0,195364008 |
| TXN2     | 0,152911407  | 6,586666654 | 0,154882196 | 0,195674493 |
| EXOC4    | 0,104522783  | 6,707059091 | 0,154898213 | 0,195674493 |
| VPS16    | 0,100134794  | 5,705908467 | 0,155324566 | 0,196176739 |
| EFTUD1   | -0,115238625 | 4,951452564 | 0,155586998 | 0,196471804 |
| DOCK7    | 0,151631035  | 5,451013729 | 0,155754463 | 0,196646859 |
| SMC1A    | 0,163294263  | 7,23121867  | 0,155967317 | 0,196879143 |
| ATP5O    | 0,182712203  | 7,281886686 | 0,156364895 | 0,197344478 |
| POLR2C   | 0,159420885  | 7,141958337 | 0,156534821 | 0,197522381 |
| FOXJ3    | -0,117163718 | 6,473279534 | 0,156686823 | 0,197677603 |
| RNF10    | -0,097430616 | 7,830421594 | 0,156733311 | 0,197699676 |
| C19orf43 | -0,123107921 | 6,826507828 | 0,157071211 | 0,198089253 |
| PLS3     | 0,235677032  | 9,274854037 | 0,157167501 | 0,198174037 |
| DDX59    | 0,121506161  | 4,685636001 | 0,157458391 | 0,198504117 |
| DECR1    | -0,133939412 | 6,229261336 | 0,157998233 | 0,199147866 |
| ZNF713   | -0,168932657 | 2,628199699 | 0,158153806 | 0,199270199 |
| SPTLC2   | -0,15205367  | 6,635224977 | 0,158167739 | 0,199270199 |
| CEP70    | 0,154061806  | 5,194053387 | 0,158182958 | 0,199270199 |
| ATG2A    | 0,141596418  | 5,944698275 | 0,159220669 | 0,200516074 |
| NDUFB1   | 0,195027018  | 5,80193793  | 0,159230758 | 0,200516074 |
| NUDT15   | 0,145567563  | 5,028946791 | 0,15933048  | 0,200604605 |
| NPC2     | -0,265199041 | 9,981447517 | 0,159534667 | 0,200824607 |
| MIPEP    | -0,136947118 | 4,620534098 | 0,159565072 | 0,200825807 |
| CCDC6    | 0,142790116  | 7,371107832 | 0,160005026 | 0,201342364 |
| FOXN2    | -0,138373459 | 5,355326529 | 0,160332249 | 0,201716902 |
| CTSB     | 0,209974323  | 11,21130129 | 0,160555284 | 0,201960243 |
| SNHG8    | 0,215357784  | 5,549637785 | 0,160716746 | 0,202126059 |
| GTF2H5   | 0,149185101  | 5,480376191 | 0,160900698 | 0,202320092 |
| ATF4     | -0,141692568 | 8,602440067 | 0,161001058 | 0,202408963 |
| MYL12B   | -0,168743194 | 9,428524253 | 0,16130387  | 0,202752275 |
| PTDSS2   | 0,135205594  | 5,095629344 | 0,161452352 | 0,202901509 |
| GNA13    | -0,124414028 | 7,048532141 | 0,161810436 | 0,203314053 |
| EFHD2    | 0,192626246  | 7,430719387 | 0,162201825 | 0,203768284 |
| ZNF276   | -0,140912106 | 4,885956132 | 0,162562283 | 0,204183497 |
| ZFAND1   | 0,17997206   | 5,712115992 | 0,163645393 | 0,205506065 |
| CHRAC1   | 0,116312278  | 5,888386493 | 0,163907716 | 0,205797591 |
| C12orf29 | 0,163168793  | 4,724755039 | 0,165623573 | 0,207913686 |
| AMMECR1L | 0,096798267  | 5,552222778 | 0,165839635 | 0,20812181  |
| CGN      | -0,259652727 | 7,78506569  | 0,165850406 | 0,20812181  |
| PTPRF    | 0,151506226  | 9,18224059  | 0,165991793 | 0,208260908 |
| ARFGEF2  | 0,139408062  | 6,532209948 | 0,16682255  | 0,20926471  |
| DYRK1B   | -0,163250517 | 5,006029136 | 0,166997656 | 0,209445837 |
| PICALM   | -0,097873649 | 8,11920457  | 0,167223748 | 0,209690831 |
| RPS20    | 0,168705451  | 10,17765763 | 0,167327542 | 0,209776966 |
| RNF170   | 0,119179038  | 5,444340475 | 0,167381383 | 0,209776966 |
| DHX35    | 0,122782186  | 4,115101375 | 0,16738473  | 0,209776966 |
| SCAMP1   | 0,110923705  | 6,500806035 | 0,168165931 | 0,210717289 |
| BRD3     | -0,138012525 | 5,85113555  | 0,169006691 | 0,211695221 |
| QRSL1    | 0,108922747  | 4,735355184 | 0,169008473 | 0,211695221 |
| NDUFS4   | 0,157336509  | 5,616695585 | 0,169088601 | 0,211756688 |

|          |              |             |             |             |
|----------|--------------|-------------|-------------|-------------|
| STT3B    | 0,12641861   | 7,15555941  | 0,169647472 | 0,212417575 |
| P4HA2    | 0,190276292  | 6,899998769 | 0,169764116 | 0,212524601 |
| LAMB1    | -0,220988976 | 7,676329422 | 0,169855179 | 0,212599572 |
| CHMP2A   | 0,127729642  | 7,150934434 | 0,170224362 | 0,213022559 |
| GBP2     | 0,223469168  | 7,278202649 | 0,170300879 | 0,21307921  |
| CYBA     | 0,208372105  | 7,843028785 | 0,170770974 | 0,213628191 |
| MED9     | 0,116761304  | 4,560480379 | 0,170855558 | 0,2136948   |
| SETD1A   | 0,131265686  | 5,735239753 | 0,171329116 | 0,214247798 |
| FRG1     | -0,101833775 | 5,406453123 | 0,171821082 | 0,214823608 |
| HMG2     | 0,148474827  | 9,279695444 | 0,171917486 | 0,214904736 |
| ZNF414   | -0,123150818 | 3,396578521 | 0,172065309 | 0,215012475 |
| MFS11    | 0,098316373  | 5,670716289 | 0,172066737 | 0,215012475 |
| WBP5     | -0,149689869 | 6,248766807 | 0,172167954 | 0,215099538 |
| IFNAR1   | -0,103589573 | 7,140173302 | 0,172470194 | 0,215437672 |
| SERPINE1 | -0,339673773 | 7,678801795 | 0,172690033 | 0,215672772 |
| FTSD1    | -0,131623756 | 5,403625515 | 0,17314973  | 0,216202019 |
| TAOK1    | -0,169302606 | 4,841798933 | 0,173177215 | 0,216202019 |
| UBE2D4   | 0,138954129  | 4,158073203 | 0,17358493  | 0,21667136  |
| ZNF462   | -0,251560722 | 4,384416523 | 0,173652152 | 0,216715597 |
| GPAM     | 0,238878296  | 4,954030238 | 0,173803411 | 0,216864677 |
| LTBP3    | -0,186645402 | 7,793656981 | 0,173842692 | 0,216874006 |
| PREP     | -0,113606947 | 5,711762334 | 0,173901773 | 0,216904032 |
| CSAD     | -0,19853461  | 4,158679541 | 0,173930378 | 0,216904032 |
| MANEA    | 0,142402739  | 5,024957889 | 0,174296574 | 0,217320962 |
| ADAP2    | 0,20119464   | 4,719125307 | 0,174660283 | 0,217734638 |
| NEK4     | 0,098194482  | 4,933351034 | 0,175689867 | 0,218978103 |
| ARID2    | -0,133237983 | 5,343386179 | 0,17604125  | 0,219375966 |
| RNF169   | -0,142722597 | 5,017310377 | 0,17654569  | 0,219964382 |
| CSRP2BP  | 0,107544609  | 5,204218841 | 0,176630977 | 0,220030441 |
| TCIRG1   | -0,144074234 | 7,088812381 | 0,17680739  | 0,220209971 |
| RASA2    | -0,159544724 | 3,298230734 | 0,176892495 | 0,220216191 |
| NUBP1    | 0,110205114  | 5,195454843 | 0,176911215 | 0,220216191 |
| RIOK2    | -0,091191878 | 4,944332404 | 0,176929807 | 0,220216191 |
| MYO1D    | 0,196819258  | 7,760581065 | 0,176941562 | 0,220216191 |
| SLC7A5P2 | -0,131456775 | 1,737748854 | 0,177232989 | 0,220538641 |
| BRD7     | -0,100169066 | 6,423951987 | 0,17816099  | 0,221652945 |
| CWC22    | -0,073635087 | 5,346640163 | 0,178229079 | 0,221697207 |
| OS9      | 0,152601565  | 9,17597881  | 0,178430696 | 0,221907517 |
| BAZ1B    | 0,134997528  | 7,131325789 | 0,178547343 | 0,222012095 |
| RARRES3  | 0,332770863  | 7,254032603 | 0,178831194 | 0,222324506 |
| SSU72    | 0,110159898  | 7,548640214 | 0,17891472  | 0,222387801 |
| HUWE1    | 0,169729465  | 8,515144419 | 0,179537638 | 0,223121405 |
| LSM3     | 0,13292404   | 5,643349311 | 0,179768765 | 0,223357214 |
| ECSIT    | -0,12258003  | 5,195658696 | 0,179792894 | 0,223357214 |
| TRIM23   | -0,12424209  | 4,420765591 | 0,179898566 | 0,223447782 |
| MAPK14   | 0,104519789  | 6,805992935 | 0,18009533  | 0,22365144  |
| DPY19L3  | -0,149818752 | 4,616800186 | 0,180827822 | 0,224520197 |
| ECH1     | 0,177858264  | 7,727522527 | 0,180940025 | 0,224618611 |
| TNPO2    | -0,11821349  | 6,424588888 | 0,180992321 | 0,224642635 |
| POGK     | -0,10622344  | 6,889050658 | 0,181299233 | 0,224982615 |



|          |              |             |             |             |
|----------|--------------|-------------|-------------|-------------|
| HIBCH    | 0,134733328  | 4,993351037 | 0,181727702 | 0,22547329  |
| ZNF765   | -0,09519489  | 4,183925247 | 0,181799368 | 0,225521173 |
| HSF2     | -0,118018433 | 4,313513008 | 0,182424728 | 0,22625577  |
| MPZL3    | 0,216574344  | 2,885209494 | 0,182619228 | 0,226455813 |
| RUFY1    | -0,1123792   | 6,207495773 | 0,182927483 | 0,226763347 |
| CHMP5    | 0,149205561  | 7,321959837 | 0,18293374  | 0,226763347 |
| ZNF417   | -0,125992844 | 4,105928538 | 0,183962909 | 0,227997651 |
| DNAJA1   | -0,117552975 | 7,892220293 | 0,18404592  | 0,228059082 |
| IPO13    | 0,0978171    | 5,657113047 | 0,18555316  | 0,229884992 |
| SELK     | 0,169901413  | 5,969237895 | 0,185824197 | 0,230178964 |
| OPN3     | 0,262291772  | 6,008048534 | 0,186121035 | 0,230504784 |
| RAB18    | 0,110892402  | 7,018414705 | 0,186426323 | 0,230840947 |
| CCNB1IP1 | 0,203709343  | 5,662165238 | 0,186688333 | 0,23112341  |
| ZNF574   | 0,130361733  | 4,843396683 | 0,18726212  | 0,231791685 |
| NUP50    | 0,111278892  | 6,382914901 | 0,187333678 | 0,231838176 |
| ERMP1    | -0,173527962 | 6,044548047 | 0,187542751 | 0,232054803 |
| PRCP     | -0,143429979 | 7,266049486 | 0,187733408 | 0,232248568 |
| ATP8B2   | -0,170979778 | 5,84396887  | 0,187808805 | 0,232299699 |
| MYC      | -0,251800134 | 6,75250635  | 0,188055812 | 0,232563036 |
| TMEM50B  | -0,17686483  | 6,690201769 | 0,188694748 | 0,233310877 |
| SPARC    | 0,207569159  | 10,8514462  | 0,188791727 | 0,233388467 |
| OGG1     | 0,128498254  | 4,301573127 | 0,18919891  | 0,233849296 |
| PTPRK    | -0,160233098 | 7,016233162 | 0,189264899 | 0,233849296 |
| ALG13    | 0,132035897  | 5,143999066 | 0,189298988 | 0,233849296 |
| WEE1     | 0,19741362   | 5,918999279 | 0,189306223 | 0,233849296 |
| MAK16    | 0,118654283  | 4,830365105 | 0,189335967 | 0,233849296 |
| COL6A2   | 0,240163355  | 9,257422716 | 0,190065087 | 0,234707322 |
| HS6ST1   | 0,173947146  | 6,3813442   | 0,190599527 | 0,235324674 |
| SNX11    | 0,130419694  | 5,451102602 | 0,191104514 | 0,235905446 |
| PARP4    | -0,135452982 | 7,40708151  | 0,191539428 | 0,236399523 |
| C9orf91  | -0,142530207 | 5,176743203 | 0,191981413 | 0,236902145 |
| ZC3H11A  | 0,124285271  | 7,711110747 | 0,192273362 | 0,237219478 |
| DDX60L   | -0,173251304 | 5,371552112 | 0,192385893 | 0,237267829 |
| GABPB2   | 0,143403585  | 2,731583506 | 0,1923936   | 0,237267829 |
| DDX6     | -0,09066242  | 7,759375911 | 0,192416937 | 0,237267829 |
| ASAP2    | -0,226270637 | 5,646200033 | 0,192580499 | 0,237426581 |
| GLE1     | 0,093284747  | 5,858031837 | 0,193152841 | 0,238089158 |
| M6PR     | -0,128460877 | 7,432660711 | 0,193363695 | 0,238305989 |
| ASXL2    | -0,169298979 | 5,411596243 | 0,193968859 | 0,239008611 |
| DYM      | 0,108083318  | 5,34971996  | 0,194529449 | 0,239656063 |
| NF2      | -0,12392533  | 6,186096131 | 0,195039003 | 0,240218822 |
| BCR      | 0,148941003  | 7,343088511 | 0,195056697 | 0,240218822 |
| ZC3H18   | 0,105061442  | 5,958388347 | 0,195216737 | 0,240351277 |
| C11orf54 | -0,18359474  | 5,823476432 | 0,195265455 | 0,240351277 |
| USP48    | 0,104216856  | 6,190056126 | 0,195269992 | 0,240351277 |
| CLCC1    | -0,092663422 | 5,752940284 | 0,197150454 | 0,242622081 |
| ZNF428   | 0,172014635  | 4,969475368 | 0,197371953 | 0,242850838 |
| ZNF224   | -0,143566466 | 3,221728835 | 0,197918483 | 0,243479368 |
| ATP6V0C  | -0,109503314 | 7,395800899 | 0,198415625 | 0,244046924 |
| ITGB1    | 0,132450116  | 10,12208424 | 0,199176108 | 0,244938121 |

|           |              |             |             |             |
|-----------|--------------|-------------|-------------|-------------|
| MTOR      | 0,129233318  | 6,479265813 | 0,199426934 | 0,245202355 |
| TBCCD1    | 0,107485723  | 4,512801576 | 0,199477116 | 0,24521984  |
| THAP1     | 0,114588935  | 4,020421353 | 0,199820525 | 0,245597722 |
| DPY19L4   | 0,107062926  | 6,055987055 | 0,199874617 | 0,245619934 |
| ARIH1     | -0,092083933 | 6,734523031 | 0,200060514 | 0,24580408  |
| ERF       | -0,12263498  | 5,767464665 | 0,200185808 | 0,245913714 |
| MSL1      | 0,108641516  | 6,701738111 | 0,20073044  | 0,246538341 |
| UBA1      | 0,106648422  | 8,804145299 | 0,200865717 | 0,246660062 |
| ADH5      | -0,138122337 | 7,775282477 | 0,201423894 | 0,24730096  |
| RELB      | 0,188830182  | 5,332023047 | 0,202056014 | 0,248016579 |
| ZCCHC11   | -0,133569299 | 5,367251294 | 0,202079501 | 0,248016579 |
| TDP2      | 0,156345495  | 6,225180988 | 0,203156633 | 0,249293698 |
| CMTM8     | -0,150017828 | 4,518622255 | 0,203289449 | 0,249411794 |
| ATG10     | 0,11667912   | 3,612086158 | 0,20360619  | 0,249755461 |
| BLOC1S2   | -0,128905493 | 5,898154144 | 0,204178032 | 0,25041187  |
| DZIP1     | -0,181615477 | 4,223116062 | 0,20459255  | 0,250875131 |
| CHST11    | -0,20376611  | 4,682701831 | 0,205003318 | 0,251333626 |
| C3orf38   | 0,133876991  | 5,04204765  | 0,20520466  | 0,251524954 |
| SLC41A3   | 0,11007485   | 5,931372278 | 0,205233149 | 0,251524954 |
| C15orf61  | 0,157373403  | 2,92783102  | 0,206039863 | 0,252468253 |
| SERP1     | -0,114006634 | 8,490744253 | 0,206259926 | 0,252692496 |
| ANKH      | 0,154818605  | 6,459390295 | 0,206572201 | 0,25302961  |
| LOC253039 | -0,148145762 | 4,812372956 | 0,206738994 | 0,253188433 |
| STARD3NL  | -0,166731665 | 6,311279479 | 0,207644294 | 0,254251471 |
| MGST3     | -0,145815102 | 6,928427799 | 0,207751025 | 0,254336488 |
| CEP97     | 0,167093613  | 3,107479401 | 0,208066585 | 0,254677086 |
| TP53INP1  | -0,180956363 | 6,729335698 | 0,208873437 | 0,255618803 |
| SUSD1     | -0,129103109 | 5,064018106 | 0,21007274  | 0,257040376 |
| HELZ      | -0,11763671  | 6,29417163  | 0,210383489 | 0,25736536  |
| SMC3      | 0,12958227   | 6,492021222 | 0,210413826 | 0,25736536  |
| CARHSP1   | 0,14487813   | 6,793291674 | 0,211669615 | 0,258854933 |
| DNAJB6    | 0,105755401  | 7,467527759 | 0,211890209 | 0,259078238 |
| TTC1      | 0,108999831  | 6,169773374 | 0,212113792 | 0,259305118 |
| RAB3GAP1  | -0,090678832 | 6,593491227 | 0,214136058 | 0,261730378 |
| SRRM1     | -0,089410221 | 6,916310706 | 0,214489651 | 0,262115579 |
| PPP1CB    | 0,101370544  | 8,912851534 | 0,214786938 | 0,262431846 |
| PHRF1     | -0,119730196 | 6,077668202 | 0,215073332 | 0,262734692 |
| SLC16A4   | 0,328896895  | 5,758992332 | 0,215288607 | 0,262950566 |
| ZNF664    | -0,12471034  | 7,764341591 | 0,215406584 | 0,263047546 |
| NAMPT     | 0,285815267  | 9,218808296 | 0,215810031 | 0,263493035 |
| IDS       | -0,155072979 | 8,424967279 | 0,21669045  | 0,264520619 |
| CEBPZ     | 0,090596641  | 6,485046876 | 0,217164225 | 0,265051521 |
| SS18      | -0,121967733 | 6,804063394 | 0,217754213 | 0,265724048 |
| COL4A2    | -0,224219354 | 9,372674528 | 0,218119209 | 0,266121826 |
| NDUFAF3   | -0,121080588 | 6,152314511 | 0,218199844 | 0,266172583 |
| TMEM127   | -0,086923523 | 7,327647487 | 0,218881432 | 0,266956266 |
| CCNK      | 0,095867487  | 6,231120285 | 0,219301156 | 0,267420348 |
| DNAJA2    | 0,092224523  | 6,840059713 | 0,219607626 | 0,267746183 |
| ZNF740    | -0,105608174 | 5,466998279 | 0,219902749 | 0,26805807  |
| SSBP3     | -0,131437024 | 5,629106285 | 0,219978076 | 0,268101966 |

|          |              |             |             |             |
|----------|--------------|-------------|-------------|-------------|
| BRWD1    | -0,115018609 | 6,052213525 | 0,221217069 | 0,26956383  |
| EGFR     | 0,296491643  | 6,715368678 | 0,221580735 | 0,269958734 |
| LGALS9   | -0,190463489 | 7,270133636 | 0,221814112 | 0,270194789 |
| C3orf52  | -0,169637026 | 4,286989194 | 0,221957213 | 0,270320814 |
| RPL11    | -0,122142108 | 10,02604232 | 0,222792684 | 0,271289877 |
| HSDL1    | 0,132375529  | 5,411538352 | 0,222998077 | 0,271491499 |
| F2R      | -0,169848426 | 6,398772885 | 0,223644261 | 0,272229599 |
| PTPN3    | -0,143387584 | 5,808540063 | 0,224198134 | 0,272855091 |
| GTF3C4   | 0,132322042  | 4,866134899 | 0,22493793  | 0,273706592 |
| EXOC2    | -0,095385594 | 5,718140585 | 0,225011865 | 0,273747709 |
| ZNF277   | 0,137564487  | 5,502562096 | 0,226051805 | 0,274963835 |
| SIPA1L3  | 0,14905235   | 6,646088622 | 0,226344375 | 0,275270607 |
| PLCG1    | -0,153041325 | 6,384170144 | 0,22656701  | 0,275492233 |
| LRCH3    | -0,139297453 | 4,297141001 | 0,22697667  | 0,275941151 |
| RPL22    | 0,100299997  | 9,358844871 | 0,227300836 | 0,27628599  |
| KIAA1430 | -0,095310845 | 6,084558371 | 0,227487419 | 0,276463502 |
| TRIP11   | -0,120679443 | 5,618734165 | 0,227984532 | 0,277018268 |
| FUT10    | 0,144482812  | 3,303423481 | 0,228902793 | 0,278084473 |
| PANK2    | -0,083497069 | 4,932736023 | 0,229188548 | 0,278382028 |
| PIK3C3   | -0,112675007 | 5,19670014  | 0,229483288 | 0,27869039  |
| HTATSF1  | 0,115010652  | 6,665379348 | 0,229848464 | 0,279084166 |
| CCDC7    | 0,146818358  | 1,033126095 | 0,230132676 | 0,279379512 |
| RBAK     | 0,133219013  | 4,753749507 | 0,230176045 | 0,279382422 |
| HCFC1    | 0,132957425  | 7,120905583 | 0,230290626 | 0,279471753 |
| ASB7     | -0,077338423 | 4,688656744 | 0,230893083 | 0,280153013 |
| SHISA5   | 0,099151963  | 8,030728465 | 0,231756584 | 0,281150711 |
| AP3S2    | 0,104728102  | 6,607937073 | 0,232041625 | 0,281446432 |
| CLDND1   | 0,141989949  | 6,643734708 | 0,232161271 | 0,281541473 |
| ITFG1    | 0,103932516  | 6,598499059 | 0,232501144 | 0,281903503 |
| PBX2     | -0,126870893 | 7,057328201 | 0,23257553  | 0,281943563 |
| FKBP9    | -0,127003009 | 7,696072721 | 0,235079607 | 0,284928518 |
| VPS4A    | -0,075132546 | 6,989608939 | 0,235274542 | 0,28511411  |
| ANXA1    | -0,263736287 | 9,345210072 | 0,235324893 | 0,285124457 |
| GSPT1    | -0,081736927 | 7,912981339 | 0,235473125 | 0,285253374 |
| ZNF789   | -0,11562422  | 2,45378017  | 0,235599093 | 0,285355278 |
| TXLNG    | -0,13154258  | 3,729984109 | 0,235848114 | 0,28560616  |
| RBM14    | 0,073738516  | 5,934582366 | 0,236143216 | 0,285912746 |
| ZNF638   | -0,100096138 | 6,856185701 | 0,236323974 | 0,286080806 |
| KDM3B    | -0,103241699 | 7,070666088 | 0,237149046 | 0,287028638 |
| USP24    | -0,103068828 | 6,503555973 | 0,237783457 | 0,287745412 |
| MKKS     | 0,111040457  | 5,666763175 | 0,238020413 | 0,287981049 |
| IFFO2    | -0,164646551 | 5,372428634 | 0,238265839 | 0,288226851 |
| PPTC7    | -0,132706836 | 5,512396308 | 0,238491718 | 0,288448923 |
| SOCS7    | -0,162976566 | 2,437304766 | 0,238624507 | 0,288558347 |
| CEP57    | 0,097431657  | 5,832160981 | 0,23914749  | 0,289139492 |
| BOK      | -0,179281873 | 6,499449076 | 0,239202722 | 0,289155001 |
| MYO10    | -0,1666466   | 7,134945928 | 0,239483283 | 0,28944284  |
| CYB5B    | 0,150940985  | 7,06490627  | 0,23989628  | 0,289890614 |
| GOLGA7   | 0,135496115  | 6,471199725 | 0,240151134 | 0,290147162 |
| COMMD8   | 0,161812347  | 4,916791786 | 0,240380238 | 0,290372514 |

|            |              |             |             |             |
|------------|--------------|-------------|-------------|-------------|
| RPL23AP82  | 0,097154217  | 4,274478693 | 0,240514574 | 0,290483329 |
| CAPZB      | 0,088317912  | 8,408292413 | 0,241559752 | 0,291693988 |
| HECTD1     | -0,125982635 | 7,62290172  | 0,241863394 | 0,292008938 |
| SELT       | 0,170143206  | 7,828562458 | 0,242240432 | 0,292412375 |
| PPIG       | -0,08417201  | 6,286197933 | 0,242799715 | 0,293035621 |
| SPATA7     | -0,11829164  | 3,593632255 | 0,243571391 | 0,293914938 |
| POM121C    | 0,1166981    | 6,531574785 | 0,243740048 | 0,294066416 |
| SNX27      | 0,120640109  | 6,435896528 | 0,243871485 | 0,294172945 |
| GPBP1L1    | -0,07367996  | 7,521524871 | 0,244662973 | 0,295075489 |
| SFMBT2     | -0,170676112 | 2,966859643 | 0,244771568 | 0,295154257 |
| CDC42EP3   | 0,174174236  | 6,421130858 | 0,24509542  | 0,295492516 |
| CHUK       | 0,095144669  | 5,549385425 | 0,245381187 | 0,295784747 |
| UBA5       | -0,078736004 | 5,684075242 | 0,246205047 | 0,296725383 |
| VASP       | -0,119247074 | 7,600924651 | 0,246841669 | 0,297440068 |
| KCTD3      | -0,166212574 | 6,060836469 | 0,248008841 | 0,29879369  |
| DCAF10     | -0,0888696   | 5,896382993 | 0,250608725 | 0,301872619 |
| C5orf44    | 0,121627046  | 5,194799953 | 0,250999576 | 0,302290023 |
| TRA2A      | -0,086567401 | 6,553541091 | 0,251177052 | 0,302450347 |
| SERPINB1   | 0,206149358  | 8,097668379 | 0,251564986 | 0,302863991 |
| MMAA       | -0,093049087 | 3,938901813 | 0,251877194 | 0,303184652 |
| CHD1       | -0,115691381 | 5,767507499 | 0,251920258 | 0,303184652 |
| VTI1A      | 0,070456419  | 4,840044107 | 0,251992914 | 0,303185428 |
| AKAP10     | -0,098633382 | 4,961463595 | 0,252009826 | 0,303185428 |
| MPST       | 0,157934005  | 6,549901849 | 0,252257068 | 0,303429343 |
| ZCCHC8     | 0,079683338  | 5,114515556 | 0,253448652 | 0,304808882 |
| POLD3      | 0,097947588  | 5,050057627 | 0,253659506 | 0,304986307 |
| OSBPL5     | -0,168712436 | 5,372107836 | 0,253685633 | 0,304986307 |
| UBXN7      | 0,158772302  | 4,418012016 | 0,256390961 | 0,308184376 |
| KEAP1      | 0,11404456   | 6,57347213  | 0,257002702 | 0,308865249 |
| TAF6L      | 0,087745698  | 4,076719839 | 0,259385609 | 0,311647869 |
| DNAJC3     | 0,112253495  | 7,534928391 | 0,259409489 | 0,311647869 |
| PDLIM5     | 0,138192515  | 7,041805943 | 0,261223978 | 0,313772469 |
| ANP32A     | -0,080810746 | 7,35757402  | 0,261296096 | 0,313803818 |
| NSD1       | -0,125564169 | 6,621163643 | 0,261462157 | 0,313947957 |
| URM1       | 0,101113641  | 6,168595436 | 0,262263902 | 0,314855202 |
| NARS2      | 0,126301181  | 4,991209155 | 0,262992487 | 0,315601211 |
| GPBP1      | -0,073734053 | 6,890652852 | 0,263029286 | 0,315601211 |
| ST6GALNAC4 | -0,156334748 | 5,857877086 | 0,263039744 | 0,315601211 |
| RBX1       | 0,159803598  | 6,441128131 | 0,263070433 | 0,315601211 |
| ZNF586     | -0,112897798 | 3,470284054 | 0,263306584 | 0,315828953 |
| METAP2     | -0,080821486 | 7,032058753 | 0,26344283  | 0,315936802 |
| CLN6       | 0,111417191  | 5,850611253 | 0,263890225 | 0,316417698 |
| ARHGEF11   | -0,119023905 | 6,538207491 | 0,264609614 | 0,3172245   |
| TROVE2     | 0,077188594  | 6,209529948 | 0,265329629 | 0,31803177  |
| SPPL2A     | 0,11237929   | 6,115988359 | 0,266942374 | 0,31990862  |
| CARKD      | -0,102541005 | 5,808129179 | 0,268109053 | 0,32125033  |
| ZNF335     | 0,099524761  | 5,068606926 | 0,268301357 | 0,321424271 |
| PDE7A      | -0,114618834 | 5,228666521 | 0,268371841 | 0,321452236 |
| GSDMD      | 0,131981946  | 6,861843072 | 0,268635301 | 0,321711295 |
| CDK19      | -0,101679634 | 5,315895302 | 0,26868281  | 0,321711691 |

|          |              |             |             |             |
|----------|--------------|-------------|-------------|-------------|
| LPIN3    | 0,13385892   | 4,585012965 | 0,268929524 | 0,321950565 |
| AP4S1    | 0,12075984   | 3,073742329 | 0,268994839 | 0,321972232 |
| AP1B1    | 0,093940002  | 7,6134112   | 0,26943214  | 0,322439059 |
| C5orf42  | 0,144958976  | 5,053698958 | 0,269781155 | 0,322800087 |
| FAM117B  | 0,112376674  | 4,957292127 | 0,270414425 | 0,323501046 |
| CEP192   | -0,113201717 | 4,973284415 | 0,271527512 | 0,324775671 |
| CENPB    | -0,096440687 | 7,110287209 | 0,272555354 | 0,325947905 |
| HBS1L    | 0,092357515  | 5,860078495 | 0,272669879 | 0,326027688 |
| ACIN1    | -0,095962867 | 7,360128502 | 0,273704282 | 0,327177739 |
| CDK18    | -0,132734751 | 5,50861959  | 0,273727673 | 0,327177739 |
| PACRGL   | 0,109484772  | 3,957541536 | 0,273852972 | 0,327253701 |
| QARS     | 0,084711439  | 7,796115369 | 0,273887208 | 0,327253701 |
| FHOD1    | -0,145231404 | 6,268173489 | 0,276614552 | 0,33045456  |
| TNRC18   | 0,151795182  | 7,844716543 | 0,277378592 | 0,331309269 |
| NDRG3    | 0,072500965  | 6,107558583 | 0,277709095 | 0,33164594  |
| SH2D4A   | 0,163270443  | 5,822811387 | 0,277791081 | 0,331685761 |
| NGRN     | -0,089986349 | 7,029920173 | 0,278213456 | 0,332131925 |
| SBF1     | 0,123210067  | 6,698396269 | 0,278269194 | 0,332140317 |
| ARPC4    | 0,103576836  | 8,084716201 | 0,278563733 | 0,332433689 |
| GNL1     | -0,083218007 | 6,373501896 | 0,278928694 | 0,332810983 |
| AMIGO3   | 0,157443776  | 2,523978265 | 0,279713032 | 0,333688447 |
| MBIP     | -0,197613549 | 7,004901099 | 0,279890369 | 0,333841599 |
| MED15    | -0,102786196 | 7,091276009 | 0,280456868 | 0,334413793 |
| RAC2     | -0,150449954 | 6,846645537 | 0,280468174 | 0,334413793 |
| VAPB     | 0,096131963  | 6,11283097  | 0,280610553 | 0,334525063 |
| CASP8AP2 | -0,105954642 | 4,539015963 | 0,280720354 | 0,334597464 |
| CAMK1D   | 0,17077349   | 4,35048208  | 0,280889339 | 0,334740371 |
| TP53BP1  | 0,115354954  | 5,951630539 | 0,280969155 | 0,334776982 |
| KIAA0284 | 0,143162762  | 6,529948969 | 0,281691624 | 0,335579173 |
| ZFAND6   | 0,114975933  | 6,852118947 | 0,281977301 | 0,335860823 |
| RAB11A   | -0,103948791 | 7,712658596 | 0,283126593 | 0,337170841 |
| SLC43A3  | 0,171106382  | 7,43280499  | 0,283309405 | 0,337329637 |
| GOPC     | -0,079409798 | 5,787389888 | 0,283611312 | 0,337630157 |
| ACTR2    | 0,071160234  | 8,911919947 | 0,284929867 | 0,339140647 |
| NAB1     | -0,094338367 | 5,895207358 | 0,28751938  | 0,342163116 |
| PRPF39   | 0,102093831  | 4,774162022 | 0,287888621 | 0,342542751 |
| CXCR4    | 0,169459986  | 6,949737091 | 0,288134502 | 0,342775501 |
| PRR14    | 0,083610231  | 5,446710787 | 0,288373373 | 0,34296346  |
| USP42    | 0,109700475  | 4,616775242 | 0,28839309  | 0,34296346  |
| WDR61    | 0,122736001  | 5,926239567 | 0,288616698 | 0,343169532 |
| ACTA2    | -0,171739728 | 8,288739276 | 0,289229699 | 0,343838445 |
| R3HDM2   | -0,100428492 | 6,517931603 | 0,289432501 | 0,344019562 |
| ZNF461   | 0,120293183  | 3,179402785 | 0,289511489 | 0,344053476 |
| FNBP4    | -0,107711795 | 5,999269403 | 0,290355561 | 0,34499644  |
| STIM2    | -0,129929925 | 5,594718208 | 0,290484309 | 0,345089286 |
| LAMC1    | 0,148080496  | 8,455493474 | 0,291194501 | 0,345872723 |
| OXR1     | 0,109355383  | 6,180614264 | 0,291556355 | 0,346242213 |
| LRRCC1   | -0,106745663 | 4,8893824   | 0,29271449  | 0,347557044 |
| LRRC58   | -0,10231811  | 6,204604682 | 0,292844872 | 0,34765132  |
| ASB8     | -0,064495867 | 5,523295308 | 0,292933793 | 0,34769635  |

|          |              |             |             |             |
|----------|--------------|-------------|-------------|-------------|
| CD300A   | 0,187749477  | 4,740440826 | 0,293569278 | 0,348389995 |
| CYTH2    | -0,081008501 | 6,590553817 | 0,293849747 | 0,348662159 |
| EXOC7    | 0,071730414  | 7,535209095 | 0,294086072 | 0,348829493 |
| GPR183   | 0,209839096  | 5,045815497 | 0,294093086 | 0,348829493 |
| NID1     | 0,200135233  | 7,025694238 | 0,294413804 | 0,34914917  |
| ELMOD3   | 0,102477015  | 4,287791567 | 0,294477991 | 0,349164566 |
| DHRS7B   | -0,123911139 | 5,290336309 | 0,294946085 | 0,349658789 |
| STUB1    | 0,086228706  | 6,793520051 | 0,295038201 | 0,349662077 |
| RAB5C    | 0,080766427  | 8,045716412 | 0,295087938 | 0,349662077 |
| DGCR14   | 0,086071862  | 4,619821423 | 0,295102692 | 0,349662077 |
| XRCC1    | 0,096888357  | 5,574089262 | 0,295887586 | 0,350531176 |
| DENND4B  | -0,103979877 | 6,126520027 | 0,296760035 | 0,351503678 |
| GCC1     | -0,091623075 | 5,423454028 | 0,297194325 | 0,351956947 |
| NHLRC2   | 0,121549408  | 3,412436092 | 0,298244041 | 0,353138759 |
| RBM27    | 0,070709355  | 5,834533759 | 0,298635962 | 0,353541428 |
| CDK5RAP2 | -0,124933907 | 6,334345607 | 0,30028078  | 0,355426946 |
| RPS12    | 0,131230599  | 10,13937578 | 0,300689081 | 0,355848463 |
| IL15RA   | -0,136876524 | 4,913642014 | 0,302609606 | 0,358021183 |
| TTC3     | 0,107014033  | 7,764954756 | 0,302630019 | 0,358021183 |
| SGTA     | 0,071190382  | 6,545681792 | 0,30278151  | 0,358138268 |
| EYA3     | -0,103612497 | 3,158001421 | 0,303174002 | 0,358540326 |
| SHB      | -0,124129757 | 5,803939402 | 0,303505141 | 0,3588697   |
| PURB     | -0,097873022 | 6,779359536 | 0,304062301 | 0,359466163 |
| RNF103   | 0,099903053  | 5,9514071   | 0,304231093 | 0,359603367 |
| PANK4    | -0,069774274 | 4,735949486 | 0,304979255 | 0,360425223 |
| SMYD2    | -0,096643672 | 5,990307061 | 0,305327133 | 0,360773821 |
| BBS9     | -0,111035988 | 4,513991691 | 0,305848177 | 0,361326875 |
| HDAC10   | 0,100936705  | 5,066186166 | 0,306005813 | 0,361450483 |
| SLC46A1  | -0,111062473 | 5,41689489  | 0,306549997 | 0,361943194 |
| KDM5A    | -0,099629014 | 6,489284143 | 0,30655648  | 0,361943194 |
| RSC1A1   | 0,106162051  | 3,659892688 | 0,30658218  | 0,361943194 |
| IBTK     | 0,088599853  | 6,566977771 | 0,306804313 | 0,36214274  |
| MRPL46   | 0,101786093  | 4,555111388 | 0,30760731  | 0,363008005 |
| DCTN3    | -0,098767302 | 5,84300987  | 0,307643828 | 0,363008005 |
| ASL      | 0,136965777  | 6,370813617 | 0,307802989 | 0,363107386 |
| GNB2     | 0,084726882  | 8,220032095 | 0,30783455  | 0,363107386 |
| DDHD2    | 0,190259569  | 6,097251386 | 0,30933299  | 0,364766195 |
| KDM2A    | 0,098554655  | 7,652191618 | 0,309347838 | 0,364766195 |
| ABL2     | -0,103838591 | 6,029053066 | 0,309431269 | 0,364801491 |
| KITLG    | -0,166707195 | 7,137024832 | 0,310150546 | 0,36558627  |
| GGNBP2   | -0,057244479 | 6,43314691  | 0,31024691  | 0,365636654 |
| MAP2K1   | 0,086775027  | 6,678538169 | 0,3111934   | 0,366688749 |
| PRDX5    | -0,126082147 | 8,687789022 | 0,311304063 | 0,36671945  |
| LILRB4   | 0,239811532  | 5,61344023  | 0,311327012 | 0,36671945  |
| ARHGEF5  | -0,118469337 | 6,439267393 | 0,311499305 | 0,366859026 |
| DDX51    | -0,099934645 | 5,073440519 | 0,312486387 | 0,367957982 |
| GATSL3   | 0,125143104  | 4,436775182 | 0,312671262 | 0,368112109 |
| PTPN4    | -0,092674928 | 4,185368933 | 0,31326894  | 0,368702464 |
| PHAX     | -0,070837509 | 4,715148915 | 0,313280844 | 0,368702464 |
| ZNF430   | -0,093369707 | 3,374661525 | 0,313933736 | 0,3694071   |

|          |              |             |             |             |
|----------|--------------|-------------|-------------|-------------|
| SNTB1    | -0,144122507 | 6,723898108 | 0,315208793 | 0,370806994 |
| SCPEP1   | -0,160958631 | 7,943129411 | 0,315232167 | 0,370806994 |
| RNF216   | 0,080708491  | 6,382375048 | 0,31542969  | 0,370975346 |
| DNAJC16  | -0,066699352 | 5,309047006 | 0,315764356 | 0,371304904 |
| RAI1     | 0,124295208  | 6,138714589 | 0,316186202 | 0,371736847 |
| ATP6V0E1 | 0,124695032  | 8,273849813 | 0,316361743 | 0,371879111 |
| LGALS3   | -0,163175899 | 9,318178775 | 0,316829367 | 0,372364608 |
| DOCK1    | -0,119732808 | 6,649866342 | 0,317223396 | 0,372713481 |
| CHST3    | 0,223844096  | 5,436522124 | 0,317235525 | 0,372713481 |
| ZNF558   | 0,106060724  | 4,265566526 | 0,317924399 | 0,37345848  |
| PHTF1    | -0,082323437 | 4,635922681 | 0,319671942 | 0,37542427  |
| CBX5     | 0,123694559  | 7,343751149 | 0,319707983 | 0,37542427  |
| SLC25A32 | 0,07965767   | 5,552131879 | 0,319830536 | 0,375503517 |
| ACADM    | -0,103054757 | 6,156271862 | 0,320087987 | 0,375741089 |
| ABL1     | -0,104753153 | 6,883008677 | 0,32022319  | 0,375818312 |
| C11orf57 | 0,071027984  | 5,768766278 | 0,320263999 | 0,375818312 |
| BCAS2    | 0,090841485  | 5,312724209 | 0,320950796 | 0,376526506 |
| MSL3     | -0,072477119 | 5,338526163 | 0,320977941 | 0,376526506 |
| EHBP1L1  | -0,106698386 | 6,67259987  | 0,321501725 | 0,377076069 |
| SPTY2D1  | 0,0712159    | 5,983547675 | 0,321671335 | 0,377210118 |
| VPS18    | -0,097532032 | 5,893382946 | 0,321980183 | 0,377507371 |
| NSUN4    | 0,068389879  | 5,305300491 | 0,324474614 | 0,38036658  |
| WDR5B    | 0,0960557    | 4,205243657 | 0,324853399 | 0,380745158 |
| ZNF14    | -0,109889356 | 3,653284232 | 0,325409103 | 0,381330928 |
| EPS15L1  | -0,075310922 | 5,509018796 | 0,32659616  | 0,382656222 |
| PTP4A1   | 0,136558638  | 8,896041708 | 0,327488434 | 0,383587333 |
| RAPH1    | 0,122210331  | 7,115956847 | 0,327503366 | 0,383587333 |
| ZNF688   | -0,111834684 | 3,959216084 | 0,327766023 | 0,383829042 |
| IRF9     | 0,106203359  | 6,087555452 | 0,328306169 | 0,384395565 |
| RNASEH2C | 0,10187527   | 5,304452081 | 0,328964402 | 0,38510013  |
| DDX60    | -0,145398671 | 6,074353379 | 0,329351131 | 0,385486674 |
| GTF3C1   | 0,097400895  | 7,064290717 | 0,330611836 | 0,386882781 |
| CAP2     | -0,13889073  | 3,714630082 | 0,330657406 | 0,386882781 |
| ST6GAL1  | 0,145900439  | 7,51167874  | 0,331652107 | 0,387980051 |
| RAB23    | -0,10984693  | 4,795461513 | 0,332148766 | 0,388494414 |
| KLHDC10  | 0,113426584  | 5,478899753 | 0,332809806 | 0,389200835 |
| TATDN3   | 0,08159008   | 4,886403195 | 0,333896244 | 0,390404405 |
| CLCN3    | 0,103090548  | 6,177818986 | 0,334177785 | 0,390666606 |
| ATP9A    | 0,140853713  | 7,06962819  | 0,334597296 | 0,391089983 |
| ARL5B    | 0,145830179  | 4,549917268 | 0,334705177 | 0,391149033 |
| LRRC47   | 0,062645357  | 6,216143361 | 0,334806822 | 0,391200775 |
| SMAD3    | -0,110162625 | 6,676890104 | 0,335016099 | 0,391378238 |
| TMEM59   | 0,116444001  | 9,025857212 | 0,335709776 | 0,392121439 |
| CSNK1G2  | 0,07520283   | 6,149671245 | 0,336667371 | 0,393172598 |
| TBC1D23  | 0,079178756  | 5,900423695 | 0,336725438 | 0,393173076 |
| HADH     | 0,122825315  | 6,286835022 | 0,338464213 | 0,395135673 |
| EIF2C1   | -0,093482789 | 5,834364402 | 0,339611089 | 0,396406713 |
| FNDC3A   | -0,092412928 | 6,955587367 | 0,340501268 | 0,397377742 |
| CDK10    | 0,11117704   | 5,637574334 | 0,340630183 | 0,397460167 |
| PLD3     | -0,125072339 | 9,345409353 | 0,340857521 | 0,397657389 |

|          |              |             |             |             |
|----------|--------------|-------------|-------------|-------------|
| SSBP4    | -0,098686262 | 5,496892839 | 0,341097372 | 0,397869138 |
| REPS1    | -0,090192936 | 5,456725261 | 0,342699508 | 0,399669565 |
| TGFBR1   | -0,08894624  | 6,58850869  | 0,343134628 | 0,400057141 |
| PLA2R1   | -0,129538554 | 3,343212122 | 0,343174705 | 0,400057141 |
| ECE1     | 0,131197735  | 8,24695086  | 0,343207842 | 0,400057141 |
| TFPI     | -0,215543759 | 8,345956616 | 0,343638323 | 0,400490467 |
| KIAA0922 | -0,127527287 | 5,037733006 | 0,34428189  | 0,401171943 |
| PARP3    | -0,098107453 | 5,216602897 | 0,345318067 | 0,402310593 |
| BTRC     | -0,07376146  | 5,073609571 | 0,345702718 | 0,402689927 |
| TWSG1    | -0,09679602  | 6,429879242 | 0,345840576 | 0,402781706 |
| PIGK     | -0,084146858 | 5,822207111 | 0,347307279 | 0,404371876 |
| PHKB     | -0,091541538 | 7,002974895 | 0,347324546 | 0,404371876 |
| TOM1     | -0,08459975  | 6,750407934 | 0,349170247 | 0,406451334 |
| CCDC111  | -0,084079514 | 3,683245535 | 0,349290754 | 0,406522214 |
| LRP5     | 0,118999832  | 7,451642148 | 0,350817734 | 0,408229715 |
| ATXN7L3B | 0,086002282  | 7,553678026 | 0,351525048 | 0,40898299  |
| ANKRD17  | -0,088367448 | 7,096187173 | 0,352270823 | 0,409780747 |
| FAM32A   | -0,073061381 | 6,688735604 | 0,352706721 | 0,410217829 |
| PPP3R1   | 0,060282664  | 6,885336008 | 0,352906973 | 0,410380738 |
| LAT      | 0,173384764  | 3,777874028 | 0,354603721 | 0,412283508 |
| FMOD     | 0,177873016  | 6,927194749 | 0,354735005 | 0,412365837 |
| NIPBL    | -0,10104289  | 6,79121798  | 0,356074551 | 0,413852457 |
| TMEM55A  | -0,117770493 | 3,643609316 | 0,356243025 | 0,413977707 |
| POLR3F   | 0,083442823  | 4,107150712 | 0,357214648 | 0,415017102 |
| APPL2    | -0,095826922 | 5,733888522 | 0,357266041 | 0,415017102 |
| THADA    | -0,061210718 | 5,965397202 | 0,357353433 | 0,415017102 |
| AMBRA1   | -0,070105091 | 5,832964866 | 0,35738091  | 0,415017102 |
| EPC2     | -0,07101123  | 5,434320678 | 0,357699653 | 0,415316523 |
| MEAF6    | 0,08813758   | 6,662506573 | 0,358743212 | 0,416457263 |
| USP31    | -0,095956402 | 4,635342753 | 0,359334286 | 0,417072424 |
| CTDSPL2  | 0,073385019  | 5,457021469 | 0,359437042 | 0,417120692 |
| LRBA     | 0,101443616  | 7,008447761 | 0,35966699  | 0,417316523 |
| NAP1L1   | 0,07702768   | 8,97667156  | 0,360409677 | 0,418107109 |
| RAD17    | 0,067768623  | 5,238166598 | 0,360488606 | 0,41812754  |
| DBNDD2   | -0,104413536 | 5,820104673 | 0,361066014 | 0,418726045 |
| HERPUD1  | 0,103521114  | 7,853006389 | 0,362239786 | 0,420015831 |
| RNF168   | -0,129538306 | 3,603688196 | 0,363543912 | 0,421456296 |
| CPNE3    | -0,073344145 | 7,662609047 | 0,36394894  | 0,421746388 |
| EFHA1    | -0,086991644 | 5,871454004 | 0,363963139 | 0,421746388 |
| IL8      | 0,302149335  | 6,565793693 | 0,363988977 | 0,421746388 |
| CTSC     | -0,123943334 | 9,112043427 | 0,364041537 | 0,421746388 |
| IFIH1    | 0,115394416  | 5,754717761 | 0,364132358 | 0,421750602 |
| BLOC1S1  | 0,123588388  | 6,505630556 | 0,364168873 | 0,421750602 |
| PRKACB   | 0,161878792  | 6,26318444  | 0,364471433 | 0,422029326 |
| PDDC1    | -0,080735959 | 6,228017509 | 0,364989378 | 0,422557312 |
| DDX19B   | 0,063842105  | 5,672705418 | 0,365857077 | 0,423489969 |
| USP36    | -0,083986315 | 6,182573981 | 0,36666846  | 0,424303928 |
| IQCE     | -0,117788013 | 5,595457966 | 0,366684711 | 0,424303928 |
| GDI1     | 0,090516114  | 7,446563786 | 0,367474037 | 0,42514514  |
| SNX17    | -0,075807854 | 7,611004982 | 0,367952492 | 0,425626471 |



|           |              |             |             |             |
|-----------|--------------|-------------|-------------|-------------|
| PSEN1     | -0,061597291 | 7,130902042 | 0,368123855 | 0,42575247  |
| SMCR7L    | -0,064082028 | 5,936620853 | 0,368337603 | 0,42592744  |
| SENP3     | 0,066062704  | 5,769788215 | 0,368803442 | 0,426393807 |
| CITED4    | -0,186523645 | 3,416215476 | 0,369802122 | 0,427475956 |
| RBM39     | -0,063916231 | 7,680762118 | 0,370395984 | 0,428089867 |
| PRKCI     | -0,095308138 | 6,692288682 | 0,37085208  | 0,428538995 |
| CCDC57    | 0,123192232  | 5,246719201 | 0,370910273 | 0,428538995 |
| PELI1     | -0,125205599 | 6,628608582 | 0,371135243 | 0,428726278 |
| RPL15     | 0,11314958   | 10,56737611 | 0,371316274 | 0,428862749 |
| AFG3L2    | -0,073775675 | 6,320296666 | 0,372060222 | 0,429649222 |
| ANKRD16   | 0,065461189  | 3,550233933 | 0,372694981 | 0,430309359 |
| POR       | -0,100081762 | 7,7709583   | 0,373293979 | 0,430927991 |
| ATP6V1H   | -0,064113453 | 6,312443809 | 0,373754844 | 0,431386981 |
| PRKRIR    | -0,091836723 | 6,458009307 | 0,374015098 | 0,431614309 |
| GGA3      | -0,07436205  | 5,977207043 | 0,37417137  | 0,431721586 |
| RBCK1     | 0,084895297  | 7,013926825 | 0,374630051 | 0,432142437 |
| SLC25A46  | -0,086235995 | 5,385290492 | 0,374662866 | 0,432142437 |
| PIK3CB    | 0,097669503  | 5,972423604 | 0,375226963 | 0,432719881 |
| NBR1      | -0,071448541 | 7,90230838  | 0,375365723 | 0,432806707 |
| TMEM181   | 0,109214912  | 6,412392872 | 0,377184302 | 0,434830051 |
| COG7      | 0,072453672  | 5,287260503 | 0,377753736 | 0,435412902 |
| ABCD3     | -0,095477133 | 6,74780087  | 0,378641562 | 0,436362483 |
| RAB1B     | -0,056045684 | 8,503485115 | 0,378977376 | 0,436675689 |
| ORAI2     | 0,087817229  | 6,540747552 | 0,379436571 | 0,437130931 |
| KIAA0319L | -0,097896908 | 7,528152184 | 0,379731506 | 0,437396814 |
| RALGAPB   | -0,077281832 | 6,660631584 | 0,381128223 | 0,43893149  |
| ARL6IP5   | -0,110371286 | 8,412193007 | 0,38143831  | 0,439214427 |
| USE1      | 0,082989469  | 4,727639608 | 0,381925409 | 0,439701057 |
| ARHGDIB   | -0,121837087 | 8,556791118 | 0,382441796 | 0,440221237 |
| GPR137B   | -0,110098963 | 5,05378283  | 0,38329237  | 0,441125852 |
| TTC30B    | -0,105756904 | 3,754193662 | 0,383635953 | 0,441446771 |
| RPS28     | 0,100939826  | 8,929494663 | 0,384903642 | 0,442830764 |
| HNRNPUL1  | 0,071610923  | 8,621872765 | 0,385357926 | 0,443278626 |
| SETD1B    | -0,087866944 | 5,76522159  | 0,385457827 | 0,443318759 |
| LEMD3     | -0,091834336 | 5,656451274 | 0,385661747 | 0,443478492 |
| PVRIG     | 0,139898682  | 2,354171192 | 0,385853717 | 0,44359798  |
| TASP1     | -0,078557278 | 3,912175579 | 0,385895765 | 0,44359798  |
| LAPTM4A   | -0,076837334 | 9,054692341 | 0,386225715 | 0,443902436 |
| SHROOM1   | 0,112387276  | 4,600004581 | 0,387547355 | 0,44534638  |
| TPP2      | -0,073166421 | 5,986186779 | 0,387657108 | 0,445397442 |
| PUM1      | 0,058939097  | 7,149489489 | 0,388971216 | 0,446831995 |
| CWC27     | 0,068999136  | 4,931479219 | 0,389237232 | 0,447062268 |
| ZFP91     | -0,062537097 | 6,908549133 | 0,390800444 | 0,44878212  |
| GCFC1     | -0,071990549 | 5,001230071 | 0,391039552 | 0,448981092 |
| IFT52     | 0,090458076  | 5,464983381 | 0,392417328 | 0,450487165 |
| ELL2      | -0,111376041 | 7,076404987 | 0,393266298 | 0,451385774 |
| SF3A2     | 0,08600982   | 6,153732944 | 0,393607097 | 0,451700907 |
| METTL3    | 0,086656166  | 5,279871356 | 0,393980389 | 0,452053217 |
| PTPN2     | 0,071009373  | 5,643856577 | 0,394169943 | 0,452194623 |
| ZNF639    | 0,075699403  | 5,341932266 | 0,394804888 | 0,452846852 |

|           |              |             |             |             |
|-----------|--------------|-------------|-------------|-------------|
| EXTL3     | 0,09712076   | 6,109812518 | 0,395268407 | 0,453302265 |
| SENP2     | 0,084525308  | 5,748087675 | 0,398495383 | 0,456926184 |
| PLEKHO1   | -0,123498088 | 6,238257221 | 0,398727348 | 0,457115297 |
| SNAP29    | -0,058768498 | 6,008404207 | 0,399547748 | 0,457978835 |
| ARL5A     | -0,073443744 | 6,430065574 | 0,400185065 | 0,45856573  |
| MAD1L1    | 0,08842392   | 5,33297163  | 0,40019426  | 0,45856573  |
| ZNF460    | -0,114875284 | 1,751812685 | 0,400557321 | 0,458904633 |
| DIP2B     | 0,090267389  | 6,252260093 | 0,401053026 | 0,45936155  |
| ZNF697    | -0,107218745 | 3,341316915 | 0,401090873 | 0,45936155  |
| UBN1      | -0,075507826 | 6,509035313 | 0,401503358 | 0,459756742 |
| HEXDC     | 0,116803267  | 4,641643371 | 0,401665053 | 0,459864674 |
| CHMP1B    | 0,091259864  | 7,364003466 | 0,402126503 | 0,4603157   |
| CETN2     | -0,10604868  | 6,738910971 | 0,40369386  | 0,462032297 |
| LOC440944 | 0,123731009  | 4,035919759 | 0,40391873  | 0,462204667 |
| KIN       | 0,062380312  | 3,892347165 | 0,403980029 | 0,462204667 |
| CST3      | -0,12080635  | 8,976818712 | 0,40480969  | 0,463076208 |
| SMURF2    | 0,110610335  | 5,988976513 | 0,404935953 | 0,463142949 |
| SMURF1    | 0,103945325  | 6,765541445 | 0,405936944 | 0,464209964 |
| ODF2      | 0,086647763  | 5,712279211 | 0,406648092 | 0,4649007   |
| ELMO2     | -0,064516494 | 6,046143587 | 0,406677325 | 0,4649007   |
| C6orf226  | -0,097890118 | 2,566011805 | 0,407622557 | 0,465903154 |
| DYNC1I2   | 0,050748568  | 7,367593536 | 0,408124421 | 0,466398596 |
| WDFY1     | -0,062184064 | 6,455230366 | 0,40825118  | 0,466465281 |
| LSM6      | -0,074846073 | 4,410535306 | 0,409218862 | 0,467492615 |
| QSOX1     | 0,116819176  | 9,218339624 | 0,409340647 | 0,467553412 |
| RREB1     | -0,086709632 | 6,322539552 | 0,410090061 | 0,468330954 |
| DGCR8     | -0,068059284 | 5,413368504 | 0,410534105 | 0,468759555 |
| SAP18     | -0,077288587 | 7,384039939 | 0,411136038 | 0,469368264 |
| ACO1      | 0,11436332   | 6,799362177 | 0,411984475 | 0,470258142 |
| CHST14    | -0,072691508 | 5,126517217 | 0,412135148 | 0,470314444 |
| TTL5      | -0,079517121 | 5,168988391 | 0,412171743 | 0,470314444 |
| COPS7A    | 0,080777432  | 6,693141021 | 0,41413728  | 0,47240569  |
| WDR11     | -0,06189897  | 6,243667549 | 0,414143015 | 0,47240569  |
| CLK3      | -0,074737601 | 5,733589451 | 0,414709783 | 0,472905277 |
| SLC25A19  | 0,085440939  | 4,522464336 | 0,414719689 | 0,472905277 |
| TLK2      | 0,059461844  | 5,973233385 | 0,415549196 | 0,473771939 |
| TTC31     | 0,056652605  | 4,946805529 | 0,416020386 | 0,474229859 |
| ICK       | 0,081584379  | 5,536390508 | 0,417477208 | 0,475810978 |
| ACTR10    | 0,0721091    | 6,437860013 | 0,417860834 | 0,476168621 |
| ACD       | 0,075517765  | 4,404322908 | 0,418280512 | 0,476495611 |
| PNPLA4    | 0,10215253   | 4,850421845 | 0,418287538 | 0,476495611 |
| TERF1     | -0,046654646 | 5,386276417 | 0,419853293 | 0,478199366 |
| CD164     | 0,084589414  | 9,044291204 | 0,420205564 | 0,478520665 |
| JOSD1     | -0,068949341 | 6,983805378 | 0,420884453 | 0,479213739 |
| TNFAIP8   | 0,116850411  | 5,292358771 | 0,421846485 | 0,480228911 |
| TMEM120B  | 0,101034674  | 6,212531866 | 0,421982508 | 0,480250744 |
| PIBF1     | 0,078405315  | 4,802659657 | 0,42200652  | 0,480250744 |
| RABAC1    | 0,091565192  | 6,977011295 | 0,42213393  | 0,48031558  |
| LANCL2    | 0,090512336  | 4,915310399 | 0,423777797 | 0,482105572 |
| NCK1      | 0,093846172  | 5,605614634 | 0,424288919 | 0,482606529 |

|           |              |             |             |             |
|-----------|--------------|-------------|-------------|-------------|
| ASH2L     | 0,10032661   | 6,15286106  | 0,424792151 | 0,483078168 |
| PRKD2     | -0,071105956 | 6,276538633 | 0,424845252 | 0,483078168 |
| PROSC     | -0,099852065 | 6,358981833 | 0,426030098 | 0,484344654 |
| EBPL      | 0,100988829  | 5,444829026 | 0,426881939 | 0,485232196 |
| CROT      | -0,092354456 | 4,376530296 | 0,427156243 | 0,48546307  |
| LGALS8    | 0,075230464  | 6,232294998 | 0,427232193 | 0,485468476 |
| RAB3D     | 0,102788977  | 6,163217941 | 0,428331236 | 0,486636238 |
| C16orf72  | -0,049315692 | 6,171486705 | 0,429110542 | 0,487411812 |
| MRFAP1L1  | -0,06237507  | 6,457918163 | 0,429156844 | 0,487411812 |
| MPHOSPH6  | 0,07744064   | 4,420902508 | 0,430088007 | 0,48838803  |
| NUDT21    | 0,056537351  | 7,004614092 | 0,430309449 | 0,488558131 |
| LOC401397 | 0,09503063   | 5,922145935 | 0,430965699 | 0,489221758 |
| ZNF782    | -0,083814701 | 1,679582904 | 0,431223632 | 0,48943308  |
| ATP6AP2   | 0,058245935  | 8,018386557 | 0,431449672 | 0,48960814  |
| KIAA0100  | -0,074066148 | 8,093218355 | 0,432167013 | 0,490340576 |
| TRAM2     | -0,093961101 | 6,169802742 | 0,432779801 | 0,490954161 |
| RPS6KA3   | -0,081397317 | 7,459796911 | 0,435165314 | 0,493578222 |
| CRLF3     | 0,068938862  | 5,133698962 | 0,435462886 | 0,493833597 |
| EXOSC9    | 0,059548693  | 4,884491891 | 0,435928756 | 0,494279712 |
| RNPC3     | -0,100518065 | 3,492189132 | 0,436579281 | 0,494935016 |
| SAP30BP   | 0,059817643  | 6,209985989 | 0,436812137 | 0,495116682 |
| MRPL14    | 0,116323318  | 6,995359306 | 0,438915018 | 0,497417568 |
| DDA1      | -0,063198737 | 5,870098568 | 0,439124839 | 0,497572662 |
| EDIL3     | -0,190105424 | 5,627023401 | 0,4404091   | 0,49894495  |
| ELK3      | 0,116037783  | 5,610345412 | 0,441181119 | 0,499736554 |
| CPNE8     | 0,102618683  | 4,864712802 | 0,441521699 | 0,500039273 |
| RBM15B    | -0,06138784  | 6,724605875 | 0,442400576 | 0,500951433 |
| NCOA2     | 0,120413322  | 5,525184778 | 0,44318955  | 0,501761505 |
| MYO18A    | -0,093039627 | 6,84591889  | 0,443463953 | 0,501928284 |
| ETFB      | 0,091066241  | 6,493113388 | 0,443484076 | 0,501928284 |
| INPP4A    | -0,065896569 | 5,680908543 | 0,443866335 | 0,502277554 |
| MMGT1     | -0,068594744 | 6,172315278 | 0,445881011 | 0,504473637 |
| FAM46C    | -0,129075064 | 6,468785303 | 0,446897227 | 0,505539514 |
| PEX12     | 0,065587569  | 3,773351378 | 0,447834694 | 0,506515969 |
| GLOD4     | 0,060604601  | 6,301972805 | 0,449073447 | 0,507832809 |
| PPDPF     | 0,111655149  | 8,384219554 | 0,451148334 | 0,510094592 |
| GALNT11   | -0,079644008 | 6,355899633 | 0,453144002 | 0,512266073 |
| CUL1      | -0,047054544 | 6,600732355 | 0,453918256 | 0,513056289 |
| CCDC130   | -0,068407863 | 4,374797943 | 0,454023289 | 0,513074185 |
| CC2D1A    | 0,063616434  | 5,832442223 | 0,454084573 | 0,513074185 |
| PGRMC2    | 0,060281059  | 6,660614216 | 0,454466976 | 0,513421191 |
| UQCRB     | 0,078656993  | 7,720899467 | 0,455366777 | 0,514352501 |
| ARPC5     | -0,082794909 | 8,603512835 | 0,455872543 | 0,514838501 |
| SH3BP4    | 0,100217158  | 6,599540524 | 0,456161786 | 0,515003916 |
| NECAB3    | -0,104077675 | 5,790572699 | 0,456170062 | 0,515003916 |
| GALNS     | 0,087485087  | 5,192723298 | 0,456969129 | 0,515820641 |
| TRA2B     | -0,043261809 | 7,226738146 | 0,457203183 | 0,515999421 |
| WDR1      | 0,057416971  | 8,835503896 | 0,45877014  | 0,517598526 |
| SH3BGRL3  | 0,108910188  | 8,51075152  | 0,458807822 | 0,517598526 |
| IER5      | -0,111819495 | 6,362313828 | 0,458847792 | 0,517598526 |

|            |              |             |             |             |
|------------|--------------|-------------|-------------|-------------|
| ATG5       | 0,073617377  | 5,924294724 | 0,459265439 | 0,517983962 |
| TERF2      | 0,054450615  | 5,263437813 | 0,459564627 | 0,518235686 |
| UBE2Q2     | 0,086663099  | 6,180290505 | 0,459790651 | 0,518269045 |
| XPO7       | 0,063020315  | 6,70951672  | 0,459801578 | 0,518269045 |
| SART3      | 0,060065024  | 6,205247301 | 0,459822221 | 0,518269045 |
| AFTPH      | 0,057410985  | 6,522717678 | 0,460547189 | 0,518959035 |
| CD3G       | 0,13219804   | 2,705854681 | 0,460586608 | 0,518959035 |
| LARS       | 0,05881749   | 7,027076961 | 0,46071129  | 0,51901376  |
| H2AFV      | 0,058703429  | 8,015139479 | 0,461357895 | 0,51965634  |
| ZBTB37     | 0,081491575  | 0,867080171 | 0,462761058 | 0,521150727 |
| TMBIM6     | -0,057391498 | 10,72982314 | 0,463132666 | 0,521483099 |
| ELOVL5     | -0,064680889 | 7,529234606 | 0,464307879 | 0,522720064 |
| TXLNA      | 0,055233768  | 6,998813382 | 0,465298487 | 0,523748825 |
| HOOK3      | -0,078255399 | 6,760751491 | 0,465922131 | 0,524364253 |
| TNIP1      | -0,062524657 | 7,868325489 | 0,466039585 | 0,524409889 |
| JARID2     | 0,089440296  | 5,09103834  | 0,46650801  | 0,524837354 |
| MYO6       | 0,084470765  | 7,628188665 | 0,466573404 | 0,524837354 |
| ZKSCAN1    | -0,087717525 | 5,443673735 | 0,46665965  | 0,52484779  |
| ARL3       | -0,072935534 | 5,396186338 | 0,467157565 | 0,525321147 |
| RARS2      | 0,070369459  | 5,612781063 | 0,467491093 | 0,525609524 |
| ANKRD36BP1 | 0,107207273  | 2,943685004 | 0,468542675 | 0,526704995 |
| TRIM26     | -0,057513926 | 6,586226334 | 0,469225958 | 0,527320096 |
| SEPT8      | -0,065741073 | 6,117990254 | 0,469244514 | 0,527320096 |
| USP15      | -0,055004508 | 6,090882464 | 0,46953641  | 0,527561177 |
| C9orf3     | 0,111445716  | 5,781348199 | 0,469895182 | 0,527877306 |
| ZNF841     | 0,093768417  | 3,977759771 | 0,471291428 | 0,529358631 |
| SKAP2      | -0,090395059 | 6,733809029 | 0,474358934 | 0,532716333 |
| NOL9       | 0,070162883  | 3,904227633 | 0,475262227 | 0,533642866 |
| KLF5       | -0,113732111 | 7,346497248 | 0,475484295 | 0,533804315 |
| ZFAND2B    | 0,060906655  | 5,031330246 | 0,47638914  | 0,534732106 |
| NSMAF      | -0,052801601 | 5,502135411 | 0,476757205 | 0,535057173 |
| TMEM133    | -0,099443422 | 3,409940301 | 0,477035749 | 0,535281681 |
| NBN        | 0,070550619  | 6,508729304 | 0,478638113 | 0,536991328 |
| SPPL2B     | 0,055466584  | 6,073958396 | 0,481877165 | 0,540536337 |
| WDR26      | 0,044520558  | 7,579295212 | 0,482457168 | 0,541097933 |
| CD99L2     | -0,092713505 | 6,841363883 | 0,483114455 | 0,541746007 |
| ST13       | -0,052686773 | 8,602788673 | 0,4844851   | 0,543122427 |
| TBCK       | -0,054816119 | 4,758856614 | 0,484515711 | 0,543122427 |
| CPT2       | -0,052375928 | 5,685325173 | 0,484580855 | 0,543122427 |
| GBE1       | 0,082198673  | 5,775579452 | 0,484905626 | 0,543397118 |
| UBXN2B     | -0,052771538 | 5,651463192 | 0,485034166 | 0,543451853 |
| ATP6V1D    | 0,053252655  | 6,446926185 | 0,48581686  | 0,54423939  |
| MED24      | -0,074040652 | 6,798702877 | 0,486958863 | 0,545429121 |
| RNF214     | 0,055362501  | 4,465018725 | 0,488192661 | 0,546669208 |
| SGSM3      | 0,079764115  | 6,309485966 | 0,48822635  | 0,546669208 |
| WDR20      | 0,045532306  | 4,806150426 | 0,488672389 | 0,547078809 |
| SLC10A7    | 0,060881849  | 4,215123419 | 0,490226871 | 0,548728995 |
| FAM35A     | -0,052648568 | 5,495739817 | 0,490325752 | 0,548749598 |
| PTGR2      | -0,068060283 | 4,257306654 | 0,490941821 | 0,549297742 |
| ANKRD36    | -0,093020247 | 3,196793661 | 0,490976644 | 0,549297742 |

|              |              |             |             |             |
|--------------|--------------|-------------|-------------|-------------|
| RAD23A       | 0,055805551  | 7,389417308 | 0,491708166 | 0,550025916 |
| EIF1AX       | 0,066890459  | 7,758180264 | 0,491973373 | 0,550232316 |
| WASL         | 0,05376647   | 6,912118917 | 0,492337069 | 0,550548782 |
| AGL          | 0,083946148  | 5,561629519 | 0,492932039 | 0,551123721 |
| GZF1         | 0,065667961  | 4,845458777 | 0,493208069 | 0,551341938 |
| CSNK1A1      | 0,049817729  | 8,374513176 | 0,493843259 | 0,551961512 |
| BIRC2        | -0,061593722 | 6,375504549 | 0,49432143  | 0,552405414 |
| PMS2L2       | -0,050775482 | 3,297140971 | 0,494555275 | 0,552576179 |
| ADM          | 0,188910706  | 5,047806494 | 0,495418411 | 0,553449892 |
| LOC100288778 | -0,078986211 | 4,896198381 | 0,495596269 | 0,553557896 |
| NUDT4        | 0,07436498   | 7,220584492 | 0,496363982 | 0,554324598 |
| UBE2G1       | 0,050144992  | 6,222921376 | 0,497033132 | 0,554980993 |
| UBTF         | 0,053649542  | 7,230551543 | 0,497215889 | 0,555094163 |
| OTUD5        | -0,061786953 | 6,612499773 | 0,49742078  | 0,555232002 |
| PPARA        | -0,058293184 | 5,394509344 | 0,502212337 | 0,560488695 |
| ANXA4        | -0,111185538 | 8,060394186 | 0,502521798 | 0,560742292 |
| PRR12        | -0,080650813 | 6,029882192 | 0,50329416  | 0,561512251 |
| NRBF2        | -0,045363588 | 5,193023879 | 0,504633454 | 0,562914367 |
| LENG9        | -0,074463114 | 3,178920331 | 0,505606785 | 0,563907862 |
| ZNF595       | -0,075467103 | 3,802032982 | 0,508349103 | 0,566873677 |
| HK1          | -0,062241561 | 7,6886841   | 0,508705328 | 0,567178161 |
| KPNA4        | 0,055843466  | 6,946808648 | 0,509624    | 0,56810954  |
| ZFC3H1       | -0,068644386 | 5,329310945 | 0,511128334 | 0,569693382 |
| FBXL18       | 0,082326931  | 5,207467839 | 0,513275174 | 0,571992713 |
| RNF14        | 0,065325568  | 6,242240996 | 0,513553797 | 0,572209697 |
| RXRB         | 0,049222902  | 6,144778168 | 0,515250809 | 0,574006742 |
| VAMP7        | 0,061871032  | 6,242343946 | 0,515368714 | 0,574044309 |
| PPP2R4       | 0,049054703  | 7,643000181 | 0,516325425 | 0,575016018 |
| ATRIP        | -0,041245276 | 3,361044109 | 0,516818236 | 0,575470861 |
| GLYR1        | -0,044359189 | 7,220686997 | 0,51700096  | 0,575580334 |
| SNW1         | 0,042542533  | 6,480524553 | 0,518233145 | 0,576857952 |
| UBE4B        | 0,062711001  | 6,274874769 | 0,518600245 | 0,577172364 |
| TRIM8        | 0,079789326  | 7,748378363 | 0,518851712 | 0,577358    |
| IRF2BP2      | -0,051874745 | 8,270303944 | 0,519834945 | 0,578347483 |
| ZBTB11       | -0,039230082 | 5,377705405 | 0,519910555 | 0,578347483 |
| MGST2        | 0,083395953  | 5,704346342 | 0,520047348 | 0,578405296 |
| PLA2G12A     | -0,058844331 | 5,822124191 | 0,520424748 | 0,578730652 |
| MAP3K1       | 0,070341898  | 5,720223854 | 0,521189733 | 0,579486839 |
| FLJ45445     | 0,11878962   | 4,773840313 | 0,521869239 | 0,580147757 |
| PCYT1A       | 0,060591962  | 4,818761565 | 0,523297775 | 0,581640999 |
| GAK          | -0,05659197  | 6,92138383  | 0,523584691 | 0,58186506  |
| PPP2R3C      | 0,087176225  | 5,221694886 | 0,523673906 | 0,581869376 |
| EXOC1        | 0,046405657  | 5,88996323  | 0,523857004 | 0,581977992 |
| C4A          | -0,134115537 | 9,03091249  | 0,524354532 | 0,582435829 |
| FAM48A       | -0,047887543 | 5,701407758 | 0,525472522 | 0,583582594 |
| LUC7L3       | 0,066089592  | 6,861361366 | 0,526007853 | 0,584011346 |
| PILRB        | 0,114054814  | 5,322038879 | 0,526029871 | 0,584011346 |
| ZNF154       | 0,12505806   | 1,971426679 | 0,526140467 | 0,584039044 |
| TEP1         | -0,067467426 | 5,905936341 | 0,527892333 | 0,585835982 |
| ATG4A        | -0,055448316 | 4,754845376 | 0,527931091 | 0,585835982 |

|          |              |             |             |             |
|----------|--------------|-------------|-------------|-------------|
| RCOR3    | -0,057477545 | 5,643448394 | 0,528908662 | 0,586825279 |
| EIF4G2   | 0,043738468  | 10,52119938 | 0,529212333 | 0,587066682 |
| PIAS4    | 0,050980819  | 4,128200351 | 0,530391785 | 0,588279372 |
| USP32    | 0,062486324  | 6,428997299 | 0,531074143 | 0,588940409 |
| STAB1    | 0,115840014  | 6,499682262 | 0,531446235 | 0,589257216 |
| FGFR1OP2 | -0,076292687 | 5,432067874 | 0,532015472 | 0,589792473 |
| EDC4     | -0,054088965 | 6,263024597 | 0,533567103 | 0,591416463 |
| PLAGL2   | -0,082179124 | 5,962943193 | 0,533728957 | 0,591499716 |
| NUP188   | 0,065783166  | 6,528134144 | 0,533822313 | 0,591507044 |
| MMS19    | 0,045623622  | 6,411564753 | 0,533973797 | 0,591578768 |
| LIMA1    | -0,077670132 | 7,155747451 | 0,534143802 | 0,591670986 |
| DPYSL3   | 0,114423851  | 8,033422356 | 0,534369855 | 0,591825246 |
| TBPL1    | 0,064723136  | 4,190565164 | 0,534762781 | 0,592164242 |
| GTF2I    | -0,051879023 | 8,44363446  | 0,536097924 | 0,593529385 |
| AP2B1    | 0,056189009  | 8,641154463 | 0,536169675 | 0,593529385 |
| NKAP     | 0,041281428  | 4,958015854 | 0,53633141  | 0,593554624 |
| IRF2BP1  | 0,072510901  | 5,195413413 | 0,536366563 | 0,593554624 |
| HSPH1    | 0,075009057  | 7,199100913 | 0,536519105 | 0,593627094 |
| NINL     | -0,096439833 | 4,613264914 | 0,536681944 | 0,593710931 |
| PARP10   | 0,071642699  | 6,538888817 | 0,53772446  | 0,594767736 |
| CAP1     | 0,054054582  | 9,249174151 | 0,538632582 | 0,595666388 |
| CAPZA2   | -0,081539974 | 8,047079598 | 0,538711632 | 0,595666388 |
| NLK      | 0,052145368  | 4,989926853 | 0,539598728 | 0,59655054  |
| TMEM219  | 0,073762202  | 7,406900713 | 0,539976114 | 0,596870988 |
| CAPG     | -0,079360182 | 8,498702648 | 0,541398389 | 0,598311157 |
| ZNF629   | -0,071331872 | 5,636273236 | 0,541536319 | 0,598311157 |
| CNBP     | -0,047750403 | 8,954847689 | 0,541542229 | 0,598311157 |
| AGGF1    | 0,041316343  | 5,668086898 | 0,543035534 | 0,599863811 |
| WDR33    | 0,039203989  | 6,603874953 | 0,543283771 | 0,600040821 |
| HEATR5A  | -0,065576156 | 6,033861756 | 0,544136476 | 0,600885285 |
| DNAL4    | -0,0541502   | 5,186349902 | 0,54517564  | 0,601935345 |
| DDX21    | 0,076868328  | 7,119902013 | 0,545509708 | 0,602206686 |
| RLF      | -0,047570156 | 5,239081127 | 0,545685378 | 0,602303106 |
| ELK4     | 0,068064398  | 3,385214513 | 0,545869601 | 0,602408935 |
| WRN      | 0,060504218  | 4,229112076 | 0,546599287 | 0,603116592 |
| WIZ      | -0,055704075 | 5,817557621 | 0,547315819 | 0,603809508 |
| BAG3     | 0,085170599  | 7,002378716 | 0,547999394 | 0,604465848 |
| ZNF672   | 0,053791339  | 6,075888316 | 0,54840921  | 0,604820056 |
| DNAJC8   | 0,050498734  | 7,115706826 | 0,548758928 | 0,60510788  |
| PPP1R2   | 0,047151197  | 6,669946325 | 0,549113096 | 0,605400518 |
| RNF114   | 0,046713095  | 6,874001926 | 0,550024514 | 0,606307332 |
| VGLL4    | -0,039745943 | 6,532583884 | 0,550337868 | 0,606554699 |
| PFDN5    | 0,090404124  | 8,696206002 | 0,551174423 | 0,607378537 |
| ZBED5    | -0,052106357 | 5,746559156 | 0,551441399 | 0,607574551 |
| BCL2L1   | -0,066272045 | 8,061897517 | 0,551533722 | 0,607578101 |
| GIGYF1   | -0,072399357 | 6,141114071 | 0,551714346 | 0,607627487 |
| DDX28    | 0,055141002  | 4,351130249 | 0,551756768 | 0,607627487 |
| AEBP2    | 0,06588592   | 5,672389236 | 0,552000369 | 0,607797597 |
| TOR1AIP2 | 0,058260022  | 5,294849035 | 0,552164433 | 0,607861417 |
| HNRNPUL2 | -0,05762605  | 7,55593673  | 0,552236615 | 0,607861417 |

|           |              |             |             |             |
|-----------|--------------|-------------|-------------|-------------|
| UBAP2     | -0,064534691 | 5,854184432 | 0,55299629  | 0,608599371 |
| CYB5R1    | 0,07028901   | 6,946101214 | 0,553253672 | 0,608784378 |
| LRP10     | 0,063794566  | 8,658979234 | 0,553371197 | 0,608815455 |
| PCCA      | 0,101120551  | 4,925263527 | 0,553507868 | 0,608867584 |
| TPCN1     | -0,065153502 | 6,659626519 | 0,554149071 | 0,609474599 |
| B9D1      | -0,08924585  | 3,782632767 | 0,555487235 | 0,61084784  |
| PLEKHJ1   | -0,052981626 | 5,714280096 | 0,555832683 | 0,611129162 |
| CMIP      | -0,063053015 | 6,99227432  | 0,556208721 | 0,611383475 |
| CUL3      | 0,037882874  | 6,803905348 | 0,556243302 | 0,611383475 |
| DDX46     | -0,045355048 | 6,40356611  | 0,556526605 | 0,61159628  |
| DNASE1L1  | 0,067073051  | 5,848704096 | 0,557143716 | 0,612175798 |
| GLT8D2    | -0,101665417 | 3,762163937 | 0,558537065 | 0,613607901 |
| ANKRD13C  | -0,046854349 | 5,304038934 | 0,55865388  | 0,613637372 |
| SUOX      | 0,057794233  | 5,51386648  | 0,560941833 | 0,616007245 |
| TRAPPC9   | 0,058750327  | 5,742181378 | 0,561037536 | 0,616007245 |
| BCAT2     | -0,060843094 | 5,878125102 | 0,561170001 | 0,616007245 |
| AKAP8L    | -0,049183337 | 5,486231284 | 0,561172754 | 0,616007245 |
| PAK2      | -0,047901277 | 7,486135042 | 0,561896743 | 0,616702703 |
| KLHL21    | -0,060568316 | 5,976688359 | 0,56342594  | 0,618281539 |
| LPCAT1    | -0,120304587 | 10,1029141  | 0,564000609 | 0,618812575 |
| CTSL1     | -0,106776603 | 8,238954486 | 0,564220181 | 0,618953896 |
| GATAD2B   | -0,060083075 | 6,124593606 | 0,56453207  | 0,619196426 |
| MAP1LC3B2 | 0,057661495  | 3,272417393 | 0,565777135 | 0,62045032  |
| LETMD1    | 0,064712069  | 5,965957513 | 0,565936724 | 0,62045032  |
| MALL      | 0,127998417  | 9,056364068 | 0,565948231 | 0,62045032  |
| YTHDF2    | 0,036086732  | 7,165613367 | 0,566934731 | 0,621333929 |
| RSF1      | -0,061808238 | 5,571581928 | 0,566936458 | 0,621333929 |
| UBXN1     | 0,045244143  | 6,940454812 | 0,567233292 | 0,621559348 |
| KIRREL    | -0,100963879 | 4,232721315 | 0,567536998 | 0,621792222 |
| SYMPK     | 0,055809476  | 6,935896082 | 0,570437031 | 0,624869095 |
| AMN1      | 0,068852501  | 3,749740243 | 0,571561427 | 0,62600022  |
| IMPACT    | -0,054665349 | 5,835531348 | 0,571705238 | 0,626057173 |
| C10orf47  | -0,077633418 | 4,593889371 | 0,57228461  | 0,626460829 |
| PRDX6     | 0,052049377  | 8,477123613 | 0,572318635 | 0,626460829 |
| SLC11A2   | -0,056817287 | 6,873681543 | 0,57234946  | 0,626460829 |
| FYB       | -0,095361303 | 5,619060336 | 0,572462755 | 0,626484277 |
| FN1       | -0,111972448 | 12,2014632  | 0,572809328 | 0,626762966 |
| ETHE1     | 0,091600237  | 5,398110264 | 0,573054729 | 0,626930883 |
| GLT8D1    | -0,035821823 | 5,873895079 | 0,573202425 | 0,626991873 |
| FADS1     | -0,080118715 | 6,603900241 | 0,573348457 | 0,627014211 |
| THOC2     | 0,052168611  | 6,572445111 | 0,573406748 | 0,627014211 |
| FBXW9     | -0,059838397 | 3,585863109 | 0,57357923  | 0,627102255 |
| LRCH4     | -0,05516087  | 6,29099883  | 0,573866438 | 0,627315684 |
| PKN2      | -0,048861367 | 6,350919081 | 0,575919999 | 0,629459604 |
| CAMK1     | -0,064039531 | 4,892847602 | 0,576022407 | 0,62947064  |
| ARFRP1    | 0,0548601    | 5,547332102 | 0,576238    | 0,629605339 |
| ZNF326    | 0,053393426  | 4,412934457 | 0,576477659 | 0,629766286 |
| DDX42     | 0,050583634  | 7,445155408 | 0,577412969 | 0,630687015 |
| USP7      | -0,041238336 | 7,189438888 | 0,577756106 | 0,630960744 |
| OFD1      | -0,054924195 | 5,451692629 | 0,579581738 | 0,632853142 |

|          |              |             |             |             |
|----------|--------------|-------------|-------------|-------------|
| CD99     | 0,065874373  | 8,009346122 | 0,580391415 | 0,633635777 |
| CDC42    | -0,052648246 | 9,170907967 | 0,58382929  | 0,637287007 |
| PSMD6    | 0,03861889   | 6,147898919 | 0,584957642 | 0,638416479 |
| IL32     | 0,102205969  | 7,895122515 | 0,58698514  | 0,640526751 |
| RECQL    | 0,063152506  | 5,775981886 | 0,587158192 | 0,640613074 |
| MSH3     | -0,036629668 | 4,819403367 | 0,587450054 | 0,640828975 |
| DTX3     | -0,073098746 | 5,017504181 | 0,588350308 | 0,641708373 |
| BMP1     | 0,088254358  | 5,881582908 | 0,590257576 | 0,643685657 |
| CDK11B   | -0,047056881 | 5,893461017 | 0,591771925 | 0,645233891 |
| FAM120C  | -0,068772709 | 3,966693399 | 0,592390524 | 0,645805114 |
| VEGFB    | -0,045752543 | 6,880380404 | 0,593339639 | 0,646736413 |
| WSB2     | 0,050568628  | 7,091031572 | 0,593980872 | 0,647331879 |
| EIF3G    | 0,046227982  | 7,345787577 | 0,594803306 | 0,648124599 |
| MGAT5    | 0,090887222  | 4,238003229 | 0,595793452 | 0,649099784 |
| INTS12   | 0,041250315  | 4,715894865 | 0,595993246 | 0,64921373  |
| CNOT6    | 0,044274951  | 6,127247859 | 0,596143529 | 0,649273714 |
| C8orf40  | -0,064822393 | 5,174951072 | 0,596317753 | 0,64935975  |
| ZNF514   | 0,071057467  | 3,804713986 | 0,596483003 | 0,649435988 |
| DYNLL2   | -0,05553661  | 6,862316599 | 0,597330488 | 0,650254885 |
| SCARB1   | 0,092614441  | 5,958056866 | 0,597482274 | 0,650316302 |
| RNMT     | 0,044117279  | 5,876237167 | 0,597686264 | 0,650434509 |
| LDB1     | 0,046518347  | 6,302825055 | 0,598226717 | 0,650918778 |
| FAM160B2 | -0,049772726 | 5,854791292 | 0,598677216 | 0,651305032 |
| MLLT3    | 0,077202543  | 5,019570554 | 0,599596193 | 0,65220074  |
| ANPEP    | -0,139486268 | 6,574073709 | 0,600143824 | 0,652692303 |
| TAB3     | -0,047653031 | 5,656460944 | 0,600776449 | 0,653276129 |
| SH3YL1   | -0,065212549 | 6,353746936 | 0,601113227 | 0,653491397 |
| TEX264   | 0,054451222  | 6,305022491 | 0,601166085 | 0,653491397 |
| WRB      | -0,064448032 | 5,483143351 | 0,601595642 | 0,65385411  |
| STX5     | 0,039640607  | 6,201126121 | 0,602498658 | 0,654731211 |
| SAMD8    | -0,050974434 | 2,825773913 | 0,602969259 | 0,655138206 |
| LARP4    | 0,044160738  | 6,46269156  | 0,603589563 | 0,6557077   |
| UBQLN1   | -0,034932864 | 7,509630873 | 0,605452894 | 0,657627156 |
| ANAPC13  | -0,043542819 | 6,235930238 | 0,607079387 | 0,659288794 |
| HERC5    | -0,07526489  | 4,35043587  | 0,607193519 | 0,65930774  |
| RALGAPA1 | -0,081139465 | 5,715836402 | 0,607660666 | 0,659709932 |
| LSM14A   | 0,0470312    | 7,46914455  | 0,60788261  | 0,659845833 |
| LPIN2    | 0,085267668  | 7,488559467 | 0,609824074 | 0,661847901 |
| BIRC6    | -0,049382769 | 6,874060146 | 0,610013594 | 0,661948233 |
| PARP6    | -0,048858367 | 5,59542851  | 0,61031046  | 0,662120719 |
| HSBP1L1  | 0,073507829  | 4,336468933 | 0,610366746 | 0,662120719 |
| YTHDF3   | 0,036186245  | 6,977806796 | 0,612672412 | 0,664516173 |
| NAGA     | -0,041614159 | 6,588553033 | 0,61306514  | 0,664836385 |
| STX16    | 0,052154748  | 6,628873249 | 0,613484694 | 0,665131887 |
| MGA      | -0,048987982 | 5,732652598 | 0,613532713 | 0,665131887 |
| FAM18B2  | 0,041526394  | 4,293180762 | 0,616294035 | 0,668019238 |
| C16orf62 | 0,048262919  | 6,232851437 | 0,616928764 | 0,66860096  |
| TGFBRAP1 | -0,061478159 | 4,340226627 | 0,61742348  | 0,669030782 |
| KIAA1279 | -0,036652271 | 5,285200256 | 0,617525663 | 0,669035192 |
| C2CD3    | -0,052089472 | 5,399568744 | 0,617848863 | 0,669279014 |



|              |              |             |             |             |
|--------------|--------------|-------------|-------------|-------------|
| ANKRD36B     | -0,070664505 | 3,019798526 | 0,61844869  | 0,669770885 |
| KIAA1191     | -0,047495033 | 7,507689649 | 0,618499378 | 0,669770885 |
| FNBP1L       | 0,055700034  | 6,809236904 | 0,618823467 | 0,670015437 |
| C9orf123     | 0,069145206  | 5,544412019 | 0,619694949 | 0,67084931  |
| BLMH         | 0,068365611  | 5,422695005 | 0,619790388 | 0,67084931  |
| JAG2         | -0,082681067 | 5,394870452 | 0,621080857 | 0,672139401 |
| FDPS         | 0,063829707  | 7,677571511 | 0,621517492 | 0,672505202 |
| SYNCRIP      | 0,039037238  | 7,830206468 | 0,623174707 | 0,67419139  |
| HCFC1R1      | 0,072173585  | 6,016450886 | 0,624499902 | 0,675517898 |
| ADNP2        | 0,048723876  | 5,484375152 | 0,625873921 | 0,676896791 |
| SPCS3        | 0,044230757  | 7,902170793 | 0,626958513 | 0,677902159 |
| ANTXR2       | 0,068122121  | 6,567485372 | 0,627002334 | 0,677902159 |
| CASP9        | -0,049596309 | 4,753805233 | 0,627586297 | 0,678425961 |
| TBC1D9B      | 0,049117378  | 7,632011498 | 0,627812625 | 0,678563051 |
| FAM175B      | -0,02694112  | 5,070032936 | 0,628744834 | 0,67946292  |
| DPP7         | -0,054765977 | 7,30669018  | 0,629100922 | 0,679691379 |
| EIF4H        | -0,035252125 | 8,886937828 | 0,629155592 | 0,679691379 |
| SPDYE7P      | -0,051977312 | 4,53680326  | 0,629390374 | 0,679837314 |
| DCXR         | 0,067241911  | 6,174096581 | 0,629857867 | 0,680234526 |
| BAZ2A        | -0,053791542 | 7,523595295 | 0,630432678 | 0,680747495 |
| RAB35        | 0,033292467  | 6,215645646 | 0,630608773 | 0,680829833 |
| LOC100271836 | -0,049873891 | 4,156065939 | 0,630867333 | 0,681001162 |
| AIM1         | 0,092789708  | 6,498043559 | 0,631702141 | 0,681794381 |
| CEP170       | -0,054173454 | 6,081397927 | 0,631823017 | 0,681816926 |
| GIPC1        | 0,05073769   | 7,364471162 | 0,632566963 | 0,682485826 |
| ZBTB45       | -0,041380153 | 4,188834727 | 0,632643042 | 0,682485826 |
| GRINA        | 0,046812781  | 8,147164142 | 0,63369866  | 0,683516476 |
| CUL4A        | 0,04049697   | 6,833892694 | 0,635309332 | 0,685145396 |
| TCF25        | 0,038735835  | 7,200933701 | 0,636002704 | 0,685784699 |
| C4orf27      | 0,046977365  | 4,617733666 | 0,636702424 | 0,686430644 |
| PIAS2        | 0,058805162  | 3,933271734 | 0,63721402  | 0,686873601 |
| NUS1         | -0,034626048 | 6,94185244  | 0,637316447 | 0,686875431 |
| PPFIA1       | 0,043860236  | 6,452795119 | 0,638378536 | 0,687911384 |
| HPS6         | -0,035968679 | 5,125472482 | 0,638690589 | 0,688138905 |
| MTIF3        | -0,040478127 | 5,302850807 | 0,640136742 | 0,689588064 |
| PTPLB        | 0,063156305  | 4,408953905 | 0,643610088 | 0,693220216 |
| SPG7         | 0,039909663  | 6,16958217  | 0,643865688 | 0,693385996 |
| AHR          | -0,074489547 | 8,452693857 | 0,644455807 | 0,693911913 |
| ZNF880       | 0,097002066  | 3,337409919 | 0,644602412 | 0,693960191 |
| ZNF273       | 0,047116785  | 3,939020544 | 0,64531793  | 0,694620831 |
| LOC100129034 | 0,058841201  | 7,038178437 | 0,646060267 | 0,695310126 |
| CHMP2B       | 0,041272723  | 6,437143363 | 0,647271742 | 0,696504025 |
| LOC283070    | -0,089415546 | 5,112981274 | 0,647808515 | 0,696867797 |
| C1R          | 0,062071208  | 8,935442538 | 0,64781419  | 0,696867797 |
| MAPK9        | 0,039409382  | 6,316084143 | 0,648707094 | 0,697718245 |
| TRIP4        | 0,035653569  | 5,25907335  | 0,649052768 | 0,697979944 |
| KCNQ1OT1     | 0,084913609  | 2,856872581 | 0,650431268 | 0,699352068 |
| C11orf49     | 0,048611856  | 5,570115834 | 0,651104181 | 0,699965224 |
| DLD          | 0,041512339  | 6,617700549 | 0,652228783 | 0,701063693 |
| ZNF772       | 0,048902326  | 3,624844054 | 0,652473986 | 0,701216723 |

|          |              |             |             |             |
|----------|--------------|-------------|-------------|-------------|
| SLC1A3   | -0,084200439 | 4,569344731 | 0,653103167 | 0,701684056 |
| NOL8     | 0,036390047  | 5,177997443 | 0,653114636 | 0,701684056 |
| AMFR     | -0,041738777 | 7,196888525 | 0,653438992 | 0,701921941 |
| USP38    | -0,033911938 | 5,932491146 | 0,654547847 | 0,703002327 |
| MBTPS1   | -0,034457494 | 7,724415926 | 0,655063322 | 0,703443882 |
| NDUF4F4  | 0,050585049  | 3,821944054 | 0,655165287 | 0,703443882 |
| POLR1D   | 0,046897054  | 6,741763347 | 0,656864333 | 0,705099982 |
| SIGIRR   | -0,04835033  | 5,722785747 | 0,656914531 | 0,705099982 |
| ERCC6    | 0,044947558  | 4,102698657 | 0,657643407 | 0,705771229 |
| CTCF     | -0,029003791 | 6,340259565 | 0,658102463 | 0,706152745 |
| POLR2E   | -0,030020442 | 7,338895043 | 0,660586603 | 0,708706741 |
| TRIM14   | -0,046146806 | 6,335286517 | 0,661753263 | 0,709846705 |
| TM2D1    | 0,046884644  | 5,154702239 | 0,662129635 | 0,71013872  |
| TPCN2    | 0,056467327  | 4,706840181 | 0,662292051 | 0,71014502  |
| ATF6     | 0,035134932  | 6,876683411 | 0,662343793 | 0,71014502  |
| ZNF227   | -0,043087308 | 3,823175075 | 0,662644692 | 0,710343914 |
| VKORC1L1 | 0,047327171  | 7,236239839 | 0,662737642 | 0,710343914 |
| AIDA     | -0,0316548   | 7,475557341 | 0,662975303 | 0,710486971 |
| APOE     | 0,100907375  | 8,807337776 | 0,663277691 | 0,710699336 |
| SDHD     | 0,049792536  | 7,249071557 | 0,663620948 | 0,710955419 |
| CHKB     | -0,051094051 | 4,265929024 | 0,664620146 | 0,71191404  |
| B4GALT5  | 0,058360177  | 7,579799355 | 0,667201327 | 0,714566648 |
| LGMN     | -0,054077371 | 8,392902038 | 0,667434339 | 0,71470395  |
| PRKCA    | 0,073505484  | 5,695728199 | 0,667727504 | 0,714905613 |
| PCBP1    | -0,022072805 | 8,893654689 | 0,667848829 | 0,714909949 |
| SMAP1    | -0,034982902 | 5,775513343 | 0,667941235 | 0,714909949 |
| EIF4A2   | -0,052981982 | 8,892644988 | 0,668267859 | 0,71514729  |
| BBS5     | 0,050117868  | 4,939328123 | 0,668417098 | 0,715194758 |
| ERP44    | -0,031463074 | 6,930928992 | 0,668796427 | 0,715488365 |
| RELA     | -0,026929505 | 7,188724094 | 0,669341551 | 0,715959221 |
| HERC6    | 0,058107471  | 5,202607754 | 0,66951015  | 0,716027245 |
| CXorf26  | 0,035727521  | 5,097458482 | 0,671482038 | 0,718023524 |
| ASTE1    | -0,030104189 | 3,515473819 | 0,67263586  | 0,719144548 |
| USP9X    | 0,040184393  | 7,665884651 | 0,67388649  | 0,720276149 |
| DHCR7    | -0,052735983 | 6,556401936 | 0,673905533 | 0,720276149 |
| SF3B1    | 0,027565291  | 8,531709394 | 0,676175793 | 0,722589364 |
| C8orf4   | 0,102446874  | 8,696521549 | 0,678337342 | 0,724785699 |
| IMPA1    | 0,040554864  | 5,068522368 | 0,679324074 | 0,725726283 |
| TSPAN3   | 0,059958724  | 9,121852839 | 0,679716536 | 0,726031807 |
| TM4SF1   | 0,090867154  | 9,219237112 | 0,681018544 | 0,727308606 |
| UNC93B1  | 0,052511593  | 6,926210271 | 0,681601084 | 0,727816754 |
| KCTD17   | 0,050083747  | 4,178750458 | 0,682976858 | 0,729171629 |
| TFIP11   | 0,028444632  | 5,778057792 | 0,684239644 | 0,730405468 |
| ITPR3    | -0,060338349 | 8,393958262 | 0,685878462 | 0,732040262 |
| MAPKAP1  | -0,027987524 | 6,810356956 | 0,685992704 | 0,732047613 |
| DDB2     | -0,045101442 | 4,983334201 | 0,687046301 | 0,733057225 |
| SFMBT1   | 0,055097332  | 4,169060559 | 0,687327653 | 0,733242689 |
| EPB41    | 0,042612024  | 6,580339328 | 0,688179546 | 0,734036653 |
| LHFPL2   | -0,056434572 | 6,71948867  | 0,6884872   | 0,734249955 |
| AP3M1    | 0,02491629   | 6,454738881 | 0,689238358 | 0,7349361   |

|          |              |             |             |             |
|----------|--------------|-------------|-------------|-------------|
| THAP6    | -0,027993818 | 4,426203194 | 0,689448139 | 0,734956984 |
| SLC38A6  | -0,050796098 | 4,242046735 | 0,689473504 | 0,734956984 |
| PAK4     | -0,044800531 | 6,610826439 | 0,689924754 | 0,735323053 |
| DUSP6    | -0,07499212  | 8,431423018 | 0,690338716 | 0,735649274 |
| FZD1     | -0,065183094 | 6,213021897 | 0,690550505 | 0,735759983 |
| TARDBP   | -0,023316594 | 7,497203617 | 0,691060445 | 0,736188279 |
| SETMAR   | 0,040925794  | 4,280281385 | 0,691342522 | 0,736189084 |
| DUT      | 0,040530524  | 5,821365715 | 0,691389467 | 0,736189084 |
| TJAP1    | 0,030221279  | 5,43966066  | 0,69147264  | 0,736189084 |
| FIS1     | 0,053354334  | 7,013822656 | 0,691493047 | 0,736189084 |
| ATRN     | -0,043288886 | 6,751942226 | 0,692226843 | 0,736855268 |
| TAP2     | 0,054132752  | 7,180828234 | 0,692841753 | 0,737394711 |
| NOTCH2   | -0,04889541  | 7,938471956 | 0,693431899 | 0,737907634 |
| C6orf47  | -0,032715777 | 5,580861675 | 0,69439449  | 0,738816668 |
| TECR     | 0,036415629  | 7,177425711 | 0,695979838 | 0,740387912 |
| NOTCH2NL | 0,054203182  | 5,570945835 | 0,697482809 | 0,741871046 |
| SENP5    | 0,033408667  | 5,705327042 | 0,697874049 | 0,742171419 |
| RAD50    | 0,031592466  | 6,099991613 | 0,698184103 | 0,742281746 |
| EIF4E2   | -0,030291811 | 6,881055038 | 0,698195501 | 0,742281746 |
| NPAT     | -0,031729784 | 4,960320691 | 0,699638202 | 0,743699595 |
| RPL21    | -0,058445344 | 10,04660879 | 0,702150312 | 0,746253581 |
| FLOT2    | -0,027318277 | 7,800607359 | 0,702590632 | 0,746605192 |
| ZNF573   | -0,040035191 | 1,528207358 | 0,702763552 | 0,746672587 |
| REST     | -0,048803396 | 4,139866396 | 0,703129485 | 0,746945001 |
| HEATR7A  | -0,036564478 | 5,659682895 | 0,704484981 | 0,748268393 |
| CALM3    | 0,031193417  | 8,333615397 | 0,704945809 | 0,748641251 |
| GLG1     | 0,037130469  | 8,236832858 | 0,705935491 | 0,749575539 |
| DDX50    | 0,02664486   | 5,846167772 | 0,707290382 | 0,750897263 |
| SPTLC1   | -0,023091996 | 6,911009219 | 0,707511316 | 0,751014892 |
| DRG2     | 0,028029883  | 5,367268621 | 0,708880617 | 0,752351272 |
| CD14     | 0,075061653  | 7,391930451 | 0,70925109  | 0,752627323 |
| FAM118B  | -0,049631668 | 5,146197762 | 0,709759151 | 0,753049269 |
| AGPS     | 0,029934395  | 6,457772252 | 0,709909214 | 0,753091308 |
| FOXC1    | -0,069978194 | 3,966650167 | 0,712284234 | 0,755493264 |
| CXorf38  | -0,024605801 | 4,469237556 | 0,712710809 | 0,75582815  |
| SART1    | 0,036126864  | 6,53047426  | 0,71284381  | 0,755851647 |
| PSMF1    | 0,025286292  | 7,435831672 | 0,713239757 | 0,756153903 |
| ORAOV1   | 0,046930375  | 3,987251538 | 0,713797014 | 0,756627054 |
| N6AMT1   | -0,038827874 | 3,842528789 | 0,715182304 | 0,75797764  |
| DNPEP    | 0,026199176  | 6,510655291 | 0,715458717 | 0,757998273 |
| PAPD4    | -0,025681076 | 5,920492636 | 0,715463793 | 0,757998273 |
| MED13    | 0,038346571  | 7,061292708 | 0,715535252 | 0,757998273 |
| PTPMT1   | 0,033763316  | 6,038394266 | 0,715654847 | 0,758007207 |
| ATG4B    | -0,02498682  | 5,83021008  | 0,716451202 | 0,758732839 |
| SEL1L    | -0,035119756 | 7,803856033 | 0,717222646 | 0,759431867 |
| USP40    | -0,034199347 | 6,129451349 | 0,717736696 | 0,759858179 |
| SLFN5    | 0,053897597  | 6,260169529 | 0,718167207 | 0,760195931 |
| GFPT2    | -0,075176515 | 4,829385179 | 0,720796893 | 0,762861091 |
| ZMYM5    | -0,025928005 | 4,259535745 | 0,721268972 | 0,76324226  |
| ADI1     | 0,04404926   | 7,437443693 | 0,721851233 | 0,763739884 |

|          |              |             |             |             |
|----------|--------------|-------------|-------------|-------------|
| GTF2F1   | -0,026396831 | 6,619368034 | 0,722080184 | 0,763863602 |
| ABCC1    | 0,052308429  | 6,90246196  | 0,722589519 | 0,764283842 |
| C16orf80 | -0,027299561 | 5,390075664 | 0,724353263 | 0,766022952 |
| ASF1A    | -0,040459755 | 5,211381842 | 0,724458428 | 0,766022952 |
| CCNI     | 0,034400875  | 8,477036407 | 0,725470893 | 0,766921391 |
| GNG10    | -0,041698953 | 6,525647187 | 0,725533054 | 0,766921391 |
| PLXNB2   | 0,050962926  | 9,05730307  | 0,725748075 | 0,767029777 |
| GSTO1    | -0,052160686 | 7,414294414 | 0,729396556 | 0,770760054 |
| VPS41    | 0,032568155  | 6,608677533 | 0,72950365  | 0,770760054 |
| SLC12A9  | -0,031401792 | 6,058730216 | 0,729619694 | 0,770763237 |
| ACBD5    | 0,033304709  | 6,068237837 | 0,729850066 | 0,770765309 |
| SNX13    | 0,034859607  | 6,204709706 | 0,729901897 | 0,770765309 |
| PAF1     | 0,035213807  | 6,541604139 | 0,730034531 | 0,770765309 |
| PPP1R7   | -0,024226729 | 6,402101822 | 0,730073784 | 0,770765309 |
| DTNBP1   | -0,024302206 | 4,769494209 | 0,731300039 | 0,771940398 |
| VPS54    | 0,026681302  | 5,782827492 | 0,732071299 | 0,772634915 |
| ZNF142   | -0,031014204 | 4,932981522 | 0,733056611 | 0,773555096 |
| STXBP5   | -0,039793942 | 4,568919397 | 0,734084148 | 0,774519542 |
| TPR      | 0,037788357  | 7,496556317 | 0,734612994 | 0,774957612 |
| ATXN10   | 0,02686272   | 7,11711409  | 0,735021744 | 0,775199081 |
| ASNSD1   | 0,029716209  | 6,068634711 | 0,735069256 | 0,775199081 |
| PYCARD   | -0,056617472 | 5,43764388  | 0,73598992  | 0,776049987 |
| MED21    | -0,044218368 | 5,476254217 | 0,73681514  | 0,776800006 |
| COPS2    | -0,030709975 | 6,613880175 | 0,739476948 | 0,779485749 |
| MED12    | -0,03868353  | 6,159232517 | 0,740151774 | 0,780076499 |
| FLJ42627 | -0,041645095 | 3,787537507 | 0,740423294 | 0,780242071 |
| STK19    | -0,026494263 | 4,666193198 | 0,740904888 | 0,780543709 |
| PLEKHM1P | -0,040528375 | 4,286257663 | 0,74093847  | 0,780543709 |
| DHODH    | -0,028740106 | 4,052169383 | 0,741153357 | 0,780649481 |
| ZNF649   | -0,050423164 | 3,613527891 | 0,741359723 | 0,780746247 |
| YWHAE    | -0,02509633  | 9,385597469 | 0,74221739  | 0,78152878  |
| CARS2    | -0,02571498  | 5,575398801 | 0,743199441 | 0,782442023 |
| NLRC5    | -0,046100256 | 5,8214493   | 0,744095628 | 0,783264601 |
| BCL2L13  | -0,023983362 | 6,407958978 | 0,745432194 | 0,784550414 |
| UBE2L6   | 0,043517281  | 7,301047004 | 0,745599587 | 0,784605491 |
| RPL36AL  | 0,035176792  | 7,839201707 | 0,746041269 | 0,784949145 |
| SRP14    | -0,026938974 | 8,188756725 | 0,746724563 | 0,785546867 |
| LRRC37B  | -0,033904959 | 3,267418538 | 0,747068815 | 0,785787791 |
| ZCCHC10  | 0,034673918  | 4,673410127 | 0,747258162 | 0,785865732 |
| TMEM98   | 0,060709769  | 6,886101544 | 0,747869067 | 0,786386919 |
| PDZD8    | 0,044955341  | 5,238068652 | 0,748201383 | 0,786615053 |
| ACSL3    | 0,03242689   | 7,121457409 | 0,748767273 | 0,787053955 |
| TMEM97   | 0,049678003  | 6,152270817 | 0,748849694 | 0,787053955 |
| CHD8     | -0,031423005 | 6,800971277 | 0,749532565 | 0,787650264 |
| MRPL54   | 0,051209087  | 5,568077259 | 0,750479599 | 0,788523943 |
| ZBTB6    | 0,030471112  | 4,460440168 | 0,751262146 | 0,789224552 |
| FLNB     | 0,051084281  | 8,670272372 | 0,751482474 | 0,78933441  |
| CRYL1    | -0,042794101 | 5,595038393 | 0,752207795 | 0,789974581 |
| MICAL3   | -0,038359275 | 5,264532794 | 0,754061342 | 0,791799244 |
| SEC16A   | 0,035688033  | 7,600410831 | 0,754982336 | 0,792644273 |

|           |              |             |             |             |
|-----------|--------------|-------------|-------------|-------------|
| SPRED2    | -0,03842167  | 6,512812119 | 0,756584813 | 0,794204409 |
| TOMM7     | -0,032381113 | 7,576013426 | 0,757763571 | 0,795319346 |
| LTV1      | -0,02287549  | 5,155747657 | 0,758702474 | 0,796182236 |
| U2AF1     | -0,024211651 | 6,661298817 | 0,760719239 | 0,798175795 |
| STAG2     | -0,022013162 | 7,310688618 | 0,761064163 | 0,79841485  |
| FBXW7     | 0,035014418  | 4,8264127   | 0,762914829 | 0,800233228 |
| LOC493754 | -0,022085253 | 5,392661285 | 0,763059655 | 0,800262041 |
| GPC4      | 0,061988003  | 7,28001712  | 0,763650487 | 0,800758522 |
| LRRC37A   | -0,037660151 | 3,855800679 | 0,763979003 | 0,800858954 |
| TEX261    | -0,020434239 | 7,102677998 | 0,763981155 | 0,800858954 |
| ZNF415    | -0,044811484 | 3,206608439 | 0,765096816 | 0,801803059 |
| MRPS18C   | 0,025855667  | 4,451341119 | 0,765116953 | 0,801803059 |
| FAM98B    | -0,027261478 | 4,306209584 | 0,766191984 | 0,802766612 |
| LOC93622  | -0,02675424  | 4,321603945 | 0,76627187  | 0,802766612 |
| CLASP1    | -0,026434297 | 6,285765508 | 0,767403764 | 0,80382892  |
| CCL5      | 0,071445457  | 6,660434187 | 0,767664077 | 0,80397809  |
| COL12A1   | 0,09380178   | 7,686606495 | 0,768348863 | 0,804571698 |
| FCF1      | -0,019637265 | 5,998031419 | 0,769213835 | 0,805353775 |
| AP3B1     | 0,022023716  | 6,337130838 | 0,769503193 | 0,805533048 |
| PLEC      | 0,054221978  | 9,218363565 | 0,77015821  | 0,806094986 |
| GLT25D1   | -0,032963881 | 7,52159574  | 0,770789934 | 0,806632375 |
| PAPD7     | -0,029366661 | 5,452315246 | 0,771602133 | 0,807358438 |
| RSBN1L    | -0,022230283 | 4,991867886 | 0,772206102 | 0,807866433 |
| TRAPPC6B  | 0,028613991  | 5,492817374 | 0,772364807 | 0,807908516 |
| CDK13     | 0,022687001  | 6,041220504 | 0,773252837 | 0,808713358 |
| SEC11A    | 0,034003459  | 7,449008401 | 0,773409871 | 0,808753552 |
| RLIM      | -0,020725154 | 6,532038336 | 0,773766261 | 0,809002167 |
| EIF3A     | -0,027672569 | 8,452447721 | 0,774192689 | 0,809227061 |
| UGCG      | 0,040831077  | 5,043949432 | 0,774218705 | 0,809227061 |
| EEF2      | 0,033647767  | 11,4388132  | 0,774382124 | 0,809273824 |
| DDX26B    | 0,040362925  | 3,329088638 | 0,774974175 | 0,809768449 |
| SYPL1     | -0,026147078 | 7,611889571 | 0,775545099 | 0,81024085  |
| ZNF827    | 0,041914783  | 3,512816187 | 0,777660555 | 0,812326489 |
| SLC30A9   | 0,024037868  | 6,722927369 | 0,778350173 | 0,81292232  |
| C1orf52   | -0,026835942 | 4,534928498 | 0,778612246 | 0,813071501 |
| SLC25A3   | 0,020749694  | 8,743061643 | 0,779188201 | 0,813548361 |
| CCDC71    | 0,023059511  | 4,981807704 | 0,779553284 | 0,813804936 |
| C21orf59  | 0,027154399  | 5,756759646 | 0,77975771  | 0,813893743 |
| ANAPC10   | -0,022780735 | 3,742980059 | 0,78017942  | 0,814209284 |
| RANBP6    | -0,029867045 | 5,234872795 | 0,781550574 | 0,815515435 |
| PEG10     | 0,106294507  | 7,280488843 | 0,782360785 | 0,816235953 |
| PPIP5K2   | -0,020384277 | 5,55990907  | 0,78261137  | 0,816372485 |
| NCOA3     | -0,026701333 | 6,667496332 | 0,784193189 | 0,817897424 |
| FLNC      | 0,098585359  | 5,53660996  | 0,787218852 | 0,820927566 |
| CCDC22    | -0,01716484  | 5,056173166 | 0,787962682 | 0,821577604 |
| FAM192A   | -0,016330865 | 6,358204742 | 0,788255319 | 0,821757074 |
| IFITM3    | 0,035926395  | 9,482856754 | 0,789999132 | 0,823449111 |
| ARMC7     | -0,025901161 | 4,932132865 | 0,790130773 | 0,823460453 |
| ARHGAP4   | -0,038141775 | 5,732879665 | 0,791345907 | 0,824600816 |
| RASA1     | 0,031305987  | 5,925102214 | 0,79360684  | 0,826705663 |

|           |              |             |             |             |
|-----------|--------------|-------------|-------------|-------------|
| CCNG1     | 0,034133764  | 6,842696501 | 0,79360834  | 0,826705663 |
| TMBIM4    | 0,038102371  | 7,230320011 | 0,794329524 | 0,827330536 |
| QTRTD1    | -0,019540627 | 5,269092826 | 0,796424232 | 0,829385589 |
| ABI1      | 0,018708177  | 6,763991806 | 0,796943382 | 0,8297995   |
| GATAD2A   | 0,024615059  | 6,76111745  | 0,797386337 | 0,830133959 |
| HIST4H4   | -0,033042073 | 0,860753247 | 0,798480436 | 0,831110479 |
| MFAP1     | 0,021245395  | 5,576077906 | 0,798568098 | 0,831110479 |
| NUP153    | -0,024098658 | 6,470287707 | 0,799855145 | 0,832322941 |
| NFKB2     | 0,034706372  | 6,384729968 | 0,801187478 | 0,833582151 |
| LIN7C     | -0,018137097 | 5,758818088 | 0,802084011 | 0,834387624 |
| FTSJD2    | -0,017715278 | 6,277929895 | 0,802381068 | 0,834569326 |
| CYP1B1    | 0,058488755  | 6,847427242 | 0,802713717 | 0,834787988 |
| CELF1     | -0,023842371 | 6,822345738 | 0,802926887 | 0,834882348 |
| VCPIP1    | 0,017706058  | 5,547798872 | 0,803464988 | 0,835314492 |
| CSNK1E    | 0,023875583  | 6,979162522 | 0,805436151 | 0,83717533  |
| RBM10     | 0,025888193  | 6,171479174 | 0,805500417 | 0,83717533  |
| TET3      | 0,035387069  | 5,443638099 | 0,805723447 | 0,837279516 |
| CCNT1     | 0,038221717  | 3,398241797 | 0,805849002 | 0,837282393 |
| RNF138    | 0,028592653  | 5,423005796 | 0,807066546 | 0,83841968  |
| JMJD8     | 0,024788499  | 6,639575371 | 0,807491007 | 0,838732852 |
| PPOX      | 0,030172079  | 4,372299261 | 0,807972432 | 0,839105089 |
| FAM198B   | 0,047322756  | 6,209773045 | 0,808813681 | 0,839850844 |
| LOC220729 | 0,030527201  | 3,377098879 | 0,809193345 | 0,840117147 |
| DOCK5     | 0,046632628  | 5,22664291  | 0,811225258 | 0,841977713 |
| DCAF7     | 0,020655869  | 7,731656784 | 0,811232377 | 0,841977713 |
| FBRS      | 0,021520663  | 6,699465183 | 0,811750542 | 0,8423873   |
| ASH1L     | -0,027746788 | 6,831939928 | 0,812438013 | 0,84297243  |
| SCNN1A    | 0,047400836  | 8,527180133 | 0,81259999  | 0,843012221 |
| GATAD1    | -0,015027716 | 6,05377595  | 0,813609231 | 0,843930841 |
| TPT1      | 0,038693365  | 12,44527168 | 0,815023441 | 0,845269178 |
| PYROXD1   | -0,023356391 | 5,712943749 | 0,815812071 | 0,845958411 |
| GPATCH8   | -0,020670533 | 6,314204846 | 0,815956753 | 0,845979793 |
| DHX29     | -0,022479624 | 5,820857169 | 0,816086173 | 0,845985347 |
| SCAF1     | -0,02307119  | 6,674117133 | 0,817609453 | 0,847435608 |
| C2orf18   | 0,017544515  | 6,649439421 | 0,822185216 | 0,852048782 |
| YEATS2    | -0,025214796 | 6,042763584 | 0,822998425 | 0,85276193  |
| USF2      | 0,02509814   | 7,154223354 | 0,824042526 | 0,853605699 |
| ZNF823    | -0,023343715 | 2,863299943 | 0,824063106 | 0,853605699 |
| PIGH      | 0,019835287  | 4,545050127 | 0,825204736 | 0,854658429 |
| TYK2      | -0,017720147 | 6,416675982 | 0,827032488 | 0,856421342 |
| MED23     | -0,017888539 | 5,356882584 | 0,829988642 | 0,859352042 |
| ZMAT2     | 0,014623247  | 6,823767266 | 0,830129851 | 0,859367762 |
| GNG5      | 0,024251898  | 7,242691239 | 0,831182673 | 0,860280533 |
| PITPNB    | 0,015741569  | 6,438552144 | 0,831263885 | 0,860280533 |
| RSRC2     | 0,013769917  | 6,247003577 | 0,831475906 | 0,860369378 |
| LYRM1     | -0,027196256 | 5,442712928 | 0,831650496 | 0,860419471 |
| VAV3      | -0,038535552 | 4,117867934 | 0,832295163 | 0,860955812 |
| AQR       | -0,014129263 | 5,837812918 | 0,832523485 | 0,861061045 |
| CDK3      | 0,020613843  | 4,378432239 | 0,83264944  | 0,861061045 |
| RPF1      | 0,019713252  | 5,420854401 | 0,834267385 | 0,862603381 |

|          |              |             |             |             |
|----------|--------------|-------------|-------------|-------------|
| SEPW1    | 0,038703754  | 8,631941608 | 0,834469408 | 0,862681457 |
| EIF4B    | 0,020434012  | 9,423954288 | 0,835330622 | 0,863440884 |
| OGFRL1   | 0,030363133  | 4,602116903 | 0,837590202 | 0,865525495 |
| TESK1    | -0,016106101 | 5,650409459 | 0,837698391 | 0,865525495 |
| CNOT1    | -0,016338877 | 7,970120386 | 0,837728152 | 0,865525495 |
| SETD7    | 0,020421711  | 7,180471714 | 0,839019961 | 0,866728846 |
| HOOK2    | -0,020465132 | 5,413360065 | 0,841227217 | 0,86887737  |
| RHOA     | -0,029655809 | 6,465433733 | 0,841373344 | 0,868896688 |
| LUC7L    | -0,020828357 | 5,386274649 | 0,841821817 | 0,869146025 |
| INSR     | 0,030203593  | 6,566577368 | 0,841869702 | 0,869146025 |
| ATP5S    | 0,02310656   | 3,409445416 | 0,84226332  | 0,869420766 |
| INTS10   | 0,022131556  | 6,22448897  | 0,843264742 | 0,870322729 |
| GRIPAP1  | -0,021001389 | 6,190434417 | 0,843684927 | 0,870624624 |
| DGCR11   | 0,024794547  | 2,045669329 | 0,844978403 | 0,871827467 |
| DBNL     | 0,017620838  | 7,547181173 | 0,845457121 | 0,872189426 |
| SETD5    | 0,018680368  | 6,863407857 | 0,846444891 | 0,873076344 |
| CUTC     | -0,017986191 | 4,299273806 | 0,846915531 | 0,873429674 |
| S100A10  | 0,037341801  | 9,633293172 | 0,84717071  | 0,873560725 |
| TPM2     | -0,029762604 | 7,174927966 | 0,848556496 | 0,874857385 |
| NBEA     | -0,035123807 | 4,32657129  | 0,849821573 | 0,876029222 |
| ABCA2    | -0,022565854 | 5,889705397 | 0,850352395 | 0,876443921 |
| SNX7     | 0,023554695  | 4,921013926 | 0,851425186 | 0,877417008 |
| DRAM2    | -0,018692367 | 6,175509941 | 0,851800439 | 0,877671078 |
| HNMT     | 0,036457299  | 6,54689434  | 0,852128787 | 0,877876749 |
| C9orf64  | 0,013223633  | 4,962835308 | 0,852295559 | 0,877915924 |
| DNAJC15  | 0,029541573  | 5,877568701 | 0,852467102 | 0,877960001 |
| CLN3     | -0,017436618 | 6,457552243 | 0,853990841 | 0,879280319 |
| C2orf69  | -0,013408534 | 4,802842119 | 0,854006973 | 0,879280319 |
| ARID1A   | 0,02286655   | 7,3896324   | 0,854774144 | 0,879937332 |
| EXT1     | -0,017790577 | 6,528633479 | 0,855396028 | 0,880444606 |
| SPPL3    | 0,01398766   | 6,442652359 | 0,858792838 | 0,88380748  |
| MAX      | -0,011396013 | 6,428251584 | 0,860446876 | 0,885301022 |
| HINT2    | 0,019998475  | 4,962794144 | 0,860503765 | 0,885301022 |
| RTTN     | -0,020070313 | 3,666214624 | 0,860747501 | 0,885418194 |
| CPSF7    | 0,011502789  | 6,808272352 | 0,86188699  | 0,886456619 |
| CCDC91   | -0,015489938 | 5,163536699 | 0,862444891 | 0,886896654 |
| HIGD1A   | -0,023019104 | 7,302260293 | 0,862663742 | 0,886987946 |
| FAM20A   | 0,040730695  | 6,192012231 | 0,864573937 | 0,888817982 |
| SARS     | 0,013671945  | 7,578868095 | 0,865447137 | 0,889581553 |
| GDAP2    | 0,011728896  | 4,87285955  | 0,866181912 | 0,890202631 |
| ESF1     | 0,01966179   | 4,653489309 | 0,867819305 | 0,891632754 |
| JKAMP    | -0,012873689 | 5,994760964 | 0,86783496  | 0,891632754 |
| SPIN4    | -0,021373408 | 3,98184926  | 0,86897727  | 0,892543798 |
| SUV420H1 | -0,012919214 | 6,04005423  | 0,868983469 | 0,892543798 |
| GNB1     | -0,011369001 | 9,214891852 | 0,869127241 | 0,892557027 |
| NGLY1    | -0,010310005 | 5,13655031  | 0,870414013 | 0,893573422 |
| GALK2    | -0,011862381 | 4,843254586 | 0,870463047 | 0,893573422 |
| TTC17    | -0,013162646 | 6,39129597  | 0,870510081 | 0,893573422 |
| ACTR8    | 0,011692334  | 4,763616594 | 0,871329378 | 0,894279805 |
| ATP5A1   | 0,017581367  | 9,031615023 | 0,871740953 | 0,894479121 |

|          |              |             |             |             |
|----------|--------------|-------------|-------------|-------------|
| MRPS36   | -0,017308504 | 5,116053726 | 0,871785927 | 0,894479121 |
| LRMP     | -0,028465782 | 3,678979765 | 0,872837755 | 0,895423597 |
| GLB1     | 0,013985668  | 7,055195016 | 0,873761302 | 0,896236209 |
| ZNF141   | -0,013112979 | 2,783955586 | 0,874001285 | 0,896347535 |
| MARVELD1 | 0,022926609  | 6,268479057 | 0,874237374 | 0,896454835 |
| MDFIC    | 0,025219576  | 6,62756473  | 0,87492506  | 0,897025106 |
| CSNK2A2  | 0,013723128  | 5,034686392 | 0,875430236 | 0,897408115 |
| C7orf26  | 0,01245468   | 5,250360095 | 0,876099667 | 0,897949814 |
| ZNF571   | -0,017227597 | 2,888240356 | 0,876307752 | 0,897949814 |
| RAP1B    | -0,019366305 | 8,051472161 | 0,87635372  | 0,897949814 |
| MCFD2    | 0,013501972  | 7,782669763 | 0,877460668 | 0,898948962 |
| TNPO3    | 0,015232026  | 6,066427686 | 0,878261461 | 0,899634205 |
| TAF15    | 0,020296528  | 7,393039309 | 0,879426091 | 0,900604726 |
| PRPSAP1  | 0,011931729  | 5,688979158 | 0,879473071 | 0,900604726 |
| COG3     | 0,013501208  | 5,403297366 | 0,880241566 | 0,901256342 |
| ANKRD10  | -0,015063484 | 6,485980537 | 0,880812905 | 0,90170593  |
| RNF219   | -0,012670819 | 4,249225698 | 0,881556556 | 0,902331756 |
| ATP11B   | -0,013523715 | 6,507010588 | 0,881717776 | 0,902361326 |
| RGL2     | 0,015475088  | 6,682171462 | 0,883433215 | 0,903981256 |
| KIF21A   | 0,0245217    | 5,333722006 | 0,886276384 | 0,90667964  |
| SLC44A3  | 0,029429265  | 5,124640085 | 0,88633619  | 0,90667964  |
| ZNF646   | 0,014629289  | 5,101992564 | 0,886692082 | 0,90690765  |
| TIMM22   | -0,010220411 | 4,697088834 | 0,886910386 | 0,906994889 |
| MTERFD2  | 0,011922801  | 4,732067557 | 0,887064867 | 0,907016843 |
| SDHAP2   | -0,01720107  | 3,779845973 | 0,887704392 | 0,90753467  |
| MLH3     | 0,013185495  | 4,608178142 | 0,888235684 | 0,907941707 |
| HADHB    | 0,009194968  | 7,327900017 | 0,889476201 | 0,909073473 |
| POGZ     | 0,017605123  | 6,8298348   | 0,891236397 | 0,91073595  |
| DTNB     | 0,014762903  | 4,682297211 | 0,894054396 | 0,913478712 |
| RAB7L1   | -0,013312722 | 5,49286977  | 0,895063009 | 0,914279378 |
| GSTK1    | 0,017607586  | 7,120397806 | 0,895106192 | 0,914279378 |
| CBLL1    | -0,00905303  | 5,273345006 | 0,895556755 | 0,914602592 |
| GNS      | 0,018633568  | 8,909669074 | 0,895792825 | 0,914670197 |
| CSF1R    | -0,019786655 | 7,065192841 | 0,895891222 | 0,914670197 |
| ORMDL3   | -0,013238232 | 7,235314092 | 0,896444579 | 0,915098141 |
| KIAA0753 | -0,010750254 | 4,510467132 | 0,89667648  | 0,915197862 |
| TRAPPC1  | -0,010317183 | 6,799416849 | 0,89729754  | 0,915694691 |
| PLSCR3   | 0,01033803   | 5,574075626 | 0,897785797 | 0,916035317 |
| HDDC2    | -0,012638705 | 5,807976328 | 0,897899994 | 0,916035317 |
| FSTL1    | -0,016230685 | 8,46368207  | 0,899126701 | 0,917146831 |
| FAM76B   | -0,010129172 | 4,225820224 | 0,8992585   | 0,917146831 |
| FAM135A  | 0,015586179  | 5,035898101 | 0,900019003 | 0,917785192 |
| YES1     | -0,010870386 | 6,724347    | 0,90020136  | 0,917833893 |
| EEFSEC   | -0,008802178 | 4,775918675 | 0,901218282 | 0,918733363 |
| FAM168A  | -0,013982386 | 3,722432973 | 0,902023812 | 0,91937512  |
| HS1BP3   | 0,012790431  | 5,917935694 | 0,902117456 | 0,91937512  |
| TAF8     | -0,009154559 | 5,636397125 | 0,902659844 | 0,919790418 |
| VEGFA    | 0,024423625  | 8,321713908 | 0,90301461  | 0,920014437 |
| PBXIP1   | -0,01368503  | 8,166201721 | 0,903324245 | 0,920192415 |
| HPS4     | -0,009186582 | 5,590523584 | 0,90453519  | 0,921288343 |



|          |              |             |             |             |
|----------|--------------|-------------|-------------|-------------|
| SQRDL    | 0,020977933  | 7,372592136 | 0,906692666 | 0,923162163 |
| SEPT2    | 0,008794836  | 9,292463281 | 0,906711165 | 0,923162163 |
| ZNF780A  | -0,009692118 | 4,31975559  | 0,906781077 | 0,923162163 |
| KPNA6    | 0,008932741  | 7,090813592 | 0,907619007 | 0,923714421 |
| TOX4     | 0,007954964  | 6,949723349 | 0,90770659  | 0,923714421 |
| CBWD2    | -0,007294647 | 4,656384156 | 0,907796501 | 0,923714421 |
| CNN2     | -0,011813979 | 8,426232391 | 0,907865384 | 0,923714421 |
| KIAA1704 | 0,009971133  | 4,51362133  | 0,908015235 | 0,92372906  |
| CAMK2G   | -0,009407333 | 6,111208131 | 0,908463864 | 0,924047597 |
| EEF1A1   | 0,016868261  | 14,18251182 | 0,908901498 | 0,924354856 |
| FYTTD1   | -0,008545708 | 6,650842376 | 0,90946915  | 0,924794234 |
| RBM7     | -0,010407698 | 5,631693163 | 0,909856671 | 0,925050341 |
| COPS4    | -0,008987428 | 5,717765249 | 0,910024032 | 0,925082569 |
| CYB5R4   | -0,011795016 | 5,238929304 | 0,911468469 | 0,926412802 |
| DYNLRB1  | -0,008567539 | 7,191659029 | 0,912416004 | 0,927237665 |
| TUBGCP4  | 0,010195174  | 4,243403947 | 0,913304191 | 0,928001979 |
| IPPK     | 0,011124717  | 3,979391866 | 0,913819246 | 0,928386984 |
| KIAA1468 | -0,00915996  | 5,198337072 | 0,914734429 | 0,929178321 |
| CIZ1     | -0,008126092 | 6,763869049 | 0,916423555 | 0,930642058 |
| RRP15    | -0,007220939 | 5,406093719 | 0,916448368 | 0,930642058 |
| MIB1     | 0,011511537  | 6,366818701 | 0,917146267 | 0,93121209  |
| TSC2     | -0,00850969  | 6,730661819 | 0,918512431 | 0,932460365 |
| RBBP9    | -0,008837346 | 5,734607088 | 0,919035193 | 0,932850695 |
| ZFYVE27  | 0,00878477   | 5,301916692 | 0,919170526 | 0,932850695 |
| GOLGA1   | -0,007332478 | 5,089840411 | 0,91962692  | 0,933118811 |
| TUG1     | -0,008604408 | 7,648570528 | 0,919708392 | 0,933118811 |
| ACTB     | -0,008389184 | 13,03855225 | 0,920279209 | 0,933559049 |
| ATG3     | -0,00695184  | 6,031409679 | 0,921184466 | 0,934338372 |
| SPG21    | 0,00823129   | 7,186155782 | 0,921586897 | 0,934607532 |
| FAM118A  | -0,010066577 | 4,423842968 | 0,921967625 | 0,934854607 |
| RELT     | -0,009841864 | 4,196923352 | 0,923055622 | 0,935818657 |
| RAD52    | 0,012917878  | 2,995252507 | 0,92366748  | 0,936299769 |
| ZNF641   | -0,009202307 | 3,648570504 | 0,925810788 | 0,938332902 |
| BHLHE40  | -0,011750384 | 8,720719072 | 0,926099373 | 0,9384859   |
| UBQLN2   | -0,006565148 | 6,325487132 | 0,927678636 | 0,9399466   |
| EPHX1    | -0,013144524 | 8,886363995 | 0,928640472 | 0,940781366 |
| YPEL3    | -0,009128939 | 6,328404817 | 0,92892196  | 0,940926744 |
| ANGEL2   | -0,005387904 | 5,319116339 | 0,929823143 | 0,94169969  |
| WBP11    | 0,00840901   | 6,989040509 | 0,930804165 | 0,942520924 |
| FUBP3    | 0,007056332  | 6,216819113 | 0,93091046  | 0,942520924 |
| NDFIP2   | -0,008435552 | 6,233967532 | 0,931554393 | 0,943032869 |
| ZNF318   | 0,0108339    | 5,401261719 | 0,932138759 | 0,943484369 |
| SLC4A2   | 0,008925039  | 7,464184163 | 0,932510161 | 0,943720212 |
| ZDHHC20  | -0,009078229 | 4,590524452 | 0,933707414 | 0,944791639 |
| SREBF1   | -0,008557382 | 7,196743112 | 0,934579245 | 0,945533513 |
| SGPP1    | 0,010268644  | 5,666634793 | 0,935115394 | 0,945935599 |
| SNX16    | -0,007263754 | 3,92475457  | 0,935664124 | 0,946350291 |
| KCTD20   | -0,005934547 | 6,794888833 | 0,938089331 | 0,948662486 |
| CAMLG    | 0,008024524  | 5,802211181 | 0,938586758 | 0,949024778 |
| MAPKAPK2 | 0,007317868  | 7,93352191  | 0,938763542 | 0,949062801 |

|          |              |             |             |             |
|----------|--------------|-------------|-------------|-------------|
| HDGFRP2  | -0,005455792 | 5,843663948 | 0,9410702   | 0,951253734 |
| RBPJ     | 0,009022553  | 5,950910152 | 0,942123008 | 0,952111382 |
| TRAF3    | 0,006988523  | 4,435225843 | 0,942197919 | 0,952111382 |
| DNTTIP2  | 0,006860569  | 6,534348832 | 0,94261039  | 0,952387057 |
| MS4A6A   | 0,018922051  | 6,594429016 | 0,94365538  | 0,953301635 |
| FADS2    | 0,019651941  | 6,881672913 | 0,944522564 | 0,954036345 |
| C6orf62  | 0,005404886  | 7,99389605  | 0,944834117 | 0,954209693 |
| FAM175A  | 0,010195372  | 4,388155616 | 0,945671558 | 0,954857589 |
| TMED5    | 0,009260898  | 7,424009391 | 0,945755706 | 0,954857589 |
| STRN     | -0,006138265 | 4,452401045 | 0,94648934  | 0,955456819 |
| ZNF77    | -0,006254216 | 2,497519774 | 0,947275409 | 0,956108794 |
| UPF1     | -0,005381321 | 7,299788939 | 0,947785633 | 0,956482201 |
| RSAD1    | 0,006158452  | 5,324948465 | 0,948440703 | 0,957001651 |
| POLR2L   | -0,005825354 | 7,130497909 | 0,949840782 | 0,958145812 |
| METTL10  | 0,005632701  | 3,975252003 | 0,949855652 | 0,958145812 |
| TNK2     | 0,009006918  | 5,82440394  | 0,951331383 | 0,959492486 |
| LYAR     | -0,005060899 | 4,624745871 | 0,951508033 | 0,95952873  |
| ZNF625   | 0,010868058  | 1,086209244 | 0,951950433 | 0,959832915 |
| ATF1     | 0,007329673  | 5,327300956 | 0,952096172 | 0,959837935 |
| NRARP    | 0,018530155  | 3,977599899 | 0,952513666 | 0,959983519 |
| YBX1     | -0,004675374 | 9,368870669 | 0,952522142 | 0,959983519 |
| FAM127C  | -0,005300235 | 4,718817632 | 0,954536631 | 0,961871625 |
| HDAC6    | -0,005072706 | 6,184976789 | 0,955199188 | 0,962397054 |
| RALB     | 0,007802543  | 6,977871764 | 0,955720309 | 0,962779848 |
| HERC4    | 0,003849547  | 5,938844843 | 0,956579125 | 0,963502667 |
| DDX58    | 0,008503781  | 5,592052536 | 0,957355309 | 0,964105794 |
| TWF2     | -0,003723115 | 6,20621661  | 0,957460688 | 0,964105794 |
| CLTB     | -0,004855777 | 6,635087026 | 0,957925955 | 0,964431874 |
| DHPS     | -0,00349411  | 5,736844196 | 0,958200826 | 0,964566199 |
| ARL6IP4  | -0,003706304 | 7,235039085 | 0,96054584  | 0,966778252 |
| ADCY3    | -0,003815998 | 5,863178884 | 0,960681836 | 0,966778252 |
| PCBP4    | -0,003624256 | 5,177663641 | 0,961811401 | 0,967772163 |
| PKP4     | -0,003379158 | 6,684776551 | 0,962643292 | 0,968466304 |
| TUBG2    | -0,00290899  | 4,791900821 | 0,96585622  | 0,971555327 |
| PCMTD2   | 0,005080034  | 6,262219171 | 0,966138101 | 0,971695532 |
| KIAA1919 | -0,00284823  | 3,268966661 | 0,966841747 | 0,972259825 |
| DLST     | -0,00206602  | 7,208523011 | 0,969534568 | 0,974823978 |
| GNG12    | 0,007317638  | 7,60345406  | 0,969703402 | 0,974849992 |
| SLC25A44 | -0,0023349   | 5,998563826 | 0,970693693 | 0,975701694 |
| NFATC2IP | -0,001898202 | 5,804233281 | 0,971200873 | 0,976067613 |
| ARID4B   | -0,001763059 | 6,492027741 | 0,972371932 | 0,977100531 |
| IL13RA1  | 0,00387359   | 8,002763439 | 0,97315511  | 0,977743435 |
| VTI1B    | 0,003307914  | 6,279473067 | 0,9734608   | 0,977871325 |
| GBF1     | -0,002035394 | 7,183150697 | 0,973661054 | 0,977871325 |
| PLA2G16  | -0,001375775 | 6,493197528 | 0,973712611 | 0,977871325 |
| NRP1     | 0,007003669  | 8,115791628 | 0,973909371 | 0,977924901 |
| TANC2    | 0,007172446  | 6,862463628 | 0,975647596 | 0,979526054 |
| USP6NL   | 0,003589466  | 5,465199733 | 0,97590951  | 0,979644773 |
| ERBB2IP  | -0,00154801  | 7,028936179 | 0,976412461 | 0,980005383 |
| SMAD5    | 0,002710635  | 6,524440591 | 0,976590851 | 0,980040179 |

|              |              |             |             |             |
|--------------|--------------|-------------|-------------|-------------|
| CASC4        | 0,003574652  | 7,668913853 | 0,977467817 | 0,980775904 |
| CCDC112      | 0,003506343  | 3,665468119 | 0,978302618 | 0,981469112 |
| AHCYL1       | 0,003004408  | 7,836883249 | 0,978688746 | 0,981694432 |
| ARRDC3       | -0,000995893 | 8,254482816 | 0,978815141 | 0,981694432 |
| LOC146880    | 0,007095853  | 4,977472238 | 0,979283573 | 0,982019806 |
| VPS26A       | -0,001180212 | 6,795483008 | 0,979587117 | 0,98217976  |
| ORMDL1       | -0,001294143 | 5,616895524 | 0,980048296 | 0,982497696 |
| DNAJC5       | 0,003905869  | 7,264757547 | 0,980469798 | 0,982775769 |
| MAP1S        | -0,001161316 | 6,032156149 | 0,980890386 | 0,983052843 |
| SYNRG        | -0,000885333 | 6,558930239 | 0,982707871 | 0,984729607 |
| SIPA1L1      | -0,000633635 | 6,278499753 | 0,983101308 | 0,98497911  |
| MTSSL1L      | 0,005113435  | 6,416118184 | 0,98481462  | 0,986550741 |
| CXADR        | 0,006203954  | 5,187305185 | 0,987199691 | 0,988794755 |
| PRPF38A      | -0,000540458 | 5,786456077 | 0,987516413 | 0,988912915 |
| MTMR2        | 0,002104933  | 5,811241029 | 0,987607706 | 0,988912915 |
| USP49        | 0,005011572  | 1,111307837 | 0,988282901 | 0,989443709 |
| RUNDC1       | -0,000219629 | 5,558833982 | 0,990429707 | 0,991447471 |
| CCDC97       | -0,000129249 | 6,008204559 | 0,991153676 | 0,992026554 |
| CDK9         | 0,001448525  | 6,362828847 | 0,99158999  | 0,992317602 |
| EXOSC7       | 0,001800727  | 5,225100964 | 0,99385119  | 0,994357334 |
| CERK         | 0,001964155  | 6,193737539 | 0,993919869 | 0,994357334 |
| ANO10        | 0,00141991   | 5,49301839  | 0,9941226   | 0,99441426  |
| LOC100132832 | 0,00199093   | 2,414644934 | 0,996725437 | 0,996871628 |
| C11orf58     | 0,000865566  | 7,973997205 | 0,998782391 | 0,998782391 |

**Table S1\_C: edgeR results**

logFC, log fold change; logCPM, log counts per million; p value; FDR, Benjamini-Hochberg adjusted p value are reported for lung squamous cell carcinoma (LUSC) dataset

| Gene     | logFC        | logCPM      | PValue      | FDR         |
|----------|--------------|-------------|-------------|-------------|
| CSRNP1   | -3,513502506 | 6,016918944 | 1,06E-122   | 7,24E-119   |
| VWF      | -3,869389251 | 8,355253213 | 9,46E-122   | 3,22E-118   |
| DLC1     | -4,107237839 | 6,058525597 | 1,69E-118   | 3,85E-115   |
| AGER     | -6,328595879 | 7,621821398 | 3,47E-115   | 5,92E-112   |
| A2M      | -3,888118597 | 10,34672173 | 2,50E-106   | 3,4092E-103 |
| SNRK     | -1,85788022  | 5,633731632 | 2,5311E-103 | 2,8766E-100 |
| CD93     | -3,430246875 | 7,000678667 | 2,7604E-99  | 2,68905E-96 |
| TNS1     | -3,348591018 | 8,005370368 | 8,60654E-95 | 7,336E-92   |
| SYNE1    | -3,279746041 | 5,832261967 | 5,04931E-93 | 3,8257E-90  |
| SUSD2    | -4,780659314 | 6,499717361 | 6,17845E-93 | 4,21308E-90 |
| SNX30    | -2,512376837 | 5,732696887 | 1,1594E-92  | 7,18724E-90 |
| EPAS1    | -3,506234166 | 8,979707633 | 1,17431E-90 | 6,67299E-88 |
| SLC39A8  | -3,668285792 | 6,906641741 | 8,3687E-90  | 4,3897E-87  |
| GPR146   | -2,87861466  | 2,840381872 | 8,16586E-89 | 3,97736E-86 |
| SPTBN1   | -2,385173145 | 8,909092985 | 1,74199E-88 | 7,91908E-86 |
| GRK5     | -2,831376921 | 4,853286345 | 2,55953E-87 | 1,09084E-84 |
| SNX25    | -2,390582742 | 4,768576763 | 3,12323E-82 | 1,25278E-79 |
| EMP2     | -2,753048839 | 8,770107541 | 3,41278E-82 | 1,29287E-79 |
| LMO7     | -2,939923759 | 7,250619967 | 3,83301E-80 | 1,37565E-77 |
| MRC1     | -3,987558834 | 6,645642982 | 7,09839E-76 | 2,4202E-73  |
| KIAA1462 | -3,188738491 | 5,737861545 | 2,52623E-74 | 8,20303E-72 |
| ARHGAP31 | -2,914340221 | 5,641606991 | 6,90993E-70 | 2,14176E-67 |
| SHROOM4  | -3,024709031 | 4,513631252 | 1,29626E-69 | 3,84313E-67 |
| RBMS2    | -1,992870256 | 6,270112688 | 4,90597E-69 | 1,35229E-66 |
| KANK2    | -2,581223711 | 6,254690401 | 4,9578E-69  | 1,35229E-66 |
| LIMD1    | -1,796076641 | 5,861210461 | 5,75916E-69 | 1,51045E-66 |
| KLF2     | -3,081081947 | 4,222317951 | 4,02386E-68 | 1,01625E-65 |
| LTA4H    | -1,848528083 | 7,422067755 | 1,2948E-67  | 3,15329E-65 |
| GPX3     | -3,67841198  | 8,111621197 | 1,22302E-66 | 2,87579E-64 |
| GADD45B  | -2,855067568 | 6,046334491 | 1,74296E-65 | 3,96174E-63 |
| SMAD6    | -3,033543324 | 3,198139599 | 1,05055E-64 | 2,31087E-62 |
| STX11    | -2,785402482 | 4,532879323 | 3,13677E-64 | 6,68425E-62 |
| PLK1     | 4,158208573  | 6,042979209 | 8,73195E-64 | 1,80434E-61 |
| CCNB2    | 4,213338084  | 5,944756686 | 1,26712E-63 | 2,54133E-61 |
| ENG      | -2,612689411 | 7,276060561 | 1,41827E-62 | 2,7632E-60  |
| SIGLEC11 | -2,592971305 | 1,200401695 | 1,4953E-62  | 2,83235E-60 |
| RPS6KA2  | -2,78681683  | 6,102108166 | 4,54737E-61 | 8,38067E-59 |
| CDCA5    | 3,753015546  | 5,908293553 | 4,32131E-60 | 7,75448E-58 |
| C1orf198 | -1,691806302 | 6,792912984 | 6,83653E-58 | 1,19534E-55 |
| HYAL2    | -1,683257108 | 6,498144642 | 5,64746E-57 | 9,6275E-55  |
| RAPGEF2  | -2,075550638 | 5,110681345 | 5,81038E-57 | 9,66365E-55 |
| MYBL2    | 4,813616271  | 7,041937145 | 1,77259E-55 | 2,87793E-53 |
| PDK4     | -4,028611484 | 5,462531817 | 4,93407E-55 | 7,82451E-53 |
| UBE2C    | 4,594071903  | 6,366931735 | 7,3841E-55  | 1,14437E-52 |
| MAP3K3   | -1,634208289 | 5,50838368  | 9,95652E-55 | 1,50874E-52 |

|          |              |             |             |             |
|----------|--------------|-------------|-------------|-------------|
| PTPRM    | -2,671121497 | 5,435187316 | 5,31046E-54 | 7,87217E-52 |
| DLGAP5   | 4,043941074  | 5,274835205 | 5,47139E-54 | 7,93817E-52 |
| LRRK2    | -3,811126166 | 6,351589332 | 8,11079E-54 | 1,15224E-51 |
| MYADM    | -2,913794492 | 7,589082194 | 2,97106E-53 | 4,13462E-51 |
| CCNB1    | 3,72959281   | 6,604023952 | 5,88866E-53 | 8,03095E-51 |
| ADARB1   | -2,565562421 | 4,703926812 | 8,6923E-53  | 1,16221E-50 |
| AHCYL2   | -2,603605721 | 6,126176345 | 1,60171E-52 | 2,1004E-50  |
| C11orf9  | -3,518110233 | 4,440465274 | 4,09627E-52 | 5,27027E-50 |
| TTK      | 4,330302055  | 5,209224819 | 4,74201E-52 | 5,98811E-50 |
| UTRN     | -2,346150505 | 6,834785412 | 7,65832E-52 | 9,49492E-50 |
| SERINC1  | -1,490295377 | 7,942235256 | 1,13836E-51 | 1,38616E-49 |
| AK1      | -2,136018181 | 5,47525727  | 1,28951E-51 | 1,54266E-49 |
| GNAQ     | -1,711813819 | 6,589571282 | 2,90367E-51 | 3,41382E-49 |
| CCNA2    | 3,978544928  | 5,931568287 | 1,55716E-50 | 1,79971E-48 |
| DRAM1    | -2,50629352  | 6,559353595 | 2,48821E-50 | 2,82786E-48 |
| DOCK4    | -2,314813621 | 5,045606589 | 4,67471E-50 | 5,22571E-48 |
| CYBRD1   | -2,369819332 | 7,436291337 | 6,92925E-50 | 7,62105E-48 |
| NR4A3    | -3,647414857 | 4,587213633 | 1,59379E-49 | 1,72509E-47 |
| BUB1     | 3,175151929  | 5,715340793 | 7,27413E-49 | 7,75036E-47 |
| ZFP106   | -1,608785459 | 6,670720343 | 1,54106E-48 | 1,61669E-46 |
| CAT      | -1,96327542  | 7,026607273 | 1,74489E-48 | 1,80279E-46 |
| SLC9A3R2 | -2,310811852 | 5,841669383 | 3,86607E-48 | 3,93474E-46 |
| ARRB1    | -2,848223245 | 4,684270705 | 2,59941E-47 | 2,60667E-45 |
| RECK     | -2,241082247 | 3,912546142 | 2,91099E-47 | 2,87682E-45 |
| ATP11A   | -2,483010401 | 6,730545219 | 6,78844E-47 | 6,58925E-45 |
| ALOX5    | -2,92904518  | 5,620974898 | 6,86078E-47 | 6,58925E-45 |
| CALCOCO1 | -1,791879686 | 6,321546557 | 9,22088E-47 | 8,73294E-45 |
| ZFP36    | -2,733838944 | 8,23828155  | 1,01186E-46 | 9,45191E-45 |
| IL6ST    | -2,403923097 | 5,608459314 | 1,16198E-46 | 1,07075E-44 |
| KCTD12   | -2,143210441 | 7,023135088 | 1,66511E-46 | 1,51392E-44 |
| AQP1     | -3,517225686 | 8,719980304 | 5,3009E-46  | 4,75617E-44 |
| PPP1R15A | -2,084837933 | 7,059148945 | 6,09934E-46 | 5,40148E-44 |
| FAM82A2  | -1,372056537 | 5,902791814 | 7,85928E-46 | 6,87083E-44 |
| LATS2    | -1,832995018 | 4,973737422 | 2,15452E-45 | 1,85971E-43 |
| FAM105A  | -2,600387534 | 4,851426225 | 2,19582E-45 | 1,87166E-43 |
| CFD      | -2,841729991 | 4,780923517 | 3,45654E-45 | 2,90989E-43 |
| BTBD9    | -1,970711169 | 4,875301619 | 3,05243E-44 | 2,53836E-42 |
| KIF1C    | -1,74586627  | 7,268450738 | 5,2565E-44  | 4,31857E-42 |
| HSD17B4  | -1,406668052 | 7,026476278 | 7,60865E-44 | 6,17659E-42 |
| FLI1     | -2,415342799 | 4,78615596  | 8,12825E-44 | 6,52077E-42 |
| HBB      | -4,266512997 | 6,81720604  | 9,53621E-44 | 7,56133E-42 |
| GIMAP6   | -2,590436777 | 5,002363816 | 2,35055E-43 | 1,84234E-41 |
| NUSAP1   | 3,24435213   | 6,362265393 | 6,14849E-43 | 4,76438E-41 |
| BMPR2    | -1,694530339 | 7,133605102 | 6,93216E-43 | 5,31128E-41 |
| PNPLA6   | -1,680045409 | 6,446904102 | 2,77082E-42 | 2,09936E-40 |
| UBE2T    | 3,873744217  | 5,410800761 | 3,46757E-42 | 2,59839E-40 |
| EPB41L5  | -1,884604132 | 4,927485382 | 4,14497E-42 | 3,07223E-40 |
| RASL12   | -2,437623905 | 3,771775897 | 4,56666E-42 | 3,34839E-40 |
| CXCL16   | -1,906639162 | 7,016303535 | 6,71861E-42 | 4,87385E-40 |
| CCDC69   | -2,412093541 | 5,75943018  | 8,28739E-42 | 5,9486E-40  |

|          |              |             |             |             |
|----------|--------------|-------------|-------------|-------------|
| ZWINT    | 3,043355744  | 6,028228502 | 8,781E-42   | 6,23726E-40 |
| COLEC12  | -2,929446064 | 5,339178886 | 2,53823E-41 | 1,78435E-39 |
| RRM2     | 3,562615156  | 7,199606156 | 3,2538E-41  | 2,26405E-39 |
| ASAH1    | -1,823361163 | 8,075020935 | 6,36789E-41 | 4,38612E-39 |
| MYH10    | -2,402161395 | 7,077617112 | 9,6111E-41  | 6,55381E-39 |
| JUND     | -1,876210578 | 7,064293768 | 1,36075E-40 | 9,18705E-39 |
| TMEM204  | -2,229617429 | 4,052083377 | 1,81433E-40 | 1,21294E-38 |
| CDK1     | 3,43450866   | 6,638165292 | 3,09174E-40 | 2,04685E-38 |
| FYCO1    | -1,805333857 | 5,623453306 | 3,90682E-40 | 2,5616E-38  |
| CD83     | -2,332067839 | 5,429746537 | 3,9776E-40  | 2,58317E-38 |
| ZEB2     | -2,24688894  | 5,666273401 | 4,76265E-40 | 3,06382E-38 |
| GATA6    | -2,677161647 | 3,84330028  | 1,42116E-39 | 9,04364E-38 |
| RACGAP1  | 2,325540873  | 6,518872561 | 1,43234E-39 | 9,04364E-38 |
| ALOX5AP  | -2,836073356 | 5,686726582 | 1,49662E-39 | 9,36279E-38 |
| ZNF331   | -2,021463717 | 5,077793556 | 1,91201E-39 | 1,18527E-37 |
| KLF6     | -2,11241637  | 7,786760023 | 2,53061E-39 | 1,55462E-37 |
| UBL3     | -1,65902175  | 6,090302597 | 2,68194E-39 | 1,63287E-37 |
| SH3D19   | -1,698500593 | 6,288836904 | 6,10942E-39 | 3,6402E-37  |
| LAMB2    | -2,052436456 | 7,236718192 | 6,11851E-39 | 3,6402E-37  |
| SLC2A1   | 5,739727405  | 10,34111936 | 6,13906E-39 | 3,6402E-37  |
| TOP2A    | 3,764332465  | 7,912336268 | 1,12801E-38 | 6,63092E-37 |
| KIAA1524 | 3,055048289  | 4,909643702 | 1,84867E-38 | 1,07744E-36 |
| KAT2B    | -1,73137416  | 4,590690206 | 2,30958E-38 | 1,33466E-36 |
| SNX2     | -1,099179699 | 6,468510668 | 4,00673E-38 | 2,29596E-36 |
| NDST1    | -1,813212749 | 7,121459708 | 5,78757E-38 | 3,28879E-36 |
| HPCAL1   | -1,646967591 | 6,05382953  | 6,36591E-38 | 3,58753E-36 |
| PER1     | -2,195037446 | 6,374412401 | 1,11117E-37 | 6,21072E-36 |
| HMGA1    | 2,806080433  | 9,043670046 | 1,17699E-37 | 6,52511E-36 |
| INPP5K   | -1,178364906 | 5,726040662 | 1,19556E-37 | 6,5746E-36  |
| MCM4     | 2,679496276  | 7,515171569 | 1,30548E-37 | 7,12164E-36 |
| PTTG1    | 3,091485824  | 5,763707735 | 1,53615E-37 | 8,31351E-36 |
| NEDD9    | -2,342922694 | 7,337060808 | 2,05978E-37 | 1,10596E-35 |
| ARHGEF6  | -2,139928088 | 4,953521119 | 2,43082E-37 | 1,29498E-35 |
| ADCY9    | -1,902255085 | 5,443904113 | 4,90751E-37 | 2,59413E-35 |
| FAM188B  | -1,811789251 | 3,741027675 | 5,56417E-37 | 2,91862E-35 |
| SOCS3    | -2,221541063 | 7,922813021 | 1,229E-36   | 6,39737E-35 |
| TRAK2    | -1,471043421 | 6,007577803 | 3,442E-36   | 1,77811E-34 |
| UHRF1    | 3,536125251  | 5,929173186 | 5,36195E-36 | 2,74911E-34 |
| HELLS    | 3,026786819  | 4,233847149 | 5,59761E-36 | 2,84851E-34 |
| ADRB2    | -2,989624854 | 3,306839103 | 6,48994E-36 | 3,27814E-34 |
| KPNA2    | 2,39082152   | 8,067281057 | 7,71087E-36 | 3,86621E-34 |
| ASPM     | 3,849536368  | 5,448755045 | 7,9601E-36  | 3,96204E-34 |
| NEXN     | -2,410152737 | 3,766174145 | 8,17507E-36 | 4,03955E-34 |
| MBIP     | -1,751313116 | 5,316852767 | 8,36731E-36 | 4,1048E-34  |
| CD81     | -1,234748303 | 9,258416476 | 2,13817E-35 | 1,04144E-33 |
| SPTAN1   | -1,520560792 | 8,199008054 | 2,77152E-35 | 1,34035E-33 |
| MCL1     | -1,368701417 | 9,237689181 | 2,85063E-35 | 1,3689E-33  |
| DOK2     | -2,343857117 | 4,222893718 | 3,21123E-35 | 1,53128E-33 |
| ALDH2    | -2,206271983 | 7,796514035 | 5,61085E-35 | 2,65697E-33 |
| TK1      | 3,445754404  | 7,227139131 | 6,00269E-35 | 2,82292E-33 |

|           |              |             |             |             |
|-----------|--------------|-------------|-------------|-------------|
| AKAP12    | -2,765536343 | 5,689831259 | 6,20066E-35 | 2,89605E-33 |
| AFAP1L1   | -2,143420556 | 4,271023362 | 8,85488E-35 | 4,10758E-33 |
| ZEB1      | -1,98012535  | 4,936031654 | 1,72966E-34 | 7,96928E-33 |
| RAB27A    | -1,573673656 | 5,498069831 | 1,82482E-34 | 8,35129E-33 |
| HEG1      | -2,248228944 | 7,124484885 | 4,38128E-34 | 1,99173E-32 |
| DOCK11    | -2,111568365 | 4,839035068 | 4,48422E-34 | 2,02503E-32 |
| RFC4      | 3,426288798  | 6,236877135 | 9,32535E-34 | 4,18352E-32 |
| GORASP1   | -0,984139241 | 5,516026931 | 2,20848E-33 | 9,84291E-32 |
| CD52      | -2,709189177 | 5,731272501 | 2,56585E-33 | 1,13614E-31 |
| IFT57     | -1,648736504 | 6,29578025  | 3,04227E-33 | 1,3384E-31  |
| DUSP1     | -2,623495594 | 8,254677317 | 3,14914E-33 | 1,37654E-31 |
| TSPAN4    | -2,089199299 | 5,3576321   | 3,40909E-33 | 1,48067E-31 |
| FANCI     | 2,424236117  | 6,666816582 | 1,10798E-32 | 4,78185E-31 |
| NR4A2     | -2,746580449 | 4,801334291 | 1,32626E-32 | 5,68788E-31 |
| ARRB2     | -1,432946378 | 5,980564078 | 1,35166E-32 | 5,76062E-31 |
| DOCK9     | -1,846302283 | 6,598690976 | 1,63791E-32 | 6,93722E-31 |
| RASSF3    | -1,83607744  | 3,982556467 | 1,6725E-32  | 7,03999E-31 |
| SERPING1  | -2,077220242 | 8,649740888 | 1,73205E-32 | 7,2459E-31  |
| FERMT2    | -2,041274338 | 5,774834515 | 1,84359E-32 | 7,66551E-31 |
| ANKRD44   | -1,695386616 | 3,100511157 | 2,17493E-32 | 8,98839E-31 |
| DNA2      | 2,858296431  | 3,973126176 | 2,82792E-32 | 1,16166E-30 |
| SPAG5     | 3,191975311  | 5,888411194 | 4,00739E-32 | 1,63631E-30 |
| WWP2      | -1,143679847 | 6,216840718 | 4,19395E-32 | 1,7023E-30  |
| FNIP2     | -2,028635552 | 5,13706035  | 7,10564E-32 | 2,86706E-30 |
| JMJD1C    | -1,361669229 | 6,026747022 | 7,28124E-32 | 2,92064E-30 |
| UNC13B    | -2,076270204 | 6,304869208 | 8,27473E-32 | 3,29973E-30 |
| RPGR      | -1,470688415 | 3,517510828 | 9,61001E-32 | 3,80992E-30 |
| ARHGAP11A | 2,406562768  | 5,538482414 | 1,11227E-31 | 4,38415E-30 |
| IQSEC1    | -1,594674405 | 6,097150433 | 2,03866E-31 | 7,98944E-30 |
| UBE2S     | 3,009710524  | 7,123675078 | 2,08771E-31 | 8,13491E-30 |
| GINS2     | 3,771520892  | 5,212148276 | 2,15547E-31 | 8,35122E-30 |
| ZBTB4     | -1,408568188 | 6,873275908 | 2,47697E-31 | 9,54263E-30 |
| GNAI2     | -1,255647281 | 8,522819324 | 3,09622E-31 | 1,18613E-29 |
| ENPP2     | -2,279931157 | 6,196190576 | 3,19615E-31 | 1,21757E-29 |
| FOS       | -2,800924047 | 8,340118924 | 5,80575E-31 | 2,19941E-29 |
| MEIS3P1   | -1,685932406 | 4,918188481 | 7,68314E-31 | 2,89455E-29 |
| TGFBR3    | -2,340557233 | 5,257064752 | 8,03035E-31 | 3,00873E-29 |
| TBX2      | -2,230677309 | 4,898027627 | 8,98728E-31 | 3,34887E-29 |
| CENPH     | 2,348493198  | 4,535490371 | 9,83203E-31 | 3,64373E-29 |
| NR2F1     | -2,231085026 | 4,063656642 | 1,34023E-30 | 4,94003E-29 |
| UCK2      | 2,57382241   | 5,755225086 | 1,49446E-30 | 5,47888E-29 |
| SNX1      | -0,968554483 | 7,208791836 | 2,3134E-30  | 8,43588E-29 |
| LDLR      | -2,019955813 | 7,733701569 | 2,42434E-30 | 8,79341E-29 |
| NCF2      | -2,06895153  | 5,862504907 | 2,71905E-30 | 9,81016E-29 |
| FEN1      | 2,051609806  | 6,155554424 | 3,09008E-30 | 1,10901E-28 |
| CD33      | -2,036520199 | 2,891644443 | 3,40583E-30 | 1,21593E-28 |
| RAE1      | 1,549297937  | 6,210945817 | 3,53953E-30 | 1,25709E-28 |
| KCTD10    | -0,9558103   | 6,683405972 | 3,77888E-30 | 1,33514E-28 |
| SAMHD1    | -1,936308358 | 6,34781144  | 3,99807E-30 | 1,39987E-28 |
| PRELP     | -2,595269171 | 6,625482028 | 4,00315E-30 | 1,39987E-28 |

|          |              |             |             |             |
|----------|--------------|-------------|-------------|-------------|
| ITGA9    | -2,491570717 | 3,498087141 | 4,59511E-30 | 1,59868E-28 |
| PLSCR4   | -1,893563757 | 4,952771809 | 5,02826E-30 | 1,74049E-28 |
| ZC3H8    | 1,96353634   | 3,819289912 | 5,17228E-30 | 1,7813E-28  |
| KNTC1    | 2,168142336  | 5,474861666 | 5,49697E-30 | 1,88361E-28 |
| VASH1    | -1,791485388 | 5,25552595  | 6,19073E-30 | 2,11073E-28 |
| C10orf10 | -2,313393035 | 7,045849828 | 7,79242E-30 | 2,64361E-28 |
| APBB1    | -1,962955291 | 4,417793986 | 1,01602E-29 | 3,42981E-28 |
| CABLES1  | -2,377099124 | 4,436668329 | 1,05254E-29 | 3,53561E-28 |
| RBPMS    | -1,881266849 | 5,519187043 | 1,4181E-29  | 4,74019E-28 |
| ARHGAP29 | -2,388381652 | 5,619923456 | 1,57421E-29 | 5,23636E-28 |
| ITGA1    | -1,880063413 | 5,656528124 | 1,61832E-29 | 5,35696E-28 |
| NES      | -2,529240836 | 6,148092937 | 1,76219E-29 | 5,80502E-28 |
| SLCO2A1  | -2,929688087 | 6,133638113 | 2,06743E-29 | 6,77779E-28 |
| PTRF     | -2,015353726 | 8,4401163   | 2,16105E-29 | 7,0508E-28  |
| SEC22C   | -1,154615879 | 4,744444004 | 2,20094E-29 | 7,14676E-28 |
| RNF125   | -1,427611933 | 3,814789858 | 2,2552E-29  | 7,28826E-28 |
| SHMT2    | 1,970110226  | 7,857247084 | 2,28134E-29 | 7,33796E-28 |
| PAG1     | -1,879210882 | 5,081553311 | 2,81222E-29 | 9,00307E-28 |
| TJP1     | -1,436305094 | 7,092664305 | 4,08486E-29 | 1,30162E-27 |
| DBF4     | 2,16224231   | 5,192956755 | 6,36816E-29 | 2,01974E-27 |
| DYSF     | -2,232389811 | 5,332123125 | 6,50037E-29 | 2,05213E-27 |
| KIAA0101 | 3,266431607  | 5,371003602 | 8,32972E-29 | 2,61753E-27 |
| PLEKHO2  | -1,574768431 | 6,245417776 | 1,02978E-28 | 3,22115E-27 |
| CFL2     | -1,635433916 | 5,018827677 | 1,08545E-28 | 3,37976E-27 |
| SSH2     | -1,321295037 | 5,465665501 | 1,22914E-28 | 3,80978E-27 |
| ADAMTS1  | -2,563828348 | 6,788818669 | 1,26705E-28 | 3,9095E-27  |
| ARHGAP18 | -1,883921066 | 5,676808915 | 1,36203E-28 | 4,18363E-27 |
| LRRFIP1  | -1,374315786 | 7,354003629 | 1,43402E-28 | 4,38502E-27 |
| C7orf23  | -1,535153592 | 4,596431703 | 1,71343E-28 | 5,216E-27   |
| PFKFB2   | -1,350981452 | 5,469601075 | 2,01482E-28 | 6,10626E-27 |
| SDCBP    | -1,315002579 | 8,114947121 | 2,99868E-28 | 9,04779E-27 |
| C1orf112 | 2,022635634  | 4,687626437 | 3,72675E-28 | 1,1195E-26  |
| CISH     | -1,903554005 | 4,676911275 | 4,03264E-28 | 1,20608E-26 |
| ARID4A   | -1,188477885 | 4,554628021 | 5,43331E-28 | 1,61789E-26 |
| SIK2     | -1,320811673 | 5,582750862 | 5,97254E-28 | 1,77073E-26 |
| C15orf23 | 1,976000141  | 5,29703413  | 6,45718E-28 | 1,9056E-26  |
| LILRA6   | -1,823781295 | 3,754259808 | 6,48335E-28 | 1,9056E-26  |
| ARHGEF3  | -1,444883261 | 5,567348941 | 6,74721E-28 | 1,97464E-26 |
| C12orf49 | -1,342671086 | 5,823227924 | 7,22448E-28 | 2,10273E-26 |
| TK2      | -1,301708635 | 5,082388763 | 7,24654E-28 | 2,10273E-26 |
| ANO6     | -1,284589904 | 6,960731411 | 1,01457E-27 | 2,9315E-26  |
| DAPK1    | -2,279510175 | 5,996217244 | 1,18175E-27 | 3,40015E-26 |
| CRIM1    | -1,676879591 | 6,933407737 | 1,27632E-27 | 3,65681E-26 |
| MYO9A    | -1,513083453 | 4,322065877 | 1,31165E-27 | 3,74231E-26 |
| QSOX1    | -1,513687899 | 7,904367306 | 1,39843E-27 | 3,9733E-26  |
| MACF1    | -1,857008257 | 8,117441735 | 1,54173E-27 | 4,36226E-26 |
| PARD6B   | -1,707047451 | 4,199879501 | 1,62497E-27 | 4,57878E-26 |
| HLA-E    | -1,553657462 | 9,630487362 | 1,81602E-27 | 5,09607E-26 |
| GYPC     | -2,180966035 | 4,842918328 | 2,64167E-27 | 7,38259E-26 |
| TACC1    | -1,954454663 | 7,470292359 | 2,72338E-27 | 7,57989E-26 |



|              |              |             |             |             |
|--------------|--------------|-------------|-------------|-------------|
| NOD1         | -1,324769784 | 4,556172161 | 3,3275E-27  | 9,22365E-26 |
| RGS5         | -2,195542417 | 6,598468356 | 3,68663E-27 | 1,01778E-25 |
| CYP27A1      | -2,384797039 | 6,125733638 | 3,83711E-27 | 1,05505E-25 |
| MCM7         | 2,028296474  | 8,076950212 | 3,99412E-27 | 1,09381E-25 |
| RAB11FIP2    | -1,266785758 | 4,426140331 | 4,27726E-27 | 1,16666E-25 |
| UNG          | 1,678491496  | 6,63259221  | 4,29843E-27 | 1,16777E-25 |
| MRPL3        | 1,667428029  | 7,679383417 | 4,50177E-27 | 1,21816E-25 |
| HK3          | -2,381583039 | 4,077656238 | 5,29726E-27 | 1,42775E-25 |
| MTBP         | 1,913600702  | 3,611135589 | 5,93416E-27 | 1,59311E-25 |
| MPRIIP       | -1,395913438 | 6,709160115 | 6,34677E-27 | 1,6972E-25  |
| ARHGEF10     | -1,974506871 | 4,877137042 | 8,29134E-27 | 2,20854E-25 |
| DUSP3        | -1,052187784 | 6,808656102 | 9,93672E-27 | 2,63652E-25 |
| CD68         | -1,850829548 | 8,52765474  | 1,15488E-26 | 3,05237E-25 |
| SLC25A25     | -1,753361803 | 5,583880575 | 1,21129E-26 | 3,1891E-25  |
| SORT1        | -1,764286419 | 7,138047101 | 1,24726E-26 | 3,27119E-25 |
| CKAP2        | 1,996528035  | 6,137751089 | 1,25798E-26 | 3,28666E-25 |
| VAMP2        | -1,555680143 | 6,172715548 | 1,82267E-26 | 4,74381E-25 |
| HSD17B11     | -1,720389449 | 6,133726714 | 2,1526E-26  | 5,58122E-25 |
| SLCO2B1      | -2,3727431   | 6,700544887 | 2,26608E-26 | 5,85318E-25 |
| RNASEH2A     | 2,436646684  | 5,866803438 | 2,39462E-26 | 6,16186E-25 |
| DSP          | 3,677642672  | 10,33914664 | 2,69125E-26 | 6,89911E-25 |
| KIF18A       | 2,26058024   | 4,156497355 | 2,74316E-26 | 7,00585E-25 |
| LTBP2        | -2,190265004 | 7,968019739 | 4,3694E-26  | 1,10911E-24 |
| DDAH1        | -2,130189252 | 5,555187047 | 4,37528E-26 | 1,10911E-24 |
| C2           | -2,21728703  | 6,976321857 | 4,49793E-26 | 1,13598E-24 |
| NPC2         | -1,712034013 | 8,686856747 | 4,64544E-26 | 1,1689E-24  |
| EMILIN2      | -1,725443517 | 5,33198781  | 5,24223E-26 | 1,31422E-24 |
| ACP5         | -1,871537287 | 7,221521722 | 5,7905E-26  | 1,44635E-24 |
| USP54        | -1,458130631 | 5,889703821 | 6,27992E-26 | 1,56287E-24 |
| STAT5B       | -1,091336268 | 6,243695182 | 7,6562E-26  | 1,89401E-24 |
| RAB8B        | -1,40342644  | 5,595033267 | 7,66605E-26 | 1,89401E-24 |
| KDM6B        | -1,497792283 | 6,009698248 | 1,01448E-25 | 2,49737E-24 |
| ADD1         | -1,104526891 | 7,915280926 | 1,15149E-25 | 2,82446E-24 |
| TMEM110      | -1,065177637 | 3,55522451  | 1,18044E-25 | 2,88509E-24 |
| SNRPA1       | 1,604435719  | 6,106597362 | 1,50407E-25 | 3,66294E-24 |
| MFSD2A       | -2,259801995 | 5,407225179 | 1,54582E-25 | 3,75123E-24 |
| TGM2         | -2,396286439 | 8,812652887 | 1,73366E-25 | 4,19213E-24 |
| SMAD7        | -1,763892216 | 4,85778754  | 2,17712E-25 | 5,24585E-24 |
| DKC1         | 1,604097598  | 7,339292061 | 2,19099E-25 | 5,2607E-24  |
| PLXND1       | -1,747317461 | 7,107088175 | 2,2884E-25  | 5,4753E-24  |
| RPP40        | 2,007960242  | 3,59903722  | 2,34272E-25 | 5,58567E-24 |
| XPC          | -1,163240158 | 5,411104443 | 2,68471E-25 | 6,37875E-24 |
| DCP1A        | -0,855834953 | 5,261461299 | 2,99849E-25 | 7,09955E-24 |
| ITM2A        | -2,290922547 | 4,738988183 | 3,54851E-25 | 8,37277E-24 |
| LOC100129034 | -1,480865747 | 5,93718684  | 4,86069E-25 | 1,14293E-23 |
| MYD88        | -1,129907239 | 6,498823558 | 4,92538E-25 | 1,15416E-23 |
| CKS1B        | 2,701055885  | 7,317168001 | 4,99833E-25 | 1,16725E-23 |
| RCC1         | 1,793131507  | 5,528905607 | 5,15445E-25 | 1,1996E-23  |
| CYR61        | -2,282642693 | 7,663840808 | 5,26954E-25 | 1,22221E-23 |
| ACTL6A       | 2,499101102  | 7,845912107 | 5,6774E-25  | 1,31235E-23 |

|           |              |             |             |             |
|-----------|--------------|-------------|-------------|-------------|
| NCAPG2    | 2,043693953  | 5,765144085 | 6,1768E-25  | 1,42296E-23 |
| NRP1      | -1,779757093 | 6,977330899 | 6,35139E-25 | 1,45825E-23 |
| GGA2      | -1,128898618 | 7,180746848 | 6,47351E-25 | 1,4813E-23  |
| TIMP3     | -2,502815192 | 9,291230859 | 6,74215E-25 | 1,53762E-23 |
| PDCD6IP   | -0,882159315 | 7,331465771 | 8,37742E-25 | 1,90419E-23 |
| NUMB      | -0,9938256   | 6,596028413 | 8,64931E-25 | 1,95946E-23 |
| MTHFR     | -1,342691843 | 5,255962204 | 8,69555E-25 | 1,96341E-23 |
| STOM      | -1,556625966 | 8,646505699 | 1,17284E-24 | 2,63946E-23 |
| CARD8     | -1,3054494   | 4,918217939 | 1,33441E-24 | 2,99321E-23 |
| SPATS2    | 1,188345044  | 5,988837421 | 1,47453E-24 | 3,29666E-23 |
| C16orf88  | 1,480223595  | 4,958534282 | 1,68193E-24 | 3,74807E-23 |
| GAPDH     | 2,450211071  | 12,92261663 | 1,76102E-24 | 3,91154E-23 |
| CSE1L     | 1,398946188  | 7,85645868  | 1,78751E-24 | 3,95748E-23 |
| KIF13B    | -1,862694777 | 5,220582633 | 1,79549E-24 | 3,96227E-23 |
| PLCB2     | -1,843060852 | 4,417996009 | 1,96863E-24 | 4,33036E-23 |
| C5orf34   | 2,752569937  | 2,925384396 | 2,14597E-24 | 4,70526E-23 |
| SGOL2     | 2,053162874  | 4,398053708 | 2,15914E-24 | 4,71896E-23 |
| LTBP4     | -2,137478556 | 7,303645319 | 2,88905E-24 | 6,29407E-23 |
| HOXA5     | -1,972002878 | 2,472591967 | 3,05364E-24 | 6,63147E-23 |
| PCNA      | 1,884684427  | 7,842127897 | 3,31896E-24 | 7,18475E-23 |
| ARRDC2    | -1,391254584 | 5,174623808 | 3,9252E-24  | 8,47023E-23 |
| DENR      | 1,000098049  | 7,056328233 | 4,2895E-24  | 9,22716E-23 |
| ARHGEF17  | -1,686846304 | 5,666196009 | 4,41309E-24 | 9,46315E-23 |
| FANCD2    | 1,649308835  | 5,135535532 | 4,77968E-24 | 1,02171E-22 |
| POC1A     | 1,863437088  | 3,899770749 | 4,90548E-24 | 1,04533E-22 |
| USP53     | -1,307746324 | 5,277923278 | 4,92125E-24 | 1,04542E-22 |
| RAB11FIP1 | -2,087034469 | 7,893090503 | 5,55162E-24 | 1,17567E-22 |
| ANKS1A    | -1,267427033 | 6,008243108 | 5,73269E-24 | 1,21025E-22 |
| LAIR1     | -1,648826288 | 5,738776072 | 6,10079E-24 | 1,28399E-22 |
| CARD16    | -1,525655087 | 3,849110754 | 7,33772E-24 | 1,53957E-22 |
| RANBP1    | 1,8850205    | 7,410742073 | 1,12908E-23 | 2,36172E-22 |
| PTPRG     | -1,736532765 | 5,047266199 | 1,14087E-23 | 2,37907E-22 |
| DNAJC9    | 1,406190085  | 6,163331797 | 1,21823E-23 | 2,53267E-22 |
| PREX1     | -1,858800102 | 6,051539286 | 1,34132E-23 | 2,78008E-22 |
| CCL2      | -2,525292349 | 6,367237675 | 1,44372E-23 | 2,98325E-22 |
| COL13A1   | -2,220504459 | 2,403051382 | 1,50827E-23 | 3,10721E-22 |
| QKI       | -1,161924264 | 7,238896952 | 1,67814E-23 | 3,44676E-22 |
| HIP1      | -1,513799701 | 6,045564768 | 1,75404E-23 | 3,59182E-22 |
| KIAA0494  | -1,022632211 | 7,546728787 | 1,92438E-23 | 3,92885E-22 |
| AGTPBP1   | -1,201641956 | 4,782468472 | 2,03997E-23 | 4,1524E-22  |
| S100A4    | -2,029345611 | 7,131466648 | 2,16007E-23 | 4,38378E-22 |
| STK10     | -1,461792449 | 5,687515272 | 2,2231E-23  | 4,49832E-22 |
| MYO5C     | -1,858018204 | 5,09225341  | 2,38057E-23 | 4,8027E-22  |
| PRKAR1A   | -0,993837183 | 8,452723983 | 2,5299E-23  | 5,0889E-22  |
| MYO19     | 1,73118891   | 6,211653188 | 2,71128E-23 | 5,43771E-22 |
| ITGAL     | -2,107334308 | 5,434740656 | 3,58942E-23 | 7,17778E-22 |
| EGR1      | -2,253865259 | 8,404047884 | 3,87426E-23 | 7,72473E-22 |
| SLC6A8    | 4,150287139  | 8,616694771 | 4,49712E-23 | 8,94049E-22 |
| CPEB4     | -1,362314949 | 5,374944285 | 4,60352E-23 | 9,12541E-22 |
| SPARCL1   | -2,308627332 | 8,504167785 | 4,7428E-23  | 9,37425E-22 |

|          |              |             |             |             |
|----------|--------------|-------------|-------------|-------------|
| AHNAK    | -2,038379646 | 10,33877028 | 4,84615E-23 | 9,55083E-22 |
| VIM      | -1,924594743 | 10,12752778 | 5,44993E-23 | 1,07098E-21 |
| SASS6    | 1,552003961  | 3,626335388 | 5,95784E-23 | 1,16743E-21 |
| PMP22    | -1,718699102 | 6,68080021  | 6,09402E-23 | 1,19069E-21 |
| FOXP1    | -1,385673067 | 5,938625271 | 7,98586E-23 | 1,55587E-21 |
| H2AFX    | 2,086833214  | 6,397815588 | 8,46281E-23 | 1,6441E-21  |
| PPP1R14B | 1,941465989  | 7,515794651 | 1,01898E-22 | 1,97398E-21 |
| PAICS    | 2,020328953  | 7,970228179 | 1,09012E-22 | 2,10581E-21 |
| RHOA     | -0,86072069  | 9,38448038  | 1,45294E-22 | 2,79875E-21 |
| TBRG4    | 1,485330095  | 6,705114838 | 1,55E-22    | 2,9773E-21  |
| WDR75    | 1,184967208  | 6,217922015 | 1,68635E-22 | 3,23011E-21 |
| SACM1L   | -0,907780341 | 5,845490778 | 1,71907E-22 | 3,28356E-21 |
| SYNM     | -1,987822006 | 4,855663262 | 1,87131E-22 | 3,56438E-21 |
| GGCT     | 1,829045091  | 6,542113875 | 2,33065E-22 | 4,42693E-21 |
| POLR2H   | 2,217067735  | 6,905201778 | 2,39107E-22 | 4,52908E-21 |
| SLC7A7   | -1,9882118   | 5,490637239 | 2,48717E-22 | 4,69806E-21 |
| WDR12    | 1,641125501  | 5,571302814 | 2,51376E-22 | 4,73517E-21 |
| RYBP     | -0,997197462 | 5,929838789 | 2,7529E-22  | 5,17137E-21 |
| C10orf54 | -1,685617652 | 6,266026047 | 2,8339E-22  | 5,3089E-21  |
| XRCC2    | 1,96742872   | 3,538248403 | 3,54594E-22 | 6,62459E-21 |
| KCNAB2   | -1,57356787  | 4,855265148 | 3,86221E-22 | 7,19574E-21 |
| BRI3BP   | 1,833887717  | 3,662143744 | 3,9903E-22  | 7,41414E-21 |
| PJA2     | -1,094941039 | 7,202805987 | 4,81719E-22 | 8,9262E-21  |
| NICN1    | -1,112185459 | 3,847528619 | 5,07014E-22 | 9,36945E-21 |
| TYMS     | 2,462129537  | 6,127632095 | 5,09363E-22 | 9,38742E-21 |
| FLAD1    | 1,637621618  | 6,458892714 | 5,21607E-22 | 9,58716E-21 |
| MMP11    | 5,628721572  | 7,826560855 | 6,26706E-22 | 1,14879E-20 |
| TSC22D3  | -1,789700125 | 7,728692346 | 7,34453E-22 | 1,34269E-20 |
| ZFP64    | 1,421321921  | 5,600423607 | 7,72283E-22 | 1,40807E-20 |
| CYP4V2   | -1,234149708 | 4,888752188 | 1,13382E-21 | 2,06175E-20 |
| TRIB1    | -1,795301923 | 6,68316538  | 1,13956E-21 | 2,06667E-20 |
| BTG2     | -1,589572724 | 7,762768007 | 1,29448E-21 | 2,34139E-20 |
| TMEM2    | -1,698870922 | 6,721749843 | 1,41993E-21 | 2,56151E-20 |
| PTGIS    | -2,072964161 | 5,306552488 | 1,82646E-21 | 3,28618E-20 |
| TMEM69   | 1,136823973  | 5,492989595 | 1,95891E-21 | 3,5152E-20  |
| FIGNL1   | 1,881102136  | 5,114655739 | 1,97604E-21 | 3,53665E-20 |
| EPS15    | -0,79608436  | 6,549614988 | 2,04068E-21 | 3,64278E-20 |
| CCT3     | 1,319273694  | 8,942842808 | 2,1958E-21  | 3,90944E-20 |
| CCDC58   | 2,248798278  | 5,017363139 | 2,30734E-21 | 4,09733E-20 |
| RAPGEF6  | -1,253338223 | 3,865312477 | 2,3965E-21  | 4,23362E-20 |
| RBMS3    | -1,924747249 | 2,296603136 | 2,3965E-21  | 4,23362E-20 |
| DOCK2    | -2,043706367 | 5,282882078 | 2,42222E-21 | 4,268E-20   |
| CENPN    | 1,734090887  | 5,642612907 | 2,48996E-21 | 4,37604E-20 |
| GMPS     | 1,830079022  | 7,605212224 | 2,63481E-21 | 4,61871E-20 |
| SRPK1    | 1,381393651  | 6,965414775 | 2,91072E-21 | 5,08928E-20 |
| CCDC86   | 1,358709878  | 5,805131962 | 2,93389E-21 | 5,11668E-20 |
| ZNF438   | -1,127036986 | 3,707852703 | 3,05266E-21 | 5,31023E-20 |
| FAM190B  | -0,965034425 | 6,006948683 | 3,07812E-21 | 5,34089E-20 |
| CHTF18   | 2,524698436  | 4,617306442 | 4,27442E-21 | 7,39779E-20 |
| PCYOX1   | -1,151837813 | 7,452116724 | 5,06699E-21 | 8,74729E-20 |

|          |              |             |             |             |
|----------|--------------|-------------|-------------|-------------|
| ALAS1    | -0,917135675 | 6,28051487  | 5,21935E-21 | 8,98756E-20 |
| NPM3     | 2,42723002   | 5,827574216 | 5,3047E-21  | 9,11153E-20 |
| ARAP3    | -1,596355503 | 4,659298713 | 5,7138E-21  | 9,78489E-20 |
| FCHO2    | -1,27232005  | 5,54632683  | 5,72543E-21 | 9,78489E-20 |
| FEM1C    | -1,112771896 | 5,417199061 | 6,5994E-21  | 1,12503E-19 |
| APBB2    | -1,48924222  | 5,641549776 | 6,90051E-21 | 1,17343E-19 |
| THOC3    | 2,328176522  | 6,671983495 | 7,02589E-21 | 1,19178E-19 |
| RFC2     | 1,365784496  | 6,178168024 | 7,36838E-21 | 1,24677E-19 |
| FKBP4    | 2,07250939   | 8,398377513 | 8,06736E-21 | 1,36167E-19 |
| ANKRD28  | -1,037579118 | 5,808645844 | 8,10298E-21 | 1,3643E-19  |
| FCGRT    | -1,441267368 | 7,206420081 | 8,72714E-21 | 1,46577E-19 |
| APLP2    | -1,250001855 | 9,95595263  | 8,83627E-21 | 1,48046E-19 |
| C1orf131 | 1,528808383  | 4,63016242  | 9,21949E-21 | 1,54088E-19 |
| CGN      | -2,159490499 | 5,805833375 | 1,01164E-20 | 1,68664E-19 |
| TXNIP    | -1,823830572 | 9,242565084 | 1,20528E-20 | 2,00459E-19 |
| KIAA0355 | -1,117239996 | 5,432216435 | 1,25967E-20 | 2,08994E-19 |
| PDE4D    | -1,623804833 | 5,285693601 | 1,34642E-20 | 2,22846E-19 |
| VPS13C   | -1,17863819  | 6,182635552 | 1,45048E-20 | 2,39487E-19 |
| MYO1F    | -1,815072194 | 5,109338894 | 1,53896E-20 | 2,53483E-19 |
| CTSH     | -1,996046811 | 8,535169575 | 1,56304E-20 | 2,5645E-19  |
| ZNFX1    | -1,275408394 | 6,739991877 | 1,5645E-20  | 2,5645E-19  |
| UACA     | -1,334142228 | 5,87796367  | 1,60592E-20 | 2,62608E-19 |
| CREBL2   | -1,02695768  | 6,313327588 | 1,64238E-20 | 2,67928E-19 |
| RSRC1    | 1,59137152   | 5,562409465 | 1,71398E-20 | 2,78941E-19 |
| TNS3     | -1,851811215 | 7,24703534  | 1,75062E-20 | 2,84226E-19 |
| AFF1     | -1,253802682 | 6,382297802 | 1,79953E-20 | 2,91473E-19 |
| RGL1     | -1,547056183 | 5,625221215 | 1,80408E-20 | 2,91516E-19 |
| FAM13B   | -1,215248245 | 4,962914723 | 1,88573E-20 | 3,03991E-19 |
| LMCD1    | -1,628030953 | 5,497687823 | 1,89162E-20 | 3,0422E-19  |
| MCM6     | 1,591355419  | 6,817003342 | 1,93886E-20 | 3,11085E-19 |
| CCT5     | 1,728797149  | 9,239253456 | 2,00954E-20 | 3,21668E-19 |
| MLLT4    | -1,173421983 | 6,795772545 | 2,22116E-20 | 3,5471E-19  |
| PGAM5    | 1,500213217  | 5,918608272 | 2,61944E-20 | 4,17336E-19 |
| RUVBL1   | 1,516971306  | 7,010928255 | 2,8303E-20  | 4,4988E-19  |
| RIN3     | -1,54309911  | 5,205595734 | 2,86155E-20 | 4,53789E-19 |
| TPI1     | 1,681836792  | 10,50058162 | 2,86959E-20 | 4,53789E-19 |
| PYCR1    | 2,844953856  | 7,076569857 | 2,87486E-20 | 4,53789E-19 |
| TLN1     | -1,523013796 | 8,847815948 | 3,16631E-20 | 4,98639E-19 |
| LAMA4    | -1,861131267 | 6,414449345 | 3,26811E-20 | 5,13484E-19 |
| IP6K1    | -0,759332438 | 5,94948425  | 3,32199E-20 | 5,20751E-19 |
| IFITM2   | -1,751384214 | 7,202283803 | 3,556E-20   | 5,56155E-19 |
| POP7     | 1,493545144  | 5,578092025 | 3,6168E-20  | 5,64369E-19 |
| PDK1     | 2,201559408  | 6,384745318 | 3,96679E-20 | 6,1757E-19  |
| DTL      | 2,195110942  | 5,451443023 | 4,10963E-20 | 6,38351E-19 |
| NUP155   | 1,687610589  | 6,270915478 | 4,3964E-20  | 6,81342E-19 |
| DENND5A  | -1,148992328 | 6,533762562 | 5,79331E-20 | 8,95795E-19 |
| EZH1     | -1,098345595 | 5,042575425 | 6,30371E-20 | 9,72487E-19 |
| SEC14L1  | -1,291043749 | 7,214199313 | 6,31781E-20 | 9,72487E-19 |
| KRT17    | 6,872941924  | 11,78115879 | 6,79453E-20 | 1,04351E-18 |
| DCAF13   | 1,426683884  | 6,521896342 | 6,97378E-20 | 1,06863E-18 |

|           |              |             |             |             |
|-----------|--------------|-------------|-------------|-------------|
| KIAA1109  | -1,327098283 | 5,802527267 | 7,69243E-20 | 1,17611E-18 |
| HERC1     | -1,204264798 | 6,019212967 | 8,33212E-20 | 1,27107E-18 |
| SNHG1     | 2,210252013  | 6,2244366   | 8,61418E-20 | 1,31116E-18 |
| IL1R1     | -1,622005648 | 7,237688667 | 8,73176E-20 | 1,3261E-18  |
| TPP1      | -1,151648202 | 8,109526106 | 8,76038E-20 | 1,32749E-18 |
| MXD4      | -1,196332248 | 6,149969774 | 9,02547E-20 | 1,36463E-18 |
| PPM1D     | -1,010955158 | 4,379427746 | 1,01303E-19 | 1,52828E-18 |
| PIK3R5    | -1,991359512 | 4,133444141 | 1,01594E-19 | 1,52929E-18 |
| ARAP1     | -1,128782077 | 7,218519783 | 1,01992E-19 | 1,5319E-18  |
| AKAP11    | -0,97834172  | 5,982009632 | 1,02598E-19 | 1,53762E-18 |
| HIPK1     | -1,106172188 | 6,676328771 | 1,06472E-19 | 1,59218E-18 |
| MTMR14    | -0,881731381 | 5,588090155 | 1,06758E-19 | 1,59296E-18 |
| CYBB      | -2,115923356 | 7,011246435 | 1,17072E-19 | 1,74305E-18 |
| NIPSNAP1  | 1,602450083  | 7,340442353 | 1,1799E-19  | 1,75288E-18 |
| ENPP4     | -2,026729618 | 4,901784858 | 1,24354E-19 | 1,84341E-18 |
| NUP37     | 1,406341884  | 5,373650765 | 1,25967E-19 | 1,86128E-18 |
| MRPL47    | 1,763813146  | 6,526212029 | 1,26105E-19 | 1,86128E-18 |
| TLR4      | -2,037467884 | 5,090450139 | 1,33994E-19 | 1,97345E-18 |
| MTIF2     | 1,158962726  | 6,069552442 | 1,6105E-19  | 2,36681E-18 |
| USP12     | -1,067775699 | 4,428873999 | 1,84336E-19 | 2,7032E-18  |
| NBEAL1    | -1,449094088 | 3,268202231 | 1,86409E-19 | 2,72773E-18 |
| DAB2      | -1,783963899 | 6,482333339 | 1,87314E-19 | 2,73511E-18 |
| GAS6      | -1,686405096 | 7,143294759 | 1,88601E-19 | 2,74801E-18 |
| PLEKHM3   | -1,14678511  | 4,671988387 | 2,45198E-19 | 3,56504E-18 |
| ZMYND19   | 1,517561784  | 4,942639434 | 2,50578E-19 | 3,63552E-18 |
| LOC728554 | 2,350426632  | 6,012439118 | 2,63206E-19 | 3,81061E-18 |
| NFKBIA    | -1,58887248  | 8,078037709 | 2,83653E-19 | 4,09794E-18 |
| CSF1      | -1,790526859 | 5,297796342 | 2,95842E-19 | 4,265E-18   |
| IL7R      | -2,309312169 | 4,862083317 | 3,22403E-19 | 4,63812E-18 |
| ZCCHC24   | -1,719476981 | 5,042721987 | 3,41458E-19 | 4,90189E-18 |
| BRIX1     | 1,733402357  | 6,568159565 | 3,55176E-19 | 5,08813E-18 |
| RCC2      | 1,445218363  | 8,481229053 | 3,60926E-19 | 5,15966E-18 |
| PFN2      | 3,449006055  | 8,849431192 | 3,7252E-19  | 5,31425E-18 |
| NR3C1     | -1,115638911 | 6,681637889 | 3,88577E-19 | 5,53175E-18 |
| JAK1      | -1,08422155  | 7,707631589 | 4,37982E-19 | 6,22208E-18 |
| MYL9      | -1,807358691 | 7,90326457  | 4,52095E-19 | 6,40923E-18 |
| BCL2L12   | 1,582811274  | 4,827696226 | 4,6381E-19  | 6,56167E-18 |
| SAP30L    | -1,048219928 | 5,313309209 | 4,89206E-19 | 6,90661E-18 |
| BOP1      | 1,924665092  | 5,797438281 | 4,95313E-19 | 6,97839E-18 |
| DTYMK     | 1,905993087  | 5,726388846 | 4,98773E-19 | 7,00304E-18 |
| SLC15A3   | -1,838607788 | 5,860364439 | 4,99117E-19 | 7,00304E-18 |
| TMEM48    | 1,402414226  | 5,191103624 | 5,2586E-19  | 7,36312E-18 |
| XPOT      | 1,552489535  | 7,880474877 | 5,77547E-19 | 8,07027E-18 |
| ERGIC1    | -0,92726552  | 7,62118152  | 5,81056E-19 | 8,1027E-18  |
| FHOD1     | -1,422018389 | 5,134697842 | 5,89618E-19 | 8,20532E-18 |
| PRPF19    | 0,981351349  | 7,832306436 | 5,91695E-19 | 8,21745E-18 |
| TTC28     | -1,646369073 | 5,158179397 | 6,49402E-19 | 9,00056E-18 |
| SLC25A30  | -1,008202457 | 4,364928909 | 6,62673E-19 | 9,16585E-18 |
| SAMD4A    | -1,841952854 | 4,713282645 | 6,87736E-19 | 9,49326E-18 |
| DSG2      | 2,256301679  | 8,942952154 | 7,03496E-19 | 9,6912E-18  |

|           |              |             |             |             |
|-----------|--------------|-------------|-------------|-------------|
| RASIP1    | -2,25414171  | 4,198757223 | 7,11692E-19 | 9,78433E-18 |
| CAV2      | -1,690606825 | 7,395538426 | 8,79326E-19 | 1,20646E-17 |
| C11orf84  | 1,344410083  | 5,557148499 | 8,86205E-19 | 1,21346E-17 |
| HN1       | 1,748952917  | 7,708165256 | 9,92607E-19 | 1,35643E-17 |
| MEMO1     | 1,367579687  | 6,228187863 | 1,01461E-18 | 1,38373E-17 |
| B3GALNT2  | 1,166550688  | 6,185519225 | 1,06606E-18 | 1,45099E-17 |
| LOC440173 | 4,180782512  | 3,603173405 | 1,08542E-18 | 1,4744E-17  |
| CYB5A     | -1,765251413 | 6,906982443 | 1,09927E-18 | 1,49025E-17 |
| EXOSC5    | 1,874902192  | 5,285696205 | 1,11726E-18 | 1,51163E-17 |
| CAMTA2    | -1,041096039 | 5,601072511 | 1,12233E-18 | 1,51548E-17 |
| TUBA1C    | 1,409121967  | 9,75386402  | 1,17497E-18 | 1,58342E-17 |
| DCUN1D5   | 1,724399603  | 5,928319665 | 1,31112E-18 | 1,76342E-17 |
| TARS      | 1,465507529  | 7,809401093 | 1,48035E-18 | 1,98406E-17 |
| ARNTL2    | 3,371400124  | 5,594127182 | 1,48099E-18 | 1,98406E-17 |
| TRAP1     | 1,395280063  | 7,19670118  | 1,53234E-18 | 2,04883E-17 |
| ANKRD13A  | -0,835012354 | 6,231997865 | 1,5631E-18  | 2,08587E-17 |
| PTPN1     | -0,94225342  | 7,129200898 | 1,60432E-18 | 2,13669E-17 |
| LPCAT1    | -2,207259604 | 8,190102186 | 1,72248E-18 | 2,28959E-17 |
| MRPL36    | 1,777474055  | 5,586267996 | 1,73263E-18 | 2,2986E-17  |
| B4GALT2   | 1,292728369  | 6,53773227  | 1,88182E-18 | 2,49168E-17 |
| SYNJ1     | -1,137849755 | 4,084507453 | 1,89169E-18 | 2,49989E-17 |
| ARHGEF2   | -1,17919192  | 6,526001389 | 1,986E-18   | 2,61945E-17 |
| SLC16A1   | 2,494645645  | 7,2359965   | 2,33432E-18 | 3,07291E-17 |
| CSRP1     | -1,255730201 | 8,338569495 | 2,4136E-18  | 3,17116E-17 |
| HSPE1     | 1,740443228  | 7,647859855 | 2,56833E-18 | 3,36797E-17 |
| YWHAZ     | 1,122015206  | 11,050303   | 2,67739E-18 | 3,50424E-17 |
| HPRT1     | 1,641281788  | 6,408543955 | 2,95917E-18 | 3,86563E-17 |
| ITSN2     | -0,918339255 | 6,127292747 | 3,06253E-18 | 3,993E-17   |
| ALDH18A1  | 1,06724831   | 7,053889133 | 3,07733E-18 | 4,00464E-17 |
| PROS1     | -1,799055493 | 6,077859582 | 3,816E-18   | 4,95644E-17 |
| LY75      | -1,642802122 | 6,2000037   | 3,87459E-18 | 5,02297E-17 |
| TFB2M     | 1,403230267  | 5,227004398 | 4,00673E-18 | 5,18442E-17 |
| HLA-DPB1  | -1,841991779 | 8,502449555 | 4,97195E-18 | 6,42116E-17 |
| NCAPD2    | 1,879539495  | 7,827207471 | 5,14551E-18 | 6,63275E-17 |
| OLA1      | 1,451538047  | 7,492294565 | 5,91927E-18 | 7,61575E-17 |
| CFLAR     | -1,141100032 | 6,627368324 | 6,75403E-18 | 8,6734E-17  |
| MAP4      | -1,093108873 | 8,212924658 | 7,25721E-18 | 9,30205E-17 |
| SNRPD1    | 1,411327201  | 6,555044289 | 7,95542E-18 | 1,01779E-16 |
| MRPL30    | 1,089570702  | 6,303176344 | 8,07728E-18 | 1,03144E-16 |
| DCUN1D3   | -1,20275671  | 3,910842811 | 8,41183E-18 | 1,07215E-16 |
| MOAP1     | -1,014662779 | 5,269832858 | 8,58625E-18 | 1,09234E-16 |
| GAS7      | -1,75353323  | 5,597187332 | 9,19447E-18 | 1,16754E-16 |
| ANKFY1    | -0,991579199 | 6,426130566 | 9,26867E-18 | 1,17478E-16 |
| PNPLA2    | -1,282138997 | 5,880216279 | 9,29714E-18 | 1,1762E-16  |
| STXBP1    | -1,682423607 | 5,712009675 | 9,55264E-18 | 1,20629E-16 |
| SORD      | 2,136405604  | 6,920124656 | 9,73425E-18 | 1,22695E-16 |
| GIT2      | -0,771684955 | 5,893827289 | 1,12939E-17 | 1,4209E-16  |
| HLA-DMA   | -1,771607374 | 6,896457905 | 1,19457E-17 | 1,50015E-16 |
| EZR       | -1,100619857 | 9,135647768 | 1,23026E-17 | 1,54212E-16 |
| PTPLAD2   | -1,592907202 | 4,644050744 | 1,31394E-17 | 1,64399E-16 |

|          |              |             |             |             |
|----------|--------------|-------------|-------------|-------------|
| HLX      | -1,543227006 | 3,369231434 | 1,47005E-17 | 1,83594E-16 |
| HSPD1    | 1,462115898  | 9,354672705 | 1,67452E-17 | 2,08749E-16 |
| CCDC138  | 1,975577019  | 3,217201297 | 1,85133E-17 | 2,30368E-16 |
| LRP1     | -1,642988189 | 8,994439492 | 1,89135E-17 | 2,3492E-16  |
| PSMD14   | 1,304381492  | 7,290705052 | 2,02016E-17 | 2,50463E-16 |
| RNF130   | -0,958092066 | 6,62131012  | 2,12234E-17 | 2,62654E-16 |
| SNRPE    | 1,401117686  | 6,644685606 | 2,23739E-17 | 2,76391E-16 |
| LIN9     | 1,652554523  | 4,256223966 | 2,33431E-17 | 2,87842E-16 |
| CTNNA1   | -0,783075982 | 8,877618676 | 2,35824E-17 | 2,90268E-16 |
| DCHS1    | -1,842352458 | 5,171458639 | 2,44132E-17 | 2,99953E-16 |
| CD74     | -1,799685661 | 11,66125554 | 2,47407E-17 | 3,03429E-16 |
| PALB2    | 1,062653212  | 4,797666094 | 3,21642E-17 | 3,93766E-16 |
| ILF2     | 1,226981074  | 8,688043268 | 3,33115E-17 | 4,0708E-16  |
| LYSMD3   | -1,087577919 | 4,908583088 | 3,69427E-17 | 4,50648E-16 |
| ACAA1    | -0,926280884 | 5,785269366 | 3,74368E-17 | 4,55859E-16 |
| HDGF     | 1,122157466  | 9,236981894 | 3,84206E-17 | 4,67005E-16 |
| EHD1     | -1,32583255  | 6,473577986 | 4,09107E-17 | 4,96388E-16 |
| LPIN2    | -1,530355299 | 5,89198462  | 4,10095E-17 | 4,96703E-16 |
| MTX2     | 1,099037124  | 5,890826621 | 4,14734E-17 | 5,01431E-16 |
| INCENP   | 1,54567322   | 5,428131032 | 4,21736E-17 | 5,08994E-16 |
| TDP1     | 1,072901386  | 4,894505479 | 4,25758E-17 | 5,12941E-16 |
| TWF1     | 1,305507526  | 7,838873527 | 4,39574E-17 | 5,28652E-16 |
| AHCY     | 1,771462217  | 8,853384161 | 4,51866E-17 | 5,42478E-16 |
| SH3BGRL  | -1,312367196 | 7,076955632 | 4,5301E-17  | 5,42896E-16 |
| RHOB     | -1,64189341  | 8,02011022  | 4,7771E-17  | 5,71492E-16 |
| KIAA0232 | -1,060759385 | 5,693037765 | 5,07403E-17 | 6,05951E-16 |
| SLC16A4  | -1,875985172 | 3,692932265 | 5,13969E-17 | 6,12719E-16 |
| INTS8    | 1,152764355  | 6,077410275 | 5,16325E-17 | 6,14453E-16 |
| BZW2     | 1,535844024  | 7,451802897 | 5,20519E-17 | 6,18366E-16 |
| SHFM1    | 1,507571469  | 7,295398305 | 5,32443E-17 | 6,31431E-16 |
| MTERFD1  | 1,292898038  | 5,124186675 | 5,81993E-17 | 6,88995E-16 |
| MTHFD2   | 2,056974107  | 7,671718579 | 6,04055E-17 | 7,13874E-16 |
| SRD5A1   | 2,278253663  | 5,312771148 | 6,06344E-17 | 7,14914E-16 |
| TOMM40   | 1,275905527  | 7,014044056 | 6,07104E-17 | 7,14914E-16 |
| TDG      | 1,218679017  | 6,254786962 | 6,08081E-17 | 7,14914E-16 |
| GGH      | 2,81448426   | 6,533456727 | 6,12249E-17 | 7,18576E-16 |
| PIIF     | 1,704394924  | 7,447343881 | 6,20371E-17 | 7,249E-16   |
| PAK1     | 1,728586451  | 7,552992511 | 6,20664E-17 | 7,249E-16   |
| TH1L     | 1,265675474  | 7,217204724 | 6,20827E-17 | 7,249E-16   |
| TSPAN3   | -0,982033007 | 8,270384415 | 6,21899E-17 | 7,24912E-16 |
| ACSL4    | -1,485460442 | 7,096387058 | 6,59161E-17 | 7,67034E-16 |
| CHAF1A   | 1,94756831   | 5,511694668 | 6,6282E-17  | 7,69977E-16 |
| UMPS     | 1,281134413  | 6,142340549 | 6,69787E-17 | 7,76748E-16 |
| EIF4EBP1 | 3,024157642  | 7,171131266 | 6,95677E-17 | 8,05402E-16 |
| MRPL12   | 1,871911636  | 6,278521833 | 7,03664E-17 | 8,13268E-16 |
| PRMT3    | 1,5156908    | 5,117955267 | 7,18506E-17 | 8,29017E-16 |
| VRK1     | 1,489325504  | 5,009601488 | 7,25438E-17 | 8,35602E-16 |
| SIAH2    | 1,968065271  | 7,013393298 | 7,33997E-17 | 8,44034E-16 |
| NINJ2    | -1,912829891 | 3,472754128 | 7,4616E-17  | 8,56577E-16 |
| JUP      | 2,011678719  | 10,80244363 | 7,77999E-17 | 8,91626E-16 |

|          |              |             |             |             |
|----------|--------------|-------------|-------------|-------------|
| PRKCD    | -1,032481173 | 6,233627196 | 8,14099E-17 | 9,31433E-16 |
| ARHGDIB  | -1,469629124 | 7,662212508 | 8,45714E-17 | 9,65984E-16 |
| MCAM     | -1,52524477  | 7,037774973 | 8,56153E-17 | 9,76272E-16 |
| RAN      | 1,338001078  | 9,232354916 | 8,84546E-17 | 1,00697E-15 |
| PKD2     | -1,065213124 | 5,356392211 | 8,91506E-17 | 1,0132E-15  |
| HN1L     | 1,161138725  | 7,82537502  | 9,13195E-17 | 1,03607E-15 |
| PA2G4P4  | 1,1823227    | 0,885863689 | 9,14674E-17 | 1,03607E-15 |
| MARS     | 1,01286256   | 7,677531128 | 9,56091E-17 | 1,08119E-15 |
| THBS1    | -1,862059201 | 9,023065429 | 9,89519E-17 | 1,11714E-15 |
| SLC43A2  | -1,340362312 | 5,5201605   | 1,02591E-16 | 1,15631E-15 |
| SSX2IP   | 1,474148529  | 5,395105532 | 1,03102E-16 | 1,16016E-15 |
| FAM136A  | 1,307079966  | 6,131937964 | 1,08963E-16 | 1,22409E-15 |
| POLD2    | 1,248712057  | 7,449179207 | 1,09474E-16 | 1,22781E-15 |
| LRRC8C   | -1,276138709 | 5,129986972 | 1,11005E-16 | 1,24293E-15 |
| FRYL     | -1,047882113 | 5,852358351 | 1,12438E-16 | 1,25691E-15 |
| DOCK6    | -1,134868861 | 5,830751095 | 1,14398E-16 | 1,27673E-15 |
| LRFN4    | 1,829329497  | 4,832306373 | 1,20315E-16 | 1,34057E-15 |
| DUSP6    | -1,881578208 | 7,241903708 | 1,24469E-16 | 1,38459E-15 |
| MPEG1    | -1,759177861 | 5,924719764 | 1,26131E-16 | 1,4008E-15  |
| TMEM170B | -1,502233889 | 3,578247403 | 1,27227E-16 | 1,41067E-15 |
| APC      | -1,102819119 | 5,213479541 | 1,31279E-16 | 1,45199E-15 |
| GNS      | -0,998176756 | 8,238652818 | 1,31379E-16 | 1,45199E-15 |
| ALAD     | -0,912777785 | 5,740729623 | 1,39848E-16 | 1,54308E-15 |
| DDX11    | 1,844975138  | 5,572976502 | 1,47959E-16 | 1,62994E-15 |
| ITGA7    | -1,701026201 | 3,203371275 | 1,74454E-16 | 1,91871E-15 |
| SNRPB    | 1,590876032  | 8,390514482 | 2,02966E-16 | 2,2287E-15  |
| PINK1    | -1,057842403 | 6,09700749  | 2,08345E-16 | 2,28409E-15 |
| RMI1     | 1,574983742  | 4,925019583 | 2,33402E-16 | 2,55159E-15 |
| MDH2     | 1,002194439  | 8,435538301 | 2,33494E-16 | 2,55159E-15 |
| LMNB2    | 1,752210421  | 7,501977397 | 2,41096E-16 | 2,63046E-15 |
| TAOK3    | -1,027680088 | 5,541030099 | 2,43515E-16 | 2,6526E-15  |
| TMTC3    | 1,618636952  | 6,813746974 | 2,44117E-16 | 2,65492E-15 |
| PPP1R15B | -0,806693867 | 7,079633429 | 2,52983E-16 | 2,74696E-15 |
| BDH2     | -1,191249137 | 4,837069633 | 2,53924E-16 | 2,7528E-15  |
| RALGAPA2 | -1,610141462 | 4,965673341 | 2,63784E-16 | 2,85514E-15 |
| TOPBP1   | 1,426315992  | 6,689032485 | 2,6625E-16  | 2,87727E-15 |
| FANCE    | 1,881223187  | 5,119907705 | 2,86937E-16 | 3,09592E-15 |
| MRPS30   | 1,499728951  | 5,730372448 | 2,96611E-16 | 3,19525E-15 |
| TCP11L2  | -1,11889667  | 3,737328168 | 2,99753E-16 | 3,224E-15   |
| MCM5     | 1,532478586  | 7,193248331 | 3,0137E-16  | 3,23629E-15 |
| SLC25A39 | 1,304071681  | 7,930181596 | 3,12365E-16 | 3,34908E-15 |
| BUB3     | 1,0646638    | 7,150261577 | 3,14919E-16 | 3,37117E-15 |
| TFPI     | -2,047457197 | 6,913669077 | 3,19499E-16 | 3,41484E-15 |
| XRCC3    | 1,769268848  | 5,074989464 | 3,20767E-16 | 3,42302E-15 |
| CLCN2    | 2,369795297  | 4,138149269 | 3,39991E-16 | 3,6225E-15  |
| S100A2   | 6,550335075  | 9,796299156 | 3,48478E-16 | 3,70713E-15 |
| EHD2     | -1,754470255 | 7,525529342 | 3,65021E-16 | 3,87707E-15 |
| CRISPLD2 | -1,774764686 | 6,562907009 | 3,82477E-16 | 4,05616E-15 |
| SORBS3   | -1,095975637 | 6,718505677 | 3,89202E-16 | 4,12107E-15 |
| ASNS     | 2,556448023  | 6,703605401 | 3,90364E-16 | 4,12696E-15 |



|         |              |             |             |             |
|---------|--------------|-------------|-------------|-------------|
| CCT7    | 1,014851055  | 8,780201006 | 4,04112E-16 | 4,2657E-15  |
| MRPL37  | 1,062688954  | 6,936558467 | 4,16322E-16 | 4,38779E-15 |
| BOLA3   | 1,673839995  | 4,930190861 | 4,2476E-16  | 4,46981E-15 |
| SH3RF1  | -1,094079085 | 5,378559301 | 4,41515E-16 | 4,63897E-15 |
| HDAC2   | 1,162254946  | 7,634109665 | 4,75347E-16 | 4,98675E-15 |
| RFC3    | 1,482784011  | 4,989148504 | 4,7852E-16  | 5,01233E-15 |
| ZZEF1   | -1,078493115 | 5,957070423 | 4,83641E-16 | 5,0582E-15  |
| RCAN1   | -1,46517221  | 6,247127006 | 4,92444E-16 | 5,14238E-15 |
| ABCC5   | 3,627877347  | 8,555494434 | 5,15654E-16 | 5,37652E-15 |
| GRN     | -1,122059245 | 9,55818006  | 5,18992E-16 | 5,40307E-15 |
| PDCD5   | 1,54846507   | 6,429902586 | 5,23801E-16 | 5,44482E-15 |
| STAT5A  | -1,340289874 | 5,415564982 | 5,65394E-16 | 5,86822E-15 |
| MSN     | -1,29997198  | 9,817723308 | 6,25026E-16 | 6,47728E-15 |
| ZNF692  | 1,656199514  | 4,711738996 | 6,56474E-16 | 6,79286E-15 |
| SMUG1   | 1,188674523  | 5,558612159 | 6,74478E-16 | 6,96859E-15 |
| NOL11   | 1,049836041  | 6,582520901 | 6,86851E-16 | 7,08568E-15 |
| METAP1  | 1,259102991  | 6,973813103 | 7,04882E-16 | 7,26071E-15 |
| C1QA    | -1,856637978 | 7,937947394 | 7,61795E-16 | 7,83511E-15 |
| LMNB1   | 1,683625865  | 6,37328149  | 7,92033E-16 | 8,13102E-15 |
| DNAJB11 | 1,482055099  | 7,610326382 | 7,9295E-16  | 8,13102E-15 |
| TMEM164 | -1,199299657 | 5,721505977 | 8,09394E-16 | 8,28717E-15 |
| NOL10   | 0,994219212  | 5,954144852 | 8,44019E-16 | 8,62874E-15 |
| TUBG1   | 1,205815756  | 6,241071442 | 8,65021E-16 | 8,81734E-15 |
| SKI     | -1,107387187 | 6,871190443 | 8,65053E-16 | 8,81734E-15 |
| CTSD    | -1,281572999 | 10,62349264 | 8,8196E-16  | 8,97624E-15 |
| ANXA6   | -1,535066681 | 7,143814257 | 9,25912E-16 | 9,40953E-15 |
| ANAPC7  | 1,03255754   | 6,665269144 | 9,35333E-16 | 9,49113E-15 |
| TAOK2   | -1,002946961 | 6,121461338 | 9,49873E-16 | 9,62435E-15 |
| CTGF    | -1,837695181 | 7,980010826 | 9,77379E-16 | 9,88835E-15 |
| MYO1B   | -1,263003626 | 7,693044264 | 1,01785E-15 | 1,02826E-14 |
| SLC44A2 | -1,194546076 | 7,960484234 | 1,08282E-15 | 1,09227E-14 |
| CRLS1   | -1,017302109 | 6,15979291  | 1,10049E-15 | 1,10846E-14 |
| GCC2    | -0,869100983 | 5,368276049 | 1,10428E-15 | 1,11064E-14 |
| DHCR24  | -1,357931517 | 9,78707391  | 1,14527E-15 | 1,15016E-14 |
| NR2C2AP | 1,586718666  | 5,320896725 | 1,17631E-15 | 1,1796E-14  |
| LNX2    | -1,020888064 | 5,555845898 | 1,17884E-15 | 1,1804E-14  |
| TOM1L2  | -1,352805224 | 6,035342408 | 1,2089E-15  | 1,20872E-14 |
| LYSMD1  | 1,293373936  | 4,270456022 | 1,30628E-15 | 1,30417E-14 |
| CDK17   | -0,806691913 | 5,427557295 | 1,3468E-15  | 1,34266E-14 |
| VPS13D  | -1,15833436  | 6,31955505  | 1,38145E-15 | 1,3752E-14  |
| MPP5    | -0,939569155 | 5,474644115 | 1,4135E-15  | 1,40505E-14 |
| MRAS    | -1,553185483 | 4,779535733 | 1,60583E-15 | 1,59391E-14 |
| TRANK1  | -1,422993148 | 5,106711155 | 1,61424E-15 | 1,59993E-14 |
| REEP5   | -0,887231407 | 7,413058144 | 1,62167E-15 | 1,60496E-14 |
| POLA2   | 1,297605327  | 5,402993894 | 1,68399E-15 | 1,66423E-14 |
| FAM60A  | 1,75814598   | 7,798587507 | 1,7319E-15  | 1,70909E-14 |
| FMNL1   | -1,465968784 | 5,563266435 | 1,84588E-15 | 1,81894E-14 |
| ITGAX   | -1,629397275 | 5,599218704 | 1,85576E-15 | 1,82604E-14 |
| MFN1    | 1,551582512  | 6,706523504 | 1,93658E-15 | 1,90282E-14 |
| USP39   | 1,0413558    | 7,063375947 | 1,96245E-15 | 1,92546E-14 |

|          |              |             |             |             |
|----------|--------------|-------------|-------------|-------------|
| CYC1     | 1,727027866  | 7,98504063  | 1,98494E-15 | 1,94473E-14 |
| GART     | 1,034438454  | 6,951464853 | 2,029E-15   | 1,98504E-14 |
| H2AFZ    | 1,464057712  | 8,49088138  | 2,04136E-15 | 1,99253E-14 |
| PIK3C2B  | -1,138401829 | 5,374485245 | 2,0425E-15  | 1,99253E-14 |
| DSN1     | 1,335634323  | 5,317157174 | 2,21681E-15 | 2,15949E-14 |
| APBB1IP  | -1,663397411 | 4,188636354 | 2,25714E-15 | 2,19564E-14 |
| SLC35A4  | -0,734712168 | 6,681586666 | 2,29491E-15 | 2,2292E-14  |
| LSM4     | 1,464648482  | 7,342476482 | 2,3468E-15  | 2,27636E-14 |
| PRIM1    | 1,526212172  | 4,438981681 | 2,38353E-15 | 2,30871E-14 |
| MBNL2    | -1,14316627  | 6,194628732 | 2,40237E-15 | 2,32365E-14 |
| FBXO5    | 1,555334774  | 4,342802926 | 2,43161E-15 | 2,34861E-14 |
| NUP85    | 1,082331059  | 5,979179509 | 2,47832E-15 | 2,39034E-14 |
| PTPN6    | -0,901596173 | 6,543473203 | 2,55494E-15 | 2,46075E-14 |
| PAK1IP1  | 1,160311992  | 5,415121157 | 2,5778E-15  | 2,47927E-14 |
| C6orf89  | -0,717126193 | 7,063120241 | 2,6E-15     | 2,4971E-14  |
| RGS2     | -1,756143316 | 6,409307898 | 2,69044E-15 | 2,58032E-14 |
| VAT1     | -1,188011833 | 7,892502266 | 2,757E-15   | 2,64044E-14 |
| EMP3     | -1,531608952 | 5,675842848 | 2,79023E-15 | 2,66852E-14 |
| FAM162A  | 2,111395445  | 7,244231841 | 2,85691E-15 | 2,72847E-14 |
| EPB41L2  | -1,398473357 | 6,330747744 | 2,86706E-15 | 2,73433E-14 |
| CYGB     | -1,296022266 | 4,490102865 | 3,02171E-15 | 2,8778E-14  |
| FANCG    | 1,930356758  | 5,310007438 | 3,19589E-15 | 3,03944E-14 |
| MEF2A    | -0,875741014 | 6,358472833 | 3,22784E-15 | 3,06555E-14 |
| SPATA6   | -1,490135388 | 2,092476404 | 3,78896E-15 | 3,59346E-14 |
| THOP1    | 1,178476209  | 5,813555437 | 3,86671E-15 | 3,66209E-14 |
| YARS2    | 1,140152214  | 5,022826783 | 4,22264E-15 | 3,99364E-14 |
| PSMD2    | 1,612600631  | 9,614657855 | 4,47997E-15 | 4,23115E-14 |
| PACSIN2  | -0,919136268 | 6,265688046 | 5,20457E-15 | 4,90871E-14 |
| RASSF8   | -1,624980634 | 4,984095253 | 5,21191E-15 | 4,90884E-14 |
| SMC4     | 1,576651265  | 7,608682789 | 5,29368E-15 | 4,97898E-14 |
| IFI30    | -1,4865959   | 7,665258834 | 5,46941E-15 | 5,13718E-14 |
| CDK4     | 1,668483332  | 8,328441891 | 5,55107E-15 | 5,20671E-14 |
| FCGR3A   | -1,782004524 | 7,405085762 | 5,55898E-15 | 5,20697E-14 |
| TTF2     | 1,38997574   | 5,317997504 | 5,5872E-15  | 5,22622E-14 |
| SFXN3    | -1,245136321 | 5,650018685 | 5,75311E-15 | 5,37403E-14 |
| TXNDC11  | -0,981944614 | 6,595524643 | 5,77955E-15 | 5,39135E-14 |
| ZYG11B   | -0,679554655 | 5,628443455 | 5,83029E-15 | 5,43125E-14 |
| MTFR1    | 1,526679048  | 5,851469213 | 5,89158E-15 | 5,48086E-14 |
| ARHGEF12 | -1,011555606 | 7,73979366  | 5,91064E-15 | 5,49109E-14 |
| SPRED1   | -1,02479255  | 6,369876125 | 6,04672E-15 | 5,60987E-14 |
| WDR43    | 1,016127532  | 6,725410409 | 6,4179E-15  | 5,94615E-14 |
| GPI      | 1,789309655  | 9,812702508 | 6,76112E-15 | 6,25564E-14 |
| PBXIP1   | -1,058937649 | 7,199910467 | 6,97182E-15 | 6,44185E-14 |
| HDAC7    | -0,969859511 | 6,475122634 | 7,07243E-15 | 6,52597E-14 |
| NAA50    | 1,228540592  | 8,387831491 | 7,27865E-15 | 6,70718E-14 |
| SRPRB    | 1,34998912   | 7,447296403 | 7,49238E-15 | 6,89481E-14 |
| TYROBP   | -1,706497835 | 6,578583882 | 7,74455E-15 | 7,11726E-14 |
| ZC3H7A   | -0,681434856 | 5,704474689 | 7,88208E-15 | 7,22881E-14 |
| STIP1    | 0,990119412  | 8,236800111 | 7,88713E-15 | 7,22881E-14 |
| LSM12    | 0,914409341  | 6,86690901  | 7,93053E-15 | 7,25883E-14 |

|          |              |             |             |             |
|----------|--------------|-------------|-------------|-------------|
| PMAIP1   | 2,470673816  | 5,581253282 | 8,06821E-15 | 7,37495E-14 |
| ARHGAP17 | -0,78440112  | 5,878451765 | 8,56915E-15 | 7,82236E-14 |
| ELMO1    | -1,489726772 | 5,238297981 | 9,12345E-15 | 8,31722E-14 |
| C11orf83 | 1,687272703  | 4,941305585 | 9,49605E-15 | 8,64534E-14 |
| DUSP8    | -1,635774866 | 3,808582874 | 9,53715E-15 | 8,67118E-14 |
| TMEM133  | -1,317749365 | 2,249357103 | 9,60766E-15 | 8,72366E-14 |
| MPHOSPH9 | 1,227300527  | 4,324522993 | 1,00177E-14 | 9,08387E-14 |
| SMARCB1  | 1,035095758  | 7,234671282 | 1,10676E-14 | 1,00226E-13 |
| NUP43    | 0,966576619  | 5,873060012 | 1,11794E-14 | 1,01104E-13 |
| CPOX     | 1,496854201  | 5,603945146 | 1,13869E-14 | 1,02844E-13 |
| SLC17A5  | -0,930127745 | 5,116489303 | 1,16419E-14 | 1,05008E-13 |
| SH3BP1   | 1,47573457   | 6,594145002 | 1,16872E-14 | 1,05278E-13 |
| C1QB     | -1,830035342 | 8,365882493 | 1,17664E-14 | 1,05851E-13 |
| CCT4     | 1,650794798  | 8,9222646   | 1,19334E-14 | 1,07212E-13 |
| MRPL51   | 1,216078154  | 7,212256583 | 1,22575E-14 | 1,09979E-13 |
| RSU1     | -0,909783721 | 6,451868225 | 1,28817E-14 | 1,15427E-13 |
| WDR19    | -1,017510557 | 4,16460689  | 1,39473E-14 | 1,24811E-13 |
| NDUFS6   | 1,498934798  | 6,637126398 | 1,43719E-14 | 1,2829E-13  |
| NOP56    | 1,301001758  | 7,713622658 | 1,43736E-14 | 1,2829E-13  |
| GLRX3    | 1,599399766  | 7,077812181 | 1,4774E-14  | 1,31614E-13 |
| GPC1     | 2,840961628  | 8,860144291 | 1,47846E-14 | 1,31614E-13 |
| CKS2     | 2,075295062  | 6,061395997 | 1,59477E-14 | 1,41783E-13 |
| CEP72    | 1,806685742  | 3,470969855 | 1,67086E-14 | 1,48354E-13 |
| TMEM14A  | 1,95805347   | 6,210860039 | 1,75369E-14 | 1,55506E-13 |
| TMEM189  | 1,316505123  | 7,205406694 | 1,76487E-14 | 1,56294E-13 |
| INPP5A   | -0,902520638 | 5,185615968 | 2,05147E-14 | 1,81439E-13 |
| IQGAP2   | -1,696087569 | 4,508655182 | 2,07894E-14 | 1,8363E-13  |
| TYSND1   | 1,468904171  | 5,694387798 | 2,12773E-14 | 1,87697E-13 |
| AXL      | -1,551549615 | 6,340709162 | 2,17514E-14 | 1,91632E-13 |
| OBFC1    | -1,099599585 | 5,284365852 | 2,47024E-14 | 2,17349E-13 |
| SESTD1   | -1,191343098 | 5,781897078 | 2,47454E-14 | 2,17447E-13 |
| PLOD2    | 2,039972694  | 7,613032925 | 2,53746E-14 | 2,22689E-13 |
| HSDL2    | -1,014603816 | 5,938288648 | 2,67514E-14 | 2,3447E-13  |
| ANPEP    | -1,819494239 | 5,268058904 | 2,68301E-14 | 2,34557E-13 |
| FZD5     | -1,530045548 | 5,098339285 | 2,68302E-14 | 2,34557E-13 |
| DDR1     | 1,507391665  | 9,178223218 | 2,76237E-14 | 2,41186E-13 |
| AIMP2    | 1,170446205  | 5,401882263 | 2,93149E-14 | 2,55624E-13 |
| NOP2     | 1,402098271  | 6,454513198 | 2,93949E-14 | 2,55995E-13 |
| TCF3     | 1,344594007  | 7,000709292 | 2,95759E-14 | 2,57243E-13 |
| NIPAL3   | -0,92126663  | 5,808693216 | 3,07901E-14 | 2,67462E-13 |
| POLR2D   | 0,996990142  | 5,91027601  | 3,08429E-14 | 2,6758E-13  |
| ANXA5    | -1,007228552 | 8,678336053 | 3,20454E-14 | 2,77659E-13 |
| MRTO4    | 1,184681328  | 6,471014756 | 3,28768E-14 | 2,84501E-13 |
| SCP2     | -0,725860407 | 7,085588801 | 3,32506E-14 | 2,87371E-13 |
| RANGAP1  | 1,18300686   | 7,769370914 | 3,38648E-14 | 2,92309E-13 |
| TMEM63B  | -0,968082396 | 6,799011572 | 3,4119E-14  | 2,94131E-13 |
| HLA-DRB1 | -1,814448107 | 9,738627125 | 3,56653E-14 | 3,07073E-13 |
| GPSM3    | -1,398077781 | 5,263832702 | 3,75633E-14 | 3,23006E-13 |
| PUS1     | 1,287307123  | 4,994204195 | 3,83504E-14 | 3,29359E-13 |
| FCER1G   | -1,594804858 | 6,195697688 | 3,8492E-14  | 3,3016E-13  |

|           |              |             |             |             |
|-----------|--------------|-------------|-------------|-------------|
| PCM1      | -1,028372561 | 6,788536171 | 3,94698E-14 | 3,38121E-13 |
| MAZ       | 1,081662391  | 8,087344397 | 3,96072E-14 | 3,38873E-13 |
| FBXO32    | 2,51143281   | 5,526101235 | 3,98887E-14 | 3,40854E-13 |
| NOB1      | 1,006728465  | 6,49752406  | 4,26141E-14 | 3,63686E-13 |
| STAMBP    | 0,940613841  | 6,098871806 | 4,35327E-14 | 3,71062E-13 |
| CASP3     | 1,022061514  | 6,030782571 | 4,41725E-14 | 3,76046E-13 |
| EHD4      | -0,960246779 | 6,497085981 | 4,76372E-14 | 4,05035E-13 |
| NIT2      | 1,594055311  | 6,354736805 | 4,78404E-14 | 4,06256E-13 |
| KLHL2     | -0,954462957 | 4,973414384 | 4,90273E-14 | 4,15817E-13 |
| CPSF6     | 0,677924691  | 6,791082866 | 4,9716E-14  | 4,21135E-13 |
| BIN2      | -1,600528943 | 4,029240221 | 5,03678E-14 | 4,26127E-13 |
| MRPL9     | 0,989469515  | 6,285578165 | 5,16243E-14 | 4,36216E-13 |
| CD151     | -1,129342601 | 8,104139031 | 5,69384E-14 | 4,80524E-13 |
| FSCN1     | 2,404470215  | 8,965207504 | 5,71562E-14 | 4,81765E-13 |
| GPN1      | 1,120206404  | 6,739111486 | 5,7572E-14  | 4,84671E-13 |
| LAPTM5    | -1,561789196 | 8,707533299 | 5,8776E-14  | 4,94197E-13 |
| TPCN1     | -1,159936045 | 5,704021174 | 5,91249E-14 | 4,96518E-13 |
| SETX      | -0,895008464 | 6,692854538 | 6,01321E-14 | 5,04355E-13 |
| PSMD11    | 1,358107013  | 7,391977338 | 6,23848E-14 | 5,22607E-13 |
| C2orf29   | 0,87461969   | 6,523365026 | 6,2938E-14  | 5,26594E-13 |
| HPS5      | -0,881009191 | 5,684236456 | 6,34566E-14 | 5,30282E-13 |
| CBX3      | 1,108889588  | 8,144623369 | 6,4809E-14  | 5,40921E-13 |
| CACYBP    | 1,356702116  | 7,375770011 | 6,67866E-14 | 5,56746E-13 |
| LIG1      | 1,355713464  | 5,819989776 | 6,70166E-14 | 5,5798E-13  |
| MSH6      | 1,35197758   | 7,291741352 | 6,71393E-14 | 5,5832E-13  |
| RPP21     | 1,422550309  | 4,59515952  | 6,80721E-14 | 5,65388E-13 |
| KLF10     | -1,178363479 | 6,946428997 | 6,86769E-14 | 5,69717E-13 |
| LSG1      | 1,504950899  | 7,183041092 | 6,95018E-14 | 5,7586E-13  |
| TUBB      | 1,08983169   | 10,75928466 | 7,23381E-14 | 5,98633E-13 |
| PTS       | 1,66523653   | 5,072215633 | 8,1006E-14  | 6,69551E-13 |
| IFNAR1    | -0,72124279  | 6,677062273 | 8,42189E-14 | 6,95265E-13 |
| SNRPA     | 0,91030618   | 6,415353535 | 8,89539E-14 | 7,33466E-13 |
| RUSC1     | 1,071032455  | 6,163785564 | 8,93702E-14 | 7,36009E-13 |
| EGR2      | -1,701594328 | 4,916441306 | 9,1022E-14  | 7,48708E-13 |
| SLC25A20  | -1,127518081 | 4,123328391 | 9,15707E-14 | 7,52314E-13 |
| MSI2      | 1,722612112  | 5,302730849 | 9,46519E-14 | 7,76692E-13 |
| METTL1    | 1,297306143  | 5,243402356 | 9,48517E-14 | 7,77396E-13 |
| CECR5     | 1,372408719  | 6,254624584 | 9,64572E-14 | 7,89606E-13 |
| SLC25A17  | 0,954289788  | 5,548235585 | 9,68441E-14 | 7,91822E-13 |
| SWAP70    | -0,990425129 | 6,738099373 | 9,78936E-14 | 7,99445E-13 |
| XPO1      | 1,08177427   | 8,445984935 | 9,89942E-14 | 8,07466E-13 |
| PTGER4    | -1,554660704 | 4,742057948 | 1,01762E-13 | 8,29051E-13 |
| HDAC1     | 1,076278437  | 7,947245968 | 1,02473E-13 | 8,33849E-13 |
| LOC152217 | 1,668851986  | 5,304920304 | 1,05312E-13 | 8,55925E-13 |
| MAPK6     | 1,469683904  | 7,442792267 | 1,08254E-13 | 8,78787E-13 |
| SF3B14    | 1,063095343  | 6,669966401 | 1,09379E-13 | 8,86046E-13 |
| XPO5      | 1,154111314  | 6,801550912 | 1,09408E-13 | 8,86046E-13 |
| KLF13     | -1,292657215 | 7,248392116 | 1,12643E-13 | 9,11162E-13 |
| MECP2     | -0,751867182 | 6,066627886 | 1,15097E-13 | 9,29913E-13 |
| RRM1      | 1,363991362  | 7,248170223 | 1,16444E-13 | 9,3968E-13  |

|          |              |             |             |             |
|----------|--------------|-------------|-------------|-------------|
| NCBP2    | 1,193662925  | 7,630517027 | 1,18846E-13 | 9,57933E-13 |
| MPHOSPH8 | -0,828387098 | 5,53756298  | 1,21606E-13 | 9,79021E-13 |
| ARRDC3   | -1,309748288 | 7,482988975 | 1,22836E-13 | 9,87755E-13 |
| R3HDM1   | 1,031826199  | 5,937077434 | 1,23531E-13 | 9,92177E-13 |
| FIBIN    | -2,019232315 | 4,158118181 | 1,31874E-13 | 1,05794E-12 |
| TSSC1    | 1,038582507  | 5,695787098 | 1,32901E-13 | 1,06492E-12 |
| DDX49    | 1,12836802   | 6,340299729 | 1,34419E-13 | 1,07582E-12 |
| DDX56    | 0,894319977  | 6,804594198 | 1,37521E-13 | 1,09937E-12 |
| MAGOHB   | 1,415395908  | 4,782539672 | 1,45593E-13 | 1,16252E-12 |
| HNRNPL   | 0,645568051  | 8,940493314 | 1,4662E-13  | 1,16936E-12 |
| INTS7    | 1,061734062  | 5,807340772 | 1,5439E-13  | 1,22989E-12 |
| NFKBIZ   | -1,843974279 | 5,936277531 | 1,65105E-13 | 1,31371E-12 |
| MFSD7    | -1,490075228 | 2,880607532 | 1,66915E-13 | 1,32656E-12 |
| MRPL42   | 1,099244601  | 6,181970152 | 1,73047E-13 | 1,3737E-12  |
| PSMB4    | 1,083879087  | 8,54162022  | 1,74555E-13 | 1,38406E-12 |
| ZMYND11  | -0,814408467 | 6,591857925 | 1,81751E-13 | 1,43944E-12 |
| UTP14C   | -0,716824656 | 5,639210865 | 1,82106E-13 | 1,44058E-12 |
| KCTD1    | 2,592421282  | 6,299313517 | 1,86216E-13 | 1,47139E-12 |
| COIL     | 0,927078262  | 5,430589207 | 1,89198E-13 | 1,49322E-12 |
| SGPL1    | 0,989694728  | 7,514473475 | 1,89593E-13 | 1,49407E-12 |
| SAC3D1   | 1,362818371  | 4,008341445 | 1,89744E-13 | 1,49407E-12 |
| EXOSC2   | 1,007865341  | 5,46870964  | 1,92291E-13 | 1,51238E-12 |
| SFXN4    | 1,355609833  | 5,0716022   | 1,95803E-13 | 1,53823E-12 |
| POLR3GL  | -0,804535124 | 4,826926115 | 1,99046E-13 | 1,5619E-12  |
| USP25    | -0,975664559 | 5,807838745 | 2,00295E-13 | 1,5699E-12  |
| PNRC2    | -0,772975535 | 6,917701569 | 2,01567E-13 | 1,57806E-12 |
| TBCEL    | -0,896048929 | 4,499137457 | 2,04425E-13 | 1,5986E-12  |
| TP53BP2  | -0,774085853 | 6,245342983 | 2,07531E-13 | 1,62102E-12 |
| SUCLG2   | -0,778034002 | 5,990511698 | 2,08713E-13 | 1,62839E-12 |
| CARM1    | 1,001510259  | 6,711408967 | 2,09627E-13 | 1,63366E-12 |
| AZI2     | -0,748561114 | 5,673161293 | 2,10874E-13 | 1,64149E-12 |
| PARVG    | -1,475737137 | 4,347879318 | 2,15185E-13 | 1,67314E-12 |
| ETV1     | -1,811506276 | 5,537512164 | 2,19751E-13 | 1,7067E-12  |
| EFEMP1   | -1,855306541 | 7,402655431 | 2,24875E-13 | 1,74451E-12 |
| SPP1     | 4,295782927  | 10,65368841 | 2,41364E-13 | 1,8703E-12  |
| EDEM1    | -1,073547546 | 7,068262771 | 2,43743E-13 | 1,88659E-12 |
| TOR1AIP1 | -0,683370125 | 6,63736902  | 2,45139E-13 | 1,89524E-12 |
| LSM7     | 1,36424685   | 5,794678293 | 2,52657E-13 | 1,95115E-12 |
| MASTL    | 1,240143068  | 5,042686177 | 2,60286E-13 | 2,0078E-12  |
| KIAA0754 | -1,70428262  | 3,119946222 | 2,78994E-13 | 2,14967E-12 |
| PRMT1    | 1,135246219  | 7,925897112 | 2,82063E-13 | 2,17087E-12 |
| WDYHV1   | 1,214383875  | 4,496252062 | 2,91546E-13 | 2,24132E-12 |
| PDE3B    | -1,230837884 | 4,609070675 | 2,94255E-13 | 2,2596E-12  |
| HMGB3    | 2,484532603  | 7,545114185 | 2,98958E-13 | 2,29313E-12 |
| IL18R1   | -1,644393731 | 2,95360338  | 3,09406E-13 | 2,3706E-12  |
| PSMD12   | 0,918754353  | 6,405716245 | 3,1241E-13  | 2,38975E-12 |
| ARL6IP5  | -1,135865305 | 7,439117061 | 3,12605E-13 | 2,38975E-12 |
| FAM21A   | -0,859039178 | 5,337079453 | 3,19327E-13 | 2,4384E-12  |
| SNRPD2   | 1,414996127  | 8,152485376 | 3,209E-13   | 2,44767E-12 |
| RHOU     | -1,586578055 | 5,052745461 | 3,26094E-13 | 2,4845E-12  |

|          |              |             |             |             |
|----------|--------------|-------------|-------------|-------------|
| CDK2     | 0,988234264  | 6,109173931 | 3,34132E-13 | 2,54291E-12 |
| RDX      | -0,918588291 | 7,208305051 | 3,38879E-13 | 2,57616E-12 |
| CCT6A    | 1,472812071  | 8,786102973 | 3,49896E-13 | 2,65695E-12 |
| RC3H1    | -0,626228818 | 5,495776562 | 3,60128E-13 | 2,73161E-12 |
| CSNK2A1  | 0,991323078  | 7,314107438 | 3,67471E-13 | 2,7842E-12  |
| GSS      | 1,070950876  | 6,645840429 | 3,75228E-13 | 2,83982E-12 |
| GTF2IRD1 | 1,22135569   | 5,75873371  | 3,77343E-13 | 2,85027E-12 |
| DARS2    | 1,279995687  | 5,871381896 | 3,77445E-13 | 2,85027E-12 |
| NFIX     | -1,518280711 | 6,689893225 | 3,91739E-13 | 2,95494E-12 |
| HMGXB4   | 0,939974763  | 5,91684664  | 4,13187E-13 | 3,11328E-12 |
| TPD52    | 1,389456198  | 7,678804019 | 4,40181E-13 | 3,31302E-12 |
| DCTPP1   | 1,702900176  | 6,496684467 | 4,62685E-13 | 3,47702E-12 |
| ILK      | -0,863310069 | 7,018489605 | 4,62991E-13 | 3,47702E-12 |
| LRRC42   | 1,023849364  | 5,886049512 | 4,69564E-13 | 3,52251E-12 |
| NDUFB4   | 1,381476275  | 7,30181277  | 4,86669E-13 | 3,64425E-12 |
| AMOTL2   | -1,272643337 | 6,253440314 | 4,86861E-13 | 3,64425E-12 |
| FBXW11   | -0,730399904 | 6,003874507 | 4,97879E-13 | 3,72263E-12 |
| NISCH    | -0,910178504 | 6,187160999 | 5,03407E-13 | 3,75984E-12 |
| EIF3B    | 1,023944919  | 8,506942492 | 5,13992E-13 | 3,8347E-12  |
| FAM103A1 | 1,030625727  | 5,528736366 | 5,38349E-13 | 4,01202E-12 |
| UNC119   | 1,260070818  | 5,710917513 | 5,40929E-13 | 4,02685E-12 |
| EED      | 1,021028471  | 5,063686479 | 5,4562E-13  | 4,05734E-12 |
| SUSD1    | -1,082344653 | 4,426262183 | 5,87727E-13 | 4,3657E-12  |
| PRCC     | 0,784325832  | 6,851178943 | 5,95675E-13 | 4,41992E-12 |
| PHF6     | 0,908335121  | 5,83267954  | 6,1969E-13  | 4,59311E-12 |
| ATF7     | -0,655375467 | 6,201064263 | 6,25124E-13 | 4,62836E-12 |
| DYRK3    | -1,314376747 | 3,525661027 | 6,53961E-13 | 4,83662E-12 |
| SNAP47   | 0,724120765  | 5,741853583 | 6,91093E-13 | 5,1057E-12  |
| DPYD     | -1,553986507 | 5,853938144 | 7,12022E-13 | 5,25463E-12 |
| SNRPC    | 1,086057659  | 6,967793458 | 7,20942E-13 | 5,31471E-12 |
| NAE1     | 1,02225626   | 6,244493905 | 7,25329E-13 | 5,34127E-12 |
| KIAA1143 | -0,567668959 | 5,668800169 | 7,2795E-13  | 5,35479E-12 |
| TARBP1   | 1,352442377  | 5,975648097 | 7,76168E-13 | 5,70333E-12 |
| BDP1     | -0,851442935 | 4,983178048 | 7,88982E-13 | 5,79124E-12 |
| PTPRJ    | -1,15196536  | 5,663051287 | 8,01426E-13 | 5,87626E-12 |
| PSMG1    | 1,202365769  | 5,405342263 | 8,19442E-13 | 6,0019E-12  |
| RHBDD3   | 1,216733004  | 4,863988538 | 8,27153E-13 | 6,05188E-12 |
| ZNF131   | 1,059465326  | 5,887306817 | 8,38935E-13 | 6,13151E-12 |
| ACOT2    | -1,141189017 | 4,62252542  | 8,7285E-13  | 6,37255E-12 |
| ZNF25    | -0,959813032 | 3,875948415 | 8,7781E-13  | 6,40191E-12 |
| DHX34    | 1,196440835  | 5,243247845 | 8,82914E-13 | 6,43226E-12 |
| SNRPG    | 1,650519425  | 7,122325338 | 8,93207E-13 | 6,5003E-12  |
| PSMD7    | 0,857278441  | 7,431776579 | 9,09794E-13 | 6,61395E-12 |
| PAWR     | 1,071339734  | 5,103397894 | 9,19521E-13 | 6,67754E-12 |
| ROCK1    | -0,781044119 | 6,529005121 | 9,4693E-13  | 6,86927E-12 |
| RAPH1    | -1,146788283 | 6,120464256 | 9,52136E-13 | 6,8997E-12  |
| UBA7     | -1,33841783  | 5,508068444 | 9,7511E-13  | 7,05868E-12 |
| UQCRHL   | 1,412851951  | 3,994477254 | 9,77309E-13 | 7,0671E-12  |
| KLF11    | -0,91175779  | 5,422794838 | 9,79747E-13 | 7,07236E-12 |
| TADA2B   | -0,711967238 | 5,227372111 | 9,80111E-13 | 7,07236E-12 |

|          |              |             |             |             |
|----------|--------------|-------------|-------------|-------------|
| RNASEH1  | 0,941472759  | 4,884120865 | 9,88172E-13 | 7,12299E-12 |
| DVL3     | 1,75780366   | 8,377422274 | 9,95588E-13 | 7,16886E-12 |
| EXOC6    | -0,920413005 | 4,815515405 | 1,0386E-12  | 7,47071E-12 |
| SLC25A13 | 1,018413597  | 5,67933699  | 1,07026E-12 | 7,69028E-12 |
| CRABP2   | 4,348578278  | 7,145978763 | 1,08868E-12 | 7,81445E-12 |
| MDK      | 2,681571224  | 8,317814707 | 1,10569E-12 | 7,9282E-12  |
| CSTF2    | 1,325360719  | 5,231237173 | 1,12303E-12 | 8,04405E-12 |
| TRIM22   | -1,337305697 | 6,527165118 | 1,15338E-12 | 8,25275E-12 |
| PDCD10   | 1,562293424  | 6,999332635 | 1,17216E-12 | 8,37836E-12 |
| LMNA     | -1,004697971 | 9,132366682 | 1,20392E-12 | 8,59635E-12 |
| UBASH3B  | -1,54848946  | 4,733410797 | 1,21024E-12 | 8,63246E-12 |
| MPP6     | 1,821349455  | 3,480015877 | 1,26285E-12 | 8,99827E-12 |
| DOLPP1   | 1,039007365  | 5,105110792 | 1,27571E-12 | 9,08047E-12 |
| ITPK1    | -0,883905951 | 6,313561516 | 1,28466E-12 | 9,1346E-12  |
| RBL2     | -0,724075772 | 6,885964273 | 1,28783E-12 | 9,14761E-12 |
| PPP2CB   | -0,880952788 | 6,943364833 | 1,29034E-12 | 9,15592E-12 |
| PIGX     | 1,571218673  | 6,462496054 | 1,29779E-12 | 9,19919E-12 |
| RNF123   | -0,716419732 | 5,219182897 | 1,30442E-12 | 9,23662E-12 |
| USP5     | 0,945489951  | 7,602552705 | 1,36742E-12 | 9,67267E-12 |
| OPA1     | 1,146921818  | 7,406779032 | 1,38832E-12 | 9,81035E-12 |
| UCHL5    | 0,918698942  | 5,531945134 | 1,39986E-12 | 9,88164E-12 |
| CELSR2   | 2,26580907   | 6,662895861 | 1,42199E-12 | 1,00274E-11 |
| MED10    | 1,293759204  | 5,866114348 | 1,42713E-12 | 1,00533E-11 |
| NUP107   | 1,092363246  | 6,223344325 | 1,46725E-12 | 1,03252E-11 |
| EIF5A    | 0,997372178  | 9,477607539 | 1,47243E-12 | 1,03511E-11 |
| DPH2     | 1,105893025  | 5,527764306 | 1,51589E-12 | 1,06456E-11 |
| FNBP1    | -1,062696049 | 6,116577523 | 1,54934E-12 | 1,08693E-11 |
| CSTF3    | 0,78020469   | 5,511040371 | 1,60226E-12 | 1,12278E-11 |
| KIAA0907 | 1,379112863  | 6,005763099 | 1,60373E-12 | 1,12278E-11 |
| DRG1     | 1,161438664  | 6,932087182 | 1,62008E-12 | 1,13306E-11 |
| NLN      | 1,263333747  | 5,072120254 | 1,62658E-12 | 1,13644E-11 |
| TBL1XR1  | 1,633458824  | 8,720076465 | 1,63295E-12 | 1,13972E-11 |
| IK       | -0,638947552 | 6,892820851 | 1,6744E-12  | 1,16745E-11 |
| FNDC3A   | -0,865216714 | 6,325696112 | 1,68771E-12 | 1,17554E-11 |
| VAMP3    | -0,724045484 | 7,281521679 | 1,71841E-12 | 1,1957E-11  |
| AFF4     | -0,825898469 | 6,851647625 | 1,74189E-12 | 1,2108E-11  |
| EGLN3    | 3,538050809  | 7,386484898 | 1,74787E-12 | 1,21372E-11 |
| NEK7     | -0,999172342 | 6,646530437 | 1,7698E-12  | 1,2277E-11  |
| ARNT     | -0,651964992 | 6,447134186 | 1,81336E-12 | 1,25664E-11 |
| SPAG9    | -0,702154315 | 7,101188079 | 1,86136E-12 | 1,28859E-11 |
| CKAP4    | 1,286979453  | 8,260770953 | 1,884E-12   | 1,30294E-11 |
| UBTD1    | -1,096477186 | 4,762162522 | 1,92388E-12 | 1,32917E-11 |
| CAPN2    | -1,030259682 | 8,628306837 | 1,98175E-12 | 1,36777E-11 |
| FBXW4    | -0,865225663 | 6,036105624 | 2,08653E-12 | 1,43863E-11 |
| KCMF1    | 0,866791256  | 7,1855473   | 2,10408E-12 | 1,44927E-11 |
| TBCCD1   | 1,283125162  | 5,584985913 | 2,12438E-12 | 1,46177E-11 |
| MKL2     | -0,960033224 | 6,055053057 | 2,15231E-12 | 1,4795E-11  |
| STX7     | -0,857683058 | 6,082830037 | 2,1638E-12  | 1,4859E-11  |
| HIPK3    | -1,0377211   | 6,156601627 | 2,1671E-12  | 1,48666E-11 |
| MRPS24   | 1,199558386  | 6,550772734 | 2,18108E-12 | 1,49475E-11 |

|          |              |             |             |             |
|----------|--------------|-------------|-------------|-------------|
| SLC19A2  | -1,141003304 | 5,048566612 | 2,19463E-12 | 1,50253E-11 |
| MLLT6    | -0,94308543  | 7,267018436 | 2,42052E-12 | 1,65552E-11 |
| FCHSD2   | -0,822549724 | 5,847631258 | 2,48492E-12 | 1,69786E-11 |
| DDX5     | -0,615605267 | 9,414017539 | 2,48931E-12 | 1,69916E-11 |
| POLE3    | 1,170612103  | 7,350664438 | 2,50349E-12 | 1,70713E-11 |
| DYNC1LI2 | -0,751542288 | 7,140856692 | 2,63092E-12 | 1,79089E-11 |
| MRPS26   | 1,300361978  | 6,13164994  | 2,63157E-12 | 1,79089E-11 |
| GAB1     | -1,235013373 | 5,223807438 | 2,65973E-12 | 1,80825E-11 |
| XPNPEP3  | 1,043661817  | 4,634156652 | 2,67739E-12 | 1,81844E-11 |
| ACAT1    | -0,922426001 | 5,828371741 | 2,69971E-12 | 1,83177E-11 |
| SPAST    | 1,200574901  | 6,320321835 | 2,70437E-12 | 1,83311E-11 |
| SNRPF    | 1,109379689  | 6,168645222 | 2,73663E-12 | 1,85314E-11 |
| SEC61A2  | 1,37731325   | 3,29532556  | 2,76182E-12 | 1,86834E-11 |
| CDH24    | 1,75046951   | 4,395955093 | 2,80991E-12 | 1,89899E-11 |
| NFAT5    | -0,959142383 | 6,087843393 | 2,84153E-12 | 1,91846E-11 |
| SUPV3L1  | 0,800663233  | 5,357031676 | 2,88481E-12 | 1,94575E-11 |
| PA2G4    | 0,806228302  | 8,104851844 | 2,92401E-12 | 1,97024E-11 |
| PCF11    | -0,784188109 | 5,654961164 | 2,94192E-12 | 1,98035E-11 |
| ETS2     | -1,196775709 | 8,076933256 | 3,03689E-12 | 2,04227E-11 |
| HSPB1    | 2,05888313   | 10,10678154 | 3,04389E-12 | 2,04495E-11 |
| KIAA1377 | -1,3172298   | 2,992155449 | 3,11131E-12 | 2,08819E-11 |
| SERPINB6 | -1,09492554  | 6,809035465 | 3,31194E-12 | 2,22066E-11 |
| PARP4    | -0,900803227 | 6,764747459 | 3,496E-12   | 2,34177E-11 |
| WDR74    | 1,01862905   | 5,754944015 | 3,56123E-12 | 2,38312E-11 |
| TCF7L2   | -0,896971484 | 5,126033039 | 3,63244E-12 | 2,4277E-11  |
| ATAD3A   | 1,217734125  | 5,661986763 | 3,63496E-12 | 2,4277E-11  |
| SOX12    | 1,708478317  | 5,737418735 | 3,68069E-12 | 2,45583E-11 |
| UBA2     | 1,155437654  | 8,125700553 | 3,70102E-12 | 2,46699E-11 |
| UFD1L    | 1,151648901  | 7,005697562 | 3,7145E-12  | 2,47356E-11 |
| UQCRH    | 1,302786699  | 7,587629093 | 3,7516E-12  | 2,49582E-11 |
| NARF     | 1,212803318  | 6,445982438 | 3,90265E-12 | 2,59378E-11 |
| DAP3     | 0,932310267  | 7,419239078 | 3,91772E-12 | 2,60126E-11 |
| ZFYVE16  | -0,706703709 | 5,548302072 | 4,06163E-12 | 2,69419E-11 |
| NFIA     | -1,142700697 | 5,448484771 | 4,28371E-12 | 2,83874E-11 |
| PDE4DIP  | -0,996986355 | 6,660366217 | 4,40796E-12 | 2,91824E-11 |
| HLA-DRA  | -1,698176575 | 10,65978383 | 4,62729E-12 | 3,06047E-11 |
| ANTXR2   | -1,325783473 | 5,714827919 | 4,69188E-12 | 3,10018E-11 |
| ZFAND5   | -0,821658163 | 8,156580251 | 4,87838E-12 | 3,2203E-11  |
| TOB2     | -0,749799587 | 6,634971084 | 5,0373E-12  | 3,32199E-11 |
| MSTO1    | 1,00728517   | 5,657641616 | 5,19982E-12 | 3,42585E-11 |
| AIF1     | -1,45108482  | 5,239389799 | 5,29294E-12 | 3,48384E-11 |
| SNHG4    | 1,755563379  | 1,349965951 | 5,32002E-12 | 3,49829E-11 |
| PDZD11   | 1,044439457  | 5,987706309 | 5,35928E-12 | 3,52071E-11 |
| INO80    | -0,758667281 | 5,580452917 | 5,42546E-12 | 3,56075E-11 |
| PHGDH    | 2,357677547  | 7,223492479 | 5,43727E-12 | 3,56507E-11 |
| CEP76    | 1,25987588   | 3,970819177 | 5,65595E-12 | 3,70489E-11 |
| GPR89A   | 0,775183811  | 4,844260296 | 5,68425E-12 | 3,71986E-11 |
| HEATR1   | 0,93384892   | 6,542865166 | 5,76139E-12 | 3,76672E-11 |
| EVL      | -0,913866363 | 6,330299876 | 5,83235E-12 | 3,80946E-11 |
| TOMM22   | 1,295977044  | 7,451849521 | 6,23578E-12 | 4,06907E-11 |



|           |              |             |             |             |
|-----------|--------------|-------------|-------------|-------------|
| KIAA0319L | -0,891148579 | 6,69968101  | 6,33232E-12 | 4,12811E-11 |
| TDRD3     | -0,868689436 | 4,248183246 | 6,56515E-12 | 4,2735E-11  |
| C8orf4    | -1,950234705 | 7,170413773 | 6,56787E-12 | 4,2735E-11  |
| FAM8A1    | -0,862748782 | 5,833068322 | 6,61517E-12 | 4,30017E-11 |
| FBL       | 1,584812225  | 8,223946922 | 6,67331E-12 | 4,33384E-11 |
| TSPAN13   | -1,321786936 | 7,567169713 | 6,70668E-12 | 4,35136E-11 |
| B4GALT4   | 1,966783276  | 6,690098529 | 6,75834E-12 | 4,38071E-11 |
| FYN       | -1,214789061 | 5,703988647 | 6,79447E-12 | 4,39995E-11 |
| ABHD5     | -0,837837941 | 5,494646827 | 6,92462E-12 | 4,47998E-11 |
| WBP2      | -0,701772238 | 7,335164931 | 6,94192E-12 | 4,48691E-11 |
| DARS      | 0,978672359  | 7,382120269 | 7,12258E-12 | 4,59933E-11 |
| ZC3HAV1L  | 1,649156793  | 3,135157028 | 7,55851E-12 | 4,8762E-11  |
| MLF2      | 0,99029622   | 8,44892123  | 7,60814E-12 | 4,90359E-11 |
| SNRNP25   | 1,357349534  | 5,682499857 | 7,84642E-12 | 5,05238E-11 |
| ARL6IP6   | 1,036958437  | 5,489398728 | 7,88047E-12 | 5,06952E-11 |
| LYZ       | -1,805993443 | 9,517763173 | 8,50473E-12 | 5,46595E-11 |
| DCUN1D1   | 1,892469951  | 6,967260503 | 8,57788E-12 | 5,50778E-11 |
| PAFAH1B1  | -0,652983427 | 7,547061082 | 8,62167E-12 | 5,53068E-11 |
| DNAJA3    | 1,048636501  | 6,548785926 | 8,90783E-12 | 5,70888E-11 |
| TMEM66    | -0,871999474 | 8,247063214 | 9,11754E-12 | 5,83779E-11 |
| SENP5     | 1,096408755  | 6,686155842 | 9,20227E-12 | 5,88652E-11 |
| MRPL15    | 1,259998257  | 6,338906338 | 9,26053E-12 | 5,91823E-11 |
| HSPA4L    | 2,097544083  | 4,766502506 | 9,2945E-12  | 5,93438E-11 |
| PFKP      | 1,569506127  | 7,60765116  | 9,38345E-12 | 5,98557E-11 |
| NDUFB5    | 1,676857136  | 7,629781818 | 9,48073E-12 | 6,04197E-11 |
| CMAS      | 1,139535497  | 6,17547254  | 9,84851E-12 | 6,2705E-11  |
| TAF2      | 0,792553055  | 5,944620708 | 9,94682E-12 | 6,32718E-11 |
| NUCB1     | -0,806076238 | 8,744695946 | 9,96534E-12 | 6,33305E-11 |
| IDS       | -0,832333941 | 7,843544281 | 1,00849E-11 | 6,40304E-11 |
| PPM1G     | 0,815827956  | 7,875653362 | 1,01023E-11 | 6,40815E-11 |
| TOMM70A   | 0,910448787  | 7,241580076 | 1,03962E-11 | 6,58843E-11 |
| CDKN1A    | -1,23691192  | 7,913372614 | 1,05866E-11 | 6,70291E-11 |
| CTHRC1    | 2,509259878  | 6,674919507 | 1,09178E-11 | 6,90616E-11 |
| NEDD4L    | -1,12622781  | 7,008060581 | 1,10539E-11 | 6,9858E-11  |
| L2HGDH    | 1,000502775  | 5,200036366 | 1,11625E-11 | 7,04787E-11 |
| DPY30     | 1,170583849  | 5,809262884 | 1,1241E-11  | 7,09086E-11 |
| FAM91A1   | 0,770929581  | 6,937052568 | 1,13834E-11 | 7,17406E-11 |
| DLG5      | 1,471036308  | 7,050604342 | 1,14529E-11 | 7,21118E-11 |
| EIF6      | 1,063122664  | 7,884695883 | 1,17876E-11 | 7,41512E-11 |
| OCIAD2    | 1,614091525  | 6,501273493 | 1,1902E-11  | 7,48018E-11 |
| PTGES3    | 0,85913661   | 9,250576325 | 1,19695E-11 | 7,51563E-11 |
| YEATS4    | 1,548456442  | 5,379712966 | 1,2096E-11  | 7,58807E-11 |
| WASF1     | 2,504515076  | 5,251086859 | 1,21868E-11 | 7,63803E-11 |
| RCN2      | 1,374683938  | 7,416077228 | 1,23228E-11 | 7,7162E-11  |
| ADRM1     | 0,844692587  | 7,377909018 | 1,24679E-11 | 7,79989E-11 |
| CRIP1     | 1,398484965  | 5,425582495 | 1,25312E-11 | 7,83229E-11 |
| CHD1      | -0,788075252 | 5,38631823  | 1,29555E-11 | 8,09005E-11 |
| CTDSP1    | -0,712510671 | 7,180314722 | 1,29981E-11 | 8,10927E-11 |
| TSMF      | 0,971928727  | 5,546160734 | 1,30775E-11 | 8,15132E-11 |
| UBE2V2    | 0,963011766  | 6,15789055  | 1,41852E-11 | 8,8337E-11  |

|           |              |             |             |             |
|-----------|--------------|-------------|-------------|-------------|
| RUFY1     | -0,718519147 | 5,61197401  | 1,42203E-11 | 8,84747E-11 |
| RIPK1     | -0,661705787 | 5,806120397 | 1,44361E-11 | 8,97353E-11 |
| PDIA4     | 1,32670713   | 9,20964564  | 1,44612E-11 | 8,98094E-11 |
| GALNT10   | -1,219927369 | 5,991456955 | 1,46936E-11 | 9,117E-11   |
| CDK2AP1   | 0,91457422   | 7,749058912 | 1,47648E-11 | 9,15281E-11 |
| PLXDC2    | -1,239934411 | 5,446795708 | 1,47782E-11 | 9,15281E-11 |
| MTCH2     | 0,89564863   | 7,180459844 | 1,48426E-11 | 9,18435E-11 |
| TRMT2A    | 1,156213858  | 5,6516202   | 1,5357E-11  | 9,49033E-11 |
| TBC1D9    | -1,089852066 | 6,028244674 | 1,53649E-11 | 9,49033E-11 |
| SLC33A1   | 0,963509074  | 6,195440653 | 1,57033E-11 | 9,69057E-11 |
| GTF2H4    | 0,831633554  | 5,156122152 | 1,57432E-11 | 9,70638E-11 |
| RPAP3     | 0,768694459  | 5,526587636 | 1,60852E-11 | 9,90829E-11 |
| ZC3H13    | -0,868922377 | 6,165538262 | 1,63517E-11 | 1,00634E-10 |
| PDIA6     | 1,02218841   | 9,384794682 | 1,68838E-11 | 1,03815E-10 |
| LAGE3     | 1,380765994  | 4,983210471 | 1,71065E-11 | 1,05089E-10 |
| C1orf109  | 1,012490895  | 4,749093207 | 1,71443E-11 | 1,05227E-10 |
| PAR-SN    | -1,255830342 | 2,961446295 | 1,74781E-11 | 1,07179E-10 |
| LCLAT1    | 0,973655093  | 5,954064528 | 1,76047E-11 | 1,07858E-10 |
| SAAL1     | 1,055069581  | 4,120625779 | 1,76461E-11 | 1,08015E-10 |
| DUSP11    | 0,994307278  | 5,820217837 | 1,77719E-11 | 1,08688E-10 |
| HEATR2    | 0,950534176  | 5,919444764 | 1,80387E-11 | 1,1022E-10  |
| PXK       | -0,829710942 | 3,788794212 | 1,80779E-11 | 1,10361E-10 |
| BANF1     | 1,023537144  | 7,911835607 | 1,81274E-11 | 1,10478E-10 |
| TAF1A     | 0,949053102  | 3,520592326 | 1,81294E-11 | 1,10478E-10 |
| LRPAP1    | -0,793872553 | 7,251796268 | 1,85319E-11 | 1,1283E-10  |
| PGAM1     | 1,146033258  | 9,359038143 | 1,90127E-11 | 1,15653E-10 |
| N4BP2L1   | -1,327231003 | 3,861168663 | 1,93895E-11 | 1,17841E-10 |
| CIRH1A    | 0,904359078  | 6,460979274 | 2,00393E-11 | 1,21681E-10 |
| C4orf46   | 1,149190588  | 4,222208016 | 2,02127E-11 | 1,22625E-10 |
| BAIAP2L1  | 1,074271912  | 6,762031533 | 2,05276E-11 | 1,24425E-10 |
| C1QBP     | 1,211564656  | 7,260221528 | 2,07537E-11 | 1,25683E-10 |
| SETD2     | -0,714389807 | 6,249098593 | 2,09278E-11 | 1,26625E-10 |
| DGKA      | 1,70261343   | 6,433550251 | 2,1011E-11  | 1,27016E-10 |
| KLF4      | -1,563717282 | 6,625649211 | 2,11166E-11 | 1,27541E-10 |
| WDFY3     | -0,890835799 | 5,900933271 | 2,1294E-11  | 1,28499E-10 |
| PES1      | 1,049964403  | 7,332457299 | 2,1768E-11  | 1,31243E-10 |
| VPS72     | 1,080909339  | 6,260485321 | 2,18709E-11 | 1,31747E-10 |
| FRMD6     | 1,942972565  | 7,113340717 | 2,19085E-11 | 1,31857E-10 |
| NAA25     | 0,840701205  | 5,479161829 | 2,20009E-11 | 1,32296E-10 |
| CLNS1A    | 1,260649361  | 7,150831033 | 2,25426E-11 | 1,35434E-10 |
| RINT1     | 0,883567032  | 5,345318861 | 2,25919E-11 | 1,35611E-10 |
| SSBP1     | 0,971107468  | 6,683045117 | 2,26312E-11 | 1,35728E-10 |
| SRRT      | 0,730560778  | 6,971008333 | 2,29569E-11 | 1,3756E-10  |
| HIST1H2BD | 2,211386084  | 4,343569518 | 2,35393E-11 | 1,40926E-10 |
| IFIT5     | -1,012699174 | 5,239177791 | 2,36206E-11 | 1,41288E-10 |
| PTGES2    | 0,968903891  | 5,926798857 | 2,37884E-11 | 1,42168E-10 |
| POLR2J    | 1,118639658  | 6,066557326 | 2,40143E-11 | 1,43392E-10 |
| NUPL2     | 1,00729511   | 5,218528522 | 2,46698E-11 | 1,47177E-10 |
| RPF2      | 0,944485407  | 5,044943442 | 2,55532E-11 | 1,52314E-10 |
| MAML2     | -1,251493327 | 4,555767281 | 2,60877E-11 | 1,55364E-10 |

|           |              |             |             |             |
|-----------|--------------|-------------|-------------|-------------|
| PITPNA    | -0,650593806 | 6,982761745 | 2,62928E-11 | 1,56449E-10 |
| ATP2B4    | -1,109500471 | 7,964558467 | 2,68563E-11 | 1,59597E-10 |
| FAM63B    | -0,868864136 | 3,969580509 | 2,68686E-11 | 1,59597E-10 |
| FXR1      | 1,467556358  | 8,162764115 | 2,69143E-11 | 1,59603E-10 |
| ABTB1     | -1,002140014 | 4,854231251 | 2,69165E-11 | 1,59603E-10 |
| CENPQ     | 1,466341303  | 4,125022903 | 2,71293E-11 | 1,60725E-10 |
| RPAP2     | 0,982443574  | 4,413587718 | 2,73507E-11 | 1,61896E-10 |
| FASTKD3   | 1,248385977  | 4,1553995   | 2,80354E-11 | 1,65805E-10 |
| TCP1      | 1,001414033  | 8,413561168 | 2,8264E-11  | 1,67012E-10 |
| PARP1     | 0,933136882  | 8,319742528 | 2,98106E-11 | 1,75999E-10 |
| MSH2      | 1,188179865  | 6,17673538  | 3,08146E-11 | 1,81769E-10 |
| FBXL19    | 1,292891543  | 4,969238465 | 3,24923E-11 | 1,915E-10   |
| ATP6V1B2  | -0,827056113 | 7,371231361 | 3,25268E-11 | 1,91537E-10 |
| LOC220729 | 1,406211292  | 4,332084669 | 3,27081E-11 | 1,92439E-10 |
| EPC1      | -0,692408271 | 4,533494251 | 3,34699E-11 | 1,96751E-10 |
| RNF187    | 0,847553605  | 7,880556336 | 3,36651E-11 | 1,97728E-10 |
| FBXL3     | -0,727146964 | 6,094241654 | 3,38772E-11 | 1,98803E-10 |
| PAIP1     | 1,068137368  | 7,72854915  | 3,40715E-11 | 1,99771E-10 |
| IGFBP2    | 3,342391451  | 9,653774326 | 3,41165E-11 | 1,99863E-10 |
| SDC4      | -1,410018213 | 8,849751854 | 3,44086E-11 | 2,01401E-10 |
| NSUN2     | 1,077989252  | 7,202064686 | 3,46681E-11 | 2,02698E-10 |
| CRIP1     | -1,883489866 | 6,379768537 | 3,46897E-11 | 2,02698E-10 |
| PARP2     | 0,962929342  | 5,02801012  | 3,53656E-11 | 2,06471E-10 |
| IRAK1     | 0,980236304  | 7,865747964 | 3,60067E-11 | 2,10034E-10 |
| TIMM10    | 1,108099413  | 5,27785352  | 3,79036E-11 | 2,2091E-10  |
| RBM34     | 0,793061907  | 5,397631282 | 3,84379E-11 | 2,23833E-10 |
| LILRB2    | -1,415206152 | 4,14833051  | 3,9349E-11  | 2,28943E-10 |
| HAUS5     | 1,153284681  | 5,169301373 | 3,96717E-11 | 2,30624E-10 |
| HNMT      | -1,333153506 | 5,286084259 | 4,04537E-11 | 2,34969E-10 |
| DDX55     | 0,840147861  | 5,106586732 | 4,1715E-11  | 2,42089E-10 |
| ZNF330    | -0,661825048 | 5,053005301 | 4,2128E-11  | 2,44278E-10 |
| KIAA0240  | -0,819175542 | 4,999830513 | 4,2952E-11  | 2,48844E-10 |
| PLEKHB2   | -0,614742362 | 7,697545473 | 4,35794E-11 | 2,52265E-10 |
| NCAPD3    | 1,159006674  | 5,916518503 | 4,48263E-11 | 2,59263E-10 |
| METTL5    | 0,992771303  | 5,476732363 | 4,48854E-11 | 2,59384E-10 |
| PSMC2     | 0,859902891  | 7,473100951 | 4,53245E-11 | 2,617E-10   |
| MBNL1     | -0,685218311 | 7,97068392  | 4,5842E-11  | 2,64351E-10 |
| STEAP1    | 2,170850623  | 5,283941531 | 4,58611E-11 | 2,64351E-10 |
| NIF3L1    | 1,054284551  | 5,488821217 | 4,65631E-11 | 2,6817E-10  |
| GPR89C    | 0,799930674  | 3,158318219 | 4,87734E-11 | 2,80663E-10 |
| EXOSC3    | 1,180625476  | 4,879021908 | 5,09824E-11 | 2,93127E-10 |
| MAPK3     | -0,801815325 | 6,308615245 | 5,14058E-11 | 2,95313E-10 |
| MRPL4     | 1,223590569  | 6,425655442 | 5,14826E-11 | 2,95505E-10 |
| EIF4A3    | 0,927367632  | 7,519091223 | 5,17015E-11 | 2,96512E-10 |
| GTF3C3    | 0,843979017  | 5,997845064 | 5,2393E-11  | 3,00225E-10 |
| SIRPA     | -1,196771345 | 6,803053724 | 5,39887E-11 | 3,09109E-10 |
| PION      | -1,214369903 | 4,92787807  | 5,44401E-11 | 3,11432E-10 |
| CRY1      | -0,818660687 | 5,077613542 | 5,53373E-11 | 3,16299E-10 |
| VTA1      | 0,82277677   | 6,464852239 | 5,58372E-11 | 3,18889E-10 |
| EAF1      | -0,582523907 | 5,700426099 | 5,70234E-11 | 3,25391E-10 |

|           |              |             |             |             |
|-----------|--------------|-------------|-------------|-------------|
| AMZ2      | 1,085513865  | 6,925228071 | 5,74762E-11 | 3,27701E-10 |
| PABPC3    | 1,218656236  | 2,492911737 | 5,89209E-11 | 3,35657E-10 |
| METTL2A   | 0,865816093  | 5,404144415 | 5,90271E-11 | 3,35981E-10 |
| GARS      | 1,052919856  | 7,780527017 | 5,91426E-11 | 3,36358E-10 |
| HEXB      | -0,79162508  | 7,384101518 | 5,98909E-11 | 3,4033E-10  |
| RNPS1     | 0,744530721  | 7,812109494 | 6,0044E-11  | 3,40916E-10 |
| LOC388796 | 1,451279565  | 5,306970647 | 6,12245E-11 | 3,47329E-10 |
| HCST      | -1,460125593 | 3,563872466 | 6,13226E-11 | 3,47597E-10 |
| PNPT1     | 0,996756078  | 6,400700953 | 6,20673E-11 | 3,51518E-10 |
| C5orf28   | 1,264155728  | 5,005384369 | 6,21175E-11 | 3,51518E-10 |
| MGC72080  | 1,530762031  | 4,034829563 | 6,28873E-11 | 3,55579E-10 |
| LITAF     | -0,89426035  | 8,271955299 | 6,31529E-11 | 3,56785E-10 |
| ANKRD40   | -0,610448211 | 6,578282483 | 6,51709E-11 | 3,67881E-10 |
| RUVBL2    | 0,958660156  | 7,20676614  | 6,59585E-11 | 3,72019E-10 |
| PPP1CC    | 0,717273349  | 7,995978516 | 6,60713E-11 | 3,72347E-10 |
| PUF60     | 0,89091249   | 7,985828016 | 6,71832E-11 | 3,78301E-10 |
| ATF3      | -1,620146205 | 6,814264768 | 6,75289E-11 | 3,79933E-10 |
| ITGB2     | -1,474232314 | 7,458973833 | 6,98847E-11 | 3,92864E-10 |
| PARVA     | -0,882183583 | 6,549452497 | 7,28276E-11 | 4,0907E-10  |
| FBXO22    | 0,893430583  | 5,307343932 | 7,31494E-11 | 4,1054E-10  |
| PYGO2     | 0,807280486  | 6,597346725 | 7,36758E-11 | 4,13154E-10 |
| SKAP2     | -0,834363654 | 6,228194665 | 7,41461E-11 | 4,15449E-10 |
| MRPS10    | 0,924594056  | 6,469562395 | 7,47111E-11 | 4,18272E-10 |
| MLL5      | -0,761408661 | 6,615476511 | 7,50846E-11 | 4,20018E-10 |
| DSC2      | 2,310070412  | 7,729810581 | 7,61108E-11 | 4,2541E-10  |
| SLC1A4    | 1,996302369  | 7,290752688 | 7,84112E-11 | 4,37908E-10 |
| TIPIN     | 1,138861121  | 3,414780069 | 7,86723E-11 | 4,38912E-10 |
| MOCS3     | 0,835312844  | 4,433096756 | 7,87196E-11 | 4,38912E-10 |
| SRPX      | -1,849801579 | 4,332204556 | 7,9331E-11  | 4,41959E-10 |
| SNRNP40   | 0,833228336  | 6,235666478 | 8,20446E-11 | 4,56704E-10 |
| MRPS33    | 1,250670211  | 5,772908389 | 8,24457E-11 | 4,58562E-10 |
| ATP6V0D1  | -0,805735902 | 7,214718394 | 8,31389E-11 | 4,61831E-10 |
| N4BP1     | -0,770574979 | 6,654254596 | 8,31866E-11 | 4,61831E-10 |
| LRPPRC    | 0,922957646  | 8,125405527 | 8,32366E-11 | 4,61831E-10 |
| RABEP1    | -0,691301332 | 6,041391754 | 8,33285E-11 | 4,61965E-10 |
| KCTD2     | -0,662347898 | 5,614278889 | 8,40374E-11 | 4,65517E-10 |
| RAB5B     | -0,572946627 | 7,930537044 | 8,57945E-11 | 4,74864E-10 |
| TJP2      | -0,9856212   | 6,714965381 | 8,95837E-11 | 4,95435E-10 |
| FBXL5     | -0,827019529 | 7,10590367  | 8,98246E-11 | 4,96365E-10 |
| COASY     | 0,787089101  | 6,755448174 | 9,10327E-11 | 5,02633E-10 |
| KATNAL1   | -0,836104457 | 4,128952671 | 9,275E-11   | 5,11701E-10 |
| PGK1      | 1,372323202  | 10,54415871 | 9,77975E-11 | 5,39112E-10 |
| HTT       | -1,00255931  | 6,76561037  | 9,83281E-11 | 5,41599E-10 |
| PSMC4     | 1,216752964  | 7,488315786 | 1,00161E-10 | 5,5125E-10  |
| ALG6      | 0,809160256  | 4,501796779 | 1,01964E-10 | 5,60722E-10 |
| PABPC1    | 1,100367037  | 11,27158642 | 1,03248E-10 | 5,67324E-10 |
| EIF2AK1   | 0,713091747  | 8,237231484 | 1,04797E-10 | 5,7537E-10  |
| ADSL      | 1,148899191  | 6,904885794 | 1,05798E-10 | 5,80399E-10 |
| ROCK2     | -0,92279234  | 5,820255496 | 1,05913E-10 | 5,80562E-10 |
| RAP1A     | -0,759116213 | 6,472403215 | 1,06541E-10 | 5,83537E-10 |

|           |              |             |             |             |
|-----------|--------------|-------------|-------------|-------------|
| TIMM44    | 1,096390544  | 5,637850792 | 1,07211E-10 | 5,86737E-10 |
| HNRNPC    | 0,693016761  | 9,674806541 | 1,07894E-10 | 5,90001E-10 |
| PLAU      | 2,557613847  | 8,267997235 | 1,08694E-10 | 5,93896E-10 |
| VPS11     | -0,656742394 | 5,901512953 | 1,10301E-10 | 6,02198E-10 |
| EMP1      | -1,447442705 | 8,53741523  | 1,12433E-10 | 6,13344E-10 |
| VWA5A     | -1,246136589 | 5,452354666 | 1,13256E-10 | 6,17338E-10 |
| KIAA0513  | -1,225325477 | 4,795276425 | 1,13415E-10 | 6,17714E-10 |
| NPDC1     | -1,273466111 | 4,992989664 | 1,13944E-10 | 6,20098E-10 |
| RPLP0     | 1,166544171  | 11,86542381 | 1,14232E-10 | 6,21168E-10 |
| CHORDC1   | 1,250909385  | 5,55750653  | 1,15157E-10 | 6,25701E-10 |
| LZTFL1    | -0,77758569  | 4,785943196 | 1,16508E-10 | 6,32539E-10 |
| HMHA1     | -1,10192839  | 5,503139109 | 1,16909E-10 | 6,34006E-10 |
| ATP5G1    | 1,372480947  | 6,676575371 | 1,16964E-10 | 6,34006E-10 |
| ERO1L     | 2,093854109  | 7,869995082 | 1,18176E-10 | 6,40066E-10 |
| POLR1C    | 1,026714168  | 5,481565094 | 1,19292E-10 | 6,45599E-10 |
| IDH2      | 1,319430002  | 7,779180318 | 1,20533E-10 | 6,51797E-10 |
| TMEM183A  | 1,292699809  | 7,689841316 | 1,23678E-10 | 6,68273E-10 |
| LDHA      | 1,278633512  | 10,56731631 | 1,26178E-10 | 6,8124E-10  |
| TMED3     | 1,098984328  | 7,465928369 | 1,26588E-10 | 6,82912E-10 |
| TRMT6     | 1,030137153  | 5,639351475 | 1,27535E-10 | 6,87481E-10 |
| C4A       | -1,80453539  | 7,921804241 | 1,27672E-10 | 6,87673E-10 |
| APOA1BP   | 1,438352634  | 7,655008953 | 1,27933E-10 | 6,88536E-10 |
| STRAP     | 0,953821114  | 8,023946898 | 1,29386E-10 | 6,95807E-10 |
| C20orf194 | -1,099706899 | 5,269204717 | 1,30802E-10 | 7,02868E-10 |
| AAAS      | 0,653162541  | 5,709780763 | 1,31153E-10 | 7,04197E-10 |
| PLVAP     | -1,130238146 | 6,433382248 | 1,32069E-10 | 7,08561E-10 |
| CLEC16A   | -0,854159691 | 5,370982249 | 1,35626E-10 | 7,27072E-10 |
| NMD3      | 1,090709794  | 7,089431049 | 1,36687E-10 | 7,32184E-10 |
| PWP1      | 0,610550332  | 6,323767497 | 1,38893E-10 | 7,43415E-10 |
| RALGPS2   | 1,279241905  | 5,120513752 | 1,4028E-10  | 7,5025E-10  |
| NSUN5     | 1,045064881  | 5,326159933 | 1,41345E-10 | 7,55355E-10 |
| CCDC142   | 0,700424733  | 5,418728493 | 1,42424E-10 | 7,60524E-10 |
| GCSH      | 1,445002509  | 5,509255743 | 1,46825E-10 | 7,83409E-10 |
| H2AFY2    | 1,732811564  | 5,578027763 | 1,48027E-10 | 7,89207E-10 |
| GTF3C2    | 0,636546764  | 6,886999962 | 1,48275E-10 | 7,89912E-10 |
| APEX1     | 0,907718171  | 7,799240782 | 1,48517E-10 | 7,90585E-10 |
| OTUD4     | -0,726665378 | 6,187528197 | 1,53059E-10 | 8,14126E-10 |
| SH3GL1    | 0,875235153  | 7,196703995 | 1,63132E-10 | 8,66827E-10 |
| MRPS35    | 1,078850679  | 6,804489676 | 1,63221E-10 | 8,66827E-10 |
| TSC22D1   | -1,100128663 | 8,198129503 | 1,68831E-10 | 8,95921E-10 |
| NCOA7     | -1,384338073 | 7,238127121 | 1,69219E-10 | 8,97282E-10 |
| POLR2G    | 0,960359878  | 6,618774839 | 1,71465E-10 | 9,08486E-10 |
| RAP2B     | 1,360271691  | 7,273174693 | 1,72258E-10 | 9,1198E-10  |
| CD47      | -1,07722945  | 7,793292014 | 1,72516E-10 | 9,12635E-10 |
| PHF5A     | 1,296847444  | 6,186912635 | 1,87086E-10 | 9,88948E-10 |
| TARS2     | 0,767092004  | 5,403752591 | 1,87264E-10 | 9,89117E-10 |
| SUMO2     | 0,870409482  | 8,649822336 | 1,88092E-10 | 9,92521E-10 |
| WDR77     | 0,983479639  | 6,163716926 | 1,88199E-10 | 9,92521E-10 |
| ZNF7      | 0,76567059   | 5,179129667 | 1,88979E-10 | 9,95866E-10 |
| CDYL      | 0,868767921  | 5,908110996 | 1,91015E-10 | 1,00582E-09 |

|           |              |             |             |             |
|-----------|--------------|-------------|-------------|-------------|
| GNL3      | 0,767275264  | 6,791567582 | 1,91676E-10 | 1,00852E-09 |
| SFN       | 2,496841874  | 9,539126931 | 1,93001E-10 | 1,01471E-09 |
| LYST      | -1,055174043 | 5,147798794 | 1,93178E-10 | 1,01485E-09 |
| SLC27A1   | -0,787763185 | 4,994424859 | 1,93655E-10 | 1,01658E-09 |
| DPP3      | 0,852790952  | 6,670016043 | 1,95082E-10 | 1,02328E-09 |
| GOT2      | 0,992327316  | 7,60088042  | 2,01697E-10 | 1,05717E-09 |
| RBL1      | 1,020776036  | 4,312134808 | 2,02841E-10 | 1,06234E-09 |
| FBXW2     | -0,657744419 | 6,621174966 | 2,04969E-10 | 1,07266E-09 |
| MRPS22    | 1,027977357  | 5,879947483 | 2,0619E-10  | 1,07823E-09 |
| DNAJC2    | 0,936620314  | 5,771093461 | 2,06507E-10 | 1,07906E-09 |
| OTUB1     | 0,703067435  | 7,340460296 | 2,07857E-10 | 1,08528E-09 |
| SLU7      | -0,560151781 | 5,897540303 | 2,12976E-10 | 1,11116E-09 |
| VDAC2     | 1,01539285   | 8,418056218 | 2,22849E-10 | 1,16178E-09 |
| TNFRSF10D | -1,642226111 | 3,808541555 | 2,25193E-10 | 1,1731E-09  |
| DSCR3     | -0,621912366 | 5,918224392 | 2,38729E-10 | 1,24267E-09 |
| SAMD1     | 0,994933381  | 4,881897089 | 2,38936E-10 | 1,24279E-09 |
| PPM1K     | -1,156666078 | 3,919153952 | 2,45803E-10 | 1,27754E-09 |
| PARL      | 1,548200107  | 7,270325691 | 2,50492E-10 | 1,30092E-09 |
| NR2F2     | -1,050327021 | 5,799367899 | 2,55456E-10 | 1,32569E-09 |
| PREB      | 0,958267915  | 6,940353644 | 2,64111E-10 | 1,36956E-09 |
| CAD       | 1,224050963  | 6,864700592 | 2,64349E-10 | 1,36976E-09 |
| PDCD6     | 1,385839952  | 7,725772257 | 2,72423E-10 | 1,41052E-09 |
| DNMT3A    | 1,1065068    | 5,594837984 | 2,75392E-10 | 1,42481E-09 |
| MPHOSPH10 | 0,661268336  | 5,966434668 | 2,76126E-10 | 1,42752E-09 |
| YWHAQ     | 0,962806312  | 9,566015584 | 2,78033E-10 | 1,43629E-09 |
| CTSZ      | -0,992249144 | 8,572325036 | 2,79535E-10 | 1,44296E-09 |
| RNF7      | 1,205094011  | 7,260162195 | 2,85136E-10 | 1,47E-09    |
| GPATCH2   | 0,791791498  | 4,679847861 | 2,85205E-10 | 1,47E-09    |
| MRPL11    | 1,251695885  | 6,355117898 | 2,89048E-10 | 1,48869E-09 |
| COX5A     | 1,083692595  | 7,249734535 | 2,90716E-10 | 1,49615E-09 |
| CYTH1     | -0,788772352 | 6,414483194 | 2,93503E-10 | 1,50935E-09 |
| FMNL3     | -1,044865226 | 5,912853386 | 2,95876E-10 | 1,5204E-09  |
| EIF5A2    | 1,655036014  | 5,109883532 | 2,96244E-10 | 1,52115E-09 |
| PMS2CL    | 0,828315331  | 3,671753553 | 2,99992E-10 | 1,53924E-09 |
| AAGAB     | 0,788012681  | 6,508676226 | 3,02622E-10 | 1,55156E-09 |
| TIMP2     | -1,34277297  | 8,60374691  | 3,04203E-10 | 1,5585E-09  |
| ENO1      | 1,114973521  | 11,57393255 | 3,04767E-10 | 1,56021E-09 |
| TMEM106C  | 1,532678395  | 7,286880416 | 3,05803E-10 | 1,56434E-09 |
| UBE2G2    | -0,652687357 | 6,359417566 | 3,06077E-10 | 1,56457E-09 |
| MEA1      | 0,836996027  | 6,600296513 | 3,0707E-10  | 1,56847E-09 |
| DDX47     | 0,865879848  | 6,832117172 | 3,10158E-10 | 1,58306E-09 |
| FARSA     | 0,907875251  | 6,634965408 | 3,20792E-10 | 1,63552E-09 |
| GTF2H3    | 0,838215096  | 4,912428831 | 3,20916E-10 | 1,63552E-09 |
| LHFPL2    | -1,04966791  | 6,146131784 | 3,21783E-10 | 1,63871E-09 |
| H1FO      | 1,324652655  | 8,726631267 | 3,2303E-10  | 1,64384E-09 |
| LRRC8D    | 1,212012982  | 6,309596192 | 3,2537E-10  | 1,65451E-09 |
| GLB1      | -0,687618311 | 6,581944172 | 3,25681E-10 | 1,65486E-09 |
| MAD2L2    | 1,32666447   | 5,82638218  | 3,30102E-10 | 1,67607E-09 |
| YY1       | 0,726637409  | 6,874821193 | 3,34896E-10 | 1,69915E-09 |
| SERPINE2  | 2,514002897  | 7,050794023 | 3,35204E-10 | 1,69945E-09 |

|          |              |             |             |             |
|----------|--------------|-------------|-------------|-------------|
| LSM2     | 1,331231611  | 6,339736588 | 3,43586E-10 | 1,74065E-09 |
| SMC2     | 1,15303658   | 5,9423655   | 3,58405E-10 | 1,81438E-09 |
| HLTF     | 1,341762725  | 6,443624502 | 3,58763E-10 | 1,81484E-09 |
| DDX3X    | -0,629086532 | 8,65950015  | 3,66914E-10 | 1,8547E-09  |
| NFATC3   | -0,730052254 | 5,824604017 | 3,75618E-10 | 1,89729E-09 |
| NDUFA9   | 1,055557024  | 7,038678994 | 3,81088E-10 | 1,9235E-09  |
| STX3     | -0,87768274  | 5,881816099 | 3,8143E-10  | 1,92379E-09 |
| NVL      | 0,605798748  | 5,110778637 | 3,87909E-10 | 1,95503E-09 |
| UBE2E3   | 0,810336575  | 6,802195903 | 3,91234E-10 | 1,97033E-09 |
| ZNF581   | 1,136372957  | 4,819281701 | 3,95822E-10 | 1,99196E-09 |
| PHB2     | 1,052241279  | 8,52125643  | 4,00265E-10 | 2,01284E-09 |
| PEA15    | -0,738435498 | 8,191169754 | 4,05864E-10 | 2,03949E-09 |
| CCT2     | 1,194254098  | 8,217131645 | 4,08212E-10 | 2,04978E-09 |
| SLC1A5   | 1,344222876  | 8,698866782 | 4,18515E-10 | 2,09997E-09 |
| ENOPH1   | 0,811753328  | 6,333460481 | 4,22525E-10 | 2,11853E-09 |
| DUSP18   | -0,759343027 | 3,583350538 | 4,3534E-10  | 2,18118E-09 |
| PUS7L    | 1,081929236  | 3,981437022 | 4,4127E-10  | 2,20927E-09 |
| TRIM28   | 0,986250995  | 8,907753477 | 4,45039E-10 | 2,2265E-09  |
| PABPC1L  | 2,111955698  | 4,088414029 | 4,48961E-10 | 2,24447E-09 |
| ATIC     | 0,874733536  | 6,962596956 | 4,51588E-10 | 2,25595E-09 |
| NET1     | 1,316835245  | 7,691790378 | 4,68403E-10 | 2,33824E-09 |
| WDR5     | 0,906326961  | 6,245583459 | 4,75288E-10 | 2,37088E-09 |
| KPNA4    | 0,897957702  | 7,800265945 | 4,76421E-10 | 2,37479E-09 |
| KDM5B    | 0,987424694  | 7,401242779 | 4,77321E-10 | 2,37754E-09 |
| CIRBP    | -0,843318232 | 7,558123431 | 4,83585E-10 | 2,40698E-09 |
| FTO      | -0,659340141 | 6,089547483 | 4,84024E-10 | 2,40741E-09 |
| SCNM1    | 0,962959357  | 5,49524453  | 4,97588E-10 | 2,47307E-09 |
| NIP7     | 0,951196808  | 5,980604149 | 5,16193E-10 | 2,56367E-09 |
| FGFR1OP  | 1,026103573  | 3,759318275 | 5,16589E-10 | 2,56377E-09 |
| MAN2B2   | -0,85626876  | 6,404591914 | 5,17327E-10 | 2,56557E-09 |
| PSMB5    | 0,95122068   | 7,553391181 | 5,31901E-10 | 2,63592E-09 |
| ETF1     | -0,538327446 | 7,635690262 | 5,64057E-10 | 2,79325E-09 |
| KRT19    | 2,277995609  | 10,29956359 | 5,64568E-10 | 2,79375E-09 |
| FANCF    | 1,014660829  | 4,736141876 | 5,68383E-10 | 2,81059E-09 |
| C10orf76 | -0,587791695 | 5,39348421  | 5,71303E-10 | 2,82298E-09 |
| VPS25    | 0,819459483  | 6,386793586 | 5,72899E-10 | 2,82882E-09 |
| ATXN1L   | -0,798541002 | 6,118712963 | 5,88471E-10 | 2,90361E-09 |
| SEMA4B   | 1,963239346  | 8,581297311 | 5,89718E-10 | 2,90765E-09 |
| MYNN     | 1,310807874  | 6,067561381 | 5,98459E-10 | 2,94862E-09 |
| ANAPC5   | 0,744294166  | 7,699151209 | 6,02204E-10 | 2,96493E-09 |
| RBBP8    | 1,412047734  | 6,834178199 | 6,06789E-10 | 2,98535E-09 |
| ELF1     | -0,675518076 | 6,646410753 | 6,24269E-10 | 3,06913E-09 |
| RPL35A   | 1,340198386  | 10,15549203 | 6,25564E-10 | 3,07329E-09 |
| USP28    | 1,078442553  | 5,809128541 | 6,26205E-10 | 3,07422E-09 |
| RPS6KA3  | -0,905378512 | 6,913807393 | 6,28676E-10 | 3,08413E-09 |
| SATB1    | -1,043779832 | 4,807163035 | 6,33403E-10 | 3,10508E-09 |
| SSRP1    | 0,789073845  | 8,357942815 | 6,37406E-10 | 3,12247E-09 |
| LIPA     | -1,132748868 | 7,773464597 | 6,39163E-10 | 3,12882E-09 |
| GEMIN6   | 1,090579991  | 4,019800566 | 6,56935E-10 | 3,21352E-09 |
| ADCY7    | -1,024731777 | 5,906726136 | 6,59176E-10 | 3,22217E-09 |

|          |              |             |             |             |
|----------|--------------|-------------|-------------|-------------|
| RASAL2   | -0,898486897 | 5,580309427 | 6,72417E-10 | 3,28454E-09 |
| SEPP1    | -1,531149625 | 8,573865392 | 6,83091E-10 | 3,334E-09   |
| RAB10    | 0,803022869  | 8,522563303 | 6,83522E-10 | 3,334E-09   |
| F13A1    | -1,603760713 | 6,149166794 | 6,84648E-10 | 3,33711E-09 |
| PSMD4    | 0,751153099  | 7,802054303 | 6,95447E-10 | 3,38732E-09 |
| TFE3     | -0,570344498 | 6,514805161 | 7,08133E-10 | 3,44665E-09 |
| CASD1    | -0,855581487 | 4,924222084 | 7,25224E-10 | 3,52732E-09 |
| GNA11    | -0,793880168 | 5,141692927 | 7,36778E-10 | 3,58096E-09 |
| EMG1     | 1,314733296  | 6,355851479 | 7,44929E-10 | 3,618E-09   |
| ANO10    | -0,649708525 | 5,126892317 | 7,66746E-10 | 3,72131E-09 |
| ABCE1    | 0,685921174  | 7,090230763 | 7,67407E-10 | 3,72187E-09 |
| FBF1     | 0,950383784  | 5,302600121 | 7,72238E-10 | 3,74264E-09 |
| EIF2B5   | 1,346553609  | 7,142356273 | 7,75592E-10 | 3,75622E-09 |
| TIA1     | 1,032482925  | 6,696698493 | 7,85554E-10 | 3,80177E-09 |
| BTN3A2   | -1,113784938 | 6,283859705 | 8,0529E-10  | 3,89452E-09 |
| ATP5B    | 0,759310709  | 10,01634042 | 8,08702E-10 | 3,90825E-09 |
| YEATS2   | 1,517866005  | 7,437049726 | 8,12775E-10 | 3,92515E-09 |
| C3orf17  | 0,839390601  | 6,398613556 | 8,38565E-10 | 4,04683E-09 |
| DEK      | 0,828140597  | 7,992813966 | 8,39987E-10 | 4,05083E-09 |
| SIRT1    | -0,74981633  | 4,869022004 | 8,44631E-10 | 4,07035E-09 |
| SLC43A3  | -1,363572742 | 6,252322156 | 8,70165E-10 | 4,19043E-09 |
| EIF2S2   | 0,67589019   | 7,779500915 | 8,81681E-10 | 4,2429E-09  |
| GLIS2    | -1,187847499 | 5,248736732 | 9,06447E-10 | 4,359E-09   |
| UTP18    | 0,777211864  | 6,191288323 | 9,31094E-10 | 4,47437E-09 |
| JAG1     | 1,901699527  | 8,589042702 | 9,36229E-10 | 4,49588E-09 |
| FRRS1    | 1,630908158  | 4,922046459 | 9,51613E-10 | 4,56654E-09 |
| ZNF639   | 1,303361786  | 6,535658503 | 9,54633E-10 | 4,57781E-09 |
| ISCU     | -0,671052778 | 6,411678735 | 9,70249E-10 | 4,64942E-09 |
| CXorf40B | 0,692125576  | 5,027000369 | 9,75794E-10 | 4,67271E-09 |
| SMO      | 2,131647991  | 5,994390922 | 9,76943E-10 | 4,67493E-09 |
| LIG3     | 1,057937416  | 5,778573318 | 9,85461E-10 | 4,71238E-09 |
| PDSS1    | 1,103296371  | 3,442783168 | 9,92247E-10 | 4,74151E-09 |
| CLK2     | 0,798890179  | 5,589894009 | 9,98383E-10 | 4,76749E-09 |
| NAA10    | 0,954731772  | 6,234044551 | 1,03017E-09 | 4,91583E-09 |
| C22orf13 | -0,593172583 | 7,111722122 | 1,0364E-09  | 4,94212E-09 |
| PPP4C    | 0,941828534  | 7,396240095 | 1,04583E-09 | 4,98361E-09 |
| RGPD8    | -0,758623835 | 3,097276495 | 1,05773E-09 | 5,03677E-09 |
| C10orf11 | -1,261611384 | 2,752155614 | 1,06002E-09 | 5,04415E-09 |
| LYPLA1   | 1,494734482  | 7,765870794 | 1,06917E-09 | 5,08414E-09 |
| FKBP5    | -1,246482314 | 6,847547062 | 1,07769E-09 | 5,12109E-09 |
| SNX29    | -0,940111276 | 5,249216846 | 1,08012E-09 | 5,12909E-09 |
| MAPK9    | -0,638509442 | 5,713384058 | 1,08544E-09 | 5,15072E-09 |
| NDEL1    | -0,660108832 | 5,850501518 | 1,10394E-09 | 5,23489E-09 |
| ZNF326   | 0,758530928  | 4,843543027 | 1,11582E-09 | 5,28754E-09 |
| ISG20L2  | 0,684355608  | 6,141407606 | 1,11713E-09 | 5,29007E-09 |
| AUP1     | 0,81476664   | 7,880038329 | 1,15424E-09 | 5,462E-09   |
| PDPK1    | -0,731399303 | 6,04788196  | 1,17123E-09 | 5,53857E-09 |
| PSMD3    | 0,844744501  | 7,979617214 | 1,17534E-09 | 5,55415E-09 |
| TBCE     | 0,95649142   | 5,264592478 | 1,17665E-09 | 5,55652E-09 |
| TATDN1   | 0,93952828   | 4,954822295 | 1,20035E-09 | 5,66451E-09 |



|          |              |             |             |             |
|----------|--------------|-------------|-------------|-------------|
| PTDSS1   | 1,364235395  | 8,204730403 | 1,20988E-09 | 5,7055E-09  |
| BAZ2B    | -0,744739327 | 5,266176267 | 1,22287E-09 | 5,76279E-09 |
| ARHGAP15 | -1,361921112 | 3,426511532 | 1,2365E-09  | 5,82301E-09 |
| IQCB1    | 1,210114882  | 5,752093986 | 1,24939E-09 | 5,87641E-09 |
| BCS1L    | 0,863603297  | 4,662578203 | 1,24957E-09 | 5,87641E-09 |
| ABCB6    | 1,71329983   | 6,593177247 | 1,27347E-09 | 5,98469E-09 |
| STK4     | -0,640932497 | 6,240307551 | 1,28785E-09 | 6,04808E-09 |
| MRPS11   | 0,870427049  | 5,428612839 | 1,29182E-09 | 6,06259E-09 |
| TCEB3    | -0,602824365 | 6,667573443 | 1,31348E-09 | 6,16E-09    |
| ADSS     | 0,818730252  | 7,00060467  | 1,33074E-09 | 6,23439E-09 |
| RAD9A    | 0,962748519  | 4,36651788  | 1,33117E-09 | 6,23439E-09 |
| METTL2B  | 0,767634842  | 5,115262282 | 1,38053E-09 | 6,4611E-09  |
| NUP35    | 0,869906654  | 4,468261366 | 1,39542E-09 | 6,5263E-09  |
| RPS2     | 0,907768326  | 11,00039347 | 1,40159E-09 | 6,54865E-09 |
| GLRX     | -1,288081174 | 5,128531148 | 1,40212E-09 | 6,54865E-09 |
| PSME4    | 0,760874414  | 7,497324926 | 1,42733E-09 | 6,66183E-09 |
| NUDCD1   | 0,933162799  | 5,592645978 | 1,44727E-09 | 6,75029E-09 |
| PMM2     | 0,751511595  | 6,184389441 | 1,45664E-09 | 6,78934E-09 |
| CRTAP    | -0,783923518 | 7,883877316 | 1,48961E-09 | 6,93364E-09 |
| C12orf52 | 0,760233628  | 5,031755588 | 1,48963E-09 | 6,93364E-09 |
| NOP16    | 1,016444467  | 4,847017842 | 1,51492E-09 | 7,04655E-09 |
| ARSB     | -0,781666624 | 4,983724982 | 1,52744E-09 | 7,09993E-09 |
| FRMD4A   | -1,273233512 | 4,929723068 | 1,54412E-09 | 7,17261E-09 |
| TBRG1    | -0,552667163 | 5,557206634 | 1,57668E-09 | 7,31884E-09 |
| PRPF4    | 1,01043947   | 6,358514574 | 1,59906E-09 | 7,4177E-09  |
| IGF2BP2  | 2,49341714   | 6,815509496 | 1,60593E-09 | 7,4445E-09  |
| RNPEPL1  | -0,715069002 | 6,864904234 | 1,60854E-09 | 7,45151E-09 |
| TMEM99   | 1,27006029   | 4,692347461 | 1,61023E-09 | 7,45428E-09 |
| TAF3     | -0,694546571 | 3,622979225 | 1,63297E-09 | 7,55444E-09 |
| EPB41L3  | -1,444131928 | 5,364104169 | 1,63488E-09 | 7,55815E-09 |
| FOXO1    | -0,909681221 | 5,831287314 | 1,65186E-09 | 7,63146E-09 |
| MRPS16   | 0,847726365  | 7,191883569 | 1,67239E-09 | 7,72108E-09 |
| GFM1     | 0,798910659  | 6,818587494 | 1,69444E-09 | 7,81756E-09 |
| RPE      | 0,808252902  | 5,891502353 | 1,71011E-09 | 7,88454E-09 |
| TMEM41A  | 1,067632109  | 6,711343907 | 1,71995E-09 | 7,92453E-09 |
| CLDN1    | 3,402182178  | 9,832496449 | 1,73521E-09 | 7,98948E-09 |
| FKBP3    | 1,040159377  | 6,339709286 | 1,74109E-09 | 8,01115E-09 |
| SLBP     | 0,953707992  | 6,51551585  | 1,79256E-09 | 8,23809E-09 |
| SON      | -0,70560596  | 8,106729544 | 1,79283E-09 | 8,23809E-09 |
| DHFR     | 1,047945979  | 6,139097119 | 1,79609E-09 | 8,24748E-09 |
| CST3     | -0,935413204 | 8,020442432 | 1,81401E-09 | 8,3242E-09  |
| LCP2     | -1,264880277 | 5,582941477 | 1,82895E-09 | 8,3871E-09  |
| SMS      | 1,304031486  | 7,623996727 | 1,85215E-09 | 8,48779E-09 |
| ABCF3    | 1,181282678  | 7,143827866 | 1,8734E-09  | 8,57938E-09 |
| TAF1D    | 0,949911169  | 5,687859263 | 1,87533E-09 | 8,58247E-09 |
| DUT      | 1,035114037  | 6,342627532 | 1,88234E-09 | 8,60875E-09 |
| ZNF107   | 1,035429819  | 3,919997343 | 1,89307E-09 | 8,65204E-09 |
| RHOBTB1  | -1,065692402 | 4,368557153 | 1,91609E-09 | 8,75137E-09 |
| TFDP1    | 1,106998822  | 7,42002935  | 1,92812E-09 | 8,80046E-09 |
| SNRPD3   | 0,791694309  | 7,083000579 | 1,96685E-09 | 8,9688E-09  |

|           |              |             |             |             |
|-----------|--------------|-------------|-------------|-------------|
| DNAJC3    | -0,70866812  | 6,962383059 | 1,96764E-09 | 8,9688E-09  |
| RPS19     | 1,223376956  | 10,39889119 | 1,98681E-09 | 9,05015E-09 |
| IGFBP3    | 2,853801182  | 9,690741904 | 1,99764E-09 | 9,09339E-09 |
| AP1S2     | -1,04600382  | 5,062258172 | 2,00999E-09 | 9,14351E-09 |
| MARCH8    | -0,887801591 | 3,860702443 | 2,01639E-09 | 9,16651E-09 |
| PGM2      | 1,226801262  | 6,491651525 | 2,04502E-09 | 9,29047E-09 |
| PDXP      | 1,204262099  | 3,704523536 | 2,06178E-09 | 9,36039E-09 |
| NDUFB9    | 1,154183067  | 7,884827428 | 2,0662E-09  | 9,37421E-09 |
| PRMT5     | 0,86159332   | 6,86664845  | 2,07243E-09 | 9,39621E-09 |
| ERAL1     | 0,769117117  | 6,401424181 | 2,07684E-09 | 9,40994E-09 |
| TMEM115   | -0,518908354 | 5,659289164 | 2,11389E-09 | 9,57145E-09 |
| PSMA4     | 0,869541322  | 7,759500489 | 2,17377E-09 | 9,83102E-09 |
| SMPD4     | 0,725430069  | 7,008283766 | 2,1741E-09  | 9,83102E-09 |
| TMOD3     | -0,641028181 | 7,094943278 | 2,20089E-09 | 9,94557E-09 |
| MGAT4A    | -1,207035267 | 5,658318039 | 2,26175E-09 | 1,02138E-08 |
| PLP2      | 1,231629517  | 8,348552992 | 2,32731E-09 | 1,05029E-08 |
| PIAS1     | -0,570720115 | 4,935032844 | 2,33506E-09 | 1,05309E-08 |
| C2orf49   | 0,912764194  | 3,752292243 | 2,36061E-09 | 1,06391E-08 |
| MRPL21    | 1,2114605    | 5,736878142 | 2,43026E-09 | 1,09458E-08 |
| SNRNP70   | 0,703845257  | 7,241269361 | 2,45268E-09 | 1,10395E-08 |
| SDC1      | 1,585103883  | 10,2732614  | 2,5129E-09  | 1,13031E-08 |
| TRAF4     | 1,195994068  | 6,973830594 | 2,51476E-09 | 1,1304E-08  |
| VMA21     | 0,799654774  | 6,743462571 | 2,5607E-09  | 1,15029E-08 |
| AHSA1     | 0,721517575  | 7,198857762 | 2,65033E-09 | 1,18977E-08 |
| C10orf116 | -1,864851832 | 5,66688134  | 2,69461E-09 | 1,20885E-08 |
| PSMB3     | 1,102046521  | 7,608829494 | 2,71251E-09 | 1,21608E-08 |
| CHIC1     | -0,782927788 | 3,63742179  | 2,71889E-09 | 1,21814E-08 |
| CEP78     | 0,894782464  | 4,359131741 | 2,7515E-09  | 1,23194E-08 |
| SLC26A6   | 1,042202276  | 4,135093345 | 2,79958E-09 | 1,25265E-08 |
| MFAP2     | 2,026036555  | 6,575930518 | 2,81393E-09 | 1,25824E-08 |
| ERGIC2    | 0,943791709  | 6,240870329 | 2,8346E-09  | 1,26665E-08 |
| NAA20     | 1,190451372  | 6,993339479 | 2,84076E-09 | 1,26857E-08 |
| TRUB1     | 0,907665703  | 5,454739577 | 2,89642E-09 | 1,29252E-08 |
| FAM58A    | 1,08797637   | 5,359199265 | 2,89818E-09 | 1,29252E-08 |
| WDR18     | 0,924268529  | 5,638215749 | 2,94091E-09 | 1,31073E-08 |
| TRIM21    | -0,791608741 | 5,066491969 | 2,97706E-09 | 1,32597E-08 |
| TBC1D1    | -0,892912042 | 5,865356502 | 2,98121E-09 | 1,32695E-08 |
| CDC42BPA  | -0,883781548 | 6,03218107  | 2,99539E-09 | 1,33239E-08 |
| CBX4      | 1,002683006  | 5,45593945  | 3,11117E-09 | 1,38299E-08 |
| WAPAL     | -0,520222086 | 6,344691716 | 3,11994E-09 | 1,38551E-08 |
| DDX10     | 0,888706704  | 5,747625252 | 3,12089E-09 | 1,38551E-08 |
| EIF2C4    | -0,800460289 | 4,612161956 | 3,13751E-09 | 1,39198E-08 |
| MEN1      | 0,740843058  | 5,91230877  | 3,14864E-09 | 1,39601E-08 |
| C3orf18   | -1,021831969 | 2,4319679   | 3,18535E-09 | 1,41136E-08 |
| CCDC51    | 1,15389273   | 4,845343071 | 3,1915E-09  | 1,41317E-08 |
| PTBP1     | 0,576076484  | 8,517142758 | 3,22718E-09 | 1,42804E-08 |
| UBL4A     | 0,713791321  | 6,577986206 | 3,24197E-09 | 1,43366E-08 |
| ACP1      | 0,798457039  | 7,081153931 | 3,32771E-09 | 1,47062E-08 |
| TMEM138   | 0,598807237  | 5,433176929 | 3,39904E-09 | 1,50083E-08 |
| MRPS9     | 0,681011621  | 5,22547297  | 3,40048E-09 | 1,50083E-08 |

|          |              |             |             |             |
|----------|--------------|-------------|-------------|-------------|
| ZYX      | -0,916873075 | 8,095459894 | 3,47541E-09 | 1,53291E-08 |
| RASA3    | -1,098090858 | 4,656623385 | 3,49234E-09 | 1,53938E-08 |
| ESYT1    | -0,61016774  | 7,653217758 | 3,56882E-09 | 1,57208E-08 |
| GAN      | 1,373769302  | 2,949112645 | 3,58559E-09 | 1,57845E-08 |
| COX6A1   | 1,168150288  | 8,265073969 | 3,62455E-09 | 1,59457E-08 |
| PFDN2    | 1,118922041  | 6,357056951 | 3,73718E-09 | 1,64306E-08 |
| ANKZF1   | 0,79988321   | 5,418976836 | 3,84367E-09 | 1,68879E-08 |
| MTX1     | 0,832594181  | 5,672549568 | 3,85026E-09 | 1,6906E-08  |
| ICT1     | 1,188893679  | 5,221838487 | 3,86017E-09 | 1,69386E-08 |
| MRPS23   | 1,097542899  | 6,369690704 | 3,86695E-09 | 1,69574E-08 |
| AP2M1    | 1,187962491  | 9,937105522 | 3,88544E-09 | 1,70275E-08 |
| DPH3     | -0,791129289 | 5,301957794 | 3,91013E-09 | 1,71247E-08 |
| ATP5G3   | 1,111130921  | 8,23991158  | 3,93378E-09 | 1,72172E-08 |
| MRPS17   | 1,3877318    | 4,817805182 | 3,94073E-09 | 1,72366E-08 |
| HSD17B10 | 0,868014707  | 6,774456974 | 3,97133E-09 | 1,73593E-08 |
| HAT1     | 0,710129945  | 6,458043979 | 4,01355E-09 | 1,75326E-08 |
| STRBP    | 1,331865438  | 5,94627272  | 4,14243E-09 | 1,8084E-08  |
| HMGB2    | 1,117788218  | 7,183104244 | 4,16457E-09 | 1,8169E-08  |
| ANKRD12  | -0,742318555 | 5,615467071 | 4,17299E-09 | 1,81941E-08 |
| FAM100B  | 1,008038784  | 6,476408781 | 4,27743E-09 | 1,86376E-08 |
| BAK1     | 1,167686939  | 6,438569137 | 4,39195E-09 | 1,91243E-08 |
| PSMA2    | 0,857104477  | 7,629190418 | 4,42201E-09 | 1,92429E-08 |
| HABP4    | -0,985826962 | 3,848516095 | 4,46447E-09 | 1,94153E-08 |
| RGPD6    | -0,705710296 | 4,751114292 | 4,48319E-09 | 1,94843E-08 |
| ASAP3    | -0,950289126 | 4,949454237 | 4,50886E-09 | 1,95834E-08 |
| POLDIP2  | 0,70106631   | 7,534351719 | 4,6853E-09  | 2,03368E-08 |
| DOCK10   | -1,295733351 | 4,595195073 | 4,69689E-09 | 2,03741E-08 |
| ZNF280C  | 1,169481609  | 3,938805835 | 4,74889E-09 | 2,05866E-08 |
| TSEN15   | 1,151150324  | 6,355023296 | 4,8356E-09  | 2,09491E-08 |
| MGC57346 | 0,980673908  | 4,216482079 | 4,90679E-09 | 2,12441E-08 |
| SCARB2   | -0,723843483 | 8,453031197 | 4,93059E-09 | 2,13336E-08 |
| TRMT112  | 0,894438467  | 7,643778601 | 4,9443E-09  | 2,13793E-08 |
| NONO     | 0,667676901  | 9,182355926 | 4,9696E-09  | 2,14751E-08 |
| ACAA2    | -1,233305227 | 5,912309096 | 4,98583E-09 | 2,15316E-08 |
| SYNRG    | -0,602417611 | 6,03502144  | 4,99953E-09 | 2,15771E-08 |
| DHX36    | 0,884637283  | 6,773135505 | 5,03585E-09 | 2,17109E-08 |
| DLG1     | 1,019575035  | 7,397700835 | 5,03691E-09 | 2,17109E-08 |
| SNHG11   | 0,943867385  | 3,533954757 | 5,09148E-09 | 2,19323E-08 |
| POLR2F   | 1,018340041  | 5,99525018  | 5,17578E-09 | 2,22813E-08 |
| MLKL     | -1,047966577 | 4,138099779 | 5,22754E-09 | 2,249E-08   |
| MTMR6    | -0,790615311 | 5,824054617 | 5,25769E-09 | 2,26054E-08 |
| IL10RA   | -1,31881445  | 5,575156835 | 5,30546E-09 | 2,27964E-08 |
| PHTF2    | 0,948667842  | 5,995426297 | 5,31944E-09 | 2,28421E-08 |
| GCA      | -0,966301947 | 5,103925731 | 5,47122E-09 | 2,34791E-08 |
| GATC     | 0,990565979  | 2,660915399 | 5,52546E-09 | 2,36969E-08 |
| MORC2    | 0,902142411  | 6,447254291 | 5,6288E-09  | 2,4125E-08  |
| CSF1R    | -1,313299925 | 6,498879178 | 5,644E-09   | 2,41749E-08 |
| PLXNA2   | -1,359484157 | 6,237564935 | 5,65001E-09 | 2,41854E-08 |
| ELN      | -1,813938269 | 6,455438591 | 5,75474E-09 | 2,46183E-08 |
| COPS5    | 0,783561941  | 6,523417148 | 5,76593E-09 | 2,46507E-08 |

|          |              |             |             |             |
|----------|--------------|-------------|-------------|-------------|
| FAM20A   | -1,330534237 | 5,057770464 | 5,81347E-09 | 2,48384E-08 |
| CHD2     | -0,714786726 | 6,863573755 | 6,02732E-09 | 2,57359E-08 |
| PCSK7    | -0,66114113  | 5,511739147 | 6,06412E-09 | 2,58769E-08 |
| MARS2    | 1,029848478  | 4,150404841 | 6,09069E-09 | 2,5974E-08  |
| RAB5A    | -0,554431439 | 6,092354332 | 6,16664E-09 | 2,62815E-08 |
| FYTTD1   | 0,937093188  | 7,650855013 | 6,2545E-09  | 2,66393E-08 |
| INO80B   | 0,714495749  | 5,322430141 | 6,30861E-09 | 2,68529E-08 |
| NDUFA4L2 | 2,973177962  | 8,067510527 | 6,32475E-09 | 2,69048E-08 |
| C10orf35 | 1,187988467  | 4,106403958 | 6,53693E-09 | 2,77901E-08 |
| TIPARP   | -1,191086226 | 6,693729557 | 6,55243E-09 | 2,78386E-08 |
| ALDOC    | 1,643793866  | 6,521955308 | 6,65173E-09 | 2,8243E-08  |
| ABI3     | -1,176475711 | 4,138665695 | 6,79853E-09 | 2,88483E-08 |
| SBDSP1   | -0,649408445 | 4,968118558 | 6,81586E-09 | 2,89038E-08 |
| RRP1     | 0,889868396  | 5,546337929 | 6,83206E-09 | 2,89516E-08 |
| U2AF2    | 0,717270667  | 7,855807933 | 6,83561E-09 | 2,89516E-08 |
| PCNX     | -0,736911033 | 6,183571122 | 6,8617E-09  | 2,9044E-08  |
| RYK      | 0,959593702  | 7,22641891  | 6,87787E-09 | 2,90944E-08 |
| IMP4     | 0,879220035  | 6,072686377 | 6,9266E-09  | 2,92824E-08 |
| UBE2O    | 0,865754862  | 6,19063727  | 6,95671E-09 | 2,93915E-08 |
| TSPAN6   | 1,328893664  | 6,610692432 | 6,96612E-09 | 2,9413E-08  |
| CD63     | -0,814055327 | 9,50806858  | 7,03145E-09 | 2,96705E-08 |
| LRRFIP2  | -0,612918526 | 5,561008511 | 7,04283E-09 | 2,97001E-08 |
| PIAS3    | 0,932698935  | 6,41366584  | 7,06612E-09 | 2,97799E-08 |
| ANKMY1   | -0,772937489 | 3,52399303  | 7,13705E-09 | 3,00602E-08 |
| EIF4EBP2 | -0,686696007 | 7,799946365 | 7,16113E-09 | 3,0143E-08  |
| GPSM2    | 0,961529768  | 5,531447564 | 7,21017E-09 | 3,03308E-08 |
| PRDX4    | 1,282518594  | 7,511203514 | 7,24151E-09 | 3,04438E-08 |
| GOLGA4   | -0,781299992 | 6,548979696 | 7,30281E-09 | 3,06826E-08 |
| CAND1    | 0,868487823  | 7,931654067 | 7,42962E-09 | 3,11962E-08 |
| NDE1     | 1,043497401  | 5,870748392 | 7,54176E-09 | 3,16381E-08 |
| C5orf22  | 0,853513386  | 5,933167751 | 7,54416E-09 | 3,16381E-08 |
| STAT3    | -0,721582583 | 8,65818811  | 7,61513E-09 | 3,19161E-08 |
| TMEM43   | -0,616099439 | 7,416377933 | 7,79069E-09 | 3,26319E-08 |
| AMMECR1  | 1,248287451  | 5,480107403 | 7,90753E-09 | 3,31009E-08 |
| SNTB1    | -1,536754549 | 5,45817702  | 7,93804E-09 | 3,32083E-08 |
| SUN2     | -0,795993106 | 7,786115859 | 7,99899E-09 | 3,34428E-08 |
| SAE1     | 0,766555773  | 7,485462996 | 8,18E-09    | 3,41786E-08 |
| LIX1L    | -0,954627138 | 5,197098172 | 8,21409E-09 | 3,43E-08    |
| SMC6     | 1,076371046  | 6,181733753 | 8,26932E-09 | 3,45095E-08 |
| TIMM17B  | 1,120826165  | 5,972288294 | 8,27467E-09 | 3,45107E-08 |
| FGL2     | -1,396954384 | 5,680618075 | 8,35043E-09 | 3,48053E-08 |
| POLD1    | 1,058469033  | 5,709109557 | 8,45294E-09 | 3,52111E-08 |
| UBE2M    | 0,814196122  | 6,539267782 | 8,47278E-09 | 3,52722E-08 |
| POLE     | 1,140745257  | 5,979881141 | 8,49909E-09 | 3,53601E-08 |
| ERH      | 0,946438422  | 7,280406157 | 8,52258E-09 | 3,54363E-08 |
| SRM      | 0,868428715  | 6,55872455  | 8,57639E-09 | 3,56383E-08 |
| ZNF706   | 0,831029057  | 6,940937927 | 8,66201E-09 | 3,59721E-08 |
| CDC123   | 0,715183497  | 6,557918531 | 8,68184E-09 | 3,60326E-08 |
| COX8A    | 0,890723235  | 7,583411202 | 8,89713E-09 | 3,69036E-08 |
| TRPT1    | 0,863874028  | 4,81962256  | 8,95558E-09 | 3,71235E-08 |

|          |              |             |             |             |
|----------|--------------|-------------|-------------|-------------|
| ZNHIT3   | 0,836823134  | 5,581136355 | 9,00876E-09 | 3,73212E-08 |
| ZC3H15   | 0,700538855  | 6,892665605 | 9,06606E-09 | 3,75295E-08 |
| S100A16  | 1,703580087  | 8,715999647 | 9,07004E-09 | 3,75295E-08 |
| MYL12A   | -0,778805511 | 8,737780832 | 9,0994E-09  | 3,76282E-08 |
| CBR3     | 2,931693923  | 5,454248201 | 9,24318E-09 | 3,81995E-08 |
| COX5B    | 1,283967277  | 7,439633307 | 9,33671E-09 | 3,85627E-08 |
| MTA2     | 0,683532775  | 7,466757712 | 9,83661E-09 | 4,06028E-08 |
| TEX10    | 0,906539396  | 5,405341875 | 9,9821E-09  | 4,11784E-08 |
| GTF2E2   | 0,985948864  | 5,884137162 | 1,00309E-08 | 4,13548E-08 |
| MTG1     | 0,986496082  | 5,272355107 | 1,02754E-08 | 4,23373E-08 |
| SPINT2   | 1,390172337  | 9,736872963 | 1,03804E-08 | 4,2744E-08  |
| MICAL1   | -1,069071303 | 5,241183407 | 1,03916E-08 | 4,27642E-08 |
| RNF34    | 0,57652766   | 5,436322239 | 1,04614E-08 | 4,30257E-08 |
| ZNF217   | 0,935895837  | 6,721915089 | 1,05239E-08 | 4,32565E-08 |
| ERCC5    | -0,696630656 | 5,701088231 | 1,06346E-08 | 4,36852E-08 |
| WDR76    | 1,436861866  | 4,572563199 | 1,06549E-08 | 4,37421E-08 |
| HOMER3   | 1,139094717  | 5,839968035 | 1,07464E-08 | 4,40915E-08 |
| RAD51C   | 0,861179917  | 4,440402692 | 1,07755E-08 | 4,41842E-08 |
| USP21    | 0,816180015  | 5,40046323  | 1,08115E-08 | 4,43052E-08 |
| ITPKC    | -1,10621457  | 6,869360036 | 1,08193E-08 | 4,43103E-08 |
| NME4     | 1,152885707  | 6,724350694 | 1,08263E-08 | 4,43126E-08 |
| NRARP    | 1,931259347  | 5,743873577 | 1,08466E-08 | 4,4369E-08  |
| GPNPAT1  | 0,965077927  | 6,147902616 | 1,09876E-08 | 4,49186E-08 |
| MAGEF1   | 1,418179129  | 6,761419204 | 1,0999E-08  | 4,49385E-08 |
| TRMT1    | 1,021211736  | 5,418847762 | 1,13521E-08 | 4,63388E-08 |
| TTYH3    | 1,118027318  | 7,562565707 | 1,13554E-08 | 4,63388E-08 |
| UBXN2A   | 0,857457658  | 4,999116197 | 1,1371E-08  | 4,63749E-08 |
| BR13     | -0,732946886 | 6,980204965 | 1,15521E-08 | 4,70853E-08 |
| TOR3A    | 1,039992434  | 7,005294077 | 1,15791E-08 | 4,7167E-08  |
| EBNA1BP2 | 0,846249083  | 6,567241541 | 1,20918E-08 | 4,92262E-08 |
| WSB1     | -0,793353472 | 7,070897397 | 1,2153E-08  | 4,9446E-08  |
| PBRM1    | -0,636438636 | 6,056899654 | 1,22108E-08 | 4,96515E-08 |
| COPB2    | 0,796851141  | 8,415671701 | 1,23489E-08 | 5,01831E-08 |
| SEPN1    | -0,729012177 | 7,817784323 | 1,23947E-08 | 5,03392E-08 |
| C3orf37  | 0,904864665  | 6,874482103 | 1,30893E-08 | 5,31285E-08 |
| MRPL24   | 1,08714355   | 6,486928992 | 1,34393E-08 | 5,45167E-08 |
| THOC6    | 0,838578658  | 5,488043152 | 1,34732E-08 | 5,46216E-08 |
| RNH1     | -0,66465344  | 7,777552292 | 1,36984E-08 | 5,55018E-08 |
| MTA1     | 0,958484926  | 6,216024167 | 1,3775E-08  | 5,57789E-08 |
| ID2      | -1,19299627  | 5,948522911 | 1,38548E-08 | 5,60687E-08 |
| ZW10     | 0,804675589  | 5,251220697 | 1,40425E-08 | 5,67947E-08 |
| IARS     | 0,850683707  | 7,876497407 | 1,42692E-08 | 5,76775E-08 |
| TMEM54   | 1,135706287  | 6,633411842 | 1,43083E-08 | 5,78009E-08 |
| TMEM30A  | -0,663318442 | 8,244255187 | 1,45853E-08 | 5,88852E-08 |
| PFDN6    | 0,946792375  | 5,317893214 | 1,49938E-08 | 6,04986E-08 |
| TSEN54   | 0,920073532  | 5,518117657 | 1,50679E-08 | 6,07619E-08 |
| DUS1L    | 0,93513861   | 6,79113329  | 1,53866E-08 | 6,20101E-08 |
| ARMC1    | 0,852469162  | 6,111848785 | 1,53958E-08 | 6,20107E-08 |
| C1orf174 | 0,700500315  | 5,364478708 | 1,55714E-08 | 6,26811E-08 |
| NUDT16   | -0,768524106 | 5,418420575 | 1,59062E-08 | 6,39908E-08 |

|          |              |             |             |             |
|----------|--------------|-------------|-------------|-------------|
| APPL1    | -0,517188185 | 6,134906461 | 1,60253E-08 | 6,44321E-08 |
| ERI2     | 0,842463379  | 4,662419465 | 1,6235E-08  | 6,52366E-08 |
| PDE12    | -0,466336881 | 5,090354253 | 1,63985E-08 | 6,58547E-08 |
| BPHL     | 1,072076143  | 4,715996415 | 1,66179E-08 | 6,66964E-08 |
| ACTR1A   | -0,601264688 | 7,266629754 | 1,66309E-08 | 6,67093E-08 |
| KIAA0247 | -0,714280466 | 7,346129438 | 1,69712E-08 | 6,80343E-08 |
| SENP2    | 1,151636265  | 6,765812563 | 1,69871E-08 | 6,80581E-08 |
| NDUFAB1  | 0,9012361    | 6,335556922 | 1,70588E-08 | 6,83054E-08 |
| DDT      | 1,099709065  | 6,406313778 | 1,74264E-08 | 6,97364E-08 |
| C17orf89 | 1,13903688   | 4,629774955 | 1,83489E-08 | 7,33847E-08 |
| SGMS1    | -0,824336625 | 5,81126571  | 1,86373E-08 | 7,44947E-08 |
| TRIM5    | -0,750871151 | 4,987787975 | 1,87658E-08 | 7,49642E-08 |
| GCLM     | 2,493867667  | 7,161726287 | 1,90126E-08 | 7,59057E-08 |
| MFSD3    | 1,199535897  | 4,439317978 | 1,9036E-08  | 7,59545E-08 |
| TCEAL3   | -0,849202573 | 4,293474056 | 1,9111E-08  | 7,62095E-08 |
| AVL9     | 0,84295743   | 5,092615998 | 1,94932E-08 | 7,76879E-08 |
| TXNDC17  | 1,239151044  | 6,264152617 | 1,95328E-08 | 7,78004E-08 |
| OGDH     | -0,666030473 | 7,634966345 | 1,99732E-08 | 7,95081E-08 |
| ATRX     | -0,701693502 | 6,264347259 | 2,00457E-08 | 7,975E-08   |
| WDR48    | -0,535494618 | 5,491267943 | 2,00966E-08 | 7,99058E-08 |
| PILRB    | 1,35358681   | 5,592781643 | 2,01506E-08 | 8,00741E-08 |
| USP14    | 0,722626893  | 6,978269024 | 2,09569E-08 | 8,32296E-08 |
| MARCKSL1 | 1,368253257  | 7,82075958  | 2,12783E-08 | 8,44567E-08 |
| DDX24    | -0,524655388 | 7,540475632 | 2,1761E-08  | 8,63225E-08 |
| CYCS     | 1,049857607  | 8,185948728 | 2,21523E-08 | 8,78236E-08 |
| PRKDC    | 1,096313104  | 8,650074318 | 2,23578E-08 | 8,85868E-08 |
| PRDX2    | 1,282547852  | 8,244495995 | 2,27135E-08 | 8,99437E-08 |
| OTUD6B   | 0,880379436  | 4,67473947  | 2,27595E-08 | 9,00739E-08 |
| LRP10    | -0,790478397 | 8,043053749 | 2,28582E-08 | 9,0412E-08  |
| RPS6KB2  | 0,903299206  | 6,234161193 | 2,30818E-08 | 9,12096E-08 |
| WBSR22   | 0,759258389  | 6,918624642 | 2,30866E-08 | 9,12096E-08 |
| TNIP1    | -0,656187379 | 7,462449623 | 2,31627E-08 | 9,14571E-08 |
| CEBPD    | -1,06529769  | 6,546932999 | 2,35864E-08 | 9,30763E-08 |
| MDFI     | 1,919567429  | 5,586826844 | 2,38173E-08 | 9,39329E-08 |
| HIFX     | 1,112969009  | 7,565927924 | 2,40451E-08 | 9,47765E-08 |
| PSMD8    | 1,016300947  | 8,209661343 | 2,45773E-08 | 9,68185E-08 |
| SENP3    | 0,669283322  | 6,185445343 | 2,49974E-08 | 9,84166E-08 |
| JUNB     | -1,179110395 | 8,076865869 | 2,51694E-08 | 9,90365E-08 |
| NOP58    | 0,85799876   | 6,768744347 | 2,5271E-08  | 9,9379E-08  |
| UQCRC1   | 0,652380448  | 7,866846673 | 2,55311E-08 | 1,00344E-07 |
| ARF5     | 0,887866103  | 7,906195874 | 2,5751E-08  | 1,0115E-07  |
| MFAP3    | -0,562886093 | 5,714949878 | 2,60152E-08 | 1,0209E-07  |
| CTNNA1   | -1,157793797 | 6,148823223 | 2,60203E-08 | 1,0209E-07  |
| UTP6     | 0,708009447  | 6,055292471 | 2,63255E-08 | 1,03228E-07 |
| USP4     | -0,548053557 | 6,227330279 | 2,64376E-08 | 1,03608E-07 |
| DCAF17   | 0,666228967  | 5,005275316 | 2,65486E-08 | 1,03983E-07 |
| BNIP2    | -0,506913387 | 6,085870916 | 2,65723E-08 | 1,04016E-07 |
| NUDT5    | 0,818217702  | 6,053293707 | 2,71414E-08 | 1,06183E-07 |
| DONSON   | 0,839430152  | 5,512332227 | 2,72483E-08 | 1,0654E-07  |
| CDK5     | 0,930007249  | 4,724744487 | 2,75955E-08 | 1,07836E-07 |

|           |              |             |             |             |
|-----------|--------------|-------------|-------------|-------------|
| MRPS7     | 0,988555061  | 6,942059892 | 2,76295E-08 | 1,07907E-07 |
| XYLT2     | 0,87189557   | 5,993425421 | 2,81176E-08 | 1,09743E-07 |
| TXN       | 1,666740821  | 8,72308835  | 2,81317E-08 | 1,09743E-07 |
| TMEM134   | 1,078773774  | 5,689695195 | 2,81769E-08 | 1,09856E-07 |
| PDLIM4    | 1,806498447  | 5,225214635 | 2,82646E-08 | 1,10135E-07 |
| NANP      | 0,829338632  | 4,272851695 | 2,85116E-08 | 1,11034E-07 |
| CD86      | -1,130855832 | 4,767828406 | 2,87763E-08 | 1,12001E-07 |
| CLDND1    | 1,25431331   | 7,709070365 | 2,90298E-08 | 1,12923E-07 |
| ZFPL1     | 0,708886697  | 5,424491468 | 2,91444E-08 | 1,13304E-07 |
| LAPTM4B   | 1,162686419  | 8,577993472 | 2,93831E-08 | 1,14167E-07 |
| ZNF485    | 0,987862242  | 1,980558626 | 2,9796E-08  | 1,15705E-07 |
| COTL1     | -0,976612573 | 7,576555449 | 2,99256E-08 | 1,16143E-07 |
| ZFYVE9    | -0,795182086 | 5,338497155 | 3,00555E-08 | 1,1658E-07  |
| ALKBH4    | 0,717196161  | 4,151971877 | 3,02143E-08 | 1,1713E-07  |
| MTMR1     | 0,894426521  | 6,289681699 | 3,07724E-08 | 1,19225E-07 |
| TCEB1     | 0,887903157  | 6,383652219 | 3,08791E-08 | 1,19571E-07 |
| TIGD1     | 1,006130434  | 4,093108531 | 3,09367E-08 | 1,19726E-07 |
| FAM3C     | 1,251738284  | 7,791040735 | 3,10101E-08 | 1,19942E-07 |
| FAM174A   | -0,71431054  | 4,344047352 | 3,11096E-08 | 1,20259E-07 |
| ZFYVE26   | -0,792323962 | 5,611655953 | 3,14982E-08 | 1,21692E-07 |
| ERI3      | 0,786221625  | 6,43205967  | 3,17793E-08 | 1,22708E-07 |
| ARPC1A    | 0,921236372  | 8,124150494 | 3,21179E-08 | 1,23946E-07 |
| PIP4K2A   | -0,872120003 | 5,821165428 | 3,25151E-08 | 1,25407E-07 |
| CHCHD2    | 1,256980293  | 8,901951588 | 3,28368E-08 | 1,26577E-07 |
| MAPK12    | 1,42551549   | 4,959313755 | 3,30068E-08 | 1,2716E-07  |
| MRPL19    | 0,595908916  | 6,386425655 | 3,32206E-08 | 1,27912E-07 |
| MCM3      | 1,03863884   | 7,560050673 | 3,41639E-08 | 1,31469E-07 |
| NFIC      | -0,963291427 | 5,367450316 | 3,43515E-08 | 1,32117E-07 |
| IER5L     | 1,656994147  | 4,328119479 | 3,44699E-08 | 1,32497E-07 |
| BRCA2     | 1,177891322  | 3,658770449 | 3,50994E-08 | 1,34841E-07 |
| ATG2B     | -0,678390316 | 5,288048913 | 3,54561E-08 | 1,36134E-07 |
| C11orf73  | 0,739287507  | 5,337539433 | 3,56999E-08 | 1,36993E-07 |
| MLST8     | 0,778560624  | 5,991765357 | 3,60662E-08 | 1,38321E-07 |
| ATP5J2    | 1,278384564  | 7,456862175 | 3,69396E-08 | 1,41592E-07 |
| ATP13A3   | 0,887588735  | 7,890308173 | 3,72254E-08 | 1,42607E-07 |
| ZC3HAV1   | -0,562740074 | 6,355182055 | 3,73972E-08 | 1,43184E-07 |
| MRPS2     | 0,766890323  | 5,890358501 | 3,7959E-08  | 1,45254E-07 |
| COX6B1    | 1,06363582   | 8,034474038 | 3,8019E-08  | 1,45402E-07 |
| TMEM106A  | -0,876712424 | 3,251818192 | 3,82611E-08 | 1,46246E-07 |
| RNF2      | 0,781048491  | 5,676859859 | 3,85547E-08 | 1,47269E-07 |
| APAF1     | -0,602988842 | 4,841976036 | 3,85721E-08 | 1,47269E-07 |
| FBXL6     | 1,081778634  | 4,77745817  | 3,91504E-08 | 1,49394E-07 |
| ANXA11    | -0,725420448 | 8,037688194 | 3,95496E-08 | 1,50833E-07 |
| PFKFB3    | -0,962096254 | 7,285278921 | 3,97919E-08 | 1,51672E-07 |
| SNAI2     | 1,733650127  | 6,17025829  | 3,98858E-08 | 1,51886E-07 |
| YKT6      | 0,712949211  | 7,460235353 | 3,98927E-08 | 1,51886E-07 |
| CIITA     | -1,340572249 | 4,571314909 | 4,00233E-08 | 1,52299E-07 |
| C10orf118 | -0,725270625 | 4,860837355 | 4,04182E-08 | 1,53716E-07 |
| POLR3K    | 0,988228428  | 4,948466512 | 4,08947E-08 | 1,55441E-07 |
| GMCL1     | 0,834737731  | 5,104017247 | 4,0988E-08  | 1,55709E-07 |

|           |              |             |             |             |
|-----------|--------------|-------------|-------------|-------------|
| BUD31     | 0,925725427  | 6,754645624 | 4,18969E-08 | 1,59073E-07 |
| PDXK      | -0,836076592 | 7,398559496 | 4,22026E-08 | 1,60144E-07 |
| TSPYL1    | -0,588385523 | 6,999114767 | 4,22683E-08 | 1,60304E-07 |
| KIDINS220 | -0,72648968  | 6,959476647 | 4,27799E-08 | 1,62155E-07 |
| RAF1      | -0,418835267 | 6,857672677 | 4,28073E-08 | 1,62168E-07 |
| DOCK1     | -0,781009619 | 6,268158679 | 4,28593E-08 | 1,62275E-07 |
| GORAB     | 1,020550115  | 4,498525539 | 4,36895E-08 | 1,65327E-07 |
| MTMR10    | -0,976630573 | 5,442746773 | 4,38762E-08 | 1,65941E-07 |
| KRTCAP3   | 1,843960545  | 5,810496647 | 4,40461E-08 | 1,66491E-07 |
| TEAD1     | -0,809378374 | 6,494598477 | 4,48088E-08 | 1,6928E-07  |
| PRKCA     | -1,031143993 | 4,908551129 | 4,71349E-08 | 1,7797E-07  |
| RASSF5    | -0,942674097 | 6,02598433  | 4,74522E-08 | 1,79068E-07 |
| MRPL53    | 0,908326466  | 4,441158528 | 4,79288E-08 | 1,80767E-07 |
| PFDN4     | 1,176246658  | 5,031311638 | 4,81863E-08 | 1,81638E-07 |
| CLIC4     | -0,793103771 | 8,358521269 | 4,87203E-08 | 1,83548E-07 |
| COPS6     | 0,753393515  | 7,220728312 | 4,87468E-08 | 1,83548E-07 |
| DYNC2H1   | -1,132404844 | 4,155787893 | 4,89433E-08 | 1,84186E-07 |
| NCF4      | -1,19261726  | 4,21101709  | 4,91851E-08 | 1,84993E-07 |
| ACPL2     | 1,262547577  | 5,191643074 | 4,94717E-08 | 1,85969E-07 |
| ITPR2     | -1,132550968 | 5,485228228 | 4,9968E-08  | 1,87731E-07 |
| TMEM45A   | 1,35727282   | 7,782466868 | 5,06126E-08 | 1,90048E-07 |
| CCAR1     | 0,567646407  | 6,334249176 | 5,22134E-08 | 1,95951E-07 |
| PSMA5     | 0,812944636  | 7,198901214 | 5,25725E-08 | 1,9719E-07  |
| MC1R      | 1,557058195  | 2,76840459  | 5,26629E-08 | 1,97421E-07 |
| ACTR3     | 0,781624665  | 8,982814651 | 5,35225E-08 | 2,00533E-07 |
| C22orf28  | 0,710998864  | 7,480406355 | 5,37841E-08 | 2,01402E-07 |
| SULF1     | 1,891381243  | 8,118137995 | 5,65465E-08 | 2,1163E-07  |
| TBPL1     | 1,070926632  | 5,077077438 | 5,6665E-08  | 2,11957E-07 |
| USP47     | -0,672937977 | 6,474266057 | 5,75277E-08 | 2,15067E-07 |
| PSMC6     | 0,858485046  | 7,093671991 | 5,83982E-08 | 2,18201E-07 |
| ZNF273    | 0,941960464  | 4,150338518 | 5,84667E-08 | 2,18338E-07 |
| CNTROB    | -0,652578815 | 5,456261951 | 5,88671E-08 | 2,19713E-07 |
| PNKP      | 0,810533059  | 5,336980811 | 5,94245E-08 | 2,21672E-07 |
| UHRF1BP1L | -0,544448471 | 4,832901059 | 5,94951E-08 | 2,21814E-07 |
| ARIH2     | -0,397494509 | 6,228634493 | 5,96076E-08 | 2,22112E-07 |
| NFIB      | -1,187412411 | 6,371525557 | 5,96635E-08 | 2,22198E-07 |
| VBP1      | 0,830626803  | 6,459055594 | 6,09105E-08 | 2,26719E-07 |
| DNAJB12   | -0,523374918 | 6,007014845 | 6,22569E-08 | 2,31604E-07 |
| ACBD6     | 0,727521996  | 5,688019102 | 6,28493E-08 | 2,3368E-07  |
| GIMAP2    | -1,187032343 | 3,789909593 | 6,39969E-08 | 2,37817E-07 |
| NOC3L     | 0,713734797  | 5,068871808 | 6,47146E-08 | 2,40353E-07 |
| PTCD3     | 0,706044119  | 6,518571751 | 6,48339E-08 | 2,40665E-07 |
| MRPL38    | 0,918584575  | 5,726177572 | 6,60143E-08 | 2,44914E-07 |
| MRC2      | -1,202351811 | 7,355968049 | 6,81307E-08 | 2,52628E-07 |
| TRA2B     | 0,635583196  | 7,909800142 | 6,8514E-08  | 2,53911E-07 |
| NQO1      | 3,000727149  | 8,610476697 | 6,90908E-08 | 2,5591E-07  |
| KLC2      | 0,832295669  | 5,73040932  | 7,15423E-08 | 2,64846E-07 |
| SBDS      | -0,813719114 | 6,870696466 | 7,18693E-08 | 2,65912E-07 |
| SHOC2     | -0,519009919 | 6,037791783 | 7,25318E-08 | 2,68218E-07 |
| HIPK2     | -1,027895513 | 6,559776372 | 7,3528E-08  | 2,71703E-07 |



|          |              |             |             |             |
|----------|--------------|-------------|-------------|-------------|
| MCTS1    | 0,723278041  | 6,047719292 | 7,35538E-08 | 2,71703E-07 |
| FLNA     | -1,092297415 | 10,49811329 | 7,38551E-08 | 2,72668E-07 |
| PSMA7    | 0,840127314  | 8,28055015  | 7,41655E-08 | 2,73538E-07 |
| AKTIP    | -0,716157538 | 5,130622654 | 7,41709E-08 | 2,73538E-07 |
| EVC      | -1,045278686 | 4,918032165 | 7,45284E-08 | 2,74708E-07 |
| DDX60L   | -1,068425728 | 4,780299842 | 7,4748E-08  | 2,75368E-07 |
| DAZAP1   | 0,565615793  | 6,900343804 | 7,49474E-08 | 2,75954E-07 |
| MRPL48   | 0,998679331  | 5,372952858 | 7,55359E-08 | 2,77971E-07 |
| CNP      | 0,593180375  | 7,190728566 | 7,6988E-08  | 2,83161E-07 |
| HS6ST1   | 1,059334673  | 7,359382017 | 7,70428E-08 | 2,8321E-07  |
| MED19    | 0,757182891  | 4,433907528 | 7,95774E-08 | 2,9237E-07  |
| JARID2   | 1,001402246  | 5,947180039 | 8,0146E-08  | 2,943E-07   |
| RBMS1    | -0,656009782 | 7,028825489 | 8,02116E-08 | 2,94383E-07 |
| ABCF2    | 0,694646883  | 6,903057697 | 8,18567E-08 | 3,00258E-07 |
| IGFBP4   | -0,944803478 | 9,274127727 | 8,37239E-08 | 3,06943E-07 |
| XPR1     | 1,11128431   | 7,285614479 | 8,4396E-08  | 3,0924E-07  |
| MKKS     | 0,82814852   | 6,247077981 | 8,56112E-08 | 3,13524E-07 |
| GLRX5    | 0,724872102  | 5,974775386 | 8,79334E-08 | 3,21856E-07 |
| NCOR1    | -0,772639994 | 6,700114231 | 8,81536E-08 | 3,22489E-07 |
| LGMN     | -0,792824849 | 7,816434322 | 8,82959E-08 | 3,22836E-07 |
| PIK3R1   | -1,045093655 | 6,552794914 | 9,06274E-08 | 3,31183E-07 |
| ATP8B2   | -0,930031028 | 5,663790707 | 9,10579E-08 | 3,32578E-07 |
| UBA6     | 0,942133958  | 6,58988895  | 9,11726E-08 | 3,32819E-07 |
| SNAPC1   | 1,117305993  | 5,329635433 | 9,2457E-08  | 3,37327E-07 |
| BNIP3    | 1,48296415   | 6,955536572 | 9,31387E-08 | 3,39632E-07 |
| TBC1D12  | -0,583265382 | 3,730012818 | 9,48212E-08 | 3,45583E-07 |
| C14orf2  | 1,105495882  | 6,559578355 | 9,66757E-08 | 3,52154E-07 |
| PRKAR2A  | -0,709158487 | 4,492673986 | 9,7994E-08  | 3,56765E-07 |
| KIAA1033 | -0,538246541 | 5,957047775 | 9,80676E-08 | 3,56842E-07 |
| SERINC3  | -0,577242827 | 7,331124456 | 9,83645E-08 | 3,57732E-07 |
| C12orf45 | 0,829780603  | 3,708141966 | 9,88132E-08 | 3,59172E-07 |
| EFTUD2   | 0,657747324  | 7,649928501 | 9,93019E-08 | 3,60756E-07 |
| MMADHC   | 0,651709129  | 7,28722249  | 9,97612E-08 | 3,62232E-07 |
| ATP11B   | 1,396109443  | 7,850613081 | 9,98907E-08 | 3,62509E-07 |
| MRPL18   | 0,848331507  | 6,199954309 | 1,00431E-07 | 3,64275E-07 |
| MRPS18A  | 0,740209056  | 5,898523052 | 1,02429E-07 | 3,71324E-07 |
| PCCB     | 0,879450245  | 6,839982985 | 1,07294E-07 | 3,88755E-07 |
| HSPA14   | 0,808919982  | 5,548899395 | 1,08716E-07 | 3,93698E-07 |
| DYNLL1   | 0,670989075  | 8,138175571 | 1,08972E-07 | 3,94415E-07 |
| WTIP     | -1,169595491 | 3,247573284 | 1,09041E-07 | 3,94455E-07 |
| TFAM     | 0,79945233   | 5,537654414 | 1,10741E-07 | 4,0037E-07  |
| PCNXL2   | 0,900113118  | 4,409391742 | 1,10793E-07 | 4,0037E-07  |
| DUS3L    | 0,987398107  | 5,045919897 | 1,12156E-07 | 4,05082E-07 |
| WDR70    | 0,782039148  | 5,759722215 | 1,12944E-07 | 4,07671E-07 |
| ZNF3     | 0,708691368  | 5,728556516 | 1,12993E-07 | 4,07671E-07 |
| PITPNB   | 0,632075402  | 7,101587089 | 1,14119E-07 | 4,11517E-07 |
| IPO4     | 0,761536548  | 6,650094621 | 1,14673E-07 | 4,13296E-07 |
| BTN2A1   | -0,565922404 | 5,117662722 | 1,20578E-07 | 4,34349E-07 |
| ZNF207   | 0,476531251  | 7,924296265 | 1,22231E-07 | 4,4001E-07  |
| TMED2    | 0,790566074  | 9,274050101 | 1,22279E-07 | 4,4001E-07  |

|           |              |             |             |             |
|-----------|--------------|-------------|-------------|-------------|
| GABARAP   | -0,575312057 | 8,376195979 | 1,2265E-07  | 4,41115E-07 |
| HDAC5     | -0,704119944 | 6,143214096 | 1,23081E-07 | 4,42428E-07 |
| PAM       | -0,943354192 | 7,562076553 | 1,25043E-07 | 4,49244E-07 |
| PCYT1A    | 1,12018293   | 6,008701279 | 1,25494E-07 | 4,50629E-07 |
| STK17B    | -0,859419294 | 6,741549764 | 1,26749E-07 | 4,54897E-07 |
| KIF5B     | -0,567940576 | 7,913588058 | 1,27832E-07 | 4,58539E-07 |
| NDRG1     | 1,915062473  | 10,99120188 | 1,29115E-07 | 4,629E-07   |
| MALL      | -1,391400549 | 7,544493103 | 1,30796E-07 | 4,68679E-07 |
| NUDT15    | 0,798045611  | 5,476873202 | 1,33817E-07 | 4,79149E-07 |
| MAGOH     | 0,710477728  | 5,339076932 | 1,33858E-07 | 4,79149E-07 |
| XRCC6     | 0,643857389  | 9,394712003 | 1,34448E-07 | 4,81007E-07 |
| OSBPL5    | -0,859346222 | 4,772065307 | 1,35891E-07 | 4,85917E-07 |
| TRMT5     | 0,6622596    | 5,044724002 | 1,36196E-07 | 4,86752E-07 |
| GLS       | -0,832563608 | 6,915400545 | 1,36656E-07 | 4,88139E-07 |
| PSAP      | -0,734731312 | 11,40578597 | 1,37606E-07 | 4,91274E-07 |
| ABI2      | -0,6797295   | 6,072201382 | 1,39346E-07 | 4,97225E-07 |
| CDK8      | 0,88958168   | 4,25945903  | 1,40184E-07 | 4,99954E-07 |
| S100A11   | 1,16301306   | 10,25208033 | 1,40383E-07 | 5,00404E-07 |
| E2F6      | 0,80444141   | 5,32731867  | 1,40738E-07 | 5,01405E-07 |
| RBM4      | 0,539688159  | 7,328105561 | 1,42172E-07 | 5,06187E-07 |
| TIAL1     | 0,587536777  | 6,644448028 | 1,42228E-07 | 5,06187E-07 |
| SRXN1     | 2,747024682  | 8,893827194 | 1,45221E-07 | 5,16569E-07 |
| ARHGAP10  | -0,876557303 | 4,28145332  | 1,4742E-07  | 5,24116E-07 |
| CCT8      | 0,675020607  | 8,112936822 | 1,48896E-07 | 5,29088E-07 |
| C9orf116  | -1,223524655 | 1,983923101 | 1,5004E-07  | 5,32655E-07 |
| POLR1B    | 0,653737604  | 5,626829645 | 1,50056E-07 | 5,32655E-07 |
| FAM129B   | -0,840044955 | 8,724527427 | 1,50739E-07 | 5,34803E-07 |
| SLC7A1    | 1,086443826  | 7,007657048 | 1,50855E-07 | 5,34936E-07 |
| KIAA1522  | 0,997060963  | 8,007974535 | 1,52079E-07 | 5,38994E-07 |
| ETFA      | 0,788951406  | 7,079451329 | 1,5236E-07  | 5,39711E-07 |
| SPHK1     | 1,493691641  | 5,398399252 | 1,54398E-07 | 5,46646E-07 |
| PSMB2     | 0,61272826   | 7,392258371 | 1,56804E-07 | 5,54876E-07 |
| NDUFA12   | 0,689645967  | 5,866039029 | 1,59606E-07 | 5,64498E-07 |
| CHD9      | -0,6684037   | 5,709360012 | 1,60523E-07 | 5,67447E-07 |
| TCFL5     | 0,854969916  | 4,677785044 | 1,62766E-07 | 5,7508E-07  |
| AP2S1     | 0,792995098  | 6,962636407 | 1,63884E-07 | 5,78727E-07 |
| ELOVL6    | 1,531210013  | 4,80344964  | 1,64431E-07 | 5,80359E-07 |
| GTF2IRD2B | -0,750431828 | 4,465175393 | 1,65702E-07 | 5,84544E-07 |
| SLC46A1   | -0,842316858 | 4,720571438 | 1,6604E-07  | 5,85432E-07 |
| INPP5B    | -0,765485282 | 5,164038762 | 1,66255E-07 | 5,85887E-07 |
| G3BP1     | 0,606830457  | 7,599503474 | 1,66915E-07 | 5,8791E-07  |
| ATR       | 0,747997739  | 5,83305844  | 1,67528E-07 | 5,89763E-07 |
| YIF1B     | 0,944572071  | 6,029580875 | 1,6804E-07  | 5,91263E-07 |
| TRIM8     | -0,819739715 | 6,86139762  | 1,68646E-07 | 5,93089E-07 |
| SUDS3     | 0,658476321  | 6,562015625 | 1,7108E-07  | 6,01337E-07 |
| FLCN      | -0,566990675 | 5,533029199 | 1,7226E-07  | 6,05174E-07 |
| FARP1     | -0,868448167 | 6,837684099 | 1,758E-07   | 6,17292E-07 |
| EIF2A     | 0,783103069  | 7,596491121 | 1,76926E-07 | 6,20926E-07 |
| ZRANB1    | -0,525569898 | 5,775128648 | 1,81125E-07 | 6,35336E-07 |
| SMG6      | -0,721293102 | 5,859031093 | 1,81822E-07 | 6,37453E-07 |

|           |              |             |             |             |
|-----------|--------------|-------------|-------------|-------------|
| PICALM    | -0,494902433 | 7,933798516 | 1,83296E-07 | 6,42291E-07 |
| NHP2      | 0,83293602   | 6,504306852 | 1,841E-07   | 6,44774E-07 |
| ATXN7L3   | 0,584172151  | 6,806821982 | 1,84721E-07 | 6,46619E-07 |
| TET1      | 1,58200366   | 2,545823002 | 1,85512E-07 | 6,49053E-07 |
| TRIB3     | 1,724214939  | 6,239040955 | 1,87257E-07 | 6,54822E-07 |
| TSPYL2    | -0,858918777 | 5,061300767 | 1,89519E-07 | 6,62392E-07 |
| IRF3      | 0,675197358  | 6,232881749 | 1,92089E-07 | 6,71031E-07 |
| SURF2     | 0,805513296  | 4,434924332 | 1,97218E-07 | 6,88596E-07 |
| FXYD6     | -1,4046485   | 6,121501021 | 1,97618E-07 | 6,89639E-07 |
| NAT10     | 0,773246569  | 6,72650622  | 1,98319E-07 | 6,91734E-07 |
| VASN      | -1,217700972 | 4,652925453 | 1,98504E-07 | 6,92025E-07 |
| TMED5     | -0,764868625 | 6,677247958 | 2,00772E-07 | 6,99573E-07 |
| CALM1     | -0,711312393 | 9,130792049 | 2,02553E-07 | 7,0542E-07  |
| TTC19     | -0,635503006 | 5,723343781 | 2,02879E-07 | 7,06194E-07 |
| FAM57A    | 1,123081698  | 5,977259859 | 2,03888E-07 | 7,09343E-07 |
| SIK3      | -0,639683899 | 5,684242363 | 2,04908E-07 | 7,1253E-07  |
| DUSP16    | -0,819878909 | 6,349990092 | 2,11265E-07 | 7,3426E-07  |
| MYO18A    | -0,77398568  | 6,291421699 | 2,13988E-07 | 7,43343E-07 |
| EXOC8     | -0,503830462 | 4,840299217 | 2,156E-07   | 7,48561E-07 |
| VDAC3     | 1,17696247   | 7,64034816  | 2,164E-07   | 7,50748E-07 |
| MTA3      | 0,698090466  | 5,867401856 | 2,1645E-07  | 7,50748E-07 |
| SET       | 0,626657921  | 9,179436738 | 2,16717E-07 | 7,51156E-07 |
| OSBPL9    | -0,544443611 | 6,759627387 | 2,16788E-07 | 7,51156E-07 |
| COPS7B    | 0,586956082  | 5,624227897 | 2,18783E-07 | 7,57683E-07 |
| ZNF623    | 0,805725737  | 5,029994669 | 2,19156E-07 | 7,58591E-07 |
| UPK3BL    | 1,891584946  | 5,592386011 | 2,25812E-07 | 7,81235E-07 |
| NR2C2     | -0,524876639 | 5,610399158 | 2,26464E-07 | 7,83094E-07 |
| LTBP3     | -0,832878481 | 7,120780377 | 2,28576E-07 | 7,89995E-07 |
| OSGEPL1   | 0,799871838  | 3,659347812 | 2,32953E-07 | 8,04714E-07 |
| STAB1     | -1,079463195 | 6,074760846 | 2,38535E-07 | 8,23518E-07 |
| KBTBD2    | -0,526130417 | 6,350324125 | 2,38687E-07 | 8,23518E-07 |
| ERCC3     | 0,475226134  | 6,293608373 | 2,38759E-07 | 8,23518E-07 |
| HARBI1    | 0,82000195   | 2,775457101 | 2,38971E-07 | 8,23834E-07 |
| PTPN18    | -0,763314735 | 6,224986311 | 2,39378E-07 | 8,24821E-07 |
| DPM1      | 0,817415481  | 5,906230276 | 2,42031E-07 | 8,3354E-07  |
| SUOX      | -0,613302542 | 4,889093268 | 2,54983E-07 | 8,77704E-07 |
| TMEM9B    | -0,602254846 | 6,401647172 | 2,56264E-07 | 8,81668E-07 |
| PPID      | 0,689943455  | 5,560614926 | 2,56793E-07 | 8,83041E-07 |
| MLL3      | -0,727082433 | 6,484262975 | 2,57235E-07 | 8,84114E-07 |
| MAPK1IP1L | -0,532658779 | 7,041791203 | 2,59413E-07 | 8,91153E-07 |
| NBR1      | -0,556803129 | 7,48119529  | 2,59656E-07 | 8,91538E-07 |
| QSER1     | 0,838104828  | 6,304614327 | 2,61454E-07 | 8,97258E-07 |
| ZFP36L2   | -0,921992626 | 7,672247784 | 2,6236E-07  | 8,99695E-07 |
| VEZF1     | -0,531291492 | 6,532968656 | 2,62427E-07 | 8,99695E-07 |
| ARRDC4    | -1,020627813 | 5,339689667 | 2,63249E-07 | 9,02058E-07 |
| MARCKS    | 0,816018826  | 8,596730485 | 2,64242E-07 | 9,04927E-07 |
| SLC38A1   | 0,982603338  | 7,831754472 | 2,64352E-07 | 9,04927E-07 |
| GSTP1     | 1,061925891  | 10,31812837 | 2,66404E-07 | 9,11496E-07 |
| TSN       | 0,622211118  | 7,260169224 | 2,70832E-07 | 9,26181E-07 |
| TIPRL     | 0,79208229   | 6,527380988 | 2,71299E-07 | 9,27313E-07 |

|          |              |             |             |             |
|----------|--------------|-------------|-------------|-------------|
| SOAT1    | -0,728028049 | 6,091409336 | 2,74632E-07 | 9,38197E-07 |
| RARS     | 0,473931486  | 6,352825636 | 2,74759E-07 | 9,38197E-07 |
| DDX52    | 0,669010352  | 5,58800789  | 2,76849E-07 | 9,44863E-07 |
| IQGAP1   | -0,638311987 | 8,976733293 | 2,77539E-07 | 9,46742E-07 |
| HAS2     | -1,587358246 | 4,224941291 | 2,7847E-07  | 9,49444E-07 |
| PTPRF    | 1,003132878  | 9,710640984 | 2,84834E-07 | 9,70655E-07 |
| GOLT1B   | 1,049067399  | 6,882732177 | 2,88601E-07 | 9,83002E-07 |
| SAR1A    | -0,521186569 | 7,323989442 | 2,90508E-07 | 9,89002E-07 |
| ROMO1    | 1,294857916  | 6,132945341 | 2,9396E-07  | 1,00026E-06 |
| NRBP1    | 0,564789789  | 7,691888234 | 2,94598E-07 | 1,00193E-06 |
| AKT1S1   | 0,672917752  | 6,074500877 | 2,95915E-07 | 1,0059E-06  |
| CWC25    | -0,506342974 | 4,620675298 | 2,98089E-07 | 1,01279E-06 |
| DNM1L    | 0,680578543  | 6,971693201 | 3,03067E-07 | 1,02919E-06 |
| C1orf123 | -0,584950824 | 4,995628061 | 3,04001E-07 | 1,03185E-06 |
| CYTIP    | -1,25541878  | 4,777474374 | 3,08861E-07 | 1,04782E-06 |
| PIP4K2B  | -0,576952862 | 6,53909051  | 3,11649E-07 | 1,05675E-06 |
| SRP9     | 0,833494743  | 8,574076343 | 3,11995E-07 | 1,0574E-06  |
| PRKAB1   | -0,646725483 | 5,850614393 | 3,20313E-07 | 1,08506E-06 |
| ZCRB1    | 0,708362444  | 6,21885063  | 3,2219E-07  | 1,09087E-06 |
| SPTLC2   | -0,710536591 | 6,367538068 | 3,23497E-07 | 1,09475E-06 |
| ARAF     | -0,450114822 | 6,526974631 | 3,24446E-07 | 1,09742E-06 |
| PRKCI    | 0,918782552  | 7,321768146 | 3,26061E-07 | 1,10234E-06 |
| PPP3CA   | -0,625676163 | 6,330951192 | 3,27477E-07 | 1,10657E-06 |
| EEF1E1   | 0,809245403  | 4,424187329 | 3,31581E-07 | 1,11989E-06 |
| CLU      | -1,35421628  | 8,498000481 | 3,32049E-07 | 1,12091E-06 |
| KCTD5    | 0,623468324  | 6,049072358 | 3,33765E-07 | 1,12615E-06 |
| SEPT11   | -0,698425486 | 7,2975515   | 3,36262E-07 | 1,13401E-06 |
| DR1      | 0,673295318  | 6,747130022 | 3,3783E-07  | 1,13873E-06 |
| P4HA1    | 1,098548001  | 7,64761411  | 3,38275E-07 | 1,13967E-06 |
| SYDE1    | -0,898537607 | 4,154768752 | 3,38937E-07 | 1,14134E-06 |
| CAMK1    | -0,749470236 | 4,161178324 | 3,40903E-07 | 1,14739E-06 |
| SCAMP2   | -0,49362394  | 7,332481174 | 3,41258E-07 | 1,14802E-06 |
| NPM1     | 0,747750957  | 9,925651264 | 3,4244E-07  | 1,15143E-06 |
| WDR45L   | 0,846821671  | 7,726546769 | 3,44953E-07 | 1,15931E-06 |
| EIF4G1   | 0,976596115  | 10,0063284  | 3,48046E-07 | 1,16912E-06 |
| ATP1B3   | 1,432456515  | 9,169567363 | 3,4964E-07  | 1,1739E-06  |
| UCKL1    | 0,724479344  | 5,512176083 | 3,50857E-07 | 1,17741E-06 |
| SLC44A1  | 0,947498249  | 8,043148809 | 3,51229E-07 | 1,17808E-06 |
| RPL8     | 1,014722573  | 11,32838147 | 3,53365E-07 | 1,18466E-06 |
| RPL18A   | 1,190061106  | 10,42734388 | 3,55651E-07 | 1,1914E-06  |
| DYRK1A   | -0,550811537 | 6,460500693 | 3,55724E-07 | 1,1914E-06  |
| RUFY3    | -0,717397225 | 5,217059952 | 3,68676E-07 | 1,23417E-06 |
| SCMH1    | -0,613083361 | 5,264383296 | 3,72474E-07 | 1,24627E-06 |
| GPCPD1   | -0,866342387 | 6,42103946  | 3,73634E-07 | 1,24921E-06 |
| SRRD     | 0,667760176  | 4,599527038 | 3,73719E-07 | 1,24921E-06 |
| UBXN7    | 1,117226565  | 5,43740621  | 3,7722E-07  | 1,2603E-06  |
| RAB14    | -0,52506689  | 7,602554295 | 3,7936E-07  | 1,26682E-06 |
| SNX14    | -0,689056547 | 6,017349993 | 3,85238E-07 | 1,28582E-06 |
| ATL2     | 0,826440608  | 6,921017416 | 3,86773E-07 | 1,29032E-06 |
| RBM5     | -0,545018934 | 6,180942952 | 3,87957E-07 | 1,29363E-06 |

|          |              |             |             |             |
|----------|--------------|-------------|-------------|-------------|
| CHSY1    | -0,761341253 | 6,593295645 | 3,90458E-07 | 1,30134E-06 |
| PGM1     | -0,795325831 | 6,817361975 | 3,93904E-07 | 1,31218E-06 |
| PDCL3    | 0,64734027   | 5,435522258 | 3,95352E-07 | 1,31636E-06 |
| PSMC1    | 0,612937426  | 7,737865364 | 3,99091E-07 | 1,32816E-06 |
| KHSRP    | 0,715662027  | 7,736360604 | 4,0074E-07  | 1,333E-06   |
| RHOD     | 1,788020756  | 5,408937321 | 4,0513E-07  | 1,34694E-06 |
| TMEM159  | 1,111236441  | 6,501579801 | 4,06385E-07 | 1,35046E-06 |
| MIDN     | -0,733262888 | 7,019037106 | 4,06999E-07 | 1,35184E-06 |
| RPL37    | 0,984944293  | 10,20213646 | 4,08769E-07 | 1,35706E-06 |
| DHX37    | 0,7002853    | 5,272940051 | 4,0943E-07  | 1,35859E-06 |
| RPL7L1   | 0,555391287  | 7,096952523 | 4,13662E-07 | 1,37138E-06 |
| DGKD     | -1,002171744 | 5,443704086 | 4,13687E-07 | 1,37138E-06 |
| ZDHHC7   | -0,6626491   | 6,438755179 | 4,18062E-07 | 1,38521E-06 |
| MRPL44   | 0,639125391  | 5,454933879 | 4,21422E-07 | 1,39567E-06 |
| DSTN     | -0,651656371 | 8,99724961  | 4,28249E-07 | 1,41759E-06 |
| TMEM161A | 0,805905343  | 5,510403124 | 4,30404E-07 | 1,42403E-06 |
| TRIM56   | -0,807098224 | 4,321471841 | 4,31136E-07 | 1,42576E-06 |
| PLEKHG3  | 1,222847415  | 6,061906836 | 4,32062E-07 | 1,42813E-06 |
| PLIN2    | -1,187412974 | 6,605165348 | 4,46166E-07 | 1,47403E-06 |
| HCK      | -1,151579313 | 6,167078503 | 4,50722E-07 | 1,48837E-06 |
| RBBP7    | 0,760198784  | 7,511420248 | 4,53453E-07 | 1,49666E-06 |
| RPL26L1  | 0,738581484  | 5,135417087 | 4,63675E-07 | 1,52966E-06 |
| POT1     | 0,842118204  | 5,572027636 | 4,66131E-07 | 1,53701E-06 |
| PARP3    | -0,755437981 | 4,453232363 | 4,69152E-07 | 1,54623E-06 |
| MICALL1  | 1,134328336  | 6,968629441 | 4,7253E-07  | 1,55661E-06 |
| NUDT3    | 0,583890583  | 5,610975387 | 4,78186E-07 | 1,57448E-06 |
| LAP3     | -0,793492279 | 7,297586236 | 4,82717E-07 | 1,58863E-06 |
| NDUFA8   | 0,779387158  | 5,884229016 | 4,84594E-07 | 1,59404E-06 |
| SRGN     | -1,380528993 | 7,91839854  | 5,00836E-07 | 1,64667E-06 |
| ISY1     | 0,551702506  | 5,739173231 | 5,02712E-07 | 1,65204E-06 |
| FOXO3    | -0,712167843 | 6,836437483 | 5,10257E-07 | 1,67603E-06 |
| THBD     | -1,485693757 | 7,164808351 | 5,1717E-07  | 1,69792E-06 |
| GTF2A2   | 0,842103517  | 6,101047434 | 5,20235E-07 | 1,70716E-06 |
| CNPY2    | 0,631216944  | 6,515417562 | 5,2864E-07  | 1,73391E-06 |
| NCOA1    | -0,689905216 | 6,440051416 | 5,30327E-07 | 1,73861E-06 |
| RPLP1    | 0,933083984  | 11,12221722 | 5,33759E-07 | 1,74902E-06 |
| FLJ45445 | 1,46958002   | 5,562590395 | 5,41507E-07 | 1,77355E-06 |
| GAPVD1   | -0,559079543 | 6,25188977  | 5,47367E-07 | 1,79189E-06 |
| DCN      | -1,389038182 | 9,783197917 | 5,47959E-07 | 1,79296E-06 |
| CBR1     | 2,160244832  | 8,227459645 | 5,49592E-07 | 1,79744E-06 |
| TIMM9    | 0,780875492  | 5,107013496 | 5,55533E-07 | 1,816E-06   |
| LEF1     | 1,556307053  | 4,860040114 | 5,62925E-07 | 1,83928E-06 |
| POLR2J2  | 1,429574374  | 5,901285871 | 5,73941E-07 | 1,87438E-06 |
| ARHGAP33 | 1,599598922  | 3,296036781 | 6,00652E-07 | 1,96022E-06 |
| CISD2    | 0,765489978  | 5,922508436 | 6,008E-07   | 1,96022E-06 |
| THOC5    | 0,667451193  | 5,881191396 | 6,04464E-07 | 1,97123E-06 |
| ARMC10   | 0,674619453  | 6,562553765 | 6,14095E-07 | 2,00168E-06 |
| WIPF1    | -0,912768192 | 6,368658922 | 6,14502E-07 | 2,00205E-06 |
| SLMO2    | 0,925577     | 7,330690663 | 6,19191E-07 | 2,01636E-06 |
| C15orf48 | 2,519659541  | 5,796272157 | 6,20751E-07 | 2,02048E-06 |

|           |              |             |             |             |
|-----------|--------------|-------------|-------------|-------------|
| TMEM167B  | -0,507305726 | 6,161984967 | 6,28685E-07 | 2,04532E-06 |
| RFXANK    | 0,714660075  | 5,926433993 | 6,35798E-07 | 2,06748E-06 |
| BCCIP     | 0,647890016  | 6,19582039  | 6,457E-07   | 2,09868E-06 |
| CTTNBP2NL | -0,610332589 | 5,966776711 | 6,49382E-07 | 2,10964E-06 |
| CBWD2     | 0,55730042   | 4,907695151 | 6,49728E-07 | 2,10976E-06 |
| POLR3D    | 0,621757252  | 4,921771196 | 6,52637E-07 | 2,1182E-06  |
| SLC26A2   | -1,073476119 | 5,698449782 | 6,61712E-07 | 2,14663E-06 |
| ISOC2     | 0,866777538  | 5,943036406 | 6,65324E-07 | 2,15732E-06 |
| HAPLN3    | 1,325832811  | 5,091885632 | 6,67628E-07 | 2,16376E-06 |
| COL4A2    | -1,020187574 | 9,177052377 | 6,69876E-07 | 2,17002E-06 |
| FAM160B1  | -0,53685519  | 5,22167731  | 6,72499E-07 | 2,17748E-06 |
| TSEN34    | 0,642288179  | 6,17251758  | 6,81065E-07 | 2,20417E-06 |
| RASAL3    | -1,100941333 | 3,63572918  | 6,90162E-07 | 2,23255E-06 |
| ANKHD1    | -0,597168561 | 6,408707547 | 6,92235E-07 | 2,2382E-06  |
| SPIRE1    | -0,88213344  | 5,538613569 | 6,93195E-07 | 2,24024E-06 |
| FH        | 0,695822417  | 6,649236932 | 6,98357E-07 | 2,25585E-06 |
| ZC3HC1    | 0,567586337  | 4,68256114  | 7,0608E-07  | 2,27972E-06 |
| FAM46A    | -1,027145911 | 5,058642848 | 7,08758E-07 | 2,28728E-06 |
| LPIN3     | 0,998476175  | 4,86026564  | 7,11412E-07 | 2,29476E-06 |
| NAA38     | 0,643098817  | 4,903598903 | 7,21339E-07 | 2,32568E-06 |
| RPL18     | 0,880719353  | 9,891360295 | 7,2279E-07  | 2,32926E-06 |
| MAST4     | -0,952240886 | 5,090095359 | 7,26425E-07 | 2,33986E-06 |
| C15orf38  | -0,737923758 | 4,472040406 | 7,3532E-07  | 2,3674E-06  |
| EIF3M     | 0,735175122  | 7,654730548 | 7,40157E-07 | 2,38185E-06 |
| NOC2L     | 0,731172113  | 7,126467209 | 7,41829E-07 | 2,3861E-06  |
| TNIK      | -1,305384288 | 4,333024375 | 7,45786E-07 | 2,3977E-06  |
| PTCD2     | 0,590702832  | 3,142590114 | 7,47625E-07 | 2,40248E-06 |
| ITPA      | 0,751398545  | 5,836608107 | 7,51369E-07 | 2,41337E-06 |
| SLC25A5   | 1,062805814  | 9,583962745 | 7,51798E-07 | 2,41361E-06 |
| TUFM      | 0,588938985  | 8,166221282 | 7,56592E-07 | 2,42722E-06 |
| WRNIP1    | 0,659548313  | 6,461557624 | 7,56748E-07 | 2,42722E-06 |
| DOCK5     | -0,933549415 | 4,351432506 | 7,5912E-07  | 2,43368E-06 |
| FLNC      | -1,537566449 | 4,684242031 | 7,6759E-07  | 2,45968E-06 |
| LACTB     | -0,636698052 | 4,745369016 | 7,6978E-07  | 2,46554E-06 |
| HMG20B    | 0,616815732  | 6,238174993 | 7,76211E-07 | 2,48497E-06 |
| AGXT2L2   | -0,56305106  | 4,551336164 | 7,86486E-07 | 2,51668E-06 |
| BTBD2     | 0,795361233  | 7,158522876 | 7,88149E-07 | 2,52082E-06 |
| RAD21     | 0,60657963   | 8,713090263 | 7,9673E-07  | 2,54707E-06 |
| PHB       | 0,701289881  | 7,80128873  | 7,98765E-07 | 2,55238E-06 |
| PPIA      | 0,827931164  | 10,84122046 | 8,03364E-07 | 2,56587E-06 |
| NDUFS8    | 0,830725932  | 6,434865482 | 8,03848E-07 | 2,56622E-06 |
| CPNE1     | 1,060555951  | 7,817468445 | 8,05582E-07 | 2,57055E-06 |
| NEK9      | -0,619664501 | 6,597318613 | 8,15241E-07 | 2,60015E-06 |
| FBXO46    | 0,812812164  | 4,839278744 | 8,19855E-07 | 2,61365E-06 |
| NT5C3L    | 0,91199519   | 5,982775887 | 8,23627E-07 | 2,62445E-06 |
| KDM3A     | 0,869569153  | 7,01498354  | 8,44428E-07 | 2,68947E-06 |
| AZIN1     | 0,687708152  | 8,378602585 | 8,49622E-07 | 2,70475E-06 |
| ZFH3      | -0,824951775 | 5,754330142 | 8,5509E-07  | 2,72089E-06 |
| TCF4      | -0,919269194 | 7,005942352 | 8,56579E-07 | 2,72435E-06 |
| PTMA      | 0,681858388  | 10,87583447 | 8,73577E-07 | 2,77712E-06 |

|            |              |             |             |             |
|------------|--------------|-------------|-------------|-------------|
| ZNF92      | 0,814863141  | 3,845972317 | 8,76599E-07 | 2,78543E-06 |
| RP2        | -0,660907952 | 5,253743889 | 9,01308E-07 | 2,86261E-06 |
| PTTG1IP    | -0,583738976 | 8,499223531 | 9,09966E-07 | 2,88876E-06 |
| WDR82      | -0,406406431 | 7,364540066 | 9,13322E-07 | 2,89806E-06 |
| IRF1       | -0,972384259 | 7,005957776 | 9,18317E-07 | 2,91256E-06 |
| YWHAG      | 0,675066809  | 8,882177954 | 9,31049E-07 | 2,95157E-06 |
| SP2        | -0,473971533 | 5,241316558 | 9,33033E-07 | 2,95648E-06 |
| DCTN5      | 0,572811583  | 6,978337694 | 9,36244E-07 | 2,96528E-06 |
| SNORA8     | 0,95021139   | 4,651570344 | 9,68896E-07 | 3,06727E-06 |
| BBS5       | 1,243425297  | 5,588085131 | 9,71477E-07 | 3,07402E-06 |
| HNRNPAB    | 0,61447034   | 7,556927824 | 9,73506E-07 | 3,07901E-06 |
| EHHADH     | 0,935104227  | 5,33022265  | 9,94455E-07 | 3,1438E-06  |
| P4HB       | 0,746395338  | 10,7356964  | 9,98643E-07 | 3,15558E-06 |
| STON2      | 1,535574721  | 5,336564625 | 1,00535E-06 | 3,17529E-06 |
| ENY2       | 0,699612659  | 5,784885064 | 1,015E-06   | 3,20429E-06 |
| NCOR2      | -0,775541427 | 7,779217354 | 1,01609E-06 | 3,20625E-06 |
| ARHGEF9    | -0,851896847 | 4,439796988 | 1,03051E-06 | 3,25026E-06 |
| LUZP1      | -0,7126828   | 6,061928995 | 1,04634E-06 | 3,29866E-06 |
| C8orf33    | 0,710800397  | 6,686012985 | 1,05442E-06 | 3,32258E-06 |
| ACOT11     | 1,186627562  | 3,739452203 | 1,09142E-06 | 3,43759E-06 |
| ANAPC1     | 0,6471852    | 6,013224427 | 1,12366E-06 | 3,5375E-06  |
| ZNRD1      | 0,816476032  | 4,935848213 | 1,12578E-06 | 3,54253E-06 |
| HBS1L      | 0,673081384  | 6,399994907 | 1,13244E-06 | 3,56187E-06 |
| KIAA0430   | -0,612220831 | 6,484989369 | 1,13669E-06 | 3,57357E-06 |
| STAT6      | -0,629694892 | 7,970828101 | 1,13805E-06 | 3,57622E-06 |
| C1orf21    | -0,819515066 | 6,17741784  | 1,14288E-06 | 3,5894E-06  |
| SNF8       | 0,552643207  | 6,229338405 | 1,1433E-06  | 3,5894E-06  |
| GTPBP4     | 0,720838867  | 6,511275683 | 1,1466E-06  | 3,5981E-06  |
| RAD1       | 0,726328869  | 6,207181188 | 1,14836E-06 | 3,60196E-06 |
| DHX57      | 0,545121696  | 5,522179331 | 1,15325E-06 | 3,61565E-06 |
| B2M        | -0,959278979 | 12,08617281 | 1,16295E-06 | 3,64436E-06 |
| RPL36A     | 1,017906424  | 9,397709964 | 1,17139E-06 | 3,66912E-06 |
| SSH1       | -0,66844115  | 6,533453953 | 1,17304E-06 | 3,67261E-06 |
| IMMT       | 0,562940956  | 7,298709327 | 1,18727E-06 | 3,71545E-06 |
| ACOT7      | 0,960500518  | 6,082692889 | 1,21175E-06 | 3,79034E-06 |
| RANBP2     | -0,577263548 | 7,255405352 | 1,21569E-06 | 3,80091E-06 |
| COX7A2L    | 0,867727379  | 7,562293435 | 1,2252E-06  | 3,82889E-06 |
| BTBD10     | 0,687046275  | 5,963890339 | 1,23255E-06 | 3,85009E-06 |
| MESDC1     | -0,659286559 | 5,240575032 | 1,23629E-06 | 3,86002E-06 |
| TTC27      | 0,584938256  | 5,092938005 | 1,2736E-06  | 3,97468E-06 |
| B4GALT3    | 0,81292765   | 6,45159635  | 1,2749E-06  | 3,97691E-06 |
| TGS1       | 0,623218461  | 5,770807126 | 1,28944E-06 | 4,02044E-06 |
| ST6GALNAC4 | -0,797905404 | 5,034049135 | 1,29024E-06 | 4,0211E-06  |
| HAX1       | 0,832526002  | 7,176856851 | 1,29618E-06 | 4,03775E-06 |
| CAST       | -0,663931822 | 8,262566575 | 1,32037E-06 | 4,11124E-06 |
| NUDT9      | -0,568262828 | 5,131484346 | 1,32374E-06 | 4,11984E-06 |
| C5orf24    | -0,548505803 | 6,155683027 | 1,32572E-06 | 4,12411E-06 |
| SNAPIN     | 0,780955718  | 5,958805771 | 1,33485E-06 | 4,15065E-06 |
| WHSC2      | 0,785038118  | 5,475428146 | 1,35593E-06 | 4,21425E-06 |
| ATXN2L     | 0,652048474  | 7,644074864 | 1,35783E-06 | 4,21825E-06 |

|            |              |             |             |             |
|------------|--------------|-------------|-------------|-------------|
| GADD45GIP1 | 0,948573144  | 5,90233733  | 1,36058E-06 | 4,22487E-06 |
| CLSTN1     | 0,990135167  | 9,033064154 | 1,36213E-06 | 4,22774E-06 |
| NUMBL      | 1,032868906  | 5,346504043 | 1,36337E-06 | 4,22968E-06 |
| TBL2       | 0,65533355   | 6,389681755 | 1,3718E-06  | 4,2539E-06  |
| INSIG1     | -0,82698938  | 6,660215641 | 1,38261E-06 | 4,28546E-06 |
| VDAC1      | 0,597815222  | 8,193069451 | 1,39383E-06 | 4,31827E-06 |
| SSSCA1     | 0,736163415  | 4,782178257 | 1,41649E-06 | 4,38649E-06 |
| UBE2Z      | 0,45993775   | 7,825050574 | 1,41983E-06 | 4,39484E-06 |
| PSME3      | 0,559733551  | 7,74316438  | 1,4208E-06  | 4,39584E-06 |
| MORF4L2    | 0,706863651  | 8,480928171 | 1,42243E-06 | 4,39888E-06 |
| MRRF       | 0,774828234  | 5,159364638 | 1,42752E-06 | 4,41264E-06 |
| DRAP1      | 0,761897966  | 6,611759698 | 1,43549E-06 | 4,43526E-06 |
| KPTN       | 0,950511656  | 3,857847235 | 1,44967E-06 | 4,47704E-06 |
| ST20       | 1,030718118  | 2,372871667 | 1,45339E-06 | 4,48649E-06 |
| RPL35      | 1,19218285   | 9,657592405 | 1,45585E-06 | 4,49207E-06 |
| EDC3       | 0,500853551  | 5,848045154 | 1,46957E-06 | 4,53235E-06 |
| MITD1      | 0,652197735  | 4,252327953 | 1,47486E-06 | 4,54661E-06 |
| DERA       | 0,974128121  | 6,513652732 | 1,47602E-06 | 4,54812E-06 |
| PRKAB2     | 0,803494859  | 5,513861267 | 1,49705E-06 | 4,61084E-06 |
| ABCC1      | 1,74192786   | 8,628978832 | 1,4996E-06  | 4,61661E-06 |
| IFNAR2     | -0,688275222 | 5,302777107 | 1,5233E-06  | 4,68743E-06 |
| RPL36      | 0,976191587  | 8,992149217 | 1,52907E-06 | 4,70307E-06 |
| ULK2       | -0,737905659 | 5,091280187 | 1,53041E-06 | 4,70507E-06 |
| NDUFV1     | 0,551706231  | 7,15922742  | 1,53786E-06 | 4,72586E-06 |
| FNTA       | 0,767475308  | 7,153446985 | 1,54184E-06 | 4,73395E-06 |
| PPHLN1     | 0,544745077  | 6,228964296 | 1,54188E-06 | 4,73395E-06 |
| RNF168     | 1,320768909  | 5,166296585 | 1,54954E-06 | 4,75533E-06 |
| EIF4A2     | 0,988320625  | 9,685244616 | 1,55313E-06 | 4,76419E-06 |
| CAB39      | -0,553324309 | 7,004006404 | 1,55608E-06 | 4,7711E-06  |
| ATXN2      | -0,483668171 | 5,547979583 | 1,56055E-06 | 4,78266E-06 |
| ANKRD16    | 0,652179296  | 3,829553458 | 1,56509E-06 | 4,79426E-06 |
| KEAP1      | 0,936888498  | 7,29892595  | 1,56574E-06 | 4,79426E-06 |
| EXOSC1     | 0,640696825  | 5,012983926 | 1,57261E-06 | 4,8131E-06  |
| ME1        | 2,071591609  | 7,224848082 | 1,58775E-06 | 4,85727E-06 |
| NOC4L      | 0,683046202  | 4,894956044 | 1,62032E-06 | 4,95469E-06 |
| CDKN1C     | -1,109163014 | 3,850637707 | 1,64749E-06 | 5,03552E-06 |
| C19orf24   | 0,771157805  | 5,44611116  | 1,65036E-06 | 5,04204E-06 |
| HSPG2      | -1,135253756 | 8,754957969 | 1,67828E-06 | 5,12503E-06 |
| PIK3AP1    | -1,014200187 | 5,52539646  | 1,72763E-06 | 5,27336E-06 |
| HIST1H4H   | 2,047044237  | 3,242869385 | 1,73811E-06 | 5,30298E-06 |
| CCDC159    | -0,58775059  | 3,42576621  | 1,74272E-06 | 5,31467E-06 |
| TIMM13     | 0,82172641   | 5,98121375  | 1,74366E-06 | 5,31518E-06 |
| C8orf59    | 0,944777204  | 5,611478326 | 1,74914E-06 | 5,32948E-06 |
| KPNB1      | 0,560792159  | 8,489728477 | 1,77521E-06 | 5,40651E-06 |
| HMGN1      | 0,583519046  | 7,904922054 | 1,7848E-06  | 5,43329E-06 |
| PARD3      | 0,876100844  | 6,869689626 | 1,78869E-06 | 5,4427E-06  |
| CCDC134    | 0,767284409  | 2,615642515 | 1,81623E-06 | 5,52402E-06 |
| SCRIB      | 0,97567524   | 6,960546192 | 1,83646E-06 | 5,58306E-06 |
| MTF1       | -0,629207696 | 5,12451735  | 1,84387E-06 | 5,60311E-06 |
| HSF1       | 0,718713449  | 7,17036943  | 1,84702E-06 | 5,61016E-06 |



|            |              |             |             |             |
|------------|--------------|-------------|-------------|-------------|
| HSF4       | 1,455859096  | 2,993481857 | 1,86688E-06 | 5,66796E-06 |
| POLR2J3    | 1,401934495  | 6,457885676 | 1,8702E-06  | 5,67551E-06 |
| ULK1       | 0,795996703  | 6,450742939 | 1,88283E-06 | 5,7113E-06  |
| PSMD10     | 1,021737063  | 6,792642149 | 1,88839E-06 | 5,72563E-06 |
| SERBP1     | 0,505497872  | 8,932795625 | 1,89477E-06 | 5,74243E-06 |
| HSPBP1     | 0,806185381  | 5,91844584  | 1,9106E-06  | 5,78781E-06 |
| PLEKHA8    | 0,685989512  | 3,036815411 | 1,93338E-06 | 5,85423E-06 |
| VRK2       | 0,824526295  | 5,849010925 | 1,93469E-06 | 5,85559E-06 |
| HSP90AB1   | 0,643716074  | 11,04979611 | 1,94314E-06 | 5,87855E-06 |
| TRMT12     | 0,654633393  | 4,609949563 | 1,94851E-06 | 5,8922E-06  |
| TAF4B      | 1,425232071  | 4,496877776 | 1,95761E-06 | 5,91566E-06 |
| MYO1D      | -0,685431455 | 7,211931381 | 1,95801E-06 | 5,91566E-06 |
| CREB3L1    | -1,312440709 | 5,505340887 | 1,98048E-06 | 5,9809E-06  |
| HPS3       | 1,029571003  | 6,537589956 | 2,00861E-06 | 6,06318E-06 |
| ATP2A2     | 0,664500607  | 9,355993881 | 2,01127E-06 | 6,0685E-06  |
| STYXL1     | 0,875166658  | 5,638046483 | 2,02692E-06 | 6,11302E-06 |
| RSL1D1     | 0,559357963  | 7,999170772 | 2,04725E-06 | 6,17161E-06 |
| C18orf21   | 0,802649324  | 4,360020883 | 2,04975E-06 | 6,17644E-06 |
| ABLIM1     | -0,90930853  | 7,804923807 | 2,08185E-06 | 6,27039E-06 |
| TALDO1     | 1,241861588  | 8,727312629 | 2,09201E-06 | 6,29821E-06 |
| IBTK       | -0,56455252  | 6,051340085 | 2,11059E-06 | 6,35132E-06 |
| C19orf53   | 0,904056389  | 6,830851445 | 2,11656E-06 | 6,36649E-06 |
| HDHD2      | -0,616310946 | 5,000249618 | 2,1238E-06  | 6,38546E-06 |
| QPCTL      | 0,722463974  | 4,667210804 | 2,14824E-06 | 6,45609E-06 |
| BOD1       | 0,805025894  | 6,153167554 | 2,15223E-06 | 6,46523E-06 |
| CDKN2AIPNL | 0,922804108  | 5,124325142 | 2,19449E-06 | 6,58927E-06 |
| MRPL28     | 0,656841813  | 6,069534852 | 2,19878E-06 | 6,59924E-06 |
| CEP97      | 0,908371945  | 3,921285482 | 2,20272E-06 | 6,60816E-06 |
| VSIG10     | -1,017723608 | 5,094194521 | 2,20678E-06 | 6,61742E-06 |
| SLC25A24   | -0,703665907 | 5,93582479  | 2,22128E-06 | 6,65799E-06 |
| NAT9       | 0,702731632  | 5,108372396 | 2,23271E-06 | 6,6893E-06  |
| AP1M1      | -0,480703141 | 6,102037959 | 2,24492E-06 | 6,72292E-06 |
| AKAP9      | -0,79857838  | 6,210642733 | 2,26517E-06 | 6,7806E-06  |
| LYRM4      | 0,872107777  | 5,378493148 | 2,28319E-06 | 6,83154E-06 |
| TCEA1      | 0,723816994  | 7,971626767 | 2,30597E-06 | 6,89668E-06 |
| TRIM37     | 0,577195307  | 5,647602687 | 2,3435E-06  | 7,00585E-06 |
| C12orf29   | 0,838107861  | 5,081811622 | 2,34678E-06 | 7,0102E-06  |
| HPS4       | 0,709681824  | 6,023271013 | 2,34701E-06 | 7,0102E-06  |
| GPR56      | 1,132872216  | 8,077966212 | 2,3664E-06  | 7,06501E-06 |
| SMARCD2    | 0,617369619  | 7,535251601 | 2,40814E-06 | 7,18647E-06 |
| BHLHE40    | -0,852313675 | 8,615753416 | 2,44265E-06 | 7,28366E-06 |
| KRR1       | 0,544623805  | 6,020540724 | 2,44284E-06 | 7,28366E-06 |
| EIF3I      | 0,601616937  | 8,307962088 | 2,4449E-06  | 7,28661E-06 |
| OSTC       | 0,92393983   | 7,288534775 | 2,46349E-06 | 7,33882E-06 |
| YIF1A      | 0,796354307  | 6,587871416 | 2,53594E-06 | 7,55134E-06 |
| MAPKAPK5   | 0,466039206  | 5,45783853  | 2,54859E-06 | 7,58569E-06 |
| GPR183     | -1,156239338 | 4,66849519  | 2,55656E-06 | 7,60358E-06 |
| HIST1H1C   | 1,890986334  | 6,067770129 | 2,55683E-06 | 7,60358E-06 |
| AHNAK2     | 2,335355602  | 7,97460477  | 2,57381E-06 | 7,65075E-06 |
| TIGD2      | 0,83443293   | 3,486853774 | 2,59539E-06 | 7,71153E-06 |

|            |              |             |             |             |
|------------|--------------|-------------|-------------|-------------|
| CMTM7      | -0,869707068 | 5,047790622 | 2,60614E-06 | 7,7401E-06  |
| TNFRSF21   | 1,27231834   | 7,855063436 | 2,61356E-06 | 7,75877E-06 |
| CCL4       | -1,179202899 | 3,886171208 | 2,62333E-06 | 7,78439E-06 |
| NT5DC2     | 0,883889557  | 6,621438099 | 2,64788E-06 | 7,8538E-06  |
| TBC1D20    | -0,50149132  | 6,150230697 | 2,64977E-06 | 7,85599E-06 |
| FLII       | -0,604150795 | 7,609081676 | 2,66497E-06 | 7,89764E-06 |
| CDK3       | 0,826660206  | 4,648066679 | 2,68814E-06 | 7,96283E-06 |
| ZNF16      | 0,651947919  | 4,057000695 | 2,69831E-06 | 7,98947E-06 |
| SRPK2      | 0,623741917  | 6,337022656 | 2,70118E-06 | 7,99451E-06 |
| SLC3A2     | 0,999421598  | 8,617555807 | 2,72156E-06 | 8,0499E-06  |
| CKAP5      | 0,845900999  | 7,525277776 | 2,72226E-06 | 8,0499E-06  |
| HYI        | -0,840759975 | 4,066659357 | 2,76759E-06 | 8,1804E-06  |
| CALU       | 0,838694239  | 8,79779857  | 2,80612E-06 | 8,29069E-06 |
| PRPF40A    | 0,440043927  | 7,36978978  | 2,80786E-06 | 8,29224E-06 |
| BRMS1      | 0,622716609  | 6,164938783 | 2,82593E-06 | 8,34199E-06 |
| FANCM      | 0,661418805  | 3,33298777  | 2,8502E-06  | 8,41E-06    |
| GABPB1     | 0,552047439  | 5,429142953 | 2,86413E-06 | 8,44606E-06 |
| CSGALNACT2 | -0,688406896 | 5,522136226 | 2,8649E-06  | 8,44606E-06 |
| DHX35      | 0,916928184  | 4,922563675 | 2,88316E-06 | 8,49624E-06 |
| FOXK2      | 0,704312012  | 6,930181025 | 2,89273E-06 | 8,52076E-06 |
| IPPK       | 0,881124989  | 5,006439724 | 2,90337E-06 | 8,5484E-06  |
| PLA2G12A   | -0,497971443 | 5,303497868 | 2,91474E-06 | 8,57816E-06 |
| UBE2L3     | 0,621879591  | 7,701069021 | 2,91682E-06 | 8,58059E-06 |
| ABHD3      | 1,119291198  | 5,757111485 | 2,93145E-06 | 8,61989E-06 |
| TIMM17A    | 0,558015772  | 6,230453225 | 2,96288E-06 | 8,70856E-06 |
| APTX       | 0,884345125  | 5,743311623 | 3,00733E-06 | 8,83541E-06 |
| SEC61G     | 1,288094178  | 6,823701328 | 3,03493E-06 | 8,91265E-06 |
| KARS       | 0,55250715   | 7,819441873 | 3,04316E-06 | 8,93298E-06 |
| THOC1      | 0,658231591  | 4,744231099 | 3,0761E-06  | 9,02578E-06 |
| SLC25A1    | 0,888262112  | 7,046086945 | 3,10764E-06 | 9,11441E-06 |
| COPS3      | 0,68399798   | 6,648407768 | 3,12258E-06 | 9,15429E-06 |
| NUDT19     | 0,767776769  | 5,484179259 | 3,13391E-06 | 9,18355E-06 |
| PDCD2      | 0,694711921  | 5,96115874  | 3,14674E-06 | 9,2172E-06  |
| DMXL2      | -0,721200924 | 5,174518538 | 3,16032E-06 | 9,25299E-06 |
| TOMM20     | 0,69239803   | 8,820242234 | 3,17621E-06 | 9,29552E-06 |
| GPR180     | 0,73460597   | 4,69852495  | 3,19367E-06 | 9,34263E-06 |
| SLC7A5P2   | 0,637643581  | 1,613068386 | 3,19933E-06 | 9,35517E-06 |
| PMS1       | 0,577157944  | 4,26164851  | 3,20312E-06 | 9,3586E-06  |
| AMOTL1     | -0,973528737 | 6,843152575 | 3,20325E-06 | 9,3586E-06  |
| C1orf54    | -0,920266133 | 3,127232454 | 3,21473E-06 | 9,38811E-06 |
| RPA1       | 0,689455445  | 7,562334545 | 3,26167E-06 | 9,52113E-06 |
| SNHG6      | 1,02471813   | 6,336743942 | 3,2647E-06  | 9,52588E-06 |
| ATP6AP1    | -0,453606072 | 7,949044179 | 3,27782E-06 | 9,56008E-06 |
| USP31      | 0,946402018  | 5,979063075 | 3,28232E-06 | 9,56911E-06 |
| ALG8       | 0,685103787  | 5,642990877 | 3,29156E-06 | 9,59196E-06 |
| RPS5       | 1,170720659  | 10,32923154 | 3,30014E-06 | 9,61284E-06 |
| RALGAPA1   | -0,62859416  | 5,17841017  | 3,35503E-06 | 9,76855E-06 |
| PQLC1      | -0,620690745 | 5,804502377 | 3,36313E-06 | 9,78796E-06 |
| ERBB2IP    | -0,458337699 | 6,624398274 | 3,37641E-06 | 9,82243E-06 |
| TSR1       | 0,59074893   | 6,457750306 | 3,38808E-06 | 9,85217E-06 |

|          |              |             |             |             |
|----------|--------------|-------------|-------------|-------------|
| FJX1     | 1,339111026  | 4,024732726 | 3,39603E-06 | 9,87108E-06 |
| OST4     | 0,816802009  | 7,737416897 | 3,40432E-06 | 9,89094E-06 |
| TRIM23   | -0,578498168 | 3,853776825 | 3,46501E-06 | 1,0063E-05  |
| MARCH6   | 0,721045182  | 7,467743302 | 3,51217E-06 | 1,01956E-05 |
| GPX7     | 1,448817308  | 4,892647336 | 3,57169E-06 | 1,0364E-05  |
| POFUT1   | 0,628522853  | 7,152423513 | 3,6071E-06  | 1,04623E-05 |
| ZFR      | 0,473457448  | 7,393545832 | 3,6295E-06  | 1,05228E-05 |
| PRKAG1   | 0,553138549  | 6,641604779 | 3,63462E-06 | 1,05331E-05 |
| PVR      | -0,726648886 | 6,108039346 | 3,64568E-06 | 1,05607E-05 |
| SUB1     | 0,937387223  | 8,172180287 | 3,67846E-06 | 1,06511E-05 |
| ZNF544   | 0,770494589  | 5,408782315 | 3,70283E-06 | 1,07171E-05 |
| CDC34    | 0,694532996  | 5,83967126  | 3,70908E-06 | 1,07307E-05 |
| ATF5     | 1,585546787  | 6,975086617 | 3,72231E-06 | 1,07644E-05 |
| FHL2     | 1,556976556  | 6,27504974  | 3,82592E-06 | 1,10593E-05 |
| CBL      | -0,654160857 | 5,829623085 | 3,83261E-06 | 1,1074E-05  |
| SKA2     | 0,679767245  | 5,97247104  | 3,84739E-06 | 1,1112E-05  |
| IL4I1    | 1,28381831   | 4,60386718  | 3,87011E-06 | 1,11728E-05 |
| CLPP     | 0,623939848  | 5,850680751 | 3,9757E-06  | 1,14715E-05 |
| CAPN1    | 0,712878214  | 8,946003235 | 3,97692E-06 | 1,14715E-05 |
| TSTA3    | 0,939631201  | 6,882707576 | 3,98814E-06 | 1,1499E-05  |
| MRPS15   | 0,919244496  | 6,68881708  | 4,05932E-06 | 1,16993E-05 |
| ZDHHC17  | -0,436010269 | 4,8850674   | 4,06243E-06 | 1,17033E-05 |
| NAP1L4   | 0,535518273  | 7,509895947 | 4,10605E-06 | 1,1824E-05  |
| NCBP1    | 0,587902525  | 6,126173529 | 4,12915E-06 | 1,18855E-05 |
| AAMP     | 0,497244254  | 7,361621278 | 4,15636E-06 | 1,19587E-05 |
| ZNF212   | 0,647489472  | 4,622286078 | 4,16915E-06 | 1,19905E-05 |
| RUNX2    | 1,320689049  | 4,653353313 | 4,17474E-06 | 1,20015E-05 |
| C2orf68  | 0,636366816  | 6,187880764 | 4,19947E-06 | 1,20627E-05 |
| SEH1L    | 0,638373329  | 6,394354872 | 4,19958E-06 | 1,20627E-05 |
| IARS2    | 0,577998006  | 7,709205739 | 4,24598E-06 | 1,21909E-05 |
| DDOST    | 0,536438302  | 8,792581049 | 4,26776E-06 | 1,22475E-05 |
| EIF2B4   | 0,476793096  | 5,733029228 | 4,2693E-06  | 1,22475E-05 |
| PDHX     | 0,626249031  | 5,66692965  | 4,27193E-06 | 1,22499E-05 |
| GORASP2  | 0,462783124  | 7,646369296 | 4,28014E-06 | 1,22683E-05 |
| SETD7    | -0,68926239  | 6,823691023 | 4,28285E-06 | 1,22709E-05 |
| ABT1     | 0,744859385  | 5,939167885 | 4,2936E-06  | 1,22965E-05 |
| MEST     | 1,370928668  | 7,498747586 | 4,31667E-06 | 1,23574E-05 |
| CCDC117  | 0,66010322   | 6,00713926  | 4,33539E-06 | 1,24058E-05 |
| FAM127B  | 0,62656415   | 6,08723292  | 4,38713E-06 | 1,25486E-05 |
| SLC35B1  | 0,521835733  | 6,374189482 | 4,41069E-06 | 1,26107E-05 |
| ZNF408   | 0,695830802  | 4,281361865 | 4,41854E-06 | 1,26278E-05 |
| DTNB     | 0,818175398  | 5,258844583 | 4,45528E-06 | 1,27275E-05 |
| LIMK1    | 0,738604597  | 6,734545163 | 4,4843E-06  | 1,2805E-05  |
| EIF3D    | 0,612573105  | 8,553428904 | 4,52015E-06 | 1,2902E-05  |
| SLC2A3   | -1,355963111 | 7,321478771 | 4,55645E-06 | 1,30002E-05 |
| OSGIN2   | -0,732169935 | 5,519511693 | 4,61908E-06 | 1,31734E-05 |
| NDFIP1   | -0,571312777 | 7,307029328 | 4,62982E-06 | 1,31985E-05 |
| RBM8A    | 0,484153278  | 7,379679086 | 4,64818E-06 | 1,32453E-05 |
| C1orf122 | 0,807146487  | 5,292456742 | 4,66496E-06 | 1,32875E-05 |
| NPLOC4   | 0,542129769  | 7,825888264 | 4,71785E-06 | 1,34326E-05 |

|           |              |             |             |             |
|-----------|--------------|-------------|-------------|-------------|
| MRPL27    | 0,695067661  | 5,775591231 | 4,79417E-06 | 1,36442E-05 |
| MED6      | 0,609294467  | 5,080412167 | 4,84019E-06 | 1,37694E-05 |
| FHOD3     | 1,97333289   | 4,598112854 | 4,87069E-06 | 1,38466E-05 |
| PPP2R5A   | -0,718360281 | 6,968714348 | 4,87138E-06 | 1,38466E-05 |
| PRPSAP2   | 0,864173334  | 5,750689487 | 4,87629E-06 | 1,38548E-05 |
| HIST4H4   | 0,890616795  | 0,980528355 | 4,92377E-06 | 1,39838E-05 |
| PAPOLG    | 0,79387462   | 5,317371657 | 4,95048E-06 | 1,40539E-05 |
| ACAP2     | 0,924465819  | 7,494981408 | 4,96338E-06 | 1,40846E-05 |
| UTP3      | -0,573539979 | 5,291061953 | 4,99461E-06 | 1,41673E-05 |
| SIPA1     | -0,704959043 | 5,699802351 | 5,03922E-06 | 1,42879E-05 |
| GYS1      | 0,773602461  | 6,837476045 | 5,04768E-06 | 1,4306E-05  |
| NDUFB11   | 0,670406833  | 6,793101156 | 5,18439E-06 | 1,46873E-05 |
| CTDSPL2   | 0,683652749  | 6,07589011  | 5,2017E-06  | 1,47302E-05 |
| MRE11A    | 0,606029252  | 5,105209811 | 5,20662E-06 | 1,4738E-05  |
| DIP2B     | 0,888705332  | 7,177620808 | 5,21938E-06 | 1,4768E-05  |
| RBPJ      | -0,536136692 | 5,402133463 | 5,23524E-06 | 1,48068E-05 |
| TMEM56    | -0,947750698 | 3,939638245 | 5,23935E-06 | 1,48122E-05 |
| ACO1      | -0,773001263 | 6,145022559 | 5,28117E-06 | 1,49243E-05 |
| INF2      | -0,697548309 | 6,744939445 | 5,30882E-06 | 1,49962E-05 |
| MAT2A     | -0,562962506 | 8,029447301 | 5,35155E-06 | 1,51106E-05 |
| TMEFF1    | 1,053553066  | 3,500232976 | 5,50957E-06 | 1,55504E-05 |
| QRICH1    | -0,346085604 | 6,204572101 | 5,53307E-06 | 1,56097E-05 |
| MTR       | -0,587541218 | 5,93979586  | 5,53516E-06 | 1,56097E-05 |
| FASN      | -0,916419179 | 8,576905254 | 5,54932E-06 | 1,56432E-05 |
| LEPRE1    | 0,76923243   | 6,137491951 | 5,55335E-06 | 1,5648E-05  |
| DNM2      | -0,487063105 | 7,612970095 | 5,63516E-06 | 1,5872E-05  |
| ZNF197    | -0,455025182 | 4,052265489 | 5,66014E-06 | 1,59358E-05 |
| EIF2C2    | 0,931058658  | 4,965472494 | 5,69247E-06 | 1,60202E-05 |
| TFCP2     | 0,463255411  | 5,602526627 | 5,71211E-06 | 1,60688E-05 |
| CD276     | 0,695467883  | 7,595524421 | 5,71778E-06 | 1,60782E-05 |
| TMEM87A   | -0,494423085 | 7,263755981 | 5,7975E-06  | 1,62956E-05 |
| ISCA2     | 0,800155961  | 4,782747501 | 5,82925E-06 | 1,63781E-05 |
| GPS1      | 0,659755564  | 7,191058461 | 5,86778E-06 | 1,64796E-05 |
| NFE2L3    | 1,416406445  | 6,122475111 | 5,87969E-06 | 1,65062E-05 |
| NSMCE2    | 0,905196876  | 5,125277355 | 5,91006E-06 | 1,65847E-05 |
| LSM14B    | 0,679606626  | 6,257755387 | 5,91454E-06 | 1,65904E-05 |
| C14orf166 | 0,580388139  | 7,281959537 | 5,93144E-06 | 1,6631E-05  |
| RRP7B     | 0,666761133  | 4,689532787 | 5,97637E-06 | 1,675E-05   |
| NCK1      | 0,9187856    | 6,409399201 | 5,9837E-06  | 1,67637E-05 |
| TOM1      | -0,575058823 | 6,230263025 | 6,05121E-06 | 1,69459E-05 |
| DUSP12    | 0,640500776  | 4,488166146 | 6,10313E-06 | 1,70843E-05 |
| C15orf61  | 0,83524144   | 3,287493379 | 6,17409E-06 | 1,72758E-05 |
| WHSC1     | 0,979035148  | 6,958567385 | 6,19507E-06 | 1,73274E-05 |
| PIGC      | 0,681950239  | 5,8158119   | 6,26569E-06 | 1,75177E-05 |
| FBXW9     | 0,871765977  | 3,932232656 | 6,27034E-06 | 1,75236E-05 |
| LSM1      | 1,195354078  | 5,892616386 | 6,29732E-06 | 1,75917E-05 |
| RPL38     | 0,88506966   | 8,898275885 | 6,30768E-06 | 1,76129E-05 |
| TXNL1     | 0,726280668  | 6,734942659 | 6,31006E-06 | 1,76129E-05 |
| RSBN1     | -0,487750872 | 5,02402125  | 6,32837E-06 | 1,76568E-05 |
| FAM122A   | -0,570781466 | 4,805136867 | 6,40958E-06 | 1,78761E-05 |

|           |              |             |             |             |
|-----------|--------------|-------------|-------------|-------------|
| TERF2IP   | -0,487045661 | 6,298400226 | 6,47634E-06 | 1,80549E-05 |
| NACC1     | 0,698212383  | 6,916067444 | 6,49117E-06 | 1,80888E-05 |
| KLF5      | 1,385997151  | 8,412023456 | 6,50278E-06 | 1,81138E-05 |
| VASP      | -0,589139262 | 7,173722124 | 6,58904E-06 | 1,83465E-05 |
| CSNK1G2   | 0,65851748   | 6,450580805 | 6,62083E-06 | 1,84275E-05 |
| PAPD5     | -0,483866728 | 4,587592049 | 6,69963E-06 | 1,86392E-05 |
| REPS1     | 0,715391854  | 6,320399989 | 6,71756E-06 | 1,86783E-05 |
| GTF3C5    | 0,881172938  | 6,61857791  | 6,71914E-06 | 1,86783E-05 |
| MUL1      | -0,488865719 | 5,574961228 | 6,76126E-06 | 1,87877E-05 |
| PGD       | 1,548081485  | 9,36213884  | 6,77069E-06 | 1,88063E-05 |
| ZBTB41    | 0,725131667  | 5,636478668 | 6,8626E-06  | 1,90538E-05 |
| GMPR      | -1,213087784 | 3,385726285 | 6,99926E-06 | 1,94253E-05 |
| C9orf114  | 0,545815253  | 5,166951868 | 7,02729E-06 | 1,94952E-05 |
| SSB       | 0,56996575   | 7,235376834 | 7,08379E-06 | 1,96439E-05 |
| PDE8A     | -0,545612438 | 5,065551851 | 7,11016E-06 | 1,9709E-05  |
| RPN1      | 0,633268264  | 9,523331047 | 7,17977E-06 | 1,98939E-05 |
| PCGF5     | -0,637553745 | 6,356401455 | 7,18274E-06 | 1,9894E-05  |
| PPP6C     | -0,416111173 | 6,692084041 | 7,19987E-06 | 1,99334E-05 |
| TMEM39A   | 0,7289559    | 6,183293287 | 7,22919E-06 | 2,00064E-05 |
| CYTH4     | -0,966680112 | 4,817561272 | 7,24183E-06 | 2,00333E-05 |
| UGDH      | 1,366290771  | 7,582149092 | 7,28213E-06 | 2,01366E-05 |
| ELK3      | -0,772565404 | 5,290639135 | 7,34521E-06 | 2,03028E-05 |
| MRPS28    | 0,970519605  | 5,159116907 | 7,35029E-06 | 2,03086E-05 |
| NECAP2    | -0,575765877 | 6,813284059 | 7,37365E-06 | 2,03649E-05 |
| ZBED4     | 0,664976074  | 5,777560203 | 7,39671E-06 | 2,04203E-05 |
| UBFD1     | 0,556228736  | 6,468650658 | 7,43301E-06 | 2,05122E-05 |
| COPE      | 0,683209531  | 7,621592206 | 7,52064E-06 | 2,07457E-05 |
| SLK       | -0,666107373 | 6,750173085 | 7,54859E-06 | 2,08143E-05 |
| ELMO3     | 1,023682248  | 5,453149106 | 7,64172E-06 | 2,10626E-05 |
| KPNA1     | 0,629536373  | 7,300865637 | 7,67858E-06 | 2,11556E-05 |
| ZNF436    | 0,785889851  | 5,521653327 | 7,7312E-06  | 2,1292E-05  |
| JAG2      | 1,19893711   | 6,273767514 | 7,73591E-06 | 2,12964E-05 |
| PMS2L2    | 0,662371606  | 3,778926171 | 7,75709E-06 | 2,13461E-05 |
| CNOT6L    | -0,512121661 | 6,165782429 | 7,77624E-06 | 2,13902E-05 |
| SNAP23    | -0,493214962 | 6,607418261 | 7,78417E-06 | 2,14033E-05 |
| NUP93     | 0,825557916  | 6,636671554 | 7,86096E-06 | 2,16057E-05 |
| COX6C     | 0,735502859  | 7,141472865 | 7,89362E-06 | 2,16868E-05 |
| LOC550112 | 0,679834975  | 4,213352369 | 7,90598E-06 | 2,1712E-05  |
| TMEM147   | 0,716227057  | 6,85449589  | 8,04982E-06 | 2,20981E-05 |
| CDK7      | 0,639003257  | 4,97096393  | 8,05441E-06 | 2,21018E-05 |
| TMEM170A  | -0,46084968  | 5,089170052 | 8,05873E-06 | 2,21048E-05 |
| EPM2AIP1  | -0,551751729 | 5,381671331 | 8,07197E-06 | 2,21322E-05 |
| DCAF4     | 0,638712491  | 4,375431329 | 8,08577E-06 | 2,21611E-05 |
| CRCP      | 0,494869789  | 6,306645771 | 8,09481E-06 | 2,2177E-05  |
| LGALS3    | -0,88613562  | 8,437625868 | 8,12852E-06 | 2,22604E-05 |
| FAM117B   | 1,104505886  | 5,777052812 | 8,1493E-06  | 2,23083E-05 |
| GPD2      | 0,680869745  | 6,970856873 | 8,2238E-06  | 2,25032E-05 |
| FEZ2      | -0,478240605 | 5,854959551 | 8,27488E-06 | 2,26339E-05 |
| NOTCH2    | -0,769840521 | 7,564962078 | 8,31726E-06 | 2,27407E-05 |
| PRKX      | 1,290910952  | 6,650901149 | 8,33829E-06 | 2,27891E-05 |

|           |              |             |             |             |
|-----------|--------------|-------------|-------------|-------------|
| SNX33     | -0,653337988 | 5,734278254 | 8,34992E-06 | 2,28117E-05 |
| ZC3H3     | 0,646779962  | 5,409162308 | 8,35697E-06 | 2,28218E-05 |
| METTL9    | 0,652492125  | 7,311349965 | 8,39152E-06 | 2,2907E-05  |
| TAF6L     | 0,558365619  | 4,318368367 | 8,42325E-06 | 2,29845E-05 |
| E2F3      | 1,058198388  | 5,514752982 | 8,45967E-06 | 2,30746E-05 |
| ZSWIM6    | -0,57441232  | 4,901644264 | 8,47492E-06 | 2,3107E-05  |
| CNOT3     | 0,635009473  | 6,318980907 | 8,47872E-06 | 2,31081E-05 |
| SMCR8     | -0,634047856 | 5,677122682 | 8,55958E-06 | 2,33142E-05 |
| BAG4      | 1,280101851  | 5,045692534 | 8,56118E-06 | 2,33142E-05 |
| CORO7     | -0,542158542 | 5,612306924 | 8,59801E-06 | 2,34051E-05 |
| NDUFA11   | 0,894488597  | 6,725281789 | 8,70195E-06 | 2,36786E-05 |
| ITGA4     | -0,94484246  | 4,983921832 | 8,96657E-06 | 2,43889E-05 |
| SMAP2     | -0,797313024 | 6,436368455 | 8,98855E-06 | 2,4439E-05  |
| TMBIM6    | -0,434905527 | 10,35062081 | 9,05901E-06 | 2,46207E-05 |
| RFWD2     | 0,576999012  | 6,570155187 | 9,08684E-06 | 2,46865E-05 |
| PIP5K1C   | -0,589698568 | 6,022301195 | 9,10667E-06 | 2,47305E-05 |
| BTN3A1    | -0,801754276 | 5,995702676 | 9,17031E-06 | 2,48934E-05 |
| MMP14     | 1,122106999  | 9,243187341 | 9,24471E-06 | 2,50854E-05 |
| FAM49B    | 0,694181418  | 7,213636679 | 9,3503E-06  | 2,53619E-05 |
| DCLRE1A   | 0,666149627  | 4,750741768 | 9,39122E-06 | 2,54627E-05 |
| APRT      | 0,754457815  | 7,024822674 | 9,73217E-06 | 2,63766E-05 |
| PARP14    | -0,728817242 | 7,36984943  | 9,76323E-06 | 2,64503E-05 |
| CCDC50    | -0,695327499 | 6,796425294 | 9,78205E-06 | 2,64908E-05 |
| RBPM52    | -1,097770689 | 1,816614891 | 9,80053E-06 | 2,65303E-05 |
| NUP50     | 0,596460952  | 6,894776486 | 9,80538E-06 | 2,65329E-05 |
| C11orf31  | 0,832430447  | 6,755967055 | 9,95426E-06 | 2,69251E-05 |
| IL4R      | -0,930363217 | 6,68768861  | 1,00943E-05 | 2,72929E-05 |
| PTK2B     | -0,838879838 | 6,267478564 | 1,01144E-05 | 2,73365E-05 |
| TRAPPC10  | -0,523888573 | 6,017556618 | 1,02907E-05 | 2,78021E-05 |
| GSR       | 1,448885745  | 7,510946403 | 1,03528E-05 | 2,79588E-05 |
| PSMB1     | 0,779584357  | 8,075989578 | 1,03851E-05 | 2,80348E-05 |
| PLA2G16   | -1,363356741 | 5,101110144 | 1,04014E-05 | 2,80677E-05 |
| REXO4     | 0,563179849  | 5,225936904 | 1,058E-05   | 2,85385E-05 |
| EEF1G     | 0,630373508  | 11,27922409 | 1,06169E-05 | 2,86265E-05 |
| MAPK13    | 0,750311058  | 6,977280028 | 1,07924E-05 | 2,90883E-05 |
| FRMD8     | 0,707724548  | 6,509488937 | 1,0805E-05  | 2,91108E-05 |
| NT5C      | 0,906433006  | 5,14375721  | 1,08237E-05 | 2,91496E-05 |
| TET3      | 0,941490293  | 6,302618713 | 1,08293E-05 | 2,91531E-05 |
| LOC727896 | 0,616471248  | 1,290550725 | 1,11053E-05 | 2,98844E-05 |
| SMNDC1    | 0,540386375  | 5,86704418  | 1,12179E-05 | 3,01754E-05 |
| NUP88     | 0,617415483  | 5,949160684 | 1,12952E-05 | 3,03714E-05 |
| ABHD13    | -0,554802869 | 4,996483889 | 1,13705E-05 | 3,05618E-05 |
| HTRA2     | 0,498220906  | 5,467783519 | 1,14095E-05 | 3,06547E-05 |
| TOMM6     | 0,653880746  | 6,851677853 | 1,14475E-05 | 3,07446E-05 |
| RABIF     | 0,54998152   | 4,865957436 | 1,14611E-05 | 3,0769E-05  |
| ITGB3     | -1,179157579 | 3,202216089 | 1,15483E-05 | 3,09909E-05 |
| PSMA1     | 0,768778656  | 7,739816854 | 1,1635E-05  | 3,12113E-05 |
| SDHC      | 0,760999818  | 7,741790539 | 1,16788E-05 | 3,13165E-05 |
| DNMT1     | 0,833213639  | 7,129461156 | 1,17611E-05 | 3,15247E-05 |
| STK39     | 0,781570704  | 5,820220899 | 1,17712E-05 | 3,15395E-05 |

|           |              |             |             |             |
|-----------|--------------|-------------|-------------|-------------|
| HDAC3     | 0,423860264  | 6,402658435 | 1,19733E-05 | 3,20683E-05 |
| C12orf10  | 0,549559548  | 5,702438891 | 1,19956E-05 | 3,21155E-05 |
| C20orf111 | 0,823887611  | 6,280081819 | 1,20489E-05 | 3,22454E-05 |
| C7orf43   | 0,591834359  | 4,589986073 | 1,22386E-05 | 3,27404E-05 |
| RABGAP1L  | -0,515390219 | 4,912631511 | 1,23852E-05 | 3,31195E-05 |
| CHCHD10   | 1,049608674  | 5,169643586 | 1,25013E-05 | 3,34168E-05 |
| FAM98A    | 0,474300252  | 5,962062013 | 1,26443E-05 | 3,37857E-05 |
| FAM115A   | -0,737167674 | 5,490818314 | 1,28084E-05 | 3,42108E-05 |
| MICAL3    | 0,87349992   | 6,213871335 | 1,29294E-05 | 3,45205E-05 |
| EIF2S3    | 0,69199263   | 8,552168568 | 1,31518E-05 | 3,51006E-05 |
| PHKG2     | 0,581735277  | 5,301603594 | 1,31656E-05 | 3,51238E-05 |
| DDX18     | 0,472607283  | 7,335942853 | 1,33604E-05 | 3,56294E-05 |
| CLN3      | -0,507565973 | 5,830143462 | 1,33847E-05 | 3,56802E-05 |
| HAUS1     | 1,052033927  | 5,150681089 | 1,3398E-05  | 3,57019E-05 |
| COPS8     | 0,522640385  | 6,255879144 | 1,34945E-05 | 3,59448E-05 |
| RNF217    | 1,537198275  | 4,413339262 | 1,35451E-05 | 3,60655E-05 |
| ZBTB33    | 0,650209638  | 6,058762142 | 1,36253E-05 | 3,6265E-05  |
| TANC2     | -0,815103017 | 6,232032823 | 1,36377E-05 | 3,62838E-05 |
| MTRR      | -0,600814254 | 5,887045569 | 1,36622E-05 | 3,63349E-05 |
| LRWD1     | 0,675736582  | 4,848767176 | 1,37343E-05 | 3,65123E-05 |
| VPS37B    | -0,690690458 | 6,271289332 | 1,38386E-05 | 3,67753E-05 |
| SIKE1     | 0,544601655  | 5,787955729 | 1,38977E-05 | 3,6918E-05  |
| SV2A      | 1,490340505  | 4,488854102 | 1,39996E-05 | 3,71741E-05 |
| RSAD2     | -1,305625297 | 5,197554025 | 1,40296E-05 | 3,72393E-05 |
| USE1      | 0,63022391   | 4,899323087 | 1,40466E-05 | 3,727E-05   |
| TXNDC12   | 0,501158723  | 7,13448228  | 1,43274E-05 | 3,80002E-05 |
| PMM1      | -0,591886592 | 5,515641962 | 1,43884E-05 | 3,81472E-05 |
| MDFIC     | -0,72328896  | 5,946430801 | 1,45364E-05 | 3,85246E-05 |
| CASC4     | -0,511055673 | 7,127579365 | 1,48115E-05 | 3,92385E-05 |
| C11orf10  | 0,597530262  | 6,734690812 | 1,48221E-05 | 3,92511E-05 |
| PPP1CA    | 0,577593073  | 8,248432336 | 1,48707E-05 | 3,93646E-05 |
| NFKBID    | -0,82618817  | 1,889789841 | 1,49221E-05 | 3,94855E-05 |
| SMARCA5   | -0,545501471 | 7,211947391 | 1,49938E-05 | 3,96597E-05 |
| IL17RA    | -0,602821824 | 4,86874519  | 1,5014E-05  | 3,96977E-05 |
| OCEL1     | -0,71649966  | 3,714757554 | 1,50768E-05 | 3,98483E-05 |
| WDR60     | -0,576194006 | 4,309192271 | 1,52094E-05 | 4,01833E-05 |
| TUBA4A    | 1,151556155  | 7,242236566 | 1,53203E-05 | 4,04605E-05 |
| VPS33A    | 0,471467705  | 5,779459468 | 1,5369E-05  | 4,05736E-05 |
| RPS21     | 1,092149807  | 9,135096473 | 1,54039E-05 | 4,06411E-05 |
| HNRPDL    | -0,386532714 | 7,721900091 | 1,54066E-05 | 4,06411E-05 |
| KLHL7     | 0,630668356  | 5,750497129 | 1,54627E-05 | 4,07735E-05 |
| SMEK2     | 0,511977153  | 7,364262955 | 1,55629E-05 | 4,10219E-05 |
| DPH5      | 0,702976922  | 4,903018895 | 1,55996E-05 | 4,11026E-05 |
| RDBP      | 0,617363945  | 6,857498629 | 1,56217E-05 | 4,1145E-05  |
| ZNF33B    | -0,588905844 | 4,971190112 | 1,57087E-05 | 4,13582E-05 |
| SPATA2L   | -0,694201047 | 3,805213852 | 1,59442E-05 | 4,1962E-05  |
| TBCC      | 0,614599562  | 5,102354153 | 1,60508E-05 | 4,2211E-05  |
| RRS1      | 0,748736561  | 5,104987757 | 1,60512E-05 | 4,2211E-05  |
| NDUFS3    | 0,629751166  | 6,620704112 | 1,61364E-05 | 4,24188E-05 |
| SF3B3     | 0,535984157  | 8,22437739  | 1,61645E-05 | 4,24762E-05 |

|           |              |             |             |             |
|-----------|--------------|-------------|-------------|-------------|
| NDUFA6    | 0,690789021  | 6,476897916 | 1,61948E-05 | 4,25393E-05 |
| FAM76B    | 0,60400785   | 4,426014565 | 1,62045E-05 | 4,25485E-05 |
| USP10     | 0,528673163  | 6,908333991 | 1,63106E-05 | 4,28105E-05 |
| SIVA1     | 0,962264241  | 6,67840767  | 1,63527E-05 | 4,29047E-05 |
| HIST1H2BK | 1,267658457  | 6,834404244 | 1,64779E-05 | 4,32165E-05 |
| SPRYD3    | -0,46056513  | 6,35403948  | 1,67772E-05 | 4,39845E-05 |
| SNHG12    | 1,10940255   | 3,985661583 | 1,69787E-05 | 4,44897E-05 |
| ARL4C     | 0,952580595  | 7,357191058 | 1,69829E-05 | 4,44897E-05 |
| NAP1L5    | -1,076982692 | 2,662414318 | 1,71228E-05 | 4,48388E-05 |
| TRIM44    | -0,625198542 | 6,288037431 | 1,7579E-05  | 4,60159E-05 |
| FAM104A   | 0,508228805  | 5,639936627 | 1,79779E-05 | 4,70419E-05 |
| UBD       | 2,271677734  | 6,008750767 | 1,81319E-05 | 4,74268E-05 |
| MPHOSPH6  | 0,778266574  | 5,164609203 | 1,84143E-05 | 4,81469E-05 |
| DNM1      | 1,19102024   | 4,745990685 | 1,85048E-05 | 4,8365E-05  |
| LTBR      | 0,791540649  | 7,899387123 | 1,85926E-05 | 4,85758E-05 |
| KDM3B     | -0,507002219 | 6,783102757 | 1,86556E-05 | 4,87219E-05 |
| AEBP2     | 0,697972852  | 6,105932808 | 1,87162E-05 | 4,88613E-05 |
| CISD1     | 0,792242639  | 5,156992099 | 1,8733E-05  | 4,88864E-05 |
| EIF2B1    | 0,407374033  | 6,234344257 | 1,87533E-05 | 4,89208E-05 |
| NAA15     | 0,521356511  | 6,417526561 | 1,88121E-05 | 4,90371E-05 |
| MRPL40    | 0,751096413  | 5,75604069  | 1,88123E-05 | 4,90371E-05 |
| RPS18     | 1,222750469  | 11,71501329 | 1,8878E-05  | 4,91897E-05 |
| FN3KRP    | 0,614897433  | 6,072139627 | 1,89108E-05 | 4,92561E-05 |
| EPRS      | 0,577869786  | 7,911228383 | 1,8922E-05  | 4,92665E-05 |
| KLHDC7B   | 2,865713641  | 4,658808676 | 1,90564E-05 | 4,95976E-05 |
| MRPS14    | 0,621468334  | 4,890560524 | 1,91398E-05 | 4,97957E-05 |
| SMARCD1   | 0,481800832  | 6,792985913 | 1,92255E-05 | 4,99994E-05 |
| ACTA2     | -1,038602775 | 8,262864657 | 1,92506E-05 | 5,00456E-05 |
| GFM2      | 0,588433707  | 5,498198409 | 1,93771E-05 | 5,03554E-05 |
| CRYZL1    | -0,448711069 | 4,408563483 | 1,95023E-05 | 5,06613E-05 |
| FTSJ2     | 0,485541431  | 5,657968555 | 1,95545E-05 | 5,07776E-05 |
| ULK3      | 0,686042069  | 5,601597712 | 1,96097E-05 | 5,09016E-05 |
| RBMX      | 0,429675507  | 8,074839484 | 1,9661E-05  | 5,10154E-05 |
| POP5      | 0,676664712  | 4,91911193  | 1,98651E-05 | 5,15254E-05 |
| ATP5G2    | 0,586663328  | 8,478317164 | 2,0031E-05  | 5,19359E-05 |
| EARS2     | 0,531989902  | 5,361836293 | 2,00695E-05 | 5,2016E-05  |
| NSFL1C    | 0,48354825   | 7,054453643 | 2,01814E-05 | 5,22861E-05 |
| UBQLN4    | 0,525183593  | 6,862553571 | 2,02352E-05 | 5,24008E-05 |
| PTPN13    | -0,962806914 | 6,710278981 | 2,02482E-05 | 5,24008E-05 |
| DCPS      | 0,560500045  | 4,773677184 | 2,02487E-05 | 5,24008E-05 |
| MSH5      | 0,815889345  | 4,352076666 | 2,02942E-05 | 5,24985E-05 |
| GALNT7    | 0,903925572  | 6,226375877 | 2,03146E-05 | 5,25315E-05 |
| MYO9B     | -0,59644954  | 6,890572752 | 2,04115E-05 | 5,2762E-05  |
| CTSL1     | -0,88173103  | 7,663086453 | 2,06842E-05 | 5,34467E-05 |
| ABHD2     | -0,9255138   | 8,36311412  | 2,09271E-05 | 5,40538E-05 |
| PSMC3     | 0,558078875  | 7,552161798 | 2,09817E-05 | 5,41742E-05 |
| ILF3      | 0,547580699  | 8,496940576 | 2,12825E-05 | 5,493E-05   |
| RPL39     | 0,988517372  | 10,30171109 | 2,12907E-05 | 5,49306E-05 |
| KPNA5     | -0,678542304 | 2,309298276 | 2,13484E-05 | 5,50586E-05 |
| STK24     | 0,588323132  | 7,975753493 | 2,13914E-05 | 5,51486E-05 |



|         |              |             |             |             |
|---------|--------------|-------------|-------------|-------------|
| GMIP    | -0,623061783 | 5,024675736 | 2,1505E-05  | 5,54204E-05 |
| ZDHHC18 | 0,583403547  | 6,223469358 | 2,16914E-05 | 5,58796E-05 |
| DNAJC1  | -0,610042995 | 5,371909637 | 2,17564E-05 | 5,60259E-05 |
| BBS9    | -0,523476156 | 4,135423523 | 2,19479E-05 | 5,64977E-05 |
| MTPAP   | 0,4582645    | 5,270436095 | 2,19925E-05 | 5,65914E-05 |
| COX7B   | 0,961639587  | 7,231743342 | 2,20531E-05 | 5,67258E-05 |
| YWHAH   | -0,444317286 | 7,824455607 | 2,21563E-05 | 5,69697E-05 |
| GNB5    | 0,616530012  | 5,391179401 | 2,22769E-05 | 5,72583E-05 |
| PRPF39  | 0,597294188  | 4,85169026  | 2,23924E-05 | 5,75333E-05 |
| TRIAP1  | 0,604034405  | 5,472168781 | 2,2489E-05  | 5,77598E-05 |
| FBXO33  | -0,591506486 | 4,539987994 | 2,25738E-05 | 5,79559E-05 |
| UBAC2   | 0,512940286  | 6,770383605 | 2,2636E-05  | 5,80937E-05 |
| DUSP14  | 0,985521483  | 5,708672391 | 2,26739E-05 | 5,81691E-05 |
| KIF21A  | 1,128889906  | 5,873894316 | 2,30215E-05 | 5,90387E-05 |
| GPR108  | -0,448773464 | 6,276300714 | 2,32379E-05 | 5,95711E-05 |
| BCL7B   | -0,453193677 | 6,240331028 | 2,32922E-05 | 5,9688E-05  |
| PSMB7   | 0,521157129  | 7,32278067  | 2,34791E-05 | 6,01442E-05 |
| STX6    | 0,552512043  | 6,852920205 | 2,42074E-05 | 6,19714E-05 |
| MYH9    | -0,787765152 | 10,9062691  | 2,42106E-05 | 6,19714E-05 |
| DDIT4   | 1,393988597  | 8,788118688 | 2,43513E-05 | 6,23083E-05 |
| VPS36   | -0,497052253 | 5,984778504 | 2,4503E-05  | 6,26728E-05 |
| CIAPIN1 | 0,613601948  | 6,413003152 | 2,45807E-05 | 6,2848E-05  |
| ATP5H   | 0,691192232  | 7,50993163  | 2,46232E-05 | 6,29332E-05 |
| SNRNP48 | 0,608053764  | 4,542929182 | 2,47981E-05 | 6,33563E-05 |
| NUMA1   | -0,652627771 | 8,255893147 | 2,48287E-05 | 6,34109E-05 |
| GABPA   | -0,495214933 | 5,529906741 | 2,48985E-05 | 6,35653E-05 |
| SGPP1   | -0,829396716 | 4,750938251 | 2,51107E-05 | 6,4083E-05  |
| CRBN    | -0,690987883 | 5,192480143 | 2,51868E-05 | 6,42532E-05 |
| MREG    | 0,820964015  | 5,836198566 | 2,52794E-05 | 6,44653E-05 |
| NFXL1   | 0,635104647  | 4,203506261 | 2,53238E-05 | 6,45545E-05 |
| PPP1R2  | 0,65502436   | 7,166244938 | 2,55716E-05 | 6,51616E-05 |
| NCKAP5L | -0,616504824 | 5,067470258 | 2,57906E-05 | 6,56951E-05 |
| ADAP2   | -0,788922232 | 4,222422482 | 2,58892E-05 | 6,59218E-05 |
| PTPN23  | -0,482081544 | 6,187510263 | 2,59805E-05 | 6,61296E-05 |
| VAR5    | 0,640675562  | 7,195391525 | 2,60928E-05 | 6,63907E-05 |
| UNC93B1 | -0,695229712 | 6,016078858 | 2,62103E-05 | 6,66647E-05 |
| GLRX2   | 0,712352785  | 3,215772901 | 2,64505E-05 | 6,72505E-05 |
| MANBAL  | 0,589583516  | 6,640390328 | 2,65639E-05 | 6,75138E-05 |
| SLC38A7 | 0,701120788  | 4,532665009 | 2,67866E-05 | 6,80544E-05 |
| CMTM8   | -0,782526735 | 3,656353646 | 2,69266E-05 | 6,83846E-05 |
| CSNK2B  | 0,515669752  | 7,576188934 | 2,71294E-05 | 6,8874E-05  |
| CHPF    | 0,961421039  | 7,521495011 | 2,758E-05   | 6,99918E-05 |
| TECR    | 0,768513816  | 7,772328114 | 2,77607E-05 | 7,04241E-05 |
| COL4A1  | -0,833799308 | 9,1066381   | 2,78232E-05 | 7,05564E-05 |
| EI24    | 0,525127409  | 7,750564281 | 2,81667E-05 | 7,14009E-05 |
| TUSC3   | 1,11507012   | 6,527820309 | 2,82395E-05 | 7,1559E-05  |
| PPP3R1  | 0,484366131  | 7,353463674 | 2,83305E-05 | 7,17628E-05 |
| RPS15   | 0,747886354  | 8,999599366 | 2,88567E-05 | 7,30687E-05 |
| ZDHHC3  | -0,542357266 | 7,141634602 | 2,90794E-05 | 7,36052E-05 |
| MORC4   | 0,869298708  | 6,998628384 | 2,9311E-05  | 7,41638E-05 |

|          |              |             |             |             |
|----------|--------------|-------------|-------------|-------------|
| RNF26    | 0,561126935  | 6,487677941 | 2,99977E-05 | 7,58733E-05 |
| AURKAIP1 | 0,722415224  | 6,294341713 | 3,01109E-05 | 7,61312E-05 |
| VPS53    | -0,444927512 | 6,072461959 | 3,02076E-05 | 7,63476E-05 |
| ARMCX3   | -0,598990487 | 6,063551797 | 3,04836E-05 | 7,70166E-05 |
| DAB2IP   | -0,847139576 | 6,398852232 | 3,05027E-05 | 7,70362E-05 |
| SLC35F5  | 0,829494131  | 6,446403609 | 3,05315E-05 | 7,70805E-05 |
| NUTF2    | 0,65372373   | 7,183505996 | 3,07205E-05 | 7,7529E-05  |
| CDK5RAP3 | 0,562567854  | 6,718357284 | 3,0888E-05  | 7,79229E-05 |
| VEGFC    | -1,018259654 | 3,379429132 | 3,11096E-05 | 7,84529E-05 |
| CCNC     | 0,722188372  | 6,851810403 | 3,11599E-05 | 7,85505E-05 |
| HOOK2    | 0,777504268  | 5,467781042 | 3,11877E-05 | 7,85915E-05 |
| TCEAL4   | -0,554788177 | 6,278786453 | 3,12034E-05 | 7,86021E-05 |
| CNIH     | 0,860230096  | 7,201923589 | 3,13209E-05 | 7,88691E-05 |
| FADD     | 1,233896824  | 5,925031298 | 3,13461E-05 | 7,89032E-05 |
| KCNK5    | -1,19921266  | 3,884658083 | 3,15573E-05 | 7,94057E-05 |
| TNK2     | 0,929003744  | 6,340029838 | 3,16058E-05 | 7,94983E-05 |
| RHOT2    | 0,653563276  | 6,22330538  | 3,18848E-05 | 8,01704E-05 |
| DBN1     | 0,755431461  | 6,877862019 | 3,19029E-05 | 8,01866E-05 |
| HSPB11   | 0,695388845  | 4,761264854 | 3,22556E-05 | 8,10432E-05 |
| MANF     | 0,630456024  | 6,371635358 | 3,24224E-05 | 8,14322E-05 |
| RBM45    | 0,347752452  | 3,644660638 | 3,263E-05   | 8,19235E-05 |
| PEBP1    | -0,580554586 | 8,160046416 | 3,2698E-05  | 8,20423E-05 |
| SMG7     | 0,586920479  | 7,49109845  | 3,27014E-05 | 8,20423E-05 |
| C7orf49  | 0,564511535  | 5,810290536 | 3,28992E-05 | 8,24955E-05 |
| ZC3H6    | -0,55815163  | 4,089999402 | 3,29062E-05 | 8,24955E-05 |
| RASA4    | -0,695737224 | 5,570476416 | 3,36635E-05 | 8,43629E-05 |
| KIAA1598 | -0,597741701 | 5,907790163 | 3,38021E-05 | 8,46791E-05 |
| SRC      | 0,624401223  | 6,86427458  | 3,3976E-05  | 8,50835E-05 |
| SUMO1P3  | 0,565028361  | 3,064980527 | 3,4073E-05  | 8,5295E-05  |
| FNIP1    | -0,415283471 | 5,140673317 | 3,43632E-05 | 8,599E-05   |
| SLC31A1  | -0,521007277 | 6,843546969 | 3,45703E-05 | 8,64765E-05 |
| RFX1     | -0,497405757 | 4,404540515 | 3,46085E-05 | 8,65402E-05 |
| GLYR1    | -0,452864696 | 6,821804656 | 3,46664E-05 | 8,66534E-05 |
| ZNF44    | -0,529585481 | 3,543032936 | 3,49325E-05 | 8,72864E-05 |
| PDE4B    | -1,110496423 | 5,345415935 | 3,50571E-05 | 8,75658E-05 |
| APH1A    | 0,462602755  | 8,661125453 | 3,54341E-05 | 8,84749E-05 |
| BCAP29   | -0,538269412 | 6,222744081 | 3,59256E-05 | 8,96694E-05 |
| KTI12    | 0,503265078  | 3,945647359 | 3,60378E-05 | 8,99164E-05 |
| CASK     | 0,746041336  | 6,872061471 | 3,6407E-05  | 9,08045E-05 |
| CCDC88A  | -0,635537466 | 5,916811798 | 3,6537E-05  | 9,10953E-05 |
| COMMD2   | 0,823216255  | 6,680365453 | 3,65788E-05 | 9,11661E-05 |
| ADM      | 1,577564274  | 6,904223069 | 3,6606E-05  | 9,12008E-05 |
| TMEM127  | -0,393029512 | 7,284915413 | 3,66644E-05 | 9,13128E-05 |
| UQCRRS1  | 0,776013154  | 7,306085014 | 3,7294E-05  | 9,2847E-05  |
| HINFP    | 0,462904475  | 4,616654287 | 3,78716E-05 | 9,42506E-05 |
| C7orf60  | 0,728458974  | 4,885232256 | 3,81768E-05 | 9,49547E-05 |
| PAPOLA   | 0,383208318  | 8,115016166 | 3,81824E-05 | 9,49547E-05 |
| EXOSC8   | 0,704646422  | 4,802582732 | 3,82329E-05 | 9,50457E-05 |
| TMEM231  | -0,8424693   | 4,609775645 | 3,8252E-05  | 9,50585E-05 |
| RPL24    | 0,8703153    | 10,04463117 | 3,85349E-05 | 9,57265E-05 |

|          |              |             |             |             |
|----------|--------------|-------------|-------------|-------------|
| ELAVL1   | 0,431569549  | 6,989724197 | 3,8985E-05  | 9,6793E-05  |
| SYT11    | -0,978900559 | 4,960127537 | 3,89926E-05 | 9,6793E-05  |
| DKK3     | -0,903000672 | 7,402847354 | 3,90902E-05 | 9,70001E-05 |
| RECQL5   | 0,615841173  | 5,07071322  | 3,9489E-05  | 9,79539E-05 |
| ZNRF2    | 0,664783125  | 5,402287356 | 3,96827E-05 | 9,83986E-05 |
| DSTYK    | -0,502287466 | 5,299396602 | 4,00865E-05 | 9,93637E-05 |
| ZNF33A   | -0,524453537 | 5,258860166 | 4,04623E-05 | 0,000100259 |
| TMEM65   | 0,727629248  | 5,366387391 | 4,05312E-05 | 0,000100393 |
| FXC1     | -0,487994043 | 5,673249397 | 4,05787E-05 | 0,000100474 |
| TMEM41B  | -0,464071712 | 5,984018037 | 4,09564E-05 | 0,000101373 |
| BAHD1    | -0,535287226 | 5,639812149 | 4,10939E-05 | 0,000101676 |
| GRB2     | -0,372909465 | 7,983250938 | 4,12113E-05 | 0,00010193  |
| TCERG1   | 0,487291457  | 5,832792223 | 4,13778E-05 | 0,000102304 |
| RNF181   | 0,666989889  | 6,722493408 | 4,15261E-05 | 0,000102634 |
| PLA2R1   | 1,360256242  | 4,950216274 | 4,1832E-05  | 0,000103352 |
| PDF      | 0,515283696  | 3,241406752 | 4,21586E-05 | 0,000104121 |
| RAD52    | 0,678516666  | 3,284796627 | 4,23369E-05 | 0,000104524 |
| SPPL3    | 0,459103611  | 6,750656332 | 4,2655E-05  | 0,000105271 |
| FLJ10038 | -0,683614809 | 3,589819254 | 4,26961E-05 | 0,000105335 |
| RAB31    | -0,836009517 | 7,579846316 | 4,27286E-05 | 0,000105377 |
| FZR1     | 0,569569987  | 6,069291184 | 4,30371E-05 | 0,000106099 |
| NOTCH3   | 1,073887564  | 8,736029841 | 4,32768E-05 | 0,000106651 |
| USP38    | -0,510086629 | 5,547282532 | 4,34918E-05 | 0,000107143 |
| CD99L2   | -0,891822462 | 6,295278484 | 4,35384E-05 | 0,000107219 |
| SLFN5    | -0,7776435   | 5,849394288 | 4,37941E-05 | 0,000107809 |
| SFPQ     | 0,432286293  | 8,400984886 | 4,39084E-05 | 0,000108052 |
| NDUFA10  | 0,416392619  | 6,792431554 | 4,40328E-05 | 0,000108309 |
| CDH1     | 0,812786646  | 9,084365567 | 4,40447E-05 | 0,000108309 |
| FKBP14   | 0,686633599  | 4,584704946 | 4,41713E-05 | 0,000108581 |
| CXADR    | 1,140421161  | 5,94881915  | 4,43755E-05 | 0,000109044 |
| FBXO7    | -0,375049739 | 7,169313081 | 4,43954E-05 | 0,000109053 |
| UBE2A    | 0,720823355  | 7,148805151 | 4,46532E-05 | 0,000109608 |
| POP4     | 0,690977194  | 5,716018331 | 4,46533E-05 | 0,000109608 |
| MLL      | -0,653727508 | 6,359856251 | 4,47422E-05 | 0,000109787 |
| NELF     | 0,793333014  | 5,853341453 | 4,48892E-05 | 0,000110108 |
| CTDSP2   | -0,550597855 | 8,55170474  | 4,51646E-05 | 0,000110743 |
| AACS     | 0,736978023  | 6,059570309 | 4,52761E-05 | 0,000110977 |
| RAD23A   | 0,619595859  | 7,743338836 | 4,5865E-05  | 0,00011238  |
| ZBTB40   | -0,549736323 | 5,200853019 | 4,60969E-05 | 0,000112908 |
| SOD1     | 0,673904135  | 7,907967868 | 4,68508E-05 | 0,000114713 |
| TECPR2   | -0,557065472 | 5,128495699 | 4,75467E-05 | 0,000116375 |
| QTRT1    | 0,678806465  | 4,947893021 | 4,76454E-05 | 0,000116575 |
| SERPINH1 | 0,880764967  | 8,787810789 | 4,77801E-05 | 0,000116862 |
| SLC25A40 | 0,630233255  | 4,015831889 | 4,78036E-05 | 0,000116878 |
| WDR35    | -0,586209133 | 4,449922274 | 4,78417E-05 | 0,000116929 |
| KIAA0913 | -0,534677212 | 6,426642331 | 4,78601E-05 | 0,000116932 |
| ILKAP    | 0,537634691  | 5,110880301 | 4,79015E-05 | 0,000116991 |
| MYO6     | -0,613412871 | 6,843932291 | 4,82425E-05 | 0,000117782 |
| ZMIZ1    | -0,68013397  | 7,286587946 | 4,87406E-05 | 0,000118956 |
| COPS7A   | 0,581826622  | 7,199786221 | 4,91768E-05 | 0,000119973 |

|          |              |             |             |             |
|----------|--------------|-------------|-------------|-------------|
| CC2D1B   | -0,438078752 | 5,785966457 | 4,91924E-05 | 0,000119973 |
| PAK2     | 0,576350361  | 8,24530634  | 4,96943E-05 | 0,000121153 |
| MAP7D1   | -0,563708844 | 7,098804038 | 4,97154E-05 | 0,000121161 |
| HSPA1B   | 0,870102531  | 8,636363773 | 5,13792E-05 | 0,000125171 |
| RNF213   | -0,721444706 | 7,882146367 | 5,17124E-05 | 0,000125938 |
| ZZZ3     | 0,4510883    | 5,705075173 | 5,18461E-05 | 0,000126219 |
| ACTR8    | -0,363271983 | 4,5588665   | 5,18781E-05 | 0,000126251 |
| WDR6     | -0,508083321 | 6,870026257 | 5,2055E-05  | 0,000126637 |
| MTHFD1L  | 0,67793701   | 5,909074853 | 5,21239E-05 | 0,000126759 |
| CDC42SE1 | 0,463293428  | 8,157214029 | 5,23684E-05 | 0,000127308 |
| TBCB     | 0,658145385  | 6,620644002 | 5,25171E-05 | 0,000127624 |
| TMEM106B | 0,856361626  | 7,097025477 | 5,26207E-05 | 0,000127831 |
| TMCO1    | 0,692868746  | 7,430180031 | 5,34996E-05 | 0,00012992  |
| NUP133   | 0,419660638  | 6,462922355 | 5,39734E-05 | 0,000131023 |
| DNAJB6   | 0,535115725  | 7,794537432 | 5,51691E-05 | 0,000133878 |
| UTP15    | 0,429450305  | 4,286626239 | 5,52481E-05 | 0,000134022 |
| SUMF1    | -0,531275265 | 5,645345608 | 5,56497E-05 | 0,000134949 |
| FNBP1L   | -0,676428476 | 6,003647913 | 5,60141E-05 | 0,000135784 |
| GEM      | -1,045485869 | 5,278170006 | 5,68289E-05 | 0,00013771  |
| FAM129A  | -0,836786692 | 6,757695109 | 5,74315E-05 | 0,000139121 |
| RPS16    | 0,936225741  | 10,26528921 | 5,75032E-05 | 0,000139245 |
| PKN1     | -0,717805125 | 7,160557151 | 5,79353E-05 | 0,000140242 |
| SLC4A2   | -0,53804245  | 6,869904299 | 5,79658E-05 | 0,000140266 |
| NASP     | 0,635868628  | 7,158959151 | 5,81663E-05 | 0,000140701 |
| RPN2     | 0,526492763  | 9,414884433 | 5,82946E-05 | 0,000140961 |
| SEC24B   | -0,380985136 | 5,928489933 | 5,85905E-05 | 0,000141627 |
| SDHAP2   | 0,962030943  | 4,623958391 | 5,87375E-05 | 0,000141932 |
| HES4     | 1,255558901  | 2,89291156  | 5,92377E-05 | 0,00014309  |
| PLEKHM1  | -0,582767059 | 5,785079183 | 5,93632E-05 | 0,000143342 |
| KDEL1C1  | 0,791523555  | 3,62740571  | 5,94604E-05 | 0,000143526 |
| MLL2     | -0,680770168 | 6,848172752 | 5,9967E-05  | 0,000144697 |
| ZNF121   | 0,814211293  | 2,851208431 | 6,03001E-05 | 0,00014545  |
| PPAPDC1B | 1,010679622  | 6,053978038 | 6,04892E-05 | 0,000145854 |
| HSP90AA1 | 0,562107849  | 10,90700633 | 6,05464E-05 | 0,000145941 |
| PRPF8    | -0,579612479 | 8,737060027 | 6,08746E-05 | 0,00014668  |
| ATP5C1   | 0,684130083  | 7,795306255 | 6,21309E-05 | 0,000149654 |
| FADS3    | -0,842332205 | 4,689984495 | 6,2451E-05  | 0,000150372 |
| PPIL3    | 0,747244195  | 4,515584009 | 6,26758E-05 | 0,00015086  |
| CASP6    | 0,591879956  | 4,636306709 | 6,27773E-05 | 0,000151051 |
| PAPSS1   | -0,535909531 | 6,793246491 | 6,29909E-05 | 0,000151511 |
| SLC12A2  | -0,783517038 | 5,783341336 | 6,34615E-05 | 0,00015259  |
| IFI16    | 0,870681033  | 8,529170735 | 6,3494E-05  | 0,000152614 |
| RNF113A  | 0,558968714  | 4,408597969 | 6,35906E-05 | 0,000152792 |
| RPS10    | 0,917884872  | 10,35672293 | 6,36958E-05 | 0,000152991 |
| NBEAL2   | -0,695125089 | 6,166522172 | 6,39979E-05 | 0,000153662 |
| UBE2G1   | 0,452765419  | 6,652767009 | 6,47764E-05 | 0,000155477 |
| SYS1     | -0,471677913 | 5,988524202 | 6,4839E-05  | 0,000155572 |
| PPP1R9B  | -0,514084927 | 6,650020896 | 6,49113E-05 | 0,000155691 |
| ZNF282   | 0,585541203  | 5,691806854 | 6,51002E-05 | 0,000156089 |
| RPL30    | 0,598967671  | 9,951301374 | 6,5332E-05  | 0,00015659  |

|          |              |             |             |             |
|----------|--------------|-------------|-------------|-------------|
| CD9      | 1,076970978  | 10,5533288  | 6,55437E-05 | 0,000157042 |
| FAM86A   | 0,526734778  | 4,273847114 | 6,59041E-05 | 0,00015785  |
| TNFAIP1  | -0,491808346 | 7,121563641 | 6,60602E-05 | 0,000158169 |
| PTEN     | -0,584525642 | 6,720669977 | 6,62027E-05 | 0,000158454 |
| PHAX     | -0,351376229 | 4,526553576 | 6,62835E-05 | 0,000158592 |
| LLGL1    | 0,614830461  | 5,852355413 | 6,63601E-05 | 0,000158701 |
| C11orf24 | 0,530419275  | 5,855309015 | 6,63757E-05 | 0,000158701 |
| CHRAC1   | 0,489509085  | 6,114660872 | 6,65369E-05 | 0,000159031 |
| GNPDA1   | 0,499048088  | 6,406554692 | 6,671E-05   | 0,000159389 |
| CNNM3    | -0,475991775 | 5,728448225 | 6,69163E-05 | 0,000159826 |
| GPBP1    | -0,353640009 | 6,672047358 | 6,7035E-05  | 0,000160053 |
| HEBP1    | -0,498603275 | 5,786006098 | 6,72143E-05 | 0,000160425 |
| HYOU1    | 0,642034946  | 8,627013377 | 6,86316E-05 | 0,00016375  |
| APIP     | -0,501619925 | 4,719915081 | 6,88666E-05 | 0,000164254 |
| SHROOM1  | -0,584373485 | 3,728349133 | 6,89184E-05 | 0,00016432  |
| GTF2F2   | 0,549378716  | 5,132414556 | 6,90474E-05 | 0,00016457  |
| BOK      | -0,879841087 | 5,690233685 | 7,00853E-05 | 0,000166985 |
| SMN2     | 0,629724609  | 6,116559436 | 7,07287E-05 | 0,000168459 |
| APBA3    | 0,587804253  | 4,172269943 | 7,08616E-05 | 0,000168717 |
| SYNJ2    | 0,689432992  | 4,900149242 | 7,12452E-05 | 0,000169571 |
| SRF      | -0,449077804 | 6,67751775  | 7,14859E-05 | 0,000170085 |
| PDS5B    | -0,489931335 | 5,539917125 | 7,17502E-05 | 0,000170654 |
| ITGA6    | 1,252278431  | 8,952280664 | 7,20147E-05 | 0,000171223 |
| PKD1     | -0,719901643 | 6,345053943 | 7,28658E-05 | 0,000173187 |
| INSR     | -0,676638113 | 6,222634501 | 7,30266E-05 | 0,000173508 |
| SDHAF1   | 0,734239523  | 4,125917562 | 7,32351E-05 | 0,000173943 |
| FAM102A  | 0,798090279  | 7,273695386 | 7,34958E-05 | 0,000174501 |
| UBE2E2   | -0,594678741 | 4,850724347 | 7,38145E-05 | 0,000175171 |
| CUL2     | 0,504016412  | 5,961187636 | 7,3845E-05  | 0,000175171 |
| SOD2     | -0,754932756 | 9,103585143 | 7,38547E-05 | 0,000175171 |
| C10orf88 | 0,473183329  | 3,733456017 | 7,44389E-05 | 0,000176495 |
| PTAR1    | -0,502286316 | 5,503697842 | 7,47485E-05 | 0,000177167 |
| WIPF2    | -0,440117015 | 6,341688665 | 7,55071E-05 | 0,000178903 |
| C16orf13 | 0,642262202  | 5,493030183 | 7,6509E-05  | 0,000181214 |
| AASDHPPT | 0,525453799  | 6,0271959   | 7,67398E-05 | 0,000181697 |
| AES      | -0,472521131 | 8,766845364 | 7,68153E-05 | 0,000181813 |
| SGCB     | -0,663653239 | 5,756968563 | 7,75462E-05 | 0,000183479 |
| FMOD     | -0,907256377 | 6,665459586 | 7,79462E-05 | 0,000184332 |
| TUBA1B   | 0,484430722  | 10,79091465 | 7,79607E-05 | 0,000184332 |
| SH2D4A   | -0,744363271 | 4,762364218 | 7,86146E-05 | 0,000185814 |
| RARRES2  | -1,032485137 | 6,653622243 | 7,89753E-05 | 0,000186602 |
| FLYWCH1  | 0,724095351  | 5,641294787 | 7,92365E-05 | 0,000187154 |
| SSR3     | 0,652749764  | 8,547244912 | 7,93762E-05 | 0,000187397 |
| DNTTIP1  | 0,734185841  | 5,749736368 | 7,93942E-05 | 0,000187397 |
| MTHFD1   | 0,606294352  | 6,851691149 | 7,94779E-05 | 0,000187529 |
| MRPL16   | 0,444603596  | 5,544951887 | 8,1852E-05  | 0,000193064 |
| SEMA3F   | 0,868119725  | 6,808560783 | 8,21187E-05 | 0,000193626 |
| ERGIC3   | 0,555366394  | 8,603037512 | 8,2431E-05  | 0,000194296 |
| RHEB     | 0,646079298  | 7,552836033 | 8,25239E-05 | 0,000194447 |
| HSPA4    | 0,450056562  | 7,509679421 | 8,27114E-05 | 0,000194822 |

|          |              |             |             |             |
|----------|--------------|-------------|-------------|-------------|
| NUPL1    | -0,430175694 | 6,389861694 | 8,28745E-05 | 0,000195138 |
| PTGS1    | -0,934160382 | 4,978637668 | 8,29527E-05 | 0,000195255 |
| LEO1     | 0,487195776  | 5,097721056 | 8,38905E-05 | 0,000197394 |
| TBC1D9B  | -0,451980432 | 7,332528438 | 8,44064E-05 | 0,00019854  |
| C2orf43  | 0,759486442  | 5,045145829 | 8,48789E-05 | 0,000199583 |
| CYP20A1  | -0,360073422 | 5,90478319  | 8,49939E-05 | 0,000199784 |
| HGS      | 0,488238189  | 7,110597868 | 8,54218E-05 | 0,000200721 |
| ABL2     | -0,534835482 | 5,864754855 | 8,64011E-05 | 0,000202952 |
| TXNL4A   | 0,578803492  | 5,772714089 | 8,71589E-05 | 0,000204661 |
| RPS19BP1 | 0,643840202  | 6,375432125 | 8,765E-05   | 0,000205653 |
| TAGLN    | -0,960497577 | 8,461639202 | 8,76564E-05 | 0,000205653 |
| ENTPD6   | 0,613030558  | 6,8015557   | 8,76719E-05 | 0,000205653 |
| DCK      | 0,776433444  | 5,887435407 | 8,79427E-05 | 0,000206218 |
| MLXIP    | -0,615747614 | 6,02583037  | 8,9322E-05  | 0,00020938  |
| SF3B5    | 0,68050535   | 6,905810475 | 8,95144E-05 | 0,000209751 |
| IGF2R    | -0,59913826  | 8,249974857 | 8,95417E-05 | 0,000209751 |
| ACAP3    | 0,829464455  | 5,415417371 | 8,97246E-05 | 0,000210107 |
| RASA1    | -0,510516078 | 5,424830761 | 9,01441E-05 | 0,000211017 |
| MARCH5   | 0,484801682  | 6,168883997 | 9,05781E-05 | 0,00021196  |
| LRBA     | -0,64473969  | 6,374554542 | 9,20651E-05 | 0,000215366 |
| PPP1R16A | 0,783006268  | 5,150879965 | 9,21861E-05 | 0,000215575 |
| C12orf75 | 1,374574089  | 5,284718542 | 9,23515E-05 | 0,000215888 |
| PTPN12   | -0,519512516 | 7,237235669 | 9,26472E-05 | 0,000216505 |
| PTOV1    | 0,521756693  | 6,929969018 | 9,29368E-05 | 0,000217078 |
| SLC20A2  | 0,994451056  | 7,301832729 | 9,29561E-05 | 0,000217078 |
| TRPM2    | 1,017651322  | 4,519366255 | 9,31648E-05 | 0,000217491 |
| SEC63    | -0,428027717 | 7,16722037  | 9,3901E-05  | 0,000219135 |
| POLR1D   | 0,63638152   | 7,186695301 | 9,47237E-05 | 0,000220979 |
| ABCD4    | -0,441856432 | 5,059694748 | 9,52775E-05 | 0,000222195 |
| EHMT2    | 0,611409264  | 6,575541999 | 9,62966E-05 | 0,000224495 |
| HOOK3    | -0,492587202 | 6,259955524 | 9,72232E-05 | 0,000226577 |
| SF3A2    | 0,647713985  | 6,398569956 | 9,77682E-05 | 0,000227769 |
| BCL2L11  | 0,600597288  | 6,020482066 | 9,86471E-05 | 0,000229739 |
| HRSP12   | 0,677959182  | 4,325962494 | 9,91088E-05 | 0,000230735 |
| KDELR1   | 0,487260486  | 8,194967032 | 0,000100019 | 0,000232775 |
| ADNP     | 0,491671998  | 7,393643271 | 0,000100126 | 0,000232944 |
| DDX1     | 0,453501773  | 7,529232853 | 0,000100606 | 0,00023398  |
| EPB41    | -0,516155012 | 6,180033175 | 0,000100724 | 0,000234176 |
| ANP32E   | 0,60358866   | 6,930479859 | 0,000100786 | 0,00023424  |
| IDH1     | 0,820499989  | 8,062271124 | 0,000101281 | 0,000235311 |
| RAP2A    | -0,49274474  | 6,149985223 | 0,000101494 | 0,000235725 |
| PLEKHA4  | -0,816487407 | 4,739033126 | 0,000101737 | 0,00023621  |
| DENND4A  | -0,561120328 | 5,346500918 | 0,000101798 | 0,000236269 |
| F2R      | -0,719177334 | 6,272634087 | 0,000102406 | 0,0002376   |
| TCIRG1   | -0,724352948 | 6,29544548  | 0,000103156 | 0,000239259 |
| BLMH     | 0,914270736  | 6,466128615 | 0,000103921 | 0,000240951 |
| CDCA7L   | 0,972240025  | 6,133019176 | 0,000104028 | 0,000241117 |
| SIGIRR   | -0,698998827 | 4,756683442 | 0,000104184 | 0,000241396 |
| NUBP1    | -0,406431124 | 4,726813952 | 0,00010469  | 0,000242487 |
| C3orf14  | 1,043337571  | 3,887933905 | 0,000105418 | 0,00024409  |

|          |              |             |             |             |
|----------|--------------|-------------|-------------|-------------|
| SAT2     | -0,552539613 | 5,281098888 | 0,000105456 | 0,000244095 |
| PPFIBP1  | -0,625534277 | 6,681107753 | 0,000105655 | 0,000244473 |
| SEPHS1   | 0,438842731  | 6,203569909 | 0,000105772 | 0,000244661 |
| ARHGEF7  | -0,453917742 | 6,003234664 | 0,000105946 | 0,00024498  |
| GAS5     | 1,065916079  | 8,062407028 | 0,000106142 | 0,000245309 |
| NDRG2    | -0,956961869 | 6,539312074 | 0,00010616  | 0,000245309 |
| CREBZF   | 0,623005169  | 6,021416656 | 0,000107504 | 0,000248331 |
| UBXN4    | 0,435317674  | 7,867028457 | 0,000108178 | 0,000249803 |
| SNX21    | -0,550060566 | 4,50595196  | 0,000109198 | 0,000252072 |
| TWF2     | -0,518360555 | 5,742715298 | 0,000109699 | 0,000253059 |
| PPP2R5D  | 0,42818054   | 6,515769407 | 0,0001097   | 0,000253059 |
| GSN      | -0,880473797 | 9,393726846 | 0,000110156 | 0,000254025 |
| NDUF4F4  | 0,642999494  | 4,370372313 | 0,00011051  | 0,000254756 |
| STK35    | 0,601360806  | 6,527769507 | 0,00011061  | 0,000254899 |
| TMUB1    | 0,665774401  | 5,441977095 | 0,000110951 | 0,0002556   |
| DDX60    | -0,901325461 | 5,648738604 | 0,000111643 | 0,000257107 |
| SEC61A1  | 0,449806408  | 9,460621136 | 0,000111866 | 0,000257533 |
| PSMA6    | 0,774979645  | 7,764433253 | 0,000112043 | 0,000257854 |
| PSMD13   | 0,516774452  | 7,601773317 | 0,000112721 | 0,000259326 |
| PCGF6    | 0,472686794  | 4,19526209  | 0,000112808 | 0,00025944  |
| RBM19    | 0,884099634  | 5,982416572 | 0,000112985 | 0,000259759 |
| SLC2A4RG | 0,720135294  | 6,358793842 | 0,000113028 | 0,00025977  |
| RGS19    | -0,577192955 | 4,652667848 | 0,000113626 | 0,000261057 |
| TBC1D13  | -0,511080134 | 5,476532407 | 0,000114352 | 0,000262636 |
| C1orf56  | 0,508806009  | 4,030636642 | 0,000114472 | 0,000262823 |
| DPF2     | 0,357690215  | 6,392543506 | 0,000115308 | 0,000264653 |
| NUP54    | 0,638426434  | 6,044241049 | 0,000116522 | 0,000267349 |
| POLR3F   | 0,517593051  | 4,387155026 | 0,000116643 | 0,000267536 |
| PRMT7    | 0,502826828  | 5,056200417 | 0,000116793 | 0,000267791 |
| UBE2J2   | 0,496747431  | 5,936090433 | 0,000117168 | 0,00026856  |
| SUMO1    | 0,523298201  | 7,337257524 | 0,000118051 | 0,000270493 |
| CXCL10   | 1,954795464  | 6,556071294 | 0,00011965  | 0,000274066 |
| HSP90B1  | 0,4985643    | 10,43160348 | 0,000120038 | 0,000274861 |
| CCDC124  | 0,542193644  | 6,094220484 | 0,000120701 | 0,000276288 |
| WBP1     | 0,520380279  | 6,310163182 | 0,000120854 | 0,000276515 |
| OXCT1    | 0,919949061  | 5,940922958 | 0,000120881 | 0,000276515 |
| NMRAL1   | 0,700851096  | 5,670179616 | 0,000121649 | 0,000278176 |
| SLC23A2  | -0,57692428  | 5,672708188 | 0,000122472 | 0,000279965 |
| SLC9A1   | -0,643654919 | 6,562103506 | 0,000122949 | 0,000280963 |
| H3F3A    | 0,569346659  | 9,895186876 | 0,000123834 | 0,00028289  |
| TCEB2    | 0,639986192  | 7,280751382 | 0,000125588 | 0,0002868   |
| CALD1    | -0,796481336 | 8,272384865 | 0,000126028 | 0,000287709 |
| ABL1     | -0,525113349 | 6,760023129 | 0,000127167 | 0,000290211 |
| LRIG3    | 0,920679288  | 6,219218391 | 0,000127294 | 0,000290404 |
| FAP      | 1,341307212  | 5,380042278 | 0,000129862 | 0,000296118 |
| C9orf142 | 0,686269372  | 4,801118482 | 0,000129885 | 0,000296118 |
| PARP8    | -0,650420814 | 4,624586065 | 0,000130232 | 0,000296809 |
| PAAF1    | 0,619843924  | 4,916830913 | 0,000130438 | 0,00029718  |
| LPCAT4   | 0,859102838  | 5,724477287 | 0,000131024 | 0,000298413 |
| PABPN1   | 0,459758636  | 7,176404541 | 0,000131167 | 0,00029864  |

|              |              |             |             |             |
|--------------|--------------|-------------|-------------|-------------|
| SSR1         | 0,41565819   | 8,397400392 | 0,000132329 | 0,000301186 |
| PNPLA4       | 0,84346902   | 5,033946491 | 0,000132466 | 0,000301397 |
| UBE2N        | 0,521880096  | 7,40642956  | 0,000133907 | 0,000304573 |
| SDHA         | 0,588353275  | 7,598825455 | 0,000134352 | 0,000305483 |
| VPS18        | -0,440289061 | 5,672947698 | 0,000135978 | 0,000309003 |
| RNF10        | -0,346635928 | 7,725271396 | 0,00013599  | 0,000309003 |
| SBNO1        | 0,590976416  | 5,468149819 | 0,000136586 | 0,000310254 |
| TTC5         | 0,77972752   | 4,694630999 | 0,000136928 | 0,000310927 |
| ARPC5L       | 0,481780681  | 6,199682134 | 0,000137935 | 0,000313012 |
| C5orf51      | 0,537187002  | 6,154106599 | 0,000137938 | 0,000313012 |
| STON1        | -0,817362748 | 4,65640979  | 0,000138336 | 0,000313811 |
| TMX1         | 0,496942437  | 6,708786344 | 0,000138739 | 0,000314619 |
| ANXA4        | -0,568383789 | 7,483758949 | 0,000138813 | 0,000314683 |
| TNKS2        | -0,375030781 | 6,673768402 | 0,00013955  | 0,000316249 |
| LEPROT       | -0,65224424  | 5,927562801 | 0,000139619 | 0,000316299 |
| COMMD4       | 0,513560442  | 6,042564758 | 0,000140475 | 0,000318132 |
| SLC40A1      | -0,997886933 | 7,973531337 | 0,000141513 | 0,000320377 |
| SOX9         | 1,512476702  | 5,773815207 | 0,000141751 | 0,000320809 |
| LRRC59       | 0,473629866  | 8,149721779 | 0,000142944 | 0,000323403 |
| DSEL         | -0,928203087 | 4,209309375 | 0,000143487 | 0,000324523 |
| IGFBP7       | -0,816619024 | 8,64602037  | 0,000143784 | 0,000325087 |
| TXNDC15      | -0,498091203 | 6,040181751 | 0,000144137 | 0,000325777 |
| TBCA         | 0,593637947  | 6,736964256 | 0,000145029 | 0,000327685 |
| ZNF507       | 0,567714158  | 5,370297264 | 0,000145223 | 0,000328014 |
| LCMT1        | 0,44955838   | 5,319493452 | 0,000146301 | 0,000330341 |
| GIGYF2       | -0,45157832  | 6,404319398 | 0,000146489 | 0,000330654 |
| LOXL1        | 1,029579917  | 5,567167631 | 0,000146704 | 0,00033103  |
| DUSP22       | -0,63859905  | 5,784965891 | 0,000147408 | 0,000332509 |
| KRTCAP2      | 0,57708811   | 6,886596815 | 0,0001486   | 0,000335087 |
| RPL28        | 0,705139776  | 9,941300498 | 0,000148684 | 0,000335167 |
| E2F4         | 0,472513233  | 6,771699121 | 0,000149032 | 0,000335838 |
| SLC4A1AP     | 0,365775814  | 5,861924156 | 0,000149529 | 0,000336847 |
| DDX28        | 0,580343857  | 4,680154474 | 0,000150001 | 0,000337801 |
| MINK1        | -0,497749202 | 7,15765202  | 0,000150772 | 0,000339423 |
| C4orf34      | -0,627962641 | 5,377998911 | 0,000151427 | 0,000340786 |
| TRAK1        | -0,54740428  | 6,47799839  | 0,000152335 | 0,000342716 |
| TRAM1        | -0,572304214 | 8,747554746 | 0,000155273 | 0,000349211 |
| ICK          | 0,826067825  | 6,209629485 | 0,000156358 | 0,000351535 |
| DCTN1        | -0,433423771 | 7,977197407 | 0,000156514 | 0,000351769 |
| RNASEK       | -0,449974219 | 5,365756748 | 0,00015817  | 0,000355374 |
| NUDCD2       | 0,580805565  | 4,895328231 | 0,000159589 | 0,000358445 |
| ATG5         | 0,557974956  | 6,291729198 | 0,000160018 | 0,000359289 |
| FAM76A       | -0,438561321 | 4,283194231 | 0,000160797 | 0,000360921 |
| TAF10        | 0,475967879  | 6,015646419 | 0,00016149  | 0,000362356 |
| CHPT1        | -0,707198568 | 5,748955932 | 0,000162473 | 0,000364442 |
| NKG7         | -1,077204076 | 4,138156429 | 0,000162997 | 0,000365498 |
| BIRC3        | -1,128853991 | 5,648985263 | 0,000163186 | 0,0003658   |
| LOC100216545 | 1,038878646  | 2,661353211 | 0,000165712 | 0,000371342 |
| ARHGEF35     | 1,050225935  | 5,064969137 | 0,000166832 | 0,000373728 |
| PCGF3        | 0,614254629  | 6,092112864 | 0,00016762  | 0,00037537  |



|          |              |             |             |             |
|----------|--------------|-------------|-------------|-------------|
| PLOD1    | 0,754403761  | 8,222633548 | 0,000168821 | 0,000377936 |
| SLC7A6OS | 0,491715129  | 3,564719172 | 0,000170555 | 0,000381691 |
| RPS3     | 0,773782892  | 11,0675673  | 0,000171424 | 0,00038351  |
| SUN1     | 0,498175771  | 7,505726609 | 0,000171709 | 0,000384022 |
| ATP5D    | 0,617141834  | 5,924171425 | 0,000171976 | 0,000384413 |
| ABCD3    | -0,535064871 | 6,207514285 | 0,000171997 | 0,000384413 |
| XPNPEP1  | 0,451856498  | 6,514644188 | 0,000175698 | 0,000392558 |
| ATG7     | -0,397266336 | 5,778551835 | 0,00017643  | 0,000394064 |
| RIOK2    | -0,353899748 | 4,650979199 | 0,000176924 | 0,000395038 |
| ECSIT    | 0,569815918  | 5,708502555 | 0,000178791 | 0,000399077 |
| PRR3     | 0,589877332  | 4,189102179 | 0,000179071 | 0,00039957  |
| IFITM3   | -0,749940471 | 9,167188006 | 0,00018088  | 0,000403475 |
| JTB      | 0,536068751  | 7,650678938 | 0,000181523 | 0,000404776 |
| NDUFB10  | 0,512352309  | 6,349453951 | 0,000184753 | 0,000411843 |
| CAPZA1   | 0,483730002  | 8,289712796 | 0,000184824 | 0,000411868 |
| MKLN1    | -0,328363329 | 6,310982083 | 0,000185188 | 0,000412543 |
| IAH1     | 0,69004566   | 5,770455263 | 0,000188174 | 0,000419058 |
| CDC42BPB | -0,56140769  | 7,541737059 | 0,000189463 | 0,000421791 |
| UBR2     | -0,396745085 | 5,716764911 | 0,000192548 | 0,000428521 |
| DCAF8    | -0,37275282  | 6,76770048  | 0,000192903 | 0,00042917  |
| SLC25A36 | 0,655813155  | 6,918527941 | 0,000194176 | 0,000431861 |
| TXN2     | 0,503440724  | 6,867762971 | 0,000195938 | 0,000435638 |
| LIN37    | 0,563608582  | 3,526025592 | 0,000196129 | 0,00043592  |
| MT2A     | -1,02416301  | 7,655890616 | 0,000198425 | 0,00044088  |
| LIN7C    | 0,488940159  | 6,041477509 | 0,000198635 | 0,000441202 |
| NEDD1    | 0,908780165  | 5,652736139 | 0,000199654 | 0,000443322 |
| POLRMT   | 0,58703471   | 5,846649537 | 0,00020009  | 0,000444145 |
| JAK2     | -0,800410251 | 4,834035171 | 0,000202401 | 0,000449128 |
| SLC39A14 | 0,846846915  | 6,900402042 | 0,00020291  | 0,000450111 |
| EIF3E    | 0,584835172  | 9,026073866 | 0,000203573 | 0,000451435 |
| GSK3A    | 0,480448557  | 6,961617298 | 0,000204406 | 0,000453135 |
| POLR3H   | -0,440402627 | 6,4286745   | 0,000205802 | 0,000456081 |
| PHF20L1  | 0,398758506  | 6,145359574 | 0,000209247 | 0,000463565 |
| HCCS     | 0,549127081  | 5,371441888 | 0,00021033  | 0,000465813 |
| RALGDS   | -0,52994834  | 6,803288863 | 0,000210436 | 0,000465898 |
| NKIRAS1  | -0,449364081 | 3,491331469 | 0,000211167 | 0,000467365 |
| NUDT16L1 | 0,663636965  | 5,188959166 | 0,000211255 | 0,000467406 |
| GNPTAB   | -0,443722557 | 6,883396849 | 0,000213951 | 0,000473218 |
| COPS2    | 0,502444808  | 7,005942565 | 0,000214889 | 0,000475138 |
| PPP1R10  | -0,437548    | 6,756053438 | 0,000215102 | 0,000475456 |
| GALNT1   | 0,745619298  | 7,822082712 | 0,000215223 | 0,00047557  |
| ZRSR2    | -0,532785826 | 3,567115008 | 0,000216073 | 0,000477293 |
| PIH1D1   | 0,446722549  | 6,040783874 | 0,000216356 | 0,000477763 |
| DDX27    | 0,520232736  | 6,455050488 | 0,000218081 | 0,000481415 |
| CCDC90B  | 0,574126716  | 5,701015529 | 0,000218266 | 0,000481668 |
| OXSM     | 0,553602619  | 3,598955831 | 0,000218434 | 0,000481883 |
| NPAS2    | 1,051716685  | 5,245162428 | 0,000218635 | 0,000482078 |
| TMEM175  | -0,607412489 | 4,31981096  | 0,000218664 | 0,000482078 |
| ABII     | 0,474028631  | 7,18009214  | 0,00021926  | 0,000483237 |
| SLC39A4  | 0,89800125   | 5,350687227 | 0,000219504 | 0,000483618 |

|           |              |             |             |             |
|-----------|--------------|-------------|-------------|-------------|
| FAM188A   | -0,492733535 | 4,53060546  | 0,000222231 | 0,000489468 |
| ZCCHC7    | 0,594545455  | 5,078237252 | 0,000224007 | 0,000493221 |
| MAD2L1BP  | 0,473798792  | 5,090911965 | 0,00022448  | 0,000494103 |
| GOLM1     | 0,794586002  | 6,962796912 | 0,00022533  | 0,000495814 |
| NBPF14    | -0,632657342 | 4,719709304 | 0,000226502 | 0,000498231 |
| PRKACA    | -0,384243167 | 6,7554419   | 0,000227103 | 0,000499392 |
| C17orf70  | 0,536154252  | 5,64939339  | 0,000227186 | 0,000499414 |
| TOMM34    | 0,563860538  | 6,071227589 | 0,000227503 | 0,00049995  |
| SGK3      | -0,434203041 | 5,064025258 | 0,000227874 | 0,000500604 |
| NHP2L1    | 0,485579467  | 7,5747456   | 0,00022978  | 0,000504628 |
| BRD9      | 0,602627519  | 6,153225041 | 0,000230685 | 0,000506453 |
| RPS8      | 0,735432773  | 10,61323735 | 0,000231536 | 0,000508157 |
| CAPRIN1   | 0,429192816  | 8,712167711 | 0,00023163  | 0,000508201 |
| CCDC93    | -0,448808547 | 5,456819401 | 0,000232107 | 0,000509082 |
| MT1E      | -1,186934126 | 5,588143906 | 0,000232582 | 0,000509959 |
| CSF2RB    | -1,139067024 | 5,338149683 | 0,000232746 | 0,000510157 |
| DGCR6L    | 0,776622958  | 6,138426724 | 0,000233085 | 0,000510734 |
| KDELR2    | 0,548791169  | 8,807052958 | 0,000233172 | 0,000510761 |
| NEK1      | -0,579166161 | 4,291629877 | 0,000233465 | 0,00051124  |
| LGALS9    | -0,819228458 | 6,878418222 | 0,000234036 | 0,000512325 |
| MUS81     | 0,424890547  | 5,255568181 | 0,000235196 | 0,000514699 |
| RAVER1    | 0,567561305  | 6,564833907 | 0,000235832 | 0,000515925 |
| ARHGAP21  | -0,547498981 | 6,810650771 | 0,000237235 | 0,000518827 |
| ATAD2B    | 0,500827882  | 4,614250073 | 0,000239258 | 0,000523085 |
| EIF2AK2   | 0,634797572  | 5,674503736 | 0,000239364 | 0,000523148 |
| KIAA1731  | 0,570260518  | 4,445080299 | 0,000240588 | 0,000525655 |
| KLHDC3    | 0,561009625  | 7,252389272 | 0,000240684 | 0,000525697 |
| CRKL      | 0,603502311  | 7,833947395 | 0,000242801 | 0,00053015  |
| PLAUR     | -0,77838753  | 6,498786278 | 0,000245478 | 0,000535824 |
| KIAA1468  | 0,563170627  | 5,602293651 | 0,000246098 | 0,000537006 |
| RBM42     | 0,536554576  | 6,568925156 | 0,000246486 | 0,00053768  |
| PRKRIP1   | 0,425645393  | 5,018495664 | 0,000246777 | 0,000538144 |
| FAM193A   | -0,479606754 | 5,139587208 | 0,000249015 | 0,000542849 |
| SIL1      | -0,408467407 | 5,954258176 | 0,000250461 | 0,000545618 |
| FAS       | -0,798282432 | 5,207076739 | 0,000250473 | 0,000545618 |
| LOC387647 | -0,533962138 | 4,683716805 | 0,000250525 | 0,000545618 |
| TRIP6     | 0,743724566  | 6,810886747 | 0,000250777 | 0,000545992 |
| ZNF558    | 0,703727394  | 4,711745951 | 0,000251111 | 0,000546544 |
| TRIM4     | -0,433276927 | 5,645883296 | 0,000251547 | 0,000547319 |
| ZNHIT1    | 0,765371639  | 6,560508901 | 0,000251718 | 0,000547516 |
| MANBA     | -0,520255978 | 5,90856592  | 0,00025231  | 0,000548629 |
| VPRBP     | -0,36648691  | 5,735011737 | 0,000252478 | 0,000548821 |
| CNBP      | 0,45502249   | 9,475404151 | 0,000253136 | 0,000550076 |
| COMMD5    | 0,485921284  | 5,409009472 | 0,00026024  | 0,000565331 |
| SAMD4B    | 0,629976885  | 7,290207481 | 0,000263123 | 0,000571413 |
| YRDC      | 0,603393398  | 5,298274698 | 0,000263803 | 0,000572707 |
| PSMD1     | 0,37366519   | 7,472437214 | 0,00026448  | 0,000573994 |
| ST3GAL1   | -0,787713791 | 6,942829167 | 0,000265888 | 0,000576866 |
| NSUN3     | 0,771197322  | 3,78557061  | 0,000269555 | 0,000584635 |
| CCDC130   | 0,585491372  | 4,610153466 | 0,000269977 | 0,000585366 |

|           |              |             |             |             |
|-----------|--------------|-------------|-------------|-------------|
| CCDC66    | -0,395895442 | 3,643580913 | 0,000270323 | 0,000585928 |
| DPY19L4   | 0,519867259  | 6,187595565 | 0,000270553 | 0,000586241 |
| SMURF2    | -0,497833971 | 5,497552479 | 0,000271557 | 0,00058823  |
| FAM102B   | -0,519767312 | 5,148094623 | 0,000273173 | 0,000591363 |
| ELMO2     | -0,420691691 | 5,974757599 | 0,000273177 | 0,000591363 |
| ATXN10    | 0,500868324  | 7,683224857 | 0,000273594 | 0,000592077 |
| INO80D    | -0,45859869  | 4,551233602 | 0,000274456 | 0,000593756 |
| YARS      | 0,409703565  | 7,392576344 | 0,000275358 | 0,000595518 |
| TLL4      | 0,738655211  | 5,409889152 | 0,000279059 | 0,00060333  |
| RANBP10   | -0,42892275  | 5,224471853 | 0,00027917  | 0,000603379 |
| CD14      | -0,800760388 | 6,916073324 | 0,000280352 | 0,000605606 |
| TMEM219   | -0,509715684 | 6,755440438 | 0,000280378 | 0,000605606 |
| LRRC58    | 0,597709395  | 6,745988598 | 0,000281633 | 0,000608124 |
| ZNF789    | 0,642502832  | 2,612019266 | 0,00028297  | 0,000610817 |
| RPIA      | 0,604501293  | 5,378596426 | 0,000283984 | 0,000612813 |
| C12orf44  | 0,528271046  | 6,285927083 | 0,000285892 | 0,000616734 |
| PQBP1     | 0,522220943  | 6,264862331 | 0,000286409 | 0,000617654 |
| CRELD2    | 0,59848435   | 5,899634633 | 0,000289935 | 0,000625062 |
| NDUFAF3   | -0,41559182  | 5,76315292  | 0,000291176 | 0,000627538 |
| TFRC      | 1,243975625  | 10,16466421 | 0,000296382 | 0,000638556 |
| RAB11FIP3 | -0,616751148 | 5,547186508 | 0,000298897 | 0,000643772 |
| POLR2B    | 0,484798073  | 7,369448719 | 0,000299326 | 0,000644492 |
| SIRT6     | 0,438983349  | 4,294231218 | 0,000299572 | 0,000644818 |
| MRPL32    | 0,620655725  | 5,803586731 | 0,000299873 | 0,000645262 |
| KHDRBS1   | 0,29385977   | 7,943968268 | 0,000300172 | 0,000645701 |
| SEPHS2    | 0,607282274  | 7,01546793  | 0,000300624 | 0,00064647  |
| ZNF768    | 0,521832354  | 5,720977879 | 0,000301992 | 0,000649207 |
| C9orf89   | 0,678372273  | 4,591850452 | 0,000303462 | 0,00065216  |
| EPC2      | -0,383661729 | 5,216819512 | 0,000304507 | 0,000654201 |
| XRCC5     | 0,386223898  | 8,944337297 | 0,000305006 | 0,000655067 |
| SGK196    | 0,956209273  | 2,218772978 | 0,000307301 | 0,000659787 |
| ACD       | 0,468542803  | 4,759371144 | 0,000308345 | 0,00066182  |
| WDR5B     | 0,585259928  | 4,337995591 | 0,000310327 | 0,000665865 |
| BET1      | 0,701779157  | 5,13434171  | 0,000313713 | 0,000672919 |
| TMEM57    | -0,446015223 | 5,35122192  | 0,000314532 | 0,000674463 |
| ZNF260    | 0,565255148  | 5,277429178 | 0,000316697 | 0,000678892 |
| CSNK1E    | 0,453612001  | 7,285664023 | 0,000316928 | 0,000679175 |
| MMAA      | -0,444078833 | 3,589155554 | 0,000320424 | 0,000686449 |
| ITGAV     | 0,767782645  | 8,305273468 | 0,000323769 | 0,000693399 |
| CCNG1     | -0,517638735 | 6,444703716 | 0,000324123 | 0,000693939 |
| STK38L    | 0,656743733  | 6,524559127 | 0,000328418 | 0,000702913 |
| SPRED2    | -0,517481337 | 6,143770294 | 0,000329124 | 0,000704204 |
| CCNB1IP1  | 0,73192483   | 6,085082111 | 0,00032972  | 0,000705257 |
| MED13L    | -0,567661306 | 6,925926746 | 0,000330772 | 0,000707285 |
| GRWD1     | 0,402066204  | 5,974959009 | 0,00033202  | 0,000709732 |
| NRP2      | -0,868788946 | 6,624060892 | 0,000332668 | 0,000710895 |
| RP9       | 0,499883448  | 3,814259736 | 0,000333002 | 0,000711384 |
| TMEM203   | 0,429332196  | 5,90460395  | 0,000333665 | 0,000712578 |
| DCAF5     | -0,430371802 | 6,401556443 | 0,000336009 | 0,000717359 |
| NDUFB7    | 0,859563305  | 6,526458358 | 0,000337221 | 0,000719721 |

|           |              |             |             |             |
|-----------|--------------|-------------|-------------|-------------|
| MARK4     | 0,523830711  | 5,799430022 | 0,000341245 | 0,000728082 |
| METTL4    | 0,58612817   | 4,317607668 | 0,000344158 | 0,000734068 |
| GOS2      | -1,137278082 | 4,420545773 | 0,000346527 | 0,000738889 |
| ESYT2     | -0,416909504 | 7,543532575 | 0,000346923 | 0,000739501 |
| TMEM185B  | 0,517445674  | 5,66646227  | 0,000347775 | 0,000741087 |
| MRPL10    | 0,418023658  | 6,062854879 | 0,000348241 | 0,000741847 |
| ENO2      | 1,114911195  | 6,948690472 | 0,000348463 | 0,000742089 |
| PRKRA     | 0,46686799   | 6,221455411 | 0,000350425 | 0,000746034 |
| ECHS1     | 0,544829863  | 7,358662647 | 0,000352589 | 0,000750407 |
| KLHL24    | 0,831711067  | 7,337224684 | 0,000352887 | 0,000750808 |
| DHRS7     | -0,569970837 | 6,293086897 | 0,00035408  | 0,00075311  |
| MTFMT     | 0,387490317  | 4,516448187 | 0,000356747 | 0,000758492 |
| SNX6      | 0,533639277  | 7,384391837 | 0,000356833 | 0,000758492 |
| THAP4     | 0,43617603   | 6,193100189 | 0,000357095 | 0,000758813 |
| TMEM109   | -0,430636207 | 7,723074973 | 0,000358189 | 0,0007609   |
| ZNF37A    | -0,542356311 | 4,422055969 | 0,000360806 | 0,00076622  |
| RPL13AP20 | 0,608515023  | 5,158371724 | 0,000361263 | 0,000766954 |
| NDUFA13   | 0,691134457  | 7,603910926 | 0,000362415 | 0,000769159 |
| CCDC88B   | -0,647467231 | 4,474549091 | 0,000364013 | 0,00077231  |
| CPSF1     | 0,603118707  | 6,754663225 | 0,000364285 | 0,000772647 |
| EIF2B2    | 0,463862366  | 5,490499273 | 0,000364438 | 0,00077273  |
| TMBIM4    | -0,554241892 | 6,377622133 | 0,000365801 | 0,00077538  |
| HPS1      | -0,380197728 | 6,381175236 | 0,00036599  | 0,00077554  |
| TRAF3IP1  | -0,415512203 | 4,901395268 | 0,000366308 | 0,000775972 |
| HIVEP1    | -0,613196571 | 5,545562655 | 0,000366981 | 0,000777157 |
| MRPL22    | 0,605777022  | 4,803596437 | 0,000367642 | 0,000778315 |
| ATP9B     | 0,789339608  | 7,022896086 | 0,000371696 | 0,000786501 |
| PARG      | 0,370261125  | 5,120328263 | 0,00037174  | 0,000786501 |
| FMNL2     | -0,547990132 | 6,362230324 | 0,000372005 | 0,000786817 |
| UBL5      | 0,774411332  | 7,352764814 | 0,00037337  | 0,00078946  |
| TSPAN15   | -0,716152812 | 5,988559557 | 0,000375257 | 0,000793204 |
| TMEM123   | 0,697780512  | 9,280577412 | 0,000376921 | 0,000796475 |
| NDOR1     | 0,528207841  | 5,090949136 | 0,000377622 | 0,00079771  |
| RBM14     | 0,324070912  | 6,14613788  | 0,000378818 | 0,000799988 |
| RIT1      | 0,940183985  | 6,884122288 | 0,000379297 | 0,000800751 |
| TMEM50B   | -0,588998355 | 6,016474744 | 0,000380008 | 0,000802003 |
| PXMP2     | 0,695174464  | 3,857923416 | 0,000384143 | 0,000810481 |
| SLMAP     | -0,33936022  | 5,885679672 | 0,000386282 | 0,000814741 |
| IMPA2     | 0,955108543  | 6,635965877 | 0,000392128 | 0,000826814 |
| PPAP2A    | -0,676095191 | 5,494001933 | 0,000394405 | 0,000831359 |
| ASTE1     | 0,52189871   | 4,120001699 | 0,000395444 | 0,000833101 |
| MLH1      | -0,342970637 | 5,448461001 | 0,000395503 | 0,000833101 |
| BCL2L1    | -0,485426936 | 7,606699918 | 0,000395598 | 0,000833101 |
| MEIS1     | -0,734585657 | 4,803685146 | 0,000395736 | 0,000833135 |
| DGCR14    | 0,486211177  | 4,822898677 | 0,000397294 | 0,000836156 |
| MCM3AP    | -0,446351734 | 6,559482956 | 0,000402512 | 0,000846877 |
| COPG2     | 0,542827951  | 6,116909142 | 0,000409491 | 0,000861296 |
| COMMD3    | 0,677550504  | 5,718294369 | 0,000411086 | 0,000864384 |
| STK38     | 0,535520253  | 6,706605191 | 0,000413563 | 0,000869324 |
| PRELID1   | 0,532044643  | 7,198495357 | 0,000413968 | 0,000869906 |

|               |              |             |             |             |
|---------------|--------------|-------------|-------------|-------------|
| NCKAP1        | 0,458821403  | 8,454914086 | 0,000415306 | 0,000872449 |
| PEX13         | 0,556351172  | 6,44046114  | 0,000416419 | 0,000874519 |
| NAA35         | 0,434413662  | 4,922853546 | 0,000416931 | 0,000875324 |
| GNPTG         | -0,465818602 | 5,913659041 | 0,000420803 | 0,000883182 |
| AKT3          | -0,890428286 | 5,237051917 | 0,000423377 | 0,00088831  |
| KANK1         | -0,697123914 | 5,879905945 | 0,000429025 | 0,000899884 |
| IMPDH2        | 0,470864647  | 7,410013164 | 0,000434714 | 0,000911537 |
| MAPK8IP3      | 0,85981761   | 5,541331277 | 0,000439857 | 0,000922037 |
| RPRD1A        | 0,672349104  | 6,738001686 | 0,000441555 | 0,000925311 |
| ZNF143        | 0,319665494  | 4,677335195 | 0,00044503  | 0,000932308 |
| DKFZP586I1420 | -0,570448583 | 3,511310029 | 0,000448593 | 0,000939483 |
| CSTB          | 0,947342031  | 9,274855702 | 0,000449212 | 0,00094049  |
| MYEOV2        | 0,770767005  | 5,545404608 | 0,000454239 | 0,000950723 |
| TMEM14B       | 0,77545734   | 6,745807132 | 0,000463995 | 0,000970845 |
| ANKRD13C      | -0,31142747  | 4,952236586 | 0,000464698 | 0,000972018 |
| C7orf13       | 1,057515483  | 3,579860837 | 0,000468013 | 0,00097865  |
| SLC25A22      | 0,622363197  | 5,225172008 | 0,000468397 | 0,000979153 |
| NBPF9         | -0,545754841 | 4,710279588 | 0,000470343 | 0,000982921 |
| C21orf91      | 0,973558583  | 5,979270632 | 0,000471204 | 0,000984417 |
| ARHGEF10L     | -0,614028042 | 5,132129502 | 0,000471696 | 0,000985145 |
| TNRC6C        | -0,642616107 | 4,483595899 | 0,000474292 | 0,000990263 |
| SLC10A7       | -0,434200494 | 3,827287972 | 0,000476774 | 0,00099514  |
| DECR2         | 0,721645016  | 4,190463445 | 0,000478118 | 0,000997639 |
| C1orf43       | 0,560122966  | 8,667461124 | 0,000479578 | 0,00100038  |
| CALR          | 0,406501951  | 10,70901354 | 0,00048142  | 0,001003915 |
| SSNA1         | 0,507254473  | 5,9985456   | 0,00048366  | 0,001008278 |
| ZNF12         | 0,406559452  | 5,596939216 | 0,00048436  | 0,00100943  |
| RPL12         | 0,569119877  | 10,03155344 | 0,000487736 | 0,001016092 |
| RARRES3       | -0,96235054  | 5,891517496 | 0,000487855 | 0,001016092 |
| RNF215        | 0,565619033  | 4,206796556 | 0,000488654 | 0,001017412 |
| LAS1L         | 0,410218855  | 5,871281216 | 0,000488788 | 0,001017412 |
| ASCC2         | 0,469593137  | 6,853552224 | 0,000494045 | 0,001028042 |
| BCL7C         | 0,670521501  | 5,611383203 | 0,000495534 | 0,001030825 |
| SNRPB2        | 0,457637428  | 6,18435042  | 0,000496807 | 0,001033159 |
| FOXF2         | -0,853195105 | 4,039129747 | 0,000498223 | 0,001035787 |
| MINA          | 0,475846327  | 5,965931648 | 0,000499175 | 0,001037449 |
| SUZ12         | 0,530301915  | 6,278164159 | 0,00049978  | 0,001038392 |
| GBAS          | 0,79297669   | 7,230530421 | 0,000500063 | 0,001038662 |
| ITPRIPL2      | -0,565580408 | 6,824708296 | 0,000500362 | 0,001038758 |
| NAGA          | -0,398685383 | 6,469975868 | 0,000500414 | 0,001038758 |
| CLDN12        | 0,59580253   | 6,07968328  | 0,000503741 | 0,001045347 |
| HIST2H2BE     | 1,184897045  | 5,513151305 | 0,000505292 | 0,001048246 |
| PBX3          | -0,676176556 | 4,860138559 | 0,000506828 | 0,001051113 |
| ZNF274        | -0,499968416 | 4,826471529 | 0,000507133 | 0,001051426 |
| HERC6         | -0,834767956 | 5,02762253  | 0,000508033 | 0,001052971 |
| C12orf65      | 0,399951513  | 4,919927915 | 0,000510065 | 0,001056699 |
| BHLHE41       | -0,951357775 | 5,073734484 | 0,000510141 | 0,001056699 |
| CITED4        | 1,352952678  | 4,425429532 | 0,000510452 | 0,001057022 |
| IPO13         | 0,467483657  | 6,086214297 | 0,000514625 | 0,001065235 |
| YBX1          | 0,560851537  | 9,907658073 | 0,000514731 | 0,001065235 |

|           |              |             |             |             |
|-----------|--------------|-------------|-------------|-------------|
| PTPLAD1   | 0,510605215  | 7,619766736 | 0,000516813 | 0,00106922  |
| UQCC      | 0,483862266  | 5,67518678  | 0,000517947 | 0,00107124  |
| SKIV2L    | 0,430250656  | 6,192648917 | 0,000518457 | 0,001071971 |
| TWISTNB   | 0,485404117  | 5,479591966 | 0,00051944  | 0,001073678 |
| SMN1      | 0,5033857    | 2,049184743 | 0,000522045 | 0,001078734 |
| METRNL    | -0,699181767 | 5,271949164 | 0,000523196 | 0,001080786 |
| LEMD2     | 0,435859526  | 6,019044581 | 0,000523497 | 0,00108108  |
| TTC14     | 0,717149902  | 5,246723344 | 0,000524546 | 0,001082919 |
| H19       | 2,953820636  | 9,284624338 | 0,000529263 | 0,001092326 |
| NOSIP     | 0,61474864   | 5,89577667  | 0,000533958 | 0,001101682 |
| PANK3     | 0,572230318  | 5,398565591 | 0,000536503 | 0,001106598 |
| FN1       | -1,032598269 | 11,82620959 | 0,000544626 | 0,001123014 |
| SYPL1     | 0,613518886  | 8,117706991 | 0,000546509 | 0,001126556 |
| ZNF259    | 0,457035253  | 6,14367278  | 0,000547903 | 0,001129088 |
| RPS4X     | 0,589685032  | 10,85907993 | 0,000548379 | 0,001129728 |
| HIST1H2BC | 1,253019799  | 2,611955718 | 0,000556037 | 0,001145158 |
| ARHGEF5   | 0,840862425  | 7,019089803 | 0,000558598 | 0,001150085 |
| SNX18     | -0,469182128 | 5,728821004 | 0,000559307 | 0,001151197 |
| KLHL5     | 0,656866624  | 6,508751367 | 0,000559756 | 0,001151774 |
| POLR3E    | 0,415601628  | 5,515372814 | 0,000560831 | 0,001153637 |
| ITM2C     | 0,714002058  | 7,611291809 | 0,000561184 | 0,001154014 |
| API5      | 0,388220567  | 7,593247575 | 0,000562272 | 0,001155904 |
| MSC       | 1,535097322  | 4,941579428 | 0,000566134 | 0,001163493 |
| LIMA1     | 0,682011497  | 7,919186148 | 0,000571837 | 0,001174858 |
| CDC42SE2  | -0,440173086 | 6,615720104 | 0,000578797 | 0,001188799 |
| PTP4A2    | -0,393662759 | 7,153157877 | 0,000580859 | 0,001192676 |
| NT5DC3    | 0,684238462  | 4,913521048 | 0,000583906 | 0,001198571 |
| PRPF31    | 0,42305176   | 6,3078716   | 0,000584639 | 0,001199715 |
| ZNF251    | 0,686064944  | 4,283145899 | 0,000585668 | 0,001201104 |
| ITGB1BP1  | 0,471079155  | 6,29833093  | 0,000585697 | 0,001201104 |
| RRAGA     | -0,394630725 | 6,643447566 | 0,000585942 | 0,001201104 |
| SRP68     | 0,355255577  | 7,418576701 | 0,00058602  | 0,001201104 |
| FKBP10    | 1,017656309  | 7,42691282  | 0,000587288 | 0,001203341 |
| C6orf57   | 0,943871179  | 3,452137443 | 0,000587654 | 0,001203729 |
| PSMC5     | 0,36794665   | 7,486388355 | 0,000589    | 0,001206123 |
| ORAOV1    | 1,09684974   | 4,594970996 | 0,000590077 | 0,001207966 |
| MEGF9     | -0,785951768 | 6,720062206 | 0,000594385 | 0,001216419 |
| PSEN1     | -0,335875323 | 6,928796108 | 0,000595501 | 0,001218338 |
| EIF3H     | 0,417494438  | 8,3188637   | 0,00060247  | 0,001232227 |
| PSMG4     | 0,564396567  | 3,912050009 | 0,000602783 | 0,001232496 |
| CUL4B     | 0,401338601  | 6,943394805 | 0,000605911 | 0,001238521 |
| SRPX2     | 1,099942518  | 5,03391992  | 0,000612342 | 0,001251292 |
| KLRK1     | -0,823529747 | 2,754899212 | 0,000615502 | 0,001257371 |
| CHD1L     | 0,473762576  | 6,028698464 | 0,000617602 | 0,001261283 |
| COX17     | 0,663958599  | 5,487499728 | 0,000619929 | 0,001265657 |
| ITGA2     | 1,047909016  | 7,416141088 | 0,000626832 | 0,001279367 |
| ATXN1     | -0,492951755 | 6,003504186 | 0,000633886 | 0,001293379 |
| S100PBP   | 0,3587956    | 5,13957164  | 0,000636098 | 0,001297503 |
| DAG1      | -0,403896413 | 7,612106775 | 0,000638209 | 0,00130142  |
| SRD5A3    | 0,989913277  | 6,049062116 | 0,000639081 | 0,001302807 |

|           |              |             |             |             |
|-----------|--------------|-------------|-------------|-------------|
| DHRS7B    | -0,532060461 | 4,871576116 | 0,000640665 | 0,001305415 |
| IL13RA1   | -0,478862271 | 7,572329143 | 0,000640743 | 0,001305415 |
| ZNF621    | -0,381216638 | 4,811459039 | 0,00064136  | 0,001306283 |
| MAP2K2    | 0,400173935  | 7,148270455 | 0,000643283 | 0,001309808 |
| MED14     | 0,404964563  | 6,529813478 | 0,000643656 | 0,001309959 |
| GALNT2    | 0,631758666  | 7,904179668 | 0,00064379  | 0,001309959 |
| EMB       | -0,7779553   | 5,481107916 | 0,000643933 | 0,001309959 |
| RPL27     | 0,758595214  | 9,980831509 | 0,000644799 | 0,001311329 |
| TAF4      | 0,48969795   | 4,872760109 | 0,000649232 | 0,00131995  |
| PSMD9     | 0,416526264  | 6,096420097 | 0,000651526 | 0,001324219 |
| PPP1CB    | 0,483002946  | 9,334374218 | 0,00065469  | 0,001330253 |
| RHOF      | -0,829790495 | 4,062089677 | 0,000655187 | 0,001330868 |
| EIF2S1    | 0,41164672   | 7,068426567 | 0,00065737  | 0,001334904 |
| DDX54     | 0,491170228  | 6,701148659 | 0,000658618 | 0,00133704  |
| FAF1      | 0,404659798  | 6,250379969 | 0,000659441 | 0,001338311 |
| STT3A     | 0,428952592  | 7,983984462 | 0,00066625  | 0,001351727 |
| CHMP7     | -0,366577912 | 5,765081623 | 0,000667922 | 0,001354717 |
| C11orf54  | -0,566051641 | 4,872315173 | 0,000675478 | 0,001369636 |
| MARK2     | 0,447069169  | 6,722261147 | 0,000679456 | 0,001377292 |
| PCBP2     | 0,330188051  | 9,921226024 | 0,000680076 | 0,001378139 |
| ASB3      | 0,419327367  | 4,793900837 | 0,000684786 | 0,001387271 |
| NRAS      | 0,50781503   | 7,256514192 | 0,00068601  | 0,001389338 |
| PAPD7     | 0,530990848  | 5,83718423  | 0,000686845 | 0,001390616 |
| CRYL1     | -0,657928636 | 5,036103327 | 0,000688358 | 0,001393267 |
| PHF1      | -0,387105785 | 5,881671954 | 0,000691396 | 0,001399    |
| C9orf3    | 0,764866385  | 6,297657477 | 0,000695102 | 0,001406082 |
| DBR1      | 0,434785913  | 5,22772848  | 0,00069659  | 0,001408673 |
| SMCR7L    | 0,399764506  | 6,460616077 | 0,000698825 | 0,001412775 |
| LUC7L3    | 0,521167934  | 6,57965103  | 0,000703951 | 0,001422715 |
| POLR1A    | 0,612134586  | 5,886976731 | 0,000705978 | 0,00142639  |
| PIAS4     | 0,455684389  | 4,402076416 | 0,000711793 | 0,001437712 |
| UQCRQ     | 0,698066342  | 6,682202725 | 0,000718196 | 0,001450179 |
| RARS2     | 0,506762425  | 5,950963897 | 0,000718391 | 0,001450179 |
| AKT2      | 0,636646646  | 7,455924512 | 0,000727395 | 0,001467921 |
| URB1      | 0,588188184  | 6,142667528 | 0,000734249 | 0,001481315 |
| RBAK      | 0,486749085  | 5,02834358  | 0,000736532 | 0,00148548  |
| LOC441454 | 0,507054494  | 1,714960863 | 0,000737643 | 0,001487283 |
| PIAS2     | 0,685094638  | 4,7139505   | 0,000739935 | 0,001491462 |
| SUCLG1    | 0,547518328  | 6,85999474  | 0,000747179 | 0,001505619 |
| BZW1      | 0,502925819  | 8,930823662 | 0,000754078 | 0,001519071 |
| TERF1     | 0,398173031  | 5,649585773 | 0,000755981 | 0,001522456 |
| CLP1      | 0,367335345  | 4,436418092 | 0,00076218  | 0,001534486 |
| CSRP2BP   | 0,43287185   | 5,448857297 | 0,000763046 | 0,001535776 |
| FAM160A2  | -0,385602591 | 5,122096283 | 0,000765596 | 0,001540454 |
| TBC1D4    | -0,529298485 | 5,584874506 | 0,000767298 | 0,001543103 |
| HDGFRP3   | 0,656654377  | 6,119523201 | 0,00076743  | 0,001543103 |
| NUFIP1    | 0,443288307  | 4,038666993 | 0,000767592 | 0,001543103 |
| WDR61     | 0,563204297  | 6,365743956 | 0,000773283 | 0,001554087 |
| UBA5      | 0,362210347  | 5,983959631 | 0,000775021 | 0,001557122 |
| DHX40     | 0,490625251  | 6,762964626 | 0,000778763 | 0,001564177 |

|          |              |             |             |             |
|----------|--------------|-------------|-------------|-------------|
| SFMBT2   | -0,586308875 | 2,587603782 | 0,000783563 | 0,001573356 |
| CAMKK2   | -0,323209215 | 6,453011821 | 0,000798945 | 0,00160377  |
| EML3     | -0,379210916 | 5,714666262 | 0,000802161 | 0,001609752 |
| FXR2     | -0,386425228 | 5,718428938 | 0,000802813 | 0,001610587 |
| ABCC10   | 0,491726804  | 5,315650487 | 0,000804289 | 0,001613072 |
| ZC3H14   | -0,312819112 | 6,076256504 | 0,000804532 | 0,001613085 |
| FAM198B  | -0,8141348   | 5,743160671 | 0,000804964 | 0,001613478 |
| UBAP2L   | 0,389398566  | 7,962942265 | 0,000808429 | 0,001619947 |
| ZNF551   | 0,566823038  | 3,520662611 | 0,000808711 | 0,001620034 |
| TUBA1A   | -0,555683623 | 8,965270554 | 0,000809015 | 0,001620169 |
| CDKN2C   | 0,778011584  | 4,501766596 | 0,000817206 | 0,001636091 |
| METTL6   | 0,37131721   | 4,186379173 | 0,000826189 | 0,00165359  |
| NPEPPS   | 0,349496927  | 7,336641871 | 0,000829632 | 0,001659994 |
| INO80E   | 0,413181398  | 5,175947328 | 0,000843237 | 0,001686722 |
| FAM122B  | 0,497931354  | 5,755564394 | 0,000848303 | 0,001696357 |
| DCTN2    | 0,36045507   | 7,646392876 | 0,00084926  | 0,001697773 |
| TMEM59   | -0,468108713 | 8,397890771 | 0,000851857 | 0,001702303 |
| C16orf62 | -0,536168713 | 5,906006394 | 0,000852025 | 0,001702303 |
| KIF3A    | -0,387948222 | 4,646986591 | 0,000853692 | 0,001705134 |
| MYCBP2   | -0,56253467  | 6,580625918 | 0,000854099 | 0,001705447 |
| SSR4     | 0,701727171  | 8,384759464 | 0,000854714 | 0,001706175 |
| RAD23B   | 0,384525477  | 8,182168958 | 0,000855422 | 0,001707088 |
| COL5A2   | 1,232157394  | 8,582367928 | 0,000858926 | 0,001713581 |
| GNPAT    | 0,360494585  | 6,398767532 | 0,000871981 | 0,001739117 |
| CEP57    | 0,386552239  | 5,910528904 | 0,000877177 | 0,001748968 |
| ZDHHC4   | 0,477763557  | 6,244979036 | 0,000882827 | 0,001759719 |
| COMMD8   | 0,784935502  | 5,134498214 | 0,000888522 | 0,001770552 |
| DHX9     | 0,313949025  | 8,289174866 | 0,000892356 | 0,001777673 |
| KLHL21   | 0,597493145  | 6,551079238 | 0,000905916 | 0,001804159 |
| DHCR7    | 0,893917522  | 7,55140611  | 0,000906362 | 0,00180452  |
| FUBP1    | 0,393094631  | 6,711125851 | 0,000908066 | 0,001807385 |
| CSDA     | 0,631231568  | 8,767340648 | 0,000913586 | 0,001817841 |
| PMPCA    | 0,420116558  | 6,140924357 | 0,000916055 | 0,001822015 |
| CINP     | 0,521707063  | 5,186475671 | 0,000916218 | 0,001822015 |
| KIAA0020 | 0,570416649  | 5,615218358 | 0,000919169 | 0,00182735  |
| HNRNPR   | 0,302960421  | 7,602190624 | 0,00091956  | 0,001827595 |
| TRO      | 1,08949491   | 3,948924572 | 0,000923823 | 0,001835533 |
| UGCG     | -0,548537046 | 5,042790233 | 0,000940365 | 0,001867855 |
| MIA3     | -0,343884117 | 6,597371226 | 0,000941444 | 0,001869455 |
| RPRD1B   | 0,352778208  | 6,062348461 | 0,000945235 | 0,001876436 |
| LASP1    | -0,368928564 | 8,364608861 | 0,000947838 | 0,001881056 |
| SUPT6H   | -0,416660074 | 7,394731892 | 0,000950789 | 0,001886363 |
| SPOPL    | -0,332447655 | 5,477639408 | 0,00095436  | 0,001892896 |
| PIGN     | 0,570571002  | 5,746414195 | 0,000955406 | 0,001894422 |
| TMX2     | 0,349541665  | 7,313434687 | 0,000955781 | 0,001894615 |
| CDC25B   | 0,666834066  | 7,282395061 | 0,000956756 | 0,001895995 |
| ALKBH8   | -0,390422717 | 3,485414249 | 0,000964546 | 0,001910877 |
| EIF4A1   | 0,381292763  | 9,9954945   | 0,000967505 | 0,001916182 |
| LEPREL2  | 0,95300629   | 5,491704218 | 0,000968148 | 0,001916899 |
| GRIPAP1  | -0,339433571 | 5,829594635 | 0,00096994  | 0,001919889 |



|           |              |             |             |             |
|-----------|--------------|-------------|-------------|-------------|
| GUSB      | -0,405059892 | 6,767106438 | 0,000979363 | 0,001937682 |
| C14orf169 | 0,405792789  | 4,348482387 | 0,000979497 | 0,001937682 |
| HNRNPA2B1 | 0,34270238   | 9,788199417 | 0,000982451 | 0,001942962 |
| ZNF511    | 0,6358278    | 5,175179686 | 0,000983527 | 0,001944525 |
| C6orf106  | -0,349284672 | 7,847356757 | 0,000984742 | 0,001946363 |
| TBC1D10B  | 0,360783693  | 6,557627297 | 0,000986586 | 0,001949443 |
| BICD2     | 0,788500136  | 7,090191215 | 0,000988401 | 0,001952465 |
| ZNF77     | 0,593379757  | 2,916972273 | 0,000989368 | 0,001953808 |
| MLLT1     | -0,429335143 | 6,595878808 | 0,000993912 | 0,001962214 |
| DCAF12    | 0,536176416  | 7,023185044 | 0,000995431 | 0,001964643 |
| TRIM25    | -0,41902659  | 6,338874934 | 0,000998039 | 0,001969222 |
| NCL       | 0,438077858  | 9,827445293 | 0,00099849  | 0,001969541 |
| FLT3LG    | -0,550193587 | 2,950003137 | 0,000999165 | 0,001970302 |
| RPL13A    | 0,573731223  | 11,41134166 | 0,001000085 | 0,001971547 |
| PHF23     | 0,351399927  | 5,605721232 | 0,001002014 | 0,001974778 |
| KAT5      | -0,301737654 | 5,980838546 | 0,001003384 | 0,001976906 |
| EPN2      | -0,449680153 | 5,985713792 | 0,001006918 | 0,001983297 |
| TTC7B     | -0,521846729 | 4,971948584 | 0,00100943  | 0,001987671 |
| AARS2     | 0,483283381  | 5,098525272 | 0,001022435 | 0,00201244  |
| POLA1     | 0,545435957  | 5,193153316 | 0,001022599 | 0,00201244  |
| NAF1      | -0,313597143 | 3,567830861 | 0,001028081 | 0,002022644 |
| TMEM208   | 0,542399455  | 5,642833709 | 0,001029499 | 0,00202485  |
| WIPI2     | 0,328527442  | 6,858938045 | 0,00104231  | 0,002049455 |
| PGP       | 0,52845487   | 4,700781323 | 0,001058184 | 0,002080069 |
| ANP32B    | 0,47253781   | 8,037451193 | 0,001060572 | 0,002084162 |
| PTPN2     | 0,4323106    | 5,970541246 | 0,001066301 | 0,002094816 |
| FUT11     | -0,474706122 | 4,088572227 | 0,001071556 | 0,002104534 |
| PIGF      | 0,555624098  | 4,945398788 | 0,001086882 | 0,002134019 |
| POLR3C    | 0,363703201  | 5,404631746 | 0,001092147 | 0,002143739 |
| CCDC43    | 0,405682795  | 5,194791208 | 0,001098011 | 0,002154585 |
| RPS27A    | 0,538302609  | 10,27175478 | 0,001098304 | 0,002154585 |
| CWF19L1   | 0,460126221  | 5,529291776 | 0,001106955 | 0,00217093  |
| GOLGA7    | 0,643278778  | 6,713648436 | 0,001107912 | 0,002172184 |
| PRKAR2B   | -0,823662362 | 4,037277909 | 0,001112178 | 0,002179614 |
| NOMO1     | 0,502674993  | 7,296562202 | 0,001112342 | 0,002179614 |
| LBR       | 0,54815655   | 6,791778752 | 0,00111997  | 0,002193931 |
| NAB1      | 0,513985567  | 6,534624238 | 0,001120886 | 0,002195095 |
| EEFSEC    | 0,428114215  | 5,204759531 | 0,001126163 | 0,002204797 |
| ETFB      | 0,815654208  | 6,840237736 | 0,001127868 | 0,002207501 |
| CCNI      | -0,394805327 | 8,38633457  | 0,001129044 | 0,002209168 |
| GPN3      | 0,452462916  | 5,36483806  | 0,001137609 | 0,002225289 |
| PIK3CA    | 0,70438392   | 5,980431568 | 0,001142502 | 0,002233873 |
| TEAD3     | 0,520015487  | 6,118597394 | 0,001142653 | 0,002233873 |
| FIP1L1    | 0,456230366  | 5,976192212 | 0,001153307 | 0,002254056 |
| EXOC2     | -0,368697211 | 5,58622414  | 0,00116342  | 0,00227317  |
| CPT2      | -0,331600801 | 5,323881898 | 0,001164708 | 0,002275034 |
| IMPACT    | 0,560665756  | 6,290364421 | 0,001166893 | 0,002278649 |
| DPY19L3   | -0,452189406 | 4,245967273 | 0,001167535 | 0,00227925  |
| CDK6      | 1,075660344  | 6,85130099  | 0,001175298 | 0,002293398 |
| UFM1      | -0,363172455 | 6,666523106 | 0,001175455 | 0,002293398 |

|          |              |             |             |             |
|----------|--------------|-------------|-------------|-------------|
| RPL6     | 0,513570728  | 10,31480898 | 0,001181547 | 0,002304624 |
| OAT      | 0,690198914  | 7,39615037  | 0,001184517 | 0,002309757 |
| EPCAM    | 0,953080883  | 8,374154883 | 0,001199038 | 0,002337404 |
| ITGB3BP  | 0,590526965  | 4,332366898 | 0,001205143 | 0,002348633 |
| ZNF800   | -0,334934959 | 4,844053325 | 0,001206495 | 0,002350597 |
| CLIP1    | -0,410754574 | 6,899034544 | 0,001211501 | 0,002359675 |
| RPL10A   | 0,553906136  | 10,01164097 | 0,001213551 | 0,002362995 |
| ITPR3    | -0,620351371 | 7,849261176 | 0,001235704 | 0,002405442 |
| SLC41A2  | -0,638110074 | 3,828832805 | 0,001236879 | 0,002407043 |
| GPSM1    | -0,627763469 | 4,275938713 | 0,001240583 | 0,002413562 |
| ZNF445   | -0,415605686 | 4,922837972 | 0,001243434 | 0,002418419 |
| SEL1L    | -0,413288574 | 7,630585395 | 0,001243941 | 0,002418714 |
| EFNB2    | -0,726705748 | 6,531534272 | 0,00125435  | 0,002438258 |
| TINF2    | -0,384445727 | 6,496409083 | 0,001255701 | 0,002440189 |
| PLBD1    | -0,799100005 | 6,543827769 | 0,001258046 | 0,00244405  |
| SCAMP3   | 0,379028892  | 6,775514561 | 0,001258566 | 0,002444364 |
| KIAA0100 | -0,411014944 | 8,013419449 | 0,001259374 | 0,002445236 |
| CBFB     | 0,402507051  | 6,553532817 | 0,001280736 | 0,002486006 |
| STAM2    | -0,323025156 | 5,758475325 | 0,001284497 | 0,002492596 |
| USP8     | -0,292493312 | 6,285369071 | 0,001291973 | 0,002506392 |
| NOL7     | 0,415769255  | 5,84670223  | 0,001296849 | 0,002515135 |
| CSK      | 0,399656754  | 6,951834682 | 0,001303855 | 0,002528004 |
| HUS1     | 0,413242655  | 4,765270389 | 0,001305654 | 0,002530772 |
| DCAF11   | -0,330399152 | 6,774347055 | 0,001308058 | 0,00253471  |
| CEBPZ    | 0,366994776  | 6,74741762  | 0,001311309 | 0,002540289 |
| DHX29    | -0,388179751 | 5,521024858 | 0,001314615 | 0,00254597  |
| FAM40A   | -0,361460093 | 5,219474102 | 0,001332005 | 0,002578915 |
| ZNF669   | 0,377640325  | 3,391543574 | 0,001332895 | 0,002579906 |
| EMD      | 0,362428464  | 6,410480908 | 0,001333667 | 0,002580667 |
| ZNF680   | 0,691742255  | 4,160951258 | 0,001338354 | 0,002589003 |
| GIPC1    | 0,613706013  | 7,637722923 | 0,001341774 | 0,002594882 |
| ATHL1    | 1,025710854  | 5,38251016  | 0,001344078 | 0,002598601 |
| KLC1     | -0,352344299 | 6,669520264 | 0,001348821 | 0,002607032 |
| RPL37A   | 0,547599642  | 9,732299562 | 0,001349203 | 0,002607032 |
| RNF8     | 0,367775855  | 5,094642161 | 0,001349591 | 0,002607044 |
| RFX3     | -0,581338253 | 2,349502935 | 0,001351227 | 0,002609463 |
| NDUFA1   | 0,536884142  | 6,740075378 | 0,001357187 | 0,002620232 |
| GPR125   | 0,594637768  | 5,641655454 | 0,001359095 | 0,002623172 |
| FABP5    | 1,601463029  | 9,301833789 | 0,001360384 | 0,002624918 |
| ZNF543   | 0,413965941  | 3,675780137 | 0,00136507  | 0,002632502 |
| TRIM14   | -0,505517861 | 6,121777522 | 0,001365087 | 0,002632502 |
| CCDC91   | 0,702871563  | 5,676589039 | 0,001370439 | 0,002642076 |
| PTPRS    | 0,73998014   | 7,166187577 | 0,001376047 | 0,002651887 |
| ACAT2    | 0,708818462  | 6,309106553 | 0,001376306 | 0,002651887 |
| AHCYL1   | -0,329499714 | 7,6009629   | 0,001381561 | 0,002661261 |
| IL7      | -0,721131096 | 2,259366995 | 0,00139014  | 0,002677031 |
| TSC1     | -0,371689504 | 5,387293817 | 0,001396421 | 0,002688366 |
| SPPL2B   | 0,444805077  | 5,872508906 | 0,001403032 | 0,002700331 |
| RRBP1    | -0,534926525 | 8,272649501 | 0,001408351 | 0,002709805 |
| LOXL2    | 1,190791827  | 6,376090583 | 0,001412299 | 0,002716633 |

|          |              |             |             |             |
|----------|--------------|-------------|-------------|-------------|
| DHX33    | 0,571572286  | 4,637033802 | 0,001413612 | 0,002718393 |
| THRAP3   | -0,297191876 | 7,565663003 | 0,001422845 | 0,002735377 |
| ERF      | 0,528196687  | 6,209020889 | 0,001426796 | 0,002742199 |
| DAPK3    | -0,426148799 | 5,722505953 | 0,00143225  | 0,002751906 |
| HSF2     | 0,558167155  | 4,77943584  | 0,001434788 | 0,002756005 |
| IQCE     | -0,481437872 | 5,06171519  | 0,001435621 | 0,002756276 |
| PMPCB    | 0,390471075  | 6,505187567 | 0,001435737 | 0,002756276 |
| UBE2W    | 0,523726394  | 5,96361037  | 0,001437726 | 0,002759318 |
| TEX2     | -0,413876526 | 6,382952987 | 0,001439391 | 0,002761735 |
| SEC16A   | -0,441519706 | 7,208992844 | 0,001454055 | 0,002789087 |
| MBOAT1   | 0,758445144  | 5,561605894 | 0,001458915 | 0,00279762  |
| BAHCC1   | -0,625436531 | 4,631032076 | 0,001460234 | 0,002799363 |
| SYF2     | -0,266665088 | 5,776986277 | 0,00147068  | 0,002818596 |
| MKL1     | -0,401978174 | 6,030367094 | 0,001472384 | 0,00282107  |
| GPX8     | 0,708511808  | 5,493557574 | 0,001483681 | 0,002841916 |
| SLAIN2   | -0,383209075 | 6,519225646 | 0,00149904  | 0,002870529 |
| RBM10    | 0,309680506  | 6,331978817 | 0,001501557 | 0,002874541 |
| DHTKD1   | 0,498986138  | 5,777901787 | 0,001512205 | 0,002894114 |
| AIDA     | -0,313763097 | 7,188793828 | 0,001513938 | 0,002896616 |
| TUBGCP4  | 0,418395582  | 4,549523063 | 0,001521465 | 0,002910202 |
| SELT     | 0,688999908  | 8,199901879 | 0,001522019 | 0,002910444 |
| NOLC1    | 0,450136785  | 7,475300624 | 0,001528662 | 0,002922329 |
| FAM54B   | -0,357684993 | 5,702137791 | 0,001530811 | 0,002925616 |
| SQLE     | 0,669337086  | 7,208480142 | 0,001531337 | 0,002925801 |
| MBOAT2   | 0,805964899  | 5,748499418 | 0,001533731 | 0,002929556 |
| DNASE1L1 | -0,449883136 | 5,468661642 | 0,001534946 | 0,002931054 |
| RBM6     | -0,416262631 | 5,844894286 | 0,001536507 | 0,002933214 |
| CENPV    | 1,067058068  | 3,761381594 | 0,001540996 | 0,00294096  |
| KIAA1737 | -0,383449108 | 5,430574122 | 0,001546186 | 0,00295004  |
| SPAG7    | -0,32970352  | 5,572383915 | 0,001560837 | 0,00297716  |
| OVCA2    | 0,439570704  | 3,257494836 | 0,001561967 | 0,002978483 |
| TACSTD2  | 1,233718867  | 9,382946621 | 0,001567993 | 0,002989138 |
| ACBD5    | -0,340256751 | 5,554430812 | 0,001569506 | 0,002991185 |
| WDR1     | -0,347482381 | 8,663468041 | 0,001579782 | 0,003009929 |
| NDUFS5   | 0,542521481  | 7,312643305 | 0,001580768 | 0,003010965 |
| GUF1     | 0,518897079  | 5,277711947 | 0,001582185 | 0,003012823 |
| FAM46C   | -0,914107019 | 6,050331807 | 0,001598221 | 0,0030425   |
| SSFA2    | -0,535650919 | 7,888746094 | 0,001598662 | 0,0030425   |
| ASXL1    | -0,353804885 | 6,486321643 | 0,00160853  | 0,003060425 |
| WDR54    | 0,6394088    | 4,9909107   | 0,001611634 | 0,003065476 |
| PGLS     | 0,463615239  | 6,008930679 | 0,00162832  | 0,00309635  |
| PNN      | 0,471002016  | 6,789921902 | 0,00163093  | 0,00310045  |
| MRPL50   | 0,524220248  | 5,129574305 | 0,001639577 | 0,003116018 |
| TRPS1    | 0,851667626  | 5,307973995 | 0,001643194 | 0,003122023 |
| KIAA0391 | 0,512891355  | 6,777837776 | 0,001647703 | 0,003129527 |
| CS       | 0,330701154  | 8,216949317 | 0,001648061 | 0,003129527 |
| EEA1     | -0,40506278  | 5,599174407 | 0,001656947 | 0,003145523 |
| PPIB     | 0,450884325  | 9,215444917 | 0,001662119 | 0,003154465 |
| TRIM65   | 0,418536656  | 5,437020019 | 0,001666289 | 0,003160946 |
| LLPH     | 0,61212069   | 5,989913315 | 0,001666461 | 0,003160946 |

|           |              |             |             |             |
|-----------|--------------|-------------|-------------|-------------|
| NENF      | 0,611943513  | 6,542453293 | 0,001679492 | 0,003184777 |
| AP2B1     | -0,469866787 | 8,415773698 | 0,00168202  | 0,003188684 |
| HSPA1A    | 0,705341422  | 8,87235322  | 0,001687184 | 0,003197585 |
| PLEKHM2   | -0,369641533 | 6,869255479 | 0,001692431 | 0,003206638 |
| HSPH1     | 0,524360553  | 7,653778965 | 0,001693405 | 0,003207592 |
| AMBRA1    | -0,39472945  | 5,650614034 | 0,001697088 | 0,003213675 |
| RPL7A     | 0,55383456   | 10,9016764  | 0,00172     | 0,003256157 |
| RAB43     | -0,444385108 | 6,643782022 | 0,001722855 | 0,003260657 |
| PDIA3     | 0,41466388   | 9,817432409 | 0,001727146 | 0,003267872 |
| GTF3A     | 0,601861506  | 7,311919331 | 0,00172767  | 0,003267956 |
| GANAB     | 0,342306094  | 9,617332746 | 0,001737239 | 0,003285146 |
| ITGA5     | -0,702968863 | 7,807018212 | 0,00174233  | 0,003293859 |
| GTPBP1    | -0,391502424 | 6,588238985 | 0,001745739 | 0,003299388 |
| HINT1     | 0,578836701  | 8,105573353 | 0,001749249 | 0,003305106 |
| AFG3L2    | 0,429781177  | 6,733186559 | 0,00175206  | 0,003308738 |
| WBP4      | -0,37452701  | 4,217403053 | 0,001752142 | 0,003308738 |
| TP53INP1  | -0,607777603 | 6,378188155 | 0,001755113 | 0,003313431 |
| TUBB2A    | 0,845911511  | 5,612499328 | 0,00175857  | 0,003319039 |
| UBE2F     | 0,423922309  | 5,795081933 | 0,001763093 | 0,003326655 |
| SNTB2     | -0,425028524 | 5,955309294 | 0,001765194 | 0,003329699 |
| ZNF532    | 0,571405948  | 6,815173083 | 0,00176802  | 0,003334107 |
| HSPA5     | 0,396780034  | 10,16497181 | 0,001771055 | 0,003338907 |
| ZNF526    | 0,371332074  | 4,555462438 | 0,001782096 | 0,003358793 |
| TBC1D23   | 0,477955672  | 6,22308592  | 0,001783313 | 0,003360159 |
| MANEA     | 0,474153382  | 5,289758355 | 0,001796613 | 0,003384283 |
| DEXI      | -0,317794515 | 5,189281952 | 0,001823408 | 0,003433809 |
| ERMP1     | 0,778561303  | 7,045791961 | 0,001835061 | 0,003454798 |
| CDC5L     | 0,351383889  | 6,270504978 | 0,001837304 | 0,003458066 |
| GOSR1     | 0,424426689  | 6,887078798 | 0,001841479 | 0,003464968 |
| SEMA4C    | 0,658913189  | 6,359534097 | 0,001850619 | 0,003481206 |
| TBCK      | -0,393471009 | 4,570204949 | 0,001854233 | 0,003487042 |
| GLI2      | 1,418135706  | 4,521755536 | 0,001856345 | 0,003489414 |
| NEK11     | -0,615283384 | 3,295190771 | 0,001856518 | 0,003489414 |
| SDHB      | 0,426764527  | 6,790959698 | 0,00186346  | 0,003501147 |
| ANKRD9    | 0,682655942  | 2,763033381 | 0,001863787 | 0,003501147 |
| YWHAE     | 0,390963315  | 9,727849812 | 0,001878281 | 0,003527403 |
| OPN3      | -0,71581603  | 5,095371418 | 0,00187918  | 0,003528119 |
| OGFR      | -0,425011543 | 5,755815042 | 0,00189067  | 0,003548715 |
| BMP2K     | -0,513529257 | 4,510396194 | 0,001893952 | 0,003553895 |
| THUMPD3   | 0,309317865  | 5,772049226 | 0,001895889 | 0,003556552 |
| C20orf112 | -0,579275937 | 5,028005166 | 0,001906595 | 0,003575653 |
| MTMR2     | 0,40479783   | 6,367650753 | 0,001915477 | 0,003591322 |
| STAM      | -0,371770928 | 5,350786043 | 0,001917593 | 0,003594301 |
| MAP3K6    | -0,604914879 | 5,849218811 | 0,00193025  | 0,00361703  |
| CDH11     | -0,804580018 | 6,889325086 | 0,001930971 | 0,003617387 |
| EIF3K     | 0,563872878  | 8,039750818 | 0,001943152 | 0,003639207 |
| OSBPL10   | -0,466643836 | 4,733356748 | 0,001961356 | 0,003672292 |
| AP1G1     | -0,311830918 | 7,167148822 | 0,001972244 | 0,003691444 |
| STARD3NL  | -0,575770682 | 5,771168412 | 0,001972668 | 0,003691444 |
| C16orf52  | -0,38744752  | 4,236722892 | 0,001976438 | 0,003697484 |

|           |              |             |             |             |
|-----------|--------------|-------------|-------------|-------------|
| COX4I1    | 0,589648752  | 8,480671183 | 0,001983687 | 0,003710028 |
| LSP1      | -0,768532338 | 6,556078594 | 0,001990973 | 0,003722634 |
| DBNDD2    | -0,542342413 | 5,347316876 | 0,001993173 | 0,003725726 |
| ATG4B     | 0,372065601  | 5,969617215 | 0,002004774 | 0,003746384 |
| ZNF670    | 0,567321318  | 2,63985638  | 0,00200959  | 0,003754355 |
| CORO1A    | -0,699151241 | 6,298237034 | 0,002014835 | 0,003763122 |
| RBX1      | 0,599931542  | 6,561473957 | 0,002022682 | 0,003776744 |
| TCF25     | -0,33000672  | 6,815900565 | 0,002023763 | 0,003777728 |
| GOLGA8B   | 0,992836388  | 5,79401068  | 0,002027643 | 0,003783936 |
| ST8SIA4   | -0,691561948 | 5,144646549 | 0,002029926 | 0,003787159 |
| TMEM141   | 0,692297     | 6,285688767 | 0,002030912 | 0,003787962 |
| QRSL1     | 0,39922762   | 5,015445342 | 0,002037125 | 0,003798511 |
| SRP54     | 0,382348878  | 6,531422002 | 0,002040128 | 0,003803071 |
| MRPL39    | 0,49105829   | 4,848476632 | 0,002078838 | 0,00387339  |
| MRPL49    | 0,491370017  | 6,95824787  | 0,002078986 | 0,00387339  |
| CSAD      | 0,661544062  | 4,226355968 | 0,00208027  | 0,003874722 |
| HEATR5A   | -0,477090056 | 5,587629986 | 0,002082281 | 0,003877411 |
| NDUFS1    | 0,358431521  | 6,715238968 | 0,00208953  | 0,003889846 |
| IRS2      | -0,733062981 | 5,653319376 | 0,002100678 | 0,003909531 |
| MAPK7     | -0,399838001 | 4,576953893 | 0,002114581 | 0,003934331 |
| PKP4      | 0,431798071  | 7,037954472 | 0,002119613 | 0,003942619 |
| TPMT      | 0,424517633  | 5,977674516 | 0,00214562  | 0,003989905 |
| USP24     | -0,38237784  | 6,272928722 | 0,002159046 | 0,004013778 |
| ARL8A     | -0,286795489 | 6,172822301 | 0,002178125 | 0,004048143 |
| SLC5A3    | 0,531003637  | 5,803786924 | 0,002179007 | 0,004048678 |
| ZBTB11    | 0,359290344  | 5,708571865 | 0,00219404  | 0,004075303 |
| PSMB6     | 0,385456756  | 7,088270415 | 0,002194532 | 0,004075303 |
| PRR13     | -0,320090438 | 7,32399229  | 0,002205002 | 0,004093631 |
| AARS      | 0,470831235  | 8,01222252  | 0,002211936 | 0,004105388 |
| RNF149    | -0,375256294 | 6,640467729 | 0,002218257 | 0,004115999 |
| ODC1      | 1,152232738  | 9,113050936 | 0,002221688 | 0,004121244 |
| LOC650623 | -0,571095654 | 2,636791407 | 0,002223346 | 0,004123198 |
| EDIL3     | -0,871736827 | 5,230287706 | 0,002226078 | 0,004127141 |
| BTF3      | 0,413713986  | 9,062921735 | 0,00223206  | 0,004137108 |
| ARHGEF1   | -0,393594518 | 6,787577783 | 0,002241817 | 0,004154063 |
| MXRA5     | 1,136702246  | 8,074586806 | 0,002243475 | 0,004156006 |
| XIAP      | -0,258985043 | 6,607382934 | 0,002246362 | 0,004160223 |
| TPD52L2   | 0,419455057  | 7,691473986 | 0,002254792 | 0,004174703 |
| WIZ       | 0,500236445  | 6,281115036 | 0,00226142  | 0,004185837 |
| RBM22     | -0,267548458 | 5,896357209 | 0,002276856 | 0,004213265 |
| FBXL4     | 0,36757825   | 4,539092661 | 0,002295914 | 0,004247379 |
| ATP5L     | 0,527290151  | 7,807106113 | 0,002304448 | 0,00426201  |
| FKBP11    | 0,795117223  | 5,957949461 | 0,002313649 | 0,004277867 |
| BRAF      | 0,516781667  | 4,099267638 | 0,002318468 | 0,004285614 |
| NFYA      | 0,389311683  | 5,880332178 | 0,002325889 | 0,004298167 |
| RTN4      | -0,319977615 | 8,665630264 | 0,002330051 | 0,004304691 |
| UQCR10    | 0,484300259  | 6,722354394 | 0,002350538 | 0,004341364 |
| F8A1      | 0,471847494  | 4,441151657 | 0,002355498 | 0,004349347 |
| FBXO8     | -0,396190577 | 4,702646196 | 0,002363893 | 0,004363668 |
| UTP23     | 0,334189664  | 5,254179611 | 0,002370829 | 0,004375287 |

|           |              |             |             |             |
|-----------|--------------|-------------|-------------|-------------|
| GABPB2    | 0,584467351  | 3,164725211 | 0,002375984 | 0,004383614 |
| EIF1AX    | 0,535511715  | 7,861537132 | 0,002384327 | 0,004397817 |
| NAV1      | 1,014955612  | 7,116757835 | 0,002388078 | 0,004403543 |
| UBA52     | 0,434368917  | 9,452558861 | 0,002408247 | 0,004439535 |
| ATP1A1    | -0,442996282 | 10,33653136 | 0,002425639 | 0,004470386 |
| RRP1B     | 0,443450977  | 6,149292582 | 0,002427957 | 0,00447345  |
| NFYB      | -0,310405465 | 5,502479714 | 0,002440206 | 0,004494805 |
| KCTD20    | -0,33645232  | 6,890309242 | 0,002452887 | 0,004516942 |
| USP37     | 0,386883221  | 5,087748245 | 0,002458688 | 0,004526402 |
| ZFAND2A   | 0,668621485  | 4,760963567 | 0,002460898 | 0,004529247 |
| NARG2     | 0,365061665  | 6,023582911 | 0,002463989 | 0,004533714 |
| BCLAF1    | -0,274380285 | 7,504054258 | 0,002475158 | 0,004553035 |
| ATP5I     | 0,595714905  | 6,371206146 | 0,002479668 | 0,004560101 |
| ITM2B     | -0,473613827 | 9,928360616 | 0,002492773 | 0,004582965 |
| MEX3C     | 0,381453723  | 6,092434297 | 0,002507539 | 0,004608871 |
| C10orf137 | 0,392685896  | 4,409679775 | 0,002516747 | 0,004624548 |
| OXSR1     | -0,330500373 | 6,155287564 | 0,002530131 | 0,004647736 |
| EXOC3     | 0,42544013   | 6,685947719 | 0,002530729 | 0,004647736 |
| SERP1     | 0,492973505  | 8,776431815 | 0,002557927 | 0,004696419 |
| MFSD6     | -0,487093027 | 6,612147311 | 0,002575078 | 0,004726637 |
| ZFAND1    | 0,483727077  | 5,719723035 | 0,002577072 | 0,004728285 |
| FBXO21    | -0,338896005 | 6,314178483 | 0,002577362 | 0,004728285 |
| TRIP11    | -0,377174059 | 5,443592099 | 0,002579914 | 0,004731693 |
| TGFB2     | -0,967966271 | 4,845273534 | 0,002580968 | 0,004732352 |
| OS9       | -0,32010387  | 8,894554146 | 0,002589404 | 0,004746544 |
| BMPR1A    | -0,366196067 | 5,480846316 | 0,002592607 | 0,004751139 |
| TDP2      | 0,604508916  | 6,470626248 | 0,002608806 | 0,004779541 |
| DAXX      | 0,303763204  | 6,632927397 | 0,002617223 | 0,004793673 |
| TMLHE     | 0,515723401  | 4,246021815 | 0,00262498  | 0,004806589 |
| NOP14     | 0,372869666  | 6,245747531 | 0,002631039 | 0,00481639  |
| KLHL15    | -0,475466653 | 4,290679917 | 0,002642086 | 0,004834242 |
| NR2F6     | 0,567786576  | 5,629209127 | 0,002642209 | 0,004834242 |
| EGFR      | 1,364034713  | 7,710236756 | 0,002662172 | 0,00486946  |
| FAM118A   | 0,457101695  | 4,775036975 | 0,002664109 | 0,004871698 |
| PASK      | 0,522700383  | 4,133779444 | 0,002683661 | 0,004905711 |
| TMEM165   | 0,758160066  | 7,526146757 | 0,002684148 | 0,004905711 |
| PCID2     | 0,609372806  | 5,910831713 | 0,002703742 | 0,004940197 |
| C5orf43   | 0,338093183  | 6,239711299 | 0,002708325 | 0,004947245 |
| CDK14     | -0,644249441 | 5,210806225 | 0,002714196 | 0,004956643 |
| SLC44A3   | -0,69708473  | 3,98342418  | 0,002717615 | 0,004961557 |
| P2RX4     | -0,432754124 | 5,401424186 | 0,002726146 | 0,00497571  |
| ESRRA     | 0,498760758  | 6,099791565 | 0,002726826 | 0,00497571  |
| CRTC1     | -0,53501076  | 4,200558848 | 0,002739713 | 0,004997888 |
| ANKIB1    | 0,459016814  | 6,576230253 | 0,002762364 | 0,00503786  |
| NDUFS2    | 0,442102709  | 7,17527552  | 0,002772065 | 0,005054201 |
| CXorf56   | 0,422158751  | 4,270488055 | 0,002785741 | 0,005076599 |
| HNRNPK    | 0,199764891  | 9,729179227 | 0,002785839 | 0,005076599 |
| CXCL9     | 1,353370122  | 6,994836446 | 0,00278813  | 0,005079417 |
| LONP1     | 0,467329746  | 6,942742092 | 0,002792773 | 0,005086517 |
| GALNS     | 0,536711109  | 5,622938555 | 0,002803303 | 0,005104332 |

|           |              |             |             |             |
|-----------|--------------|-------------|-------------|-------------|
| IFNGR1    | -0,569361644 | 7,819737725 | 0,002830641 | 0,005152734 |
| HAGH      | -0,457942384 | 5,211558081 | 0,002839029 | 0,005166624 |
| UBE2K     | 0,378254491  | 7,049901804 | 0,002865065 | 0,005212614 |
| PHF3      | -0,407561451 | 6,590993596 | 0,002885132 | 0,005247363 |
| TNC       | 1,435098424  | 9,464509954 | 0,002885703 | 0,005247363 |
| RCN3      | 1,051956649  | 5,651671073 | 0,002889258 | 0,005252426 |
| MRPL46    | 0,433642026  | 4,678869301 | 0,002896858 | 0,005264839 |
| APPL2     | 0,446501509  | 6,082289788 | 0,002898156 | 0,005265794 |
| COPZ1     | 0,32021004   | 8,078592552 | 0,00289936  | 0,005266285 |
| TBC1D3    | 0,446119369  | 4,371093103 | 0,002899971 | 0,005266285 |
| PGGT1B    | -0,307246807 | 4,474815405 | 0,002906185 | 0,005276165 |
| SUPT7L    | 0,247828271  | 6,098997644 | 0,002919927 | 0,005299702 |
| RSL24D1   | 0,602001682  | 7,427507656 | 0,002922681 | 0,00530329  |
| ACTB      | -0,358598996 | 12,85453661 | 0,002937216 | 0,005328245 |
| PLEKHA5   | 0,521915281  | 6,084399517 | 0,002938199 | 0,005328611 |
| SPEN      | -0,463870829 | 6,785089755 | 0,002950364 | 0,00534925  |
| ZBTB2     | -0,257349811 | 4,863443471 | 0,002951313 | 0,00534955  |
| STX16     | 0,368130237  | 6,654646757 | 0,002952825 | 0,005350866 |
| COMMD1    | 0,556917197  | 5,191232269 | 0,002961929 | 0,005365939 |
| TTL       | 0,343359135  | 6,369590558 | 0,002970705 | 0,005380409 |
| UBB       | -0,439370179 | 10,00499886 | 0,002985042 | 0,005404938 |
| YTHDF1    | 0,315444485  | 6,627509726 | 0,002988061 | 0,005408969 |
| MTF2      | 0,364585674  | 5,038410801 | 0,002998338 | 0,005424864 |
| FOSL2     | -0,512238498 | 7,685341965 | 0,002998433 | 0,005424864 |
| OPTN      | -0,443020453 | 6,81596404  | 0,003004745 | 0,005434843 |
| MGAT2     | 0,423113421  | 6,27806785  | 0,003006268 | 0,005436156 |
| PIK3CD    | -0,579105535 | 5,169791021 | 0,003046971 | 0,00550751  |
| SETD6     | 0,422087653  | 4,239436658 | 0,003047343 | 0,00550751  |
| NRD1      | 0,310227753  | 7,728760936 | 0,003051394 | 0,005513369 |
| MED8      | 0,376620826  | 5,811907666 | 0,003053785 | 0,005516228 |
| TMEM60    | 0,419612607  | 4,449927975 | 0,003078472 | 0,005559348 |
| RPL23AP82 | 0,360040536  | 4,560029781 | 0,003098866 | 0,005594696 |
| PDCD11    | 0,47395146   | 6,311546702 | 0,003108519 | 0,005610637 |
| USP16     | -0,32075194  | 5,854771556 | 0,003129242 | 0,005646548 |
| SMARCC1   | 0,418979917  | 7,52267515  | 0,003142321 | 0,005668405 |
| LYPLAL1   | 0,67016831   | 4,938870946 | 0,003143018 | 0,005668405 |
| KIAA0664  | 0,495249827  | 6,812234584 | 0,003156282 | 0,005690821 |
| NBEA      | -0,817912051 | 3,54542718  | 0,003161634 | 0,005698964 |
| KIAA1009  | -0,453825925 | 3,344925447 | 0,003164255 | 0,005702182 |
| GPNMB     | 1,143621015  | 10,67801252 | 0,003170117 | 0,005711235 |
| GNA15     | 0,813246903  | 6,166153745 | 0,003184491 | 0,005735616 |
| ORMDL3    | -0,459865394 | 6,63812122  | 0,003193169 | 0,005749728 |
| TCEA3     | -0,592745686 | 5,162526566 | 0,003207048 | 0,005773195 |
| WARS      | -0,645495392 | 8,73523007  | 0,003226789 | 0,005807198 |
| FAM126B   | -0,357058106 | 4,925831258 | 0,003249671 | 0,005846835 |
| OGFOD1    | 0,278393539  | 6,019155744 | 0,003272629 | 0,005886589 |
| SOLH      | 0,485321032  | 5,73557168  | 0,003278118 | 0,005894907 |
| GRAMD1A   | -0,418648251 | 6,501017596 | 0,003280245 | 0,005897177 |
| MAGEH1    | -0,534835709 | 4,991003666 | 0,003282235 | 0,0058992   |
| ADCK2     | 0,458449598  | 5,870376383 | 0,003290404 | 0,005912323 |

|         |              |             |             |             |
|---------|--------------|-------------|-------------|-------------|
| ENDOG   | 0,488249651  | 3,646433007 | 0,00329681  | 0,005922273 |
| ENAH    | 0,474593703  | 7,929872062 | 0,003307048 | 0,0059391   |
| GTF3C6  | 0,405099263  | 5,742077806 | 0,003344531 | 0,006004834 |
| DDX31   | 0,369586697  | 4,35388496  | 0,003347694 | 0,00600893  |
| UQCR11  | 0,540530926  | 6,763022406 | 0,003353921 | 0,006018522 |
| EIF1B   | -0,375191281 | 5,622037183 | 0,003366116 | 0,006038818 |
| OSBPL1A | -0,463221344 | 5,878936173 | 0,003378323 | 0,006059123 |
| MS4A6A  | -0,735679785 | 6,199739339 | 0,003391635 | 0,006081399 |
| TRERF1  | 0,560538093  | 4,736209432 | 0,003400843 | 0,006096307 |
| LDHB    | 0,682910804  | 9,37057117  | 0,003407824 | 0,006107214 |
| GFPT2   | -0,76028491  | 4,646116326 | 0,003414595 | 0,006117742 |
| MRFAP1  | -0,308893656 | 8,361264261 | 0,003422857 | 0,006130933 |
| CNN3    | -0,650875847 | 8,095363874 | 0,003426462 | 0,006135779 |
| MYBBP1A | 0,498339004  | 6,255610226 | 0,003432511 | 0,006144998 |
| USP32   | -0,327725847 | 6,201906378 | 0,003447724 | 0,006170612 |
| NR1H2   | -0,337296322 | 6,779504997 | 0,003450449 | 0,006173868 |
| BCAS2   | 0,411300362  | 5,502022553 | 0,003465257 | 0,006198738 |
| YIPF6   | 0,45738395   | 5,020880093 | 0,003482326 | 0,006227637 |
| CLK4    | -0,460906864 | 3,825981735 | 0,003485001 | 0,006230787 |
| KLHL20  | -0,325115461 | 4,875868116 | 0,00349429  | 0,006245757 |
| SLC35C2 | 0,320830614  | 6,367561643 | 0,003511957 | 0,006275691 |
| WIBG    | 0,380738927  | 5,38506943  | 0,003539003 | 0,006322364 |
| LSM10   | 0,462853173  | 5,283906507 | 0,003551244 | 0,00634257  |
| C16orf5 | -0,550094741 | 5,272819005 | 0,003571294 | 0,006376709 |
| STAU2   | 0,399508715  | 6,072000692 | 0,003572257 | 0,006376758 |
| ZNF136  | -0,366934939 | 3,882308803 | 0,003574403 | 0,00637892  |
| RPL7    | 0,457940195  | 10,69921072 | 0,003601029 | 0,006424757 |
| ELP2    | 0,438832177  | 6,431794454 | 0,003632428 | 0,006479081 |
| HDDC2   | 0,703166669  | 6,400176813 | 0,003639715 | 0,006489353 |
| STXBP3  | -0,286292096 | 5,575346219 | 0,00364009  | 0,006489353 |
| ZC3H7B  | -0,405316628 | 7,317151473 | 0,003653712 | 0,006511936 |
| RPL11   | -0,392879736 | 9,668602245 | 0,003664539 | 0,006529526 |
| FOXK1   | 0,574162079  | 6,914688738 | 0,003665886 | 0,006530219 |
| EXOSC7  | 0,371107355  | 5,456554967 | 0,003681567 | 0,00655644  |
| TMEM209 | 0,370310803  | 5,626834986 | 0,003706791 | 0,006599637 |
| USP13   | -0,545459979 | 5,479624209 | 0,003712684 | 0,006608402 |
| LRCH4   | -0,388809941 | 5,644816803 | 0,003729219 | 0,006636102 |
| CTR9    | -0,357261476 | 6,217433739 | 0,00373192  | 0,006639176 |
| MIB1    | 0,468324679  | 6,818866765 | 0,003738781 | 0,006649647 |
| KITLG   | -0,600188152 | 6,667202596 | 0,003740013 | 0,006650105 |
| IRF2BP1 | 0,493284073  | 5,184305048 | 0,003752504 | 0,006670574 |
| WDR59   | 0,373259803  | 5,530551924 | 0,00377387  | 0,006706807 |
| CBWD1   | 0,390891319  | 5,014997587 | 0,003783846 | 0,006722784 |
| SYNCRIP | 0,319052095  | 8,189879049 | 0,00379185  | 0,00673525  |
| UXT     | 0,494034379  | 6,307753762 | 0,003829647 | 0,006800615 |
| RPL4    | 0,426629849  | 11,08957454 | 0,003831747 | 0,006802572 |
| VPS35   | 0,317988709  | 7,610138907 | 0,003838265 | 0,006811408 |
| DEDD    | 0,376869938  | 6,101837524 | 0,003838721 | 0,006811408 |
| VAPB    | 0,306646612  | 6,266837643 | 0,003843124 | 0,006817447 |
| GLTSCR2 | -0,42079006  | 7,864833562 | 0,003847912 | 0,006824164 |



|           |              |             |             |             |
|-----------|--------------|-------------|-------------|-------------|
| NPL       | 0,773217472  | 6,146704769 | 0,003851162 | 0,006828153 |
| CEP170    | -0,414368934 | 5,866229833 | 0,003859357 | 0,006840903 |
| MRPS6     | 0,486385717  | 5,809483489 | 0,003861406 | 0,006842757 |
| PIGK      | -0,360666845 | 5,498707408 | 0,003879396 | 0,006872851 |
| UBE3C     | 0,3576603    | 7,404675723 | 0,003893247 | 0,006895598 |
| SLC38A10  | -0,378090329 | 7,226746729 | 0,003899131 | 0,006904225 |
| SDHAF2    | 0,326428319  | 5,739868213 | 0,003903825 | 0,006910744 |
| SHC1      | 0,533590424  | 8,112896562 | 0,003908665 | 0,006917515 |
| XPO6      | 0,461938737  | 7,356694189 | 0,003910445 | 0,006918869 |
| PRKD3     | -0,348388134 | 6,272716024 | 0,003913297 | 0,00692212  |
| CDKAL1    | 0,951070844  | 5,709395131 | 0,003917443 | 0,006925903 |
| HMOX1     | -0,793871023 | 6,769593821 | 0,003917467 | 0,006925903 |
| LOC285359 | 0,441385651  | 1,374064991 | 0,003940514 | 0,006964843 |
| COX10     | 0,333787808  | 4,487883881 | 0,003942282 | 0,006966163 |
| NUP210    | 0,795600427  | 7,039000264 | 0,003956539 | 0,006989544 |
| RAC2      | -0,649235745 | 6,66217751  | 0,004009748 | 0,007081706 |
| C1orf85   | 0,410097823  | 6,489854062 | 0,004020351 | 0,007098595 |
| NDFIP2    | 0,570264602  | 6,571923815 | 0,00406942  | 0,007183374 |
| UBP1      | -0,29976563  | 6,669472873 | 0,004070848 | 0,007184036 |
| ASNA1     | 0,502044626  | 6,847113212 | 0,004087619 | 0,007211765 |
| IVNS1ABP  | 0,490509408  | 8,062541317 | 0,004108115 | 0,007246052 |
| PDIA3P    | 0,36097543   | 5,7770956   | 0,004116682 | 0,007259286 |
| HIF1A     | 0,530347746  | 8,755680584 | 0,00417994  | 0,007368926 |
| NLRP1     | -0,716609107 | 4,927279304 | 0,004181705 | 0,007370134 |
| COX16     | 0,423302997  | 5,933472645 | 0,004188058 | 0,007379423 |
| FAM118B   | -0,392681539 | 4,858992875 | 0,004225288 | 0,0074431   |
| ASL       | -0,491582835 | 5,625185734 | 0,004256999 | 0,007497023 |
| PRKCSH    | 0,362791891  | 8,552254253 | 0,004288552 | 0,007550642 |
| HECTD1    | -0,42589648  | 7,415723967 | 0,004299779 | 0,007568454 |
| ARID5B    | -0,467445794 | 6,756694396 | 0,004303056 | 0,007572267 |
| CPSF3L    | 0,338153553  | 6,552813439 | 0,004326446 | 0,007611464 |
| FAM89B    | 0,436437629  | 6,150807731 | 0,004341753 | 0,007636424 |
| FAM133B   | 0,410474243  | 5,151162359 | 0,004354538 | 0,007656935 |
| WDR13     | -0,322883717 | 6,358726263 | 0,004372382 | 0,00768633  |
| HELB      | 0,544840438  | 1,671416273 | 0,004384909 | 0,007706364 |
| YLPM1     | -0,403478556 | 6,619140707 | 0,00439074  | 0,007714001 |
| ZCCHC14   | -0,402958246 | 5,700947564 | 0,004391517 | 0,007714001 |
| NUDT21    | 0,332113127  | 7,274899148 | 0,004408531 | 0,007741893 |
| SIX5      | 0,474321423  | 4,791069789 | 0,004412685 | 0,007747193 |
| RNF138    | 0,53173316   | 5,74783041  | 0,004425665 | 0,007767982 |
| CCNDBP1   | -0,379691629 | 6,037327007 | 0,004452747 | 0,007813505 |
| ZNF662    | -0,584440755 | 2,820352058 | 0,004477142 | 0,007854291 |
| SLC35B3   | 0,316048878  | 5,112775651 | 0,004481465 | 0,007859854 |
| SQRDL     | -0,542334517 | 6,913578376 | 0,00448297  | 0,007860471 |
| ERCC2     | 0,431370486  | 4,978822577 | 0,004498542 | 0,007885748 |
| HNRNPF    | 0,32939565   | 8,407092662 | 0,004545541 | 0,007966087 |
| GSPT1     | -0,267244179 | 7,851969466 | 0,004554887 | 0,007980415 |
| MLL4      | 0,475132505  | 6,406409718 | 0,004576612 | 0,008016418 |
| YPEL3     | -0,46373852  | 5,400603737 | 0,004649396 | 0,008141815 |
| GPC4      | -0,747504125 | 6,630440983 | 0,004654768 | 0,00814913  |

|           |              |             |             |             |
|-----------|--------------|-------------|-------------|-------------|
| GBA2      | -0,448675985 | 5,752997743 | 0,004663016 | 0,008161475 |
| CDC23     | 0,294021593  | 5,651048161 | 0,004686324 | 0,008200166 |
| NOL8      | 0,375838755  | 5,468303775 | 0,00471245  | 0,008243765 |
| NOP10     | 0,512037718  | 6,788811017 | 0,004718955 | 0,008253028 |
| DNAJC15   | -0,629263173 | 5,205169089 | 0,004723932 | 0,008259614 |
| MTERFD2   | -0,313675853 | 4,286153984 | 0,004741468 | 0,00828815  |
| VEGFB     | -0,330334116 | 6,595109431 | 0,004753325 | 0,008306747 |
| SGTA      | 0,328693781  | 6,684506986 | 0,00475684  | 0,008310758 |
| FDX1L     | 0,428531349  | 3,963604558 | 0,004759282 | 0,008312896 |
| FBLIM1    | 0,547122213  | 6,861072279 | 0,004761013 | 0,00831379  |
| RABGAP1   | -0,351701646 | 6,362182094 | 0,004811199 | 0,008399275 |
| WSB2      | 0,371633983  | 7,487852016 | 0,004838627 | 0,008444995 |
| LTV1      | 0,352721834  | 5,498836684 | 0,004858333 | 0,008477219 |
| USMG5     | 0,564769113  | 5,864426753 | 0,004860125 | 0,008478177 |
| ARFGAP1   | 0,389786778  | 6,41324316  | 0,004864472 | 0,008483092 |
| POLM      | 0,43905064   | 4,555629509 | 0,004865431 | 0,008483092 |
| INTS4     | 0,363448373  | 5,226324338 | 0,004878609 | 0,00850284  |
| APOC1     | -0,895805772 | 7,116437495 | 0,004879753 | 0,00850284  |
| PCDHB14   | 0,843891518  | 3,624885161 | 0,004880498 | 0,00850284  |
| MAP2K4    | -0,326915051 | 5,6330575   | 0,004882463 | 0,00850409  |
| LOC440944 | 0,531208009  | 3,796220525 | 0,004888703 | 0,008512785 |
| SCRN3     | 0,372464237  | 4,737123798 | 0,004895281 | 0,008522064 |
| MIER1     | -0,370332179 | 6,01574036  | 0,004899009 | 0,008526377 |
| FAM135A   | 0,501809039  | 5,499349718 | 0,004919644 | 0,008560105 |
| DMTF1     | 0,362253547  | 5,652975985 | 0,004927436 | 0,008571476 |
| MAP1LC3B2 | -0,355029851 | 3,141786053 | 0,004931534 | 0,008576417 |
| CEP70     | 0,53734505   | 5,309697536 | 0,004938033 | 0,00858553  |
| KIF1B     | -0,353460894 | 6,626281266 | 0,004939647 | 0,008586147 |
| ESF1      | 0,461286496  | 4,953726313 | 0,004942174 | 0,00858835  |
| FAM45A    | 0,361106618  | 5,508810755 | 0,004971457 | 0,008637036 |
| MED17     | 0,307185252  | 5,370652206 | 0,004994284 | 0,008672423 |
| SCPEP1    | 0,626737154  | 8,50356566  | 0,004994369 | 0,008672423 |
| DPCD      | 0,501542137  | 4,363336894 | 0,005000431 | 0,008680738 |
| CBLB      | 0,5452317    | 5,505317762 | 0,005033526 | 0,008735967 |
| SGSM2     | -0,484829455 | 5,441110742 | 0,005038588 | 0,008741865 |
| CCDC82    | -0,345878966 | 4,789916112 | 0,005039489 | 0,008741865 |
| HSPA9     | 0,337874281  | 8,431993599 | 0,005043119 | 0,008745939 |
| CWC15     | 0,3363167    | 6,019161808 | 0,00507014  | 0,008790563 |
| RPUSD3    | 0,382285024  | 4,919972163 | 0,005090761 | 0,008824073 |
| EXOGL     | -0,301407483 | 3,106275445 | 0,005111641 | 0,008858013 |
| AGPAT3    | -0,404263639 | 6,824466411 | 0,005119627 | 0,008869598 |
| COL3A1    | 1,130251126  | 12,12517351 | 0,005153753 | 0,008926452 |
| TULP3     | 0,459358145  | 5,627461665 | 0,005167536 | 0,008948052 |
| INPPL1    | -0,426551536 | 6,707061972 | 0,00516908  | 0,008948453 |
| IER5      | -0,579983957 | 5,953726764 | 0,005206011 | 0,009010099 |
| DLD       | 0,363885027  | 6,970450289 | 0,005222269 | 0,009035944 |
| HMG20A    | -0,26485808  | 5,668862402 | 0,005226225 | 0,009039353 |
| ATP8B1    | 0,596257456  | 6,796820196 | 0,005226891 | 0,009039353 |
| PCBP4     | -0,429702809 | 4,66891763  | 0,005252663 | 0,009081621 |
| CCDC90A   | 0,40111385   | 4,96439378  | 0,005262716 | 0,009096695 |

|          |              |             |             |             |
|----------|--------------|-------------|-------------|-------------|
| SRBD1    | -0,306703442 | 4,692032704 | 0,005267298 | 0,009102308 |
| E2F5     | 0,784751589  | 3,829947914 | 0,005279559 | 0,009121184 |
| POMP     | 0,436106163  | 7,058659073 | 0,005292253 | 0,009140799 |
| QTRTD1   | 0,355954706  | 5,614684817 | 0,005314433 | 0,009176784 |
| HERC5    | -0,685782355 | 4,220828019 | 0,005332102 | 0,009204963 |
| ARHGAP27 | -0,437668412 | 5,666376128 | 0,005334405 | 0,009206607 |
| FBXL18   | 0,475883406  | 5,27010335  | 0,005355348 | 0,009240415 |
| SETDB1   | 0,333816018  | 6,00910195  | 0,005363041 | 0,009251348 |
| LRP6     | -0,495372311 | 5,797065425 | 0,005383467 | 0,009282225 |
| PSD3     | 0,667921468  | 5,814244127 | 0,005383663 | 0,009282225 |
| RPL27A   | 0,538979318  | 10,46854779 | 0,005459013 | 0,009409759 |
| RPL13    | 0,524142763  | 10,51448355 | 0,005491811 | 0,009463901 |
| PEX10    | 0,346097474  | 5,026904505 | 0,005570385 | 0,009596881 |
| EIF4E    | 0,352967634  | 6,782246441 | 0,005589726 | 0,009627771 |
| TM9SF4   | 0,399371673  | 7,469856159 | 0,005596403 | 0,009636836 |
| MBOAT7   | 0,434775139  | 6,540311083 | 0,005608062 | 0,009654475 |
| NDST2    | -0,311118112 | 5,142770764 | 0,005625372 | 0,009681831 |
| UBE2D4   | -0,365747458 | 3,877796857 | 0,005639366 | 0,009703466 |
| EIF2C3   | 0,375897316  | 3,550980922 | 0,005644376 | 0,009709636 |
| GALNT6   | 0,819416207  | 5,85687163  | 0,00570371  | 0,009809231 |
| RAB34    | 0,448481775  | 6,768800071 | 0,005717545 | 0,009830544 |
| TDRD7    | -0,466486148 | 5,068805076 | 0,005743089 | 0,009871975 |
| HK2      | 0,781188984  | 7,984907682 | 0,005753283 | 0,009887006 |
| LANCL2   | 0,646276675  | 5,367568737 | 0,00576651  | 0,00990724  |
| PSENN    | 0,546915306  | 6,266362017 | 0,005797648 | 0,009958228 |
| SMARCA2  | -0,676512608 | 7,214275112 | 0,005823341 | 0,009999839 |
| PGRMC2   | -0,279615913 | 6,227300665 | 0,005839026 | 0,01002425  |
| SAP30    | 0,417426443  | 3,384650866 | 0,005922448 | 0,010164405 |
| LRIG1    | -0,548811607 | 6,94321235  | 0,005923646 | 0,010164405 |
| CGGBP1   | -0,387929668 | 6,755704776 | 0,005941175 | 0,010191918 |
| VPS41    | -0,288277024 | 6,374466673 | 0,006010464 | 0,010308187 |
| ZNF672   | -0,319349571 | 5,677345632 | 0,006030485 | 0,010339923 |
| TMCO7    | -0,289314406 | 4,553331334 | 0,006059756 | 0,0103875   |
| ZXDB     | -0,346864218 | 4,378804101 | 0,006065922 | 0,010395457 |
| TSPAN5   | 0,743362725  | 3,619683745 | 0,006073955 | 0,010406607 |
| PIP4K2C  | 0,317495399  | 6,709397308 | 0,00611942  | 0,01048187  |
| CHPF2    | 0,406583415  | 6,704210278 | 0,006169953 | 0,010565773 |
| TATDN2   | -0,290596655 | 6,160666314 | 0,006206068 | 0,010624951 |
| TAOK1    | -0,404649429 | 4,796861332 | 0,006221248 | 0,010647392 |
| TPP2     | -0,319472999 | 5,726608939 | 0,006222299 | 0,010647392 |
| LUC7L2   | 0,26299679   | 7,013845576 | 0,006241729 | 0,010677961 |
| ZBTB1    | -0,269407997 | 5,576346148 | 0,006244557 | 0,010680118 |
| TLE4     | -0,568727752 | 5,182481858 | 0,006255635 | 0,010696383 |
| FAM178A  | -0,305420766 | 5,267859217 | 0,006265225 | 0,010710095 |
| HNRNPA3  | 0,341019479  | 9,168559635 | 0,006283312 | 0,010738322 |
| GNAI3    | 0,310240026  | 7,409675736 | 0,006307212 | 0,010776467 |
| AGPAT6   | -0,452697946 | 6,416741508 | 0,006346485 | 0,010840851 |
| CABIN1   | -0,402746763 | 6,621164885 | 0,006372803 | 0,010883081 |
| DYNC1LI1 | -0,273349295 | 5,725318423 | 0,006398275 | 0,010923845 |
| NFE2L2   | 0,68988724   | 8,758849936 | 0,006403521 | 0,010930065 |

|          |              |             |             |             |
|----------|--------------|-------------|-------------|-------------|
| ASPH     | 0,806212855  | 8,929548136 | 0,006418267 | 0,010952493 |
| NGDN     | 0,348225194  | 5,394914237 | 0,0064246   | 0,010960557 |
| PHTF1    | -0,38157656  | 4,371977099 | 0,00643683  | 0,010978674 |
| AIFM1    | 0,305378225  | 5,791794824 | 0,006452738 | 0,011003056 |
| AMN1     | 0,550296934  | 3,952549688 | 0,006549568 | 0,011165376 |
| ATXN3    | -0,254069683 | 4,951609528 | 0,006567812 | 0,011193678 |
| ATP6V0E1 | -0,338393039 | 7,957378733 | 0,006576451 | 0,011205602 |
| CORO1C   | -0,373816481 | 8,398180563 | 0,006587189 | 0,011221095 |
| NOL6     | 0,55120893   | 6,773402127 | 0,006603197 | 0,011245554 |
| RPS26    | 0,599992241  | 8,663979373 | 0,006632518 | 0,011292669 |
| WLS      | -0,602510139 | 6,796763606 | 0,006643757 | 0,011308982 |
| HIBADH   | 0,386134863  | 6,048433828 | 0,006663775 | 0,011340225 |
| C9orf64  | -0,343069986 | 4,466030073 | 0,006699931 | 0,01139891  |
| PEF1     | -0,28592743  | 6,865699841 | 0,006717722 | 0,011426327 |
| PDHA1    | 0,355958623  | 6,437458965 | 0,006726228 | 0,011437942 |
| DYNLT1   | 0,547534585  | 6,971500421 | 0,006754182 | 0,011482614 |
| PDZD8    | -0,416411707 | 5,117753507 | 0,006760625 | 0,011490703 |
| TMEM126A | 0,416377193  | 4,575736132 | 0,006765791 | 0,011496619 |
| PPCDC    | 0,455970765  | 3,903004637 | 0,00677301  | 0,011506018 |
| EHP1L1   | -0,44139226  | 6,498733528 | 0,006794542 | 0,011539721 |
| CNOT2    | 0,294254339  | 6,513901912 | 0,006808233 | 0,011560094 |
| RPS3A    | 0,742316684  | 11,55157886 | 0,006812127 | 0,011563827 |
| DCLRE1C  | 0,333143546  | 4,309163076 | 0,006821009 | 0,011576022 |
| CLPTM1L  | 0,440775875  | 8,067204114 | 0,006824034 | 0,011578275 |
| PPP2R5E  | 0,312839287  | 5,908079445 | 0,006849368 | 0,011618369 |
| ITGB1    | -0,404803505 | 9,881046654 | 0,00685226  | 0,011620384 |
| ZNF154   | -0,695335027 | 1,374016043 | 0,006888868 | 0,01167956  |
| MAEA     | 0,405339405  | 6,15424195  | 0,006931091 | 0,011748225 |
| TOP1     | -0,336343347 | 7,454553449 | 0,006937904 | 0,011756851 |
| TSPYL4   | -0,45420449  | 5,110192336 | 0,006969436 | 0,011807351 |
| RELA     | -0,234903104 | 7,149953481 | 0,006972021 | 0,011808795 |
| BET1L    | -0,283164508 | 6,659806488 | 0,006987531 | 0,011832126 |
| DHX38    | -0,319216137 | 6,288399857 | 0,006998662 | 0,011848033 |
| SCYL2    | 0,278867317  | 6,42629105  | 0,007001667 | 0,011848407 |
| ZDHHC5   | 0,312163534  | 7,778132236 | 0,007002358 | 0,011848407 |
| ACACA    | -0,401512199 | 6,964482557 | 0,007031734 | 0,011895161 |
| MAN2A2   | -0,419000998 | 6,316515063 | 0,00704801  | 0,011919737 |
| PSPC1    | 0,355063654  | 5,797875152 | 0,007087296 | 0,011983206 |
| DDX17    | -0,266804546 | 8,883724227 | 0,007102318 | 0,012005629 |
| TNPO2    | 0,427426081  | 6,936344248 | 0,007214621 | 0,012192442 |
| ABHD4    | 0,661385237  | 6,565145756 | 0,007223238 | 0,01220398  |
| FAM120B  | -0,29361853  | 5,466876307 | 0,007233453 | 0,012217121 |
| SART3    | 0,276343035  | 6,446293672 | 0,0072346   | 0,012217121 |
| PIGT     | 0,407582978  | 7,918802464 | 0,007250776 | 0,012241232 |
| VPS45    | 0,291169083  | 5,684939257 | 0,007252468 | 0,012241232 |
| RFNG     | 0,400985172  | 5,443320214 | 0,007279725 | 0,012284198 |
| KIAA0922 | -0,420447656 | 4,951301091 | 0,007284914 | 0,012289912 |
| MYO7A    | 0,724583033  | 3,862701597 | 0,007316916 | 0,012340848 |
| NFKBIL1  | 0,39623804   | 4,590094048 | 0,007324194 | 0,012350068 |
| PRDX6    | 0,404401991  | 8,696258075 | 0,00733756  | 0,012369549 |

|           |              |             |             |             |
|-----------|--------------|-------------|-------------|-------------|
| FAM192A   | 0,287948898  | 6,532838085 | 0,007378508 | 0,012435504 |
| RNF11     | -0,370757772 | 7,29027299  | 0,007384063 | 0,01244179  |
| ST6GAL1   | -0,698942181 | 7,15578621  | 0,007390625 | 0,012449771 |
| RPL32P3   | 0,587176835  | 3,245097684 | 0,007434369 | 0,012520366 |
| PDE7A     | 0,562651347  | 5,687715145 | 0,007469411 | 0,012576275 |
| CIR1      | -0,263128619 | 5,667864305 | 0,007482319 | 0,012594898 |
| CD320     | 0,584103723  | 5,551110192 | 0,007488973 | 0,012602988 |
| LYN       | -0,544394278 | 6,975781881 | 0,007495713 | 0,012611218 |
| PREP      | 0,562637499  | 6,564659508 | 0,007505066 | 0,012623839 |
| TOP2B     | -0,347851922 | 7,368410587 | 0,007539012 | 0,01267781  |
| TLE3      | 0,349997828  | 6,783916096 | 0,007599138 | 0,012774712 |
| EIF4EBP3  | -0,5428911   | 2,665932793 | 0,007600382 | 0,012774712 |
| HIST1H2AC | 0,799299783  | 5,778977399 | 0,007613116 | 0,012790344 |
| CYP51A1   | -0,511129934 | 7,535156205 | 0,007613434 | 0,012790344 |
| RPF1      | 0,356307057  | 5,540190453 | 0,007623383 | 0,012802016 |
| EBPL      | 0,523481879  | 5,459477958 | 0,007624137 | 0,012802016 |
| TEP1      | -0,394784468 | 5,516406126 | 0,007629554 | 0,01280796  |
| TRAF2     | 0,44798053   | 4,857764102 | 0,007656692 | 0,012848966 |
| MBD6      | 0,388344043  | 6,523733621 | 0,00765775  | 0,012848966 |
| ZNF654    | -0,407775565 | 4,244681061 | 0,007674897 | 0,012870252 |
| IER3IP1   | 0,464397923  | 6,506057637 | 0,007674995 | 0,012870252 |
| SBF2      | -0,348149971 | 5,723143059 | 0,007676098 | 0,012870252 |
| WDR34     | 0,519120905  | 6,158903103 | 0,007678074 | 0,0128704   |
| TM7SF3    | 0,504964914  | 7,638871077 | 0,007687044 | 0,01288227  |
| ARHGEF11  | -0,328408905 | 6,429848273 | 0,007702835 | 0,012905561 |
| RTEL1     | 0,544712839  | 4,793908941 | 0,007714355 | 0,012921687 |
| ACOT9     | -0,372184757 | 5,493707995 | 0,007728707 | 0,012942548 |
| C17orf59  | -0,316890913 | 3,51762867  | 0,007794493 | 0,013049509 |
| C10orf12  | 0,469198329  | 3,127690167 | 0,007823911 | 0,013095545 |
| GLUL      | -0,487632689 | 10,25263965 | 0,007837842 | 0,013115643 |
| CCNT2     | 0,30912492   | 5,546903841 | 0,00789002  | 0,013199718 |
| TTC17     | -0,256781971 | 6,211134278 | 0,007912817 | 0,013234146 |
| INTS2     | 0,340038787  | 4,822955361 | 0,007914581 | 0,013234146 |
| DUSP23    | 0,559309187  | 5,538301347 | 0,007916422 | 0,013234146 |
| SUPT4H1   | 0,357301887  | 6,684117536 | 0,007920645 | 0,01323796  |
| KRAS      | 0,503709387  | 6,791252389 | 0,007945808 | 0,013276761 |
| ADAMTS12  | 1,077228575  | 4,40202995  | 0,007986962 | 0,013342257 |
| ASF1A     | 0,489467398  | 5,571710395 | 0,008022199 | 0,013397839 |
| TSNAX     | 0,402539705  | 6,169286763 | 0,008031482 | 0,013410057 |
| MRS2      | 0,43696514   | 5,745424506 | 0,008096707 | 0,013515653 |
| LDB1      | 0,36867392   | 6,560789546 | 0,008127373 | 0,013563523 |
| TNFRSF14  | -0,519745453 | 5,804559584 | 0,008142117 | 0,01358203  |
| RNGTT     | 0,313768604  | 5,168836677 | 0,008142446 | 0,01358203  |
| DNAJB14   | -0,302399787 | 4,604024864 | 0,00816528  | 0,013616787 |
| PLAGL2    | 0,482630887  | 6,530689781 | 0,008175819 | 0,013631029 |
| NSL1      | 0,453050784  | 5,706214328 | 0,008181217 | 0,013636694 |
| B9D1      | 0,62986634   | 3,883590375 | 0,008218894 | 0,013696148 |
| SCAP      | -0,270079266 | 6,630932222 | 0,008252558 | 0,013748886 |
| ASH1L     | -0,375977365 | 6,572889876 | 0,008263852 | 0,01376434  |
| PDIK1L    | 0,375691881  | 4,30324687  | 0,008289415 | 0,013803546 |

|          |              |             |             |             |
|----------|--------------|-------------|-------------|-------------|
| PBX2     | -0,329249439 | 6,655948032 | 0,008306243 | 0,013825213 |
| ETFDH    | -0,33313622  | 4,255287948 | 0,008306482 | 0,013825213 |
| CAPG     | -0,489686114 | 8,153490518 | 0,008315642 | 0,013837083 |
| PYGL     | 0,841702856  | 6,987020224 | 0,008332282 | 0,013861388 |
| ZNF740   | 0,305163213  | 5,671890436 | 0,008340262 | 0,01387128  |
| PLXNA1   | 0,590543398  | 7,679261559 | 0,008397604 | 0,013963243 |
| SRRM2    | -0,432495566 | 8,984971014 | 0,008404582 | 0,013971439 |
| ZCCHC17  | 0,387682708  | 5,81485612  | 0,008423463 | 0,013999413 |
| IGF1R    | 0,67515598   | 7,434458099 | 0,008426686 | 0,014001358 |
| RPA2     | 0,410195631  | 6,217859471 | 0,008476363 | 0,014080468 |
| USP42    | 0,329582426  | 4,78187948  | 0,008490574 | 0,014100639 |
| MCCC2    | 0,332906538  | 6,562634406 | 0,008533102 | 0,014167817 |
| SDHD     | 0,386330725  | 7,469688636 | 0,008556872 | 0,014203824 |
| LONRF1   | -0,451048726 | 5,004646681 | 0,00857534  | 0,014231016 |
| MINPP1   | 0,461875955  | 5,105404792 | 0,008601643 | 0,014269257 |
| MPPE1    | -0,317574624 | 5,773475243 | 0,008602569 | 0,014269257 |
| KRT8     | 0,649438034  | 10,11921917 | 0,008668081 | 0,014374427 |
| MRPL1    | 0,470439029  | 4,670917115 | 0,008700973 | 0,014425465 |
| ADCY3    | 0,429897998  | 6,732158574 | 0,008705771 | 0,01442991  |
| NARS     | 0,341416327  | 7,727800569 | 0,008715406 | 0,014442371 |
| UBR3     | -0,293530007 | 6,001417838 | 0,008726217 | 0,014456772 |
| ORAI2    | -0,371422437 | 6,076435907 | 0,008792865 | 0,01456365  |
| NLGN2    | 0,51869338   | 5,257856485 | 0,008817084 | 0,014600217 |
| TMEM120B | -0,395207494 | 5,454357055 | 0,008843579 | 0,014640535 |
| STYX     | 0,312876738  | 5,468577017 | 0,008873573 | 0,014686624 |
| SLC38A2  | 0,462819875  | 8,867363024 | 0,008893062 | 0,014715309 |
| RHBDD2   | -0,350236056 | 7,414710584 | 0,008897167 | 0,014718531 |
| FAT1     | 0,748869773  | 8,009532054 | 0,008922378 | 0,014756657 |
| ANKRD50  | -0,480656001 | 5,919419737 | 0,008932693 | 0,014770134 |
| IMPA1    | 0,408973055  | 5,279836968 | 0,008982465 | 0,014848831 |
| WIPI1    | 0,532053256  | 6,072775097 | 0,008987356 | 0,014853316 |
| DYNC1H1  | -0,407435428 | 9,068691062 | 0,008997255 | 0,014866073 |
| UHRF2    | 0,452756792  | 5,477257213 | 0,009015325 | 0,014892321 |
| SREBF1   | 0,478254716  | 7,428192389 | 0,009056535 | 0,014956772 |
| PPP2R1B  | 0,357241397  | 5,938574563 | 0,009095589 | 0,015017633 |
| UBE2J1   | -0,333476931 | 6,940961619 | 0,0091209   | 0,015055778 |
| ATP5F1   | 0,388579556  | 7,795686889 | 0,009164303 | 0,015123762 |
| BTBD3    | -0,425546669 | 5,719164806 | 0,009182081 | 0,015149433 |
| PANK2    | 0,296521972  | 5,243756224 | 0,009188058 | 0,015155628 |
| GLT25D1  | 0,403008259  | 8,097617355 | 0,009240245 | 0,015238025 |
| HDAC6    | -0,330285643 | 5,810791017 | 0,009264577 | 0,015271514 |
| POLE4    | 0,515101593  | 5,829660761 | 0,009265431 | 0,015271514 |
| ELK4     | 0,370638191  | 3,852060315 | 0,009267272 | 0,015271514 |
| DCAF16   | 0,403062653  | 5,635758928 | 0,009343458 | 0,015393341 |
| PXN      | -0,458258631 | 7,426397387 | 0,009368652 | 0,01543112  |
| SYNE2    | -0,468049119 | 7,352116826 | 0,009378111 | 0,01544297  |
| PPP1R7   | -0,251441723 | 6,031094288 | 0,009434922 | 0,01553277  |
| TBC1D17  | -0,314300249 | 5,719970405 | 0,009469824 | 0,015586467 |
| PLS3     | -0,402054662 | 8,847021297 | 0,009530436 | 0,015682442 |
| GLA      | 0,552233768  | 5,878864386 | 0,009533019 | 0,015682909 |

|              |              |             |             |             |
|--------------|--------------|-------------|-------------|-------------|
| RAB2A        | 0,325357808  | 6,49853482  | 0,009556708 | 0,015718087 |
| DYM          | 0,337900859  | 5,758810678 | 0,009567063 | 0,015731325 |
| SPDYE7P      | 0,406974395  | 4,533471577 | 0,009608841 | 0,015795194 |
| POSTN        | 1,015605411  | 9,111277228 | 0,009610538 | 0,015795194 |
| TMEM98       | -0,554700005 | 6,301520145 | 0,009614593 | 0,015795376 |
| IDI1         | -0,446869852 | 6,789275241 | 0,009615282 | 0,015795376 |
| TEX264       | -0,295637163 | 5,802872602 | 0,009621292 | 0,015801443 |
| AXIN1        | 0,372788688  | 5,663602781 | 0,009698811 | 0,01592492  |
| C6orf1       | 0,427804028  | 4,983965402 | 0,009718788 | 0,01595388  |
| FAM149B1     | -0,3372016   | 4,677100685 | 0,009726488 | 0,015962676 |
| CHCHD3       | 0,302427113  | 6,130276171 | 0,0098196   | 0,016111611 |
| ASH2L        | 0,598024694  | 6,609669889 | 0,009836708 | 0,016135798 |
| DLAT         | 0,309239999  | 6,14965294  | 0,009888783 | 0,016217319 |
| OTUD5        | -0,242345408 | 6,316926592 | 0,00991011  | 0,016248387 |
| YPEL5        | -0,339045626 | 7,488541988 | 0,009913764 | 0,01625047  |
| SMARCD3      | -0,59966756  | 4,89398399  | 0,00994018  | 0,016289855 |
| RWDD2B       | 0,39372508   | 4,817008523 | 0,009944418 | 0,016292884 |
| C1orf52      | 0,391856219  | 4,646117521 | 0,01000151  | 0,016382487 |
| AP3B1        | -0,278556637 | 6,251984546 | 0,010022661 | 0,01641319  |
| VPS8         | 0,508472257  | 6,173963057 | 0,010054368 | 0,016461161 |
| ATG3         | 0,337336816  | 6,38545951  | 0,010170854 | 0,016647876 |
| GLO1         | 0,43923018   | 7,999909688 | 0,010173825 | 0,016648744 |
| FAM18B2      | 0,310349525  | 4,15083904  | 0,010195499 | 0,016680208 |
| KLHDC5       | 0,488469351  | 6,07771715  | 0,010201674 | 0,016686307 |
| RFC1         | -0,308459135 | 6,27955048  | 0,010204436 | 0,016686823 |
| SEC31A       | -0,284522693 | 7,979282881 | 0,010211006 | 0,016693563 |
| STK25        | 0,292957845  | 6,818171675 | 0,010238996 | 0,01673531  |
| EXT1         | 0,490500245  | 7,147821147 | 0,010293686 | 0,016820667 |
| VOPP1        | 0,518200058  | 7,793906857 | 0,010311496 | 0,016845733 |
| TRAF3        | 0,365207874  | 4,774699652 | 0,01040189  | 0,016989339 |
| WRB          | -0,361751629 | 4,83328662  | 0,010427417 | 0,017026953 |
| SF3A3        | 0,291644798  | 6,987305221 | 0,010442401 | 0,017047338 |
| SCAMP1       | 0,388862004  | 6,646162115 | 0,01046214  | 0,017075475 |
| SCO1         | 0,28051647   | 4,719352322 | 0,010469867 | 0,017083997 |
| STEAP2       | 0,557823769  | 5,409923234 | 0,010558366 | 0,017224282 |
| SLC16A3      | 0,605163372  | 7,110395294 | 0,01056673  | 0,017233803 |
| PRMT2        | -0,296703635 | 6,76167571  | 0,010641576 | 0,017351723 |
| GRSF1        | 0,279443865  | 7,198062229 | 0,010650095 | 0,017361463 |
| SPA17        | -0,503180845 | 3,219401589 | 0,010674542 | 0,017397156 |
| NRF1         | -0,166692208 | 4,62657369  | 0,010747519 | 0,017511907 |
| WBP11        | 0,306585146  | 7,459030514 | 0,010750538 | 0,017512642 |
| LOC100132832 | 0,427972788  | 2,605326166 | 0,010764651 | 0,017531444 |
| C6orf47      | -0,25870398  | 5,355952326 | 0,010789346 | 0,017567466 |
| DFFA         | 0,307739171  | 5,637230213 | 0,01087664  | 0,017705373 |
| TAF1B        | 0,366849978  | 4,720626704 | 0,010880067 | 0,017706725 |
| GBP5         | 0,918258333  | 6,023241844 | 0,010914809 | 0,017759027 |
| IKZF5        | -0,336558831 | 4,86560413  | 0,010942722 | 0,017800196 |
| ATE1         | -0,295307286 | 4,075236945 | 0,010955607 | 0,017816906 |
| HDAC10       | 0,40291782   | 5,105712201 | 0,011032979 | 0,01793647  |
| ANKRD36      | 0,487865783  | 3,079267361 | 0,011034388 | 0,01793647  |

|           |              |             |             |             |
|-----------|--------------|-------------|-------------|-------------|
| POMGNT1   | 0,352219315  | 6,873777448 | 0,011057245 | 0,017969341 |
| DDX19B    | -0,284138307 | 5,438848932 | 0,011075468 | 0,017994667 |
| VPS16     | 0,298850536  | 5,862898465 | 0,011095537 | 0,01802298  |
| AGAP3     | -0,360300625 | 6,43335942  | 0,011119821 | 0,018058124 |
| CUL7      | 0,441987745  | 6,188217287 | 0,011160729 | 0,018120241 |
| ZNF652    | -0,326082943 | 5,905589943 | 0,01124474  | 0,018252293 |
| CDR2      | -0,313426399 | 5,178831486 | 0,01130401  | 0,018344133 |
| GOLPH3    | 0,330009961  | 7,853263144 | 0,011316779 | 0,018360485 |
| KIAA1191  | -0,245301874 | 7,219785758 | 0,011323686 | 0,01836732  |
| APPBP2    | -0,261105911 | 5,965274174 | 0,011330145 | 0,018373427 |
| EEF1B2    | 0,499270529  | 9,158896096 | 0,011420626 | 0,01851575  |
| HSPA8     | 0,325449493  | 10,83760123 | 0,011464142 | 0,018581884 |
| HNRNPA1L2 | 0,274916855  | 6,493035566 | 0,011491851 | 0,01862237  |
| HECA      | -0,362247835 | 6,462110598 | 0,011524379 | 0,018670643 |
| C8orf40   | 0,480713534  | 5,406355164 | 0,011578313 | 0,018753568 |
| KIAA1586  | 0,47554298   | 3,581435685 | 0,011583023 | 0,018756741 |
| PRDX3     | 0,451041914  | 7,69630827  | 0,011607105 | 0,018791275 |
| BCKDK     | 0,29289328   | 6,24547935  | 0,011621471 | 0,018810066 |
| PLEKHJ1   | 0,37480864   | 5,605811579 | 0,011640992 | 0,018837191 |
| SERPINB1  | -0,61863067  | 7,477337019 | 0,011647133 | 0,018842658 |
| ST13      | 0,31594838   | 8,906228202 | 0,01174753  | 0,019000571 |
| TRIP10    | -0,37328049  | 5,938639715 | 0,011804445 | 0,019085192 |
| LMTK2     | -0,425999985 | 4,887083155 | 0,011805447 | 0,019085192 |
| MYOF      | -0,51140698  | 7,938333805 | 0,01183895  | 0,019134819 |
| HNRNPA1   | 0,280832042  | 10,30960301 | 0,011891845 | 0,019215756 |
| LAPTM4A   | -0,296498471 | 8,825257199 | 0,011924108 | 0,019263324 |
| PHKB      | -0,326813491 | 6,748485586 | 0,01194146  | 0,019286787 |
| C2orf69   | 0,314741526  | 5,027962224 | 0,011948846 | 0,019290409 |
| DDHD1     | -0,379405896 | 4,890946615 | 0,01194936  | 0,019290409 |
| TRIM41    | -0,304208721 | 5,064364164 | 0,011966823 | 0,019314027 |
| SAR1B     | 0,48004658   | 5,453592905 | 0,011974287 | 0,0193215   |
| EGLN1     | 0,44457911   | 6,762543055 | 0,012049945 | 0,019438981 |
| S100A10   | -0,515981541 | 9,080918182 | 0,012210642 | 0,01969356  |
| GPA1      | 0,380055838  | 7,266211133 | 0,01223106  | 0,019721825 |
| CCNK      | 0,339342675  | 6,476600366 | 0,012270947 | 0,019781463 |
| CREB1     | -0,204667025 | 6,079342256 | 0,012302151 | 0,019827078 |
| ZNF592    | -0,32269378  | 6,211846821 | 0,01230558  | 0,019827918 |
| AHCTF1    | 0,359146996  | 6,786612145 | 0,01235487  | 0,019902637 |
| SYK       | -0,452346555 | 6,625528445 | 0,012383123 | 0,019943438 |
| XRN2      | 0,271849128  | 7,484210987 | 0,012393135 | 0,01995485  |
| PWP2      | 0,343798899  | 5,659447246 | 0,012399356 | 0,019960154 |
| GDI2      | 0,336167839  | 8,716072905 | 0,012481466 | 0,020087589 |
| TTC8      | 0,389570377  | 4,529450875 | 0,012485226 | 0,020088899 |
| RALY      | 0,291390165  | 7,884541831 | 0,012512162 | 0,020127491 |
| COL1A1    | 1,070265852  | 12,21327808 | 0,012529072 | 0,020149939 |
| EID1      | -0,309890647 | 7,732701518 | 0,012589828 | 0,02024251  |
| MX1       | -0,675891942 | 7,226906683 | 0,012593752 | 0,02024251  |
| WWTR1     | -0,51900333  | 5,904022471 | 0,012595538 | 0,02024251  |
| DYNC2LI1  | -0,295394096 | 4,49764602  | 0,012710166 | 0,020421919 |
| ABCA1     | -0,465525321 | 6,573893565 | 0,012832795 | 0,020614094 |



|           |              |             |             |             |
|-----------|--------------|-------------|-------------|-------------|
| DNAJC21   | 0,341579136  | 6,864150126 | 0,012897097 | 0,020710881 |
| GALK1     | 0,51416178   | 4,747564894 | 0,012899122 | 0,020710881 |
| ZNF461    | 0,491179398  | 3,192032298 | 0,012906059 | 0,020717142 |
| NTAN1     | -0,287335835 | 5,109542149 | 0,012911353 | 0,020720762 |
| KIRREL    | -0,633010388 | 4,524775379 | 0,012988759 | 0,020840082 |
| C6orf62   | -0,297912725 | 7,647364888 | 0,013050936 | 0,020934917 |
| TMEM9     | 0,452850209  | 7,360910903 | 0,013057556 | 0,02094061  |
| LOC283070 | -0,560233541 | 4,344896437 | 0,013063496 | 0,02094521  |
| VAV3      | 0,982716431  | 5,268868661 | 0,013074715 | 0,02095827  |
| MAP1B     | 1,068863301  | 7,291157281 | 0,013152643 | 0,02107823  |
| PGAP1     | 0,646896355  | 5,813169783 | 0,013189843 | 0,02113288  |
| THOC7     | 0,325468658  | 5,941893714 | 0,013208377 | 0,021157605 |
| PHF8      | 0,50118468   | 6,249341831 | 0,01324571  | 0,021212423 |
| RPS15A    | 0,496180952  | 9,975935085 | 0,013270489 | 0,021247115 |
| H2AFY     | 0,282273651  | 8,142840609 | 0,013278562 | 0,02125505  |
| SAV1      | -0,313019925 | 5,740880843 | 0,01330654  | 0,021294836 |
| HDGFRP2   | 0,332377985  | 6,026784503 | 0,013312216 | 0,02129892  |
| CUTA      | 0,379403796  | 6,951191299 | 0,013392023 | 0,021421582 |
| SCNN1A    | -0,771163702 | 7,67925336  | 0,013435541 | 0,021486152 |
| TCTN1     | -0,327268876 | 5,168439557 | 0,013554796 | 0,021669668 |
| DDX26B    | 0,492313243  | 3,469943914 | 0,013556651 | 0,021669668 |
| COG5      | 0,266481717  | 6,320925787 | 0,013594927 | 0,021725758 |
| GBP2      | -0,458581069 | 6,915331987 | 0,013742008 | 0,021955659 |
| ZNF468    | 0,569234483  | 4,979055473 | 0,013822512 | 0,022079107 |
| PRPSAP1   | 0,340993369  | 6,120772169 | 0,013835102 | 0,022094042 |
| LPGAT1    | 0,331073469  | 6,703981925 | 0,013856573 | 0,022119242 |
| KIAA0284  | 0,515213304  | 6,587753905 | 0,01385737  | 0,022119242 |
| RTTN      | 0,494436379  | 4,282981937 | 0,013888984 | 0,022164517 |
| PTP4A1    | -0,443845167 | 8,386991704 | 0,013901767 | 0,022179726 |
| HECTD2    | -0,351940756 | 3,554590226 | 0,013979044 | 0,022297802 |
| C16orf80  | 0,322286368  | 5,674561328 | 0,014102643 | 0,022489691 |
| DPH1      | 0,256049332  | 6,131277195 | 0,014119518 | 0,022509331 |
| KIAA1147  | -0,409474074 | 6,103632219 | 0,01412156  | 0,022509331 |
| ZBED5     | 0,330085373  | 5,830666299 | 0,01414035  | 0,022534014 |
| PATZ1     | 0,4762971    | 6,085065565 | 0,014172869 | 0,022580559 |
| CD248     | -0,615649487 | 5,744125655 | 0,014213527 | 0,022640047 |
| TRAPPC1   | -0,267951186 | 6,509597773 | 0,014255136 | 0,022701021 |
| CASC3     | -0,297453817 | 7,130263443 | 0,014295956 | 0,02276071  |
| RAB18     | 0,406618153  | 7,205279275 | 0,014369917 | 0,022873125 |
| ANKLE2    | 0,286553164  | 6,893963964 | 0,014420224 | 0,022945798 |
| GBF1      | -0,30089938  | 7,03403497  | 0,014422304 | 0,022945798 |
| PLAT      | 1,061674952  | 7,507862971 | 0,014475945 | 0,023025769 |
| BRD4      | 0,385118416  | 7,254352135 | 0,014581876 | 0,023188855 |
| NUP98     | -0,273557489 | 7,323148884 | 0,014703897 | 0,023377448 |
| C19orf66  | -0,371695984 | 4,912639731 | 0,014711905 | 0,023384727 |
| ACOT8     | 0,353045715  | 4,658749597 | 0,014715471 | 0,023384945 |
| STK16     | 0,348622329  | 5,456215729 | 0,014742037 | 0,023421703 |
| ATG16L1   | 0,30233328   | 5,443766115 | 0,014748997 | 0,023423447 |
| SEPT6     | -0,491949566 | 5,526850804 | 0,014750005 | 0,023423447 |
| NECAB3    | -0,41996375  | 4,93948818  | 0,01476196  | 0,023436974 |

|           |              |             |             |             |
|-----------|--------------|-------------|-------------|-------------|
| ERCC8     | 0,302002192  | 3,607055084 | 0,014832146 | 0,023542925 |
| PPP2R3C   | -0,362067361 | 4,930217475 | 0,014873235 | 0,02360265  |
| RLIM      | -0,226771148 | 6,493459703 | 0,014906205 | 0,023649467 |
| GSPT2     | -0,526382894 | 3,855101236 | 0,014912337 | 0,023653692 |
| DAAM1     | -0,450098201 | 5,06371242  | 0,01499379  | 0,023777361 |
| DCTN4     | -0,257154803 | 6,620862568 | 0,015027547 | 0,023825354 |
| RBM15B    | -0,270629674 | 6,607347733 | 0,015080363 | 0,023903533 |
| IGFBP5    | 0,889984428  | 9,871301468 | 0,015096214 | 0,023923096 |
| STK3      | 0,289074331  | 5,556402183 | 0,015102228 | 0,023927066 |
| ELMOD2    | 0,321687458  | 3,915028594 | 0,015222864 | 0,024112592 |
| CMTM3     | -0,432569199 | 5,75464272  | 0,015319471 | 0,02425998  |
| LRRC16A   | -0,382895712 | 5,628765497 | 0,01534512  | 0,024294955 |
| DAGLB     | -0,276373917 | 5,05737604  | 0,015409142 | 0,024390654 |
| SERINC5   | -0,493236673 | 4,190075874 | 0,015446907 | 0,024444758 |
| GGA3      | -0,291231449 | 5,722107057 | 0,015454147 | 0,02445054  |
| GAA       | -0,42166001  | 7,81061505  | 0,015512174 | 0,024536654 |
| SLC29A1   | -0,410035367 | 6,329775287 | 0,015609778 | 0,024683658 |
| REL       | -0,472264106 | 3,609301095 | 0,01561235  | 0,024683658 |
| VPS13A    | -0,361205189 | 4,971230952 | 0,015753384 | 0,024900863 |
| EEF2K     | -0,310206448 | 6,28656639  | 0,015776108 | 0,024931004 |
| PABPC4    | 0,56972098   | 7,994395856 | 0,015791239 | 0,024949133 |
| PPRC1     | -0,332708371 | 6,257332192 | 0,015841763 | 0,02502316  |
| ZFYVE27   | -0,272249403 | 4,969246672 | 0,015863055 | 0,025050989 |
| CCDC23    | 0,392838847  | 4,469367141 | 0,015909369 | 0,025115815 |
| PRR24     | -0,385317087 | 3,09768174  | 0,015911716 | 0,025115815 |
| ATP6V1G1  | 0,345942302  | 7,420664575 | 0,015915154 | 0,025115815 |
| EFNB1     | 0,670658912  | 6,989645664 | 0,016013014 | 0,025264401 |
| TMEM185A  | 0,301326519  | 5,037268351 | 0,016097422 | 0,0253917   |
| PI4KAP1   | 0,573831944  | 4,409039767 | 0,016245733 | 0,025619717 |
| SUMO3     | 0,341341566  | 7,701067253 | 0,016317864 | 0,025727518 |
| SH2D2A    | 0,573761285  | 3,331942516 | 0,016408834 | 0,025864964 |
| MFSD1     | -0,313094835 | 7,155256845 | 0,016550168 | 0,026081719 |
| CMTM6     | -0,31588864  | 7,575380305 | 0,016582121 | 0,026126037 |
| NCOA2     | -0,452752072 | 5,263634041 | 0,016648839 | 0,026225094 |
| MPZL1     | 0,363580585  | 7,998017623 | 0,016737266 | 0,026358296 |
| CXCR4     | -0,587473428 | 7,064699667 | 0,016787202 | 0,026430832 |
| NKTR      | -0,374048667 | 5,655188357 | 0,016803245 | 0,026449983 |
| TNFRSF10B | -0,433562493 | 6,570583953 | 0,016840413 | 0,026502371 |
| PCCA      | -0,440763144 | 4,437329148 | 0,016879925 | 0,026558423 |
| BAG2      | 0,678829843  | 4,811523004 | 0,016884351 | 0,026559259 |
| ZHX2      | -0,409515139 | 5,832957015 | 0,016977448 | 0,026699543 |
| SNRNP200  | 0,349061241  | 8,759178141 | 0,016989238 | 0,026711924 |
| PPP1R12A  | -0,20134828  | 6,587692253 | 0,017001441 | 0,026724949 |
| PFKL      | 0,336573691  | 7,91926234  | 0,017063455 | 0,026816247 |
| PIKFYVE   | -0,353270029 | 5,564271517 | 0,01708327  | 0,026841202 |
| WEE1      | 0,439072267  | 6,092406344 | 0,01709039  | 0,026846203 |
| SPCS3     | -0,324666595 | 7,550282859 | 0,01712799  | 0,026897196 |
| MED22     | -0,298179191 | 5,264669392 | 0,017130741 | 0,026897196 |
| SMYD2     | 0,337479318  | 6,208857088 | 0,017184645 | 0,02697562  |
| FAR1      | 0,361422715  | 6,61889738  | 0,017291869 | 0,027137688 |

|          |              |             |             |             |
|----------|--------------|-------------|-------------|-------------|
| ZNF335   | 0,29626694   | 5,082947869 | 0,017357197 | 0,027231488 |
| MTMR3    | -0,298941079 | 6,546267806 | 0,017359625 | 0,027231488 |
| UBE2D3   | -0,253129616 | 8,557287571 | 0,017430174 | 0,027331508 |
| MAST2    | 0,418238129  | 5,98289653  | 0,017431402 | 0,027331508 |
| PELP1    | 0,340454199  | 6,474947303 | 0,0175706   | 0,02754343  |
| NGRN     | 0,319707457  | 7,299022438 | 0,01763744  | 0,027641853 |
| POM121C  | 0,332619479  | 6,851770532 | 0,017655535 | 0,027663855 |
| FAU      | 0,379280283  | 8,917287031 | 0,017742141 | 0,027793169 |
| C1R      | -0,503267639 | 9,140539274 | 0,017768281 | 0,027827723 |
| COX18    | 0,361041791  | 5,115976236 | 0,017801233 | 0,02787293  |
| PDCL     | -0,268450358 | 5,190730939 | 0,017832755 | 0,027915876 |
| ZNF24    | -0,29894302  | 6,76929306  | 0,017838685 | 0,02791875  |
| PTPN11   | -0,323427691 | 7,520741266 | 0,017843873 | 0,02792046  |
| ORMDL1   | 0,278611105  | 5,516424765 | 0,017875762 | 0,027963941 |
| TMED1    | 0,344459343  | 5,073734216 | 0,017887019 | 0,027973501 |
| PAK4     | 0,477705465  | 6,744266423 | 0,017890078 | 0,027973501 |
| SLC9A6   | -0,250791571 | 5,208021922 | 0,017906933 | 0,027993439 |
| EIF5B    | 0,336645341  | 7,778712864 | 0,017983707 | 0,028107013 |
| PLK1S1   | 0,513392839  | 4,549291749 | 0,017989459 | 0,028109561 |
| CCDC9    | -0,326146734 | 4,794163265 | 0,018077313 | 0,028234933 |
| YTHDC1   | -0,213871126 | 6,451831384 | 0,018077976 | 0,028234933 |
| CROT     | 0,58626163   | 5,011129129 | 0,018140684 | 0,028326385 |
| FTSJ3    | 0,302003339  | 6,446173986 | 0,018176913 | 0,028376459 |
| DERL1    | 0,244750662  | 7,436231796 | 0,018261748 | 0,02850237  |
| DECR1    | -0,317133555 | 6,076814657 | 0,018289701 | 0,028539467 |
| CDK11B   | -0,280483056 | 5,64519084  | 0,018303413 | 0,028554329 |
| MED21    | 0,38685241   | 5,759442187 | 0,01833729  | 0,028597037 |
| DDRGK1   | -0,29945263  | 6,008915466 | 0,018339375 | 0,028597037 |
| ZMYM2    | 0,331848206  | 6,42373019  | 0,01834337  | 0,028597037 |
| CTPS2    | 0,420883597  | 5,187027418 | 0,018350299 | 0,0286013   |
| SLC39A3  | 0,308568987  | 5,040273683 | 0,01842156  | 0,028705808 |
| SAFB2    | -0,313632887 | 5,708102043 | 0,018428384 | 0,028709881 |
| CPSF7    | 0,235473895  | 7,054425784 | 0,018439601 | 0,028720795 |
| GOLGA5   | 0,260895758  | 6,465181538 | 0,018466097 | 0,028755496 |
| EPS15L1  | 0,327994395  | 5,919038872 | 0,018481442 | 0,02877282  |
| PIP5K1A  | 0,275202269  | 6,805527899 | 0,018499855 | 0,028794913 |
| GTF2H5   | 0,376542208  | 5,544119782 | 0,018579542 | 0,028912345 |
| MBTPS2   | 0,362424844  | 5,32684662  | 0,018656807 | 0,029025957 |
| ODF2     | 0,321646983  | 5,963349188 | 0,018713966 | 0,029108242 |
| SAP130   | 0,286783382  | 5,73944997  | 0,018792526 | 0,029223771 |
| ZNF264   | -0,318831259 | 5,660182124 | 0,018873457 | 0,029341936 |
| UNC50    | 0,310908393  | 5,677203828 | 0,018877119 | 0,029341936 |
| RCHY1    | -0,39002652  | 4,869934759 | 0,018885749 | 0,029348661 |
| LSM3     | 0,34132909   | 5,673084588 | 0,018960788 | 0,029458559 |
| CUL1     | 0,254555876  | 6,837547273 | 0,019188941 | 0,029806239 |
| CREBBP   | -0,330801462 | 7,094069866 | 0,019211166 | 0,029833965 |
| RNF166   | -0,306971427 | 4,324920874 | 0,019270848 | 0,029919835 |
| INO80C   | 0,476546048  | 4,755093233 | 0,019313015 | 0,029978478 |
| UBE2Q1   | 0,22507631   | 7,140887402 | 0,01931829  | 0,029979841 |
| NOTCH2NL | -0,390254907 | 5,221844674 | 0,019382376 | 0,030072451 |

|          |              |             |             |             |
|----------|--------------|-------------|-------------|-------------|
| SPATA20  | 0,432698048  | 6,048233581 | 0,019423954 | 0,030130105 |
| RUNDC1   | -0,243593596 | 5,235691221 | 0,01950451  | 0,030248181 |
| TMX3     | -0,308335192 | 6,082775766 | 0,019537246 | 0,03029206  |
| NDUFV2   | 0,337874492  | 6,922873066 | 0,019542058 | 0,030292633 |
| FAM96B   | 0,425720458  | 6,364102359 | 0,019577879 | 0,030341262 |
| HELZ     | -0,27208999  | 6,160272814 | 0,019604921 | 0,030376269 |
| DDX59    | 0,328253539  | 4,887026039 | 0,019638236 | 0,030420975 |
| PACS2    | -0,298321147 | 6,321406342 | 0,019717249 | 0,030536435 |
| NCLN     | 0,289510444  | 6,870618068 | 0,019797723 | 0,030654104 |
| PPP2R1A  | 0,251208047  | 8,633494223 | 0,019928179 | 0,030849092 |
| SNX27    | -0,258723171 | 6,200508737 | 0,019995971 | 0,03094701  |
| SNX16    | 0,374595838  | 4,123959655 | 0,020077926 | 0,031066798 |
| MPZL3    | -0,421337063 | 2,571778225 | 0,020090302 | 0,031078895 |
| MLEC     | -0,291748426 | 8,096895153 | 0,020197019 | 0,031236895 |
| HSD17B12 | -0,312593674 | 7,099084397 | 0,020295311 | 0,031381798 |
| CYP7B1   | -0,566653716 | 2,817104652 | 0,020310474 | 0,031398124 |
| TPM2     | -0,558199353 | 7,081339492 | 0,020395201 | 0,031521957 |
| LSMD1    | 0,444835358  | 5,061617264 | 0,020460948 | 0,031616407 |
| TMEM19   | 0,424609348  | 6,371571894 | 0,020512875 | 0,031689464 |
| RBBP4    | 0,356041036  | 8,052098294 | 0,020518819 | 0,031691467 |
| CHST14   | 0,355573191  | 5,645966526 | 0,020572394 | 0,031767018 |
| MDN1     | -0,409406516 | 5,654229829 | 0,02058263  | 0,031775629 |
| TP53     | 0,681947475  | 6,755413852 | 0,020692403 | 0,031937867 |
| F11R     | 0,45537607   | 9,571840053 | 0,020708141 | 0,031954924 |
| LRRC47   | 0,246119923  | 6,320531327 | 0,020732517 | 0,031985301 |
| LETM1    | 0,372965146  | 6,454215386 | 0,020744302 | 0,031996244 |
| YAP1     | -0,408364077 | 7,646351738 | 0,020879654 | 0,03219773  |
| C1orf50  | 0,335011773  | 3,328494412 | 0,021051988 | 0,03245614  |
| CHD3     | -0,416379418 | 7,670739873 | 0,021069474 | 0,032475756 |
| DDX23    | 0,200506942  | 7,462132818 | 0,021079227 | 0,032483445 |
| TRIM27   | 0,27317607   | 6,501606877 | 0,021122378 | 0,032542589 |
| FCF1     | 0,215579678  | 6,065532442 | 0,021209827 | 0,032669937 |
| AKAP8L   | 0,320097679  | 5,637233819 | 0,021273094 | 0,032759989 |
| HNRNPD   | 0,29427529   | 8,009524775 | 0,021311014 | 0,032808584 |
| PHF14    | 0,364259959  | 5,867379004 | 0,021314273 | 0,032808584 |
| RAC1     | 0,294125464  | 9,254441709 | 0,021344036 | 0,032846984 |
| MTSS1    | 0,628852337  | 6,84406326  | 0,021358226 | 0,032856712 |
| PMF1     | 0,356606316  | 5,954851616 | 0,021359995 | 0,032856712 |
| ZBTB6    | 0,325603795  | 4,501775709 | 0,021516596 | 0,033090137 |
| TMBIM1   | -0,368582175 | 8,761780009 | 0,021548518 | 0,03312578  |
| COBRA1   | 0,271241342  | 6,71811076  | 0,021549488 | 0,03312578  |
| PPIP5K2  | -0,25452723  | 5,370001469 | 0,021568563 | 0,033147629 |
| GGPS1    | 0,253324007  | 5,878058848 | 0,021643112 | 0,033254704 |
| LRCH3    | 0,36591575   | 4,876134655 | 0,021722647 | 0,033369392 |
| PTK7     | 0,435557441  | 7,930333877 | 0,02175201  | 0,033406972 |
| PTPN4    | -0,254557975 | 4,064034396 | 0,021787868 | 0,033454509 |
| STARD4   | -0,441637283 | 4,289614446 | 0,021822756 | 0,033500534 |
| RAB28    | -0,262294226 | 4,391788447 | 0,021829138 | 0,033502789 |
| HSBP1    | 0,46444457   | 7,718691178 | 0,021867955 | 0,033550254 |
| SND1     | 0,28181959   | 8,411727359 | 0,021869905 | 0,033550254 |

|           |              |             |             |             |
|-----------|--------------|-------------|-------------|-------------|
| SCD       | -0,487772091 | 9,827670003 | 0,022025387 | 0,033776758 |
| DDX58     | -0,540154891 | 5,545671924 | 0,022027459 | 0,033776758 |
| LSM14A    | 0,294569093  | 7,641852497 | 0,022038159 | 0,033785569 |
| KDM5C     | 0,325166857  | 7,266924001 | 0,022044332 | 0,033787435 |
| SMAD3     | 0,484299288  | 7,222764282 | 0,022129137 | 0,033907646 |
| ARPC1B    | -0,391702738 | 7,969344851 | 0,022132707 | 0,033907646 |
| RPS6KB1   | 0,24444008   | 5,791606819 | 0,022342819 | 0,034221852 |
| BRWD3     | 0,482043092  | 4,161786821 | 0,022353139 | 0,03422997  |
| AP2A1     | 0,304055767  | 7,185649378 | 0,022386543 | 0,034273426 |
| PEPD      | -0,304274025 | 6,71938348  | 0,022727726 | 0,034787961 |
| ZNF574    | 0,352813358  | 5,015203627 | 0,022762402 | 0,034833218 |
| FLJ42627  | -0,457050258 | 3,250229757 | 0,022831965 | 0,034928319 |
| SRP72     | 0,305549376  | 7,579129071 | 0,022834792 | 0,034928319 |
| RAB7A     | 0,272424071  | 9,050715437 | 0,023227464 | 0,035520986 |
| C17orf62  | 0,280772803  | 6,711346927 | 0,023347399 | 0,035696393 |
| MAMDC4    | 0,708845882  | 1,818737772 | 0,023371123 | 0,035724656 |
| TTC31     | 0,244955636  | 4,976694961 | 0,023385178 | 0,035738128 |
| SDF2      | 0,327208838  | 6,011892036 | 0,023419534 | 0,035782613 |
| GDE1      | -0,271861252 | 7,190672329 | 0,02344105  | 0,035803493 |
| SLC25A6   | 0,435772398  | 9,47927244  | 0,023443701 | 0,035803493 |
| TMEM87B   | 0,27245246   | 6,333818794 | 0,02348902  | 0,035864673 |
| DDB1      | 0,232304293  | 8,630496283 | 0,023533515 | 0,035924567 |
| ELL       | -0,277357042 | 4,983466743 | 0,023552589 | 0,035945637 |
| POLR3A    | 0,329921476  | 5,026266163 | 0,023560765 | 0,035950069 |
| MRP63     | 0,356821986  | 5,760643229 | 0,023617605 | 0,036028735 |
| CC2D1A    | 0,331608912  | 5,888189928 | 0,023638778 | 0,036052969 |
| AKR1A1    | 0,343375158  | 7,48964907  | 0,024073283 | 0,036707451 |
| TP53RK    | 0,310303519  | 5,215274713 | 0,024080352 | 0,03671002  |
| PLEKHA6   | -0,755648299 | 4,140232691 | 0,024146223 | 0,036789412 |
| DDB2      | 0,400836498  | 5,53270957  | 0,024147983 | 0,036789412 |
| KIAA1919  | 0,259338648  | 3,265175527 | 0,024148615 | 0,036789412 |
| KLHDC10   | -0,326730599 | 5,272283278 | 0,024210681 | 0,036875727 |
| GNL2      | 0,320991419  | 6,512413074 | 0,024226965 | 0,03689229  |
| IL15RA    | -0,450847598 | 4,782091292 | 0,024241015 | 0,036905443 |
| ERO1LB    | 0,681573745  | 4,869363292 | 0,024387545 | 0,037120238 |
| RNF115    | 0,255339859  | 5,144271138 | 0,024423395 | 0,037166511 |
| EIF4E2    | -0,237004299 | 6,655448577 | 0,024429245 | 0,037167118 |
| RPS6      | 0,537875224  | 11,31057863 | 0,024472182 | 0,037224138 |
| SPCS2     | 0,288812404  | 6,72181213  | 0,024511831 | 0,037276131 |
| IGSF8     | 0,336886503  | 6,195513832 | 0,024645196 | 0,037470589 |
| RNF219    | 0,282063588  | 4,424985669 | 0,02465357  | 0,037474965 |
| CPT1A     | -0,395237053 | 6,998975773 | 0,024674406 | 0,037498279 |
| ATF6      | -0,247395027 | 6,771386872 | 0,024727629 | 0,037570789 |
| RPAIN     | 0,338459007  | 5,364224583 | 0,024740343 | 0,037581733 |
| C14orf119 | 0,355376267  | 6,507739493 | 0,024806286 | 0,037673511 |
| CREB3L2   | -0,4099446   | 7,08263231  | 0,024842468 | 0,03772006  |
| SSPN      | -0,539856079 | 4,810576802 | 0,024856671 | 0,037733223 |
| C1GALT1   | 0,43725059   | 4,959108578 | 0,024874444 | 0,0377518   |
| ORMDL2    | 0,29961591   | 5,884506906 | 0,024913734 | 0,037803016 |
| FOXO3B    | -0,317036084 | 3,568015158 | 0,024994903 | 0,03791774  |

|              |              |             |             |             |
|--------------|--------------|-------------|-------------|-------------|
| TMSB10       | 0,502689059  | 10,57323953 | 0,025163011 | 0,038164273 |
| SYAP1        | 0,324117556  | 6,178271669 | 0,025201934 | 0,038214808 |
| AMPD3        | 0,443085541  | 4,64963533  | 0,02522911  | 0,03824751  |
| LOC100271836 | 0,320751833  | 4,289346159 | 0,0253301   | 0,038392076 |
| HERPUD2      | -0,220272203 | 5,729457187 | 0,025353507 | 0,038419014 |
| SMARCC2      | -0,26857837  | 7,1945212   | 0,025403362 | 0,038486009 |
| RPLP2        | 0,367035311  | 9,628652183 | 0,025496154 | 0,038618008 |
| ZMAT2        | -0,196868747 | 6,692073222 | 0,025518402 | 0,038643124 |
| IMPDH1       | 0,406216829  | 6,742390734 | 0,02554392  | 0,038673177 |
| ZNF148       | 0,305945142  | 6,51310862  | 0,025554641 | 0,038680821 |
| AATF         | 0,303364581  | 6,478939747 | 0,025656086 | 0,038825754 |
| EXOC6B       | 0,456319224  | 4,53374952  | 0,025724723 | 0,038920986 |
| ATMIN        | 0,237881958  | 6,664952146 | 0,025792596 | 0,039009613 |
| KIF3B        | -0,284418414 | 6,624317742 | 0,025794742 | 0,039009613 |
| TSC2         | -0,339166179 | 6,389252736 | 0,025805637 | 0,039017437 |
| SLC11A2      | -0,257903809 | 6,668613009 | 0,025845741 | 0,03906941  |
| SF3A1        | -0,234169228 | 7,788786351 | 0,025871639 | 0,03909989  |
| MED24        | -0,274439422 | 6,564060941 | 0,025997744 | 0,039281768 |
| CEP192       | 0,342220332  | 5,284568903 | 0,026023079 | 0,039311338 |
| SDAD1        | 0,282633643  | 5,960212083 | 0,026083555 | 0,039393967 |
| ZADH2        | -0,314679453 | 5,420806774 | 0,026111286 | 0,039427117 |
| DGAT1        | 0,370488823  | 5,805601457 | 0,026205984 | 0,039561348 |
| UBE2H        | 0,377445341  | 6,836653386 | 0,026214134 | 0,039564892 |
| MOSPD3       | 0,389059102  | 4,537008215 | 0,026356467 | 0,039770912 |
| SEPT9        | 0,304928157  | 8,789066796 | 0,026444274 | 0,039894581 |
| C9orf123     | 0,475518745  | 5,68458023  | 0,026505704 | 0,039978411 |
| CHIC2        | 0,651752794  | 4,995665502 | 0,026703015 | 0,040267108 |
| TTBK2        | -0,412471592 | 3,020179759 | 0,027029095 | 0,040749811 |
| MAPRE1       | 0,244912607  | 7,962466286 | 0,027081654 | 0,040820027 |
| RCN1         | 0,387772051  | 7,815833158 | 0,02710451  | 0,040837001 |
| PPWD1        | -0,21927299  | 4,544098629 | 0,027104893 | 0,040837001 |
| PLCB3        | 0,369061045  | 6,00292985  | 0,027144952 | 0,04088832  |
| DNAJC11      | 0,249629472  | 5,892047384 | 0,027164583 | 0,040908854 |
| THAP1        | 0,291651098  | 3,977865594 | 0,027203372 | 0,040958223 |
| BPGM         | 0,426683504  | 5,592306539 | 0,027220967 | 0,040975667 |
| IDE          | 0,287524123  | 5,453092254 | 0,027296949 | 0,041080975 |
| UBR4         | -0,294796648 | 7,64059569  | 0,027307942 | 0,041088451 |
| COQ6         | 0,317348576  | 4,412218669 | 0,027338862 | 0,041125899 |
| POLR1E       | 0,363007353  | 4,975649383 | 0,027420924 | 0,041240247 |
| AP3S1        | 0,318512287  | 6,094702651 | 0,027442689 | 0,04126388  |
| HEATR3       | 0,259118994  | 4,681371726 | 0,027553772 | 0,041418911 |
| AGPAT1       | -0,267345001 | 6,747581856 | 0,027557941 | 0,041418911 |
| ZNF808       | -0,392641424 | 3,772242065 | 0,027605452 | 0,041481176 |
| GLOD4        | 0,239983977  | 6,330221465 | 0,027764462 | 0,04171092  |
| HNRNPH1      | 0,240388588  | 8,245597481 | 0,02779961  | 0,041754524 |
| VPS29        | 0,369456489  | 6,623327749 | 0,027838316 | 0,041803453 |
| JRKL         | 0,32688333   | 4,391993633 | 0,027857529 | 0,041823094 |
| FAM53C       | -0,229258555 | 6,039519599 | 0,027983462 | 0,042002911 |
| MAGT1        | 0,342373461  | 7,998205751 | 0,028003169 | 0,042023241 |
| TAB2         | -0,226510533 | 7,079074359 | 0,028067913 | 0,042111133 |

|          |              |             |             |             |
|----------|--------------|-------------|-------------|-------------|
| NARS2    | 0,400956676  | 5,021231254 | 0,02810704  | 0,04216056  |
| DIDO1    | -0,272729029 | 6,335139812 | 0,02817299  | 0,042250191 |
| ZNF414   | 0,391160186  | 3,498404184 | 0,028197046 | 0,042276969 |
| DUSP10   | 0,518522773  | 5,040999644 | 0,028221383 | 0,042304157 |
| BCL2L13  | 0,318255465  | 6,719345854 | 0,028480044 | 0,04268251  |
| SMAD1    | 0,362954944  | 5,862915777 | 0,028534769 | 0,042755129 |
| RFFL     | 0,36594689   | 6,12145408  | 0,028547013 | 0,042764078 |
| OR2A9P   | -0,471616282 | 3,864676576 | 0,028580985 | 0,042805565 |
| RIF1     | 0,321172545  | 5,772980814 | 0,028618084 | 0,042851716 |
| DDX41    | 0,235419797  | 6,27641746  | 0,028663262 | 0,042909942 |
| NGFRAP1  | 0,409285259  | 7,217359582 | 0,028684307 | 0,042932022 |
| ARID1B   | -0,287713635 | 6,638555006 | 0,028850096 | 0,043170683 |
| TTC3     | -0,319421168 | 7,470211769 | 0,028914063 | 0,043256911 |
| DEAF1    | 0,343069129  | 5,055103743 | 0,029008688 | 0,043388955 |
| SLC6A6   | -0,418721865 | 6,931203043 | 0,02908596  | 0,043494991 |
| AFTPH    | 0,270776136  | 6,674633422 | 0,029144937 | 0,04357363  |
| MRPS36   | -0,349990572 | 4,432276389 | 0,029182103 | 0,043619631 |
| KIAA0947 | 0,348290869  | 6,44062992  | 0,029275273 | 0,043749306 |
| PRPS1    | 0,433399732  | 6,328938537 | 0,029371847 | 0,04388401  |
| RAI14    | 0,643892618  | 7,821707671 | 0,029415677 | 0,043939868 |
| GAK      | -0,353227801 | 6,445840786 | 0,029433153 | 0,043956345 |
| KIAA0556 | -0,389825561 | 4,933509386 | 0,029443639 | 0,043962377 |
| BPTF     | -0,310442282 | 6,565657529 | 0,029461398 | 0,043979263 |
| FBXL20   | 0,347271919  | 3,669447954 | 0,029502579 | 0,044031097 |
| METTL10  | 0,321718046  | 4,094154599 | 0,029803175 | 0,044469989 |
| MGEA5    | -0,247218303 | 7,117840605 | 0,029856727 | 0,044540149 |
| ACTG1    | 0,270227286  | 12,26803944 | 0,029874184 | 0,044556444 |
| UQCRC2   | 0,300552794  | 7,82564855  | 0,029958373 | 0,044672238 |
| MOV10    | 0,324077635  | 6,137367762 | 0,030135623 | 0,044926719 |
| ADII     | 0,491466443  | 7,545115558 | 0,030160467 | 0,044953928 |
| RPS6KA4  | 0,354703717  | 6,108670525 | 0,030186605 | 0,044983056 |
| HGSNAT   | -0,332235618 | 6,996595896 | 0,030197071 | 0,04498882  |
| OSBPL3   | 0,389718448  | 5,56519729  | 0,030271766 | 0,045090252 |
| SUGT1    | 0,289814879  | 5,285159029 | 0,030569366 | 0,045523587 |
| RPL19    | 0,3111031    | 10,41751966 | 0,030606766 | 0,045569331 |
| MAPKBP1  | 0,4471204    | 5,634597986 | 0,030658799 | 0,045636837 |
| HSPA7    | 0,670488619  | 3,212945557 | 0,030711328 | 0,045705051 |
| KIAA2013 | 0,246089471  | 6,626529253 | 0,030724367 | 0,045714479 |
| ANKRD36B | 0,437989272  | 2,856234147 | 0,03095696  | 0,046050504 |
| MAT2B    | -0,268487398 | 6,841192824 | 0,03119019  | 0,046387329 |
| SNX11    | 0,295254698  | 5,648540048 | 0,031300949 | 0,046541904 |
| ATP6V0B  | 0,487927384  | 7,739496375 | 0,031387283 | 0,046660101 |
| NPRL2    | 0,318220266  | 4,375388163 | 0,03148136  | 0,046789754 |
| ISOC1    | -0,304961091 | 4,873389008 | 0,031522402 | 0,046840544 |
| CUX1     | -0,307183085 | 7,109346422 | 0,031619599 | 0,046974738 |
| WAC      | -0,213158616 | 7,464383898 | 0,031873368 | 0,047341428 |
| GHITM    | 0,301529114  | 8,229070651 | 0,031951635 | 0,04744195  |
| SUPT16H  | 0,308978346  | 7,637560054 | 0,031954961 | 0,04744195  |
| ARHGAP5  | -0,285024928 | 6,825587807 | 0,032068147 | 0,047599629 |
| COL5A1   | 0,815527501  | 8,913800307 | 0,032165894 | 0,047734326 |

|          |              |             |             |             |
|----------|--------------|-------------|-------------|-------------|
| ASS1     | 0,825863626  | 7,761694961 | 0,032350914 | 0,047998451 |
| CNST     | -0,251046368 | 5,622265695 | 0,032421932 | 0,048093355 |
| ALKBH1   | 0,269905537  | 4,077618067 | 0,032443161 | 0,048114379 |
| DAD1     | 0,330321146  | 7,48861714  | 0,032479321 | 0,048157532 |
| SIPA1L3  | 0,487103741  | 6,719013593 | 0,032863017 | 0,048715851 |
| PAN3     | -0,255794268 | 5,473782765 | 0,033061038 | 0,048998743 |
| UBE4B    | 0,308164505  | 6,54532807  | 0,033127208 | 0,049086143 |
| KDSR     | -0,248345263 | 6,744640667 | 0,033181653 | 0,049156136 |
| PPT2     | 0,342808757  | 4,718567716 | 0,033256338 | 0,049256075 |
| RPL23A   | 0,322449256  | 10,04386415 | 0,033286523 | 0,049290077 |
| TRNP1    | -0,619548099 | 3,593901605 | 0,033375194 | 0,049410648 |
| CFL1     | 0,229478568  | 10,2087824  | 0,03345725  | 0,049521377 |
| ZNF124   | 0,338111734  | 2,858253058 | 0,033548404 | 0,049642943 |
| NFATC2IP | 0,259832755  | 5,81716876  | 0,033553941 | 0,049642943 |
| MCFD2    | -0,257056921 | 7,601999964 | 0,033586512 | 0,049680353 |
| CNOT7    | 0,283571179  | 6,870639441 | 0,03361883  | 0,049717372 |
| AGGF1    | -0,196472812 | 5,404789604 | 0,033699523 | 0,0498259   |
| MKNK1    | -0,256368842 | 5,508030539 | 0,033709318 | 0,049829577 |
| METAP2   | 0,188847437  | 7,267570974 | 0,033927777 | 0,050141637 |
| USP35    | 0,406726011  | 3,411724264 | 0,033987109 | 0,050218439 |
| MEIS2    | -0,509807818 | 4,444970735 | 0,034153172 | 0,050452877 |
| CMC1     | 0,386948471  | 4,09632086  | 0,034180733 | 0,050480868 |
| FAM35A   | -0,254389013 | 5,325393967 | 0,034186926 | 0,050480868 |
| PTP4A3   | -0,417726202 | 5,776481567 | 0,034243939 | 0,050554107 |
| ANKRD52  | 0,331610807  | 6,400638958 | 0,034268891 | 0,050579994 |
| EWSR1    | 0,218976495  | 8,213535125 | 0,034379595 | 0,050732408 |
| ZDHHC8   | 0,373858424  | 5,736490789 | 0,034442226 | 0,050813834 |
| CAP1     | -0,316994212 | 9,104369685 | 0,034506641 | 0,050897855 |
| NPR3     | -0,759936374 | 3,798744365 | 0,034542604 | 0,050939882 |
| MSL2     | 0,309407949  | 6,04328297  | 0,0346819   | 0,051134243 |
| ZNF28    | 0,453045054  | 4,84817151  | 0,034748399 | 0,051221213 |
| CMPK1    | -0,261279522 | 7,684174322 | 0,034801157 | 0,051287895 |
| KIAA1429 | 0,22503599   | 6,58458964  | 0,034934453 | 0,051473214 |
| PATL1    | 0,268810779  | 6,635646831 | 0,035113178 | 0,051724493 |
| EGLN2    | -0,360145674 | 6,795625273 | 0,035120165 | 0,051724493 |
| ZBTB25   | 0,293629372  | 2,984707729 | 0,035360689 | 0,052067488 |
| NOMO2    | 0,333674516  | 7,902973862 | 0,035424557 | 0,052150271 |
| MUM1     | -0,254928268 | 5,130236418 | 0,035479052 | 0,052219222 |
| GTF3C4   | 0,352446401  | 5,096907842 | 0,035588693 | 0,052369292 |
| ARL17A   | 0,441317449  | 4,31443934  | 0,035602092 | 0,052377705 |
| CIB1     | 0,41044615   | 7,568585466 | 0,035932083 | 0,052851785 |
| PPP2R2A  | 0,294507548  | 6,427097335 | 0,036029341 | 0,052983411 |
| C4orf27  | 0,308583026  | 4,639839714 | 0,036041679 | 0,052990126 |
| ETV5     | -0,542708011 | 6,558750036 | 0,036076399 | 0,053029741 |
| TAP1     | 0,575592659  | 8,382776834 | 0,036195748 | 0,053193709 |
| DYNLL2   | -0,280530149 | 6,524924545 | 0,036216826 | 0,053213216 |
| CAPN7    | -0,210064268 | 5,310065698 | 0,036427117 | 0,053510665 |
| MED12    | -0,308893085 | 6,136578264 | 0,036536743 | 0,053660144 |
| MRPS18B  | 0,299378517  | 6,578212614 | 0,03660704  | 0,05375181  |
| ACADVL   | -0,236732663 | 7,841837887 | 0,036624182 | 0,053765403 |



|          |              |             |             |             |
|----------|--------------|-------------|-------------|-------------|
| MGC2752  | -0,21778304  | 5,597872947 | 0,036792095 | 0,054000279 |
| GTPBP2   | 0,292674245  | 6,225739614 | 0,036820439 | 0,054030251 |
| KIAA1430 | -0,257787163 | 5,960434311 | 0,036846103 | 0,054056276 |
| TUT1     | 0,242341656  | 5,054232486 | 0,036859466 | 0,054064249 |
| GRPEL1   | 0,269601102  | 5,587023607 | 0,036983623 | 0,054234694 |
| RAB3GAP2 | 0,211157017  | 6,143859931 | 0,037011217 | 0,05426349  |
| ATG2A    | -0,310396891 | 5,54479984  | 0,037049144 | 0,054307419 |
| CNOT6    | -0,228859264 | 5,880828534 | 0,037077297 | 0,054337006 |
| PANX1    | 0,326821225  | 5,356888971 | 0,037135757 | 0,054410985 |
| PGRMC1   | 0,323570842  | 7,724945776 | 0,037197309 | 0,054489463 |
| SLC25A44 | -0,217202685 | 5,925639471 | 0,03724102  | 0,054541777 |
| KLHL23   | 0,518140164  | 3,664969327 | 0,037294797 | 0,054602672 |
| CDC27    | 0,224677495  | 6,742652106 | 0,037298614 | 0,054602672 |
| GCFC1    | 0,300562863  | 4,930964446 | 0,037458201 | 0,054824527 |
| LAMB1    | -0,470923181 | 8,045132273 | 0,037568369 | 0,054973972 |
| SLC25A46 | -0,258060951 | 5,295263864 | 0,037592305 | 0,054997196 |
| OTUD7B   | -0,313488895 | 5,588582987 | 0,037605659 | 0,05500493  |
| SHKBP1   | 0,362529209  | 6,848987569 | 0,03766906  | 0,055085851 |
| CSNK2A2  | 0,26672312   | 5,478732336 | 0,037678787 | 0,055088261 |
| MAP1S    | -0,302452932 | 5,593881772 | 0,037736898 | 0,055161394 |
| C12orf57 | 0,444477833  | 6,844913674 | 0,037747224 | 0,055164663 |
| PLTP     | 0,555084835  | 8,324872109 | 0,037795559 | 0,055223466 |
| HCLS1    | -0,533569412 | 6,797704099 | 0,037823147 | 0,055251937 |
| ARFIP2   | 0,286271021  | 6,15195352  | 0,038069021 | 0,055598584 |
| ANKRD11  | -0,28700914  | 7,107879134 | 0,038076754 | 0,055598584 |
| NEDD8    | 0,298270615  | 7,161448726 | 0,038104548 | 0,055627256 |
| SMC5     | -0,262021165 | 5,726726697 | 0,038222989 | 0,055788219 |
| NDUFAF2  | 0,36082085   | 4,143524861 | 0,038267165 | 0,055840744 |
| CTNNB1   | -0,26687544  | 9,359995856 | 0,038538337 | 0,056224417 |
| SNX8     | 0,356931509  | 5,32018578  | 0,038576881 | 0,056268609 |
| GNAI1    | 0,461524342  | 5,974574449 | 0,038814029 | 0,056602409 |
| AEBP1    | -0,57070904  | 8,766179991 | 0,038861673 | 0,056659772 |
| NDUFB1   | 0,436701907  | 5,821471397 | 0,038987477 | 0,056831039 |
| GLT8D1   | -0,198483714 | 5,75923372  | 0,039036892 | 0,05689091  |
| TTC30B   | 0,385609999  | 3,998371441 | 0,039105579 | 0,056978834 |
| RNF103   | -0,224951129 | 5,668702924 | 0,039129053 | 0,057000857 |
| CALM3    | -0,234091345 | 8,257557431 | 0,039255376 | 0,057172663 |
| TPT1     | -0,388434777 | 11,98368405 | 0,039444316 | 0,057435573 |
| GTF2H1   | 0,257808091  | 6,031347092 | 0,039471405 | 0,057462748 |
| AHR      | -0,396523334 | 8,203522222 | 0,039513828 | 0,057512229 |
| ETV6     | 0,359481128  | 6,488670816 | 0,039546983 | 0,057548203 |
| ING2     | -0,291591337 | 3,712434146 | 0,039799829 | 0,057903783 |
| UBTD2    | -0,234548965 | 5,400768766 | 0,04007997  | 0,058298916 |
| MESDC2   | 0,20714748   | 6,677898969 | 0,040095272 | 0,058308735 |
| CORO1B   | 0,262775429  | 7,075524798 | 0,040170625 | 0,058405862 |
| UXS1     | -0,263460597 | 6,538023915 | 0,040309925 | 0,058595902 |
| USP9X    | -0,266879779 | 7,635736952 | 0,040385997 | 0,058693971 |
| TPRG1L   | -0,279498203 | 6,657532833 | 0,040427596 | 0,058741909 |
| BIRC6    | -0,254037484 | 6,886098784 | 0,040594884 | 0,058972414 |
| PIGH     | 0,263986775  | 4,690160157 | 0,040617172 | 0,058992225 |

|          |              |              |             |             |
|----------|--------------|--------------|-------------|-------------|
| ATG12    | 0,247190118  | 5,193233183  | 0,040688081 | 0,059082628 |
| MED18    | 0,294053699  | 4,763970819  | 0,040706326 | 0,059083503 |
| GLE1     | 0,278306282  | 6,069285554  | 0,040713976 | 0,059083503 |
| MAP3K5   | -0,328320529 | 5,877128732  | 0,040714677 | 0,059083503 |
| VKORC1L1 | -0,256386279 | 6,709358882  | 0,040865237 | 0,059289373 |
| CLN6     | 0,308132446  | 6,181678297  | 0,041067068 | 0,059563878 |
| ELMOD3   | 0,257964916  | 4,167917665  | 0,04107191  | 0,059563878 |
| FXN      | 0,259360353  | 4,32896981   | 0,041098519 | 0,059577067 |
| SARNP    | 0,267074019  | 5,824353903  | 0,041103199 | 0,059577067 |
| RFT1     | 0,192308154  | 5,281267575  | 0,041107215 | 0,059577067 |
| SDCCAG8  | -0,289698315 | 5,350356973  | 0,041139385 | 0,059611021 |
| SLC41A3  | 0,273487336  | 6,195547028  | 0,041470387 | 0,060077878 |
| ITCH     | 0,222761343  | 6,785212275  | 0,041494399 | 0,060087586 |
| TYMP     | 0,605626438  | 7,720641668  | 0,041494712 | 0,060087586 |
| RAB5C    | -0,198084007 | 7,752230746  | 0,041572439 | 0,060176307 |
| ASCC3    | 0,349868936  | 6,403077142  | 0,04157363  | 0,060176307 |
| FASTKD2  | 0,206374195  | 6,051603717  | 0,041671944 | 0,060305811 |
| FN3K     | -0,397984643 | 4,14314422   | 0,041767794 | 0,060431697 |
| RP9P     | 0,318389554  | 3,648654368  | 0,042021836 | 0,06078636  |
| GOLGB1   | -0,302941066 | 7,369287587  | 0,042041982 | 0,060802604 |
| DEF6     | 0,310846714  | 5,054973622  | 0,042058635 | 0,060813789 |
| TNPO3    | 0,275730013  | 6,359923746  | 0,042172928 | 0,060966122 |
| SEC61B   | 0,273224595  | 6,56614377   | 0,042264216 | 0,06108514  |
| TNPO1    | 0,311773124  | 7,522675653  | 0,04227831  | 0,061092561 |
| GMFB     | -0,270448732 | 6,700419809  | 0,042423922 | 0,061289983 |
| NAT14    | 0,450274653  | 4,14544064   | 0,042689566 | 0,061660696 |
| ATRN     | 0,386961862  | 7,282120731  | 0,042785601 | 0,061786322 |
| ECHDC2   | -0,384962038 | 4,941915198  | 0,042958187 | 0,062022418 |
| PPIL2    | 0,28342599   | 6,073204199  | 0,043017482 | 0,06209488  |
| CEP135   | 0,372951978  | 4,246986809  | 0,043114872 | 0,062222289 |
| SNHG5    | 0,602776275  | 6,964337855  | 0,043210252 | 0,062346743 |
| MON2     | -0,189314482 | 5,739250518  | 0,043297848 | 0,062459917 |
| DCTN6    | -0,27121911  | 5,04928799   | 0,043326104 | 0,062487458 |
| LRP11    | 0,400828917  | 6,407460028  | 0,043336519 | 0,062489263 |
| PCDHB19P | -0,274058125 | -0,063854865 | 0,043379376 | 0,062537836 |
| DDX50    | 0,218825946  | 5,99525992   | 0,043491516 | 0,06268625  |
| DIP2A    | -0,262127931 | 5,340036389  | 0,043764763 | 0,06306363  |
| PRSS23   | -0,502649131 | 7,433787398  | 0,043771838 | 0,06306363  |
| NBAS     | -0,23701589  | 6,143514852  | 0,043793669 | 0,063081755 |
| CTTN     | 0,520809288  | 8,409063037  | 0,043843631 | 0,063140384 |
| SLC25A32 | 0,221971143  | 5,794319906  | 0,043883953 | 0,063185109 |
| UBAP2    | 0,378119109  | 6,226666713  | 0,044041339 | 0,063398331 |
| ANKH     | 0,538398524  | 6,958567471  | 0,044212945 | 0,063631928 |
| USP22    | -0,343773187 | 8,075552521  | 0,044243332 | 0,063662224 |
| SPATA7   | -0,349025163 | 3,021713195  | 0,044318128 | 0,063756396 |
| DPM2     | 0,255681218  | 5,93033772   | 0,044514688 | 0,064019283 |
| ARPC3    | 0,285617184  | 8,513761383  | 0,044519642 | 0,064019283 |
| NFU1     | 0,339667826  | 5,384418526  | 0,044729559 | 0,064307583 |
| CCDC12   | -0,213886086 | 5,042230709  | 0,044753101 | 0,064327866 |
| PGAP3    | -0,369731807 | 5,558223315  | 0,044892706 | 0,064514934 |

|          |              |             |             |             |
|----------|--------------|-------------|-------------|-------------|
| SENP6    | -0,223688716 | 6,47777517  | 0,044925737 | 0,064548799 |
| FBN1     | -0,583978108 | 7,389352276 | 0,044953468 | 0,064575037 |
| METTL3   | 0,276388307  | 5,257593359 | 0,04540428  | 0,065208886 |
| TFIP11   | 0,237505984  | 6,123559086 | 0,045639531 | 0,065532946 |
| ADAM17   | 0,371811615  | 6,864756771 | 0,045673982 | 0,065568607 |
| STRADA   | 0,201878721  | 5,350696303 | 0,045721689 | 0,065623279 |
| CLIC6    | -0,693105221 | 5,59146029  | 0,045802906 | 0,065726013 |
| PHF10    | -0,250567811 | 6,273962704 | 0,045952958 | 0,065927461 |
| NDUFA3   | 0,344057484  | 5,265776951 | 0,046024028 | 0,066015534 |
| EP300    | -0,289181447 | 7,281853273 | 0,046047189 | 0,066034865 |
| HSPA6    | 0,763329214  | 4,774191937 | 0,046060744 | 0,066040414 |
| LYAR     | 0,305512621  | 4,882795842 | 0,046123462 | 0,066116436 |
| RPS11    | 0,334412112  | 10,79764488 | 0,046229412 | 0,066254384 |
| VCIPI1   | -0,211855083 | 5,356906149 | 0,046269475 | 0,066297867 |
| LRP5     | -0,318192388 | 6,900662268 | 0,046589431 | 0,066742297 |
| NIPA2    | 0,211020249  | 6,373416433 | 0,046619307 | 0,066771068 |
| DDHD2    | 0,515888135  | 6,377293789 | 0,046665939 | 0,066823822 |
| NUP153   | 0,261471627  | 6,855430404 | 0,047125444 | 0,067467647 |
| C3orf52  | -0,382063621 | 4,052796381 | 0,047165963 | 0,067511482 |
| RXRA     | -0,375439304 | 7,04095137  | 0,047193086 | 0,067536129 |
| USP30    | -0,215218618 | 4,404417076 | 0,047206113 | 0,067540596 |
| MSRB2    | -0,308097928 | 4,725142862 | 0,047484425 | 0,067924543 |
| TJAP1    | 0,235287517  | 5,449243262 | 0,047526667 | 0,067970709 |
| TAF9     | 0,268685513  | 6,234412064 | 0,047564952 | 0,0680112   |
| RAP2C    | 0,23673862   | 5,955512892 | 0,047575762 | 0,068012395 |
| C19orf10 | 0,289559404  | 7,018373055 | 0,047840821 | 0,068376977 |
| ZNF880   | -0,56862816  | 2,774148996 | 0,047927031 | 0,068485839 |
| DNAJA2   | 0,245536251  | 6,942765439 | 0,048086586 | 0,06869944  |
| CDK10    | 0,328050613  | 5,315802816 | 0,048111792 | 0,068721053 |
| KCTD3    | 0,278906288  | 6,415955321 | 0,048156279 | 0,068770192 |
| LMF2     | 0,31542242   | 6,72950538  | 0,048324163 | 0,068995491 |
| TM2D1    | 0,332161274  | 5,20054959  | 0,048344201 | 0,069009652 |
| C6orf226 | 0,405704291  | 2,524443619 | 0,048366311 | 0,069026763 |
| MTIF3    | -0,222813852 | 4,982880272 | 0,048515867 | 0,069225716 |
| THY1     | 0,580530999  | 7,436918671 | 0,048660106 | 0,069417001 |
| DGCR8    | 0,249761956  | 5,544947065 | 0,04871777  | 0,069484726 |
| PARK7    | 0,248746606  | 7,823093527 | 0,048766873 | 0,069540215 |
| RPS28    | 0,379477208  | 8,997697711 | 0,048815223 | 0,069594607 |
| CCDC25   | -0,228603189 | 5,585993915 | 0,04906486  | 0,069921853 |
| FAM98B   | 0,28121908   | 4,694001264 | 0,049065269 | 0,069921853 |
| PDGFRA   | -0,573702194 | 6,630523043 | 0,049140055 | 0,070010465 |
| SSR2     | 0,309450764  | 8,646627108 | 0,049147983 | 0,070010465 |
| N6AMT1   | -0,311934589 | 3,442700632 | 0,049160446 | 0,070013593 |
| MRPL33   | 0,337833655  | 5,599123258 | 0,049250638 | 0,070127396 |
| DCP1B    | -0,36599131  | 3,931856821 | 0,049529694 | 0,070510017 |
| RNMT     | 0,26178439   | 6,132787192 | 0,049639259 | 0,070651243 |
| BNIP3L   | -0,287026705 | 7,583925469 | 0,049691811 | 0,070711281 |
| TMEM160  | 0,435581271  | 2,652895942 | 0,049827243 | 0,070876864 |
| NUCKS1   | 0,248667086  | 9,055266254 | 0,049828961 | 0,070876864 |
| FYB      | -0,549394064 | 5,49078856  | 0,05000534  | 0,071102202 |

|          |              |             |             |             |
|----------|--------------|-------------|-------------|-------------|
| TRIM24   | 0,36788174   | 5,876611089 | 0,050008236 | 0,071102202 |
| SLC30A9  | -0,24804747  | 6,396681015 | 0,050060692 | 0,071161946 |
| RECQL    | 0,272575358  | 6,113181877 | 0,050108621 | 0,071215233 |
| ASB8     | -0,172221027 | 5,290254357 | 0,050221168 | 0,071360313 |
| CHKB     | 0,367168609  | 4,290440393 | 0,050448753 | 0,071668759 |
| ZBTB7A   | -0,260906105 | 5,586186286 | 0,050523297 | 0,071759709 |
| C12orf23 | 0,364220025  | 6,410713768 | 0,050676816 | 0,071962767 |
| ING3     | -0,268081245 | 4,098167975 | 0,050853554 | 0,072184242 |
| DICER1   | -0,245023564 | 6,535288882 | 0,050853952 | 0,072184242 |
| CIAO1    | 0,20277711   | 6,945746584 | 0,051054741 | 0,072454169 |
| PDCD7    | 0,203136783  | 5,037411269 | 0,051119562 | 0,072531064 |
| ABCA5    | 0,470622498  | 4,845767738 | 0,051171611 | 0,072589809 |
| BCAT1    | -0,544154589 | 6,404315303 | 0,051305209 | 0,072764189 |
| CLK1     | -0,310790862 | 6,011419306 | 0,051447835 | 0,072936717 |
| SLC25A38 | -0,22692653  | 5,326387301 | 0,051448249 | 0,072936717 |
| TKT      | 0,448098995  | 9,262942653 | 0,051498523 | 0,072992814 |
| NDUFB8   | 0,322925692  | 5,768341023 | 0,051787627 | 0,073387329 |
| FTL      | -0,425135893 | 12,75689445 | 0,051844644 | 0,073452862 |
| PPOX     | 0,359664881  | 4,06263528  | 0,051973088 | 0,073619545 |
| C19orf6  | 0,253925208  | 7,018754909 | 0,052184394 | 0,073903507 |
| TNFAIP2  | 0,572458542  | 7,602033995 | 0,052343101 | 0,074112874 |
| CYFIP1   | -0,219630089 | 7,837100374 | 0,052447128 | 0,074244751 |
| RBM23    | -0,19364505  | 6,662119174 | 0,05249326  | 0,074294633 |
| ACOT13   | 0,318950385  | 5,651403476 | 0,052615899 | 0,074452752 |
| IL32     | -0,559515525 | 7,417615649 | 0,05287034  | 0,074797271 |
| ATP5A1   | 0,312039628  | 9,338840093 | 0,053069645 | 0,075063661 |
| PIM2     | 0,58854656   | 6,713620032 | 0,053193914 | 0,075223829 |
| HNRNPUL1 | 0,280442436  | 8,827860933 | 0,053359743 | 0,075442688 |
| PRRC1    | -0,185898658 | 6,525771463 | 0,053427615 | 0,07552299  |
| KIAA0368 | -0,261748152 | 7,153994962 | 0,053456438 | 0,075548073 |
| STAT1    | 0,451196698  | 9,069781578 | 0,053616971 | 0,075759248 |
| PNP      | -0,375257567 | 6,604703024 | 0,053693681 | 0,075851919 |
| EEF1D    | 0,288176478  | 8,986011134 | 0,054192721 | 0,076541045 |
| AKR1B1   | 0,475898796  | 7,443396859 | 0,054259316 | 0,076619233 |
| APOBEC3G | 0,521063263  | 5,289307572 | 0,054448593 | 0,076870591 |
| DHX16    | 0,211632471  | 5,983991437 | 0,054576068 | 0,077034612 |
| SNTA1    | 0,445506184  | 4,774143057 | 0,055045566 | 0,077681232 |
| CCS      | 0,269710565  | 4,90149981  | 0,055239609 | 0,077938939 |
| SMARCA1  | -0,388704324 | 5,885375376 | 0,05527876  | 0,077978044 |
| DENND1A  | 0,27265992   | 5,407864504 | 0,055433091 | 0,078179575 |
| GSK3B    | 0,279281639  | 6,939999963 | 0,055500365 | 0,078252237 |
| FEM1B    | 0,253782367  | 7,170425957 | 0,055507563 | 0,078252237 |
| COPB1    | 0,31876751   | 8,043560197 | 0,055578198 | 0,07833562  |
| REXO2    | 0,25928607   | 6,039462349 | 0,055844    | 0,078693994 |
| HIC2     | 0,484786856  | 3,741382721 | 0,056041925 | 0,078956589 |
| NUP214   | -0,252507046 | 6,485357759 | 0,056140227 | 0,079078746 |
| RB1CC1   | 0,348503158  | 6,927081936 | 0,05618283  | 0,079122411 |
| PIGM     | 0,264353012  | 4,855213489 | 0,056351609 | 0,079343718 |
| CLPX     | 0,193093851  | 5,703487644 | 0,05719906  | 0,080520311 |
| SEPT8    | -0,243628484 | 6,191072983 | 0,057296571 | 0,080640933 |

|          |              |             |             |             |
|----------|--------------|-------------|-------------|-------------|
| HK1      | 0,351943029  | 8,323486884 | 0,057693131 | 0,081182307 |
| PPIC     | 0,35362396   | 6,144104274 | 0,057907818 | 0,08146759  |
| ZHX1     | -0,249806317 | 5,701493158 | 0,058181211 | 0,08183533  |
| DPYSL3   | -0,43249918  | 8,129920041 | 0,058210913 | 0,081857909 |
| ZBTB45   | 0,277274574  | 4,126830652 | 0,058221273 | 0,081857909 |
| VPS26A   | 0,242507561  | 6,949009463 | 0,058260479 | 0,081896146 |
| POLR2L   | -0,274423454 | 6,501804987 | 0,058333681 | 0,081982145 |
| STAU1    | 0,2025075    | 7,811514958 | 0,058410211 | 0,082072786 |
| FXYD5    | -0,43125652  | 7,036460839 | 0,058515    | 0,082194813 |
| ZNF460   | 0,369870644  | 2,409929954 | 0,058521164 | 0,082194813 |
| TOR1AIP2 | -0,210774022 | 5,204963116 | 0,058740743 | 0,082486229 |
| USP40    | -0,279752751 | 5,702539338 | 0,059080499 | 0,082946248 |
| PUM2     | 0,195260902  | 7,82979451  | 0,059138096 | 0,08301002  |
| NT5C3    | 0,304875601  | 5,330075728 | 0,059195521 | 0,083073525 |
| SORL1    | 0,542081358  | 7,665197434 | 0,059258841 | 0,083145275 |
| DYNLT3   | 0,458615108  | 6,291182576 | 0,059293015 | 0,083176109 |
| CDC16    | -0,198115743 | 6,050841217 | 0,059567413 | 0,083543849 |
| SEC23IP  | -0,185345301 | 6,068865213 | 0,059669606 | 0,083669966 |
| DAP      | 0,310713367  | 8,046914008 | 0,060003927 | 0,084121459 |
| RIPK2    | -0,298725167 | 5,076336168 | 0,06024834  | 0,084446748 |
| NDUFB2   | 0,312115089  | 6,470076585 | 0,060277193 | 0,084469828 |
| SMG5     | 0,247173079  | 7,216465721 | 0,060308504 | 0,08449634  |
| GOLPH3L  | 0,298132634  | 5,941838921 | 0,060334522 | 0,084515429 |
| OLFML2A  | -0,469986109 | 5,886044647 | 0,060594862 | 0,084848735 |
| SBF1     | 0,341073164  | 6,913200104 | 0,060597352 | 0,084848735 |
| DHPS     | 0,290304906  | 5,85759437  | 0,060877842 | 0,085223979 |
| TGFB1    | -0,334320466 | 7,022701599 | 0,060942858 | 0,085297485 |
| FDX1     | -0,255334824 | 5,31889802  | 0,060957536 | 0,085300521 |
| MAPKAPK2 | -0,207048622 | 7,880828078 | 0,061105463 | 0,085489978 |
| MPST     | 0,331106797  | 6,246365526 | 0,061184921 | 0,085583585 |
| TATDN3   | 0,221664502  | 4,774273918 | 0,061205571 | 0,085594912 |
| RCAN3    | 0,286861912  | 3,533244814 | 0,061248606 | 0,085637532 |
| IRS1     | 0,565118501  | 5,83289887  | 0,061309308 | 0,085704832 |
| IDH3G    | 0,199645438  | 6,064080214 | 0,061720693 | 0,086262228 |
| ZNF506   | -0,337577099 | 4,35554522  | 0,061774371 | 0,086319557 |
| CDC42EP1 | -0,385361199 | 6,898789784 | 0,061821441 | 0,086367631 |
| SLC25A3  | 0,186031943  | 8,960636138 | 0,061969409 | 0,086539576 |
| FAM185A  | 0,239032587  | 2,786251463 | 0,0619699   | 0,086539576 |
| LATS1    | -0,24550285  | 4,706645941 | 0,062031729 | 0,086608182 |
| ASAP2    | 0,346370469  | 6,22405134  | 0,062128881 | 0,086713941 |
| RSBN1L   | 0,228328386  | 5,000518055 | 0,062132911 | 0,086713941 |
| ATN1     | -0,275820039 | 7,969615645 | 0,062337898 | 0,086982223 |
| MBD2     | 0,261795797  | 6,991245163 | 0,062418325 | 0,087076627 |
| RND3     | 0,418134548  | 6,871572435 | 0,06250493  | 0,087168913 |
| ADAM8    | 0,58980558   | 5,298784162 | 0,062510044 | 0,087168913 |
| PDIA5    | 0,285132178  | 5,766226062 | 0,062598797 | 0,08727483  |
| FLNB     | -0,330598913 | 8,354775216 | 0,062886238 | 0,087657656 |
| DCP2     | -0,217226529 | 5,408961178 | 0,062943491 | 0,087719531 |
| ARPP19   | -0,207690082 | 8,062850736 | 0,063140706 | 0,087976394 |
| ITFG3    | 0,26508412   | 6,948932402 | 0,063194468 | 0,088033315 |

|          |              |             |             |             |
|----------|--------------|-------------|-------------|-------------|
| SEC13    | 0,242199448  | 7,148576981 | 0,063305595 | 0,088170108 |
| CLDN4    | 0,521338635  | 8,257840309 | 0,063472769 | 0,08837625  |
| IDH3A    | 0,272525667  | 6,381019569 | 0,063479523 | 0,08837625  |
| PCNP     | 0,272826967  | 7,74276217  | 0,063608771 | 0,088538112 |
| SERGEF   | -0,260121454 | 4,245692727 | 0,063927058 | 0,088962982 |
| SMYD4    | -0,231736631 | 4,478183892 | 0,063981627 | 0,089020754 |
| CAMLG    | -0,208839557 | 5,429624352 | 0,064132001 | 0,089211774 |
| CASP4    | -0,325443244 | 6,529906515 | 0,064558195 | 0,089786321 |
| UBE2R2   | 0,274357152  | 7,193214781 | 0,065093485 | 0,090512332 |
| POLD3    | 0,244369473  | 5,264737604 | 0,06529376  | 0,090772304 |
| NRBF2    | 0,224407547  | 5,484931439 | 0,065664408 | 0,091268976 |
| ITFG2    | -0,271312297 | 4,915063009 | 0,065688972 | 0,091284512 |
| TTYH2    | -0,411452065 | 4,02644877  | 0,065740193 | 0,09133621  |
| MED16    | -0,23275403  | 5,939639781 | 0,065752963 | 0,09133621  |
| PAIP2    | -0,213347677 | 6,891373559 | 0,066151745 | 0,091871436 |
| MGST3    | -0,314463098 | 6,567061649 | 0,06658511  | 0,092454462 |
| GRINA    | -0,229806594 | 8,216233574 | 0,066947625 | 0,092938895 |
| BRAP     | 0,175801106  | 5,274333248 | 0,067523399 | 0,093719124 |
| BSG      | 0,253977608  | 9,314936924 | 0,067717602 | 0,093969541 |
| NUPR1    | -0,448729492 | 6,868679585 | 0,067760789 | 0,09401034  |
| SAT1     | -0,373047391 | 9,359303102 | 0,068068994 | 0,094418729 |
| UBE2B    | -0,255426176 | 6,347684831 | 0,068099911 | 0,094442403 |
| TUG1     | 0,287706897  | 7,975047809 | 0,068125091 | 0,094458113 |
| MED1     | -0,263633091 | 6,234495088 | 0,06823932  | 0,09459726  |
| ARMC8    | 0,217380947  | 6,053884444 | 0,068376562 | 0,094768247 |
| NSMCE4A  | 0,262205592  | 5,173739188 | 0,068663301 | 0,095146322 |
| PI4KA    | -0,314263606 | 6,907417692 | 0,06889909  | 0,095442401 |
| CXorf38  | -0,175326939 | 4,234831796 | 0,068904963 | 0,095442401 |
| KLHL8    | -0,22691549  | 4,891426106 | 0,068944206 | 0,095477364 |
| RHOBTB3  | -0,402728128 | 6,101091037 | 0,068989945 | 0,095521306 |
| ADNP2    | 0,243852038  | 5,784781599 | 0,069194825 | 0,095785528 |
| TNKS1BP1 | -0,307362406 | 8,020283469 | 0,069818649 | 0,096629463 |
| XRCC4    | 0,284059005  | 3,586454252 | 0,069867733 | 0,096677775 |
| DCXR     | 0,362399541  | 6,146542186 | 0,070001946 | 0,096843836 |
| CYP1B1   | -0,535465784 | 6,431299964 | 0,07004752  | 0,096887229 |
| SAMD8    | 0,323269456  | 3,555666295 | 0,070093684 | 0,096931419 |
| ZMYND8   | 0,346831286  | 6,206684267 | 0,07035317  | 0,097270532 |
| AKR7A2   | 0,276813316  | 5,993293544 | 0,070738848 | 0,097766195 |
| FBXW5    | 0,272922514  | 6,930812787 | 0,070740344 | 0,097766195 |
| ATF4     | 0,258316235  | 8,911756066 | 0,070946312 | 0,098030983 |
| SLC35C1  | -0,301272043 | 5,693681669 | 0,071045733 | 0,098148472 |
| HBP1     | -0,214334416 | 6,948124368 | 0,071114613 | 0,098223728 |
| SLC20A1  | 0,27935401   | 6,503222834 | 0,071409365 | 0,098610867 |
| RHOQ     | -0,265957637 | 7,09737851  | 0,071555371 | 0,098792483 |
| NPC1     | -0,307035389 | 6,991920532 | 0,071585157 | 0,098813601 |
| GDI1     | 0,216580987  | 7,560575636 | 0,072078475 | 0,099474422 |
| SMARCA4  | 0,350740748  | 7,703231558 | 0,072244663 | 0,099683601 |
| NSMAF    | 0,23535493   | 5,950386041 | 0,072586583 | 0,100135123 |
| IFT80    | 0,258742582  | 5,753602805 | 0,07284189  | 0,100459678 |
| ITGB5    | 0,348903918  | 8,11802789  | 0,072851314 | 0,100459678 |

|          |              |             |             |             |
|----------|--------------|-------------|-------------|-------------|
| TAB3     | -0,217296846 | 5,482394717 | 0,072986664 | 0,100625973 |
| TMEM14C  | 0,342010381  | 7,174416492 | 0,073339833 | 0,101092444 |
| HADHA    | -0,164003911 | 8,245734273 | 0,073386335 | 0,1011361   |
| UTP20    | 0,221431716  | 5,592903445 | 0,073825539 | 0,101720822 |
| MRPS18C  | 0,220680575  | 4,407465434 | 0,073851562 | 0,101736121 |
| SMAD4    | -0,224816269 | 6,785028919 | 0,073897889 | 0,101779379 |
| ELP4     | 0,244748833  | 4,347177615 | 0,074095618 | 0,102031103 |
| MORC3    | -0,211338371 | 5,602603603 | 0,074443115 | 0,102488916 |
| RAVER2   | -0,286734356 | 4,949429983 | 0,074542219 | 0,102604641 |
| NEK4     | -0,178209866 | 4,641039754 | 0,074817469 | 0,102962728 |
| PACRGL   | 0,273368988  | 3,915122017 | 0,074879297 | 0,103027023 |
| KCNQ1OT1 | 0,45378842   | 2,445908609 | 0,074978259 | 0,103142373 |
| IPO5     | 0,240336685  | 7,913191205 | 0,07501178  | 0,103167675 |
| GNB1     | -0,174275003 | 9,144662928 | 0,075041633 | 0,10318792  |
| ZNF772   | 0,356974368  | 3,863842412 | 0,07528219  | 0,103497833 |
| SLC4A7   | 0,295364445  | 4,983151894 | 0,07542575  | 0,103674298 |
| MRPL20   | 0,239201603  | 6,325320845 | 0,075457396 | 0,103696893 |
| LRRC37A  | -0,287669838 | 3,459417323 | 0,075477435 | 0,103703532 |
| VPS13B   | -0,245012054 | 5,661013718 | 0,075569608 | 0,103809257 |
| TRIP12   | -0,216341729 | 7,670002298 | 0,075667264 | 0,103922472 |
| RRN3P2   | -0,192415667 | 2,37789382  | 0,075730174 | 0,10398793  |
| FKBP1A   | -0,195362134 | 8,785120627 | 0,075894912 | 0,104193156 |
| SMC3     | 0,234455555  | 6,674113567 | 0,076011288 | 0,104331918 |
| UBR5     | 0,240394999  | 7,287469392 | 0,076393715 | 0,10483573  |
| U2AF1    | 0,209254217  | 6,721452801 | 0,076453775 | 0,10489704  |
| CD2AP    | -0,230681812 | 6,4320244   | 0,076720345 | 0,105241608 |
| LRMP     | 0,925437646  | 4,918258699 | 0,077184886 | 0,105854148 |
| WDR44    | -0,238982183 | 4,820465972 | 0,077197929 | 0,105854148 |
| FGD6     | 0,321609058  | 5,870454983 | 0,077249595 | 0,105903697 |
| F3       | -0,535679656 | 7,193923737 | 0,077354462 | 0,106026146 |
| MRPL43   | 0,30568464   | 6,236745265 | 0,077506866 | 0,106198022 |
| PARVB    | -0,33938197  | 5,488306882 | 0,077511007 | 0,106198022 |
| KPNA3    | -0,199669495 | 6,559146044 | 0,07774247  | 0,106493753 |
| IFFO2    | 0,526350731  | 5,987470719 | 0,077851425 | 0,106621585 |
| STT3B    | -0,204263969 | 7,05229371  | 0,077989208 | 0,106788837 |
| MFAP1    | 0,194107294  | 5,810296423 | 0,078111551 | 0,106934886 |
| RPS12    | 0,326540243  | 10,38943088 | 0,0782707   | 0,107131253 |
| LPIN1    | -0,344901226 | 5,432972031 | 0,078378307 | 0,107257009 |
| NR2C1    | -0,199607009 | 4,533964923 | 0,078399647 | 0,107264686 |
| KDM4C    | -0,247274531 | 5,261398959 | 0,078636933 | 0,107566387 |
| DNAL4    | 0,259342919  | 5,14189303  | 0,078651709 | 0,107566387 |
| ANGPTL2  | -0,442508752 | 6,378343927 | 0,078907922 | 0,107895152 |
| PRR14    | 0,209814321  | 5,340469133 | 0,079191103 | 0,108260652 |
| ZNF318   | 0,329858435  | 5,801739574 | 0,07929701  | 0,108383707 |
| C19orf43 | 0,262596482  | 6,8266179   | 0,079725733 | 0,10894785  |
| BMS1     | 0,238426498  | 6,471867915 | 0,079751074 | 0,108960644 |
| RPL36AL  | -0,255055234 | 7,481610505 | 0,079879507 | 0,109114254 |
| ASB7     | 0,198886614  | 4,86913094  | 0,080179809 | 0,109502526 |
| ZNF141   | -0,267733847 | 2,384656906 | 0,080237018 | 0,109558715 |
| GNG5     | -0,230223439 | 6,813158414 | 0,080284763 | 0,109601961 |

|          |              |             |             |             |
|----------|--------------|-------------|-------------|-------------|
| CDIPT    | -0,181989878 | 6,918900289 | 0,080394962 | 0,109730433 |
| MPV17    | 0,224476014  | 6,177983895 | 0,080480068 | 0,109824611 |
| DTX3     | 0,295085412  | 5,070198637 | 0,080526734 | 0,109866307 |
| STX4     | -0,188117088 | 5,621071202 | 0,080696291 | 0,110075617 |
| KLF16    | 0,274070746  | 5,139589406 | 0,080744308 | 0,110119087 |
| RBM3     | -0,266163053 | 8,316628251 | 0,080768833 | 0,110130508 |
| ZNF638   | -0,205978137 | 6,668966225 | 0,08096595  | 0,110377212 |
| SLC30A1  | -0,257758198 | 4,375457019 | 0,081040994 | 0,110457433 |
| YES1     | 0,252465165  | 7,044539284 | 0,081152561 | 0,110587393 |
| DTNBP1   | -0,222824396 | 4,570502881 | 0,081184476 | 0,11060878  |
| DHX15    | 0,174682917  | 7,430862795 | 0,081336199 | 0,110793356 |
| GFER     | 0,22600831   | 4,431961317 | 0,081375735 | 0,110825073 |
| POFUT2   | 0,239985382  | 5,270447903 | 0,081607669 | 0,111118749 |
| CCNY     | -0,249932571 | 7,121912078 | 0,081660086 | 0,111167923 |
| FBXO31   | -0,194473442 | 5,092930126 | 0,081743085 | 0,111258702 |
| ADD3     | 0,341168509  | 7,411294537 | 0,081834958 | 0,11136152  |
| PRKACB   | -0,294909736 | 5,895785841 | 0,081960332 | 0,111509878 |
| BCL6     | -0,293771179 | 6,879763879 | 0,082169955 | 0,111772775 |
| RNF41    | -0,188424929 | 6,224635127 | 0,082507877 | 0,112210054 |
| AP4E1    | -0,183325547 | 4,662847342 | 0,082600253 | 0,112313285 |
| DNAJC25  | 0,221639406  | 3,779733708 | 0,082641227 | 0,112346597 |
| NDUFS4   | 0,290097417  | 5,456617621 | 0,082674926 | 0,112370006 |
| ABCF1    | 0,221946066  | 7,169518331 | 0,083105789 | 0,112933115 |
| VKORC1   | 0,266186308  | 6,349769211 | 0,083129295 | 0,11294255  |
| ARF3     | -0,169802789 | 8,53101601  | 0,083211382 | 0,113031556 |
| MAF1     | 0,200975842  | 7,441599303 | 0,083282216 | 0,113105244 |
| ENTPD5   | 0,314314649  | 3,797037342 | 0,08342013  | 0,113269985 |
| DIAPH2   | -0,440685255 | 4,921641697 | 0,083492421 | 0,113333061 |
| CDC37    | -0,21549616  | 7,467744358 | 0,083499824 | 0,113333061 |
| BAZ2A    | -0,207891118 | 7,375614383 | 0,083685949 | 0,113563082 |
| CHST11   | -0,402474666 | 4,53661881  | 0,084059296 | 0,114047023 |
| EPHA4    | 0,52126425   | 5,349807109 | 0,084225323 | 0,114249548 |
| TASP1    | 0,216900956  | 4,132145469 | 0,084244104 | 0,114252296 |
| POLDIP3  | -0,172640076 | 7,083806624 | 0,084608551 | 0,114723745 |
| LAMP1    | -0,354149392 | 9,018651293 | 0,084736581 | 0,114874502 |
| RGL2     | -0,241433315 | 6,271177245 | 0,084823509 | 0,114969491 |
| GSTA4    | 0,473605132  | 6,123013096 | 0,085352059 | 0,115662895 |
| MTDH     | 0,195238079  | 8,022249771 | 0,085390854 | 0,115692476 |
| TBC1D22B | 0,17712207   | 5,027237856 | 0,085491475 | 0,115805795 |
| THYN1    | 0,270464846  | 5,420887829 | 0,085747368 | 0,116129355 |
| CD82     | -0,370408046 | 6,912349569 | 0,085880576 | 0,116286665 |
| TGFBI    | 0,565731949  | 8,88165892  | 0,086077376 | 0,116530003 |
| FAM172A  | -0,222164593 | 5,147116832 | 0,086112699 | 0,116554683 |
| VAMP7    | -0,185851008 | 6,165686991 | 0,086624757 | 0,117220472 |
| TOLLIP   | -0,23338057  | 6,369553192 | 0,086638976 | 0,117220472 |
| SYNGR2   | 0,312136283  | 8,76761531  | 0,08667823  | 0,117245418 |
| DNAJA1   | -0,271332421 | 7,834305442 | 0,086691802 | 0,117245418 |
| GLT8D2   | -0,455536611 | 3,841404316 | 0,086987335 | 0,11762178  |
| IER3     | 0,529842194  | 7,154224614 | 0,087288824 | 0,118006045 |
| JMJD8    | -0,205002112 | 6,365828886 | 0,087424141 | 0,118165553 |



|          |              |             |             |             |
|----------|--------------|-------------|-------------|-------------|
| ASAP1    | -0,239984489 | 6,494524196 | 0,087704558 | 0,118521082 |
| RAD17    | -0,162118183 | 4,908565038 | 0,087823377 | 0,118658135 |
| MSL1     | 0,179404577  | 6,752962897 | 0,08817313  | 0,119107087 |
| INPP5F   | 0,307617181  | 5,04538688  | 0,08822492  | 0,119153442 |
| JHDM1D   | -0,250459632 | 5,678140592 | 0,088295312 | 0,119224897 |
| MRFAP1L1 | -0,197102034 | 6,212889302 | 0,088516068 | 0,11949932  |
| RPL9     | 0,452300811  | 10,89546986 | 0,088564971 | 0,119541674 |
| SEPT7    | -0,182254199 | 7,88126521  | 0,088595529 | 0,119559254 |
| CHUK     | -0,171162772 | 5,38272394  | 0,088670808 | 0,119637166 |
| OFD1     | 0,261375418  | 5,316432026 | 0,088920219 | 0,119949945 |
| RPL5     | 0,299555774  | 10,39632731 | 0,089161546 | 0,120251698 |
| NT5C2    | -0,202587266 | 6,74444086  | 0,089222315 | 0,12030986  |
| ATF1     | 0,19611696   | 5,329795147 | 0,08926598  | 0,120344942 |
| ZBTB8OS  | 0,229025141  | 4,095918343 | 0,089655634 | 0,120846366 |
| ZNF426   | -0,284255562 | 3,368516341 | 0,090418805 | 0,121850955 |
| ATOX1    | 0,271808931  | 5,46010412  | 0,090532865 | 0,121980559 |
| NOTCH1   | -0,367242338 | 6,708899744 | 0,09062     | 0,12207384  |
| IFIH1    | -0,400637939 | 5,584374249 | 0,090647354 | 0,12208657  |
| ZNF607   | 0,488201306  | 3,320288092 | 0,090871269 | 0,122330866 |
| BCAS3    | 0,301988653  | 5,926331605 | 0,090873577 | 0,122330866 |
| ZNF484   | 0,254453214  | 2,849566325 | 0,090882559 | 0,122330866 |
| ZNF410   | 0,241737285  | 6,637660578 | 0,091363763 | 0,122954312 |
| CAP2     | -0,404775485 | 3,476668018 | 0,091478261 | 0,123084109 |
| RPS9     | 0,297896183  | 10,05710818 | 0,091619057 | 0,12324923  |
| TGFBRAP1 | -0,247691543 | 4,33651928  | 0,091681772 | 0,12330927  |
| ARL1     | 0,213699432  | 7,059393362 | 0,091732942 | 0,123353762 |
| ATF7IP   | 0,260125182  | 6,179045343 | 0,092412993 | 0,12424373  |
| MBTPS1   | -0,18986392  | 7,558285744 | 0,092453873 | 0,124274189 |
| NDUFV3   | 0,195086724  | 5,349974948 | 0,092597743 | 0,124439705 |
| CNIH4    | 0,298688236  | 6,601072192 | 0,092613507 | 0,124439705 |
| PSIP1    | -0,317742324 | 6,413773631 | 0,092646511 | 0,124459527 |
| SPTY2D1  | -0,20362245  | 5,826638315 | 0,092879937 | 0,124748531 |
| FSTL1    | -0,361660558 | 8,627654303 | 0,093124623 | 0,125052542 |
| B4GALT5  | -0,274691539 | 7,537673724 | 0,093256395 | 0,125204835 |
| CCDC71   | -0,184056189 | 4,690433524 | 0,093467729 | 0,125463866 |
| CHD8     | -0,236475201 | 6,684479014 | 0,093492904 | 0,12547296  |
| ARID2    | 0,234856085  | 5,704276949 | 0,093658629 | 0,125670639 |
| BMP1     | 0,375369748  | 6,001570996 | 0,093909358 | 0,125982276 |
| LAMP2    | 0,236564482  | 8,689346319 | 0,09411298  | 0,126230607 |
| PGS1     | -0,197037971 | 5,471872491 | 0,094195001 | 0,126315774 |
| VCP      | 0,305049158  | 9,249744062 | 0,094629511 | 0,126873502 |
| RNF135   | -0,233324643 | 5,022771168 | 0,094714091 | 0,12696194  |
| FBXO28   | 0,164662531  | 6,236321152 | 0,094900622 | 0,127186977 |
| SEC11C   | 0,533366127  | 6,529811066 | 0,094929803 | 0,127201087 |
| DUSP5    | -0,431180511 | 5,904289726 | 0,095007705 | 0,12728046  |
| FAM165B  | 0,321340591  | 4,445341332 | 0,09522791  | 0,127550406 |
| INTS10   | 0,247704161  | 6,360771095 | 0,095388947 | 0,127741011 |
| KIAA1279 | -0,184603257 | 5,174881258 | 0,095534825 | 0,127911245 |
| ITFG1    | -0,196654132 | 6,408451386 | 0,095947971 | 0,128439186 |
| MRPL23   | 0,250255038  | 5,3480626   | 0,096053925 | 0,128555783 |

|          |              |             |             |             |
|----------|--------------|-------------|-------------|-------------|
| KIAA1432 | -0,274660406 | 5,418719461 | 0,096238106 | 0,128771843 |
| ERP44    | -0,169068988 | 6,879525992 | 0,096253128 | 0,128771843 |
| PSMF1    | 0,175243995  | 7,688611245 | 0,09637065  | 0,128903778 |
| CCDC115  | -0,199166169 | 6,051163124 | 0,096434719 | 0,128964178 |
| SERPINE1 | -0,479106121 | 8,284202378 | 0,096522645 | 0,129056455 |
| PLEKHO1  | -0,250828666 | 6,02677139  | 0,096767721 | 0,129344834 |
| OAS3     | -0,405521988 | 7,372769782 | 0,096776264 | 0,129344834 |
| USP49    | 0,321855033  | 1,034732295 | 0,096863557 | 0,129436135 |
| C6orf48  | 0,304114803  | 6,809630766 | 0,097049259 | 0,129658875 |
| TMED9    | 0,212002877  | 8,041243792 | 0,098134575 | 0,131083186 |
| HMG2     | 0,27097815   | 9,358073844 | 0,098819239 | 0,131971875 |
| SLC10A3  | 0,204551201  | 5,897757558 | 0,098886208 | 0,132035452 |
| MAK16    | 0,239777254  | 5,103393499 | 0,099262879 | 0,132512445 |
| ANAPC13  | 0,233006348  | 6,445546242 | 0,099501522 | 0,132805026 |
| NNT      | 0,318219377  | 6,789415359 | 0,099618002 | 0,132934472 |
| TIMM22   | 0,188431742  | 4,892450636 | 0,099703006 | 0,133021874 |
| SFI1     | 0,272660462  | 4,485597843 | 0,099828417 | 0,133145564 |
| MIER3    | -0,200494418 | 4,749957931 | 0,099834766 | 0,133145564 |
| SLC7A6   | -0,180971654 | 5,99224399  | 0,0999376   | 0,133256647 |
| BLNK     | 0,3986156    | 3,951520629 | 0,100261099 | 0,133651208 |
| KCTD11   | 0,408074466  | 5,548480687 | 0,100272705 | 0,133651208 |
| GSTK1    | -0,250766076 | 6,860564739 | 0,100335911 | 0,133709317 |
| TCF12    | -0,206129576 | 6,629226533 | 0,100506546 | 0,133910539 |
| ADH5     | 0,29851027   | 8,092493116 | 0,100576786 | 0,133961645 |
| RPL29    | 0,271825469  | 9,859868737 | 0,100584195 | 0,133961645 |
| GSTO1    | 0,368420952  | 7,743150608 | 0,100612521 | 0,133973205 |
| TRPM7    | 0,253077314  | 6,122357084 | 0,100709874 | 0,134076656 |
| TAF12    | 0,225138532  | 4,870142328 | 0,101065662 | 0,134524058 |
| NRBP2    | -0,322679857 | 5,089411637 | 0,102054954 | 0,13581435  |
| FAM168B  | -0,216071132 | 7,403954576 | 0,102179426 | 0,135953464 |
| MGAT5    | -0,338851521 | 4,337819257 | 0,102263846 | 0,136039244 |
| PLEKHG2  | -0,303529771 | 5,624664982 | 0,10240648  | 0,136202416 |
| ATP13A1  | 0,227959195  | 6,704339491 | 0,102513523 | 0,136318197 |
| FAM20B   | 0,276121483  | 7,231233354 | 0,102734237 | 0,136585057 |
| PAPD4    | -0,166785317 | 5,676137999 | 0,102901634 | 0,136780944 |
| SCAF1    | 0,234446311  | 6,678590031 | 0,103007319 | 0,13689474  |
| SLTM     | -0,188766685 | 6,602059824 | 0,103031013 | 0,136899548 |
| COPS4    | 0,218461388  | 5,918600236 | 0,103349258 | 0,137295654 |
| BLOC1S2  | 0,235452392  | 5,986224476 | 0,103375363 | 0,137303585 |
| WRN      | 0,265151578  | 4,496856663 | 0,103412493 | 0,137326152 |
| CASP9    | -0,237655237 | 4,569685506 | 0,103476387 | 0,137384244 |
| MED15    | 0,287298064  | 7,25087047  | 0,103563013 | 0,137472491 |
| RAB23    | 0,262631764  | 5,120911433 | 0,103641828 | 0,137550336 |
| FDPS     | 0,277523478  | 7,853278357 | 0,104055592 | 0,138072597 |
| PSME2    | 0,310400081  | 7,588965897 | 0,104471529 | 0,138597541 |
| ZNF415   | -0,453678108 | 2,81334518  | 0,105067366 | 0,139360897 |
| VHL      | 0,190841284  | 5,45429969  | 0,105222674 | 0,139539754 |
| PLEKHA7  | -0,347256963 | 4,589168576 | 0,105355291 | 0,139688456 |
| SMC1A    | 0,245686745  | 7,447286521 | 0,105885638 | 0,14036434  |
| ANAPC16  | -0,206643045 | 7,296668444 | 0,106638701 | 0,141335141 |

|          |              |             |             |             |
|----------|--------------|-------------|-------------|-------------|
| NPRL3    | 0,208950549  | 5,870253628 | 0,106678039 | 0,141359804 |
| MAVS     | -0,223168454 | 7,264268568 | 0,106734751 | 0,141407473 |
| ZNF267   | 0,22928646   | 4,846887778 | 0,107229036 | 0,142034731 |
| C3orf38  | 0,33137138   | 5,124017607 | 0,107352817 | 0,142171074 |
| FUS      | 0,192101876  | 8,126152688 | 0,107887015 | 0,142850787 |
| PPFIA1   | 0,413394407  | 6,750162007 | 0,108281366 | 0,143345104 |
| TM9SF3   | -0,152691907 | 8,166477883 | 0,108397623 | 0,143471155 |
| HERPUD1  | -0,27996537  | 7,645333764 | 0,108498221 | 0,143576435 |
| BRWD1    | -0,190204937 | 5,881525299 | 0,108772086 | 0,143910915 |
| CLCN7    | -0,21157632  | 6,508618157 | 0,10881678  | 0,143942119 |
| CDC26    | 0,198051251  | 4,897131651 | 0,108858023 | 0,143968746 |
| CD3G     | -0,374426633 | 2,510661399 | 0,108932048 | 0,144038711 |
| PHKA2    | 0,261859242  | 5,30614629  | 0,108997669 | 0,144097539 |
| CANX     | -0,173257696 | 9,92578082  | 0,109101073 | 0,144206284 |
| GOLIM4   | 0,372005818  | 6,903529484 | 0,109249403 | 0,144374356 |
| AIMP1    | 0,171010713  | 6,054624172 | 0,109452015 | 0,144614085 |
| LAMC1    | -0,272932523 | 8,580186926 | 0,109784351 | 0,145025085 |
| KIF16B   | -0,283628201 | 5,31239174  | 0,110018803 | 0,145306647 |
| RC3H2    | -0,206896762 | 4,909491818 | 0,110224675 | 0,145550359 |
| SLC35D1  | 0,238256948  | 5,072744154 | 0,110286696 | 0,145604061 |
| SF1      | -0,143028192 | 8,067947689 | 0,110528361 | 0,145894869 |
| CLCC1    | -0,146782751 | 5,6268222   | 0,110668208 | 0,146051192 |
| GATAD2A  | 0,217211333  | 6,954445356 | 0,111238141 | 0,146774938 |
| ZNF337   | 0,250316621  | 4,63499423  | 0,111302585 | 0,146831559 |
| RBM39    | 0,15688111   | 7,678125109 | 0,112185324 | 0,147967451 |
| MIP      | 0,25081987   | 4,986011562 | 0,112379451 | 0,148194833 |
| HP1BP3   | -0,16597998  | 7,849657708 | 0,113455111 | 0,149584378 |
| EIF5     | 0,189723345  | 8,501734573 | 0,115023986 | 0,151608381 |
| COG4     | 0,182816197  | 6,481959923 | 0,115034721 | 0,151608381 |
| MKRN1    | 0,198486635  | 7,521817609 | 0,115091413 | 0,151653787 |
| XRCC1    | 0,220210489  | 5,644794341 | 0,115237665 | 0,151817163 |
| PPIL4    | -0,167919467 | 5,430525875 | 0,115283274 | 0,151847913 |
| INPP4A   | -0,241915796 | 5,513761965 | 0,115367491 | 0,151929494 |
| IFT52    | 0,269754517  | 5,653032933 | 0,115652723 | 0,152259085 |
| CHID1    | 0,181602906  | 6,663946248 | 0,115662423 | 0,152259085 |
| CERK     | 0,243120529  | 6,439408391 | 0,1157362   | 0,1523268   |
| PIK3CB   | 0,260613748  | 6,18820237  | 0,115869399 | 0,152472681 |
| EPB41L1  | -0,313325683 | 6,574706938 | 0,116007921 | 0,152617002 |
| ECD      | 0,173228073  | 5,328413576 | 0,116023836 | 0,152617002 |
| TRAPPC2L | 0,306895799  | 5,374414641 | 0,116085064 | 0,152668091 |
| MAGED2   | -0,246587537 | 7,644211103 | 0,116269684 | 0,152881406 |
| C9orf78  | 0,171542112  | 6,485214802 | 0,116718588 | 0,153442077 |
| C4orf52  | 0,257815614  | 4,736385172 | 0,117069298 | 0,153873466 |
| ZC3H18   | 0,185196773  | 5,929808772 | 0,117647071 | 0,15460308  |
| FAM53B   | -0,269132699 | 6,199457186 | 0,117880686 | 0,154880231 |
| RPS20    | 0,260055979  | 10,05653522 | 0,118081182 | 0,15511377  |
| IL8      | 0,870181688  | 8,195522945 | 0,118375872 | 0,155470931 |
| PARP10   | -0,306690436 | 6,161233741 | 0,118610129 | 0,155748599 |
| RAB22A   | 0,178680903  | 6,473780484 | 0,118840688 | 0,156021303 |
| ATRIP    | 0,166411822  | 3,56397722  | 0,118882798 | 0,156046544 |

|          |              |             |             |             |
|----------|--------------|-------------|-------------|-------------|
| RFX7     | 0,245341423  | 5,410849793 | 0,119194565 | 0,156425662 |
| MMP2     | -0,435263697 | 9,109558743 | 0,119349229 | 0,156598498 |
| FIZ1     | 0,344039079  | 4,663708384 | 0,119467099 | 0,156722999 |
| ZNF765   | 0,215815882  | 4,346720394 | 0,119498606 | 0,156734178 |
| FTSJD2   | -0,163638684 | 6,207359302 | 0,120057283 | 0,157436657 |
| NEDD4    | -0,269935994 | 4,779147528 | 0,120327506 | 0,157760673 |
| TRIM26   | -0,182548852 | 6,520203872 | 0,120463491 | 0,157908601 |
| CBLL1    | 0,157689762  | 5,49204495  | 0,120978985 | 0,158553854 |
| SARS     | -0,188837997 | 7,508488801 | 0,121180225 | 0,158787078 |
| GPR107   | -0,19802736  | 7,487046531 | 0,121219542 | 0,158808079 |
| FBXO6    | 0,279872465  | 5,029842586 | 0,121258903 | 0,158829132 |
| TYW1     | 0,242362239  | 5,090638804 | 0,12165092  | 0,159312007 |
| SUPT5H   | 0,269558184  | 7,873025895 | 0,121944148 | 0,15966535  |
| ING5     | -0,210649581 | 4,557274258 | 0,122117983 | 0,159862262 |
| LIMD2    | 0,313884996  | 5,221961084 | 0,122183509 | 0,159894654 |
| VGLL4    | 0,235297974  | 6,718100402 | 0,122189624 | 0,159894654 |
| RUFY2    | -0,168141509 | 4,304259445 | 0,122334932 | 0,160050001 |
| HIF1AN   | -0,15581668  | 6,274170764 | 0,12235528  | 0,160050001 |
| RGMB     | -0,246646689 | 5,179925587 | 0,122446943 | 0,160139184 |
| ZGPAT    | 0,231246042  | 5,157245227 | 0,122637357 | 0,160357456 |
| TUBG2    | 0,202769687  | 4,824453497 | 0,122997806 | 0,160797937 |
| SLC1A3   | 0,516405547  | 5,475493141 | 0,123046434 | 0,160830675 |
| PIM1     | -0,296922572 | 6,623801535 | 0,123150391 | 0,160935706 |
| CHMP4A   | 0,212499575  | 5,931588796 | 0,123442974 | 0,161287151 |
| PHPT1    | 0,29029973   | 5,873876395 | 0,12363928  | 0,161512692 |
| ABCA2    | -0,310842915 | 5,632443521 | 0,123702065 | 0,161563758 |
| GCN1L1   | 0,224951833  | 7,626806969 | 0,123896599 | 0,161773585 |
| AKT1     | -0,184304493 | 7,910833477 | 0,123910168 | 0,161773585 |
| DNAJA4   | 0,348346596  | 5,989004388 | 0,124172683 | 0,162085284 |
| TLK2     | 0,147806539  | 6,051859129 | 0,124592368 | 0,162601982 |
| RABGGTA  | -0,196955669 | 5,33812286  | 0,124656719 | 0,162654835 |
| ARFGEF1  | 0,206617638  | 6,832837226 | 0,124847629 | 0,162872773 |
| HNRNPM   | 0,170522444  | 8,215024646 | 0,124923964 | 0,162941185 |
| ZNF613   | -0,279186021 | 2,709301314 | 0,12506083  | 0,163088506 |
| FEZ1     | -0,416221881 | 5,356593542 | 0,125299566 | 0,163368593 |
| GCC1     | -0,183660819 | 5,393057794 | 0,125374529 | 0,163435082 |
| SEPT10   | -0,254988667 | 7,103754095 | 0,125887441 | 0,164072336 |
| CSNK1D   | -0,157701359 | 7,627514395 | 0,125977974 | 0,164158953 |
| DCTN3    | 0,331806118  | 6,092329288 | 0,126134646 | 0,164331706 |
| SCYL1    | 0,156999592  | 6,917357539 | 0,126270841 | 0,16447772  |
| C17orf49 | -0,166058355 | 7,158337356 | 0,12650421  | 0,16475023  |
| ZNF160   | -0,242397845 | 5,089756352 | 0,126654314 | 0,164914219 |
| LIMS1    | -0,213303819 | 5,329742694 | 0,127023572 | 0,165363447 |
| PELO     | -0,183754197 | 5,29272413  | 0,127349745 | 0,165751067 |
| RNF25    | 0,183718384  | 4,802546609 | 0,127369935 | 0,165751067 |
| ATG4A    | -0,245368712 | 4,717743325 | 0,127557478 | 0,16596345  |
| DDA1     | 0,202132155  | 5,863905506 | 0,127613506 | 0,165986186 |
| CCDC6    | -0,191216261 | 7,056724341 | 0,127623636 | 0,165986186 |
| ACADM    | -0,221326361 | 5,752844666 | 0,1278611   | 0,166263318 |
| HIP1R    | 0,285468696  | 5,781222475 | 0,127901273 | 0,166283847 |

|          |              |             |             |             |
|----------|--------------|-------------|-------------|-------------|
| AKAP10   | -0,202589644 | 4,882366374 | 0,128249677 | 0,166705022 |
| ACO2     | 0,20064247   | 7,574583003 | 0,128600299 | 0,167128919 |
| ADO      | 0,170201047  | 5,49198962  | 0,128753682 | 0,167296371 |
| DDX42    | -0,172616496 | 7,285481079 | 0,129392358 | 0,168094207 |
| IGJ      | -0,573608285 | 9,733183066 | 0,129557322 | 0,168276453 |
| SIPA1L1  | -0,237724688 | 6,177479621 | 0,129817968 | 0,168582884 |
| UBE2D2   | 0,168216847  | 6,955092689 | 0,130019618 | 0,168812599 |
| ALG12    | 0,203195533  | 5,387606189 | 0,130179443 | 0,168987935 |
| AGL      | 0,21496331   | 5,715243715 | 0,130372477 | 0,169206304 |
| ZFX      | 0,250428156  | 5,543651691 | 0,130856883 | 0,16980268  |
| PLCD1    | -0,385800623 | 4,864263287 | 0,131104542 | 0,170091681 |
| PLSCR1   | 0,328364834  | 6,947604766 | 0,131238043 | 0,170232493 |
| PIN1     | 0,257218508  | 5,594024136 | 0,131387945 | 0,170394523 |
| PPM1A    | -0,150112688 | 6,4975795   | 0,13147393  | 0,170473613 |
| ROBO1    | 0,481808392  | 6,614094103 | 0,131509985 | 0,170480372 |
| MANSC1   | 0,367022156  | 6,054790448 | 0,131529145 | 0,170480372 |
| FNBP4    | 0,226766108  | 6,059882634 | 0,131686173 | 0,170651465 |
| USF2     | 0,196395056  | 7,257426924 | 0,13231651  | 0,171435736 |
| HIBCH    | 0,223471515  | 4,96404015  | 0,132502198 | 0,17164371  |
| SCFD1    | 0,198792883  | 6,109708068 | 0,132574323 | 0,171685659 |
| MXI1     | 0,231860333  | 6,135207136 | 0,132584936 | 0,171685659 |
| CAPNS1   | -0,199979996 | 9,073007734 | 0,132672588 | 0,171766542 |
| NSD1     | -0,225143682 | 6,640911747 | 0,13271758  | 0,171792175 |
| RNASEH2C | 0,214245514  | 5,187843216 | 0,132860092 | 0,171944005 |
| MAPKAP1  | 0,150530693  | 7,015112311 | 0,13294895  | 0,171978892 |
| ZNF514   | 0,289965799  | 3,641936445 | 0,132959595 | 0,171978892 |
| RCOR1    | -0,227230057 | 6,297294371 | 0,132988438 | 0,171978892 |
| NID2     | -0,381055292 | 4,899908088 | 0,133004969 | 0,171978892 |
| GIGYF1   | 0,265436473  | 5,924625413 | 0,133013151 | 0,171978892 |
| NPHP3    | -0,228254968 | 4,529890297 | 0,133052257 | 0,171996841 |
| CCDC47   | -0,158290484 | 7,602805041 | 0,133077722 | 0,171997154 |
| PPA2     | 0,213512294  | 6,301334664 | 0,133138055 | 0,172042524 |
| CDK5RAP2 | 0,45403014   | 6,814363936 | 0,133325666 | 0,172252314 |
| HERC2    | -0,25821043  | 6,483184223 | 0,133393203 | 0,172306924 |
| CDV3     | -0,177872276 | 8,13804163  | 0,133477593 | 0,172383277 |
| GATAD1   | 0,240661778  | 5,977477327 | 0,133535669 | 0,172415896 |
| MARCH7   | 0,171002646  | 7,117841858 | 0,133553419 | 0,172415896 |
| CCNT1    | 0,272810377  | 3,817047167 | 0,133671726 | 0,172535965 |
| ZDHHC24  | 0,192940996  | 4,383515111 | 0,133834626 | 0,172713534 |
| BTBD7    | -0,179936639 | 5,886536238 | 0,134327421 | 0,173316686 |
| RANBP6   | -0,227843164 | 5,11989183  | 0,134680853 | 0,173739829 |
| SDC2     | -0,418578137 | 6,827331677 | 0,134860178 | 0,173922522 |
| PCDHB9   | 0,313114274  | 2,803493017 | 0,134873485 | 0,173922522 |
| DCUN1D4  | 0,270077141  | 5,482317667 | 0,134923385 | 0,173953973 |
| FNDC3B   | 0,250770839  | 7,729857544 | 0,135245912 | 0,174310162 |
| PDGFA    | -0,391504173 | 5,560764694 | 0,135250779 | 0,174310162 |
| CWF19L2  | -0,165678452 | 4,630154763 | 0,135532543 | 0,174640289 |
| SNX17    | 0,186427321  | 7,813248861 | 0,135662511 | 0,174774733 |
| DHX32    | 0,212391766  | 5,874613623 | 0,135903499 | 0,175027678 |
| YWHAB    | -0,139810155 | 9,015148985 | 0,135910185 | 0,175027678 |

|          |              |             |             |             |
|----------|--------------|-------------|-------------|-------------|
| CDC42EP3 | -0,324574998 | 6,023340679 | 0,136000081 | 0,17510163  |
| LARGE    | -0,374740099 | 4,922102367 | 0,136018967 | 0,17510163  |
| TXNDC5   | 0,230561675  | 9,13760953  | 0,136201257 | 0,175303204 |
| C11orf57 | 0,162400032  | 5,69439459  | 0,136374903 | 0,175493577 |
| VAMP8    | -0,258740943 | 7,667289215 | 0,136420453 | 0,175519069 |
| HSBP1L1  | -0,271418336 | 3,481588597 | 0,136546513 | 0,175648118 |
| CLASP1   | 0,259178056  | 6,653042744 | 0,136860138 | 0,176018347 |
| SHROOM2  | 0,363485739  | 5,28835751  | 0,13740296  | 0,176683157 |
| EID2     | 0,282462334  | 4,426870159 | 0,137481046 | 0,176750236 |
| GNG10    | -0,233243504 | 6,204673311 | 0,1376381   | 0,176918795 |
| RBM12    | 0,11804293   | 7,014275969 | 0,137680339 | 0,176939735 |
| VPS4B    | 0,193955589  | 6,774498876 | 0,138070198 | 0,177407327 |
| CD300A   | -0,3397023   | 4,625879894 | 0,138158763 | 0,177487679 |
| RHOC     | 0,281202588  | 8,487353376 | 0,138192564 | 0,177497663 |
| RAB3GAP1 | -0,167125146 | 6,628450331 | 0,138264591 | 0,177556732 |
| RNF114   | 0,191024453  | 6,944803848 | 0,139148542 | 0,178658239 |
| BLVRB    | 0,398917735  | 6,904255543 | 0,139522564 | 0,179104737 |
| GTF2H2   | 0,235885509  | 3,977079166 | 0,139844896 | 0,17945267  |
| RARRES1  | 0,691446336  | 6,265397875 | 0,139846236 | 0,17945267  |
| RAB2B    | -0,169535663 | 5,260709834 | 0,14027144  | 0,179944874 |
| SHISA5   | -0,198650727 | 7,972599455 | 0,140282586 | 0,179944874 |
| LMBR1    | 0,199047639  | 6,26098406  | 0,140356043 | 0,180005239 |
| MDM4     | 0,228217786  | 5,904166443 | 0,140535825 | 0,180201916 |
| RANBP9   | 0,176423169  | 6,410875426 | 0,140649496 | 0,180313765 |
| TUBB6    | -0,28741134  | 7,378304661 | 0,141300152 | 0,18111386  |
| ZCCHC8   | 0,148035581  | 5,027711608 | 0,141362093 | 0,181159202 |
| TXLNG    | 0,247286892  | 3,833059107 | 0,14170158  | 0,181560141 |
| CCDC109B | 0,307532269  | 4,771456061 | 0,141850952 | 0,181717385 |
| ASXL2    | -0,229090864 | 5,579711653 | 0,1420443   | 0,181930894 |
| NSF      | 0,211725427  | 6,647059796 | 0,142157067 | 0,182041134 |
| KIFAP3   | -0,206610259 | 5,741727207 | 0,142347634 | 0,182250942 |
| DCAF7    | -0,155164505 | 7,716571025 | 0,142473649 | 0,182378039 |
| ARMC7    | -0,190218347 | 4,712944715 | 0,142754353 | 0,182703066 |
| ZKSCAN1  | 0,249382862  | 5,689973283 | 0,142834597 | 0,182771461 |
| TMEM64   | -0,26772174  | 5,637356362 | 0,143074656 | 0,183044293 |
| ATPAF1   | 0,170798781  | 6,08689817  | 0,143106117 | 0,183050199 |
| ATXN7L3B | 0,188516333  | 7,564120059 | 0,143153814 | 0,183076867 |
| ATP1B1   | 0,41374637   | 8,756273588 | 0,144166877 | 0,184337884 |
| PTPRA    | -0,15835209  | 6,954107706 | 0,144600729 | 0,184857962 |
| USP11    | -0,213060767 | 6,997591849 | 0,144908448 | 0,185216628 |
| PHC3     | 0,217339969  | 6,76739591  | 0,145614954 | 0,186084778 |
| RPL23    | 0,236818802  | 9,732592864 | 0,146274765 | 0,186877287 |
| C2orf18  | -0,14967378  | 6,624961723 | 0,146289919 | 0,186877287 |
| PRPF18   | -0,135809306 | 4,800989675 | 0,146451804 | 0,187049045 |
| LAT      | -0,327245538 | 3,454632793 | 0,146540259 | 0,187126971 |
| CPNE8    | 0,408254733  | 5,131570747 | 0,147779047 | 0,18867353  |
| ATP5O    | 0,233663567  | 7,343062093 | 0,147862523 | 0,18872883  |
| ZNF548   | -0,190422959 | 4,250554135 | 0,147877715 | 0,18872883  |
| MATR3    | -0,115930297 | 8,546418165 | 0,14796746  | 0,188808029 |
| LANCL1   | 0,222344278  | 6,684005772 | 0,148077039 | 0,188912503 |

|          |              |             |             |             |
|----------|--------------|-------------|-------------|-------------|
| ELAC2    | 0,155829241  | 6,376538152 | 0,148668248 | 0,189631272 |
| KIAA1217 | 0,284380792  | 7,098376549 | 0,148991916 | 0,19000858  |
| SVIL     | -0,265883983 | 7,285248145 | 0,149045274 | 0,190041085 |
| CPNE3    | 0,197498578  | 7,850888676 | 0,149444561 | 0,190514574 |
| MTRFIL   | -0,149059372 | 5,290735159 | 0,149554415 | 0,190618982 |
| RPL10    | 0,221885166  | 11,12817746 | 0,149724238 | 0,190799771 |
| MRPS27   | 0,169080848  | 6,423981662 | 0,150113817 | 0,191260486 |
| SEPT7P2  | 0,21962922   | 3,64797938  | 0,150371327 | 0,191552789 |
| ZNF542   | -0,354028299 | 4,193930144 | 0,1514366   | 0,192873772 |
| TMEM205  | -0,202133992 | 6,096796759 | 0,151482645 | 0,192896388 |
| CDK12    | 0,215703477  | 6,480122958 | 0,151643421 | 0,193065065 |
| ECM1     | 0,46674345   | 6,04810867  | 0,151682695 | 0,193079017 |
| RLTPR    | 0,481805503  | 2,479079911 | 0,151814714 | 0,193210714 |
| ENSA     | 0,186147802  | 8,222302141 | 0,151885089 | 0,193210714 |
| TRIM33   | -0,156116046 | 5,89236866  | 0,151890314 | 0,193210714 |
| RRP15    | 0,154096503  | 5,310855519 | 0,151899492 | 0,193210714 |
| MAP4K3   | 0,17685121   | 5,866239638 | 0,152075309 | 0,193398271 |
| RLF      | 0,249697016  | 5,653071059 | 0,15266814  | 0,194115989 |
| BAX      | 0,168473556  | 5,948756804 | 0,152765343 | 0,19420337  |
| PLCG1    | -0,22527435  | 6,477569789 | 0,152926859 | 0,19437246  |
| CRYAB    | 0,736918745  | 6,486363977 | 0,153234949 | 0,194727752 |
| NIN      | -0,222045229 | 6,098065697 | 0,153521857 | 0,195055998 |
| DBT      | 0,148089545  | 5,71394546  | 0,153915372 | 0,195519545 |
| NDUFA2   | 0,287323317  | 5,840897305 | 0,154356906 | 0,196043909 |
| FAM168A  | -0,234211399 | 3,751792529 | 0,154556093 | 0,196260335 |
| MAP3K2   | 0,183262533  | 5,637359578 | 0,154805947 | 0,196541008 |
| BTRC     | -0,158251768 | 5,077172425 | 0,155788774 | 0,197707072 |
| PTK2     | 0,1908517    | 7,493067958 | 0,155822899 | 0,197707072 |
| PCBP1    | 0,135433801  | 9,055573554 | 0,155835452 | 0,197707072 |
| PLXNA3   | 0,28666187   | 5,632139635 | 0,155840374 | 0,197707072 |
| ZNF211   | -0,225496992 | 3,977205782 | 0,156202802 | 0,198130005 |
| BATF     | -0,367449557 | 3,049965104 | 0,156241927 | 0,198142775 |
| DVL1     | 0,241032477  | 6,085711425 | 0,156487166 | 0,198409945 |
| ZFP36L1  | -0,227766427 | 8,960640824 | 0,156510793 | 0,198409945 |
| DDX21    | 0,214871502  | 7,588347131 | 0,156649096 | 0,198548362 |
| RABGGTB  | 0,192880943  | 5,743773112 | 0,157113376 | 0,199070077 |
| UPF1     | 0,219962718  | 7,45888576  | 0,157119102 | 0,199070077 |
| CXorf26  | -0,158241403 | 4,895334734 | 0,157268173 | 0,199221934 |
| VCAN     | 0,469576718  | 8,345108291 | 0,157318567 | 0,199248758 |
| AMPD2    | 0,178991672  | 5,805238786 | 0,157599695 | 0,199567748 |
| PARP6    | 0,215240004  | 5,773338388 | 0,158887254 | 0,201160821 |
| RGS10    | 0,299142225  | 5,005960394 | 0,158925013 | 0,201171276 |
| HS2ST1   | 0,214566043  | 6,193754441 | 0,15914269  | 0,201396424 |
| HMGN4    | 0,197744527  | 6,927159815 | 0,159161949 | 0,201396424 |
| MAN2A1   | -0,247782277 | 5,451166973 | 0,159639876 | 0,201963694 |
| SLC25A43 | 0,24214503   | 5,4353949   | 0,160496556 | 0,203009835 |
| ZUFSP    | 0,166740704  | 3,678599624 | 0,160551768 | 0,203042008 |
| CCDC112  | -0,235102843 | 3,155914393 | 0,160680692 | 0,203167372 |
| POR      | -0,205939685 | 7,526993085 | 0,160818381 | 0,203303771 |
| TCF7L1   | -0,337136649 | 5,508355944 | 0,161028609 | 0,203531805 |

|           |              |             |             |             |
|-----------|--------------|-------------|-------------|-------------|
| LOC401397 | 0,23591994   | 5,77674242  | 0,161479328 | 0,204063666 |
| RNF20     | -0,173147433 | 6,278792246 | 0,162052053 | 0,204749481 |
| ZBTB10    | -0,298421258 | 4,599250693 | 0,162405854 | 0,205158488 |
| UCP2      | -0,348980014 | 7,363081378 | 0,16246522  | 0,205195468 |
| SDF4      | 0,155222074  | 7,679187461 | 0,162871469 | 0,205670472 |
| THAP6     | 0,176721573  | 4,347082853 | 0,163475515 | 0,206395026 |
| FHL3      | 0,260200701  | 4,827986297 | 0,163970359 | 0,206981466 |
| DRG2      | 0,15800205   | 5,47902709  | 0,164661605 | 0,207815563 |
| SEC24C    | -0,158541003 | 7,499198752 | 0,164751746 | 0,207890851 |
| CMIP      | 0,23151657   | 7,348586097 | 0,164875829 | 0,208008931 |
| UBXN2B    | -0,185316219 | 5,461938402 | 0,164925094 | 0,208032597 |
| BCAR3     | -0,319535876 | 4,95231934  | 0,165006424 | 0,20809669  |
| G3BP2     | -0,174517042 | 7,768205704 | 0,165816276 | 0,209079361 |
| LARS      | 0,168059332  | 7,173411569 | 0,165858795 | 0,20909431  |
| UGGT1     | 0,171692314  | 7,370326234 | 0,16602921  | 0,209270458 |
| PVRIG     | -0,285038514 | 2,052895793 | 0,166502739 | 0,209816485 |
| KHNYN     | -0,175546157 | 6,714885561 | 0,166523951 | 0,209816485 |
| PPM1B     | -0,135105596 | 6,078029759 | 0,167422734 | 0,210909961 |
| PQLC2     | 0,18463129   | 4,467226129 | 0,167969621 | 0,211559817 |
| SETD1A    | 0,201805772  | 5,770930575 | 0,168036983 | 0,211605575 |
| GALNT4    | 0,253672762  | 4,995350977 | 0,168785757 | 0,212509246 |
| GAS2L1    | 0,29668945   | 5,585261435 | 0,168869017 | 0,212574826 |
| MMGT1     | -0,149374012 | 6,145617888 | 0,16921768  | 0,212974412 |
| PRDM4     | -0,155309877 | 5,657191851 | 0,170143419 | 0,214100014 |
| ACBD3     | 0,14819712   | 6,927726395 | 0,170691684 | 0,21473532  |
| ACTN4     | -0,228383422 | 9,663090479 | 0,170711273 | 0,21473532  |
| ZNF192    | -0,237295474 | 4,429193383 | 0,170805119 | 0,214813742 |
| PUM1      | -0,13605099  | 7,008219858 | 0,170957884 | 0,21496622  |
| ATP5E     | 0,211549984  | 8,126830453 | 0,171047222 | 0,215038903 |
| CASP8AP2  | 0,18172574   | 4,760832141 | 0,172130185 | 0,216312902 |
| SVIP      | -0,331819956 | 4,081035006 | 0,172130275 | 0,216312902 |
| ARF1      | 0,137091286  | 9,510294771 | 0,172155759 | 0,216312902 |
| CDK9      | -0,140093287 | 6,178882483 | 0,172219186 | 0,216352732 |
| FKBP9     | 0,331320734  | 8,241294747 | 0,17255009  | 0,216728507 |
| GLCE      | 0,272349832  | 6,125579988 | 0,172708844 | 0,216882124 |
| NPEPL1    | 0,249175721  | 5,405442558 | 0,172736004 | 0,216882124 |
| RASL11A   | -0,466910328 | 4,091466537 | 0,173109047 | 0,217310492 |
| FZD8      | -0,414184299 | 4,113880718 | 0,173554902 | 0,217830089 |
| GPX4      | 0,207557199  | 8,13839369  | 0,173899753 | 0,218222749 |
| RNF5      | 0,226828265  | 5,99217364  | 0,174122933 | 0,218462609 |
| GFPT1     | 0,217639192  | 7,33570312  | 0,174930236 | 0,219435114 |
| ARFGAP2   | -0,149532558 | 6,950112777 | 0,17513357  | 0,219611975 |
| HIGD2A    | 0,198944236  | 5,951188393 | 0,175135638 | 0,219611975 |
| RBM17     | 0,141550762  | 6,63180656  | 0,17531721  | 0,219799238 |
| CTSB      | 0,311328167  | 11,4375597  | 0,175579919 | 0,220088137 |
| KIAA0226  | -0,178897819 | 5,962560688 | 0,175731256 | 0,220237352 |
| FAM32A    | 0,158348553  | 6,835860891 | 0,176169555 | 0,220746085 |
| KDM4A     | 0,224581016  | 6,581922009 | 0,176326686 | 0,220902384 |
| STARD10   | 0,357776373  | 6,586917272 | 0,176724652 | 0,221360287 |
| CLEC2B    | -0,404544279 | 4,975032483 | 0,177682103 | 0,222518689 |



|          |              |             |             |             |
|----------|--------------|-------------|-------------|-------------|
| ZNF841   | 0,242023937  | 3,805603501 | 0,17781341  | 0,222642241 |
| BCAT2    | 0,216337817  | 5,748329398 | 0,178093167 | 0,222951589 |
| PPP3CB   | -0,164760165 | 6,181951    | 0,178131534 | 0,222958688 |
| LUC7L    | 0,226567845  | 4,984526043 | 0,178666446 | 0,223565202 |
| SLC39A9  | 0,151541071  | 7,22610748  | 0,178681676 | 0,223565202 |
| TRAF3IP2 | 0,250754713  | 5,787352712 | 0,178782131 | 0,223649853 |
| DLST     | -0,139340419 | 7,249166199 | 0,179242232 | 0,224184296 |
| USP33    | -0,143383463 | 6,4341469   | 0,179734521 | 0,224758794 |
| DNPEP    | 0,139968315  | 6,714639994 | 0,180538531 | 0,225722817 |
| CHMP5    | 0,283580998  | 7,351754995 | 0,180597438 | 0,225755074 |
| MAP3K1   | -0,205983599 | 5,605592985 | 0,180637898 | 0,225764264 |
| RFXAP    | -0,220482568 | 2,788359507 | 0,18119773  | 0,226422452 |
| CKB      | -0,389476212 | 6,729195765 | 0,18128474  | 0,226489674 |
| DPP7     | -0,195133398 | 6,927376163 | 0,181989385 | 0,227328378 |
| NDUFA4   | 0,281857236  | 7,826632628 | 0,182025023 | 0,227331251 |
| BAZ1A    | 0,199690744  | 6,651699195 | 0,182378874 | 0,227731467 |
| HERC2P2  | 0,346843973  | 5,360519675 | 0,182658183 | 0,228038475 |
| SYMPK    | 0,1854975    | 7,009565254 | 0,182694507 | 0,228042073 |
| VAV2     | -0,302618119 | 5,734686731 | 0,182835876 | 0,228176764 |
| GTF2A1   | 0,223858434  | 3,975522797 | 0,182964472 | 0,228295468 |
| RRN3     | 0,146674624  | 6,053237647 | 0,183050452 | 0,228360964 |
| HACL1    | -0,181390789 | 4,608113939 | 0,183175005 | 0,228474549 |
| TTC1     | -0,156693834 | 5,856103392 | 0,183341971 | 0,228640984 |
| SOCS4    | -0,140242746 | 5,301444861 | 0,183461012 | 0,228747603 |
| RCOR3    | 0,170607467  | 5,555501034 | 0,1840368   | 0,229423572 |
| EIF4B    | -0,149886514 | 9,461125588 | 0,18410335  | 0,229464585 |
| ZNF649   | -0,282842369 | 3,525160796 | 0,184199545 | 0,229542525 |
| UBE2Q2   | 0,2234139    | 6,377253154 | 0,184829566 | 0,230285549 |
| DHRX     | 0,219206213  | 4,916209719 | 0,185396117 | 0,230928708 |
| UBE2D1   | 0,199478952  | 5,182979877 | 0,185437078 | 0,230928708 |
| POLH     | -0,158652315 | 5,239559198 | 0,185447368 | 0,230928708 |
| EDEM2    | -0,180002288 | 6,16829734  | 0,185621301 | 0,231103095 |
| MDC1     | 0,240538776  | 6,109807416 | 0,185758488 | 0,231231677 |
| HINT2    | 0,29978354   | 4,974848331 | 0,185851041 | 0,231304663 |
| CLIC1    | 0,198486185  | 9,172129981 | 0,186489518 | 0,232056938 |
| SRA1     | 0,186930008  | 5,50058652  | 0,186666455 | 0,232234731 |
| WDR36    | 0,128131349  | 5,618858862 | 0,187143681 | 0,232785983 |
| GULP1    | 0,503505848  | 5,46197885  | 0,187443006 | 0,233115786 |
| SEP15    | 0,260997639  | 8,279099736 | 0,188618462 | 0,234534882 |
| ACP2     | -0,186625024 | 6,159330952 | 0,188820156 | 0,23474287  |
| EVI5L    | -0,196732934 | 4,666981494 | 0,188936044 | 0,234844128 |
| MAP2K7   | 0,184794332  | 5,524358425 | 0,189292462 | 0,235244268 |
| TEX261   | -0,149595534 | 7,230467112 | 0,189397224 | 0,235331573 |
| JAK3     | 0,342631049  | 5,146063215 | 0,189732602 | 0,23570534  |
| MFSD10   | -0,193413045 | 6,099688895 | 0,190414527 | 0,23650941  |
| C17orf85 | -0,153174216 | 5,093333265 | 0,190580067 | 0,236641444 |
| USP36    | -0,176013789 | 6,175712923 | 0,190590235 | 0,236641444 |
| IKBIP    | 0,228192749  | 5,121649801 | 0,190670558 | 0,236698077 |
| QARS     | -0,123150619 | 7,608286492 | 0,190717201 | 0,236712886 |
| MT1X     | 0,462222841  | 7,129900606 | 0,190886896 | 0,236878    |

|          |              |             |             |             |
|----------|--------------|-------------|-------------|-------------|
| S100A6   | -0,292869166 | 10,33562523 | 0,190919708 | 0,236878    |
| LAMA5    | 0,329017913  | 7,849780578 | 0,191223151 | 0,237211327 |
| PDPR     | -0,23321361  | 5,989168293 | 0,191373559 | 0,237354728 |
| COPA     | 0,166664173  | 8,705872838 | 0,192449404 | 0,23864566  |
| CTSA     | -0,211646646 | 7,928605419 | 0,192704734 | 0,238918834 |
| PHC1     | -0,145688884 | 6,976905581 | 0,193233762 | 0,23953118  |
| ADAM10   | -0,168743252 | 7,157884567 | 0,193347897 | 0,239629101 |
| ZNF276   | 0,221109007  | 4,863931371 | 0,193822443 | 0,240137848 |
| NID1     | -0,325816987 | 7,364929199 | 0,193828819 | 0,240137848 |
| MMAB     | 0,203786506  | 5,753254336 | 0,19389267  | 0,240173319 |
| TMED4    | 0,136545868  | 6,498152974 | 0,194535322 | 0,240925601 |
| BCL9L    | -0,230348311 | 7,001956403 | 0,194813314 | 0,241226074 |
| TMED10P1 | 0,167421519  | 1,827391805 | 0,194930573 | 0,241327447 |
| AGAP6    | 0,274491214  | 2,877783881 | 0,195099289 | 0,241492476 |
| C5orf15  | 0,179198754  | 6,830175908 | 0,195593548 | 0,242060327 |
| DDX46    | -0,129749307 | 6,289658161 | 0,196133253 | 0,242683884 |
| ATP9A    | -0,230472741 | 6,668714509 | 0,196168583 | 0,242683884 |
| SYVN1    | -0,16891574  | 6,528337029 | 0,196243852 | 0,242721556 |
| ABHD12   | 0,18149429   | 6,570036014 | 0,196270224 | 0,242721556 |
| PPP4R1   | -0,187180327 | 7,499903854 | 0,19653204  | 0,243001266 |
| OAF      | 0,303123423  | 5,371453059 | 0,196973978 | 0,243503545 |
| SEPT2    | -0,138124127 | 9,180124775 | 0,197025858 | 0,243523532 |
| DBNL     | -0,158722971 | 7,471774744 | 0,197118191 | 0,243593502 |
| EXOSC9   | 0,154246489  | 4,916073225 | 0,197279003 | 0,243748056 |
| IFNGR2   | 0,195306174  | 7,299942386 | 0,197592714 | 0,244091434 |
| FKBP8    | -0,154675056 | 8,221535693 | 0,19859328  | 0,245283024 |
| RPS25    | 0,189796454  | 9,366899516 | 0,198771681 | 0,245458909 |
| SOX13    | -0,25780107  | 5,987574654 | 0,199058019 | 0,245767995 |
| FAM126A  | 0,247709159  | 5,79492813  | 0,19968574  | 0,246498382 |
| PELI1    | -0,234999616 | 6,727501648 | 0,200076481 | 0,246936022 |
| FBXW7    | -0,178734185 | 4,775371314 | 0,200415634 | 0,247309846 |
| ATP2B1   | 0,35513328   | 7,188597765 | 0,200723719 | 0,247645204 |
| PPP1R11  | -0,14581298  | 6,696797159 | 0,201074466 | 0,248033065 |
| INTS1    | 0,211806679  | 7,282836248 | 0,201118904 | 0,248043011 |
| HEXIM1   | -0,175392339 | 6,002307262 | 0,201350789 | 0,248284093 |
| PLOD3    | 0,231520323  | 6,842491645 | 0,201801654 | 0,24879506  |
| C14orf93 | 0,163133833  | 3,586709167 | 0,20183942  | 0,248796638 |
| AKIRIN2  | -0,142434638 | 6,086120728 | 0,203627458 | 0,250955293 |
| RAB1B    | -0,134344856 | 8,410639329 | 0,204163535 | 0,2515705   |
| EIF3A    | -0,155449878 | 8,472807659 | 0,204380622 | 0,251792495 |
| UNC5B    | -0,291257307 | 6,352618094 | 0,204995142 | 0,252503951 |
| ZNF428   | 0,21478483   | 4,825408429 | 0,206348417 | 0,254124952 |
| FAM114A1 | 0,230693861  | 5,542599329 | 0,206773974 | 0,254590088 |
| ZNF646   | -0,184766226 | 4,900190033 | 0,206800777 | 0,254590088 |
| PEX3     | 0,20059143   | 4,628110412 | 0,20760256  | 0,255531022 |
| MPDU1    | -0,163526659 | 6,26600695  | 0,20794275  | 0,255903557 |
| FUBP3    | 0,133619962  | 6,252191011 | 0,20799797  | 0,255925327 |
| GPS2     | -0,130614554 | 5,443896963 | 0,208121647 | 0,256009095 |
| GUSBP3   | -0,168445769 | 2,998957054 | 0,208141139 | 0,256009095 |
| CDC40    | 0,149002233  | 5,597627396 | 0,209460513 | 0,257585435 |

|            |              |             |             |             |
|------------|--------------|-------------|-------------|-------------|
| POLG       | 0,157427075  | 6,219517451 | 0,210772461 | 0,259152075 |
| NLRC5      | -0,273846013 | 5,785876857 | 0,210950601 | 0,259300247 |
| FAM160B2   | -0,177539126 | 5,71764186  | 0,210969024 | 0,259300247 |
| RRP8       | 0,137339814  | 4,223863643 | 0,211209069 | 0,259509174 |
| ZC3H4      | -0,161479262 | 5,879211448 | 0,211215122 | 0,259509174 |
| SNAPC3     | 0,193994139  | 5,042135673 | 0,211702225 | 0,260060795 |
| NXN        | -0,242562003 | 6,653593201 | 0,212087508 | 0,260487161 |
| PYROXD1    | 0,172736168  | 5,665801231 | 0,212141131 | 0,2605061   |
| TAF5L      | 0,121606409  | 5,65044914  | 0,212216359 | 0,260551557 |
| LEMD3      | 0,21919611   | 5,862829114 | 0,212338072 | 0,260654062 |
| RPS13      | 0,212108771  | 9,145265649 | 0,21258181  | 0,26089761  |
| EIF1       | -0,148070142 | 9,906361833 | 0,212612996 | 0,26089761  |
| PARP11     | 0,206668894  | 4,390563984 | 0,212820034 | 0,26110468  |
| SPATS2L    | 0,19611629   | 7,30777216  | 0,213031534 | 0,261317148 |
| CDKN2D     | 0,225677524  | 4,086091567 | 0,213262262 | 0,261553123 |
| TMEM55A    | -0,243630038 | 3,590980109 | 0,213580057 | 0,261895775 |
| ZNF22      | -0,186034213 | 5,322761109 | 0,214159392 | 0,262558953 |
| SH3YL1     | -0,255863432 | 5,744499754 | 0,214395898 | 0,262801659 |
| ANKRD17    | -0,172782642 | 7,179728697 | 0,214599566 | 0,262991058 |
| SRGAP1     | 0,263443136  | 4,714813254 | 0,214627546 | 0,262991058 |
| RNF14      | -0,154781664 | 6,020795148 | 0,215524523 | 0,26404271  |
| PRCP       | -0,173857189 | 7,531919843 | 0,215620076 | 0,264112322 |
| TARDBP     | 0,098410385  | 7,665294492 | 0,215862288 | 0,264361519 |
| CYBASC3    | -0,130054764 | 6,382744322 | 0,216168867 | 0,264689442 |
| C11orf74   | -0,175673193 | 3,644140874 | 0,216548008 | 0,26510608  |
| CEPT1      | -0,138930245 | 5,41128466  | 0,217339611 | 0,266027429 |
| GABARAPL2  | -0,204939349 | 6,786276741 | 0,217433931 | 0,266095114 |
| COL1A2     | 0,477600675  | 11,68914833 | 0,217765382 | 0,266442612 |
| IKBKAP     | 0,163825267  | 6,115921372 | 0,217796029 | 0,266442612 |
| SPG7       | 0,142175152  | 6,048300965 | 0,21972951  | 0,268759736 |
| RAB11A     | -0,147317389 | 7,791373149 | 0,220103418 | 0,269168796 |
| UBE3A      | 0,13341769   | 6,872113977 | 0,22106018  | 0,270290365 |
| DCUN1D2    | 0,187152093  | 4,136612966 | 0,221443639 | 0,27071068  |
| BST2       | -0,379007014 | 7,179830016 | 0,221978299 | 0,271315652 |
| NINL       | 0,261665319  | 4,353733194 | 0,222342338 | 0,271711901 |
| SLC38A6    | 0,200033008  | 4,113977629 | 0,222820203 | 0,272247082 |
| COL12A1    | 0,49234351   | 8,109178968 | 0,222994582 | 0,272411332 |
| ANXA7      | 0,168405056  | 7,968221455 | 0,223040578 | 0,272418718 |
| ALG13      | 0,20121548   | 5,053862397 | 0,223208254 | 0,272574693 |
| OBSL1      | 0,267035054  | 6,040230811 | 0,223686868 | 0,273110252 |
| PPP4R2     | 0,130056712  | 5,178759456 | 0,223768492 | 0,273161    |
| ATP6V1E1   | 0,161920852  | 7,793309179 | 0,223990737 | 0,27338336  |
| CWC22      | -0,118463499 | 5,342775724 | 0,224560156 | 0,273980556 |
| ANKRD36BP1 | -0,204494701 | 2,991323401 | 0,224560394 | 0,273980556 |
| SPCS1      | 0,14963628   | 6,817543921 | 0,22486032  | 0,27429741  |
| PLEKHA2    | -0,22584166  | 6,619273108 | 0,225087437 | 0,27452535  |
| KPNA6      | -0,117684455 | 7,044488527 | 0,225183206 | 0,27459304  |
| THAP11     | 0,130290858  | 5,690906956 | 0,225399339 | 0,274779739 |
| ZNF573     | -0,201522035 | 1,05995277  | 0,225416903 | 0,274779739 |
| PI4KAP2    | 0,243676096  | 4,471215218 | 0,225778445 | 0,275171263 |

|           |              |             |             |             |
|-----------|--------------|-------------|-------------|-------------|
| SPIN4     | -0,310468477 | 3,614701566 | 0,225861568 | 0,275223379 |
| COBLL1    | -0,243033491 | 6,35145682  | 0,225961713 | 0,275296216 |
| UBQLN1    | 0,136691168  | 7,775545533 | 0,226087761 | 0,275400579 |
| LOC146880 | 0,193851835  | 4,393284112 | 0,226221631 | 0,275513201 |
| CAMK2G    | -0,145681132 | 5,923933821 | 0,226261024 | 0,275513201 |
| SURF4     | 0,15327454   | 8,754910272 | 0,226331139 | 0,275549373 |
| FOXJ3     | -0,142391359 | 6,442493281 | 0,226527775 | 0,275727308 |
| MAFB      | -0,240480648 | 6,474698144 | 0,226558162 | 0,275727308 |
| HSPA13    | 0,230781328  | 6,209810243 | 0,226649271 | 0,275788969 |
| THG1L     | 0,157948094  | 3,565965615 | 0,228493929 | 0,277983961 |
| STARD7    | 0,169041608  | 8,484832942 | 0,229482439 | 0,279110971 |
| CBY1      | 0,172130974  | 5,253799328 | 0,229502158 | 0,279110971 |
| DGCR11    | -0,193045673 | 1,845461445 | 0,22968068  | 0,279278274 |
| CYB5R1    | -0,21569264  | 6,608648435 | 0,229758749 | 0,279323393 |
| CAPZA2    | -0,21478114  | 7,863332832 | 0,230801657 | 0,280541266 |
| ZNF673    | -0,146140131 | 4,063888946 | 0,231186359 | 0,280958792 |
| TMEM33    | 0,158407938  | 6,811100926 | 0,231736791 | 0,281577544 |
| CCM2      | 0,198008792  | 6,050164192 | 0,232528138 | 0,282488754 |
| ZNF227    | 0,179768687  | 4,09403441  | 0,232667137 | 0,282607269 |
| NUCB2     | -0,198286173 | 6,388450876 | 0,232741137 | 0,282607443 |
| FADS2     | 0,361171865  | 7,571349178 | 0,232750168 | 0,282607443 |
| SPTLC1    | 0,136828594  | 6,972427121 | 0,232814975 | 0,282635804 |
| PEX26     | 0,160694714  | 4,976545033 | 0,233095945 | 0,282926531 |
| CUL4A     | 0,224782824  | 6,93902991  | 0,23433992  | 0,284385819 |
| WTAP      | 0,169114229  | 7,419072908 | 0,234406006 | 0,284415402 |
| TAP2      | -0,209143793 | 7,203670325 | 0,234578124 | 0,284573603 |
| ANKRD27   | 0,18037121   | 6,112903931 | 0,235481602 | 0,285618827 |
| HS1BP3    | -0,150438301 | 5,693075436 | 0,236095467 | 0,286312465 |
| ZNF280D   | -0,134199467 | 5,088703195 | 0,236829401 | 0,287151438 |
| MLLT3     | -0,259190813 | 4,5728407   | 0,237146179 | 0,287484408 |
| TRAM2     | -0,191182252 | 6,448939854 | 0,237324746 | 0,287649741 |
| ZNF45     | -0,159505315 | 4,079381925 | 0,237835576 | 0,288192315 |
| IFRD2     | 0,150112774  | 5,845510611 | 0,237856921 | 0,288192315 |
| ACLY      | 0,166365507  | 7,998998917 | 0,238749992 | 0,289222988 |
| AHI1      | -0,188263241 | 4,151662887 | 0,239152349 | 0,289658946 |
| SHISA4    | -0,248414854 | 3,900087841 | 0,239358081 | 0,289856642 |
| ARMC5     | -0,147769071 | 4,403015746 | 0,239427803 | 0,289889593 |
| ZNF302    | -0,189640803 | 4,664102392 | 0,239470816 | 0,2898902   |
| NMI       | 0,22512654   | 5,360761743 | 0,239532774 | 0,289913735 |
| HCFC1     | 0,179817061  | 7,236567735 | 0,239653397 | 0,290008254 |
| SEMA3C    | 0,381466577  | 6,721423791 | 0,239964802 | 0,290312125 |
| SMCHD1    | -0,170080424 | 6,348699593 | 0,239989654 | 0,290312125 |
| SP1       | -0,115295498 | 7,356636875 | 0,240511855 | 0,29089222  |
| ARHGAP1   | -0,186496961 | 7,640310848 | 0,240634156 | 0,290988528 |
| MSL3      | 0,150220846  | 5,432010431 | 0,24155188  | 0,292046502 |
| FAM134C   | 0,122678978  | 7,004260204 | 0,241750184 | 0,292234445 |
| LOC642852 | 0,245570613  | 3,642962087 | 0,241804124 | 0,292247841 |
| CNPY3     | 0,148280813  | 6,862734093 | 0,241966663 | 0,292392465 |
| CTBS      | -0,166807286 | 5,285952618 | 0,242023789 | 0,292409676 |
| RAB3D     | 0,230664165  | 6,334722848 | 0,24206784  | 0,29241109  |

|           |              |             |             |             |
|-----------|--------------|-------------|-------------|-------------|
| DPAGT1    | 0,145763799  | 5,862583897 | 0,242257117 | 0,2925879   |
| SMAP1     | 0,153591062  | 5,975646383 | 0,242435482 | 0,29275147  |
| ELL2      | -0,219150155 | 7,123768838 | 0,242550041 | 0,292837948 |
| ZNF710    | -0,186313915 | 4,582442479 | 0,243827732 | 0,29432843  |
| DST       | 0,369760312  | 9,064848872 | 0,24403873  | 0,294530991 |
| BRPF3     | -0,179123956 | 5,868138925 | 0,244410027 | 0,294926911 |
| SH3BP4    | 0,206373933  | 6,996827638 | 0,244953479 | 0,295530392 |
| LOC550643 | 0,203665687  | 5,285255175 | 0,245097066 | 0,295651317 |
| AMMECR1L  | 0,113536628  | 5,63869338  | 0,246564661 | 0,297369017 |
| ZNF101    | 0,158811216  | 3,356143021 | 0,246678215 | 0,297453359 |
| ALKBH3    | 0,165365034  | 4,633505598 | 0,247095771 | 0,297904184 |
| DUSP7     | 0,291096407  | 6,262437663 | 0,247612362 | 0,298474226 |
| IGBP1     | 0,143020827  | 6,480852536 | 0,247693063 | 0,298518734 |
| PLEKHF2   | 0,17637314   | 5,837883785 | 0,248492782 | 0,29942963  |
| TBC1D25   | -0,11105529  | 4,966123524 | 0,248556669 | 0,299453697 |
| TMED7     | -0,147596292 | 7,181242281 | 0,249299231 | 0,300295259 |
| YTHDF2    | -0,101801069 | 7,064060823 | 0,249830802 | 0,300882416 |
| CCDC22    | -0,114931055 | 5,008730214 | 0,25041522  | 0,301533001 |
| CCDC111   | 0,164899996  | 3,837629695 | 0,2504834   | 0,301561848 |
| C16orf58  | 0,118840399  | 6,894051747 | 0,250938679 | 0,302056638 |
| RNF216    | 0,124462977  | 6,462110182 | 0,251319838 | 0,30246205  |
| CCND1     | -0,37696004  | 8,504593861 | 0,251454145 | 0,302570286 |
| ERCC6     | 0,163980025  | 4,145024401 | 0,251945482 | 0,303108018 |
| MBD1      | 0,151951233  | 6,183604293 | 0,252198077 | 0,303358385 |
| NME7      | 0,16981503   | 4,755103817 | 0,252414736 | 0,303565447 |
| C7orf29   | 0,294611696  | 3,982769454 | 0,252531699 | 0,303652558 |
| ANKRD10   | -0,197406402 | 6,103481068 | 0,252885294 | 0,30401267  |
| TGFBR1    | -0,201050752 | 6,616129449 | 0,252920352 | 0,30401267  |
| SKIV2L2   | -0,132686125 | 6,324215031 | 0,255130009 | 0,306614652 |
| RELB      | 0,306890881  | 5,725319311 | 0,25519955  | 0,306644182 |
| WDR41     | 0,142245439  | 5,421489931 | 0,255617072 | 0,307091757 |
| AIP       | -0,156583175 | 6,208187871 | 0,256141426 | 0,307650341 |
| TPR       | -0,154997946 | 7,466607989 | 0,25617226  | 0,307650341 |
| PRKRIR    | 0,177010119  | 6,733271759 | 0,256606487 | 0,308117562 |
| ZNF713    | 0,210284005  | 2,523254829 | 0,25675234  | 0,308238417 |
| CD58      | -0,222133395 | 4,662928012 | 0,257609022 | 0,309212449 |
| ZBTB38    | -0,192585766 | 7,320055631 | 0,258119246 | 0,309770352 |
| MMD       | 0,241299322  | 5,184993157 | 0,259130601 | 0,310929362 |
| ELOVL1    | -0,13474876  | 7,043330295 | 0,259402871 | 0,311201298 |
| PHLDA1    | 0,322236148  | 7,665141218 | 0,259669034 | 0,311465812 |
| TRIO      | 0,2393594    | 7,157178335 | 0,260054021 | 0,311872735 |
| POLR2E    | 0,131203886  | 7,274787453 | 0,260160049 | 0,311895032 |
| ABCA11P   | 0,24935889   | 2,888692988 | 0,260164092 | 0,311895032 |
| LDOC1     | 0,365020524  | 5,218739752 | 0,260475564 | 0,312213547 |
| CDK19     | -0,159563441 | 5,279215155 | 0,260693944 | 0,312420387 |
| EPHX1     | -0,2941545   | 8,392489625 | 0,261284662 | 0,313073293 |
| GOLGA2    | -0,13900364  | 6,629295314 | 0,261972281 | 0,313837486 |
| BTAFL1    | -0,130479133 | 5,511300864 | 0,26201449  | 0,313837486 |
| SNX7      | 0,241473851  | 5,011678433 | 0,262951713 | 0,314854433 |
| STRN3     | 0,1580304    | 5,714651377 | 0,262955858 | 0,314854433 |

|          |              |             |             |             |
|----------|--------------|-------------|-------------|-------------|
| DNMBP    | -0,192412024 | 5,434812522 | 0,263229261 | 0,315126463 |
| CLPTM1   | 0,155370015  | 7,649091009 | 0,263393922 | 0,315268238 |
| MFN2     | -0,144772862 | 7,639811066 | 0,265021517 | 0,317108435 |
| BBS7     | -0,122765216 | 4,011540147 | 0,265024339 | 0,317108435 |
| GPR153   | -0,28625451  | 5,190727717 | 0,265429789 | 0,317537847 |
| ZNF23    | -0,141224733 | 3,592647418 | 0,266183047 | 0,318383125 |
| ATP6V1C1 | 0,120704503  | 6,693366688 | 0,26632414  | 0,318496021 |
| CCNG2    | -0,184104981 | 5,693242461 | 0,266692313 | 0,318880393 |
| C2CD3    | -0,162216063 | 5,351719283 | 0,266986871 | 0,319176626 |
| COG1     | -0,123111207 | 5,625777863 | 0,267482372 | 0,319712936 |
| HNRNPU   | 0,114733553  | 9,273345689 | 0,26763838  | 0,319843343 |
| HNRNPA0  | -0,11088936  | 7,593930226 | 0,268242986 | 0,320509711 |
| MED13    | -0,141529676 | 6,962484421 | 0,268313084 | 0,320537302 |
| MGST1    | 0,383852053  | 7,986891833 | 0,268376155 | 0,32055649  |
| TRNAU1AP | 0,19680305   | 4,692330571 | 0,268430193 | 0,320564883 |
| DNTTIP2  | 0,140560252  | 6,772276211 | 0,268491412 | 0,320581849 |
| EFHA1    | -0,156889386 | 5,525169788 | 0,268989545 | 0,321068342 |
| CETN3    | 0,175646657  | 4,17014783  | 0,268993025 | 0,321068342 |
| SNW1     | 0,09672817   | 6,59741349  | 0,269236747 | 0,321303006 |
| GPAM     | -0,201859601 | 4,588120467 | 0,269839856 | 0,321966401 |
| FER      | 0,173193349  | 3,55049689  | 0,270574832 | 0,32273248  |
| ERI1     | -0,140986852 | 4,535984308 | 0,270576564 | 0,32273248  |
| CUL3     | -0,110316867 | 6,785732044 | 0,270626544 | 0,322735642 |
| RNF169   | -0,150532746 | 5,088996726 | 0,270718811 | 0,322789224 |
| ZNF697   | 0,218555715  | 3,808852159 | 0,271011423 | 0,323081625 |
| PPP2R5C  | -0,124495387 | 7,36172512  | 0,271099151 | 0,323129717 |
| SEL1L3   | -0,204115074 | 7,541700262 | 0,271493611 | 0,32354333  |
| ISCA1    | 0,190568456  | 5,744035569 | 0,271935204 | 0,324012958 |
| NFX1     | -0,15548333  | 6,177092197 | 0,272860064 | 0,325058137 |
| EFHD2    | 0,234317841  | 7,572782553 | 0,272993316 | 0,325160074 |
| STX8     | -0,156965807 | 4,904567968 | 0,273134866 | 0,325271857 |
| GGNBP2   | -0,106571235 | 6,326216111 | 0,273266299 | 0,325371554 |
| SPARC    | -0,275019199 | 11,10918278 | 0,273805467 | 0,325956612 |
| TMEM135  | -0,142683843 | 4,702914998 | 0,274009957 | 0,326143114 |
| RSRC2    | 0,096522858  | 6,265731588 | 0,274469898 | 0,326633549 |
| PKIA     | -0,311524351 | 3,724961791 | 0,274686919 | 0,326834775 |
| RSF1     | -0,160185291 | 5,493947053 | 0,274757625 | 0,326861871 |
| SAP30BP  | 0,121283678  | 6,199169062 | 0,275062432 | 0,327167403 |
| UBE2E1   | 0,140673949  | 6,644308067 | 0,27535087  | 0,327453363 |
| FAM82B   | -0,118813641 | 5,622745066 | 0,276240291 | 0,3284538   |
| ARPC2    | 0,13552049   | 9,088768295 | 0,276746648 | 0,328998499 |
| ADAM19   | 0,326696364  | 5,573998986 | 0,276796284 | 0,32900015  |
| ZNF417   | 0,162883673  | 4,024680671 | 0,276869547 | 0,329029878 |
| NFKB2    | -0,215847312 | 6,268329943 | 0,277317979 | 0,329505366 |
| LZTS2    | 0,139781773  | 6,321870734 | 0,277634365 | 0,329823821 |
| COX11    | 0,170029517  | 5,697785678 | 0,278270331 | 0,330521754 |
| PFAS     | 0,169573299  | 4,869690405 | 0,278421366 | 0,330643556 |
| EIF3F    | 0,130308926  | 7,945085301 | 0,279661638 | 0,33205863  |
| B3GALT6  | 0,165848182  | 4,943492443 | 0,279893448 | 0,332276014 |
| NR1D2    | -0,170758799 | 6,131809633 | 0,280290171 | 0,332689064 |

|          |              |             |             |             |
|----------|--------------|-------------|-------------|-------------|
| ALDH9A1  | -0,141783891 | 7,089499724 | 0,280866015 | 0,333293703 |
| RPL32    | 0,18285449   | 9,979234782 | 0,280908838 | 0,333293703 |
| COX15    | 0,110750371  | 6,017862899 | 0,28094621  | 0,333293703 |
| CDKN2AIP | -0,13496052  | 4,899413484 | 0,281125208 | 0,333448041 |
| UBTF     | 0,119481439  | 7,338569937 | 0,281312926 | 0,333612668 |
| SELK     | -0,17198099  | 5,7545949   | 0,281520382 | 0,333800641 |
| SPG21    | 0,111802637  | 7,288319496 | 0,282347874 | 0,334723602 |
| ANGEL2   | 0,117746821  | 5,236259675 | 0,282955414 | 0,335385532 |
| SETD5    | 0,139088632  | 6,956306703 | 0,283277382 | 0,335708805 |
| ALG1     | 0,122357245  | 5,691225793 | 0,283790713 | 0,336258709 |
| NAPEPLD  | -0,136473865 | 4,624954069 | 0,2844031   | 0,336925771 |
| REST     | -0,172242467 | 4,312299051 | 0,284631289 | 0,33713753  |
| NINJ1    | -0,171543477 | 6,378893005 | 0,284915731 | 0,337415833 |
| ADAM15   | 0,200603508  | 7,626378757 | 0,285011247 | 0,33747034  |
| ZC3H11A  | 0,130673477  | 7,706491034 | 0,285089764 | 0,337504705 |
| SLC35E1  | -0,121396633 | 7,042303937 | 0,285583587 | 0,338030634 |
| LSM6     | 0,149078648  | 4,36781392  | 0,285811709 | 0,338241937 |
| YME1L1   | 0,106154961  | 7,751104256 | 0,286053222 | 0,338469013 |
| EPHB4    | 0,213276628  | 7,313920767 | 0,28631605  | 0,338721225 |
| MIOS     | 0,117569506  | 5,25335051  | 0,287587776 | 0,340166704 |
| LGALS3BP | -0,171289855 | 9,831752895 | 0,287857104 | 0,340426222 |
| ENTPD4   | 0,126408453  | 5,246203209 | 0,288257354 | 0,340840453 |
| FTSJD1   | -0,145668243 | 5,218901125 | 0,288676958 | 0,341277423 |
| STRN     | 0,174392191  | 4,858506047 | 0,28923606  | 0,341879129 |
| TIAM1    | -0,245036829 | 4,964820373 | 0,289913904 | 0,342620955 |
| DTX3L    | -0,170938958 | 7,341980468 | 0,290046156 | 0,342717855 |
| PTPN3    | -0,165241907 | 5,636348416 | 0,290564429 | 0,343270763 |
| RPS27    | 0,175773555  | 10,08825414 | 0,29062875  | 0,343287276 |
| CCDC57   | 0,193496147  | 4,633551192 | 0,291321608 | 0,344046076 |
| MAPK1    | -0,120896257 | 7,915768849 | 0,291398021 | 0,344076728 |
| BSCL2    | -0,156542233 | 6,448030258 | 0,29145052  | 0,344079137 |
| OAS1     | 0,305185713  | 6,193475377 | 0,292286054 | 0,345005817 |
| MYO1E    | 0,195116323  | 6,301271806 | 0,292827742 | 0,345568147 |
| AKIRIN1  | -0,141895422 | 6,656640056 | 0,29286381  | 0,345568147 |
| PPARA    | 0,149578526  | 5,559927458 | 0,295119663 | 0,348169721 |
| STIM2    | -0,169085235 | 5,645466524 | 0,295925642 | 0,34906019  |
| C7orf31  | -0,185491624 | 2,916134623 | 0,296747725 | 0,349964948 |
| RNF13    | -0,161988466 | 7,391182348 | 0,296795321 | 0,349964948 |
| RALGAPB  | -0,120909765 | 6,698995575 | 0,297039084 | 0,350191825 |
| FAM43A   | 0,361657363  | 5,543114211 | 0,29861581  | 0,351975411 |
| DENND4B  | -0,121633322 | 6,050844184 | 0,298655188 | 0,351975411 |
| VPS28    | 0,154174571  | 6,979398854 | 0,299395772 | 0,352787242 |
| RAD50    | -0,126536314 | 5,928671688 | 0,299942928 | 0,35337091  |
| DYRK1B   | 0,220152741  | 4,945974403 | 0,300166313 | 0,353572998 |
| RGS1     | 0,351224207  | 7,013497848 | 0,300411981 | 0,353753866 |
| ACVR1B   | 0,14138583   | 6,302256654 | 0,300423616 | 0,353753866 |
| ATF6B    | 0,13268322   | 7,102658218 | 0,301089445 | 0,354476679 |
| ETHE1    | 0,223246768  | 5,479508036 | 0,301459462 | 0,354851039 |
| KLF3     | -0,13691932  | 7,008354745 | 0,301769761 | 0,355154988 |
| SF3B1    | 0,095116208  | 8,58727091  | 0,302384256 | 0,355816781 |

|           |              |             |             |             |
|-----------|--------------|-------------|-------------|-------------|
| MTMR12    | -0,147323355 | 6,601840738 | 0,303648568 | 0,357242855 |
| DNAJC14   | 0,085764042  | 6,658002478 | 0,303787236 | 0,357344344 |
| FBXO42    | -0,096822958 | 5,084122774 | 0,304593937 | 0,358231469 |
| APP       | -0,176483832 | 10,27492611 | 0,30505822  | 0,358715641 |
| RAB21     | -0,115880382 | 6,501802905 | 0,305457913 | 0,359123708 |
| RASA2     | -0,144914655 | 3,4835154   | 0,305878529 | 0,35955623  |
| CSNK1A1   | 0,119063873  | 8,503279977 | 0,306312683 | 0,360004513 |
| UBIAD1    | -0,093455361 | 4,987186474 | 0,306529076 | 0,360196755 |
| PEX12     | 0,147521269  | 3,769946675 | 0,306597825 | 0,360215467 |
| SEC23A    | 0,18684139   | 6,671452018 | 0,306891277 | 0,360498125 |
| HDLBP     | 0,148228872  | 9,76435904  | 0,308341257 | 0,362139    |
| SEC23B    | -0,108591225 | 6,969230029 | 0,308481805 | 0,362241678 |
| NUS1      | 0,126385411  | 7,093203326 | 0,30871509  | 0,362453202 |
| LOC349196 | -0,217981491 | 3,346853975 | 0,308981622 | 0,36270368  |
| MALAT1    | -0,233745146 | 7,103153079 | 0,309165112 | 0,3627886   |
| FBXO3     | -0,131828424 | 5,369689417 | 0,309178607 | 0,3627886   |
| NUDC      | 0,130452404  | 7,047213895 | 0,309213571 | 0,3627886   |
| PHRF1     | -0,152722372 | 5,971501792 | 0,309703043 | 0,36330037  |
| SFT2D2    | 0,137768834  | 3,021323101 | 0,310073444 | 0,36367231  |
| CD200     | -0,299281978 | 4,509233856 | 0,312297664 | 0,366158405 |
| MFGE8     | -0,191078246 | 7,061366152 | 0,312300526 | 0,366158405 |
| GOLGA3    | -0,131184255 | 6,941575403 | 0,312878319 | 0,366772779 |
| NLK       | -0,131498558 | 4,759068371 | 0,313742517 | 0,367722623 |
| RNFT1     | 0,188381624  | 4,5915016   | 0,313853873 | 0,367789922 |
| MMS19     | 0,114513437  | 6,339477984 | 0,313919384 | 0,367803484 |
| PRPF38B   | -0,104663308 | 5,901084468 | 0,314098201 | 0,367949774 |
| LMAN2     | 0,131052966  | 7,655706691 | 0,31442031  | 0,368263843 |
| TSR2      | -0,119862207 | 5,92220719  | 0,315372056 | 0,369315138 |
| MED25     | -0,132335291 | 5,684162259 | 0,316095868 | 0,370099197 |
| BBX       | -0,128260943 | 6,630354768 | 0,316239057 | 0,370203284 |
| SBNO2     | -0,163543381 | 6,920943058 | 0,318045691 | 0,372254303 |
| EML4      | -0,126519065 | 7,267179067 | 0,318268175 | 0,372383158 |
| NPIP      | -0,182415103 | 4,852627924 | 0,318308639 | 0,372383158 |
| ZDHHC9    | -0,172473488 | 6,819598144 | 0,318319611 | 0,372383158 |
| LPAR6     | 0,286281467  | 5,427388325 | 0,31921135  | 0,373362297 |
| CCDC7     | 0,167643774  | 0,865701523 | 0,319586601 | 0,373737101 |
| MED4      | 0,118689177  | 5,91601312  | 0,319658342 | 0,373756899 |
| FAM134A   | -0,104585192 | 7,226712161 | 0,319739496 | 0,373787695 |
| SLC25A19  | 0,167517453  | 4,512267504 | 0,320127577 | 0,374176478 |
| TWSG1     | 0,161917195  | 6,600653394 | 0,320181808 | 0,374176478 |
| PHACTR4   | -0,109120077 | 6,339696156 | 0,32041861  | 0,374389051 |
| EIF3G     | 0,137464221  | 7,277927264 | 0,320650361 | 0,37459565  |
| MKNK2     | -0,183848847 | 7,98128902  | 0,321530042 | 0,375558986 |
| NCOA3     | 0,176104414  | 6,92818779  | 0,321708533 | 0,375703114 |
| WWP1      | -0,132221633 | 6,470879322 | 0,321898995 | 0,375861172 |
| DNAJC7    | 0,112941811  | 6,58064273  | 0,322239501 | 0,376143076 |
| ATP6V1A   | 0,124870627  | 7,458943734 | 0,322250748 | 0,376143076 |
| STEAP3    | 0,219870995  | 6,48350206  | 0,322315717 | 0,376154522 |
| TSC22D4   | 0,130698373  | 6,056044386 | 0,322855459 | 0,376719948 |
| APOL4     | -0,227379132 | 5,619951519 | 0,32306328  | 0,376897948 |



|          |              |             |             |             |
|----------|--------------|-------------|-------------|-------------|
| TMED10   | 0,122609915  | 9,111591479 | 0,323666053 | 0,377536575 |
| SLC39A7  | 0,137998598  | 7,857170453 | 0,324368335 | 0,378291034 |
| ANAPC2   | -0,115898663 | 5,186365541 | 0,325116676 | 0,379087916 |
| MIER2    | -0,117244703 | 4,831365419 | 0,325162813 | 0,379087916 |
| XRN1     | 0,128498974  | 6,253235843 | 0,326108574 | 0,380125533 |
| STUB1    | 0,132745966  | 6,654353037 | 0,327173984 | 0,381302239 |
| RPL22    | 0,128304248  | 9,268249177 | 0,327631765 | 0,381770507 |
| BAG1     | -0,178472837 | 6,794927213 | 0,32822804  | 0,382399967 |
| CEP350   | -0,120110362 | 6,137272658 | 0,328651029 | 0,38282736  |
| GNB4     | -0,193068116 | 6,727287217 | 0,328828962 | 0,382969205 |
| SRRM1    | -0,096127416 | 6,951975885 | 0,328986156 | 0,383086851 |
| C7orf26  | 0,11331458   | 5,268744694 | 0,330736007 | 0,385058704 |
| VDR      | -0,215030832 | 5,675351728 | 0,331367395 | 0,385727938 |
| WBP5     | 0,16747987   | 6,36536127  | 0,33220867  | 0,386641222 |
| DOCK7    | 0,128916119  | 5,688199829 | 0,332702959 | 0,387150423 |
| CYTH2    | -0,108760174 | 6,382519352 | 0,332949479 | 0,387371182 |
| NCDN     | -0,129140031 | 5,287172373 | 0,333254736 | 0,387660192 |
| INTS3    | -0,114011554 | 6,898453533 | 0,333553794 | 0,387941893 |
| FTH1     | -0,160429213 | 12,18384005 | 0,334141868 | 0,388559584 |
| OSMR     | -0,226282403 | 7,128518288 | 0,334765591 | 0,38921851  |
| CISD3    | 0,150046731  | 5,291148378 | 0,335046614 | 0,389429475 |
| ARHGAP4  | -0,247570953 | 5,374845217 | 0,335067115 | 0,389429475 |
| SNHG8    | 0,172914057  | 5,099688746 | 0,335118369 | 0,389429475 |
| SHMT1    | 0,166299876  | 5,542808775 | 0,336132541 | 0,390541455 |
| IPO8     | -0,10750631  | 6,512953705 | 0,33628659  | 0,390653877 |
| CCL5     | -0,270951319 | 6,534887516 | 0,336686617 | 0,391051957 |
| HOMER1   | 0,154903048  | 4,382765012 | 0,337002542 | 0,391352237 |
| WARS2    | 0,138469407  | 4,567712942 | 0,337892898 | 0,392319372 |
| IPO7     | 0,118306491  | 8,064593266 | 0,337983864 | 0,392358183 |
| HUWE1    | -0,148655949 | 8,497051932 | 0,338271369 | 0,3926251   |
| TSPO     | 0,202276354  | 7,386482358 | 0,338453029 | 0,392769095 |
| ACVR1    | 0,148726869  | 6,273723327 | 0,339582087 | 0,394012294 |
| SFRP4    | 0,406781327  | 6,204226943 | 0,339807013 | 0,394132681 |
| GTF2I    | 0,117468619  | 8,454322026 | 0,339839869 | 0,394132681 |
| LARPI    | 0,142813442  | 8,117472872 | 0,339859241 | 0,394132681 |
| ATG10    | 0,139358672  | 3,447818079 | 0,340147111 | 0,394390872 |
| RNF6     | -0,114711644 | 5,890665431 | 0,340197552 | 0,394390872 |
| PITRM1   | 0,150056234  | 6,786624759 | 0,341981854 | 0,396392021 |
| PRPF6    | -0,120906506 | 7,367726635 | 0,342237778 | 0,396621245 |
| GALT     | -0,168381073 | 4,618090434 | 0,342751469 | 0,397149069 |
| PTPMT1   | -0,113638495 | 5,779824173 | 0,342962932 | 0,397326577 |
| PFN1     | 0,110856182  | 9,683001824 | 0,343561089 | 0,397951939 |
| STK19    | -0,122051112 | 4,462480478 | 0,34477067  | 0,39928519  |
| ZMYM6    | -0,091640431 | 4,825652227 | 0,345360197 | 0,39988639  |
| KIAA1671 | 0,235008633  | 7,210026156 | 0,345407074 | 0,39988639  |
| TM4SF1   | -0,258081061 | 9,337215342 | 0,345835049 | 0,400313903 |
| CDK18    | -0,211353888 | 5,299970314 | 0,346772337 | 0,401330714 |
| RAB11B   | -0,130485022 | 6,992039301 | 0,34756883  | 0,402184262 |
| HADH     | 0,162463945  | 6,313319546 | 0,347634415 | 0,402191902 |
| RAB7L1   | -0,133508686 | 5,466789882 | 0,347730748 | 0,40223511  |

|              |              |             |             |             |
|--------------|--------------|-------------|-------------|-------------|
| FAM48A       | -0,105036409 | 5,553397646 | 0,348560414 | 0,403126436 |
| CIQTNF3      | 0,369711089  | 4,019802611 | 0,349306048 | 0,403920289 |
| PSMB9        | 0,303404454  | 6,505154767 | 0,350669368 | 0,405392546 |
| ALDH7A1      | -0,274952728 | 5,715274018 | 0,350698142 | 0,405392546 |
| TCTN2        | -0,12625169  | 4,858637706 | 0,3508965   | 0,405553091 |
| LOC100190986 | -0,185874996 | 2,811821796 | 0,352088321 | 0,406861593 |
| UPF2         | -0,119836356 | 5,671643954 | 0,353303725 | 0,408196899 |
| SETMAR       | 0,140260699  | 4,321594699 | 0,356119386 | 0,411380331 |
| DCBLD2       | 0,235313389  | 6,772728732 | 0,356183352 | 0,411384533 |
| ZNF780B      | 0,171688215  | 4,2927996   | 0,356822269 | 0,412052676 |
| C11orf49     | -0,132113144 | 5,206847817 | 0,357117942 | 0,412324288 |
| TOX4         | -0,092744641 | 6,923011134 | 0,357257837 | 0,412415979 |
| ZNF564       | -0,117981121 | 3,686705596 | 0,357853914 | 0,413034164 |
| DOT1L        | -0,160931039 | 5,724506949 | 0,358005398 | 0,413139077 |
| CTNNBIP1     | -0,140970206 | 6,342987728 | 0,358500216 | 0,413640097 |
| EYA3         | 0,13064301   | 3,601128961 | 0,358883515 | 0,414012297 |
| ZNF304       | -0,135637875 | 4,41021619  | 0,359057187 | 0,414142584 |
| COL6A2       | -0,250140404 | 9,39661184  | 0,360066505 | 0,415236512 |
| NMT1         | 0,094763744  | 7,444061893 | 0,360470884 | 0,41563256  |
| C1S          | -0,215856295 | 9,298716943 | 0,360795934 | 0,415937021 |
| B3GALT4      | -0,153698205 | 4,21603294  | 0,36092191  | 0,416011917 |
| GPBP1L1      | -0,10097147  | 7,407061347 | 0,361129553 | 0,416180906 |
| LZTR1        | 0,146585876  | 5,922442842 | 0,362645464 | 0,417857286 |
| DDX51        | 0,140607464  | 5,10124365  | 0,363428728 | 0,418689052 |
| RREB1        | -0,133489712 | 6,2247133   | 0,36369268  | 0,418922363 |
| CDK13        | 0,102353457  | 6,098273226 | 0,363757249 | 0,418925972 |
| LONP2        | 0,10246932   | 6,345629169 | 0,365758053 | 0,421151352 |
| IFT74        | -0,193654883 | 3,876512248 | 0,36581309  | 0,421151352 |
| ERBB2        | -0,189507083 | 7,56096535  | 0,366043835 | 0,421345866 |
| DNAJC16      | -0,091111191 | 5,237696469 | 0,366146455 | 0,421388321 |
| BFAR         | -0,086896934 | 6,66166639  | 0,36620431  | 0,421388321 |
| GMPR2        | -0,113766959 | 6,314312972 | 0,366789129 | 0,421990058 |
| HEXDC        | 0,178002582  | 4,089445057 | 0,366886107 | 0,422030425 |
| OXR1         | 0,128347519  | 6,166665104 | 0,369475399 | 0,424870735 |
| GJA1         | 0,304704864  | 9,112814737 | 0,369497615 | 0,424870735 |
| MTX3         | 0,110584757  | 4,869786784 | 0,36954221  | 0,424870735 |
| CAPZB        | -0,092376748 | 8,32499194  | 0,370039685 | 0,425370973 |
| AMIGO2       | -0,280040944 | 5,693499348 | 0,371437973 | 0,426906378 |
| ATG9A        | 0,114131158  | 6,507476993 | 0,372072261 | 0,427563321 |
| GOPC         | 0,102163493  | 5,902056441 | 0,372256076 | 0,427702474 |
| TNRC6A       | -0,121922597 | 5,815078143 | 0,372526843 | 0,427941466 |
| NFE2L1       | 0,137913538  | 9,060165336 | 0,372757843 | 0,428134703 |
| UBA1         | 0,109146107  | 8,835253865 | 0,373176671 | 0,428543571 |
| ATL3         | 0,188076915  | 5,575961759 | 0,374409217 | 0,429886588 |
| OSBPL8       | -0,094551485 | 6,892677845 | 0,374493303 | 0,429910746 |
| RAB40C       | 0,145201472  | 5,460346779 | 0,374712705 | 0,43009021  |
| CWC27        | -0,090802392 | 4,796667458 | 0,374836235 | 0,430159591 |
| SMURF1       | -0,126315514 | 6,602991128 | 0,37491959  | 0,430182852 |
| ZNF430       | 0,173162738  | 3,486442744 | 0,375770472 | 0,431086616 |
| ZNF81        | 0,121103248  | 2,954624289 | 0,375977073 | 0,431251078 |

|          |              |             |             |             |
|----------|--------------|-------------|-------------|-------------|
| ZFP112   | 0,195672239  | 2,586239437 | 0,376516879 | 0,431797612 |
| GATSL3   | 0,167407943  | 4,438196998 | 0,376920603 | 0,432187926 |
| APEH     | -0,093523999 | 6,749886343 | 0,377080367 | 0,432298424 |
| SEPW1    | -0,18098451  | 8,061420195 | 0,378058176 | 0,433346563 |
| UBN2     | 0,125076231  | 5,142749918 | 0,378227679 | 0,433467991 |
| SPIN1    | -0,09220434  | 7,053521265 | 0,379141949 | 0,434442774 |
| MLLT10   | -0,108239315 | 5,345727511 | 0,379780211 | 0,435101018 |
| USP3     | 0,097248768  | 5,432378848 | 0,381162324 | 0,436611101 |
| USP7     | 0,113692681  | 7,451478395 | 0,382081557 | 0,437517775 |
| GSDMD    | -0,150526674 | 6,422441852 | 0,382082175 | 0,437517775 |
| ZXDC     | 0,122455793  | 6,421041003 | 0,382345348 | 0,437745622 |
| ZFC3H1   | -0,119127512 | 5,239717631 | 0,382513518 | 0,437864643 |
| TMEM167A | -0,103110092 | 7,153012367 | 0,383626922 | 0,439065455 |
| REXO1    | 0,133460069  | 5,42065253  | 0,384552963 | 0,440051461 |
| GAL3ST4  | 0,173685128  | 4,618735309 | 0,385287775 | 0,440818345 |
| HMGCS1   | 0,230535624  | 7,912132395 | 0,385673127 | 0,441185213 |
| SLC25A37 | -0,159035788 | 4,98235047  | 0,385972196 | 0,441453271 |
| CXXC5    | -0,223442315 | 4,196155226 | 0,386106443 | 0,441532758 |
| EIF4H    | 0,087851939  | 9,069798807 | 0,386315281 | 0,441697501 |
| ATP6V0C  | -0,108170331 | 7,326664535 | 0,387931222 | 0,443470746 |
| SKIL     | 0,15222675   | 6,01201214  | 0,389063566 | 0,444690657 |
| CUTC     | -0,124684734 | 4,322869406 | 0,390078777 | 0,445734945 |
| LGALS8   | 0,11133185   | 6,294882043 | 0,390107956 | 0,445734945 |
| COQ2     | 0,128109434  | 4,148126926 | 0,391260587 | 0,446939385 |
| MALT1    | 0,142977966  | 5,620596266 | 0,39129317  | 0,446939385 |
| MGA      | -0,109541446 | 5,796831767 | 0,391879067 | 0,447447793 |
| EXOC1    | 0,124776533  | 5,903205419 | 0,391933583 | 0,447447793 |
| CLINT1   | -0,096660206 | 7,123245368 | 0,391935133 | 0,447447793 |
| EIF3L    | -0,105308135 | 8,89967153  | 0,392317261 | 0,447809073 |
| ZNF177   | 0,22863184   | 1,921691676 | 0,393212231 | 0,448755515 |
| GDAP2    | -0,091940313 | 4,724604328 | 0,39360422  | 0,449127707 |
| CHMP2B   | -0,169751711 | 6,157261437 | 0,393878378 | 0,449365344 |
| RBCK1    | 0,111759518  | 6,96613235  | 0,395369549 | 0,450991126 |
| DGCR2    | -0,116648896 | 7,678864804 | 0,395803423 | 0,451410527 |
| CES2     | -0,153866762 | 6,322855184 | 0,397115488 | 0,452831189 |
| CHST3    | 0,245469873  | 5,833932502 | 0,398834609 | 0,454715465 |
| ZNF614   | 0,183677421  | 4,260759105 | 0,399166604 | 0,455017899 |
| RXRB     | 0,108934188  | 6,065650971 | 0,399299878 | 0,455093744 |
| PIM3     | -0,13364746  | 7,011647171 | 0,400602656 | 0,456502258 |
| COL16A1  | 0,275752673  | 6,409930272 | 0,400708547 | 0,456546631 |
| ARID4B   | -0,07507226  | 6,341542767 | 0,400889011 | 0,456675938 |
| MFHAS1   | -0,169820853 | 5,817961698 | 0,401637278 | 0,457451912 |
| BIVM     | -0,120503023 | 4,538962495 | 0,402800048 | 0,458699654 |
| ZMPSTE24 | 0,133656976  | 6,821048748 | 0,403228509 | 0,459047026 |
| DPY19L1  | -0,170718794 | 6,245243638 | 0,403239725 | 0,459047026 |
| INTS12   | -0,084181578 | 4,642031353 | 0,403530898 | 0,459301818 |
| NUP188   | 0,132257303  | 6,873550062 | 0,404358975 | 0,460167532 |
| ZNF616   | 0,128872687  | 3,633027965 | 0,404550441 | 0,460308603 |
| TREX1    | -0,115990999 | 4,376398892 | 0,40500423  | 0,460748055 |
| PTPLB    | 0,156685505  | 4,663964202 | 0,405503704 | 0,461239326 |

|              |              |             |             |             |
|--------------|--------------|-------------|-------------|-------------|
| ANP32A       | 0,107445461  | 7,433275407 | 0,406252385 | 0,462013845 |
| ZNF586       | 0,152431121  | 3,663422724 | 0,406331516 | 0,462026781 |
| FAM111A      | -0,129119924 | 5,676874497 | 0,406528609 | 0,462173822 |
| ZFP1         | 0,117919172  | 3,946415991 | 0,406694968 | 0,462285879 |
| PDLIM7       | 0,172451992  | 5,999688394 | 0,408043898 | 0,46374189  |
| ZNF629       | -0,131724038 | 5,541439878 | 0,408504878 | 0,464188429 |
| LMBR1L       | 0,110666707  | 4,761919109 | 0,408660442 | 0,46428783  |
| ADAM9        | 0,208850218  | 8,292189085 | 0,409403343 | 0,465054372 |
| CEP290       | -0,122818032 | 4,339387931 | 0,410012678 | 0,465668962 |
| RER1         | 0,102359354  | 7,260328821 | 0,410628471 | 0,466290682 |
| PHF21A       | -0,109395601 | 5,74787883  | 0,411053217 | 0,466695286 |
| CARHSP1      | -0,121588597 | 6,545044987 | 0,411952946 | 0,467638944 |
| BRD1         | 0,119305787  | 5,852311684 | 0,414002001 | 0,469886758 |
| ZNF394       | -0,079008987 | 4,851930734 | 0,414603964 | 0,470491668 |
| HNRNPUL2     | -0,111707964 | 7,615536111 | 0,417182821 | 0,473339378 |
| ZDHHC6       | 0,100661301  | 5,527100074 | 0,417504317 | 0,473625343 |
| ZFYVE21      | -0,114255213 | 5,788266825 | 0,417904425 | 0,474000379 |
| FBXL12       | -0,092352973 | 4,564065454 | 0,418777374 | 0,474845609 |
| ZSCAN29      | 0,099802431  | 4,993631594 | 0,418788898 | 0,474845609 |
| PCIF1        | -0,081032054 | 6,209458113 | 0,420498886 | 0,476705221 |
| EPHA2        | -0,204749612 | 6,815417166 | 0,421752782 | 0,478047245 |
| ZBTB37       | -0,113643925 | 0,876720052 | 0,421896212 | 0,478123898 |
| AGAP5        | 0,149925624  | 2,29031489  | 0,421960642 | 0,478123898 |
| GNB2L1       | 0,116661001  | 10,37106199 | 0,422235551 | 0,47835591  |
| CLCN3        | -0,116009607 | 6,189793317 | 0,422491651 | 0,47856654  |
| PANK4        | 0,094175237  | 4,734781137 | 0,422695438 | 0,478717853 |
| PLK2         | -0,192278731 | 6,184296108 | 0,423147634 | 0,479150402 |
| FRG1         | -0,089023089 | 5,308910093 | 0,424050511 | 0,48009305  |
| POLR2A       | -0,123304405 | 8,532572288 | 0,425811298 | 0,482006514 |
| NEURL4       | -0,088165733 | 5,086688659 | 0,42669554  | 0,482927284 |
| WASL         | -0,092296939 | 6,652187406 | 0,427285905 | 0,483515198 |
| CUL5         | 0,095207886  | 5,869997804 | 0,427476226 | 0,483532351 |
| BIRC2        | 0,145165792  | 6,593251132 | 0,427543637 | 0,483532351 |
| KDELC2       | 0,127543124  | 6,43532332  | 0,427557697 | 0,483532351 |
| MYC          | 0,186053998  | 7,690950083 | 0,427584701 | 0,483532351 |
| SLC12A9      | -0,098579349 | 5,776838223 | 0,428305143 | 0,48426675  |
| FAM175B      | -0,070535835 | 4,990309768 | 0,428684401 | 0,484591683 |
| LOC100288778 | 0,132238626  | 4,572412794 | 0,428734656 | 0,484591683 |
| ZNF395       | -0,133532187 | 6,702741897 | 0,429234262 | 0,485075975 |
| BAZ1B        | 0,103219419  | 7,239056429 | 0,430624338 | 0,486566257 |
| FAM104B      | 0,12043189   | 4,052144396 | 0,430785347 | 0,486667542 |
| RCL1         | 0,138168403  | 5,012137757 | 0,431281516 | 0,487147367 |
| OAZ1         | 0,115057494  | 9,604160271 | 0,431487368 | 0,487299165 |
| ZFP91        | 0,077379454  | 7,189568663 | 0,432102978 | 0,487913596 |
| NUFIP2       | -0,088160935 | 7,178653617 | 0,432214676 | 0,48795892  |
| COG8         | -0,066696393 | 4,661461871 | 0,433245801 | 0,489042065 |
| PTDSS2       | -0,112636133 | 4,896131224 | 0,43361344  | 0,489376042 |
| ICMT         | 0,089514757  | 7,251683752 | 0,433736422 | 0,489433834 |
| DHRS4        | -0,11835724  | 5,109742239 | 0,433897381 | 0,489534454 |
| ZNF678       | -0,103490584 | 2,102087628 | 0,434522711 | 0,490121422 |

|          |              |             |             |             |
|----------|--------------|-------------|-------------|-------------|
| SEC62    | -0,103191502 | 8,126488713 | 0,43456139  | 0,490121422 |
| RAB13    | -0,082879931 | 7,016616483 | 0,435028018 | 0,490566571 |
| HAUS2    | 0,084534835  | 5,754682503 | 0,435783537 | 0,491337292 |
| FAM127C  | 0,134289824  | 4,946851329 | 0,436985214 | 0,492610709 |
| PDS5A    | -0,087834472 | 7,420548009 | 0,437304463 | 0,492889113 |
| TRIM47   | 0,205743092  | 5,555462969 | 0,438251214 | 0,493874571 |
| RBM25    | 0,080960261  | 6,66340391  | 0,438646118 | 0,494237917 |
| UGP2     | 0,131356414  | 7,496704249 | 0,439967162 | 0,49557255  |
| ARID1A   | -0,117081426 | 7,313208148 | 0,439975981 | 0,49557255  |
| XPO7     | 0,089107411  | 6,858850279 | 0,44018551  | 0,495726671 |
| RBM33    | -0,086250562 | 6,004755008 | 0,440793595 | 0,496329511 |
| SNX13    | -0,088143606 | 6,003235911 | 0,441854847 | 0,497442331 |
| JKAMP    | -0,091015097 | 5,843614978 | 0,442857029 | 0,498448726 |
| SNAP29   | 0,103225998  | 6,07996614  | 0,442957251 | 0,498448726 |
| CNOT1    | 0,099315051  | 8,235254123 | 0,442968072 | 0,498448726 |
| PCMT1    | 0,104266699  | 6,548968173 | 0,44383372  | 0,499296655 |
| LILRB4   | 0,250945775  | 5,428883352 | 0,443868063 | 0,499296655 |
| CELF1    | 0,097059823  | 6,855648177 | 0,444553005 | 0,499984651 |
| CHFR     | 0,129167408  | 5,191874089 | 0,444776994 | 0,500154076 |
| MFSD11   | 0,078192039  | 5,589766346 | 0,445219439 | 0,500569061 |
| ZNF571   | -0,15136434  | 2,63947044  | 0,445367832 | 0,500653354 |
| MLH3     | -0,089359266 | 4,417184533 | 0,445745558 | 0,500995379 |
| ARL2BP   | -0,096192823 | 6,860523974 | 0,446339455 | 0,501580215 |
| BRD7     | 0,093276224  | 6,546733454 | 0,446702631 | 0,501905625 |
| SH3BGRL3 | -0,117783908 | 8,472664869 | 0,447870864 | 0,503135325 |
| SMARCAL1 | 0,079584706  | 5,172819282 | 0,448809556 | 0,504106796 |
| CDC42    | -0,100932015 | 9,004727689 | 0,449672113 | 0,504992447 |
| LOC90834 | 0,13120013   | 2,137407784 | 0,450024453 | 0,505304915 |
| PI4KB    | 0,075804613  | 6,964075292 | 0,450144929 | 0,505356976 |
| GLG1     | -0,100077664 | 8,381361991 | 0,450225809 | 0,505364575 |
| ZNF664   | -0,098393214 | 7,599695335 | 0,450479122 | 0,505565669 |
| HARS2    | 0,081167237  | 5,149209645 | 0,450731108 | 0,505765251 |
| RBM7     | -0,094833048 | 5,604164748 | 0,451231802 | 0,506243774 |
| NF1      | 0,133502128  | 6,881574952 | 0,453173728 | 0,508338814 |
| ROGDI    | 0,136343974  | 5,194820489 | 0,453848752 | 0,509012276 |
| GPX1     | -0,135230966 | 8,317020947 | 0,454547047 | 0,509711613 |
| AKAP1    | 0,113347709  | 6,623123654 | 0,455095383 | 0,510242588 |
| PPP2R2D  | 0,085760166  | 5,207547017 | 0,455758378 | 0,51090192  |
| BRD2     | -0,077495489 | 8,420591754 | 0,45669564  | 0,511868436 |
| COL18A1  | 0,2047995    | 7,95857837  | 0,45725488  | 0,512411015 |
| WDFY1    | -0,092203911 | 6,492810183 | 0,457646123 | 0,512765185 |
| STAT2    | 0,116250193  | 7,51158052  | 0,458026775 | 0,513107372 |
| ISG15    | 0,285339225  | 6,445484381 | 0,459755145 | 0,51495899  |
| CIZ1     | 0,094614814  | 6,915875743 | 0,459880138 | 0,515014397 |
| XAB2     | 0,104715293  | 6,142186877 | 0,460729216 | 0,515880546 |
| CD2BP2   | 0,075719163  | 6,638090037 | 0,461481175 | 0,516637684 |
| CYB5R4   | 0,127864067  | 5,315167445 | 0,463044904 | 0,518303217 |
| ANAPC4   | -0,073488416 | 4,810434072 | 0,464072868 | 0,519368602 |
| ZNF776   | -0,104874809 | 4,443645562 | 0,464753046 | 0,519987929 |
| FOXC1    | 0,255464652  | 4,571459935 | 0,46480185  | 0,519987929 |

|              |              |             |             |             |
|--------------|--------------|-------------|-------------|-------------|
| USP15        | 0,088319787  | 6,265582499 | 0,464855025 | 0,519987929 |
| WDR26        | -0,062518395 | 7,537786957 | 0,465469096 | 0,520589432 |
| LOC100170939 | 0,142128341  | 2,032588049 | 0,466204494 | 0,52132641  |
| CCDC106      | 0,156247064  | 3,887935512 | 0,467836793 | 0,523065928 |
| C10orf47     | 0,180572452  | 4,482043739 | 0,468080932 | 0,523176413 |
| TLE1         | 0,145129854  | 5,489308874 | 0,468195107 | 0,523176413 |
| DHX8         | 0,090331188  | 6,434594996 | 0,468207678 | 0,523176413 |
| LOC282997    | -0,111876236 | 1,987831434 | 0,468242506 | 0,523176413 |
| RSAD1        | -0,089609832 | 5,149678294 | 0,468756735 | 0,523665166 |
| COMMD10      | 0,167448117  | 5,006694445 | 0,469117526 | 0,523982377 |
| WDR20        | 0,085851414  | 4,753498483 | 0,469411137 | 0,524224459 |
| CRLF3        | 0,09679622   | 5,281590097 | 0,469823661 | 0,524599237 |
| UNC119B      | -0,097788238 | 6,217393473 | 0,47194376  | 0,526880239 |
| NUDT4        | 0,114700461  | 7,249572259 | 0,473669344 | 0,528720127 |
| RPL21        | -0,126429238 | 9,945879799 | 0,474356708 | 0,529400718 |
| GOSR2        | 0,070047663  | 6,24832544  | 0,476188457 | 0,531358057 |
| C22orf32     | -0,113423265 | 5,620428032 | 0,476885512 | 0,532048807 |
| RSC1A1       | 0,105399404  | 3,838611514 | 0,477032914 | 0,532126197 |
| EIF2C1       | -0,105412973 | 6,013912099 | 0,478512547 | 0,53368941  |
| H3F3B        | -0,084419736 | 9,877249486 | 0,479112606 | 0,534271277 |
| NSMCE1       | 0,08505683   | 5,800335617 | 0,479252094 | 0,534339443 |
| THADA        | 0,063817354  | 6,092805653 | 0,47936147  | 0,534374017 |
| RB1          | -0,115992363 | 6,507006241 | 0,480109765 | 0,535120707 |
| PCBD1        | 0,137210798  | 6,219284146 | 0,480326322 | 0,535274586 |
| CAMK1D       | -0,122912992 | 4,017882783 | 0,480472546 | 0,535350048 |
| ZDHHC20      | -0,102286034 | 4,676192456 | 0,482183198 | 0,537168311 |
| EID3         | -0,182408106 | 1,701539596 | 0,482434531 | 0,537360514 |
| L3MBTL4      | -0,199281617 | 3,629276127 | 0,482966944 | 0,537865685 |
| DCLRE1B      | 0,092051411  | 4,346249014 | 0,483841138 | 0,538721745 |
| FUT4         | -0,125926527 | 3,9627556   | 0,483893633 | 0,538721745 |
| TTL5         | 0,09199584   | 5,303555655 | 0,484705199 | 0,539537177 |
| PIK3C3       | 0,096272936  | 5,444052628 | 0,484819741 | 0,539576598 |
| NXF1         | -0,065371981 | 6,449232098 | 0,486359451 | 0,541201877 |
| CCNL1        | -0,118223447 | 6,633554426 | 0,48654415  | 0,541319067 |
| DYNC1I2      | -0,061399373 | 7,322678802 | 0,486692039 | 0,541395271 |
| CCRN4L       | -0,125551903 | 3,994491007 | 0,487448779 | 0,542148626 |
| TRAPPC9      | -0,102815227 | 5,68398735  | 0,488047593 | 0,542726115 |
| PRR12        | 0,125613175  | 5,987431464 | 0,489872725 | 0,544666902 |
| TPM1         | -0,132573895 | 7,762430362 | 0,490375377 | 0,545136893 |
| PPA1         | 0,113060994  | 7,902893203 | 0,490871324 | 0,545599276 |
| TMCO3        | -0,090948002 | 6,114719589 | 0,490994808 | 0,545647587 |
| TXLNA        | -0,077617351 | 6,976351016 | 0,491923778 | 0,546590882 |
| ZNF503       | 0,146632986  | 4,965369242 | 0,493481067 | 0,548231899 |
| ACTN1        | 0,154065994  | 8,548744391 | 0,493831404 | 0,548531739 |
| UBE2L6       | -0,136889741 | 7,389452665 | 0,49431088  | 0,548974901 |
| PPDPF        | 0,135773742  | 7,847405851 | 0,494411835 | 0,548997607 |
| PLBD2        | -0,102665514 | 6,023439918 | 0,495505597 | 0,550122545 |
| TET2         | -0,099301286 | 5,487180437 | 0,496753584 | 0,551418312 |
| NT5E         | 0,320780838  | 5,355852485 | 0,497015079 | 0,551618786 |
| CD7          | 0,229944434  | 3,757763983 | 0,497944174 | 0,55256002  |

|          |              |             |             |             |
|----------|--------------|-------------|-------------|-------------|
| NEO1     | -0,143104588 | 6,882262571 | 0,498444673 | 0,553025419 |
| KDM2A    | -0,089384716 | 7,597480108 | 0,499849119 | 0,554430253 |
| KIAA0528 | 0,124351452  | 5,769220921 | 0,499873471 | 0,554430253 |
| PLSCR3   | 0,098100218  | 5,653996687 | 0,501126197 | 0,555729311 |
| KIAA0196 | 0,074168669  | 6,453411559 | 0,50190261  | 0,556499821 |
| ARPC4    | -0,0784195   | 7,842814328 | 0,503374564 | 0,558041156 |
| SMEK1    | -0,070105194 | 6,667510808 | 0,504528516 | 0,559229511 |
| DNAJC4   | 0,087378144  | 5,032670003 | 0,505042635 | 0,55970839  |
| SAP18    | -0,086167799 | 7,167323838 | 0,506965224 | 0,561747784 |
| TAGLN2   | -0,105950738 | 10,43695004 | 0,508349165 | 0,563189757 |
| ZNF320   | 0,172760536  | 4,789677932 | 0,508712156 | 0,563500356 |
| ZNF585A  | 0,150907469  | 3,179529286 | 0,508807883 | 0,563514854 |
| LYRM2    | 0,08346551   | 6,100802021 | 0,509902723 | 0,564635704 |
| TMEM181  | 0,084108883  | 6,382328854 | 0,510339997 | 0,565004084 |
| SRCAP    | -0,079402306 | 7,848050768 | 0,510401108 | 0,565004084 |
| B3GALNT1 | -0,159203965 | 5,231385167 | 0,510609641 | 0,565143181 |
| TMEM179B | 0,086930133  | 6,404282599 | 0,51139773  | 0,565923584 |
| C21orf59 | 0,083842301  | 5,435987245 | 0,511486586 | 0,565930072 |
| UHMK1    | 0,130971647  | 5,203902973 | 0,511879912 | 0,566273381 |
| ZNF431   | 0,117557129  | 3,781796294 | 0,512975335 | 0,567393156 |
| ECH1     | 0,125173499  | 7,598139262 | 0,513214318 | 0,567565429 |
| ASPN     | 0,271067873  | 5,472937958 | 0,513671708 | 0,567979143 |
| USP6NL   | -0,077935631 | 5,372438889 | 0,513923048 | 0,568164926 |
| ZFP161   | 0,065121519  | 4,559241847 | 0,514991831 | 0,569254222 |
| TERF2    | -0,062465175 | 5,280511865 | 0,515812203 | 0,570068624 |
| MCPH1    | -0,07452072  | 4,828568587 | 0,517003289 | 0,571292405 |
| TYW3     | -0,078599868 | 4,952480084 | 0,517266975 | 0,571401356 |
| VPS37C   | -0,068087434 | 5,628353078 | 0,517269478 | 0,571401356 |
| S100A13  | -0,127242233 | 6,394981615 | 0,518108752 | 0,572235759 |
| MRPL54   | 0,143644302  | 5,275177404 | 0,519213415 | 0,57336296  |
| CENPB    | 0,094151725  | 7,210910683 | 0,520365261 | 0,574519297 |
| RAB35    | -0,056468541 | 6,302855893 | 0,52042905  | 0,574519297 |
| DDX6     | -0,062366924 | 7,767227907 | 0,521813877 | 0,575954812 |
| PPARD    | -0,092689576 | 6,379931027 | 0,523158208 | 0,577345173 |
| ZNF224   | -0,101951263 | 2,976403476 | 0,523388732 | 0,57750611  |
| CLTC     | -0,062416267 | 9,415566325 | 0,52386416  | 0,57793718  |
| UBXN1    | -0,057884473 | 6,723264354 | 0,524668388 | 0,578730789 |
| MYO10    | -0,130032936 | 7,389649032 | 0,524826625 | 0,578811702 |
| TUBGCP6  | -0,094561846 | 5,472517448 | 0,525172692 | 0,579099707 |
| SLC35A5  | -0,085438732 | 5,735263999 | 0,525270694 | 0,579114125 |
| NEAT1    | -0,154837617 | 8,548002365 | 0,525707118 | 0,579437097 |
| BTG1     | 0,110644413  | 8,476904652 | 0,525733586 | 0,579437097 |
| FUT10    | 0,120589741  | 3,439895139 | 0,52591959  | 0,579471189 |
| BCR      | 0,108437539  | 7,310004957 | 0,525934476 | 0,579471189 |
| C9orf91  | -0,079546378 | 5,15888972  | 0,526352747 | 0,57983835  |
| RNF144A  | -0,115466789 | 5,208861671 | 0,528351471 | 0,58194616  |
| ZNF397   | -0,097491187 | 4,151570955 | 0,530174933 | 0,583860282 |
| ZNF17    | -0,086056043 | 3,002053735 | 0,530453469 | 0,584072696 |
| DZIP1    | 0,122849277  | 4,590688046 | 0,531008644 | 0,584589593 |
| CTSC     | -0,12008981  | 9,108388127 | 0,532207063 | 0,58581436  |

|           |              |             |             |             |
|-----------|--------------|-------------|-------------|-------------|
| RAI1      | 0,122436022  | 5,973661183 | 0,532578568 | 0,586121704 |
| EEF1A1    | -0,091994425 | 14,21294869 | 0,532658191 | 0,586121704 |
| RAB3IP    | 0,112768718  | 5,531919861 | 0,532837292 | 0,586224184 |
| PRDX5     | 0,115207879  | 8,286857816 | 0,533000938 | 0,58630963  |
| ADIPOR1   | 0,064594244  | 8,048391095 | 0,53416031  | 0,587490186 |
| TBC1D22A  | 0,077093404  | 5,585420248 | 0,536701387 | 0,59018977  |
| TMEM126B  | 0,115320548  | 5,353555425 | 0,537051685 | 0,590479755 |
| TPST2     | -0,088541602 | 5,904533332 | 0,537166063 | 0,590510299 |
| GTF3C1    | 0,13979159   | 7,281748703 | 0,537461778 | 0,590740145 |
| AP1B1     | 0,079526167  | 7,883920511 | 0,537609726 | 0,59080753  |
| SLC30A7   | -0,063560059 | 5,904108961 | 0,538364148 | 0,591541271 |
| SERPINF1  | 0,185713935  | 7,833831431 | 0,539553785 | 0,592752902 |
| PSMB10    | -0,118608754 | 6,303781373 | 0,5411142   | 0,594371412 |
| INPP1     | -0,149883691 | 5,197312531 | 0,542468474 | 0,595763009 |
| MYSM1     | 0,099667096  | 2,750856707 | 0,543680134 | 0,596997558 |
| ARFRP1    | -0,081503162 | 5,312672565 | 0,545932713 | 0,599374524 |
| GPATCH8   | -0,06859066  | 6,260162716 | 0,546785735 | 0,600193635 |
| TMUB2     | 0,05917288   | 5,781757207 | 0,546854825 | 0,600193635 |
| SH2B1     | -0,081060903 | 5,483001733 | 0,548836137 | 0,602271262 |
| ATP11C    | 0,127198155  | 5,117233203 | 0,548992435 | 0,602345843 |
| AGR2      | 0,303777088  | 7,312975731 | 0,549737269 | 0,60306603  |
| ECE1      | -0,111614849 | 8,401635224 | 0,550568784 | 0,603826462 |
| SEMA4A    | 0,109669111  | 6,453697332 | 0,550607559 | 0,603826462 |
| SART1     | 0,078955138  | 6,652344995 | 0,550787362 | 0,603926519 |
| EIF4ENIF1 | 0,063380517  | 5,386677427 | 0,551138742 | 0,604214643 |
| RASSF4    | -0,135909571 | 5,604368839 | 0,551742668 | 0,604779497 |
| CETN2     | 0,093499227  | 6,483885032 | 0,551858823 | 0,604809598 |
| IKBKB     | 0,163679397  | 6,264560862 | 0,552284782 | 0,605179163 |
| ARL3      | 0,10634835   | 5,341226068 | 0,552881442 | 0,605735629 |
| PIGG      | 0,098656108  | 5,390739177 | 0,553694308 | 0,606488138 |
| IRAK1BP1  | 0,135852489  | 2,051097951 | 0,553746172 | 0,606488138 |
| STXBP5    | -0,091479488 | 4,746985658 | 0,554867654 | 0,607618842 |
| JOSD1     | 0,080480915  | 7,382625767 | 0,556335716 | 0,609128653 |
| SSBP2     | 0,142758694  | 4,909758278 | 0,55675351  | 0,60948823  |
| CPD       | 0,128868307  | 8,018383782 | 0,557011761 | 0,609673065 |
| ZMYM4     | 0,065414097  | 6,406048282 | 0,56052244  | 0,613417191 |
| PRKD2     | -0,073429565 | 6,434399187 | 0,560857134 | 0,613613202 |
| TMEM176B  | -0,133874477 | 6,906957443 | 0,560881521 | 0,613613202 |
| IRF9      | -0,099295201 | 5,814642855 | 0,561336849 | 0,614012828 |
| ATF2      | 0,071384324  | 5,138159543 | 0,561861598 | 0,614488249 |
| B3GNT2    | -0,09967594  | 6,304025261 | 0,562814881 | 0,615432116 |
| SPSB1     | 0,11401547   | 6,366560104 | 0,563192954 | 0,615746794 |
| GGA1      | -0,066142017 | 6,115020453 | 0,563399642 | 0,615811598 |
| FAM120C   | -0,092968667 | 4,005912128 | 0,563432844 | 0,615811598 |
| DNAJB9    | -0,106860859 | 6,364704995 | 0,564690161 | 0,617086893 |
| MED23     | -0,060490038 | 5,34145095  | 0,565058572 | 0,617390547 |
| TMEM97    | 0,128960013  | 6,158367482 | 0,565919297 | 0,618231926 |
| ALKBH5    | -0,067634303 | 7,166562519 | 0,566592025 | 0,618867695 |
| RPL15     | 0,099180065  | 10,44516047 | 0,566928606 | 0,619136157 |
| ANAPC10   | 0,071216113  | 3,707364692 | 0,567648541 | 0,619823122 |



|         |              |             |             |             |
|---------|--------------|-------------|-------------|-------------|
| TAB1    | 0,064362544  | 5,510252022 | 0,568178102 | 0,620208639 |
| STARD3  | 0,113131747  | 6,082723992 | 0,568183512 | 0,620208639 |
| MGST2   | 0,109560003  | 5,616657584 | 0,568567992 | 0,620528991 |
| MAN1A2  | 0,090368009  | 5,641213132 | 0,56872696  | 0,620603159 |
| POLI    | -0,0811649   | 4,509490588 | 0,569268078 | 0,621094244 |
| WDR11   | -0,066747069 | 6,226645885 | 0,569589077 | 0,621345051 |
| BTBD1   | 0,055466991  | 6,652859837 | 0,570234245 | 0,621949346 |
| CDKN1B  | 0,095058269  | 6,478309142 | 0,571867527 | 0,623631004 |
| LRIG2   | 0,077210761  | 3,743003276 | 0,572780561 | 0,624526806 |
| CLIP4   | -0,112697079 | 6,076154815 | 0,573119794 | 0,624796783 |
| ENC1    | 0,153597032  | 6,200608867 | 0,574103881 | 0,62576956  |
| TNRC18  | -0,085053843 | 7,416610482 | 0,574356589 | 0,625944955 |
| CCDC8   | 0,247270923  | 4,529477874 | 0,574848319 | 0,626380742 |
| CHMP4B  | 0,069661478  | 7,841501991 | 0,575631356 | 0,627133763 |
| EBAG9   | -0,06840157  | 5,315562316 | 0,576081499 | 0,62752392  |
| ALG14   | 0,106751882  | 3,721006814 | 0,576208797 | 0,627562337 |
| AGPS    | -0,071630443 | 6,461759052 | 0,576761579 | 0,62806407  |
| GRB10   | 0,150196931  | 6,22264905  | 0,577327832 | 0,628580311 |
| ATP5S   | 0,093976133  | 3,297804147 | 0,577871302 | 0,629071585 |
| EXTL3   | 0,103387632  | 6,431027312 | 0,578384552 | 0,62952981  |
| R3HDM2  | -0,070808894 | 6,483351234 | 0,579659798 | 0,630817134 |
| FOXN2   | 0,090622607  | 5,540322273 | 0,579810929 | 0,63088092  |
| AMD1    | -0,072524055 | 7,375099584 | 0,58191275  | 0,633066854 |
| LRRCC1  | 0,127248043  | 4,787422953 | 0,583223931 | 0,634311074 |
| RNF4    | 0,063704735  | 6,585496727 | 0,583242474 | 0,634311074 |
| FAM120A | 0,069119817  | 8,213162914 | 0,583573488 | 0,634569863 |
| HYMAI   | 0,0943781    | 0,317002206 | 0,583973979 | 0,634904108 |
| EDF1    | 0,06351      | 7,658877039 | 0,584430204 | 0,63529883  |
| GALK2   | -0,058361766 | 4,752260575 | 0,584935635 | 0,635746908 |
| PDDC1   | -0,073682491 | 5,83708891  | 0,585808218 | 0,636593823 |
| ZDHHC2  | -0,125793837 | 6,137980948 | 0,586643141 | 0,63739955  |
| RBM27   | -0,052594427 | 5,795145644 | 0,587166382 | 0,637866427 |
| TESK1   | 0,105222743  | 5,792224018 | 0,587644202 | 0,638283819 |
| TEAD4   | 0,115171842  | 4,815175858 | 0,588139411 | 0,638719962 |
| PKN2    | 0,064128257  | 6,372752859 | 0,588266193 | 0,638755919 |
| RABGEF1 | 0,070988542  | 6,012578652 | 0,588522135 | 0,638932087 |
| TRAFD1  | 0,081519371  | 6,422825026 | 0,589993546 | 0,640427569 |
| CLTB    | 0,107743043  | 6,570913944 | 0,590745289 | 0,641141513 |
| ARFGAP3 | 0,073664492  | 6,583652989 | 0,592601545 | 0,643053777 |
| GNB2    | 0,070511384  | 8,277720738 | 0,593098688 | 0,643490843 |
| SSBP3   | 0,123593131  | 5,625037771 | 0,593898229 | 0,644255811 |
| GNL1    | 0,06225225   | 6,526388076 | 0,594620935 | 0,644937197 |
| RNF167  | -0,056216558 | 7,027703528 | 0,594928912 | 0,645168615 |
| KRT18   | -0,111685368 | 9,08537134  | 0,597265597 | 0,647526144 |
| CRTC2   | 0,05707954   | 6,168070578 | 0,597292777 | 0,647526144 |
| PYGB    | 0,11930959   | 7,962369761 | 0,598946384 | 0,649215609 |
| LARP4   | 0,054940325  | 6,437630722 | 0,600879623 | 0,651207589 |
| RANBP3  | -0,057812989 | 6,275070644 | 0,601521421 | 0,651799551 |
| SAFB    | 0,073935752  | 6,993401835 | 0,601931527 | 0,652140305 |
| ZNF277  | 0,076674581  | 5,243560341 | 0,603658069 | 0,653906969 |

|          |              |             |             |             |
|----------|--------------|-------------|-------------|-------------|
| CCDC104  | -0,07373694  | 5,550951964 | 0,604125619 | 0,654309497 |
| RPL3     | 0,073078474  | 11,46768419 | 0,605805798 | 0,65602505  |
| ZNF688   | 0,086308973  | 3,562455436 | 0,60655908  | 0,656736483 |
| MYL12B   | -0,076236694 | 9,44824087  | 0,607741458 | 0,657912209 |
| DCTD     | -0,057614449 | 6,607493973 | 0,608856924 | 0,659015138 |
| SH3PXD2B | 0,114515708  | 6,645178458 | 0,609114834 | 0,659189661 |
| RELT     | -0,077213828 | 4,317781487 | 0,609745589 | 0,659767561 |
| ZNF180   | 0,077312686  | 3,504758463 | 0,611201853 | 0,661238368 |
| ACIN1    | -0,055929544 | 7,238090605 | 0,611809551 | 0,66179082  |
| SMAD2    | 0,073360005  | 7,198058253 | 0,612305523 | 0,662222262 |
| LENG9    | -0,075507464 | 2,867984628 | 0,6124831   | 0,66230927  |
| SREBF2   | -0,076502531 | 8,4666519   | 0,61261793  | 0,662350034 |
| TSG101   | 0,068030633  | 6,612625594 | 0,612744301 | 0,662381641 |
| VPS54    | 0,075116031  | 5,840497176 | 0,613605746 | 0,663207732 |
| MUT      | 0,066515082  | 5,789485716 | 0,614182402 | 0,6637258   |
| FAM109B  | 0,108991274  | 4,752103701 | 0,615355889 | 0,664888576 |
| ABCC3    | 0,202000514  | 6,100673664 | 0,615492591 | 0,664930922 |
| SQSTM1   | 0,102150537  | 9,354123823 | 0,616120974 | 0,665504344 |
| PTGR2    | 0,082904663  | 3,823026586 | 0,616773872 | 0,666104059 |
| PYCARD   | 0,116004883  | 5,365566935 | 0,617305545 | 0,666572686 |
| RAP1B    | 0,094026691  | 8,173740855 | 0,617698605 | 0,666891511 |
| C16orf72 | -0,051988894 | 6,307192578 | 0,618081778 | 0,667199564 |
| LMBRD2   | 0,099819767  | 3,711327428 | 0,61928874  | 0,668396632 |
| MSH3     | -0,04732474  | 4,696716263 | 0,62013846  | 0,669207812 |
| GPR137B  | 0,089355675  | 5,49077857  | 0,620572795 | 0,669570552 |
| CSTF2T   | -0,05597276  | 5,848208924 | 0,622008984 | 0,671013964 |
| SLFN13   | 0,149929118  | 4,888137994 | 0,622766854 | 0,671725273 |
| AP3M1    | 0,05413923   | 6,513634827 | 0,622932882 | 0,67179809  |
| KTN1     | -0,070369578 | 8,27709471  | 0,623257805 | 0,672042216 |
| NRIP1    | 0,127816116  | 6,652879594 | 0,623711524 | 0,672425119 |
| SPNS1    | -0,055016325 | 6,226391379 | 0,626276522 | 0,675083719 |
| HTRA1    | -0,107341889 | 7,144061627 | 0,62662972  | 0,675357683 |
| PELI2    | -0,107878459 | 4,887017453 | 0,626783491 | 0,67541666  |
| TPM4     | -0,069098672 | 9,958953438 | 0,627093954 | 0,675644442 |
| RRAS2    | 0,110543725  | 5,90837297  | 0,630210929 | 0,67889547  |
| RDH11    | -0,061234736 | 6,957732384 | 0,631087535 | 0,679732412 |
| MAP2K1   | 0,05673838   | 6,8207761   | 0,631781016 | 0,680371881 |
| RNF170   | 0,068497185  | 5,120796613 | 0,631959726 | 0,680456872 |
| RNF141   | -0,066342536 | 6,52588293  | 0,632606027 | 0,681045232 |
| DNAJC8   | 0,060172175  | 7,118575478 | 0,633702839 | 0,682118336 |
| DCAF10   | 0,064335454  | 5,929556175 | 0,634249283 | 0,682598779 |
| AQR      | -0,051395919 | 5,978362693 | 0,63505907  | 0,683362443 |
| HIGD1A   | -0,078793472 | 7,128590295 | 0,635558375 | 0,68379182  |
| PROSC    | 0,103484955  | 6,540635354 | 0,635852294 | 0,684000125 |
| KIAA1704 | 0,068362326  | 4,447717761 | 0,636408877 | 0,684490873 |
| PSME1    | -0,071228625 | 8,06283292  | 0,637948701 | 0,686006017 |
| FKBP2    | 0,072464578  | 5,985354098 | 0,638018794 | 0,686006017 |
| GATAD2B  | -0,056957091 | 6,13897643  | 0,63857205  | 0,686492639 |
| FLOT2    | -0,063013074 | 7,90685138  | 0,638840727 | 0,686673222 |
| HPS6     | -0,052035483 | 5,003761113 | 0,639582704 | 0,687362405 |

|           |              |             |             |             |
|-----------|--------------|-------------|-------------|-------------|
| CCDC85B   | -0,090285467 | 4,28279193  | 0,640055398 | 0,687762017 |
| ISG20     | -0,101490318 | 5,125729973 | 0,640256374 | 0,687869578 |
| PLD3      | -0,086305843 | 9,198120161 | 0,641047739 | 0,6886113   |
| IFI6      | -0,141567303 | 7,833543442 | 0,641191723 | 0,688657483 |
| GBE1      | -0,069317389 | 5,749247988 | 0,641672521 | 0,689009278 |
| CDK2AP2   | -0,076628865 | 6,24376925  | 0,64182861  | 0,689009278 |
| SEC22B    | -0,055642874 | 6,584551692 | 0,641896369 | 0,689009278 |
| ETNK1     | 0,086602257  | 6,504313797 | 0,641923441 | 0,689009278 |
| MGAT4B    | 0,066374877  | 7,078480616 | 0,642341252 | 0,689349228 |
| TMEM67    | -0,06615832  | 4,023387274 | 0,642518983 | 0,689431462 |
| CTNBL1    | -0,049832227 | 6,124574421 | 0,642737679 | 0,68955762  |
| ADAR      | -0,055907616 | 9,090131613 | 0,643642695 | 0,690419936 |
| LOC93622  | 0,07883483   | 4,070363543 | 0,644908954 | 0,691669417 |
| GPKOW     | -0,041481875 | 5,023346459 | 0,645269877 | 0,691947679 |
| PTPN14    | 0,097239246  | 4,469579275 | 0,647030793 | 0,693726883 |
| ZFAND2B   | -0,068086154 | 4,762917841 | 0,647736733 | 0,694293585 |
| RPL26     | -0,068768319 | 9,537501234 | 0,647790641 | 0,694293585 |
| CEP68     | -0,062399794 | 5,660221065 | 0,647864802 | 0,694293585 |
| PRPF4B    | -0,04353953  | 6,570164019 | 0,648035789 | 0,6943677   |
| ADAT1     | 0,066482022  | 4,349214818 | 0,648620609 | 0,694885143 |
| RNPEP     | -0,048911262 | 6,954473364 | 0,648763498 | 0,694929044 |
| ATP6V1D   | -0,055581976 | 6,243378178 | 0,648877451 | 0,694941941 |
| PHF16     | 0,071586484  | 4,475899872 | 0,650088774 | 0,696129923 |
| FDFT1     | 0,093609376  | 8,021106168 | 0,651270358 | 0,697216813 |
| PAF1      | 0,085286456  | 6,68808591  | 0,65130827  | 0,697216813 |
| KCTD6     | -0,063920778 | 2,914611391 | 0,652332228 | 0,698203338 |
| FAM195B   | 0,10743983   | 6,344622851 | 0,652754451 | 0,698545606 |
| RBBP9     | 0,067752043  | 5,723629562 | 0,653337659 | 0,699060018 |
| ZNF805    | -0,051830969 | 4,593671703 | 0,653774696 | 0,699417894 |
| FUNDC2    | 0,088530618  | 6,836979558 | 0,654273679 | 0,699841917 |
| ACTR2     | 0,05302344   | 9,026566489 | 0,654515768 | 0,699991063 |
| DIS3      | 0,055667401  | 6,268479348 | 0,654951342 | 0,70034706  |
| PLEKHM1P  | 0,075451425  | 3,876421677 | 0,655156    | 0,700456062 |
| TRIP4     | -0,043467614 | 5,187871253 | 0,656873168 | 0,702181868 |
| DHODH     | 0,053597071  | 3,859649559 | 0,657175319 | 0,702394749 |
| HTATSF1   | 0,062509162  | 6,635515283 | 0,658261429 | 0,703445335 |
| NCKIPSD   | -0,050698687 | 4,905771049 | 0,658508857 | 0,703490427 |
| RAB32     | -0,08072823  | 5,555493541 | 0,658509957 | 0,703490427 |
| KLHDC2    | -0,058762177 | 5,843545988 | 0,659171664 | 0,704083381 |
| MARVELD1  | -0,071990377 | 6,39371659  | 0,659271504 | 0,704083381 |
| C11orf75  | -0,072681322 | 4,594351738 | 0,659947565 | 0,704695027 |
| SLC25A16  | -0,062069964 | 4,119709989 | 0,66060108  | 0,705267168 |
| VCAM1     | -0,130216703 | 6,082005644 | 0,660690229 | 0,705267168 |
| VTI1B     | -0,051078328 | 6,21778986  | 0,661206203 | 0,705681691 |
| MED9      | 0,054935135  | 4,462965936 | 0,661287839 | 0,705681691 |
| FGFR1OP2  | -0,050945508 | 5,459968406 | 0,661389014 | 0,705681691 |
| CHMP2A    | 0,059119041  | 6,980155484 | 0,661527207 | 0,705712798 |
| ARF4      | -0,060322601 | 8,205599796 | 0,661625153 | 0,705712798 |
| NIPSNAP3A | -0,076188647 | 5,283785049 | 0,66223813  | 0,706256148 |
| BMI1      | 0,063425992  | 6,489098055 | 0,662643017 | 0,706577441 |

|         |              |             |             |             |
|---------|--------------|-------------|-------------|-------------|
| EFNA1   | 0,108575967  | 7,482440267 | 0,663128095 | 0,706984128 |
| EIF3C   | 0,068345293  | 7,575057177 | 0,663495342 | 0,707265083 |
| DOLK    | 0,06225411   | 4,993414137 | 0,664401562 | 0,708120389 |
| FAM50A  | 0,061664814  | 6,39525796  | 0,664591111 | 0,708211718 |
| UCK1    | -0,044663833 | 5,313082561 | 0,666366155 | 0,709992314 |
| PARN    | 0,04518372   | 6,301738875 | 0,666477892 | 0,709995886 |
| NHLRC2  | 0,064426912  | 3,601229319 | 0,666577748 | 0,709995886 |
| PPIG    | 0,047862231  | 6,243554014 | 0,667159983 | 0,710505064 |
| TOMM7   | -0,062918177 | 7,448364211 | 0,669355664 | 0,712732085 |
| IRF2BP2 | -0,042356965 | 8,095908189 | 0,670285069 | 0,713610287 |
| NSUN4   | 0,045614707  | 5,305848533 | 0,670786525 | 0,714032675 |
| ACAD11  | 0,08514548   | 4,506218939 | 0,673122964 | 0,716387947 |
| OGG1    | -0,05308046  | 4,123001256 | 0,673209263 | 0,716387947 |
| GNG12   | -0,070034784 | 7,602409154 | 0,673405812 | 0,716485291 |
| SLC39A1 | -0,045911073 | 7,734465059 | 0,674400241 | 0,71741225  |
| NF2     | 0,055795573  | 6,335865388 | 0,674487452 | 0,71741225  |
| IFT122  | -0,063119228 | 5,444060595 | 0,675017567 | 0,717864128 |
| PLEKHA3 | -0,046479718 | 4,811988554 | 0,676727767 | 0,71957066  |
| BAP1    | 0,054119857  | 6,843970881 | 0,678462347 | 0,721302579 |
| SF3B2   | 0,042160127  | 8,3290835   | 0,679936919 | 0,722757576 |
| PACS1   | -0,053672267 | 7,221656963 | 0,680063784 | 0,72277976  |
| INPP4B  | -0,10275899  | 3,672543321 | 0,681024688 | 0,723688227 |
| DYNLRB1 | 0,05247717   | 7,019354029 | 0,681257106 | 0,723702822 |
| RNPC3   | -0,050390104 | 2,836203433 | 0,681322359 | 0,723702822 |
| LENG8   | 0,091568437  | 6,793408432 | 0,681356814 | 0,723702822 |
| SNX4    | 0,055119007  | 6,014385091 | 0,681743816 | 0,724001103 |
| PLEKHA1 | 0,076924188  | 6,887750017 | 0,682221287 | 0,724395353 |
| CHST15  | -0,074848466 | 6,243219229 | 0,682611613 | 0,724696963 |
| DRAM2   | -0,051687504 | 6,092265012 | 0,683198085 | 0,725206685 |
| ZMYM5   | -0,043130413 | 4,190001279 | 0,683451357 | 0,725362615 |
| SIN3B   | 0,057779448  | 5,894320705 | 0,683867108 | 0,725690914 |
| SHB     | -0,072022296 | 5,685222625 | 0,684185712 | 0,725916037 |
| PURB    | 0,05239915   | 6,987839842 | 0,684418122 | 0,726049653 |
| MEAF6   | -0,050513571 | 6,384419501 | 0,685002329 | 0,726556366 |
| UAP1    | 0,06564377   | 6,524397715 | 0,68525747  | 0,726713949 |
| ANXA2   | 0,08162484   | 11,09047533 | 0,686488416 | 0,727906159 |
| ZNF780A | -0,059400744 | 4,086717416 | 0,686686839 | 0,728003351 |
| H2AFV   | 0,04693424   | 8,029533893 | 0,689001739 | 0,730343985 |
| TRPC4AP | -0,037644896 | 7,268393044 | 0,689137274 | 0,730374117 |
| PITPNM1 | 0,079974085  | 5,839058693 | 0,689263481 | 0,730394355 |
| SP140L  | 0,078247686  | 4,834558158 | 0,691466525 | 0,732615015 |
| TAF1C   | 0,063988292  | 5,338949263 | 0,693416426 | 0,734518863 |
| SKAP1   | 0,146139653  | 3,745593391 | 0,693478874 | 0,734518863 |
| HMOX2   | 0,05758803   | 6,13239334  | 0,696853842 | 0,737978933 |
| URM1    | 0,050699877  | 6,135338695 | 0,698425879 | 0,739528893 |
| LUM     | -0,106766467 | 10,09458359 | 0,699357907 | 0,740400802 |
| SRPR    | -0,041278446 | 8,173197587 | 0,699618444 | 0,740561654 |
| ADRBK1  | 0,048856695  | 7,357639705 | 0,700200711 | 0,74106296  |
| HACE1   | 0,091662633  | 4,309270607 | 0,700487387 | 0,741251318 |
| PEG10   | -0,139401555 | 7,100801115 | 0,700934063 | 0,741608903 |

|          |              |             |             |             |
|----------|--------------|-------------|-------------|-------------|
| EDC4     | -0,043348661 | 6,286665335 | 0,70148654  | 0,742078299 |
| PIBF1    | -0,045631413 | 4,633551392 | 0,702435223 | 0,742966618 |
| ANXA2P2  | 0,077527522  | 6,780226043 | 0,703062472 | 0,743514733 |
| IRF5     | 0,094513502  | 5,029322408 | 0,704508603 | 0,744928542 |
| SCARB1   | 0,077690616  | 6,118557092 | 0,706764029 | 0,747197506 |
| YIPF3    | -0,035759816 | 7,358052684 | 0,709460291 | 0,749931751 |
| TAF13    | 0,062527588  | 4,131490795 | 0,711784992 | 0,752272452 |
| PCOLCE   | -0,088140059 | 6,608526585 | 0,712398226 | 0,752678004 |
| CHMP1B   | 0,056188637  | 7,323254941 | 0,712498747 | 0,752678004 |
| PRPF38A  | 0,045211864  | 5,900737475 | 0,712595983 | 0,752678004 |
| AGAP1    | 0,071560129  | 4,999315539 | 0,712618677 | 0,752678004 |
| TAF15    | -0,055844252 | 7,274361428 | 0,712720615 | 0,752678004 |
| RFX5     | -0,051188865 | 6,220576604 | 0,713593716 | 0,753452373 |
| ACSL3    | 0,053650445  | 7,136254127 | 0,713780827 | 0,753452373 |
| EIF4G2   | 0,044544101  | 10,70522719 | 0,713785354 | 0,753452373 |
| TP53BP1  | 0,051116621  | 6,038685176 | 0,714783546 | 0,754389258 |
| CLOCK    | -0,066835781 | 4,605634553 | 0,71714153  | 0,75676077  |
| SFMBT1   | -0,047824118 | 4,045077725 | 0,720494173 | 0,760180994 |
| UPF3A    | -0,043992713 | 5,271285053 | 0,721003679 | 0,76060088  |
| RPP14    | -0,02602411  | 4,915670613 | 0,721557838 | 0,761067734 |
| SPSB2    | 0,071329952  | 3,850825851 | 0,721755684 | 0,761158677 |
| RNF40    | -0,042085688 | 7,116798681 | 0,722543726 | 0,761871914 |
| C18orf8  | -0,044507189 | 5,371749318 | 0,724783565 | 0,764115512 |
| ADIPOR2  | -0,044134934 | 7,495373583 | 0,724911278 | 0,764132015 |
| LGALS1   | 0,112393065  | 8,56979316  | 0,726461551 | 0,765647808 |
| SUMF2    | 0,073607896  | 8,031231428 | 0,726961501 | 0,766056324 |
| ZNF187   | 0,053277751  | 4,149813054 | 0,727469576 | 0,766473275 |
| C11orf58 | 0,047304378  | 7,904588759 | 0,727625083 | 0,766518684 |
| GGCX     | -0,037504166 | 5,997479403 | 0,728110852 | 0,76691194  |
| IMPAD1   | 0,051985509  | 7,505560286 | 0,72849527  | 0,76719834  |
| VPS4A    | -0,031137948 | 7,013241171 | 0,729112359 | 0,767528511 |
| HSD3B7   | -0,059474172 | 5,168700302 | 0,729171757 | 0,767528511 |
| CCNJ     | 0,060952583  | 3,784109963 | 0,729207844 | 0,767528511 |
| TTC21B   | -0,041398699 | 4,795309976 | 0,729332895 | 0,767528511 |
| ZNF595   | 0,102592723  | 3,729017927 | 0,729371572 | 0,767528511 |
| FASTKD5  | 0,052873271  | 5,034373996 | 0,73001423  | 0,768086257 |
| PDCD4    | -0,045777502 | 6,761053155 | 0,730167573 | 0,768129077 |
| DOPEY2   | -0,054118043 | 5,418902397 | 0,731751219 | 0,769676317 |
| NGLY1    | -0,031757083 | 5,055614459 | 0,733380193 | 0,771270749 |
| TNFAIP8  | 0,059545503  | 5,322588934 | 0,733705218 | 0,771493583 |
| RIC8A    | 0,035200435  | 7,013490633 | 0,734329206 | 0,772030659 |
| RRAGC    | 0,049274978  | 5,176197377 | 0,734729581 | 0,772309344 |
| CCDC97   | 0,049284258  | 6,116492405 | 0,734820798 | 0,772309344 |
| POGK     | -0,040409017 | 6,851499493 | 0,735901196 | 0,773325668 |
| ATP6AP2  | 0,045344883  | 8,058006927 | 0,736129158 | 0,773446029 |
| TAF8     | -0,033385426 | 5,432095303 | 0,736579723 | 0,773800205 |
| MET      | 0,094388333  | 7,477903194 | 0,737903803 | 0,775071786 |
| WASF2    | -0,049898923 | 8,46043091  | 0,739381453 | 0,776504255 |
| ZNF823   | 0,058276044  | 2,679179631 | 0,739570661 | 0,77658336  |
| P4HA2    | -0,058156508 | 6,718721899 | 0,740149571 | 0,777071582 |

|          |              |             |             |             |
|----------|--------------|-------------|-------------|-------------|
| SMG1     | 0,049949112  | 7,007313265 | 0,742968082 | 0,779910614 |
| NPAT     | 0,040322746  | 5,074230803 | 0,743477501 | 0,78032524  |
| LETMD1   | -0,034514958 | 5,726306319 | 0,744179195 | 0,78094151  |
| FAM108A1 | -0,041644556 | 5,752659269 | 0,746371687 | 0,783121793 |
| ELOVL5   | -0,037927524 | 7,551576707 | 0,746688765 | 0,783333953 |
| PCMTD2   | 0,058110044  | 6,095527137 | 0,747317668 | 0,783873124 |
| VEGFA    | 0,071958782  | 7,903656772 | 0,74811145  | 0,784585048 |
| IFI27    | 0,155642114  | 8,494518909 | 0,749458074 | 0,785876458 |
| TRNT1    | 0,042918348  | 4,18368294  | 0,750114506 | 0,786443853 |
| RNF31    | -0,037742602 | 6,671512462 | 0,750313826 | 0,786531895 |
| ERP29    | -0,037795266 | 7,904349207 | 0,750689106 | 0,786804337 |
| SGSM3    | 0,04183379   | 6,116022015 | 0,752450125 | 0,788528877 |
| RAB12    | 0,042014967  | 6,265128894 | 0,752767873 | 0,788740646 |
| GLUD1    | 0,054933332  | 8,098414405 | 0,753633856 | 0,789526696 |
| CLIP3    | -0,071960432 | 4,673817215 | 0,754203267 | 0,790001855 |
| USP48    | 0,036048901  | 6,140918735 | 0,754521051 | 0,790213339 |
| GZF1     | -0,031523617 | 4,844454647 | 0,756344702 | 0,792001616 |
| SS18     | 0,055094863  | 6,884225432 | 0,756854305 | 0,792413559 |
| IREB2    | 0,037711112  | 6,469846905 | 0,7578696   | 0,793354744 |
| STAG1    | 0,047379687  | 5,804600075 | 0,758891298 | 0,794302342 |
| PPL      | -0,07388235  | 7,741076113 | 0,759623215 | 0,794946394 |
| CRAMP1L  | -0,039709754 | 5,506347038 | 0,759875085 | 0,79508407  |
| HIAT1    | -0,031189406 | 6,719495628 | 0,759987971 | 0,79508407  |
| ZNF641   | -0,040304348 | 3,727410679 | 0,760656203 | 0,79566109  |
| TAF7     | 0,047387956  | 7,374704806 | 0,761000038 | 0,795833538 |
| C5orf44  | 0,055310114  | 5,019239417 | 0,76105448  | 0,795833538 |
| RPS6KA5  | 0,067787666  | 3,93731606  | 0,761217891 | 0,795882367 |
| RSPRY1   | 0,040557287  | 4,857213686 | 0,761420079 | 0,795910522 |
| HIRA     | 0,047384121  | 5,905633185 | 0,761496324 | 0,795910522 |
| STAG2    | 0,037537912  | 7,405522996 | 0,761594978 | 0,795910522 |
| PDLIM5   | -0,037642715 | 7,099970645 | 0,763023037 | 0,797280737 |
| EXOC5    | -0,031668379 | 6,626746248 | 0,763518075 | 0,79767577  |
| RRAGB    | -0,045259541 | 4,293034246 | 0,766414046 | 0,800578642 |
| PPT1     | -0,049970677 | 8,666427643 | 0,767282494 | 0,801363046 |
| RALB     | 0,070134845  | 7,230806658 | 0,769742213 | 0,803808906 |
| SETD1B   | 0,048875486  | 5,752853495 | 0,770019983 | 0,803975848 |
| MED29    | -0,040957048 | 6,548304736 | 0,77262733  | 0,806574672 |
| UBA3     | -0,031673498 | 6,051986256 | 0,77301975  | 0,80686081  |
| USP34    | -0,041191534 | 7,416119752 | 0,774389999 | 0,808167341 |
| ARHGAP23 | -0,057042504 | 6,862179149 | 0,776355416 | 0,810094504 |
| NKAP     | 0,031249832  | 4,790707686 | 0,777972644 | 0,811657812 |
| DNASE2   | -0,035096671 | 6,978127343 | 0,778952935 | 0,812556228 |
| ADPGK    | 0,038408485  | 6,708438077 | 0,779744005 | 0,813257016 |
| NOL9     | 0,043914883  | 4,020935586 | 0,77986893  | 0,81326292  |
| VTIIA    | 0,025435748  | 4,84978241  | 0,7800799   | 0,813358538 |
| NBN      | 0,041370704  | 6,547908185 | 0,780214212 | 0,813374211 |
| NAPG     | 0,038062185  | 5,691552373 | 0,781271452 | 0,814351885 |
| CBX5     | 0,058013071  | 7,361730704 | 0,781413399 | 0,814375358 |
| ARFGEF2  | 0,039895658  | 6,557138524 | 0,781578083 | 0,814422516 |
| PSMD6    | 0,025750015  | 6,142124213 | 0,783127352 | 0,81591221  |

|           |              |             |             |             |
|-----------|--------------|-------------|-------------|-------------|
| C5orf42   | 0,055523143  | 4,78682303  | 0,783686502 | 0,816370036 |
| ATP6V1H   | -0,028737507 | 6,244323004 | 0,78481658  | 0,817422371 |
| PPP2R4    | 0,033693056  | 7,674453165 | 0,785519592 | 0,818029642 |
| RICTOR    | -0,031955919 | 5,886719746 | 0,786134827 | 0,818545333 |
| NUAK1     | -0,059339518 | 6,029813843 | 0,788702338 | 0,821093319 |
| FBRS      | 0,040662948  | 6,616346435 | 0,789667988 | 0,821973135 |
| ARRDC1    | 0,04212563   | 5,566044128 | 0,790660565 | 0,822880707 |
| ARPC5     | 0,043602123  | 8,514206642 | 0,792535745 | 0,824706432 |
| MIPEP     | 0,04205339   | 4,640194493 | 0,793224296 | 0,82529699  |
| ZBTB44    | -0,030992071 | 6,452098485 | 0,793706542 | 0,825672755 |
| HSDL1     | -0,033383241 | 5,181709064 | 0,795707072 | 0,827627596 |
| CD99      | 0,051384457  | 8,299230209 | 0,796262806 | 0,828051244 |
| OSGEP     | 0,042749287  | 4,880773014 | 0,796357246 | 0,828051244 |
| TYK2      | 0,051108974  | 6,307509963 | 0,798535547 | 0,83008925  |
| OLFML2B   | 0,087329615  | 5,633874746 | 0,798583414 | 0,83008925  |
| ANXA1     | 0,090169637  | 9,805111381 | 0,798682442 | 0,83008925  |
| COL6A1    | -0,05991329  | 8,912119268 | 0,799512352 | 0,830825165 |
| GOLGA1    | -0,025596746 | 5,009958669 | 0,800587953 | 0,831751893 |
| CAPRIN2   | -0,036823489 | 4,253259439 | 0,800769372 | 0,831751893 |
| LRRC37B   | 0,04453751   | 3,151868396 | 0,80077008  | 0,831751893 |
| UQCRB     | 0,038791571  | 7,515489753 | 0,802100139 | 0,833006526 |
| WDR33     | -0,019458234 | 6,465391165 | 0,803980594 | 0,834832293 |
| RPRD2     | -0,02909322  | 6,527572703 | 0,804751805 | 0,83550587  |
| ARGLU1    | -0,038227165 | 6,43571513  | 0,806374147 | 0,837062765 |
| SOCS7     | -0,039532658 | 2,469938482 | 0,806563665 | 0,83713206  |
| HNRNPH3   | -0,023849786 | 7,095383853 | 0,807816077 | 0,838304342 |
| KCTD17    | 0,047565185  | 4,302784132 | 0,808077835 | 0,838448381 |
| CNN2      | -0,033876995 | 8,452675086 | 0,808714129 | 0,838980929 |
| CARKD     | -0,029624744 | 5,689745104 | 0,809485976 | 0,83965392  |
| RNASET2   | -0,037220258 | 6,090580549 | 0,809669429 | 0,839716478 |
| SSBP4     | 0,043171969  | 5,184398676 | 0,81048549  | 0,840435    |
| ZFAND3    | -0,022195905 | 6,774733476 | 0,810758568 | 0,840590341 |
| LOC728190 | 0,030061999  | 5,031449921 | 0,813486492 | 0,843290421 |
| TOR1A     | 0,026657345  | 6,050191112 | 0,814698056 | 0,844418003 |
| EFTUD1    | -0,027990987 | 5,048893897 | 0,816088656 | 0,845730782 |
| PLXNB1    | -0,03354201  | 6,729358224 | 0,819487346 | 0,849123873 |
| KDM4B     | 0,038868758  | 5,721435956 | 0,82021064  | 0,849744205 |
| VEZT      | 0,024018525  | 6,629459786 | 0,823053289 | 0,852559681 |
| GTF2F1    | 0,027817606  | 6,735627467 | 0,823889621 | 0,853296374 |
| KDM5A     | 0,034761717  | 6,788323955 | 0,82422865  | 0,853517868 |
| ZNF625    | 0,064392488  | 0,835049902 | 0,8261781   | 0,85540669  |
| AMFR      | -0,023869913 | 7,399902207 | 0,826997001 | 0,856124571 |
| DHDDS     | -0,023752054 | 5,567801605 | 0,82718711  | 0,856191393 |
| NIPBL     | -0,028570026 | 6,900165533 | 0,828490439 | 0,857410275 |
| PKNOX1    | -0,015451092 | 4,948535149 | 0,828994632 | 0,857645878 |
| PDGFC     | 0,068153158  | 5,530157863 | 0,829040194 | 0,857645878 |
| SENP7     | 0,036216476  | 4,50701929  | 0,829095414 | 0,857645878 |
| POU2F2    | -0,044911453 | 3,257787336 | 0,829749219 | 0,858192011 |
| TRRAP     | -0,030315677 | 6,757603339 | 0,830117223 | 0,858442424 |
| FMR1      | -0,020670535 | 6,191944134 | 0,831724252 | 0,85997387  |

|          |              |             |             |             |
|----------|--------------|-------------|-------------|-------------|
| CLSTN3   | 0,047362559  | 6,550035266 | 0,831886594 | 0,860011322 |
| XBP1     | -0,035763906 | 8,923823937 | 0,832516045 | 0,860409812 |
| MICB     | 0,066389527  | 3,903798766 | 0,832540894 | 0,860409812 |
| AIM1     | 0,059116169  | 6,821553109 | 0,832650586 | 0,860409812 |
| MEPCE    | -0,023011243 | 6,329479784 | 0,834815382 | 0,862516074 |
| HAUS4    | 0,035952062  | 6,116689266 | 0,837410419 | 0,865066148 |
| CFB      | -0,046368583 | 7,280370504 | 0,838261991 | 0,86581468  |
| BRD3     | -0,026738448 | 5,775617684 | 0,838563126 | 0,865994541 |
| ASNSD1   | 0,027597338  | 5,987944675 | 0,838790711 | 0,866098403 |
| MAD1L1   | -0,028145481 | 5,278882292 | 0,840322958 | 0,867549167 |
| ZFAND6   | 0,034660502  | 6,691124485 | 0,840822734 | 0,867933731 |
| CLK3     | -0,019149061 | 5,689353594 | 0,841209692 | 0,868085982 |
| ZDBF2    | -0,038777491 | 4,035262135 | 0,841224837 | 0,868085982 |
| COG7     | -0,01646356  | 5,127540586 | 0,841683279 | 0,868427641 |
| SMAD5    | 0,027693578  | 6,547998629 | 0,842166715 | 0,868794982 |
| ALMS1    | 0,04305569   | 5,438695736 | 0,842713348 | 0,869227397 |
| MTOR     | -0,023771675 | 6,570844407 | 0,843855707 | 0,870274057 |
| NCSTN    | 0,029685912  | 7,919110618 | 0,844555506 | 0,870863595 |
| OSBPL2   | 0,024066308  | 6,164633039 | 0,844771223 | 0,870954788 |
| SUV420H1 | -0,021386931 | 5,935161198 | 0,845291067 | 0,871359    |
| SEC11A   | -0,01959886  | 7,351989098 | 0,846201534 | 0,872165698 |
| HERC4    | 0,020460344  | 5,80788152  | 0,847501212 | 0,873373245 |
| RPS23    | 0,035667099  | 9,787102417 | 0,849082645 | 0,87487074  |
| ELF4     | 0,033019972  | 6,360016936 | 0,849229514 | 0,874889871 |
| DNAJC5   | 0,031684597  | 7,298623542 | 0,850143874 | 0,875699558 |
| GALNT11  | -0,02790899  | 6,261210491 | 0,850288447 | 0,875716194 |
| MVD      | 0,04603122   | 5,621168952 | 0,850634723 | 0,875940528 |
| STC1     | -0,039305209 | 5,893155045 | 0,850853312 | 0,876033329 |
| ZNF142   | -0,022260764 | 5,038213363 | 0,851386535 | 0,876449997 |
| BCL10    | 0,031270325  | 5,391227178 | 0,852415611 | 0,877376913 |
| PMEPA1   | 0,08333424   | 6,919290516 | 0,853366648 | 0,878223238 |
| CTBP1    | -0,022478895 | 7,174887727 | 0,855250238 | 0,880028878 |
| ARL5A    | 0,025765916  | 6,340579767 | 0,85554339  | 0,880124046 |
| MRPS31   | -0,01901747  | 4,21562481  | 0,855600866 | 0,880124046 |
| PICK1    | -0,021089496 | 4,799791771 | 0,855861937 | 0,880259812 |
| EPS8     | -0,035200529 | 7,101732341 | 0,857470283 | 0,881781008 |
| CTCF     | 0,018329973  | 6,486628936 | 0,857643299 | 0,881825943 |
| BAG3     | -0,024772518 | 7,140092016 | 0,858895181 | 0,882979985 |
| B4GALT1  | 0,041523949  | 8,599380093 | 0,859103738 | 0,883061258 |
| EAPP     | 0,026944116  | 5,726593503 | 0,860116391 | 0,883968903 |
| INVS     | 0,02879986   | 4,126164309 | 0,860387625 | 0,884114409 |
| NANOG    | -0,022633264 | 0,811501723 | 0,861573875 | 0,885199978 |
| ZMIZ2    | 0,033345289  | 6,970392156 | 0,862310375 | 0,885823207 |
| PLXNB2   | 0,038904393  | 9,003314584 | 0,863728002 | 0,887145843 |
| MAPK14   | -0,015976588 | 6,773514017 | 0,864460668 | 0,887764653 |
| ARL5B    | 0,033475167  | 4,760575127 | 0,86641171  | 0,889615981 |
| TRA2A    | 0,023374263  | 6,266589862 | 0,866524321 | 0,889615981 |
| ZCCHC11  | 0,022555482  | 5,442024238 | 0,867623323 | 0,890610182 |
| APOOL    | -0,019108562 | 3,619186702 | 0,868059568 | 0,89092387  |
| MDM2     | 0,026027198  | 7,316345803 | 0,868647036 | 0,891392647 |



|           |              |             |             |             |
|-----------|--------------|-------------|-------------|-------------|
| SSU72     | 0,020185146  | 7,323394421 | 0,869992374 | 0,89263888  |
| AP4S1     | -0,020982158 | 2,76937555  | 0,871222681 | 0,893766732 |
| OGFRL1    | 0,038038611  | 4,798115792 | 0,871929106 | 0,894356885 |
| TNIP2     | 0,024467735  | 5,555765172 | 0,87212737  | 0,894425708 |
| CDC42EP4  | -0,026650626 | 6,892581088 | 0,872591641 | 0,894767278 |
| CHI3L1    | -0,031136472 | 7,108645535 | 0,872846896 | 0,89489445  |
| OSTF1     | -0,020882861 | 6,640510322 | 0,87388944  | 0,895828637 |
| LYRM1     | -0,02306801  | 5,36164462  | 0,874178229 | 0,89595127  |
| WDR47     | 0,034476931  | 5,127108439 | 0,87431602  | 0,89595127  |
| NANS      | -0,017341806 | 6,002383923 | 0,874479428 | 0,89595127  |
| TNFRSF12A | -0,029331861 | 6,214465349 | 0,874640081 | 0,89595127  |
| DDX20     | 0,019202218  | 4,715066233 | 0,874666022 | 0,89595127  |
| ZNF782    | -0,020711849 | 1,607909204 | 0,875065873 | 0,896226222 |
| ZNF830    | -0,014604972 | 4,317794813 | 0,875556202 | 0,896471051 |
| OCIAD1    | 0,025784456  | 7,169365023 | 0,875567854 | 0,896471051 |
| RNF139    | 0,022325785  | 6,130724915 | 0,877267405 | 0,89807633  |
| CCDC88C   | 0,038248443  | 6,028010654 | 0,881700035 | 0,902478616 |
| FZD1      | -0,024592904 | 6,253008488 | 0,881902862 | 0,902550745 |
| LCORL     | 0,023609101  | 2,767448483 | 0,883230502 | 0,903773829 |
| PTPRK     | -0,018245575 | 7,153211806 | 0,883686721 | 0,9040109   |
| PPTC7     | -0,016948073 | 5,684570856 | 0,883727329 | 0,9040109   |
| HDAC4     | -0,020367993 | 4,933721898 | 0,8838892   | 0,904040866 |
| KBTBD7    | -0,017224921 | 3,26288091  | 0,884520966 | 0,90455136  |
| STX18     | -0,01420396  | 5,093003156 | 0,884815882 | 0,904717274 |
| RING1     | -0,013119024 | 5,892977075 | 0,88614894  | 0,905944471 |
| EEF2      | 0,027248951  | 11,46177076 | 0,889023726 | 0,908747233 |
| FBXO11    | -0,013226517 | 6,632728854 | 0,889628033 | 0,909228651 |
| HCFC1R1   | -0,016037902 | 5,765399089 | 0,891275294 | 0,910775697 |
| CARS2     | -0,013149261 | 5,497846827 | 0,891497017 | 0,910865772 |
| CIC       | -0,018121948 | 6,769005483 | 0,892370173 | 0,911621305 |
| IFITM1    | -0,021420145 | 7,837937007 | 0,892596422 | 0,911715848 |
| SLC30A5   | -0,011971541 | 6,181167672 | 0,89328096  | 0,912278399 |
| ARIH1     | -0,011531376 | 6,84834755  | 0,893582485 | 0,912387943 |
| AP3S2     | -0,011785665 | 6,558196886 | 0,893655825 | 0,912387943 |
| WFDC2     | -0,020897494 | 7,059709475 | 0,895124146 | 0,913750232 |
| YTHDF3    | -0,012338871 | 6,939450328 | 0,895706956 | 0,914097132 |
| ZCCHC10   | 0,024493741  | 4,573727395 | 0,895732077 | 0,914097132 |
| COG3      | -0,01281187  | 5,279713122 | 0,895893037 | 0,914124588 |
| UBQLN2    | -0,013430888 | 6,424558196 | 0,896397025 | 0,914501992 |
| M6PR      | 0,019036714  | 7,672884254 | 0,898659788 | 0,916666986 |
| SIN3A     | -0,012006798 | 6,919587074 | 0,898788014 | 0,916666986 |
| SACS      | -0,016780118 | 4,513530868 | 0,899393279 | 0,917147117 |
| FLJ45340  | 0,030105946  | 5,908357123 | 0,899728626 | 0,917351899 |
| MYO5A     | -0,016579201 | 6,306225593 | 0,902046247 | 0,91957742  |
| CYBA      | 0,042912995  | 7,343496126 | 0,902608322 | 0,920012877 |
| MLX       | 0,017220407  | 6,537325016 | 0,903828107 | 0,921118496 |
| PCK2      | -0,015409334 | 5,97853246  | 0,904259993 | 0,921420934 |
| LPP       | 0,028459642  | 5,083226335 | 0,904850937 | 0,921885334 |
| TMC6      | 0,026104882  | 6,613181544 | 0,905646107 | 0,922557635 |
| RFK       | -0,016254018 | 5,333155046 | 0,90620859  | 0,922992737 |

|         |              |             |             |             |
|---------|--------------|-------------|-------------|-------------|
| EXOC4   | -0,010266323 | 6,795600417 | 0,907338834 | 0,9240059   |
| EXOSC10 | 0,014301089  | 6,304300744 | 0,909752064 | 0,92632512  |
| SMU1    | 0,019044649  | 7,029021446 | 0,910189781 | 0,926632445 |
| VAC14   | -0,010197664 | 6,289874775 | 0,911873572 | 0,928208074 |
| TBK1    | -0,009326052 | 5,435433059 | 0,912719868 | 0,928930862 |
| EXOC7   | -0,008860853 | 7,533832248 | 0,915450408 | 0,93157086  |
| CALM2   | -0,012178024 | 9,746731665 | 0,916136242 | 0,932129667 |
| SHPK    | -0,010164444 | 4,631933669 | 0,916919978 | 0,932787906 |
| TBCD    | 0,02232877   | 6,810024283 | 0,917919908 | 0,933461764 |
| SCCPDH  | -0,012793205 | 6,123227408 | 0,917939436 | 0,933461764 |
| USO1    | -0,010278593 | 7,139959652 | 0,917993047 | 0,933461764 |
| DBI     | -0,01172081  | 7,734353582 | 0,918585178 | 0,933868185 |
| POLD4   | 0,01835349   | 6,419671519 | 0,918666635 | 0,933868185 |
| CYB5B   | -0,01054478  | 6,94020991  | 0,919469983 | 0,934545508 |
| CRAT    | 0,030277655  | 5,609987589 | 0,921541276 | 0,936511171 |
| NAA16   | 0,016066621  | 4,139825173 | 0,921793092 | 0,936627491 |
| HADHB   | -0,007745806 | 7,335862076 | 0,92195872  | 0,936656215 |
| FIS1    | -0,010612608 | 6,764036612 | 0,923656275 | 0,938241045 |
| PNMA1   | -0,010519757 | 5,637592467 | 0,923854491 | 0,938302618 |
| COX7C   | 0,017632396  | 7,707762231 | 0,92409586  | 0,938407992 |
| ZNF14   | 0,024228876  | 3,574260302 | 0,924388593 | 0,938565488 |
| FUCA2   | 0,020718678  | 6,623094555 | 0,926046583 | 0,940108925 |
| CTNND1  | -0,009256544 | 9,238263419 | 0,926241676 | 0,940167012 |
| AP4B1   | -0,007534548 | 4,421073324 | 0,928320268 | 0,942136613 |
| CNPY4   | -0,009407793 | 4,180997634 | 0,928797065 | 0,942480236 |
| TROVE2  | 0,009931665  | 6,076747774 | 0,929203878 | 0,942752751 |
| TAF9B   | 0,018857463  | 5,449251828 | 0,93028258  | 0,943706771 |
| MAP4K4  | -0,008872129 | 7,694290813 | 0,930966293 | 0,944259876 |
| SRI     | 0,020416854  | 7,018943609 | 0,931777286 | 0,944941897 |
| POGZ    | -0,007986055 | 6,681235211 | 0,932084036 | 0,945023538 |
| TMEM70  | 0,018062933  | 5,374317663 | 0,932134963 | 0,945023538 |
| TPM3    | 0,010820735  | 9,34737866  | 0,93266183  | 0,945417128 |
| ZNF827  | -0,008792609 | 3,494801873 | 0,933477621 | 0,946103433 |
| MRPL14  | 0,019978247  | 6,483516227 | 0,934059743 | 0,94655274  |
| NDUFA5  | 0,014350116  | 6,184155028 | 0,935914369 | 0,948152168 |
| SMARCE1 | 0,010523353  | 7,437511549 | 0,935916152 | 0,948152168 |
| APOE    | 0,046288188  | 8,455951013 | 0,937522217 | 0,949638146 |
| THOC2   | -0,006143829 | 6,331523381 | 0,939422284 | 0,95142144  |
| FRS2    | 0,015372261  | 5,594711084 | 0,940898222 | 0,952656095 |
| GXYLT2  | -0,005292693 | 2,77868649  | 0,940927315 | 0,952656095 |
| HEATR7A | 0,016708437  | 5,463564126 | 0,941060486 | 0,952656095 |
| SLCO3A1 | -0,006309862 | 6,637253205 | 0,941284315 | 0,952741241 |
| MTSS1L  | 0,022362395  | 6,419713517 | 0,943996861 | 0,955344998 |
| SPPL2A  | 0,012637723  | 6,193932977 | 0,944399253 | 0,955610403 |
| CFDP1   | -0,005819303 | 5,919604849 | 0,944925454 | 0,956000989 |
| PLEC    | -0,004943428 | 9,265070615 | 0,945526823 | 0,956467498 |
| CTBP2   | -0,005155824 | 6,59971531  | 0,947213655 | 0,958031729 |
| RUNX3   | -0,004801158 | 5,458078566 | 0,947640886 | 0,958321696 |
| LY6E    | -0,003048289 | 8,705456689 | 0,949187295 | 0,959743204 |
| SH3GLB2 | -0,004751325 | 5,987240599 | 0,951100101 | 0,961534706 |

|           |              |             |             |             |
|-----------|--------------|-------------|-------------|-------------|
| EFR3A     | 0,009988456  | 7,184540216 | 0,951493179 | 0,961789503 |
| TP53I3    | -0,003066799 | 5,158945029 | 0,952667889 | 0,962834198 |
| LOC253039 | -0,004399675 | 4,591961959 | 0,952863405 | 0,962889087 |
| ZNF117    | 0,032260366  | 5,636297577 | 0,953411332 | 0,963300026 |
| RAB4B     | 0,016154044  | 5,271275982 | 0,953722047 | 0,963384493 |
| CD164     | -0,004228591 | 8,859249859 | 0,953777491 | 0,963384493 |
| MAX       | 0,006797032  | 6,431735431 | 0,954616895 | 0,963927724 |
| LYRM7     | 0,010231446  | 4,928330665 | 0,954703365 | 0,963927724 |
| TBC1D14   | 0,01252748   | 6,873353504 | 0,954739382 | 0,963927724 |
| FPGS      | -0,003983412 | 6,159603325 | 0,955258972 | 0,964309538 |
| SURF1     | 0,012076289  | 5,786790172 | 0,956229112 | 0,965145991 |
| KIAA0753  | 0,011324633  | 4,309811634 | 0,956809586 | 0,965588955 |
| LPCAT2    | 0,016535259  | 5,804356701 | 0,957373288 | 0,966014864 |
| SNX9      | 0,008864963  | 6,364517953 | 0,959250222 | 0,967765537 |
| BLOC1S1   | -0,003016436 | 6,157739598 | 0,959806101 | 0,968183107 |
| UBN1      | 0,011601359  | 6,619208547 | 0,960857172 | 0,969099993 |
| ZNF271    | 0,010100789  | 5,169858082 | 0,96194883  | 0,970057538 |
| CHD4      | 0,009703418  | 8,474535854 | 0,963763351 | 0,971743648 |
| RABAC1    | -0,001802882 | 6,631124325 | 0,964247792 | 0,972088364 |
| KIN       | -0,002418738 | 3,763416548 | 0,964485735 | 0,972184512 |
| PITPNC1   | -1,68935E-05 | 4,945263157 | 0,964836135 | 0,972393971 |
| RNF214    | -0,002388237 | 4,509360763 | 0,965512833 | 0,972932172 |
| SIGLEC10  | 0,020158956  | 4,566584099 | 0,966390594 | 0,973672792 |
| LOC493754 | -0,002242276 | 5,233599637 | 0,966555586 | 0,97369516  |
| DIS3L     | 0,008324413  | 5,481182227 | 0,966769915 | 0,973767216 |
| IWS1      | -0,002092426 | 6,176808576 | 0,967443659 | 0,974301922 |
| ARL6IP4   | -0,00180713  | 7,150074373 | 0,968220608 | 0,974923691 |
| ZNF462    | 0,023521943  | 4,817951622 | 0,968346995 | 0,974923691 |
| FAM106A   | -0,002149038 | 1,104445659 | 0,969512429 | 0,975952945 |
| STX5      | -0,001820111 | 6,087158955 | 0,969758772 | 0,976056836 |
| NAP1L1    | 0,00728781   | 9,10711167  | 0,973166337 | 0,97934198  |
| TIMP1     | 0,003089652  | 8,86599545  | 0,973788381 | 0,979823369 |
| ARCN1     | 0,005874657  | 8,126203043 | 0,97459855  | 0,980493879 |
| RAB6A     | -0,000886679 | 8,053270029 | 0,975493724 | 0,981249699 |
| GBA       | -0,000524715 | 6,821396607 | 0,97592768  | 0,981541424 |
| YIPF5     | -0,000773014 | 6,333366697 | 0,976388964 | 0,981860544 |
| SRP14     | -0,000714575 | 7,977064727 | 0,977269104 | 0,982600711 |
| POLR2C    | -0,000266491 | 7,00694103  | 0,978254036 | 0,983446008 |
| ERLEC1    | 0,007993743  | 7,167567239 | 0,978621424 | 0,983670326 |
| TRAPPC6B  | 0,006613443  | 5,376846575 | 0,978816253 | 0,983721154 |
| PRKAA1    | 0,000180031  | 6,850235114 | 0,979821374 | 0,984548156 |
| DNAJC13   | 0,006869454  | 6,530085201 | 0,979927897 | 0,984548156 |
| TPCN2     | 0,01208094   | 4,565792427 | 0,980382753 | 0,984860046 |
| MAP4K2    | 0,000699255  | 5,33650222  | 0,980743091 | 0,985076909 |
| SHPRH     | 0,00627614   | 4,479351623 | 0,98159544  | 0,985721429 |
| TMEM214   | 0,005219625  | 7,310618284 | 0,981673886 | 0,985721429 |
| LOC283922 | 0,002640234  | 2,526105618 | 0,982174641 | 0,986079045 |
| SKP1      | 0,000919137  | 8,404892526 | 0,984470906 | 0,988238938 |
| FLOT1     | 0,001588139  | 8,093091657 | 0,985232169 | 0,988776327 |
| FAM100A   | 0,006379664  | 4,627738623 | 0,985296252 | 0,988776327 |

|         |             |             |             |             |
|---------|-------------|-------------|-------------|-------------|
| PML     | 0,003000188 | 7,245480683 | 0,986326606 | 0,989664674 |
| NDRG3   | 0,005018385 | 6,11249561  | 0,986940908 | 0,990135362 |
| CNOT4   | 0,000659378 | 5,00663668  | 0,988191429 | 0,991244094 |
| MT1F    | 0,008737509 | 3,281918426 | 0,99035925  | 0,993167427 |
| ZNF317  | 0,005148364 | 5,502675417 | 0,990506181 | 0,993167427 |
| ACTR10  | 0,005081718 | 6,288241364 | 0,99054578  | 0,993167427 |
| NAMPT   | 0,022468595 | 9,616661922 | 0,990867301 | 0,993343741 |
| EIF4G3  | 0,002445697 | 6,481401408 | 0,99311134  | 0,995447042 |
| FADS1   | 0,012810189 | 6,9014123   | 0,993624875 | 0,995815406 |
| COMT    | 0,00385856  | 7,538763367 | 0,99451869  | 0,996557566 |
| FAM175A | 0,003780689 | 4,187999376 | 0,994666579 | 0,996557566 |
| SOS1    | 0,002418535 | 6,421209939 | 0,994803835 | 0,996557566 |
| SNX5    | 0,003187599 | 7,23393712  | 0,995375568 | 0,996983843 |
| GNA13   | 0,003322918 | 7,531332968 | 0,995654836 | 0,997117099 |
| EDEM3   | 0,002215733 | 6,280792318 | 0,996010804 | 0,997327117 |
| UROD    | 0,003704202 | 6,1720869   | 0,996555305 | 0,99772583  |
| AMIGO3  | 0,008175796 | 2,187473586 | 0,997310366 | 0,998217056 |
| ELF3    | 0,016283273 | 8,39502298  | 0,997338731 | 0,998217056 |
| ARL8B   | 0,002985914 | 7,508478382 | 0,997726007 | 0,998319659 |
| AP3D1   | 0,003543626 | 7,725356857 | 0,997793038 | 0,998319659 |
| PFDN5   | 0,006610587 | 8,527623863 | 0,997880451 | 0,998319659 |
| UFC1    | 0,004760159 | 7,038000657 | 0,999052535 | 0,999286837 |
| CPE     | 0,021428819 | 7,184802244 | 0,999140292 | 0,999286837 |
| SNX3    | 0,004124787 | 7,867605061 | 0,999362278 | 0,999362278 |

**Table S2\_A: Lung adenocarcinoma (LUAD) ID from TCGA.**

LUAD patients ID available on TCGA on 07 June 2016 and used for the analysis.

| <b>Tumor Samples</b>         | <b>Normal Samples</b>        |
|------------------------------|------------------------------|
| TCGA.05.4244.01A.01R.1107.07 | TCGA.38.4632.11A.01R.1755.07 |
| TCGA.05.4249.01A.01R.1107.07 | TCGA.44.5645.11A.01R.1628.07 |
| TCGA.05.4250.01A.01R.1107.07 | TCGA.44.6144.11A.01R.1755.07 |
| TCGA.05.4397.01A.01R.1206.07 | TCGA.44.6145.11A.01R.1858.07 |
| TCGA.05.4398.01A.01R.1206.07 | TCGA.44.6146.11A.01R.1858.07 |
| TCGA.05.4403.01A.01R.1206.07 | TCGA.44.6147.11A.01R.1858.07 |
| TCGA.05.4417.01A.22R.1858.07 | TCGA.44.6148.11A.01R.1858.07 |
| TCGA.05.4418.01A.01R.1206.07 | TCGA.44.6776.11A.01R.1858.07 |
| TCGA.05.4420.01A.01R.1206.07 | TCGA.44.6777.11A.01R.1858.07 |
| TCGA.05.4422.01A.01R.1206.07 | TCGA.44.6778.11A.01R.1858.07 |
| TCGA.05.4424.01A.22R.1858.07 | TCGA.49.4490.11A.01R.1858.07 |
| TCGA.05.4426.01A.01R.1206.07 | TCGA.49.4512.11A.01R.1858.07 |
| TCGA.05.4427.01A.21R.1858.07 | TCGA.49.6742.11A.01R.1858.07 |
| TCGA.05.4430.01A.02R.1206.07 | TCGA.49.6743.11A.01R.1858.07 |
| TCGA.05.4432.01A.01R.1206.07 | TCGA.49.6744.11A.01R.1858.07 |
| TCGA.05.4434.01A.01R.1206.07 | TCGA.49.6745.11A.01R.1858.07 |
| TCGA.05.5420.01A.01R.1628.07 | TCGA.50.5930.11A.01R.1755.07 |
| TCGA.05.5423.01A.01R.1628.07 | TCGA.50.5931.11A.01R.1858.07 |
| TCGA.05.5425.01A.02R.1628.07 | TCGA.50.5932.11A.01R.1755.07 |
| TCGA.05.5428.01A.01R.1628.07 | TCGA.50.5933.11A.01R.1755.07 |
| TCGA.05.5429.01A.01R.1628.07 | TCGA.50.5935.11A.01R.1858.07 |
| TCGA.05.5715.01A.01R.1628.07 | TCGA.55.6968.11A.01R.1949.07 |
| TCGA.35.3615.01A.01R.0946.07 | TCGA.55.6969.11A.01R.1949.07 |
| TCGA.35.4122.01A.01R.1107.07 | TCGA.55.6970.11A.01R.1949.07 |
| TCGA.35.4123.01A.01R.1107.07 | TCGA.55.6971.11A.01R.1949.07 |
| TCGA.38.4625.01A.01R.1206.07 | TCGA.55.6972.11A.01R.1949.07 |
| TCGA.38.4626.01A.01R.1206.07 | TCGA.55.6978.11A.01R.1949.07 |
| TCGA.44.2655.01A.01R.0946.07 | TCGA.55.6982.11A.01R.1949.07 |
| TCGA.44.2656.01A.02R.0946.07 | TCGA.55.6983.11A.01R.1949.07 |
| TCGA.44.2659.01A.01R.0946.07 | TCGA.55.6984.11A.01R.1949.07 |
| TCGA.44.2661.01A.01R.1107.07 | TCGA.55.6985.11A.01R.1949.07 |
| TCGA.44.2662.01A.01R.0946.07 | TCGA.91.6828.11A.01R.1858.07 |
| TCGA.44.2665.01A.01R.0946.07 | TCGA.91.6829.11A.01R.1858.07 |
| TCGA.44.2668.01A.01R.0946.07 | TCGA.91.6835.11A.01R.1858.07 |
| TCGA.44.3398.01A.01R.1107.07 | TCGA.91.6836.11A.01R.1858.07 |
| TCGA.44.3918.01A.01R.1107.07 | TCGA.91.6847.11A.01R.1949.07 |
| TCGA.44.3919.01A.02R.1107.07 | TCGA.91.6849.11A.01R.1949.07 |
| TCGA.44.4112.01A.01R.1107.07 |                              |
| TCGA.44.5643.01A.01R.1628.07 |                              |
| TCGA.44.5645.01A.01R.1628.07 |                              |

|                              |  |
|------------------------------|--|
| TCGA.44.6146.01A.11R.1755.07 |  |
| TCGA.44.6147.01A.11R.1755.07 |  |
| TCGA.44.6148.01A.11R.1755.07 |  |
| TCGA.44.6775.01A.11R.1858.07 |  |
| TCGA.44.6776.01A.11R.1858.07 |  |
| TCGA.44.6777.01A.11R.1858.07 |  |
| TCGA.44.6778.01A.11R.1858.07 |  |
| TCGA.49.4488.01A.01R.1755.07 |  |
| TCGA.49.4505.01A.01R.1206.07 |  |
| TCGA.49.4507.01A.01R.1206.07 |  |
| TCGA.49.4512.01A.21R.1858.07 |  |
| TCGA.49.4514.01A.21R.1858.07 |  |
| TCGA.49.6742.01A.11R.1858.07 |  |
| TCGA.49.6743.01A.11R.1858.07 |  |
| TCGA.49.6744.01A.11R.1858.07 |  |
| TCGA.49.6745.01A.11R.1858.07 |  |
| TCGA.49.6761.01A.31R.1949.07 |  |
| TCGA.49.6767.01A.11R.1858.07 |  |
| TCGA.50.5044.01A.21R.1858.07 |  |
| TCGA.50.5049.01A.01R.1628.07 |  |
| TCGA.50.5051.01A.21R.1858.07 |  |
| TCGA.50.5072.01A.21R.1858.07 |  |
| TCGA.50.5931.01A.11R.1755.07 |  |
| TCGA.50.5932.01A.11R.1755.07 |  |
| TCGA.50.5935.01A.11R.1755.07 |  |
| TCGA.50.5941.01A.11R.1755.07 |  |
| TCGA.50.5942.01A.21R.1755.07 |  |
| TCGA.50.5944.01A.11R.1755.07 |  |
| TCGA.50.6590.01A.12R.1858.07 |  |
| TCGA.50.6591.01A.11R.1755.07 |  |
| TCGA.50.6592.01A.11R.1755.07 |  |
| TCGA.50.6593.01A.11R.1755.07 |  |
| TCGA.50.6594.01A.11R.1755.07 |  |
| TCGA.50.6595.01A.12R.1858.07 |  |
| TCGA.50.6597.01A.11R.1858.07 |  |
| TCGA.50.6673.01A.11R.1949.07 |  |
| TCGA.55.1592.01A.01R.0946.07 |  |
| TCGA.55.1594.01A.01R.0946.07 |  |
| TCGA.55.1595.01A.01R.0946.07 |  |
| TCGA.55.1596.01A.01R.0946.07 |  |
| TCGA.55.6543.01A.11R.1755.07 |  |
| TCGA.55.6968.01A.11R.1949.07 |  |
| TCGA.55.6969.01A.11R.1949.07 |  |
| TCGA.55.6970.01A.11R.1949.07 |  |
| TCGA.55.6971.01A.11R.1949.07 |  |
| TCGA.55.6979.01A.11R.1949.07 |  |
| TCGA.55.6982.01A.11R.1949.07 |  |
| TCGA.55.6984.01A.11R.1949.07 |  |
| TCGA.55.6985.01A.11R.1949.07 |  |
| TCGA.55.6986.01A.11R.1949.07 |  |

|                              |  |
|------------------------------|--|
| TCGA.64.1676.01A.01R.0946.07 |  |
| TCGA.64.1678.01A.01R.0946.07 |  |
| TCGA.64.1680.01A.02R.0946.07 |  |
| TCGA.64.5774.01A.01R.1628.07 |  |
| TCGA.64.5775.01A.01R.1628.07 |  |
| TCGA.64.5778.01A.01R.1628.07 |  |
| TCGA.64.5779.01A.01R.1628.07 |  |
| TCGA.64.5781.01A.01R.1628.07 |  |
| TCGA.64.5815.01A.01R.1628.07 |  |
| TCGA.67.3770.01A.01R.0946.07 |  |
| TCGA.67.3771.01A.01R.0946.07 |  |
| TCGA.67.3772.01A.01R.0946.07 |  |
| TCGA.67.3773.01A.01R.0946.07 |  |
| TCGA.67.3774.01A.01R.0946.07 |  |
| TCGA.67.4679.01B.01R.1755.07 |  |
| TCGA.67.6216.01A.11R.1755.07 |  |
| TCGA.67.6217.01A.11R.1755.07 |  |
| TCGA.73.4658.01A.01R.1755.07 |  |
| TCGA.73.4662.01A.01R.1206.07 |  |
| TCGA.73.4670.01A.01R.1206.07 |  |
| TCGA.73.4675.01A.01R.1206.07 |  |
| TCGA.73.4676.01A.01R.1755.07 |  |
| TCGA.75.5122.01A.01R.1755.07 |  |
| TCGA.75.5146.01A.01R.1628.07 |  |
| TCGA.75.7025.01A.12R.1949.07 |  |
| TCGA.80.5607.01A.31R.1949.07 |  |
| TCGA.80.5611.01A.01R.1628.07 |  |
| TCGA.91.6829.01A.21R.1858.07 |  |
| TCGA.91.6830.01A.11R.1949.07 |  |
| TCGA.91.6831.01A.11R.1858.07 |  |
| TCGA.91.6835.01A.11R.1858.07 |  |
| TCGA.91.6836.01A.21R.1858.07 |  |
| TCGA.91.6840.01A.11R.1949.07 |  |
| TCGA.95.7039.01A.11R.1949.07 |  |
| TCGA.95.7043.01A.11R.1949.07 |  |

**Table S2\_B: Lung squamous cell carcinoma (LUSC) ID from TCGA.**  
LUSC patients ID available on TCGA on 07 June 2016 and used for the analysis.

| <b>Tumor Samples</b>         | <b>Normal Samples</b>        |
|------------------------------|------------------------------|
| TCGA.18.3406.01A.01R.0980.07 | TCGA.22.4593.11A.01R.1820.07 |
| TCGA.18.3407.01A.01R.0980.07 | TCGA.22.5471.11A.01R.1635.07 |
| TCGA.18.3408.01A.01R.0980.07 | TCGA.22.5472.11A.11R.1635.07 |
| TCGA.18.3409.01A.01R.0980.07 | TCGA.22.5478.11A.11R.1635.07 |
| TCGA.18.3410.01A.01R.0980.07 | TCGA.22.5481.11A.01R.1949.07 |
| TCGA.18.3411.01A.01R.0980.07 | TCGA.22.5482.11A.01R.1635.07 |
| TCGA.18.3412.01A.01R.0980.07 | TCGA.22.5483.11A.11R.1820.07 |
| TCGA.18.3414.01A.01R.0980.07 | TCGA.22.5489.11A.01R.1635.07 |
| TCGA.18.3415.01A.01R.0980.07 | TCGA.22.5491.11A.01R.1858.07 |
| TCGA.18.3416.01A.01R.0980.07 | TCGA.33.6737.11A.01R.1820.07 |
| TCGA.18.3417.01A.01R.1443.07 | TCGA.34.7107.11A.01R.1949.07 |
| TCGA.18.3419.01A.01R.0980.07 | TCGA.43.6143.11A.01R.1820.07 |
| TCGA.18.3421.01A.01R.0980.07 | TCGA.43.6647.11A.01R.1820.07 |
| TCGA.18.4083.01A.01R.1100.07 | TCGA.43.6771.11A.01R.1820.07 |
| TCGA.18.4086.01A.01R.1100.07 | TCGA.43.6773.11A.01R.1949.07 |
| TCGA.18.4721.01A.01R.1443.07 | TCGA.60.2709.11A.01R.1820.07 |
| TCGA.18.5592.01A.01R.1635.07 | TCGA.90.6837.11A.01R.1949.07 |
| TCGA.18.5595.01A.01R.1635.07 |                              |
| TCGA.21.1070.01A.01R.0692.07 |                              |
| TCGA.21.1071.01A.01R.0692.07 |                              |
| TCGA.21.1072.01A.01R.0692.07 |                              |
| TCGA.21.1075.01A.01R.0692.07 |                              |
| TCGA.21.1076.01A.02R.0692.07 |                              |
| TCGA.21.1077.01A.01R.0692.07 |                              |
| TCGA.21.1078.01A.01R.0692.07 |                              |
| TCGA.21.1079.01A.01R.0692.07 |                              |
| TCGA.21.1080.01A.01R.0692.07 |                              |
| TCGA.21.1081.01A.01R.0692.07 |                              |
| TCGA.21.1082.01A.01R.0692.07 |                              |
| TCGA.21.1083.01A.01R.0692.07 |                              |
| TCGA.21.5782.01A.01R.1635.07 |                              |
| TCGA.21.5784.01A.01R.1635.07 |                              |
| TCGA.21.5786.01A.01R.1635.07 |                              |
| TCGA.21.5787.01A.01R.1635.07 |                              |
| TCGA.22.0940.01A.01R.0692.07 |                              |
| TCGA.22.0944.01A.01R.0692.07 |                              |
| TCGA.22.1002.01A.01R.0692.07 |                              |
| TCGA.22.1005.01A.01R.0692.07 |                              |
| TCGA.22.1011.01A.01R.0692.07 |                              |
| TCGA.22.1012.01A.01R.0692.07 |                              |
| TCGA.22.1016.01A.01R.0692.07 |                              |
| TCGA.22.1017.01A.01R.0692.07 |                              |



|                              |  |
|------------------------------|--|
| TCGA.22.4591.01A.01R.1201.07 |  |
| TCGA.22.4593.01A.21R.1820.07 |  |
| TCGA.22.4594.01A.01R.1201.07 |  |
| TCGA.22.4595.01A.01R.1201.07 |  |
| TCGA.22.4596.01A.01R.1201.07 |  |
| TCGA.22.4599.01A.01R.1443.07 |  |
| TCGA.22.4601.01A.01R.1443.07 |  |
| TCGA.22.4604.01A.01R.1201.07 |  |
| TCGA.22.4607.01A.01R.1201.07 |  |
| TCGA.22.4613.01A.01R.1443.07 |  |
| TCGA.22.5471.01A.01R.1635.07 |  |
| TCGA.22.5472.01A.01R.1635.07 |  |
| TCGA.22.5473.01A.01R.1635.07 |  |
| TCGA.22.5474.01A.01R.1635.07 |  |
| TCGA.22.5477.01A.01R.1635.07 |  |
| TCGA.22.5478.01A.01R.1635.07 |  |
| TCGA.22.5479.01A.31R.1949.07 |  |
| TCGA.22.5480.01A.01R.1635.07 |  |
| TCGA.22.5481.01A.31R.1949.07 |  |
| TCGA.22.5482.01A.01R.1635.07 |  |
| TCGA.22.5483.01A.01R.1820.07 |  |
| TCGA.22.5485.01A.01R.1635.07 |  |
| TCGA.22.5489.01A.01R.1635.07 |  |
| TCGA.22.5491.01A.01R.1635.07 |  |
| TCGA.22.5492.01A.01R.1635.07 |  |
| TCGA.33.4532.01A.01R.1201.07 |  |
| TCGA.33.4533.01A.01R.1201.07 |  |
| TCGA.33.4538.01A.01R.1201.07 |  |
| TCGA.33.4547.01A.01R.1201.07 |  |
| TCGA.33.4566.01A.01R.1443.07 |  |
| TCGA.33.4582.01A.01R.1443.07 |  |
| TCGA.33.4583.01A.01R.1443.07 |  |
| TCGA.33.4586.01A.01R.1443.07 |  |
| TCGA.33.6737.01A.11R.1820.07 |  |
| TCGA.33.6738.01A.11R.1949.07 |  |
| TCGA.34.2596.01A.01R.0851.07 |  |
| TCGA.34.2600.01A.01R.0851.07 |  |
| TCGA.34.2608.01A.02R.0851.07 |  |
| TCGA.34.5231.01A.21R.1820.07 |  |
| TCGA.34.5232.01A.21R.1820.07 |  |
| TCGA.34.5234.01A.01R.1635.07 |  |
| TCGA.34.5236.01A.21R.1820.07 |  |
| TCGA.34.5239.01A.21R.1820.07 |  |
| TCGA.34.5240.01A.01R.1443.07 |  |
| TCGA.34.5241.01A.01R.1443.07 |  |
| TCGA.34.5927.01A.11R.1820.07 |  |
| TCGA.34.5928.01A.11R.1820.07 |  |
| TCGA.34.5929.01A.11R.1820.07 |  |
| TCGA.34.7107.01A.11R.1949.07 |  |
| TCGA.37.3783.01A.01R.1201.07 |  |

|                              |  |
|------------------------------|--|
| TCGA.37.3789.01A.01R.0980.07 |  |
| TCGA.37.3792.01A.01R.0980.07 |  |
| TCGA.37.4129.01A.01R.1100.07 |  |
| TCGA.37.4130.01A.01R.1100.07 |  |
| TCGA.37.4132.01A.01R.1100.07 |  |
| TCGA.37.4133.01A.01R.1100.07 |  |
| TCGA.37.4135.01A.01R.1100.07 |  |
| TCGA.37.4141.01A.02R.1100.07 |  |
| TCGA.37.5819.01A.01R.1635.07 |  |
| TCGA.39.5011.01A.01R.1443.07 |  |
| TCGA.39.5016.01A.01R.1443.07 |  |
| TCGA.39.5019.01A.01R.1820.07 |  |
| TCGA.39.5021.01A.01R.1443.07 |  |
| TCGA.39.5022.01A.21R.1820.07 |  |
| TCGA.39.5024.01A.21R.1820.07 |  |
| TCGA.39.5027.01A.21R.1820.07 |  |
| TCGA.39.5028.01A.01R.1443.07 |  |
| TCGA.39.5029.01A.01R.1443.07 |  |
| TCGA.39.5030.01A.01R.1443.07 |  |
| TCGA.39.5031.01A.01R.1443.07 |  |
| TCGA.39.5034.01A.01R.1443.07 |  |
| TCGA.39.5035.01A.01R.1443.07 |  |
| TCGA.39.5036.01A.01R.1443.07 |  |
| TCGA.39.5037.01A.01R.1443.07 |  |
| TCGA.39.5039.01A.01R.1443.07 |  |
| TCGA.43.2578.01A.01R.0851.07 |  |
| TCGA.43.2581.01A.01R.0851.07 |  |
| TCGA.43.3394.01A.01R.0980.07 |  |
| TCGA.43.3920.01A.01R.0980.07 |  |
| TCGA.43.5668.01A.01R.1635.07 |  |
| TCGA.43.6143.01A.11R.1820.07 |  |
| TCGA.43.6647.01A.11R.1820.07 |  |
| TCGA.43.6770.01A.11R.1820.07 |  |
| TCGA.43.6771.01A.11R.1820.07 |  |
| TCGA.43.6773.01A.41R.1949.07 |  |
| TCGA.46.3765.01A.01R.0980.07 |  |
| TCGA.46.3766.01A.01R.0980.07 |  |
| TCGA.46.3767.01A.01R.0980.07 |  |
| TCGA.46.3768.01A.01R.0980.07 |  |
| TCGA.46.3769.01A.01R.0980.07 |  |
| TCGA.46.6025.01A.11R.1820.07 |  |
| TCGA.46.6026.01A.11R.1820.07 |  |
| TCGA.51.4079.01A.01R.1100.07 |  |
| TCGA.51.4080.01A.01R.1100.07 |  |
| TCGA.51.4081.01A.01R.1100.07 |  |
| TCGA.56.1622.01A.01R.0692.07 |  |
| TCGA.56.5897.01A.11R.1635.07 |  |
| TCGA.56.5898.01A.11R.1635.07 |  |
| TCGA.56.6545.01A.11R.1820.07 |  |
| TCGA.56.6546.01A.11R.1820.07 |  |

|                              |  |
|------------------------------|--|
| TCGA.60.2695.01A.01R.0851.07 |  |
| TCGA.60.2696.01A.01R.0851.07 |  |
| TCGA.60.2698.01A.01R.0851.07 |  |
| TCGA.60.2706.01A.01R.0851.07 |  |
| TCGA.60.2707.01A.01R.0851.07 |  |
| TCGA.60.2708.01A.01R.0851.07 |  |
| TCGA.60.2709.01A.21R.1820.07 |  |
| TCGA.60.2710.01A.01R.0851.07 |  |
| TCGA.60.2711.01A.01R.0851.07 |  |
| TCGA.60.2712.01A.01R.0851.07 |  |
| TCGA.60.2713.01A.01R.0851.07 |  |
| TCGA.60.2714.01A.01R.0851.07 |  |
| TCGA.60.2715.01A.01R.0851.07 |  |
| TCGA.60.2716.01A.01R.0851.07 |  |
| TCGA.60.2719.01A.01R.0851.07 |  |
| TCGA.60.2720.01A.01R.0851.07 |  |
| TCGA.60.2721.01A.01R.0851.07 |  |
| TCGA.60.2722.01A.01R.0851.07 |  |
| TCGA.60.2723.01A.01R.0851.07 |  |
| TCGA.60.2724.01A.01R.0851.07 |  |
| TCGA.60.2725.01A.01R.1201.07 |  |
| TCGA.60.2726.01A.01R.0851.07 |  |
| TCGA.63.5128.01A.01R.1443.07 |  |
| TCGA.63.5131.01A.01R.1443.07 |  |
| TCGA.63.6202.01A.11R.1820.07 |  |
| TCGA.63.7020.01A.11R.1949.07 |  |
| TCGA.63.7021.01A.11R.1949.07 |  |
| TCGA.63.7022.01A.11R.1949.07 |  |
| TCGA.63.7023.01A.11R.1949.07 |  |
| TCGA.66.2727.01A.01R.0980.07 |  |
| TCGA.66.2734.01A.01R.0980.07 |  |
| TCGA.66.2737.01A.01R.0980.07 |  |
| TCGA.66.2742.01A.01R.0980.07 |  |
| TCGA.66.2744.01A.01R.0980.07 |  |
| TCGA.66.2753.01A.01R.0980.07 |  |
| TCGA.66.2754.01A.01R.0980.07 |  |
| TCGA.66.2755.01A.01R.0851.07 |  |
| TCGA.66.2756.01A.01R.0851.07 |  |
| TCGA.66.2757.01A.01R.0851.07 |  |
| TCGA.66.2758.01A.02R.0851.07 |  |
| TCGA.66.2759.01A.01R.0851.07 |  |
| TCGA.66.2763.01A.01R.0851.07 |  |
| TCGA.66.2765.01A.01R.0851.07 |  |
| TCGA.66.2766.01A.01R.0851.07 |  |
| TCGA.66.2767.01A.01R.0851.07 |  |
| TCGA.66.2768.01A.01R.0851.07 |  |
| TCGA.66.2769.01A.02R.0851.07 |  |
| TCGA.66.2770.01A.01R.0851.07 |  |
| TCGA.66.2771.01A.01R.0980.07 |  |
| TCGA.66.2773.01A.01R.1201.07 |  |

|                              |  |
|------------------------------|--|
| TCGA.66.2777.01A.01R.1201.07 |  |
| TCGA.66.2778.01A.02R.0851.07 |  |
| TCGA.66.2780.01A.01R.0851.07 |  |
| TCGA.66.2781.01A.01R.0851.07 |  |
| TCGA.66.2782.01A.01R.0851.07 |  |
| TCGA.66.2783.01A.01R.1201.07 |  |
| TCGA.66.2785.01A.01R.0851.07 |  |
| TCGA.66.2786.01A.01R.0851.07 |  |
| TCGA.66.2787.01A.01R.0980.07 |  |
| TCGA.66.2788.01A.01R.0980.07 |  |
| TCGA.66.2789.01A.01R.0980.07 |  |
| TCGA.66.2790.01A.01R.0980.07 |  |
| TCGA.66.2791.01A.01R.0980.07 |  |
| TCGA.66.2792.01A.01R.0980.07 |  |
| TCGA.66.2793.01A.01R.1201.07 |  |
| TCGA.66.2794.01A.01R.1201.07 |  |
| TCGA.66.2795.01A.02R.0980.07 |  |
| TCGA.66.2800.01A.01R.1201.07 |  |
| TCGA.70.6722.01A.11R.1820.07 |  |
| TCGA.70.6723.01A.11R.1820.07 |  |
| TCGA.77.6842.01A.11R.1949.07 |  |
| TCGA.77.6843.01A.11R.1949.07 |  |
| TCGA.77.6844.01A.11R.1949.07 |  |
| TCGA.77.6845.01A.11R.1949.07 |  |
| TCGA.79.5596.01A.31R.1949.07 |  |
| TCGA.85.6175.01A.11R.1820.07 |  |
| TCGA.85.6560.01A.11R.1820.07 |  |
| TCGA.85.6561.01A.11R.1820.07 |  |
| TCGA.85.6798.01A.11R.1949.07 |  |
| TCGA.90.6837.01A.11R.1949.07 |  |
| TCGA.94.7033.01A.11R.1949.07 |  |

## SUPPLEMENTARY FIGURE 1

Principal component analysis and hierarchical clustering.

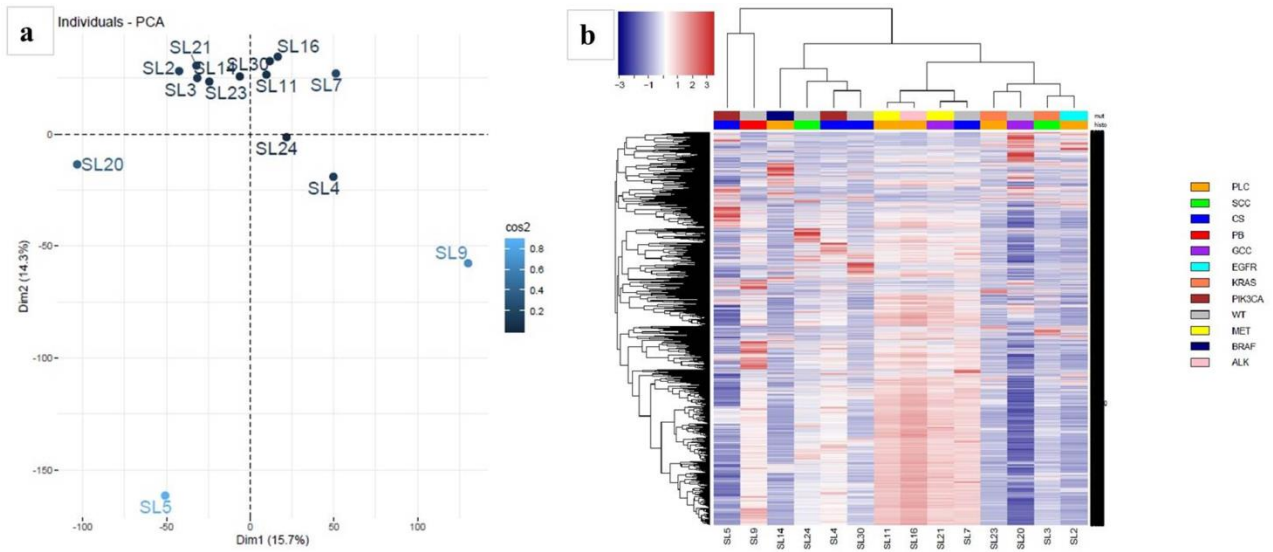

(a) Principal component analysis using transcriptome data; (b) hierarchical clustering using the expression levels of the 10,000 genes with the highest variance.

Samples histotypes: SL20, GCC; SL14, PLC; SL7, CS; SL5, CS; SL4, CS; SL30, CS; SL11, PLC; SL24, SCC; SL23, PLC; SL2, PLC; SL16, PLC; SL9, PB; SL21, GCC; SL3, SCC.

GCC, giant cell carcinoma; PLC, pleomorphic carcinoma; CS, carcinosarcoma; SCC, spindle cell carcinoma; PB, pulmonary blastoma.
